# Supplementary material for: Developmental cannabidiol exposure increases anxiety and modifies genome-wide brain DNA methylation in adult female mice
Source: Clin Epigenetics. 2021 Jan 6;13:4. doi: 10.1186/s13148-020-00993-4 (PMC7789000; doi:10.1186/s13148-020-00993-4)
Supplement: Supplementary file 1 — Additional file 1: Primer information for pyrosequencing of LINE1 and IAP transposons. [file 13148_2020_993_MOESM1_ESM.xlsx]

## Sheet: Sheet1
name	amplicon_length	n_cpgs	forward	reverse_5'_biotinylated	sequencing	annealing_temp	cycles
mLINE1	140	4	AAGGGGTTTGTGTTTTAGATTAGG	AACTCCCCACCAAATCCTAAAACCTCTA	TTTAGGTTTY GYGYGATTGG ATTGGGGTAG AYGTTGTGTT TTATTTATTA GAGGTTT	58	40
IAP	87	4	GTGTTATTTTTTGAT TGGTTGTAGTTT	ACCAAAAATATCTTA TAACTACTTATACT	TYGGTYGAGT TGAYGTTAYG GGGAAAGTAG AGTATAAGTA GTTA	56	40
