# Supplementary material for: Developmental cannabidiol exposure increases anxiety and modifies genome-wide brain DNA methylation in adult female mice
Source: Clin Epigenetics. 2021 Jan 6;13:4. doi: 10.1186/s13148-020-00993-4 (PMC7789000; doi:10.1186/s13148-020-00993-4)
Supplement: Supplementary file 7 — Additional file 7: Table of all unique, statistically significant differentially methylated loci (DMLs) identified between CBD-exposed and control tissues consisting of F0 cerebral cortex, F1 cerebral cortex, and F1 hippocampus. [file 13148_2020_993_MOESM7_ESM.xlsx]

## Sheet: F0 Cortex
seqnames	start	end	width	strand	name	annot.seqnames	annot.start	annot.end	annot.width	annot.strand	annot.id	annot.tx_id	annot.gene_id	annot.symbol	annot.type	chrpos
chr1	91342197	91342197	1	*	-89.88845412795735	chr1	91341944	91342540	597	+	intron:11255	ENSMUST00000088904.9	227357	Espnl	mm10_genes_introns	chr1:91342197
chr11	101953918	101953918	1	*	-96.59248465169935	chr11	101952480	101955694	3215	+	intron:438777	ENSMUST00000123249.1	73887	4930417O22Rik	mm10_genes_introns	chr11:101953918
chr12	82355634	82355634	1	*	86.33963526798591	chr12	82342500	82357232	14733	+	intron:477031	ENSMUST00000166429.8	217692	Sipa1l1	mm10_genes_introns	chr12:82355634
chr14	65036700	65036700	1	*	-87.75550635433346	chr14	65036497	65037345	849	+	intron:526526	ENSMUST00000043914.6	210925	Ints9	mm10_genes_introns	chr14:65036700
chr14	66850361	66850361	1	*	-94.47765844717556	chr14	66834377	66862472	28096	-	intron:540019	ENSMUST00000022629.8	12934	Dpysl2	mm10_genes_introns	chr14:66850361
chr15	48627721	48627721	1	*	-86.46867510657931	chr15	48622107	48673403	51297	-	intron:558614	ENSMUST00000160658.7	239420	Csmd3	mm10_genes_introns	chr15:48627721
chr17	24881188	24881188	1	*	91.94186521203693	chr17	24879953	24882010	2058	+	exon:718671	ENSMUST00000050714.7	16005	Igfals	mm10_genes_exons	chr17:24881188
chr17	51806261	51806261	1	*	-83.53827739647144	chr17	51805374	51809042	3669	-	intron:626006	ENSMUST00000144331.7	20230	Satb1	mm10_genes_introns	chr17:51806261
chr17	86302885	86302885	1	*	88.0740940754718	chr17	86168941	86353554	184614	+	intron:612377	ENSMUST00000097275.8	18754	Prkce	mm10_genes_introns	chr17:86302885
chr18	74709908	74709908	1	*	-88.18754490919797	chr18	74708619	74712618	4000	+	1to5kb:128745	ENSMUST00000177366.1	17919	Myo5b	mm10_genes_1to5kb	chr18:74709908
chr19	6528152	6528152	1	*	86.60766908948787	chr19	6519328	6531267	11940	+	intron:650148	ENSMUST00000113462.7	18190	Nrxn2	mm10_genes_introns	chr19:6528152
chr2	32659454	32659454	1	*	-86.33194046057633	chr2	32657671	32669422	11752	+	intron:51443	ENSMUST00000113272.7	13805	Eng	mm10_genes_introns	chr2:32659454
chr2	32981045	32981045	1	*	-84.05196389203714	chr2	32980102	32981360	1259	-	intron:78707	ENSMUST00000191777.5	56017	Slc2a8	mm10_genes_introns	chr2:32981045
chr2	34826919	34826919	1	*	-82.67343241429533	chr2	34826074	34827073	1000	-	promoter:15337	ENSMUST00000028220.9	30050	Fbxw2	mm10_genes_promoters	chr2:34826919
chr3	90142816	90142816	1	*	90.12392594328027	chr3	90137002	90144158	7157	+	intron:111539	ENSMUST00000029548.8	77595	Nup210l	mm10_genes_introns	chr3:90142816
chr4	130713716	130713716	1	*	92.81520371895556	chr4	130701111	130718153	17043	+	intron:148866	ENSMUST00000030315.12	80912	Pum1	mm10_genes_introns	chr4:130713716
chr4	154247857	154247857	1	*	85.49201887669314	chr4	154244296	154248295	4000	+	1to5kb:30086	ENSMUST00000183595.1	230971	Megf6	mm10_genes_1to5kb	chr4:154247857
chr5	31959872	31959872	1	*	-72.67065850111119	chr5	31901165	32001360	100196	+	intron:180096	ENSMUST00000201352.3	107976	Babam2	mm10_genes_introns	chr5:31959872
chr5	75152379	75152379	1	*	-87.16351657278773	chr5	75151935	75152934	1000	+	promoter:35895	ENSMUST00000201711.3	18595	Pdgfra	mm10_genes_promoters	chr5:75152379
chr5	139037006	139037006	1	*	-92.52224073221689	chr5	139020138	139037033	16896	-	intron:220700	ENSMUST00000026973.13	19085	Prkar1b	mm10_genes_introns	chr5:139037006
chr7	45466060	45466060	1	*	92.04479453297738	chr7	45466045	45467044	1000	-	promoter:59652	ENSMUST00000211615.1	12028	Bax	mm10_genes_promoters	chr7:45466060
chr7	140845839	140845839	1	*	-86.57012809984535	chr7	140845690	140846689	1000	-	promoter:63144	ENSMUST00000190581.1	78520	C330022C24Rik	mm10_genes_promoters	chr7:140845839
chr8	120520515	120520515	1	*	-84.34306532606286	chr8	120354180	120553583	199404	+	intron:329782	ENSMUST00000180448.2	382034	Gse1	mm10_genes_introns	chr8:120520515
chr9	72666450	72666450	1	*	-90.58454977799893	chr9	72663669	72667668	4000	+	1to5kb:72232	ENSMUST00000184180.1	17999	Nedd4	mm10_genes_1to5kb	chr9:72666450
chrX	13518216	13518216	1	*	-83.36764318829886	chrX	13517080	13522347	5268	-	exon:822548	ENSMUST00000156096.7	12361	Cask	mm10_genes_exons	chrX:13518216
chr1	165701665	165701665	1	*	71.12354913045078	chr1	165665051	165707890	42840	-	intron:40123	ENSMUST00000097474.8	226594	Rcsd1	mm10_genes_introns	chr1:165701665
chr10	121294433	121294433	1	*	-85.70505892585929	chr10	121288986	121294588	5603	-	intron:417871	ENSMUST00000064107.6	74694	Tbc1d30	mm10_genes_introns	chr10:121294433
chrX	73039732	73039732	1	*	-84.87562435160868	chrX	73038104	73042103	4000	-	1to5kb:138498	ENSMUST00000114540.3	385377	Pnma5	mm10_genes_1to5kb	chrX:73039732
chr6	86854149	86854149	1	*	-80.72887334221915	chr6	86850441	86854440	4000	-	1to5kb:49105	ENSMUST00000185414.1	67170	2610306M01Rik	mm10_genes_1to5kb	chr6:86854149
chr1	71648852	71648852	1	*	-86.20684552760059	chr1	71647837	71651836	4000	+	1to5kb:1295	ENSMUST00000097699.2	100042814	Apol7d	mm10_genes_1to5kb	chr1:71648852
chrX	50841564	50841564	1	*	-84.0259559096408	chrX	50841547	50841678	132	+	intron:674628	ENSMUST00000033444.10	70415	Stk26	mm10_genes_introns	chrX:50841564
chr19	6322369	6322369	1	*	76.56392348496097	chr19	6322254	6322371	118	+	exon:780537	ENSMUST00000025681.7	240505	Cdc42bpg	mm10_genes_exons	chr19:6322369
chr11	116448326	116448326	1	*	-82.10300921821778	chr11	116447992	116451991	4000	-	1to5kb:92976	ENSMUST00000140697.1	217341	Qrich2	mm10_genes_1to5kb	chr11:116448326
chr7	75132612	75132612	1	*	-77.76876686518929	chr7	75125705	75136297	10593	-	intron:299424	ENSMUST00000165175.7	64176	Sv2b	mm10_genes_introns	chr7:75132612
chr2	93873694	93873694	1	*	78.23687682512795	chr2	93870158	93874157	4000	-	1to5kb:17059	ENSMUST00000099690.3	381411	Accsl	mm10_genes_1to5kb	chr2:93873694
chr10	127350468	127350468	1	*	-81.11642966546538	chr10	127348857	127351011	2155	-	exon:503261	ENSMUST00000059718.5	16326	Inhbe	mm10_genes_exons	chr10:127350468
chrX	112601372	112601372	1	*	-82.77066562401811	chrX	112599274	112603273	4000	+	1to5kb:136669	ENSMUST00000071814.12	245595	Zfp711	mm10_genes_1to5kb	chrX:112601372
chr9	35188737	35188737	1	*	70.53260085146131	chr9	35188657	35189295	639	-	exon:445329	ENSMUST00000175765.7	117149	Tirap	mm10_genes_exons	chr9:35188737
chr5	150306764	150306764	1	*	-76.98754750548733	chr5	150196736	150310269	113534	+	intron:199171	ENSMUST00000200960.3	320365	Fry	mm10_genes_introns	chr5:150306764
chr5	112564684	112564684	1	*	80.82293408580657	chr5	112475587	112576771	101185	-	intron:212611	ENSMUST00000079491.13	56747	Sez6l	mm10_genes_introns	chr5:112564684
chr4	43741692	43741692	1	*	76.1452664142076	chr4	43732788	43751704	18917	+	intron:138408	ENSMUST00000142309.2	319973	A630077J23Rik	mm10_genes_introns	chr4:43741692
chr8	11405708	11405708	1	*	-80.92246118966081	chr8	11405000	11406812	1813	+	intron:314382	ENSMUST00000033899.13	12827	Col4a2	mm10_genes_introns	chr8:11405708
chr12	83111040	83111040	1	*	-81.0797691585957	chr12	83106884	83116112	9229	+	intron:477165	ENSMUST00000186848.4	50779	Rgs6	mm10_genes_introns	chr12:83111040
chr17	25416514	25416514	1	*	-76.18925221723681	chr17	25397846	25432869	35024	-	intron:616901	ENSMUST00000159610.7	58226	Cacna1h	mm10_genes_introns	chr17:25416514
chr11	94415103	94415103	1	*	77.82267284283799	chr11	94412680	94416679	4000	-	1to5kb:91668	ENSMUST00000133331.1	12291	Cacna1g	mm10_genes_1to5kb	chr11:94415103
chr5	114651279	114651279	1	*	79.02165515285141	chr5	114644931	114658341	13411	-	intron:213354	ENSMUST00000071968.8	63873	Trpv4	mm10_genes_introns	chr5:114651279
chr9	116590075	116590075	1	*	-76.19247008350844	chr9	116586096	116627889	41794	-	intron:385844	ENSMUST00000111773.9	207181	Rbms3	mm10_genes_introns	chr9:116590075
chr1	91824352	91824352	1	*	-84.10256852242759	chr1	91802150	91847388	45239	+	intron:11343	ENSMUST00000007949.3	13345	Twist2	mm10_genes_introns	chr1:91824352
chr4	43030514	43030514	1	*	-79.4865323647469	chr4	43029838	43030837	1000	-	promoter:30865	ENSMUST00000125180.1	66592	Stoml2	mm10_genes_promoters	chr4:43030514
chr9	63750417	63750417	1	*	-82.33578308452684	chr9	63667923	63757471	89549	-	intron:376488	ENSMUST00000034973.9	17127	Smad3	mm10_genes_introns	chr9:63750417
chr7	75265334	75265334	1	*	-73.48590099779206	chr7	75206923	75308873	101951	-	intron:299432	ENSMUST00000165175.7	64176	Sv2b	mm10_genes_introns	chr7:75265334
chr15	99696599	99696599	1	*	77.97046504025828	chr15	99696512	99696662	151	+	exon:666904	ENSMUST00000023758.8	11419	Asic1	mm10_genes_exons	chr15:99696599
chr5	117458173	117458173	1	*	-78.05763280480879	chr5	117415009	117500712	85704	+	intron:191743	ENSMUST00000073347.4	333050	Ksr2	mm10_genes_introns	chr5:117458173
chr7	16140565	16140565	1	*	-83.49060280179515	chr7	16140504	16141168	665	+	exon:312161	ENSMUST00000211649.1	110891	Slc8a2	mm10_genes_exons	chr7:16140565
chr17	26578294	26578294	1	*	72.69972052975055	chr17	26561633	26608592	46960	+	intron:598956	ENSMUST00000167662.7	67458	Ergic1	mm10_genes_introns	chr17:26578294
chr15	102160940	102160940	1	*	76.85021501830876	chr15	102160688	102161051	364	+	intron:555536	ENSMUST00000023806.13	223920	Soat2	mm10_genes_introns	chr15:102160940
chr17	31853747	31853747	1	*	82.90345917099448	chr17	31852576	31856575	4000	-	1to5kb:124949	ENSMUST00000234867.1	17691	Sik1	mm10_genes_1to5kb	chr17:31853747
chr13	60099892	60099892	1	*	-68.63523637564478	chr13	60029862	60110478	80617	+	intron:498545	ENSMUST00000225266.1	328263	A530065N20Rik	mm10_genes_introns	chr13:60099892
chr10	121439441	121439441	1	*	80.17262298723477	chr10	121417193	121476002	58810	-	intron:417893	ENSMUST00000026902.8	192678	Rassf3	mm10_genes_introns	chr10:121439441
chr5	36024555	36024555	1	*	82.75533243264445	chr5	36024095	36024566	472	-	intron:204148	ENSMUST00000037370.13	81840	Sorcs2	mm10_genes_introns	chr5:36024555
chrX	134111505	134111505	1	*	71.50642162318618	chrX	134107829	134111663	3835	-	intron:691868	ENSMUST00000033610.12	237038	Nox1	mm10_genes_introns	chrX:134111505
chr2	30011004	30011004	1	*	-74.73997307208107	chr2	30010910	30011107	198	+	exon:58772	ENSMUST00000113719.8	20740	Sptan1	mm10_genes_exons	chr2:30011004
chr2	49447812	49447812	1	*	-80.12321429759727	chr2	49446486	49450485	4000	+	1to5kb:10271	ENSMUST00000092123.10	227867	Epc2	mm10_genes_1to5kb	chr2:49447812
chr7	16140538	16140538	1	*	-74.37085158448423	chr7	16140504	16141168	665	+	exon:312161	ENSMUST00000211649.1	110891	Slc8a2	mm10_genes_exons	chr7:16140538
chr14	27171293	27171293	1	*	73.32047386106586	chr14	27153056	27208888	55833	+	intron:519479	ENSMUST00000225949.1	71704	Arhgef3	mm10_genes_introns	chr14:27171293
chr12	51957899	51957899	1	*	73.22513378229968	chr12	51957188	51958852	1665	-	intron:486153	ENSMUST00000040583.6	320487	Heatr5a	mm10_genes_introns	chr12:51957899
chr11	107708009	107708009	1	*	60.798064668297734	chr11	107705852	107716159	10308	-	intron:464808	ENSMUST00000021065.5	12299	Cacng1	mm10_genes_introns	chr11:107708009
chr7	4520708	4520708	1	*	74.63782504380183	chr7	4519765	4520764	1000	-	promoter:57127	ENSMUST00000132621.1	21954	Tnni3	mm10_genes_promoters	chr7:4520708
chr1	24195288	24195288	1	*	-78.94986890682489	chr1	24192017	24196016	4000	+	1to5kb:325	ENSMUST00000124600.1	12839	Col9a1	mm10_genes_1to5kb	chr1:24195288
chr14	71916416	71916416	1	*	-73.91728123016632	chr14	71898856	71920239	21384	+	intron:527252	ENSMUST00000228500.1	74667	4930434J06Rik	mm10_genes_introns	chr14:71916416
chr7	80209178	80209178	1	*	82.37249601087605	chr7	80198771	80212795	14025	+	intron:271434	ENSMUST00000032754.8	20352	Sema4b	mm10_genes_introns	chr7:80209178
chr5	122398931	122398931	1	*	-81.50498911296347	chr5	122395271	122399270	4000	+	1to5kb:37393	ENSMUST00000111716.7	56378	Arpc3	mm10_genes_1to5kb	chr5:122398931
chr4	151090176	151090176	1	*	79.90173681642486	chr4	151088982	151131541	42560	-	intron:174046	ENSMUST00000169423.8	100072	Camta1	mm10_genes_introns	chr4:151090176
chr6	89007993	89007993	1	*	-74.12807109294462	chr6	88950714	89101509	150796	+	intron:233447	ENSMUST00000168837.6	232217	4933427D06Rik	mm10_genes_introns	chr6:89007993
chr5	111385843	111385843	1	*	72.61841446252738	chr5	111385605	111386502	898	+	intron:189911	ENSMUST00000086635.8	56305	Pitpnb	mm10_genes_introns	chr5:111385843
chr4	133670137	133670137	1	*	-80.2024303775176	chr4	133669861	133672318	2458	-	intron:169840	ENSMUST00000062118.10	230801	Pigv	mm10_genes_introns	chr4:133670137
chr6	82429080	82429080	1	*	-64.74847604659278	chr6	82403999	82492525	88527	+	intron:230804	ENSMUST00000032122.10	21336	Tacr1	mm10_genes_introns	chr6:82429080
chr7	46520746	46520746	1	*	68.91391647183707	chr7	46515705	46590606	74902	-	intron:297804	ENSMUST00000033127.11	27414	Sergef	mm10_genes_introns	chr7:46520746
chr19	25600863	25600863	1	*	-71.71204341234262	chr19	25560012	25603186	43175	+	intron:653296	ENSMUST00000025755.10	50796	Dmrt1	mm10_genes_introns	chr19:25600863
chr5	32132588	32132588	1	*	72.75689821007664	chr5	32130801	32134800	4000	+	1to5kb:34941	ENSMUST00000031017.10	14284	Fosl2	mm10_genes_1to5kb	chr5:32132588
chr15	98005439	98005439	1	*	-73.83108787462291	chr15	98004658	98005657	1000	-	promoter:114926	ENSMUST00000088355.11	12824	Col2a1	mm10_genes_promoters	chr15:98005439
chrX	12047004	12047004	1	*	-77.2881469761211	chrX	12046856	12047113	258	-	exon:822322	ENSMUST00000065143.13	71458	Bcor	mm10_genes_exons	chrX:12047004
chr17	31114445	31114445	1	*	55.80886561706239	chr17	31114057	31117988	3932	+	exon:723630	ENSMUST00000024829.7	11307	Abcg1	mm10_genes_exons	chr17:31114445
chr9	90111866	90111866	1	*	-79.4801590465502	chr9	90110173	90114535	4363	-	intron:380001	ENSMUST00000085248.11	21761	Morf4l1	mm10_genes_introns	chr9:90111866
chr12	80244215	80244215	1	*	75.12879799540593	chr12	80209474	80259986	50513	-	intron:488704	ENSMUST00000021554.15	109711	Actn1	mm10_genes_introns	chr12:80244215
chr10	20227809	20227809	1	*	-76.05256883770535	chr10	20224795	20228794	4000	+	1to5kb:78396	ENSMUST00000213312.1	17761	Map7	mm10_genes_1to5kb	chr10:20227809
chr18	56497221	56497221	1	*	67.12483734169375	chr18	56492000	56497319	5320	+	intron:636012	ENSMUST00000237355.1	107022	Gramd3	mm10_genes_introns	chr18:56497221
chr13	54694835	54694835	1	*	-61.23051805670801	chr13	54693848	54694847	1000	-	promoter:102694	ENSMUST00000037422.15	105239	Rnf44	mm10_genes_promoters	chr13:54694835
chr8	110168699	110168699	1	*	-71.10086424755299	chr8	110168211	110169210	1000	-	promoter:69480	ENSMUST00000212297.1	12308	Calb2	mm10_genes_promoters	chr8:110168699
chr19	6925955	6925955	1	*	80.6676801854949	chr19	6925360	6926359	1000	-	promoter:133358	ENSMUST00000237380.1	67077	Catsperz	mm10_genes_promoters	chr19:6925955
chr10	20227805	20227805	1	*	-75.12499417601036	chr10	20224795	20228794	4000	+	1to5kb:78396	ENSMUST00000213312.1	17761	Map7	mm10_genes_1to5kb	chr10:20227805
chr2	71505387	71505387	1	*	70.64575971544774	chr2	71505258	71509257	4000	+	1to5kb:10653	ENSMUST00000138873.7	66559	Metap1d	mm10_genes_1to5kb	chr2:71505387
chr2	135199381	135199381	1	*	-67.81880401581274	chr2	134988193	135220717	232525	+	intron:64164	ENSMUST00000131552.4	18795	Plcb1	mm10_genes_introns	chr2:135199381
chr2	140773788	140773788	1	*	-76.79977639051884	chr2	140452687	140825051	372365	+	intron:64658	ENSMUST00000110067.7	72899	Macrod2	mm10_genes_introns	chr2:140773788
chr6	127578556	127578556	1	*	-75.47124479967714	chr6	127578092	127603829	25738	+	intron:239088	ENSMUST00000212051.1	381812	Cracr2a	mm10_genes_introns	chr6:127578556
chrX	48623740	48623740	1	*	74.83270830478799	chrX	48622749	48623748	1000	+	promoter:135616	ENSMUST00000153047.7	20523	Slc25a14	mm10_genes_promoters	chrX:48623740
chr11	113710602	113710602	1	*	-61.82617527574745	chr11	113710018	113711017	1000	-	promoter:92734	ENSMUST00000018871.7	52670	Cpsf4l	mm10_genes_promoters	chr11:113710602
chr7	105625205	105625205	1	*	-80.3111817271201	chr7	105619615	105625405	5791	-	intron:304373	ENSMUST00000106791.7	55992	Trim3	mm10_genes_introns	chr7:105625205
chr8	14189269	14189269	1	*	-59.35560636961809	chr8	14096142	14257971	161830	+	intron:315526	ENSMUST00000152652.7	244310	Dlgap2	mm10_genes_introns	chr8:14189269
chr12	79010480	79010480	1	*	-76.4378111719362	chr12	79008628	79012627	4000	-	1to5kb:97381	ENSMUST00000174697.1	268567	Tmem229b	mm10_genes_1to5kb	chr12:79010480
chr8	117601030	117601030	1	*	-77.15877282489886	chr8	117598494	117601127	2634	+	intron:329379	ENSMUST00000081232.8	234779	Plcg2	mm10_genes_introns	chr8:117601030
chr10	121439432	121439432	1	*	77.53817276780978	chr10	121417193	121476002	58810	-	intron:417893	ENSMUST00000026902.8	192678	Rassf3	mm10_genes_introns	chr10:121439432
chr18	25592474	25592474	1	*	-59.80380026419007	chr18	25537756	25679412	141657	-	intron:642239	ENSMUST00000115816.2	108013	Celf4	mm10_genes_introns	chr18:25592474
chr16	33708210	33708210	1	*	57.404017273139495	chr16	33684856	33710399	25544	+	intron:578090	ENSMUST00000232568.1	77446	Heg1	mm10_genes_introns	chr16:33708210
chr15	78082181	78082181	1	*	-70.25069084872688	chr15	78013397	78118680	105284	-	intron:563724	ENSMUST00000019290.2	12300	Cacng2	mm10_genes_introns	chr15:78082181
chr11	89459878	89459878	1	*	63.511432293401896	chr11	89456147	89503898	47752	-	intron:458620	ENSMUST00000238273.2	382543	Ankfn1	mm10_genes_introns	chr11:89459878
chr4	139359552	139359552	1	*	60.78474458751395	chr4	139359367	139360029	663	+	intron:151357	ENSMUST00000179784.8	230866	Emc1	mm10_genes_introns	chr4:139359552
chr9	14623795	14623795	1	*	70.57356058640697	chr9	14596601	14633901	37301	-	intron:367690	ENSMUST00000160770.8	75723	Amotl1	mm10_genes_introns	chr9:14623795
chr4	107439734	107439734	1	*	69.4349761748926	chr4	107435938	107563844	127907	+	intron:143707	ENSMUST00000135835.7	230587	Glis1	mm10_genes_introns	chr4:107439734
chr18	23570474	23570474	1	*	72.57571009880209	chr18	23569776	23583083	13308	+	intron:632083	ENSMUST00000115832.3	13527	Dtna	mm10_genes_introns	chr18:23570474
chr11	86992128	86992128	1	*	54.61832564618169	chr11	86972123	86993591	21469	-	intron:458313	ENSMUST00000018571.4	77864	Ypel2	mm10_genes_introns	chr11:86992128
chrX	13833290	13833290	1	*	-59.377080251086745	chrX	13786050	13846007	59958	-	intron:684751	ENSMUST00000115436.8	12361	Cask	mm10_genes_introns	chrX:13833290
chr19	5704997	5704997	1	*	69.98161381599976	chr19	5704021	5705020	1000	+	promoter:130948	ENSMUST00000235419.1	16530	Kcnk7	mm10_genes_promoters	chr19:5704997
chr5	3382515	3382515	1	*	81.11104003152712	chr5	3344600	3390680	46081	+	intron:175882	ENSMUST00000165117.7	12571	Cdk6	mm10_genes_introns	chr5:3382515
chr1	135539042	135539042	1	*	-65.13490065676709	chr1	135537300	135584554	47255	-	intron:36012	ENSMUST00000040599.14	215690	Nav1	mm10_genes_introns	chr1:135539042
chr9	121497191	121497191	1	*	-80.31402479010823	chr9	121494565	121498564	4000	-	1to5kb:77899	ENSMUST00000216176.1	12424	Cck	mm10_genes_1to5kb	chr9:121497191
chr19	5844514	5844514	1	*	79.81855020994428	chr19	5844438	5845437	1000	-	promoter:133215	ENSMUST00000183800.1	66961	Neat1	mm10_genes_promoters	chr19:5844514
chr19	6528109	6528109	1	*	72.3723332786674	chr19	6519328	6531267	11940	+	intron:650148	ENSMUST00000113462.7	18190	Nrxn2	mm10_genes_introns	chr19:6528109
chr1	120176047	120176047	1	*	-79.40802206024735	chr1	120166173	120188040	21868	+	intron:13406	ENSMUST00000027637.12	73103	3110009E18Rik	mm10_genes_introns	chr1:120176047
chr17	80558885	80558885	1	*	68.67030875862896	chr17	80556429	80560349	3921	-	intron:629149	ENSMUST00000086545.4	381113	Cdkl4	mm10_genes_introns	chr17:80558885
chr4	151306635	151306635	1	*	-63.95469726172942	chr4	151290104	151453283	163180	-	intron:174052	ENSMUST00000169423.8	100072	Camta1	mm10_genes_introns	chr4:151306635
chr11	117769186	117769186	1	*	-80.5705265916115	chr11	117769074	117770073	1000	-	promoter:93030	ENSMUST00000148220.1	217353	Tmc6	mm10_genes_promoters	chr11:117769186
chr13	117958912	117958912	1	*	-74.13718026057184	chr13	117925785	117971566	45782	+	intron:502894	ENSMUST00000006991.8	15165	Hcn1	mm10_genes_introns	chr13:117958912
chr15	102108915	102108915	1	*	-76.07889119724992	chr15	102108131	102112130	4000	+	1to5kb:112578	ENSMUST00000229035.1	209039	Tns2	mm10_genes_1to5kb	chr15:102108915
chr2	59307298	59307298	1	*	75.73886588173964	chr2	59305493	59308007	2515	+	intron:53285	ENSMUST00000168631.7	227937	Pkp4	mm10_genes_introns	chr2:59307298
chrX	13518218	13518218	1	*	-75.75059898281144	chrX	13517080	13522347	5268	-	exon:822548	ENSMUST00000156096.7	12361	Cask	mm10_genes_exons	chrX:13518218
chr8	45911049	45911049	1	*	63.91585110607758	chr8	45910032	45914031	4000	+	1to5kb:64562	ENSMUST00000209216.1	53318	Pdlim3	mm10_genes_1to5kb	chr8:45911049
chr10	80186848	80186848	1	*	-63.17349080576912	chr10	80186752	80187065	314	+	exon:476566	ENSMUST00000003154.6	13637	Efna2	mm10_genes_exons	chr10:80186848
chr2	7015537	7015537	1	*	72.32626760709839	chr2	6962415	7185471	223057	-	intron:72893	ENSMUST00000002176.12	14007	Celf2	mm10_genes_introns	chr2:7015537
chr11	72412027	72412027	1	*	-64.9331482151073	chr11	72411712	72412711	1000	-	promoter:90936	ENSMUST00000108500.7	276829	Smtnl2	mm10_genes_promoters	chr11:72412027
chr15	83562815	83562815	1	*	-75.4848165680859	chr15	83562592	83563591	1000	+	promoter:111961	ENSMUST00000047419.7	12257	Tspo	mm10_genes_promoters	chr15:83562815
chr16	34968637	34968637	1	*	-75.00310546995563	chr16	34963847	34971241	7395	+	intron:578302	ENSMUST00000023538.8	107589	Mylk	mm10_genes_introns	chr16:34968637
chr2	30011042	30011042	1	*	-71.17627594716203	chr2	30010910	30011107	198	+	exon:58772	ENSMUST00000113719.8	20740	Sptan1	mm10_genes_exons	chr2:30011042
chr10	81286798	81286798	1	*	-67.40821510864686	chr10	81286770	81290769	4000	-	1to5kb:83353	ENSMUST00000218484.1	27375	Tjp3	mm10_genes_1to5kb	chr10:81286798
chr7	46655421	46655421	1	*	-72.55641201886648	chr7	46652420	46656419	4000	-	1to5kb:59781	ENSMUST00000110264.2	21990	Tph1	mm10_genes_1to5kb	chr7:46655421
chrX	93832259	93832259	1	*	53.66084254573587	chrX	93832202	93833201	1000	-	promoter:138893	ENSMUST00000045748.6	236900	Pdk3	mm10_genes_promoters	chrX:93832259
chr8	16049957	16049957	1	*	80.59690940183093	chr8	16037309	16058662	21354	-	intron:333035	ENSMUST00000082104.6	94109	Csmd1	mm10_genes_introns	chr8:16049957
chrX	36796332	36796332	1	*	-72.08771723039038	chrX	36796279	36797278	1000	+	promoter:135435	ENSMUST00000156672.1	11740	Slc25a5	mm10_genes_promoters	chrX:36796332
chr8	70409705	70409705	1	*	-65.3564925590094	chr8	70409012	70439432	30421	-	intron:337744	ENSMUST00000076615.5	382056	Crtc1	mm10_genes_introns	chr8:70409705
chr11	61547134	61547134	1	*	76.71249961445491	chr11	61546374	61547373	1000	-	promoter:90381	ENSMUST00000148956.7	13855	Epn2	mm10_genes_promoters	chr11:61547134
chrX	140062076	140062076	1	*	78.10762853040795	chrX	140061879	140062878	1000	+	promoter:137006	ENSMUST00000044806.2	331537	Pih1h3b	mm10_genes_promoters	chrX:140062076
chr11	117123472	117123472	1	*	-75.45853943926298	chr11	117117253	117141417	24165	+	intron:442437	ENSMUST00000127090.7	74136	Sec14l1	mm10_genes_introns	chr11:117123472
chr2	126608055	126608055	1	*	-66.64158780120441	chr2	126607642	126608641	1000	-	promoter:17825	ENSMUST00000132382.1	15186	Hdc	mm10_genes_promoters	chr2:126608055
chr2	38196870	38196870	1	*	58.103314520357706	chr2	38159851	38243401	83551	-	intron:79959	ENSMUST00000102787.9	227801	Dennd1a	mm10_genes_introns	chr2:38196870
chr5	128136927	128136927	1	*	55.05911339352727	chr5	128136883	128137029	147	-	exon:259145	ENSMUST00000044441.7	243274	Tmem132d	mm10_genes_exons	chr5:128136927
chrX	50841534	50841534	1	*	-77.84766764856782	chrX	50841047	50841546	500	+	5UTR:91659	ENSMUST00000033444.10	70415	Stk26	mm10_genes_5UTRs	chrX:50841534
chr10	121294108	121294108	1	*	77.96615125804256	chr10	121288986	121294588	5603	-	intron:417871	ENSMUST00000064107.6	74694	Tbc1d30	mm10_genes_introns	chr10:121294108
chr2	131523705	131523705	1	*	-60.37228610709098	chr2	131522220	131524742	2523	+	intron:63924	ENSMUST00000028806.11	228608	Smox	mm10_genes_introns	chr2:131523705
chr11	115449190	115449190	1	*	-66.90253228821737	chr11	115449061	115453060	4000	-	1to5kb:92816	ENSMUST00000175355.1	100628623	Mir3968	mm10_genes_1to5kb	chr11:115449190
chr5	121828442	121828442	1	*	-75.36570472902109	chr5	121828402	121829076	675	-	exon:256421	ENSMUST00000136960.7	16923	Sh2b3	mm10_genes_exons	chr5:121828442
chr11	113444683	113444683	1	*	76.37644043746849	chr11	113369899	113463971	94073	-	intron:465443	ENSMUST00000071539.9	69806	Slc39a11	mm10_genes_introns	chr11:113444683
chr14	54748660	54748660	1	*	-73.55339515656375	chr14	54737666	54758438	20773	-	intron:537308	ENSMUST00000022787.7	50934	Slc7a8	mm10_genes_introns	chr14:54748660
chr7	134811168	134811168	1	*	55.490153422923846	chr7	134804651	134848141	43491	+	intron:282212	ENSMUST00000211570.1	330662	Dock1	mm10_genes_introns	chr7:134811168
chr7	126963570	126963570	1	*	-63.102231051868266	chr7	126962743	126966742	4000	+	1to5kb:55941	ENSMUST00000134471.1	233878	Sez6l2	mm10_genes_1to5kb	chr7:126963570
chr14	26357246	26357246	1	*	-81.34203014163907	chr14	26356547	26357546	1000	+	promoter:105000	ENSMUST00000059648.9	71106	4933413J09Rik	mm10_genes_promoters	chr14:26357246
chr5	66568254	66568254	1	*	-65.63665902284377	chr5	66543618	66618567	74950	-	intron:206341	ENSMUST00000162366.7	11787	Apbb2	mm10_genes_introns	chr5:66568254
chr9	119767977	119767977	1	*	-66.14901864344675	chr9	119765570	119768348	2779	-	intron:386345	ENSMUST00000215718.1	24046	Scn11a	mm10_genes_introns	chr9:119767977
chr9	116158653	116158653	1	*	-65.05941671808036	chr9	116158346	116174943	16598	-	intron:385835	ENSMUST00000061101.11	21813	Tgfbr2	mm10_genes_introns	chr9:116158653
chr10	121439465	121439465	1	*	75.19412574698366	chr10	121417193	121476002	58810	-	intron:417893	ENSMUST00000026902.8	192678	Rassf3	mm10_genes_introns	chr10:121439465
chr13	63676115	63676115	1	*	-66.49469243200721	chr13	63675973	63677412	1440	-	intron:510233	ENSMUST00000221859.1	75522	1700024I08Rik	mm10_genes_introns	chr13:63676115
chr1	191898629	191898629	1	*	54.19998368965283	chr1	191898618	191898826	209	-	exon:52078	ENSMUST00000140401.1	98736	1700034H15Rik	mm10_genes_exons	chr1:191898629
chr9	35188729	35188729	1	*	62.71010472678261	chr9	35188657	35189295	639	-	exon:445329	ENSMUST00000175765.7	117149	Tirap	mm10_genes_exons	chr9:35188729
chr4	119872969	119872969	1	*	73.68692225070446	chr4	119872651	119873337	687	+	exon:175379	ENSMUST00000141605.7	16656	Hivep3	mm10_genes_exons	chr4:119872969
chr19	56326480	56326480	1	*	56.26702562665151	chr19	56321017	56328995	7979	-	intron:670206	ENSMUST00000167239.7	18175	Nrap	mm10_genes_introns	chr19:56326480
chr12	52105256	52105256	1	*	-56.42766311163051	chr12	52105219	52105395	177	+	exon:567890	ENSMUST00000159708.7	76826	Nubpl	mm10_genes_exons	chr12:52105256
chr4	148879178	148879178	1	*	63.78375121407702	chr4	148838421	148890321	51901	+	intron:152928	ENSMUST00000094464.9	69743	Casz1	mm10_genes_introns	chr4:148879178
chr2	114119931	114119931	1	*	70.36566971341301	chr2	114119188	114120187	1000	-	promoter:17432	ENSMUST00000140441.1	11834	Aqr	mm10_genes_promoters	chr2:114119931
chr8	84790877	84790877	1	*	56.7590322630776	chr8	84772316	84799997	27682	-	intron:339962	ENSMUST00000076715.12	18032	Nfix	mm10_genes_introns	chr8:84790877
chr2	153467002	153467002	1	*	72.29425770049352	chr2	153436348	153470687	34340	-	intron:97999	ENSMUST00000035346.13	329540	Nol4l	mm10_genes_introns	chr2:153467002
chr10	81431558	81431558	1	*	-50.93998385340559	chr10	81431006	81432005	1000	-	promoter:83386	ENSMUST00000117966.1	18029	Nfic	mm10_genes_promoters	chr10:81431558
chr11	3505290	3505290	1	*	66.3131353743209	chr11	3504822	3505821	1000	-	promoter:88987	ENSMUST00000044507.11	170835	Inpp5j	mm10_genes_promoters	chr11:3505290
chr16	34244013	34244013	1	*	59.042216518727855	chr16	34243967	34252224	8258	-	intron:588701	ENSMUST00000076810.11	545156	Kalrn	mm10_genes_introns	chr16:34244013
chr2	165597381	165597381	1	*	66.85646648987039	chr2	165595265	165664785	69521	+	intron:69605	ENSMUST00000088132.12	14049	Eya2	mm10_genes_introns	chr2:165597381
chr8	105996211	105996211	1	*	65.50913597070064	chr8	105992750	105996749	4000	-	1to5kb:69369	ENSMUST00000117555.7	319446	Dpep2	mm10_genes_1to5kb	chr8:105996211
chr5	122725188	122725188	1	*	-63.51065888910389	chr5	122722664	122726663	4000	+	1to5kb:37423	ENSMUST00000139712.1	18438	P2rx4	mm10_genes_1to5kb	chr5:122725188
chr4	151765228	151765228	1	*	-61.93091340143527	chr4	151586483	151830417	243935	-	intron:174054	ENSMUST00000169423.8	100072	Camta1	mm10_genes_introns	chr4:151765228
chr5	31784627	31784627	1	*	-68.0825671409836	chr5	31784383	31785382	1000	+	promoter:34936	ENSMUST00000202270.1	107976	Babam2	mm10_genes_promoters	chr5:31784627
chr1	153009444	153009444	1	*	-66.63754614296109	chr1	152955194	153073796	118603	+	intron:16576	ENSMUST00000186368.6	226518	Nmnat2	mm10_genes_introns	chr1:153009444
chr12	109725525	109725525	1	*	68.66557711480658	chr12	109721822	109725821	4000	+	1to5kb:95794	ENSMUST00000083632.3	723935	Mir381	mm10_genes_1to5kb	chr12:109725525
chr5	110378038	110378038	1	*	64.70731717751079	chr5	110378038	110378255	218	-	exon:253299	ENSMUST00000069483.11	381668	Fbrsl1	mm10_genes_exons	chr5:110378038
chr7	44744505	44744505	1	*	63.039984222731746	chr7	44744231	44745230	1000	-	promoter:59395	ENSMUST00000149011.8	243963	Zfp473	mm10_genes_promoters	chr7:44744505
chr4	137697794	137697794	1	*	64.4214147927394	chr4	137664845	137704073	39229	+	intron:150628	ENSMUST00000139831.7	110351	Rap1gap	mm10_genes_introns	chr4:137697794
chr11	75153037	75153037	1	*	-53.093533157578975	chr11	75142904	75156160	13257	+	intron:431255	ENSMUST00000045281.12	103677	Smg6	mm10_genes_introns	chr11:75153037
chr15	100613428	100613428	1	*	55.275468309103395	chr15	100610349	100614348	4000	+	1to5kb:112472	ENSMUST00000000356.9	23994	Dazap2	mm10_genes_1to5kb	chr15:100613428
chr1	193330181	193330181	1	*	67.67263151269789	chr1	193330040	193330195	156	+	exon:26000	ENSMUST00000194677.5	16780	Lamb3	mm10_genes_exons	chr1:193330181
chr5	147630777	147630777	1	*	-55.864168021581406	chr5	147615261	147634376	19116	-	intron:222302	ENSMUST00000031653.11	14254	Flt1	mm10_genes_introns	chr5:147630777
chr3	98057250	98057250	1	*	77.16303674662912	chr3	98047810	98070859	23050	+	intron:113835	ENSMUST00000198324.1	18129	Notch2	mm10_genes_introns	chr3:98057250
chr9	106666539	106666539	1	*	58.89463307112063	chr9	106664958	106668957	4000	-	1to5kb:77255	ENSMUST00000191205.6	21767	Tex264	mm10_genes_1to5kb	chr9:106666539
chr19	6925943	6925943	1	*	77.55683684892969	chr19	6925360	6926359	1000	-	promoter:133358	ENSMUST00000237380.1	67077	Catsperz	mm10_genes_promoters	chr19:6925943
chr11	99993926	99993926	1	*	-72.83940150921158	chr11	99993234	99993994	761	-	exon:553319	ENSMUST00000105049.1	77914	Krtap17-1	mm10_genes_exons	chr11:99993926
chr5	149170943	149170943	1	*	-53.69448694621892	chr5	149050752	149181998	131247	-	intron:222484	ENSMUST00000202133.3	15289	Hmgb1	mm10_genes_introns	chr5:149170943
chr2	25822378	25822378	1	*	59.6570776709283	chr2	25822153	25823152	1000	+	promoter:9330	ENSMUST00000023978.2	77704	Lcn9	mm10_genes_promoters	chr2:25822378
chr15	77798164	77798164	1	*	66.26370268229302	chr15	77797029	77807867	10839	-	intron:563611	ENSMUST00000016771.12	17886	Myh9	mm10_genes_introns	chr15:77798164
chr2	144059663	144059663	1	*	-62.66400892040558	chr2	144033169	144062296	29128	+	intron:64787	ENSMUST00000037722.8	403171	Banf2	mm10_genes_introns	chr2:144059663
chr4	154347071	154347071	1	*	56.2890952000757	chr4	154346143	154347923	1781	-	intron:174900	ENSMUST00000030902.12	70673	Prdm16	mm10_genes_introns	chr4:154347071
chr8	75008535	75008535	1	*	63.61156070551597	chr8	75001585	75020243	18659	+	intron:321928	ENSMUST00000041759.13	70823	Hmgxb4	mm10_genes_introns	chr8:75008535
chr1	130397987	130397987	1	*	-69.00090846307873	chr1	130388730	130409871	21142	-	intron:34189	ENSMUST00000112488.8	13137	Cd55b	mm10_genes_introns	chr1:130397987
chr10	79622902	79622902	1	*	66.02690402296412	chr10	79622725	79623724	1000	-	promoter:83108	ENSMUST00000168116.1	216148	Shc2	mm10_genes_promoters	chr10:79622902
chr1	43147074	43147074	1	*	-63.268491454586176	chr1	43141873	43153075	11203	-	intron:25488	ENSMUST00000008280.13	14200	Fhl2	mm10_genes_introns	chr1:43147074
chr14	48223065	48223065	1	*	57.40638771408149	chr14	48168327	48240209	71883	+	intron:523119	ENSMUST00000073150.5	93834	Peli2	mm10_genes_introns	chr14:48223065
chr2	105373536	105373536	1	*	51.715370318439156	chr2	105297969	105378629	80661	+	intron:58766	ENSMUST00000068813.2	74088	Them7	mm10_genes_introns	chr2:105373536
chr19	47821639	47821639	1	*	-58.25754941054944	chr19	47815973	47823028	7056	-	intron:669463	ENSMUST00000160247.2	100048534	Cfap43	mm10_genes_introns	chr19:47821639
chr11	90654310	90654310	1	*	-63.50881078784168	chr11	90650930	90654929	4000	-	1to5kb:91617	ENSMUST00000127034.1	71943	Tom1l1	mm10_genes_1to5kb	chr11:90654310
chr6	56380631	56380631	1	*	62.225115636076154	chr6	56181798	56441985	260188	-	intron:246005	ENSMUST00000203372.2	18575	Pde1c	mm10_genes_introns	chr6:56380631
chr2	93049465	93049465	1	*	-78.15920992659206	chr2	93046572	93050571	4000	-	1to5kb:17010	ENSMUST00000111274.8	100042784	Prdm11	mm10_genes_1to5kb	chr2:93049465
chr5	52866554	52866554	1	*	65.61316550895333	chr5	52866395	52867797	1403	+	exon:218865	ENSMUST00000031072.13	52206	Anapc4	mm10_genes_exons	chr5:52866554
chr11	100756587	100756587	1	*	-54.784862514165745	chr11	100755914	100756859	946	-	intron:461858	ENSMUST00000107361.8	380728	Kcnh4	mm10_genes_introns	chr11:100756587
chr10	105482141	105482141	1	*	-68.0244314938317	chr10	105413788	105573666	159879	-	intron:416460	ENSMUST00000061506.8	278279	Tmtc2	mm10_genes_introns	chr10:105482141
chr7	100289116	100289116	1	*	72.69439810647326	chr7	100288810	100292809	4000	+	1to5kb:54753	ENSMUST00000138465.2	320452	P4ha3	mm10_genes_1to5kb	chr7:100289116
chr15	74620122	74620122	1	*	45.94426941829798	chr15	74616399	74621100	4702	-	intron:561170	ENSMUST00000137963.7	69439	Mroh4	mm10_genes_introns	chr15:74620122
chr4	129488787	129488787	1	*	-63.14986892004239	chr4	129486190	129490189	4000	+	1to5kb:29040	ENSMUST00000106043.2	68233	Fam229a	mm10_genes_1to5kb	chr4:129488787
chr3	95173171	95173171	1	*	65.49345829061177	chr3	95172255	95173653	1399	+	exon:134150	ENSMUST00000204709.2	20360	Sema6c	mm10_genes_exons	chr3:95173171
chr10	42952290	42952290	1	*	-61.64663471924812	chr10	42947142	42955888	8747	+	intron:390710	ENSMUST00000063063.13	268297	Scml4	mm10_genes_introns	chr10:42952290
chr4	133372638	133372638	1	*	-49.87368191101199	chr4	133370908	133411836	40929	+	intron:149531	ENSMUST00000030669.7	20544	Slc9a1	mm10_genes_introns	chr4:133372638
chrX	166569319	166569319	1	*	-57.31781577482792	chrX	166568522	166585455	16934	-	intron:694184	ENSMUST00000000412.2	54156	Egfl6	mm10_genes_introns	chrX:166569319
chr5	137513878	137513878	1	*	-55.98423965845463	chr5	137513548	137517547	4000	+	1to5kb:38020	ENSMUST00000197624.4	57330	Gigyf1	mm10_genes_1to5kb	chr5:137513878
chr9	44108827	44108827	1	*	-75.63083492563632	chr9	44108295	44109187	893	+	exon:421598	ENSMUST00000034654.8	259172	Mfrp	mm10_genes_exons	chr9:44108827
chr7	125646429	125646429	1	*	68.03245593764909	chr7	125645805	125646473	669	-	intron:307568	ENSMUST00000205659.1	233863	Gtf3c1	mm10_genes_introns	chr7:125646429
chr15	27894304	27894304	1	*	-66.81347368861412	chr15	27891473	27897833	6361	-	intron:557456	ENSMUST00000090247.6	223435	Trio	mm10_genes_introns	chr15:27894304
chr5	53107829	53107829	1	*	56.37842651025298	chr5	53107083	53108174	1092	-	exon:245730	ENSMUST00000031090.7	231238	Sel1l3	mm10_genes_exons	chr5:53107829
chr15	101135981	101135981	1	*	69.1020782101451	chr15	101132600	101136599	4000	+	1to5kb:112523	ENSMUST00000128525.1	11482	Acvrl1	mm10_genes_1to5kb	chr15:101135981
chr5	131477223	131477223	1	*	62.583062182405655	chr5	131477025	131478024	1000	-	promoter:42152	ENSMUST00000187544.6	319974	Auts2	mm10_genes_promoters	chr5:131477223
chr4	123240180	123240180	1	*	60.61018165691525	chr4	123240131	123240197	67	+	exon:175754	ENSMUST00000040821.4	56198	Heyl	mm10_genes_exons	chr4:123240180
chr4	151321639	151321639	1	*	64.77133218250293	chr4	151290104	151453283	163180	-	intron:174052	ENSMUST00000169423.8	100072	Camta1	mm10_genes_introns	chr4:151321639
chr4	149907194	149907194	1	*	-71.55749523662628	chr4	149907110	149907257	148	-	5UTR:22687	ENSMUST00000038562.8	74646	Spsb1	mm10_genes_5UTRs	chr4:149907194
chr4	106514335	106514335	1	*	70.51473363623221	chr4	106503091	106522318	19228	-	intron:163255	ENSMUST00000238822.1	329909	Tmem61	mm10_genes_introns	chr4:106514335
chr10	119818355	119818355	1	*	-67.54803718594367	chr10	119814389	119818388	4000	+	1to5kb:81040	ENSMUST00000105262.8	74053	Grip1	mm10_genes_1to5kb	chr10:119818355
chr5	117100846	117100846	1	*	49.569439079251495	chr5	117099812	117103811	4000	-	1to5kb:41540	ENSMUST00000202684.1	71954	Suds3	mm10_genes_1to5kb	chr5:117100846
chr11	113702850	113702850	1	*	-67.26911102356502	chr11	113702712	113703366	655	-	exon:558250	ENSMUST00000151396.1	52670	Cpsf4l	mm10_genes_exons	chr11:113702850
chr17	56755890	56755890	1	*	-63.57842026821613	chr17	56752491	56757195	4705	-	intron:626766	ENSMUST00000044752.5	18188	Nrtn	mm10_genes_introns	chr17:56755890
chr4	136956062	136956062	1	*	-61.453999508213485	chr4	136951830	136956656	4827	-	intron:170962	ENSMUST00000030420.8	13842	Epha8	mm10_genes_introns	chr4:136956062
chr6	90716973	90716973	1	*	-60.72754039966224	chr6	90716530	90717529	1000	-	promoter:49297	ENSMUST00000101153.9	232227	Iqsec1	mm10_genes_promoters	chr6:90716973
chr1	74005584	74005584	1	*	-79.84677518007626	chr1	74002568	74006567	4000	-	1to5kb:5658	ENSMUST00000190389.6	21961	Tns1	mm10_genes_1to5kb	chr1:74005584
chr7	27408706	27408706	1	*	-60.94623681954718	chr7	27408243	27409176	934	-	exon:349127	ENSMUST00000011895.13	80297	Sptbn4	mm10_genes_exons	chr7:27408706
chr9	43777785	43777785	1	*	-68.53053192126468	chr9	43744723	43791036	46314	+	intron:350332	ENSMUST00000034510.8	58235	Nectin1	mm10_genes_introns	chr9:43777785
chr5	134742238	134742238	1	*	47.56450061217704	chr5	134739573	134747156	7584	-	intron:218820	ENSMUST00000015138.12	13717	Eln	mm10_genes_introns	chr5:134742238
chr13	34919628	34919628	1	*	-64.81547800049087	chr13	34919409	34923408	4000	+	1to5kb:99511	ENSMUST00000160279.7	66761	4933417A18Rik	mm10_genes_1to5kb	chr13:34919628
chr6	48463943	48463943	1	*	-62.856228984548856	chr6	48463860	48464012	153	+	exon:272130	ENSMUST00000212740.1	243369	Sspo	mm10_genes_exons	chr6:48463943
chr1	134142644	134142644	1	*	73.73916475561447	chr1	134140290	134143239	2950	+	intron:14638	ENSMUST00000159963.7	71884	Chit1	mm10_genes_introns	chr1:134142644
chr14	31383779	31383779	1	*	-58.40947785924078	chr14	31379520	31387718	8199	-	intron:533862	ENSMUST00000140002.7	24056	Sh3bp5	mm10_genes_introns	chr14:31383779
chr10	81364145	81364145	1	*	78.73911395107869	chr10	81363770	81366225	2456	+	exon:477883	ENSMUST00000044844.8	73822	Mfsd12	mm10_genes_exons	chr10:81364145
chr15	79120747	79120747	1	*	-64.65182414872872	chr15	79120052	79124051	4000	+	1to5kb:111624	ENSMUST00000229694.1	27008	Micall1	mm10_genes_1to5kb	chr15:79120747
chr1	46619847	46619847	1	*	-75.29042992013558	chr1	46615397	46625934	10538	+	intron:4319	ENSMUST00000189749.6	100101919	Dnah7c	mm10_genes_introns	chr1:46619847
chr2	113182575	113182575	1	*	-67.98587211768202	chr2	113028696	113216939	188244	-	intron:91314	ENSMUST00000208151.1	20192	Ryr3	mm10_genes_introns	chr2:113182575
chr10	119818323	119818323	1	*	-66.54840237920332	chr10	119814389	119818388	4000	+	1to5kb:81040	ENSMUST00000105262.8	74053	Grip1	mm10_genes_1to5kb	chr10:119818323
chr10	119818333	119818333	1	*	-66.54840237920332	chr10	119814389	119818388	4000	+	1to5kb:81040	ENSMUST00000105262.8	74053	Grip1	mm10_genes_1to5kb	chr10:119818333
chr4	137903175	137903175	1	*	65.51218338191305	chr4	137862382	137905069	42688	+	intron:150754	ENSMUST00000102518.9	230857	Ece1	mm10_genes_introns	chr4:137903175
chr13	42903894	42903894	1	*	60.08588427075969	chr13	42709851	42956616	246766	+	intron:496323	ENSMUST00000128646.7	218194	Phactr1	mm10_genes_introns	chr13:42903894
chr5	125155106	125155106	1	*	65.78747199407272	chr5	125124981	125178996	54016	-	intron:216672	ENSMUST00000111402.8	20602	Ncor2	mm10_genes_introns	chr5:125155106
chr6	39351931	39351931	1	*	-64.97526868278382	chr6	39348987	39352986	4000	-	1to5kb:47872	ENSMUST00000202714.3	72144	Slc37a3	mm10_genes_1to5kb	chr6:39351931
chr14	39043424	39043424	1	*	-57.72247955858265	chr14	39012099	39471971	459873	-	intron:534818	ENSMUST00000166968.8	18183	Nrg3	mm10_genes_introns	chr14:39043424
chr2	119322943	119322943	1	*	-65.8449349181498	chr2	119320784	119324783	4000	+	1to5kb:11903	ENSMUST00000102517.3	54485	Dll4	mm10_genes_1to5kb	chr2:119322943
chr16	38965891	38965891	1	*	-55.95724936171641	chr16	38901648	39007133	105486	+	intron:579116	ENSMUST00000114706.7	207683	Igsf11	mm10_genes_introns	chr16:38965891
chr7	79729869	79729869	1	*	53.555739974703286	chr7	79729866	79730865	1000	-	promoter:60598	ENSMUST00000206083.1	103968	Plin1	mm10_genes_promoters	chr7:79729869
chr13	108188229	108188229	1	*	-67.73821042270916	chr13	108187281	108194055	6775	+	intron:502045	ENSMUST00000123657.7	71991	Ercc8	mm10_genes_introns	chr13:108188229
chr4	129981760	129981760	1	*	-55.11571690249275	chr4	129979870	129983869	4000	+	1to5kb:29082	ENSMUST00000120204.7	230775	Adgrb2	mm10_genes_1to5kb	chr4:129981760
chr9	64387442	64387442	1	*	-51.95285408315956	chr9	64385829	64501522	115694	+	intron:354579	ENSMUST00000093829.8	214058	Megf11	mm10_genes_introns	chr9:64387442
chr16	34211271	34211271	1	*	-54.36795558776733	chr16	34205331	34212157	6827	-	intron:588693	ENSMUST00000076810.11	545156	Kalrn	mm10_genes_introns	chr16:34211271
chr8	71397471	71397471	1	*	-66.87351046847692	chr8	71397422	71398421	1000	+	promoter:65140	ENSMUST00000213093.1	68251	Babam1	mm10_genes_promoters	chr8:71397471
chr1	155587806	155587806	1	*	-57.842693529627695	chr1	155567682	155601453	33772	+	intron:16788	ENSMUST00000035560.8	72482	Acbd6	mm10_genes_introns	chr1:155587806
chr1	182488269	182488269	1	*	-70.99883155544575	chr1	182487790	182488993	1204	-	intron:42760	ENSMUST00000068505.9	12334	Capn2	mm10_genes_introns	chr1:182488269
chr11	5726591	5726591	1	*	62.73965263935091	chr11	5726419	5726830	412	-	intron:445736	ENSMUST00000093362.11	72046	Urgcp	mm10_genes_introns	chr11:5726591
chr3	55054767	55054767	1	*	-72.91083211599205	chr3	55054242	55055241	1000	+	promoter:20339	ENSMUST00000199770.1	70970	4931419H13Rik	mm10_genes_promoters	chr3:55054767
chr17	47730706	47730706	1	*	66.84212749762452	chr17	47730599	47730798	200	+	exon:730566	ENSMUST00000024782.11	109820	Pgc	mm10_genes_exons	chr17:47730706
chr5	134945802	134945802	1	*	66.2432468002143	chr5	134945119	134946934	1816	-	exon:261176	ENSMUST00000051401.3	12740	Cldn4	mm10_genes_exons	chr5:134945802
chr11	116545112	116545112	1	*	58.44596882256281	chr11	116545018	116549017	4000	-	1to5kb:92987	ENSMUST00000134102.1	217342	Ube2o	mm10_genes_1to5kb	chr11:116545112
chr8	117578480	117578480	1	*	-57.78062457502286	chr8	117577925	117579775	1851	+	intron:329368	ENSMUST00000081232.8	234779	Plcg2	mm10_genes_introns	chr8:117578480
chr13	40732490	40732490	1	*	-59.904326553645205	chr13	40731608	40732607	1000	-	promoter:102369	ENSMUST00000224319.1	21418	Tfap2a	mm10_genes_promoters	chr13:40732490
chr19	38819707	38819707	1	*	-52.803954725216286	chr19	38819238	38820237	1000	-	promoter:134281	ENSMUST00000025963.7	57753	Noc3l	mm10_genes_promoters	chr19:38819707
chr5	66998657	66998657	1	*	-55.17944296301703	chr5	66998647	66998804	158	+	exon:220073	ENSMUST00000101164.10	77569	Limch1	mm10_genes_exons	chr5:66998657
chr7	67714765	67714765	1	*	63.80251486950188	chr7	67711504	67725233	13730	+	intron:270568	ENSMUST00000032774.15	67009	Ttc23	mm10_genes_introns	chr7:67714765
chr1	120486311	120486311	1	*	55.09653191551711	chr1	120485931	120488146	2216	-	intron:33639	ENSMUST00000027639.7	17167	Marco	mm10_genes_introns	chr1:120486311
chr7	44327148	44327148	1	*	66.49303377744108	chr7	44327033	44327226	194	+	exon:319590	ENSMUST00000107938.7	243961	Shank1	mm10_genes_exons	chr7:44327148
chr17	37054236	37054236	1	*	-58.55146804676114	chr17	37050712	37054711	4000	+	1to5kb:122236	ENSMUST00000174866.1	54393	Gabbr1	mm10_genes_1to5kb	chr17:37054236
chr17	37054246	37054246	1	*	-58.55146804676114	chr17	37050712	37054711	4000	+	1to5kb:122236	ENSMUST00000174866.1	54393	Gabbr1	mm10_genes_1to5kb	chr17:37054246
chr15	97285303	97285303	1	*	51.9586991458635	chr15	97279916	97361199	81284	+	intron:553774	ENSMUST00000059433.7	239647	Pced1b	mm10_genes_introns	chr15:97285303
chr15	74588969	74588969	1	*	53.43446765930133	chr15	74588687	74589464	778	+	exon:659761	ENSMUST00000042035.15	107831	Adgrb1	mm10_genes_exons	chr15:74588969
chr7	25694260	25694260	1	*	60.93167606197507	chr7	25694223	25694340	118	+	exon:314893	ENSMUST00000002678.9	21803	Tgfb1	mm10_genes_exons	chr7:25694260
chr1	192759548	192759548	1	*	71.40374017838117	chr1	192748949	192759670	10722	-	intron:43731	ENSMUST00000128619.7	226861	Hhat	mm10_genes_introns	chr1:192759548
chr15	100361111	100361111	1	*	-70.58885279534562	chr15	100359542	100363541	4000	+	1to5kb:112455	ENSMUST00000175683.7	380975	Higd1c	mm10_genes_1to5kb	chr15:100361111
chr7	31035307	31035307	1	*	61.00190935432346	chr7	31035284	31035385	102	-	intron:293526	ENSMUST00000161805.7	18301	Fxyd5	mm10_genes_introns	chr7:31035307
chr7	19744634	19744634	1	*	-66.95673279678762	chr7	19738375	19749214	10840	-	intron:289190	ENSMUST00000075447.13	19294	Nectin2	mm10_genes_introns	chr7:19744634
chr5	147580713	147580713	1	*	-53.52716564661066	chr5	147580425	147582102	1678	-	intron:222294	ENSMUST00000031653.11	14254	Flt1	mm10_genes_introns	chr5:147580713
chr16	26954083	26954083	1	*	53.282376885239266	chr16	26943676	26962893	19218	-	intron:587648	ENSMUST00000231417.1	239789	Gmnc	mm10_genes_introns	chr16:26954083
chr8	120437354	120437354	1	*	-56.36378538028005	chr8	120354180	120553583	199404	+	intron:329782	ENSMUST00000180448.2	382034	Gse1	mm10_genes_introns	chr8:120437354
chr10	119818314	119818314	1	*	-66.50114022640614	chr10	119814389	119818388	4000	+	1to5kb:81040	ENSMUST00000105262.8	74053	Grip1	mm10_genes_1to5kb	chr10:119818314
chr15	74588953	74588953	1	*	58.771056314302264	chr15	74588687	74589464	778	+	exon:659761	ENSMUST00000042035.15	107831	Adgrb1	mm10_genes_exons	chr15:74588953
chr11	88134460	88134460	1	*	-62.60439805058135	chr11	88099344	88169564	70221	+	intron:435841	ENSMUST00000018522.12	103841	Cuedc1	mm10_genes_introns	chr11:88134460
chr5	92373952	92373952	1	*	74.64327331966324	chr5	92371975	92375974	4000	+	1to5kb:36252	ENSMUST00000120781.7	109979	Art3	mm10_genes_1to5kb	chr5:92373952
chr2	30253127	30253127	1	*	61.10415294177789	chr2	30237806	30255167	17362	+	intron:49657	ENSMUST00000113654.7	241296	Lrrc8a	mm10_genes_introns	chr2:30253127
chr14	31186799	31186799	1	*	-73.48502787875282	chr14	31186323	31190322	4000	-	1to5kb:108106	ENSMUST00000170436.7	64652	Nisch	mm10_genes_1to5kb	chr14:31186799
chr18	35740601	35740601	1	*	62.43062940981877	chr18	35740463	35741462	1000	-	promoter:129616	ENSMUST00000235495.1	72512	Tmem173	mm10_genes_promoters	chr18:35740601
chr3	122322486	122322486	1	*	-76.2860844544725	chr3	122321725	122326757	5033	+	intron:116533	ENSMUST00000196134.1	29815	Bcar3	mm10_genes_introns	chr3:122322486
chr17	46453379	46453379	1	*	-48.94150927949287	chr17	46447718	46467125	19408	-	intron:624834	ENSMUST00000047034.8	106763	Ttbk1	mm10_genes_introns	chr17:46453379
chr17	26933699	26933699	1	*	57.994839734602955	chr17	26930472	26934471	4000	+	1to5kb:120989	ENSMUST00000184739.1	102465584	Mir6968	mm10_genes_1to5kb	chr17:26933699
chr6	113759315	113759315	1	*	-67.26082537278518	chr6	113759123	113759334	212	-	exon:300879	ENSMUST00000101045.9	11941	Atp2b2	mm10_genes_exons	chr6:113759315
chr9	37324183	37324183	1	*	-79.32538212780359	chr9	37320511	37342435	21925	-	intron:371012	ENSMUST00000037275.5	245902	Ccdc15	mm10_genes_introns	chr9:37324183
chr19	56326504	56326504	1	*	54.566451320309774	chr19	56321017	56328995	7979	-	intron:670206	ENSMUST00000167239.7	18175	Nrap	mm10_genes_introns	chr19:56326504
chr8	120520480	120520480	1	*	-67.78534874593318	chr8	120354180	120553583	199404	+	intron:329782	ENSMUST00000180448.2	382034	Gse1	mm10_genes_introns	chr8:120520480
chrX	111895169	111895169	1	*	54.88869055450232	chrX	111891558	111896757	5200	+	intron:678933	ENSMUST00000207962.1	71030	4933403O08Rik	mm10_genes_introns	chrX:111895169
chr5	115095103	115095103	1	*	73.74190991318639	chr5	115095051	115095250	200	+	exon:227847	ENSMUST00000031530.8	74585	Sppl3	mm10_genes_exons	chr5:115095103
chr18	12989903	12989903	1	*	50.293779666167204	chr18	12989880	12990492	613	+	intron:631710	ENSMUST00000025290.6	16210	Impact	mm10_genes_introns	chr18:12989903
chr14	66005012	66005012	1	*	70.66516732906027	chr14	66004177	66005836	1660	-	intron:539761	ENSMUST00000059970.8	268756	Gulo	mm10_genes_introns	chr14:66005012
chr13	55210058	55210058	1	*	62.024591166089024	chr13	55209735	55210734	1000	+	promoter:100030	ENSMUST00000224156.1	18193	Nsd1	mm10_genes_promoters	chr13:55210058
chr11	117781354	117781354	1	*	49.314305841786926	chr11	117781076	117782075	1000	+	promoter:88672	ENSMUST00000127080.7	217356	Tmc8	mm10_genes_promoters	chr11:117781354
chr13	38609616	38609616	1	*	-66.48809163171457	chr13	38593433	38612642	19210	-	intron:506368	ENSMUST00000224115.1	17828	Bloc1s5	mm10_genes_introns	chr13:38609616
chr1	91499600	91499600	1	*	-63.02999331592103	chr1	91499502	91499663	162	+	exon:13331	ENSMUST00000189341.6	74019	Traf3ip1	mm10_genes_exons	chr1:91499600
chr11	75167306	75167306	1	*	-50.350778069293575	chr11	75164565	75167544	2980	-	exon:547049	ENSMUST00000055619.4	15248	Hic1	mm10_genes_exons	chr11:75167306
chr3	142061705	142061705	1	*	-52.02544091007544	chr3	141880517	142078125	197609	-	intron:133504	ENSMUST00000098568.7	12167	Bmpr1b	mm10_genes_introns	chr3:142061705
chr4	40509855	40509855	1	*	60.6742297163848	chr4	40491724	40521745	30022	-	intron:157135	ENSMUST00000146043.1	71293	4933428C19Rik	mm10_genes_introns	chr4:40509855
chr1	42956273	42956273	1	*	-51.426950596654365	chr1	42953234	43031951	78718	+	intron:3662	ENSMUST00000179766.2	93690	Gpr45	mm10_genes_introns	chr1:42956273
chr2	31423173	31423173	1	*	-65.12151719902634	chr2	31423090	31423356	267	+	exon:60061	ENSMUST00000113532.8	665700	Hmcn2	mm10_genes_exons	chr2:31423173
chr1	134217169	134217169	1	*	64.80868669017032	chr1	134203591	134234014	30424	-	intron:35479	ENSMUST00000169927.1	11539	Adora1	mm10_genes_introns	chr1:134217169
chrX	168674174	168674174	1	*	73.70025471127528	chrX	168673899	168674898	1000	-	promoter:140023	ENSMUST00000033725.15	17692	Msl3	mm10_genes_promoters	chrX:168674174
chr4	119136369	119136369	1	*	56.592601581508326	chr4	119136246	119137983	1738	+	exon:175128	ENSMUST00000030398.9	20525	Slc2a1	mm10_genes_exons	chr4:119136369
chr17	48476937	48476937	1	*	-61.63910823393917	chr17	48465030	48522678	57649	+	intron:608139	ENSMUST00000162313.7	76589	Unc5cl	mm10_genes_introns	chr17:48476937
chr5	35873221	35873221	1	*	-52.9022279085266	chr5	35873170	35873224	55	+	exon:217283	ENSMUST00000054598.11	231148	Ablim2	mm10_genes_exons	chr5:35873221
chr15	64026639	64026639	1	*	-48.15171723044145	chr15	63970969	64060194	89226	-	intron:559763	ENSMUST00000063838.10	223601	Fam49b	mm10_genes_introns	chr15:64026639
chr16	30353254	30353254	1	*	57.210588817364474	chr16	30352400	30354231	1832	-	intron:587972	ENSMUST00000061350.12	224088	Atp13a3	mm10_genes_introns	chr16:30353254
chr18	56497180	56497180	1	*	57.60460640600438	chr18	56492000	56497319	5320	+	intron:636012	ENSMUST00000237355.1	107022	Gramd3	mm10_genes_introns	chr18:56497180
chr3	88823964	88823964	1	*	64.46046688047441	chr3	88819645	88825414	5770	-	exon:150264	ENSMUST00000183707.1	319830	1500004A13Rik	mm10_genes_exons	chr3:88823964
chr7	131972129	131972129	1	*	-55.131396159084154	chr7	131967596	131974276	6681	+	intron:281957	ENSMUST00000045840.4	233919	Gpr26	mm10_genes_introns	chr7:131972129
chr9	14818057	14818057	1	*	-60.39417198046046	chr9	14816970	14819415	2446	+	intron:346829	ENSMUST00000034405.10	17535	Mre11a	mm10_genes_introns	chr9:14818057
chr18	42715190	42715190	1	*	59.32577179059145	chr18	42701648	42731786	30139	-	intron:643891	ENSMUST00000136118.7	72930	Ppp2r2b	mm10_genes_introns	chr18:42715190
chr4	143361724	143361724	1	*	58.30050411447495	chr4	143350812	143369763	18952	+	intron:152314	ENSMUST00000052458.2	242735	Lrrc38	mm10_genes_introns	chr4:143361724
chr9	122601434	122601434	1	*	-51.19554454471411	chr9	122576983	122673077	96095	+	intron:366409	ENSMUST00000181682.8	319626	9530059O14Rik	mm10_genes_introns	chr9:122601434
chr14	75502564	75502564	1	*	-50.49565053235761	chr14	75456191	75525445	69255	+	intron:527709	ENSMUST00000164848.2	380918	Siah3	mm10_genes_introns	chr14:75502564
chr4	106727977	106727977	1	*	53.65403571602134	chr4	106727931	106728930	1000	-	promoter:31970	ENSMUST00000106770.7	381538	Mroh7	mm10_genes_promoters	chr4:106727977
chr1	134108955	134108955	1	*	57.13473654754077	chr1	134106242	134110241	4000	+	1to5kb:2711	ENSMUST00000159963.7	71884	Chit1	mm10_genes_1to5kb	chr1:134108955
chr4	140849408	140849408	1	*	-48.267455877201684	chr4	140846779	140850778	4000	-	1to5kb:33417	ENSMUST00000026378.3	18599	Padi1	mm10_genes_1to5kb	chr4:140849408
chr14	117891728	117891728	1	*	-59.1441273648655	chr14	117888666	117951137	62472	+	intron:528762	ENSMUST00000088483.9	23888	Gpc6	mm10_genes_introns	chr14:117891728
chr9	44711721	44711721	1	*	54.03384901606323	chr9	44710947	44711946	1000	-	promoter:75344	ENSMUST00000154723.2	102693	Phldb1	mm10_genes_promoters	chr9:44711721
chr8	95239408	95239408	1	*	75.7765724231451	chr8	95239045	95241481	2437	-	exon:410549	ENSMUST00000119870.8	333329	Cngb1	mm10_genes_exons	chr8:95239408
chr7	19295149	19295149	1	*	-60.46833099431939	chr7	19294466	19295450	985	+	intron:261332	ENSMUST00000032559.16	20167	Rtn2	mm10_genes_introns	chr7:19295149
chr5	135177188	135177188	1	*	-55.605536241591544	chr5	135174582	135178581	4000	+	1to5kb:37867	ENSMUST00000145329.1	12054	Bcl7b	mm10_genes_1to5kb	chr5:135177188
chr14	19949576	19949576	1	*	55.8387852461772	chr14	19891402	19960653	69252	-	intron:530350	ENSMUST00000160013.7	14702	Gng2	mm10_genes_introns	chr14:19949576
chr9	62708134	62708134	1	*	-58.22721269315737	chr9	62696996	62727605	30610	+	intron:354381	ENSMUST00000034774.8	319480	Itga11	mm10_genes_introns	chr9:62708134
chr2	60673555	60673555	1	*	58.35445355503956	chr2	60673463	60673711	249	-	5UTR:10394	ENSMUST00000059888.14	16420	Itgb6	mm10_genes_5UTRs	chr2:60673555
chr9	37576802	37576802	1	*	-55.0843367498066	chr9	37558223	37616799	58577	+	intron:349793	ENSMUST00000213126.1	22619	Siae	mm10_genes_introns	chr9:37576802
chr15	12859413	12859413	1	*	-59.45363108128897	chr15	12859373	12859459	87	+	exon:655732	ENSMUST00000169061.7	14000	Drosha	mm10_genes_exons	chr15:12859413
chr13	113815842	113815842	1	*	71.62385499699438	chr13	113794697	113922246	127550	+	intron:502764	ENSMUST00000091201.6	218639	Arl15	mm10_genes_introns	chr13:113815842
chr2	33625335	33625335	1	*	-61.27596897079726	chr2	33569283	33639488	70206	-	intron:78974	ENSMUST00000041730.10	16917	Lmx1b	mm10_genes_introns	chr2:33625335
chr4	135139088	135139088	1	*	65.17626317839917	chr4	135121164	135152787	31624	+	intron:149935	ENSMUST00000056977.13	12399	Runx3	mm10_genes_introns	chr4:135139088
chr4	117122137	117122137	1	*	55.423253973285604	chr4	117121266	117122265	1000	-	promoter:32284	ENSMUST00000153303.1	78611	Btbd19	mm10_genes_promoters	chr4:117122137
chr12	105005140	105005140	1	*	60.36664073140735	chr12	104975896	105009713	33818	-	intron:491601	ENSMUST00000067005.10	212073	Syne3	mm10_genes_introns	chr12:105005140
chr17	73805772	73805772	1	*	44.19629174016417	chr17	73805470	73816230	10761	+	intron:610792	ENSMUST00000024860.8	57440	Ehd3	mm10_genes_introns	chr17:73805772
chr5	122019613	122019613	1	*	68.82688691282932	chr5	121924916	122043769	118854	-	intron:214778	ENSMUST00000111752.9	13048	Cux2	mm10_genes_introns	chr5:122019613
chr4	123679189	123679189	1	*	51.95779256136747	chr4	123554366	123683969	129604	-	intron:166795	ENSMUST00000097897.10	11426	Macf1	mm10_genes_introns	chr4:123679189
chr16	96761500	96761500	1	*	-55.6299619406788	chr16	96718180	96772404	54225	-	intron:593734	ENSMUST00000056102.8	13508	Dscam	mm10_genes_introns	chr16:96761500
chrX	48519879	48519879	1	*	60.96317868137332	chrX	48519859	48529648	9790	+	intron:674517	ENSMUST00000033430.2	19337	Rab33a	mm10_genes_introns	chrX:48519879
chr2	32169210	32169210	1	*	-74.36560274650981	chr2	32151292	32182457	31166	+	intron:50792	ENSMUST00000036691.13	227723	Prrc2b	mm10_genes_introns	chr2:32169210
chr8	70331318	70331318	1	*	-50.03329062225871	chr8	70330699	70331592	894	+	exon:385634	ENSMUST00000165819.8	14559	Gdf1	mm10_genes_exons	chr8:70331318
chr2	49690480	49690480	1	*	-61.73215660367738	chr2	49688758	49693693	4936	+	intron:52747	ENSMUST00000028102.13	16574	Kif5c	mm10_genes_introns	chr2:49690480
chr5	53110380	53110380	1	*	49.01234638724104	chr5	53108175	53116162	7988	-	intron:205758	ENSMUST00000031090.7	231238	Sel1l3	mm10_genes_introns	chr5:53110380
chr11	88139380	88139380	1	*	61.56439221737487	chr11	88099344	88169564	70221	+	intron:435841	ENSMUST00000018522.12	103841	Cuedc1	mm10_genes_introns	chr11:88139380
chr1	136334912	136334912	1	*	-57.44460487482387	chr1	136324997	136345298	20302	-	intron:36314	ENSMUST00000048309.11	67886	Camsap2	mm10_genes_introns	chr1:136334912
chr4	148834114	148834114	1	*	-70.58715966438926	chr4	148804515	148838265	33751	+	intron:152927	ENSMUST00000094464.9	69743	Casz1	mm10_genes_introns	chr4:148834114
chr6	83375768	83375768	1	*	-66.58595500801925	chr6	83375750	83375900	151	-	exon:296894	ENSMUST00000089622.10	194388	Tet3	mm10_genes_exons	chr6:83375768
chr1	91800481	91800481	1	*	-52.790096677761255	chr1	91800461	91801460	1000	+	promoter:2059	ENSMUST00000007949.3	13345	Twist2	mm10_genes_promoters	chr1:91800481
chr14	18240318	18240318	1	*	58.60048769187802	chr14	18240128	18244127	4000	-	1to5kb:107670	ENSMUST00000090543.5	353187	Nr1d2	mm10_genes_1to5kb	chr14:18240318
chr6	127081329	127081329	1	*	74.56755527747477	chr6	127080038	127081408	1371	+	exon:285672	ENSMUST00000000186.8	64654	Fgf23	mm10_genes_exons	chr6:127081329
chr9	66218525	66218525	1	*	-75.48529976651103	chr9	66215747	66219746	4000	+	1to5kb:72057	ENSMUST00000132987.7	13143	Dapk2	mm10_genes_1to5kb	chr9:66218525
chr10	76727503	76727503	1	*	-68.0625938490193	chr10	76727169	76731168	4000	-	1to5kb:82926	ENSMUST00000001147.4	12833	Col6a1	mm10_genes_1to5kb	chr10:76727503
chr5	115470981	115470981	1	*	68.72635714612929	chr5	115470942	115474508	3567	+	intron:190970	ENSMUST00000145785.7	18778	Pla2g1b	mm10_genes_introns	chr5:115470981
chr5	131904645	131904645	1	*	61.4969935758978	chr5	131770790	132030989	260200	-	intron:217533	ENSMUST00000161226.8	319974	Auts2	mm10_genes_introns	chr5:131904645
chr9	60545981	60545981	1	*	-56.67308605807657	chr9	60545883	60546882	1000	-	promoter:75968	ENSMUST00000216749.1	100504561	9230112J17Rik	mm10_genes_promoters	chr9:60545981
chr7	143738396	143738396	1	*	-60.89347419435971	chr7	143715823	143740269	24447	-	intron:312585	ENSMUST00000119499.7	79196	Osbpl5	mm10_genes_introns	chr7:143738396
chr7	143753366	143753366	1	*	53.614033230287326	chr7	143715823	143756935	41113	-	intron:312614	ENSMUST00000134056.1	79196	Osbpl5	mm10_genes_introns	chr7:143753366
chrX	48623722	48623722	1	*	66.83192238750782	chrX	48622749	48623748	1000	+	promoter:135616	ENSMUST00000153047.7	20523	Slc25a14	mm10_genes_promoters	chrX:48623722
chr18	36960502	36960502	1	*	68.32121356210126	chr18	36960440	36962785	2346	+	exon:762198	ENSMUST00000192168.1	12941	Pcdha5	mm10_genes_exons	chr18:36960502
chr2	41243497	41243497	1	*	-63.14362255651018	chr2	41193679	41245939	52261	-	intron:80415	ENSMUST00000052550.12	94217	Lrp1b	mm10_genes_introns	chr2:41243497
chr7	45643038	45643038	1	*	-59.6925846443052	chr7	45639384	45643383	4000	+	1to5kb:53438	ENSMUST00000210169.1	74490	Mamstr	mm10_genes_1to5kb	chr7:45643038
chr3	105568711	105568711	1	*	46.71500442191121	chr3	105459922	105658610	198689	+	intron:115076	ENSMUST00000098761.9	56543	Kcnd3	mm10_genes_introns	chr3:105568711
chr7	44864849	44864849	1	*	-55.53984849709749	chr7	44863974	44864973	1000	-	promoter:59422	ENSMUST00000208687.1	84113	Ptov1	mm10_genes_promoters	chr7:44864849
chr10	81241735	81241735	1	*	-49.622484038680206	chr10	81239934	81242417	2484	+	exon:477560	ENSMUST00000128182.7	103406	Zfr2	mm10_genes_exons	chr10:81241735
chr5	37124755	37124755	1	*	52.533424205363865	chr5	37123343	37124876	1534	+	intron:182320	ENSMUST00000043794.10	76071	Jakmip1	mm10_genes_introns	chr5:37124755
chr8	117278877	117278877	1	*	-51.76771016229177	chr8	117257402	117377074	119673	+	intron:329295	ENSMUST00000166750.8	74440	Cmip	mm10_genes_introns	chr8:117278877
chr13	49073369	49073369	1	*	-57.28568095182427	chr13	49072016	49076015	4000	-	1to5kb:102565	ENSMUST00000159633.1	75607	Wnk2	mm10_genes_1to5kb	chr13:49073369
chr11	119997549	119997549	1	*	-62.289319893754765	chr11	119996671	119997670	1000	+	promoter:88791	ENSMUST00000131580.1	108100	Baiap2	mm10_genes_promoters	chr11:119997549
chr2	105373553	105373553	1	*	57.04302430635104	chr2	105297969	105378629	80661	+	intron:58766	ENSMUST00000068813.2	74088	Them7	mm10_genes_introns	chr2:105373553
chr10	42269325	42269325	1	*	-65.05045378334704	chr10	42197902	42274815	76914	-	intron:407569	ENSMUST00000105502.7	56484	Foxo3	mm10_genes_introns	chr10:42269325
chrX	161717129	161717129	1	*	58.02732143469292	chrX	161716627	161717626	1000	+	promoter:137442	ENSMUST00000061514.7	24004	Rai2	mm10_genes_promoters	chrX:161717129
chr4	41507793	41507793	1	*	-71.38879957080675	chr4	41507755	41508754	1000	-	promoter:30764	ENSMUST00000123356.7	73721	1110017D15Rik	mm10_genes_promoters	chr4:41507793
chr9	14818043	14818043	1	*	-58.669886712196075	chr9	14816970	14819415	2446	+	intron:346829	ENSMUST00000034405.10	17535	Mre11a	mm10_genes_introns	chr9:14818043
chr18	36032516	36032516	1	*	51.15044102232267	chr18	36031942	36032941	1000	-	promoter:129629	ENSMUST00000115712.9	100042150	Nrg2	mm10_genes_promoters	chr18:36032516
chr9	35552689	35552689	1	*	56.41584306748422	chr9	35551463	35552836	1374	-	intron:370645	ENSMUST00000034612.6	30959	Ddx25	mm10_genes_introns	chr9:35552689
chr3	95036699	95036699	1	*	-64.87547126367485	chr3	95036268	95040267	4000	-	1to5kb:24828	ENSMUST00000140348.7	19185	Psmd4	mm10_genes_1to5kb	chr3:95036699
chr8	70785593	70785593	1	*	-73.33547645409955	chr8	70784489	70788488	4000	-	1to5kb:68394	ENSMUST00000212140.1	546071	Mast3	mm10_genes_1to5kb	chr8:70785593
chr11	118525205	118525205	1	*	65.55511468367324	chr11	118513405	118670648	157244	-	intron:467729	ENSMUST00000117731.7	52897	Rbfox3	mm10_genes_introns	chr11:118525205
chr9	57402559	57402559	1	*	-55.65912121426142	chr9	57398846	57420162	21317	-	intron:375178	ENSMUST00000215961.1	66812	Ppcdc	mm10_genes_introns	chr9:57402559
chr10	92916882	92916882	1	*	-44.6305180815302	chr10	92908887	92921320	12434	-	intron:415733	ENSMUST00000168110.7	380654	Cfap54	mm10_genes_introns	chr10:92916882
chr18	32365285	32365285	1	*	-64.58441628564076	chr18	32359436	32371429	11994	-	intron:642446	ENSMUST00000234930.1	402767	A830052D11Rik	mm10_genes_introns	chr18:32365285
chr8	107000659	107000659	1	*	-57.207319620305086	chr8	106997209	107001509	4301	+	intron:327834	ENSMUST00000212524.1	20650	Sntb2	mm10_genes_introns	chr8:107000659
chr11	119630833	119630833	1	*	-54.492170555981	chr11	119603972	119657663	53692	+	intron:443368	ENSMUST00000125583.7	74370	Rptor	mm10_genes_introns	chr11:119630833
chr7	45466019	45466019	1	*	72.85251523074886	chr7	45465977	45466123	147	-	exon:356804	ENSMUST00000211365.1	12028	Bax	mm10_genes_exons	chr7:45466019
chr9	63723546	63723546	1	*	-57.408596334464534	chr9	63667923	63757471	89549	-	intron:376488	ENSMUST00000034973.9	17127	Smad3	mm10_genes_introns	chr9:63723546
chr15	99696617	99696617	1	*	63.806139049785536	chr15	99696512	99696662	151	+	exon:666904	ENSMUST00000023758.8	11419	Asic1	mm10_genes_exons	chr15:99696617
chr2	31495938	31495938	1	*	-51.16701154413257	chr2	31493176	31498146	4971	+	intron:50463	ENSMUST00000102840.4	11898	Ass1	mm10_genes_introns	chr2:31495938
chr5	139798547	139798547	1	*	58.343440419383484	chr5	139791713	139799138	7426	+	intron:196972	ENSMUST00000018287.9	17135	Mafk	mm10_genes_introns	chr5:139798547
chr6	121055898	121055898	1	*	64.51203692785583	chr6	121042335	121081408	39074	-	intron:253680	ENSMUST00000207889.1	194401	Mical3	mm10_genes_introns	chr6:121055898
chr5	128782011	128782011	1	*	-56.91796978067891	chr5	128781841	128782551	711	-	exon:259308	ENSMUST00000238334.1	231760	Rimbp2	mm10_genes_exons	chr5:128782011
chr6	135019796	135019796	1	*	63.85033833083663	chr6	135018974	135021578	2605	+	exon:286454	ENSMUST00000155277.7	67755	Ddx47	mm10_genes_exons	chr6:135019796
chrX	48453832	48453832	1	*	-45.766254893036766	chrX	48424355	48453871	29517	-	intron:686237	ENSMUST00000114958.7	56501	Elf4	mm10_genes_introns	chrX:48453832
chr10	127750341	127750341	1	*	-56.82636285138777	chr10	127747276	127751096	3821	-	exon:503475	ENSMUST00000079692.5	11536	Gpr182	mm10_genes_exons	chr10:127750341
chr6	112825915	112825915	1	*	-77.69977506226196	chr6	112816754	112829438	12685	-	intron:250946	ENSMUST00000088373.10	259302	Srgap3	mm10_genes_introns	chr6:112825915
chr3	79458872	79458872	1	*	48.628123475675956	chr3	79455974	79459741	3768	-	exon:148286	ENSMUST00000133154.6	329679	Fnip2	mm10_genes_exons	chr3:79458872
chr3	127317629	127317629	1	*	-56.30470120401216	chr3	127104863	127339131	234269	-	intron:132171	ENSMUST00000182078.8	109676	Ank2	mm10_genes_introns	chr3:127317629
chr4	41675527	41675527	1	*	60.925555377396144	chr4	41675105	41686796	11692	-	intron:157466	ENSMUST00000102961.9	12804	Cntfr	mm10_genes_introns	chr4:41675527
chr6	87495870	87495870	1	*	-72.88318793822278	chr6	87492266	87495912	3647	-	intron:248691	ENSMUST00000145128.7	232201	Arhgap25	mm10_genes_introns	chr6:87495870
chr7	143738379	143738379	1	*	-59.19304089709095	chr7	143715823	143740269	24447	-	intron:312585	ENSMUST00000119499.7	79196	Osbpl5	mm10_genes_introns	chr7:143738379
chr13	73799700	73799700	1	*	67.54368345441026	chr13	73795941	73799940	4000	+	1to5kb:100578	ENSMUST00000220686.1	20499	Slc12a7	mm10_genes_1to5kb	chr13:73799700
chr5	120626691	120626691	1	*	-52.54634061811607	chr5	120626506	120626833	328	+	intron:192275	ENSMUST00000031598.10	71990	Ddx54	mm10_genes_introns	chr5:120626691
chr3	103802983	103802983	1	*	56.07677968937892	chr3	103800605	103804055	3451	-	exon:154607	ENSMUST00000063502.12	140917	Dclre1b	mm10_genes_exons	chr3:103802983
chr7	16910029	16910029	1	*	55.54446739382464	chr7	16908719	16910905	2187	+	exon:312556	ENSMUST00000086101.5	19222	Ptgir	mm10_genes_exons	chr7:16910029
chrX	48208408	48208408	1	*	-49.67178244762422	chrX	48208329	48209328	1000	-	promoter:138179	ENSMUST00000132652.7	208884	Zdhhc9	mm10_genes_promoters	chrX:48208408
chr7	29059821	29059821	1	*	56.44659511697843	chr7	29059802	29060134	333	-	exon:350061	ENSMUST00000214374.1	20190	Ryr1	mm10_genes_exons	chr7:29059821
chrX	48623743	48623743	1	*	62.37066758588781	chrX	48622749	48623748	1000	+	promoter:135616	ENSMUST00000153047.7	20523	Slc25a14	mm10_genes_promoters	chrX:48623743
chr15	30467376	30467376	1	*	59.119935572666094	chr15	30332147	30480781	148635	+	intron:545769	ENSMUST00000081728.6	18163	Ctnnd2	mm10_genes_introns	chr15:30467376
chr16	10520895	10520895	1	*	-56.36182850837101	chr16	10518387	10520967	2581	+	intron:571968	ENSMUST00000230395.1	12265	Ciita	mm10_genes_introns	chr16:10520895
chr14	117454741	117454741	1	*	51.33713188659139	chr14	117436044	117624384	188341	+	intron:528755	ENSMUST00000123239.1	23888	Gpc6	mm10_genes_introns	chr14:117454741
chr12	98678375	98678375	1	*	59.63779696046991	chr12	98676741	98678678	1938	-	exon:588260	ENSMUST00000170188.7	24000	Ptpn21	mm10_genes_exons	chr12:98678375
chr15	6791872	6791872	1	*	61.0198628387445	chr15	6791827	6793973	2147	+	intron:544392	ENSMUST00000061656.7	78757	Rictor	mm10_genes_introns	chr15:6791872
chr11	58946066	58946066	1	*	55.073845477675356	chr11	58943920	58947919	4000	+	1to5kb:85891	ENSMUST00000078267.4	78303	H2bu2	mm10_genes_1to5kb	chr11:58946066
chr2	31887496	31887496	1	*	59.15939000807461	chr2	31887291	31887743	453	+	exon:60441	ENSMUST00000138325.7	23928	Lamc3	mm10_genes_exons	chr2:31887496
chr5	31194074	31194074	1	*	-52.35558458351976	chr5	31193843	31194842	1000	+	promoter:34844	ENSMUST00000202743.3	266781	Snx17	mm10_genes_promoters	chr5:31194074
chr6	125372928	125372928	1	*	56.091849304605404	chr6	125372813	125372962	150	-	exon:305350	ENSMUST00000042647.6	213522	Plekhg6	mm10_genes_exons	chr6:125372928
chr1	135172371	135172371	1	*	-55.02999052247182	chr1	135168682	135172681	4000	-	1to5kb:6890	ENSMUST00000027682.8	171469	Gpr37l1	mm10_genes_1to5kb	chr1:135172371
chr3	120866226	120866226	1	*	74.92942910073535	chr3	120799748	120886512	86765	-	intron:131573	ENSMUST00000182124.7	320739	6530403H02Rik	mm10_genes_introns	chr3:120866226
chr13	42956789	42956789	1	*	-47.8117400244467	chr13	42956617	42958901	2285	+	exon:596039	ENSMUST00000132050.1	218194	Phactr1	mm10_genes_exons	chr13:42956789
chr1	86060528	86060528	1	*	68.73970783520961	chr1	86059387	86063386	4000	+	1to5kb:1751	ENSMUST00000147807.7	70247	Psmd1	mm10_genes_1to5kb	chr1:86060528
chr14	30943105	30943105	1	*	-59.95060583377392	chr14	30942915	30943158	244	-	intron:533320	ENSMUST00000006704.16	16424	Itih1	mm10_genes_introns	chr14:30943105
chr14	77151795	77151795	1	*	50.82000874505261	chr14	77151763	77155762	4000	+	1to5kb:106984	ENSMUST00000022589.8	239188	Enox1	mm10_genes_1to5kb	chr14:77151795
chr9	107479709	107479709	1	*	-40.98389632373033	chr9	107465670	107497459	31790	+	intron:360917	ENSMUST00000010210.12	56808	Cacna2d2	mm10_genes_introns	chr9:107479709
chr2	52619271	52619271	1	*	50.570105488759665	chr2	52477812	52675727	197916	-	intron:81762	ENSMUST00000178799.7	12298	Cacnb4	mm10_genes_introns	chr2:52619271
chr15	78175109	78175109	1	*	-61.96789784743877	chr15	78174474	78178473	4000	-	1to5kb:114092	ENSMUST00000230844.1	67042	Ift27	mm10_genes_1to5kb	chr15:78175109
chr9	22158021	22158021	1	*	-61.034777826843126	chr9	22157732	22158358	627	+	exon:418857	ENSMUST00000123680.1	66268	Pigyl	mm10_genes_exons	chr9:22158021
chr14	10268878	10268878	1	*	-52.71632943640503	chr14	9870176	10421494	551319	-	intron:529752	ENSMUST00000161302.7	14198	Fhit	mm10_genes_introns	chr14:10268878
chr1	87098714	87098714	1	*	64.48130540314581	chr1	87098002	87098964	963	-	exon:37415	ENSMUST00000113270.2	76768	Alpi	mm10_genes_exons	chr1:87098714
chr7	141079824	141079824	1	*	53.417273130285345	chr7	141079760	141079869	110	+	5UTR:38278	ENSMUST00000066873.4	56460	Pkp3	mm10_genes_5UTRs	chr7:141079824
chr18	65078358	65078358	1	*	63.11670290238347	chr18	65078054	65082053	4000	+	1to5kb:128455	ENSMUST00000238376.1	83814	Nedd4l	mm10_genes_1to5kb	chr18:65078358
chr6	122522055	122522055	1	*	-58.366475063670656	chr6	122521499	122522498	1000	+	promoter:46380	ENSMUST00000126357.1	50530	Mfap5	mm10_genes_promoters	chr6:122522055
chr11	63143267	63143267	1	*	-72.66159952281713	chr11	63134521	63151118	16598	+	intron:426853	ENSMUST00000108702.7	18858	Pmp22	mm10_genes_introns	chr11:63143267
chr10	75051012	75051012	1	*	-56.73804009768799	chr10	75050990	75051080	91	+	exon:474323	ENSMUST00000147802.8	76877	Rab36	mm10_genes_exons	chr10:75051012
chr4	82622247	82622247	1	*	-58.986768208855544	chr4	82498770	82705514	206745	-	intron:161685	ENSMUST00000155821.1	18028	Nfib	mm10_genes_introns	chr4:82622247
chr4	125597877	125597877	1	*	63.36951727696376	chr4	125490946	125623480	132535	+	intron:147367	ENSMUST00000030676.7	14807	Grik3	mm10_genes_introns	chr4:125597877
chr10	80953006	80953006	1	*	-62.51635593810023	chr10	80952947	80997991	45045	-	intron:413567	ENSMUST00000099462.7	14708	Gng7	mm10_genes_introns	chr10:80953006
chr13	68638356	68638356	1	*	54.538935402243716	chr13	68631025	68640709	9685	-	intron:511098	ENSMUST00000022013.7	210044	Adcy2	mm10_genes_introns	chr13:68638356
chr1	136232240	136232240	1	*	-53.63002443299734	chr1	136231290	136235289	4000	-	1to5kb:6957	ENSMUST00000150163.7	67313	Inava	mm10_genes_1to5kb	chr1:136232240
chr12	31285779	31285779	1	*	-51.27050496587462	chr12	31285747	31287415	1669	+	intron:472271	ENSMUST00000169088.7	16777	Lamb1	mm10_genes_introns	chr12:31285779
chr5	123654114	123654114	1	*	56.4718929201838	chr5	123654021	123655893	1873	-	intron:215697	ENSMUST00000111564.7	56430	Clip1	mm10_genes_introns	chr5:123654114
chr8	119823502	119823502	1	*	-64.83873989749492	chr8	119822718	119823717	1000	-	promoter:69648	ENSMUST00000212676.1	72042	Cotl1	mm10_genes_promoters	chr8:119823502
chr15	31311748	31311748	1	*	-55.604105380781235	chr15	31309195	31313194	4000	-	1to5kb:113022	ENSMUST00000227867.1	67434	Ankrd33b	mm10_genes_1to5kb	chr15:31311748
chr4	46952943	46952943	1	*	74.01081119868978	chr4	46875803	46991107	115305	-	intron:158803	ENSMUST00000107749.3	242425	Gabbr2	mm10_genes_introns	chr4:46952943
chr2	71505399	71505399	1	*	52.47158627669237	chr2	71505258	71509257	4000	+	1to5kb:10653	ENSMUST00000138873.7	66559	Metap1d	mm10_genes_1to5kb	chr2:71505399
chr9	29348517	29348517	1	*	-61.602858903465176	chr9	29179255	29411555	232301	-	intron:370193	ENSMUST00000075069.10	235106	Ntm	mm10_genes_introns	chr9:29348517
chr3	55054747	55054747	1	*	-60.06537034918712	chr3	55054242	55055241	1000	+	promoter:20339	ENSMUST00000199770.1	70970	4931419H13Rik	mm10_genes_promoters	chr3:55054747
chr11	6530877	6530877	1	*	-55.78406873603281	chr11	6529767	6533766	4000	-	1to5kb:89193	ENSMUST00000124818.2	100041286	Snhg15	mm10_genes_1to5kb	chr11:6530877
chr4	152283984	152283984	1	*	-57.56101311121511	chr4	152282927	152285337	2411	+	exon:183605	ENSMUST00000105650.7	100129	Gpr153	mm10_genes_exons	chr4:152283984
chr2	164559272	164559272	1	*	-65.66879032838054	chr2	164557413	164561412	4000	+	1to5kb:13455	ENSMUST00000146270.1	67701	Wfdc2	mm10_genes_1to5kb	chr2:164559272
chr7	142327231	142327231	1	*	59.327769014995525	chr7	142325837	142328691	2855	-	exon:375425	ENSMUST00000131791.1	320802	Ifitm10	mm10_genes_exons	chr7:142327231
chr5	135028967	135028967	1	*	-71.87926093802596	chr5	135023611	135037125	13515	+	intron:195076	ENSMUST00000005509.10	20907	Stx1a	mm10_genes_introns	chr5:135028967
chr6	128089271	128089271	1	*	-58.761095131725796	chr6	128034246	128143513	109268	-	intron:255297	ENSMUST00000112173.7	109246	Tspan9	mm10_genes_introns	chr6:128089271
chrX	60547654	60547654	1	*	47.80150555224484	chrX	60321554	60592529	270976	-	intron:687170	ENSMUST00000154051.7	320940	Atp11c	mm10_genes_introns	chrX:60547654
chr1	120604042	120604042	1	*	48.72646431860544	chr1	120603922	120606872	2951	+	intron:13427	ENSMUST00000079721.8	13798	En1	mm10_genes_introns	chr1:120604042
chr15	89556727	89556727	1	*	-70.17611794122313	chr15	89556721	89556748	28	+	exon:665311	ENSMUST00000039074.13	58234	Shank3	mm10_genes_exons	chr15:89556727
chr16	92631810	92631810	1	*	57.0032230328942	chr16	92613761	92644153	30393	-	intron:593017	ENSMUST00000023673.13	12394	Runx1	mm10_genes_introns	chr16:92631810
chr5	139036973	139036973	1	*	-69.06454421478398	chr5	139020138	139037033	16896	-	intron:220700	ENSMUST00000026973.13	19085	Prkar1b	mm10_genes_introns	chr5:139036973
chr14	105599994	105599994	1	*	67.54632524515381	chr14	105593776	105631764	37989	+	intron:528709	ENSMUST00000227407.1	380930	9330188P03Rik	mm10_genes_introns	chr14:105599994
chr17	31114491	31114491	1	*	52.954224411372095	chr17	31114057	31117988	3932	+	exon:723630	ENSMUST00000024829.7	11307	Abcg1	mm10_genes_exons	chr17:31114491
chr11	32278621	32278621	1	*	-67.11139993228792	chr11	32278511	32282510	4000	+	1to5kb:85213	ENSMUST00000093209.3	15122	Hba-a1	mm10_genes_1to5kb	chr11:32278621
chr4	152283949	152283949	1	*	-71.61305799548201	chr4	152282927	152285337	2411	+	exon:183605	ENSMUST00000105650.7	100129	Gpr153	mm10_genes_exons	chr4:152283949
chr11	95510986	95510986	1	*	-72.2454017934935	chr11	95509845	95511532	1688	-	exon:551615	ENSMUST00000058866.7	104079	Nxph3	mm10_genes_exons	chr11:95510986
chr5	135082746	135082746	1	*	-56.861664352552296	chr5	135079267	135083266	4000	-	1to5kb:42326	ENSMUST00000067935.10	194309	Vps37d	mm10_genes_1to5kb	chr5:135082746
chr15	98669301	98669301	1	*	-73.24946085516333	chr15	98669205	98670842	1638	-	exon:683982	ENSMUST00000003451.10	223881	Rnd1	mm10_genes_exons	chr15:98669301
chr2	28667492	28667492	1	*	-62.801378570746046	chr2	28666015	28670014	4000	+	1to5kb:9515	ENSMUST00000125715.1	64930	Tsc1	mm10_genes_1to5kb	chr2:28667492
chr5	125508890	125508890	1	*	-65.53194497291172	chr5	125508493	125509492	1000	+	promoter:37621	ENSMUST00000131355.1	78894	Aacs	mm10_genes_promoters	chr5:125508890
chr7	27380317	27380317	1	*	59.49684749282055	chr7	27375598	27391432	15835	-	intron:290652	ENSMUST00000108362.7	80297	Sptbn4	mm10_genes_introns	chr7:27380317
chr2	91084639	91084639	1	*	-68.42061572983866	chr2	91082524	91099429	16906	+	intron:57271	ENSMUST00000169852.1	20375	Spi1	mm10_genes_introns	chr2:91084639
chr18	74960090	74960090	1	*	62.22713801342774	chr18	74957380	74960877	3498	-	intron:646573	ENSMUST00000066532.4	16891	Lipg	mm10_genes_introns	chr18:74960090
chr6	145380539	145380539	1	*	71.83201458951025	chr6	145379334	145397318	17985	-	intron:257825	ENSMUST00000148739.7	74071	Lmntd1	mm10_genes_introns	chr6:145380539
chr11	76272600	76272600	1	*	59.303779604815986	chr11	76272483	76273970	1488	-	intron:456409	ENSMUST00000021204.3	18230	Nxn	mm10_genes_introns	chr11:76272600
chr15	100316635	100316635	1	*	-53.57569570315711	chr15	100305345	100328217	22873	+	intron:554824	ENSMUST00000229588.1	70152	Mettl7a1	mm10_genes_introns	chr15:100316635
chr19	37602435	37602435	1	*	-35.279061003495116	chr19	37599694	37608925	9232	+	intron:654851	ENSMUST00000238954.1	107371	Exoc6	mm10_genes_introns	chr19:37602435
chr11	72960654	72960654	1	*	-60.35592993159173	chr11	72960169	72961168	1000	+	promoter:86620	ENSMUST00000021142.7	53313	Atp2a3	mm10_genes_promoters	chr11:72960654
chr6	53369407	53369407	1	*	-50.73318418999384	chr6	53287374	53369786	82413	+	intron:228779	ENSMUST00000205222.2	231991	Creb5	mm10_genes_introns	chr6:53369407
chr11	115167791	115167791	1	*	49.17662951538881	chr11	115163952	115176350	12399	+	intron:441199	ENSMUST00000021077.3	26941	Slc9a3r1	mm10_genes_introns	chr11:115167791
chr17	48325792	48325792	1	*	73.48402382721292	chr17	48323937	48327024	3088	+	exon:730720	ENSMUST00000049614.12	320148	B430306N03Rik	mm10_genes_exons	chr17:48325792
chrX	41911373	41911373	1	*	51.39113809646876	chrX	41897851	41911800	13950	-	intron:685907	ENSMUST00000047037.14	331401	Thoc2	mm10_genes_introns	chrX:41911373
chr13	53205400	53205400	1	*	-45.96055094812483	chr13	53146712	53285465	138754	-	intron:507874	ENSMUST00000130235.7	26564	Ror2	mm10_genes_introns	chr13:53205400
chr1	90602386	90602386	1	*	45.4793276964935	chr1	90601981	90602980	1000	+	promoter:1987	ENSMUST00000036153.11	108679	Cops8	mm10_genes_promoters	chr1:90602386
chr10	127655391	127655391	1	*	53.40186065619754	chr10	127651761	127655760	4000	+	1to5kb:81247	ENSMUST00000156231.1	20852	Stat6	mm10_genes_1to5kb	chr10:127655391
chrX	100768310	100768310	1	*	47.56028657590155	chrX	100767722	100768428	707	+	exon:814294	ENSMUST00000000901.12	53310	Dlg3	mm10_genes_exons	chrX:100768310
chr2	153779659	153779659	1	*	-66.70451956802191	chr2	153778931	153779930	1000	+	promoter:12968	ENSMUST00000126656.3	100504221	Efcab8	mm10_genes_promoters	chr2:153779659
chr10	62887465	62887465	1	*	54.877718626195026	chr10	62887325	62888324	1000	-	promoter:82662	ENSMUST00000218438.1	52463	Tet1	mm10_genes_promoters	chr10:62887465
chr12	112663980	112663980	1	*	52.41543353682714	chr12	112660638	112664637	4000	-	1to5kb:98331	ENSMUST00000123563.8	11651	Akt1	mm10_genes_1to5kb	chr12:112663980
chr5	92562628	92562628	1	*	-69.53011508601388	chr5	92562558	92565927	3370	+	intron:187391	ENSMUST00000146417.8	384198	Fam47e	mm10_genes_introns	chr5:92562628
chr17	86302909	86302909	1	*	69.36225685664654	chr17	86168941	86353554	184614	+	intron:612377	ENSMUST00000097275.8	18754	Prkce	mm10_genes_introns	chr17:86302909
chr5	114145938	114145938	1	*	-58.101979359767576	chr5	114145535	114146534	1000	+	promoter:36943	ENSMUST00000102582.7	100705	Acacb	mm10_genes_promoters	chr5:114145938
chrX	151803424	151803424	1	*	56.94961484003515	chrX	151802658	151803657	1000	+	promoter:137231	ENSMUST00000156616.8	59026	Huwe1	mm10_genes_promoters	chrX:151803424
chr2	20880051	20880051	1	*	65.31890302921845	chr2	20879961	20881851	1891	-	exon:88726	ENSMUST00000154230.8	71435	Arhgap21	mm10_genes_exons	chr2:20880051
chr1	167240042	167240042	1	*	-57.086276308418014	chr1	167237836	167241835	4000	-	1to5kb:7717	ENSMUST00000195443.5	80914	Uck2	mm10_genes_1to5kb	chr1:167240042
chr1	167240061	167240061	1	*	-57.086276308418014	chr1	167237836	167241835	4000	-	1to5kb:7717	ENSMUST00000195443.5	80914	Uck2	mm10_genes_1to5kb	chr1:167240061
chr1	167240074	167240074	1	*	-57.086276308418014	chr1	167237836	167241835	4000	-	1to5kb:7717	ENSMUST00000195443.5	80914	Uck2	mm10_genes_1to5kb	chr1:167240074
chr8	8644622	8644622	1	*	-56.09683286607671	chr8	8639490	8660483	20994	-	intron:332261	ENSMUST00000001319.14	13642	Efnb2	mm10_genes_introns	chr8:8644622
chr8	12432800	12432800	1	*	49.10631876559246	chr8	12431435	12436768	5334	+	exon:378464	ENSMUST00000186174.7	434280	Sox1ot	mm10_genes_exons	chr8:12432800
chr4	43632403	43632403	1	*	-60.57427889785855	chr4	43631935	43632851	917	+	exon:165392	ENSMUST00000030191.14	230103	Npr2	mm10_genes_exons	chr4:43632403
chr6	91517007	91517007	1	*	-67.30950409503994	chr6	91516889	91520888	4000	-	1to5kb:49336	ENSMUST00000032182.4	22591	Xpc	mm10_genes_1to5kb	chr6:91517007
chr19	47388097	47388097	1	*	-39.64198467194239	chr19	47373461	47397815	24355	-	intron:669251	ENSMUST00000081619.9	14218	Sh3pxd2a	mm10_genes_introns	chr19:47388097
chr4	43632391	43632391	1	*	-61.53740876673043	chr4	43631935	43632851	917	+	exon:165392	ENSMUST00000030191.14	230103	Npr2	mm10_genes_exons	chr4:43632391
chr2	174111000	174111000	1	*	-60.363590072751094	chr2	174110154	174111153	1000	+	promoter:13725	ENSMUST00000125502.2	228961	Npepl1	mm10_genes_promoters	chr2:174111000
chr4	133486338	133486338	1	*	72.93882335169943	chr4	133486084	133487938	1855	+	exon:178814	ENSMUST00000051676.6	100342	Tent5b	mm10_genes_exons	chr4:133486338
chr5	15691566	15691566	1	*	-50.870146694153206	chr5	15680839	15699173	18335	+	intron:176969	ENSMUST00000162113.1	75858	Speer4cos	mm10_genes_introns	chr5:15691566
chr4	140128290	140128290	1	*	73.56610809199135	chr4	140107377	140157460	50084	-	intron:171299	ENSMUST00000039331.8	230868	Igsf21	mm10_genes_introns	chr4:140128290
chr8	123185602	123185602	1	*	64.65200160038904	chr8	123185242	123186241	1000	+	promoter:66786	ENSMUST00000019422.5	13479	Dpep1	mm10_genes_promoters	chr8:123185602
chr7	73389565	73389565	1	*	-58.11674996080784	chr7	73386160	73390159	4000	+	1to5kb:54025	ENSMUST00000128471.1	244058	Rgma	mm10_genes_1to5kb	chr7:73389565
chr14	77904307	77904307	1	*	-71.53417711694723	chr14	77903407	77904406	1000	+	promoter:106994	ENSMUST00000169978.1	108670	Epsti1	mm10_genes_promoters	chr14:77904307
chr15	97720084	97720084	1	*	-58.117634704608804	chr15	97719686	97720119	434	-	intron:568010	ENSMUST00000023105.4	19011	Endou	mm10_genes_introns	chr15:97720084
chr5	73510332	73510332	1	*	-53.29281017849783	chr5	73509868	73510867	1000	+	promoter:35848	ENSMUST00000136268.2	100737	Dcun1d4	mm10_genes_promoters	chr5:73510332
chr5	130112444	130112444	1	*	57.66560400666094	chr5	130102536	130114467	11932	+	intron:194778	ENSMUST00000118993.7	22021	Tpst1	mm10_genes_introns	chr5:130112444
chr2	103420838	103420838	1	*	-59.49046647439121	chr2	103419062	103423061	4000	+	1to5kb:11498	ENSMUST00000028609.13	13711	Elf5	mm10_genes_1to5kb	chr2:103420838
chrX	153498304	153498304	1	*	-72.45180316652431	chrX	153498227	153498453	227	+	5UTR:92911	ENSMUST00000060714.9	54609	Ubqln2	mm10_genes_5UTRs	chrX:153498304
chr8	124673981	124673981	1	*	-56.4168448364178	chr8	124673657	124674220	564	-	exon:415600	ENSMUST00000126674.1	234875	Ttc13	mm10_genes_exons	chr8:124673981
chr5	43707157	43707157	1	*	-58.507161373679985	chr5	43706900	43709043	2144	+	intron:182734	ENSMUST00000048150.14	231214	Cc2d2a	mm10_genes_introns	chr5:43707157
chr18	60482165	60482165	1	*	58.593552300653926	chr18	60475586	60501392	25807	-	intron:644749	ENSMUST00000042710.7	106878	Smim3	mm10_genes_introns	chr18:60482165
chr16	34211269	34211269	1	*	-50.362044524638584	chr16	34205331	34212157	6827	-	intron:588693	ENSMUST00000076810.11	545156	Kalrn	mm10_genes_introns	chr16:34211269
chr14	121547089	121547089	1	*	46.33780174289068	chr14	121546657	121550193	3537	-	intron:543286	ENSMUST00000212376.2	105445	Dock9	mm10_genes_introns	chr14:121547089
chr19	22684962	22684962	1	*	70.7582024264867	chr19	22139302	22697421	558120	+	intron:652744	ENSMUST00000237357.1	226025	Trpm3	mm10_genes_introns	chr19:22684962
chr14	29715926	29715926	1	*	-52.655121401533236	chr14	29534598	29720871	186274	-	intron:532526	ENSMUST00000022567.8	12294	Cacna2d3	mm10_genes_introns	chr14:29715926
chr10	43054373	43054373	1	*	-50.79208414004543	chr10	43022919	43074592	51674	-	intron:407650	ENSMUST00000040275.8	109205	Sobp	mm10_genes_introns	chr10:43054373
chr12	4012348	4012348	1	*	49.675918072968514	chr12	4000957	4038703	37747	-	intron:483514	ENSMUST00000111178.1	668212	Efr3b	mm10_genes_introns	chr12:4012348
chr9	102528233	102528233	1	*	-63.61477074591464	chr9	102528018	102537600	9583	+	intron:359813	ENSMUST00000039390.5	16716	Ky	mm10_genes_introns	chr9:102528233
chr2	91931264	91931264	1	*	55.83811559103601	chr2	91931255	91931371	117	-	intron:89159	ENSMUST00000111309.7	17242	Mdk	mm10_genes_introns	chr2:91931264
chr9	96956328	96956328	1	*	58.129047528365696	chr9	96944705	96995574	50870	-	intron:380466	ENSMUST00000055433.4	211949	Spsb4	mm10_genes_introns	chr9:96956328
chr13	40287840	40287840	1	*	-43.48008854955137	chr13	40280914	40287971	7058	-	intron:506494	ENSMUST00000054635.7	218165	Ofcc1	mm10_genes_introns	chr13:40287840
chr7	19456057	19456057	1	*	58.15886861314571	chr7	19452735	19456734	4000	-	1to5kb:57949	ENSMUST00000207767.1	232944	Mark4	mm10_genes_1to5kb	chr7:19456057
chr12	85476310	85476310	1	*	59.28961950770339	chr12	85475817	85477273	1457	+	exon:573276	ENSMUST00000021674.6	14281	Fos	mm10_genes_exons	chr12:85476310
chr5	114597236	114597236	1	*	-38.95343001073447	chr5	114594468	114610826	16359	+	intron:190647	ENSMUST00000043650.7	433940	Fam222a	mm10_genes_introns	chr5:114597236
chr7	16224882	16224882	1	*	52.603720783446526	chr7	16223038	16227037	4000	-	1to5kb:57770	ENSMUST00000121123.7	71723	Dhx34	mm10_genes_1to5kb	chr7:16224882
chr16	24392422	24392422	1	*	-56.67837618880016	chr16	24388507	24392506	4000	+	1to5kb:116355	ENSMUST00000231352.1	210126	Lpp	mm10_genes_1to5kb	chr16:24392422
chr10	81364147	81364147	1	*	53.6535543655724	chr10	81363770	81366225	2456	+	exon:477883	ENSMUST00000044844.8	73822	Mfsd12	mm10_genes_exons	chr10:81364147
chr13	12478509	12478509	1	*	-73.71096406892283	chr13	12472632	12478574	5943	-	exon:605806	ENSMUST00000179308.2	171211	Edaradd	mm10_genes_exons	chr13:12478509
chr11	23258931	23258931	1	*	-74.74565460134284	chr11	23256718	23261834	5117	+	intron:421649	ENSMUST00000020538.12	103573	Xpo1	mm10_genes_introns	chr11:23258931
chr4	41661119	41661119	1	*	58.42350226606274	chr4	41658962	41661972	3011	-	intron:157461	ENSMUST00000102961.9	12804	Cntfr	mm10_genes_introns	chr4:41661119
chr5	65036538	65036538	1	*	-64.89891884920827	chr5	65034445	65038687	4243	+	intron:183911	ENSMUST00000031080.14	68303	Fam114a1	mm10_genes_introns	chr5:65036538
chr7	45689934	45689934	1	*	53.312234576321174	chr7	45686826	45691046	4221	+	intron:267830	ENSMUST00000182750.9	243967	Ntn5	mm10_genes_introns	chr7:45689934
chr1	74588855	74588855	1	*	52.790997489688785	chr1	74588029	74589028	1000	-	promoter:5690	ENSMUST00000113737.7	77264	Zfp142	mm10_genes_promoters	chr1:74588855
chr7	19137295	19137295	1	*	-50.81600202662222	chr7	19135378	19140172	4795	+	exon:313021	ENSMUST00000053109.4	243867	Fbxo46	mm10_genes_exons	chr7:19137295
chr18	15571572	15571572	1	*	69.45629160840062	chr18	15495328	15613681	118354	-	intron:641749	ENSMUST00000053017.12	71367	Chst9	mm10_genes_introns	chr18:15571572
chr19	53838893	53838893	1	*	-49.02643326948451	chr19	53838210	53842209	4000	+	1to5kb:132581	ENSMUST00000161856.1	73713	Rbm20	mm10_genes_1to5kb	chr19:53838893
chr18	73697121	73697121	1	*	50.91761111320069	chr18	73678040	73703429	25390	-	intron:646484	ENSMUST00000025393.13	17128	Smad4	mm10_genes_introns	chr18:73697121
chr4	129204844	129204844	1	*	70.87915015487225	chr4	129204538	129208537	4000	+	1to5kb:29017	ENSMUST00000146106.1	107271	Yars	mm10_genes_1to5kb	chr4:129204844
chr9	119631801	119631801	1	*	-57.851218895168174	chr9	119631579	119633740	2162	-	intron:386259	ENSMUST00000084787.5	20264	Scn10a	mm10_genes_introns	chr9:119631801
chr12	76268757	76268757	1	*	55.462454267614916	chr12	76255545	76270417	14873	+	intron:476095	ENSMUST00000021443.6	108156	Mthfd1	mm10_genes_introns	chr12:76268757
chrX	36796336	36796336	1	*	-57.843062220649045	chrX	36796279	36797278	1000	+	promoter:135435	ENSMUST00000156672.1	11740	Slc25a5	mm10_genes_promoters	chrX:36796336
chr10	81128520	81128520	1	*	71.69567429853474	chr10	81122613	81128606	5994	+	intron:397325	ENSMUST00000220329.1	26396	Map2k2	mm10_genes_introns	chr10:81128520
chr2	65979265	65979265	1	*	-55.53165505255811	chr2	65949130	66002302	53173	+	intron:53939	ENSMUST00000122912.7	77771	Csrnp3	mm10_genes_introns	chr2:65979265
chr7	25667757	25667757	1	*	-55.116258510754015	chr7	25667700	25668032	333	+	exon:314857	ENSMUST00000079634.7	27998	Exosc5	mm10_genes_exons	chr7:25667757
chr10	80788271	80788271	1	*	57.9093675207915	chr10	80788063	80789062	1000	+	promoter:80044	ENSMUST00000149394.1	208266	Dot1l	mm10_genes_promoters	chr10:80788271
chr4	127214512	127214512	1	*	-52.31297650433802	chr4	127214306	127214519	214	+	exon:176701	ENSMUST00000046659.13	242667	Dlgap3	mm10_genes_exons	chr4:127214512
chr7	96235666	96235666	1	*	48.705570861856934	chr7	96171494	96355355	183862	+	intron:273285	ENSMUST00000107162.7	23966	Tenm4	mm10_genes_introns	chr7:96235666
chr17	50047347	50047347	1	*	51.85413433331711	chr17	50047297	50047500	204	-	exon:751953	ENSMUST00000044503.13	76438	Rftn1	mm10_genes_exons	chr17:50047347
chr19	5071400	5071400	1	*	56.397155152899906	chr19	5071112	5071654	543	-	intron:660033	ENSMUST00000140389.7	381199	Tmem151a	mm10_genes_introns	chr19:5071400
chr10	19939470	19939470	1	*	-51.61017684746086	chr10	19935075	20000565	65491	+	intron:388434	ENSMUST00000095806.9	26408	Map3k5	mm10_genes_introns	chr10:19939470
chr10	19939480	19939480	1	*	-51.61017684746086	chr10	19935075	20000565	65491	+	intron:388434	ENSMUST00000095806.9	26408	Map3k5	mm10_genes_introns	chr10:19939480
chr11	113710569	113710569	1	*	-46.559158506405204	chr11	113710018	113711017	1000	-	promoter:92734	ENSMUST00000018871.7	52670	Cpsf4l	mm10_genes_promoters	chr11:113710569
chr10	81364116	81364116	1	*	62.53967796410931	chr10	81363770	81366225	2456	+	exon:477883	ENSMUST00000044844.8	73822	Mfsd12	mm10_genes_exons	chr10:81364116
chrX	135886142	135886142	1	*	-51.6441098307695	chrX	135885349	135886926	1578	+	exon:816733	ENSMUST00000207433.1	70237	Bhlhb9	mm10_genes_exons	chrX:135886142
chr12	76549566	76549566	1	*	-57.64422645655404	chr12	76548816	76552815	4000	-	1to5kb:97339	ENSMUST00000219353.1	100504549	AI463170	mm10_genes_1to5kb	chr12:76549566
chr1	131709721	131709721	1	*	-57.93474093750861	chr1	131705722	131711619	5898	+	intron:14086	ENSMUST00000064679.8	226421	Rab7b	mm10_genes_introns	chr1:131709721
chr7	125942783	125942783	1	*	61.46950637423676	chr7	125923535	125958434	34900	-	intron:307704	ENSMUST00000073935.6	269994	Gsg1l	mm10_genes_introns	chr7:125942783
chr4	117129853	117129853	1	*	53.19107002085326	chr4	117126619	117130618	4000	-	1to5kb:32282	ENSMUST00000183310.1	78611	Btbd19	mm10_genes_1to5kb	chr4:117129853
chr14	78678941	78678941	1	*	62.644404631528275	chr14	78653797	78724906	71110	-	intron:541650	ENSMUST00000226342.2	380921	Dgkh	mm10_genes_introns	chr14:78678941
chr4	119136404	119136404	1	*	-51.862157704263346	chr4	119136246	119137983	1738	+	exon:175128	ENSMUST00000030398.9	20525	Slc2a1	mm10_genes_exons	chr4:119136404
chr1	58030139	58030139	1	*	-48.55563323293878	chr1	58030059	58041435	11377	+	intron:5068	ENSMUST00000001027.6	11761	Aox1	mm10_genes_introns	chr1:58030139
chr5	25081819	25081819	1	*	-58.18237118130899	chr5	25028537	25100010	71474	-	intron:202038	ENSMUST00000030784.13	108099	Prkag2	mm10_genes_introns	chr5:25081819
chr8	84715978	84715978	1	*	60.39100782829265	chr8	84715069	84719068	4000	-	1to5kb:68779	ENSMUST00000132236.1	18032	Nfix	mm10_genes_1to5kb	chr8:84715978
chr10	127295921	127295921	1	*	52.25514092445893	chr10	127295723	127296288	566	+	exon:483457	ENSMUST00000026475.14	13198	Ddit3	mm10_genes_exons	chr10:127295921
chr13	42956834	42956834	1	*	-45.80404304788582	chr13	42956617	42958901	2285	+	exon:596039	ENSMUST00000132050.1	218194	Phactr1	mm10_genes_exons	chr13:42956834
chr19	10082361	10082361	1	*	71.23503931585664	chr19	10070625	10082564	11940	-	intron:662805	ENSMUST00000025567.8	56473	Fads2	mm10_genes_introns	chr19:10082361
chr5	113553096	113553096	1	*	-46.848552956901216	chr5	113551335	113558348	7014	+	intron:190097	ENSMUST00000094452.3	320916	Wscd2	mm10_genes_introns	chr5:113553096
chr12	69319439	69319439	1	*	-62.81478789371218	chr12	69316927	69320926	4000	-	1to5kb:97129	ENSMUST00000221193.1	66244	Nemf	mm10_genes_1to5kb	chr12:69319439
chr7	30574535	30574535	1	*	-52.46106837741657	chr7	30574175	30575174	1000	-	promoter:58739	ENSMUST00000128456.1	75410	Kmt2b	mm10_genes_promoters	chr7:30574535
chr12	21209397	21209397	1	*	-61.6169093687732	chr12	21206389	21212808	6420	+	intron:471397	ENSMUST00000064595.14	211914	Asap2	mm10_genes_introns	chr12:21209397
chr5	119839580	119839580	1	*	67.85054326127718	chr5	119838791	119840766	1976	+	intron:192083	ENSMUST00000202723.3	21388	Tbx5	mm10_genes_introns	chr5:119839580
chr2	121306557	121306557	1	*	54.56197656320969	chr2	121299269	121307372	8104	+	exon:73734	ENSMUST00000094639.9	17754	Map1a	mm10_genes_exons	chr2:121306557
chr6	113171853	113171853	1	*	-49.843605891119566	chr6	113168090	113171958	3869	-	exon:300606	ENSMUST00000162280.1	269788	Lhfpl4	mm10_genes_exons	chr6:113171853
chr14	21684584	21684584	1	*	-57.9415953591082	chr14	21677161	21686614	9454	-	intron:530987	ENSMUST00000073870.6	435391	Dupd1	mm10_genes_introns	chr14:21684584
chr11	49793377	49793377	1	*	59.00772263143714	chr11	49793178	49794177	1000	+	promoter:85491	ENSMUST00000130129.1	14584	Gfpt2	mm10_genes_promoters	chr11:49793377
chr15	100716659	100716659	1	*	-53.947254918078734	chr15	100716515	100720014	3500	-	intron:569984	ENSMUST00000159715.7	207839	Galnt6	mm10_genes_introns	chr15:100716659
chr5	123018846	123018846	1	*	54.03636829902938	chr5	123015567	123029074	13508	+	intron:193208	ENSMUST00000051016.4	109305	Orai1	mm10_genes_introns	chr5:123018846
chr7	133738318	133738318	1	*	53.078922404172104	chr7	133737435	133742428	4994	-	intron:310182	ENSMUST00000033290.11	101437	Dhx32	mm10_genes_introns	chr7:133738318
chr11	113975442	113975442	1	*	-52.89975412885393	chr11	113943279	114065802	122524	-	intron:465563	ENSMUST00000041627.13	237979	Sdk2	mm10_genes_introns	chr11:113975442
chr1	189755260	189755260	1	*	-57.25569032693806	chr1	189728665	189786635	57971	+	intron:21481	ENSMUST00000097442.8	19250	Ptpn14	mm10_genes_introns	chr1:189755260
chr18	37092024	37092024	1	*	-56.9377524200488	chr18	37090013	37092571	2559	+	exon:762266	ENSMUST00000007584.3	353236	Pcdhac1	mm10_genes_exons	chr18:37092024
chr7	107209324	107209324	1	*	-57.2624051131841	chr7	107208445	107209444	1000	+	promoter:55261	ENSMUST00000098135.1	76572	Rbmxl2	mm10_genes_promoters	chr7:107209324
chr12	111378963	111378963	1	*	52.09821997138972	chr12	111378719	111382718	4000	-	1to5kb:98266	ENSMUST00000041965.4	217866	Cdc42bpb	mm10_genes_1to5kb	chr12:111378963
chr4	138827291	138827291	1	*	66.81752300962702	chr4	138826857	138830856	4000	+	1to5kb:29550	ENSMUST00000077582.13	18780	Pla2g2a	mm10_genes_1to5kb	chr4:138827291
chr15	81777274	81777274	1	*	52.80602850164815	chr15	81773667	81777666	4000	+	1to5kb:111821	ENSMUST00000230590.1	20286	Zc3h7b	mm10_genes_1to5kb	chr15:81777274
chr6	137483912	137483912	1	*	54.25608321319268	chr6	137483723	137490216	6494	-	intron:256579	ENSMUST00000058210.12	13860	Eps8	mm10_genes_introns	chr6:137483912
chr3	88482672	88482672	1	*	62.297066412801485	chr3	88480147	88483413	3267	-	exon:150147	ENSMUST00000147537.5	16905	Lmna	mm10_genes_exons	chr3:88482672
chr16	34967476	34967476	1	*	-43.10885070985681	chr16	34963847	34971241	7395	+	intron:578302	ENSMUST00000023538.8	107589	Mylk	mm10_genes_introns	chr16:34967476
chr8	125859355	125859355	1	*	-46.00287898411995	chr8	125855362	125860953	5592	-	intron:345788	ENSMUST00000047239.12	270109	Pcnx2	mm10_genes_introns	chr8:125859355
chr1	91839743	91839743	1	*	-58.80722530636795	chr1	91802150	91847388	45239	+	intron:11343	ENSMUST00000007949.3	13345	Twist2	mm10_genes_introns	chr1:91839743
chr12	72303967	72303967	1	*	-58.91910011947985	chr12	72303657	72304418	762	-	exon:585292	ENSMUST00000078505.13	104001	Rtn1	mm10_genes_exons	chr12:72303967
chr1	131088546	131088546	1	*	48.78162656618248	chr1	131058763	131097288	38526	-	intron:34511	ENSMUST00000016672.10	17164	Mapkapk2	mm10_genes_introns	chr1:131088546
chr16	28647952	28647952	1	*	54.914783903730246	chr16	28398389	28752833	354445	-	intron:587678	ENSMUST00000232352.1	14167	Fgf12	mm10_genes_introns	chr16:28647952
chr7	44744500	44744500	1	*	51.76815140519601	chr7	44744231	44745230	1000	-	promoter:59395	ENSMUST00000149011.8	243963	Zfp473	mm10_genes_promoters	chr7:44744500
chr7	141465315	141465315	1	*	-47.918340619223684	chr7	141464674	141465673	1000	+	promoter:56732	ENSMUST00000116247.2	213573	Cracr2b	mm10_genes_promoters	chr7:141465315
chrX	73483699	73483699	1	*	51.69105584417822	chrX	73483602	73483762	161	+	5UTR:91897	ENSMUST00000033741.14	12111	Bgn	mm10_genes_5UTRs	chrX:73483699
chr3	86092634	86092634	1	*	71.74489954892977	chr3	86085358	86093689	8332	+	intron:109009	ENSMUST00000238443.1	27059	Sh3d19	mm10_genes_introns	chr3:86092634
chr10	77608032	77608032	1	*	55.42798138340199	chr10	77606342	77609811	3470	+	intron:395473	ENSMUST00000020501.14	20610	Sumo3	mm10_genes_introns	chr10:77608032
chr19	23788934	23788934	1	*	-63.419528274428686	chr19	23759092	23892734	133643	+	intron:653185	ENSMUST00000025830.8	319924	Apba1	mm10_genes_introns	chr19:23788934
chr11	74414410	74414410	1	*	-45.141293636479595	chr11	74414391	74414520	130	-	exon:546780	ENSMUST00000102521.8	380711	Rap1gap2	mm10_genes_exons	chr11:74414410
chr5	66575301	66575301	1	*	52.41349156643027	chr5	66543618	66618567	74950	-	intron:206341	ENSMUST00000162366.7	11787	Apbb2	mm10_genes_introns	chr5:66575301
chr5	135909940	135909940	1	*	64.2852069490798	chr5	135908409	135911651	3243	-	exon:261586	ENSMUST00000055808.5	22628	Ywhag	mm10_genes_exons	chr5:135909940
chr11	76120517	76120517	1	*	57.46192661988516	chr11	76117806	76121517	3712	-	intron:456216	ENSMUST00000056601.10	68299	Vps53	mm10_genes_introns	chr11:76120517
chrX	102251689	102251689	1	*	-60.36547009785052	chrX	102250947	102251946	1000	-	promoter:139081	ENSMUST00000134887.7	12705	Cited1	mm10_genes_promoters	chrX:102251689
chr18	69462524	69462524	1	*	48.390737936804015	chr18	69461924	69465350	3427	+	intron:638134	ENSMUST00000203002.3	21413	Tcf4	mm10_genes_introns	chr18:69462524
chr6	30372789	30372789	1	*	-60.849031304700716	chr6	30372738	30372950	213	-	exon:290828	ENSMUST00000080812.13	232679	Zc3hc1	mm10_genes_exons	chr6:30372789
chrX	151520671	151520671	1	*	47.79641727384	chrX	151519672	151520671	1000	+	promoter:137208	ENSMUST00000112666.7	320595	Phf8	mm10_genes_promoters	chrX:151520671
chr11	58457774	58457774	1	*	-47.52893488593505	chr11	58453924	58457923	4000	-	1to5kb:90119	ENSMUST00000064614.3	403200	Lypd9	mm10_genes_1to5kb	chr11:58457774
chrX	137038369	137038369	1	*	-44.77459266918284	chrX	137038301	137039300	1000	-	promoter:139536	ENSMUST00000113069.8	67062	Slc25a53	mm10_genes_promoters	chrX:137038369
chr8	110743804	110743804	1	*	-64.4108747108251	chr8	110743699	110747698	4000	-	1to5kb:69485	ENSMUST00000154803.1	76527	Il34	mm10_genes_1to5kb	chr8:110743804
chr15	92138261	92138261	1	*	-51.735018271153066	chr15	92051324	92216315	164992	+	intron:553488	ENSMUST00000141187.7	12805	Cntn1	mm10_genes_introns	chr15:92138261
chr18	32023295	32023295	1	*	-44.65227750536649	chr18	32021576	32036872	15297	-	intron:642397	ENSMUST00000134663.1	17922	Myo7b	mm10_genes_introns	chr18:32023295
chr5	143254423	143254423	1	*	69.0823532036005	chr5	143249697	143255565	5869	-	exon:264422	ENSMUST00000161448.7	54201	Zfp316	mm10_genes_exons	chr5:143254423
chr7	19267364	19267364	1	*	-69.1536360635151	chr7	19266547	19267546	1000	-	promoter:57922	ENSMUST00000206229.1	22323	Vasp	mm10_genes_promoters	chr7:19267364
chr11	89003226	89003226	1	*	-55.29898776219719	chr11	89000083	89004728	4646	+	intron:435926	ENSMUST00000100627.8	217069	Trim25	mm10_genes_introns	chr11:89003226
chr2	167622098	167622098	1	*	45.173578675451786	chr2	167617978	167631939	13962	-	intron:101224	ENSMUST00000109207.9	66589	Ube2v1	mm10_genes_introns	chr2:167622098
chr8	84583530	84583530	1	*	56.10479496535877	chr8	84581352	84583558	2207	+	intron:323280	ENSMUST00000238701.1	12286	Cacna1a	mm10_genes_introns	chr8:84583530
chr9	21121660	21121660	1	*	-41.46791358408636	chr9	21121392	21121758	367	-	exon:443502	ENSMUST00000213717.1	54721	Tyk2	mm10_genes_exons	chr9:21121660
chr3	95683803	95683803	1	*	-62.62909035552351	chr3	95681097	95685096	4000	-	1to5kb:24894	ENSMUST00000124410.1	229595	Adamtsl4	mm10_genes_1to5kb	chr3:95683803
chr19	28605366	28605366	1	*	-60.92663224889356	chr19	28540409	28665752	125344	-	intron:665028	ENSMUST00000162022.7	226075	Glis3	mm10_genes_introns	chr19:28605366
chr2	128881326	128881326	1	*	-58.726657724604856	chr2	128880427	128889700	9274	+	intron:63102	ENSMUST00000110324.7	70370	Fbln7	mm10_genes_introns	chr2:128881326
chr15	89556736	89556736	1	*	-55.047727856580494	chr15	89556721	89556748	28	+	exon:665311	ENSMUST00000039074.13	58234	Shank3	mm10_genes_exons	chr15:89556736
chr5	113844686	113844686	1	*	-59.47790212126402	chr5	113844469	113845160	692	-	intron:213123	ENSMUST00000164980.7	23790	Coro1c	mm10_genes_introns	chr5:113844686
chr8	83711623	83711623	1	*	-51.02945598202309	chr8	83710177	83714176	4000	+	1to5kb:65478	ENSMUST00000019576.14	68278	Ddx39	mm10_genes_1to5kb	chr8:83711623
chr14	55826778	55826778	1	*	46.225706294397185	chr14	55826038	55827037	1000	+	promoter:106441	ENSMUST00000227746.1	73181	Nfatc4	mm10_genes_promoters	chr14:55826778
chr8	47415136	47415136	1	*	-66.05737762836492	chr8	47414838	47418837	4000	-	1to5kb:67937	ENSMUST00000211882.1	71069	Stox2	mm10_genes_1to5kb	chr8:47415136
chr8	11006331	11006331	1	*	53.741329556983295	chr8	11002850	11006849	4000	+	1to5kb:63760	ENSMUST00000180750.7	619321	9530052E02Rik	mm10_genes_1to5kb	chr8:11006331
chr2	7311417	7311417	1	*	-46.20950049730882	chr2	7185511	7395857	210347	-	intron:72894	ENSMUST00000002176.12	14007	Celf2	mm10_genes_introns	chr2:7311417
chr3	89866135	89866135	1	*	57.337184184989745	chr3	89864059	89871386	7328	-	exon:151027	ENSMUST00000197679.4	16194	Il6ra	mm10_genes_exons	chr3:89866135
chr6	97568608	97568608	1	*	64.43492318246564	chr6	97528852	97617189	88338	-	intron:250211	ENSMUST00000113355.8	232288	Frmd4b	mm10_genes_introns	chr6:97568608
chr6	97568616	97568616	1	*	64.43492318246564	chr6	97528852	97617189	88338	-	intron:250211	ENSMUST00000113355.8	232288	Frmd4b	mm10_genes_introns	chr6:97568616
chr2	69162707	69162707	1	*	-47.9601753971169	chr2	69161169	69165881	4713	+	intron:54214	ENSMUST00000041865.7	329416	Nostrin	mm10_genes_introns	chr2:69162707
chr11	36081264	36081264	1	*	-42.274930474685966	chr11	36078571	36106718	28148	-	intron:448567	ENSMUST00000102801.7	23964	Tenm2	mm10_genes_introns	chr11:36081264
chr1	74588879	74588879	1	*	-56.905415387942085	chr1	74588029	74589028	1000	-	promoter:5690	ENSMUST00000113737.7	77264	Zfp142	mm10_genes_promoters	chr1:74588879
chr19	25232307	25232307	1	*	-65.77652873565395	chr19	25231975	25235974	4000	+	1to5kb:131830	ENSMUST00000049400.14	107351	Kank1	mm10_genes_1to5kb	chr19:25232307
chr14	55492984	55492984	1	*	-53.6627789773913	chr14	55492427	55493426	1000	+	promoter:106340	ENSMUST00000227070.1	268747	Carmil3	mm10_genes_promoters	chr14:55492984
chr2	163550216	163550216	1	*	63.35650529988548	chr2	163550083	163550242	160	+	exon:82410	ENSMUST00000137449.1	15378	Hnf4a	mm10_genes_exons	chr2:163550216
chr19	25232259	25232259	1	*	-65.80380021706885	chr19	25231975	25235974	4000	+	1to5kb:131830	ENSMUST00000049400.14	107351	Kank1	mm10_genes_1to5kb	chr19:25232259
chr19	25232261	25232261	1	*	-65.80380021706885	chr19	25231975	25235974	4000	+	1to5kb:131830	ENSMUST00000049400.14	107351	Kank1	mm10_genes_1to5kb	chr19:25232261
chr10	82884962	82884962	1	*	-45.13993320285565	chr10	82881846	82885845	4000	+	1to5kb:80293	ENSMUST00000218724.1	50493	Txnrd1	mm10_genes_1to5kb	chr10:82884962
chr19	45039991	45039991	1	*	41.72457931262903	chr19	45039750	45040160	411	-	intron:668351	ENSMUST00000169459.3	100503041	Pdzd7	mm10_genes_introns	chr19:45039991
chr6	53925364	53925364	1	*	-64.75732918025281	chr6	53925307	53926809	1503	-	intron:245746	ENSMUST00000203101.2	71287	Cpvl	mm10_genes_introns	chr6:53925364
chr18	52825534	52825534	1	*	46.290821553100535	chr18	52825310	52826283	974	+	exon:764019	ENSMUST00000238707.1	113939900	Ancv1r	mm10_genes_exons	chr18:52825534
chr9	52149548	52149548	1	*	52.4541319309006	chr9	52144427	52168501	24075	-	intron:374189	ENSMUST00000213645.1	244871	Zc3h12c	mm10_genes_introns	chr9:52149548
chr10	95533647	95533647	1	*	-61.558701599828765	chr10	95515238	95541204	25967	+	intron:399687	ENSMUST00000099329.4	93765	Ube2n	mm10_genes_introns	chr10:95533647
chr4	131820820	131820820	1	*	-43.39065463527626	chr4	131820708	131820979	272	-	exon:201944	ENSMUST00000105987.8	19273	Ptpru	mm10_genes_exons	chr4:131820820
chr12	33170543	33170543	1	*	56.906095766544105	chr12	33147916	33217711	69796	+	intron:472478	ENSMUST00000077456.12	380753	Atxn7l1	mm10_genes_introns	chr12:33170543
chr9	107479717	107479717	1	*	-43.41437698111895	chr9	107465670	107497459	31790	+	intron:360917	ENSMUST00000010210.12	56808	Cacna2d2	mm10_genes_introns	chr9:107479717
chr7	80587533	80587533	1	*	-49.7530657901125	chr7	80586627	80589951	3325	-	exon:361253	ENSMUST00000122255.7	70461	Crtc3	mm10_genes_exons	chr7:80587533
chr9	119136331	119136331	1	*	35.30351402253567	chr9	119135295	119136640	1346	+	intron:365323	ENSMUST00000165231.7	320256	Dlec1	mm10_genes_introns	chr9:119136331
chr15	79126549	79126549	1	*	56.069750971768975	chr15	79125675	79126926	1252	+	intron:550528	ENSMUST00000040320.9	27008	Micall1	mm10_genes_introns	chr15:79126549
chr8	70883998	70883998	1	*	-60.134233366344915	chr8	70883969	70884920	952	-	intron:338213	ENSMUST00000000809.2	114479	Slc5a5	mm10_genes_introns	chr8:70883998
chr2	31315244	31315244	1	*	-50.93698621312935	chr2	31314677	31333854	19178	+	intron:50228	ENSMUST00000113532.8	665700	Hmcn2	mm10_genes_introns	chr2:31315244
chr15	12382811	12382811	1	*	-60.562338084857224	chr15	12382744	12385160	2417	-	intron:557177	ENSMUST00000075317.11	68070	Pdzd2	mm10_genes_introns	chr15:12382811
chr9	70211806	70211806	1	*	-62.981960442301485	chr9	70207704	70286911	79208	+	intron:355946	ENSMUST00000213863.1	71602	Myo1e	mm10_genes_introns	chr9:70211806
chr8	119492240	119492240	1	*	50.05482360119235	chr8	119487421	119492244	4824	-	intron:344216	ENSMUST00000036748.14	234788	Slc38a8	mm10_genes_introns	chr8:119492240
chr10	60088871	60088871	1	*	-56.763874653314105	chr10	60064409	60098092	33684	+	intron:391860	ENSMUST00000050516.13	69090	Ascc1	mm10_genes_introns	chr10:60088871
chr6	29268936	29268936	1	*	48.59532710431618	chr6	29267488	29271487	4000	+	1to5kb:43505	ENSMUST00000115289.1	69573	Hilpda	mm10_genes_1to5kb	chr6:29268936
chr9	111453560	111453560	1	*	-52.74796099702319	chr9	111439353	111467477	28125	+	intron:364459	ENSMUST00000111879.4	245038	Dclk3	mm10_genes_introns	chr9:111453560
chr13	45921053	45921053	1	*	-53.661297058535816	chr13	45852457	45956454	103998	-	intron:506963	ENSMUST00000091628.10	20238	Atxn1	mm10_genes_introns	chr13:45921053
chr8	118379336	118379336	1	*	56.744088161924154	chr8	118283899	118505603	221705	+	intron:329412	ENSMUST00000117160.1	12554	Cdh13	mm10_genes_introns	chr8:118379336
chr15	80630274	80630274	1	*	46.51344426940203	chr15	80623815	80634335	10521	+	intron:550977	ENSMUST00000229980.1	17444	Grap2	mm10_genes_introns	chr15:80630274
chr8	70331285	70331285	1	*	-47.22047188161259	chr8	70330699	70331592	894	+	exon:385634	ENSMUST00000165819.8	14559	Gdf1	mm10_genes_exons	chr8:70331285
chr12	3366757	3366757	1	*	-54.57188932387953	chr12	3365772	3367531	1760	+	exon:562538	ENSMUST00000220210.1	16570	Kif3c	mm10_genes_exons	chr12:3366757
chr5	92257605	92257605	1	*	-43.94479393024046	chr5	92257279	92261278	4000	-	1to5kb:40649	ENSMUST00000201130.3	19023	Ppef2	mm10_genes_1to5kb	chr5:92257605
chr10	121059410	121059410	1	*	-56.63593876218184	chr10	121035106	121075245	40140	+	intron:401761	ENSMUST00000020439.10	24117	Wif1	mm10_genes_introns	chr10:121059410
chr10	22643916	22643916	1	*	50.83715098408532	chr10	22640011	22644010	4000	+	1to5kb:78487	ENSMUST00000042261.4	353169	Slc2a12	mm10_genes_1to5kb	chr10:22643916
chr12	66899551	66899551	1	*	-36.989221222034196	chr12	66868807	67220969	352163	-	intron:486980	ENSMUST00000037181.15	320772	Mdga2	mm10_genes_introns	chr12:66899551
chr2	25195801	25195801	1	*	56.260390952014305	chr2	25192966	25195925	2960	-	exon:89828	ENSMUST00000081869.6	227612	Tor4a	mm10_genes_exons	chr2:25195801
chr12	3366724	3366724	1	*	-54.5382342934257	chr12	3365772	3367531	1760	+	exon:562538	ENSMUST00000220210.1	16570	Kif3c	mm10_genes_exons	chr12:3366724
chr6	113458145	113458145	1	*	-47.501917749743775	chr6	113457484	113458483	1000	+	promoter:45989	ENSMUST00000058548.13	57890	Il17re	mm10_genes_promoters	chr6:113458145
chr4	154891105	154891105	1	*	56.78573443972432	chr4	154887825	154891824	4000	+	1to5kb:30105	ENSMUST00000129623.1	27390	Mmel1	mm10_genes_1to5kb	chr4:154891105
chr5	127708588	127708588	1	*	-60.467461957398115	chr5	127706863	127709374	2512	+	exon:232036	ENSMUST00000118139.2	319804	Glt1d1	mm10_genes_exons	chr5:127708588
chr11	78009647	78009647	1	*	-54.33236170263921	chr11	78009401	78009794	394	+	exon:519682	ENSMUST00000108360.7	268448	Phf12	mm10_genes_exons	chr11:78009647
chr19	4890587	4890587	1	*	52.67477262802949	chr19	4886878	4890758	3881	-	exon:792864	ENSMUST00000053506.7	52028	Bbs1	mm10_genes_exons	chr19:4890587
chr2	5609965	5609965	1	*	62.61223323784001	chr2	5565781	5714145	148365	-	intron:72720	ENSMUST00000044009.13	227541	Camk1d	mm10_genes_introns	chr2:5609965
chr4	137484176	137484176	1	*	-51.33448692754718	chr4	137468925	137501058	32134	+	intron:150313	ENSMUST00000030547.14	15530	Hspg2	mm10_genes_introns	chr4:137484176
chr15	78803311	78803311	1	*	-64.4458051064235	chr15	78803043	78804042	1000	-	promoter:114140	ENSMUST00000164826.7	105844	Card10	mm10_genes_promoters	chr15:78803311
chrX	151803486	151803486	1	*	41.14107635530086	chrX	151802658	151803657	1000	+	promoter:137231	ENSMUST00000156616.8	59026	Huwe1	mm10_genes_promoters	chrX:151803486
chr5	24367261	24367261	1	*	51.546044865594844	chr5	24367198	24367346	149	+	exon:212560	ENSMUST00000115090.5	18127	Nos3	mm10_genes_exons	chr5:24367261
chr4	133391987	133391987	1	*	-54.86070839149687	chr4	133370908	133411836	40929	+	intron:149531	ENSMUST00000030669.7	20544	Slc9a1	mm10_genes_introns	chr4:133391987
chr3	108206893	108206893	1	*	45.26573839037152	chr3	108206823	108207013	191	-	exon:155852	ENSMUST00000117409.7	72522	Atxn7l2	mm10_genes_exons	chr3:108206893
chr3	108544548	108544548	1	*	55.977095968434675	chr3	108544161	108544576	416	+	intron:115587	ENSMUST00000029485.5	75504	1700013F07Rik	mm10_genes_introns	chr3:108544548
chr16	72833738	72833738	1	*	-46.920308473799984	chr16	72742453	72904629	162177	+	intron:580962	ENSMUST00000232205.1	19876	Robo1	mm10_genes_introns	chr16:72833738
chr17	57279938	57279938	1	*	-49.107449125189156	chr17	57279402	57295981	16580	+	intron:609109	ENSMUST00000169220.8	22324	Vav1	mm10_genes_introns	chr17:57279938
chr14	79033961	79033961	1	*	-62.56577969267633	chr14	79026078	79038124	12047	+	intron:527946	ENSMUST00000040990.6	219189	Vwa8	mm10_genes_introns	chr14:79033961
chr13	59821761	59821761	1	*	68.23577033257439	chr13	59821560	59822110	551	-	exon:612464	ENSMUST00000071703.5	214290	Tut7	mm10_genes_exons	chr13:59821761
chr2	115346957	115346957	1	*	44.852114339471626	chr2	115345281	115349280	4000	-	1to5kb:17451	ENSMUST00000152815.1	78193	4930528P14Rik	mm10_genes_1to5kb	chr2:115346957
chr19	46766676	46766676	1	*	51.36892309895198	chr19	46763394	46853900	90507	+	intron:656871	ENSMUST00000099373.11	94219	Cnnm2	mm10_genes_introns	chr19:46766676
chr7	81872877	81872877	1	*	42.006363344137426	chr7	81872493	81873492	1000	+	promoter:54265	ENSMUST00000130006.1	107769	Tm6sf1	mm10_genes_promoters	chr7:81872877
chr19	37549947	37549947	1	*	-44.423461874228295	chr19	37549418	37550417	1000	+	promoter:132109	ENSMUST00000066439.7	107371	Exoc6	mm10_genes_promoters	chr19:37549947
chr19	47821634	47821634	1	*	-49.79869124919756	chr19	47815973	47823028	7056	-	intron:669463	ENSMUST00000160247.2	100048534	Cfap43	mm10_genes_introns	chr19:47821634
chr2	59044067	59044067	1	*	50.39750054056857	chr2	59018606	59160346	141741	-	intron:82170	ENSMUST00000226455.1	227933	Ccdc148	mm10_genes_introns	chr2:59044067
chr4	6192154	6192154	1	*	-58.66971699250776	chr4	6191214	6196410	5197	+	intron:135412	ENSMUST00000029907.5	68053	Ubxn2b	mm10_genes_introns	chr4:6192154
chr19	57324049	57324049	1	*	-63.701595952384416	chr19	57323193	57324062	870	-	exon:805732	ENSMUST00000235159.1	320879	B230217O12Rik	mm10_genes_exons	chr19:57324049
chr6	128038027	128038027	1	*	-52.94916502547324	chr6	128035593	128039592	4000	-	1to5kb:50306	ENSMUST00000123786.8	109246	Tspan9	mm10_genes_1to5kb	chr6:128038027
chr7	24994669	24994669	1	*	54.411884672800035	chr7	24994536	24994734	199	-	exon:347770	ENSMUST00000102858.9	232975	Atp1a3	mm10_genes_exons	chr7:24994669
chr2	31887544	31887544	1	*	60.3155563589751	chr2	31887291	31887743	453	+	exon:60441	ENSMUST00000138325.7	23928	Lamc3	mm10_genes_exons	chr2:31887544
chr17	43413466	43413466	1	*	-56.95766134900282	chr17	43410557	43422497	11941	+	intron:606950	ENSMUST00000226087.1	224792	Adgrf5	mm10_genes_introns	chr17:43413466
chr19	7110116	7110116	1	*	54.49235632984919	chr19	7106730	7110729	4000	-	1to5kb:133419	ENSMUST00000113383.3	396184	Flrt1	mm10_genes_1to5kb	chr19:7110116
chr15	79800870	79800870	1	*	49.56083111569451	chr15	79794476	79803974	9499	-	intron:564636	ENSMUST00000023057.9	73340	Nptxr	mm10_genes_introns	chr15:79800870
chr4	151306667	151306667	1	*	-50.94399351255971	chr4	151290104	151453283	163180	-	intron:174052	ENSMUST00000169423.8	100072	Camta1	mm10_genes_introns	chr4:151306667
chr7	119516332	119516332	1	*	45.49039359691375	chr7	119514463	119518462	4000	+	1to5kb:55577	ENSMUST00000207796.1	272428	Acsm5	mm10_genes_1to5kb	chr7:119516332
chr12	4012313	4012313	1	*	42.15564247219211	chr12	4000957	4038703	37747	-	intron:483514	ENSMUST00000111178.1	668212	Efr3b	mm10_genes_introns	chr12:4012313
chr3	159891600	159891600	1	*	39.599873583336084	chr3	159873182	159897330	24149	+	intron:120218	ENSMUST00000068952.9	68151	Wls	mm10_genes_introns	chr3:159891600
chr13	103226356	103226356	1	*	70.15825971451268	chr13	103171557	103333835	162279	-	intron:514742	ENSMUST00000166726.7	328329	Mast4	mm10_genes_introns	chr13:103226356
chr19	58816794	58816794	1	*	-42.5420711582028	chr19	58809622	58820999	11378	-	intron:670963	ENSMUST00000066285.5	73442	Hspa12a	mm10_genes_introns	chr19:58816794
chr17	34612333	34612333	1	*	-55.853404969095436	chr17	34612253	34612443	191	+	exon:726904	ENSMUST00000173973.7	55979	Agpat1	mm10_genes_exons	chr17:34612333
chr15	78240404	78240404	1	*	-64.34382550853094	chr15	78239801	78243800	4000	+	1to5kb:111522	ENSMUST00000096357.11	17972	Ncf4	mm10_genes_1to5kb	chr15:78240404
chr5	128782023	128782023	1	*	-62.27290927939466	chr5	128781841	128782551	711	-	exon:259308	ENSMUST00000238334.1	231760	Rimbp2	mm10_genes_exons	chr5:128782023
chr6	91706239	91706239	1	*	48.59061402955058	chr6	91699033	91723281	24249	+	intron:233918	ENSMUST00000032185.8	21366	Slc6a6	mm10_genes_introns	chr6:91706239
chr3	95173183	95173183	1	*	73.46819944727731	chr3	95172255	95173653	1399	+	exon:134150	ENSMUST00000204709.2	20360	Sema6c	mm10_genes_exons	chr3:95173183
chr3	14871588	14871588	1	*	-65.72372784269523	chr3	14871542	14872523	982	+	exon:123145	ENSMUST00000029076.5	12350	Car3	mm10_genes_exons	chr3:14871588
chr12	70267557	70267557	1	*	-40.85842081003794	chr12	70267267	70268061	795	-	intron:487873	ENSMUST00000110522.9	94090	Trim9	mm10_genes_introns	chr12:70267557
chr10	120797586	120797586	1	*	52.159142680573645	chr10	120791500	120825107	33608	-	intron:417827	ENSMUST00000092143.11	320183	Msrb3	mm10_genes_introns	chr10:120797586
chr1	73717675	73717675	1	*	-57.55978954446523	chr1	73673067	73743599	70533	-	intron:28906	ENSMUST00000191114.6	109198	6030407O03Rik	mm10_genes_introns	chr1:73717675
chr9	22055715	22055715	1	*	68.36104949546878	chr9	22053011	22057010	4000	-	1to5kb:74637	ENSMUST00000003501.8	15571	Elavl3	mm10_genes_1to5kb	chr9:22055715
chr1	86581605	86581605	1	*	72.94154453346266	chr1	86577904	86581903	4000	+	1to5kb:1792	ENSMUST00000121534.7	26895	Cops7b	mm10_genes_1to5kb	chr1:86581605
chr9	95035009	95035009	1	*	52.15165490678733	chr9	95020713	95055411	34699	+	intron:358831	ENSMUST00000033463.9	331004	Slc9a9	mm10_genes_introns	chr9:95035009
chr11	67113301	67113301	1	*	-45.52479629511519	chr11	67112461	67114117	1657	-	exon:543543	ENSMUST00000125538.7	74184	2310065F04Rik	mm10_genes_exons	chr11:67113301
chr11	116695078	116695078	1	*	50.97610503021068	chr11	116694869	116695868	1000	-	promoter:92995	ENSMUST00000079545.5	20446	St6galnac2	mm10_genes_promoters	chr11:116695078
chr6	89357039	89357039	1	*	-58.78766179493389	chr6	89356458	89357718	1261	-	exon:298396	ENSMUST00000163139.7	18844	Plxna1	mm10_genes_exons	chr6:89357039
chr13	38153743	38153743	1	*	45.27920566932268	chr13	38151795	38164763	12969	+	intron:496034	ENSMUST00000124830.2	109620	Dsp	mm10_genes_introns	chr13:38153743
chr3	96824800	96824800	1	*	47.490856170956015	chr3	96824284	96828283	4000	+	1to5kb:21624	ENSMUST00000135031.7	59020	Pdzk1	mm10_genes_1to5kb	chr3:96824800
chr8	70431257	70431257	1	*	-59.103515594816244	chr8	70431160	70431285	126	-	exon:406085	ENSMUST00000153632.1	382056	Crtc1	mm10_genes_exons	chr8:70431257
chr7	144678548	144678548	1	*	51.98459426211197	chr7	144669676	144678633	8958	-	intron:312862	ENSMUST00000121758.7	101772	Ano1	mm10_genes_introns	chr7:144678548
chr1	75359911	75359911	1	*	58.40037168315646	chr1	75359329	75360328	1000	+	promoter:1494	ENSMUST00000027409.9	13346	Des	mm10_genes_promoters	chr1:75359911
chr16	44531434	44531434	1	*	-38.81903407126931	chr16	44521336	44558437	37102	-	intron:589941	ENSMUST00000114634.2	117606	Boc	mm10_genes_introns	chr16:44531434
chr5	135249591	135249591	1	*	54.105565402891756	chr5	135248938	135251230	2293	-	exon:261297	ENSMUST00000062572.2	14371	Fzd9	mm10_genes_exons	chr5:135249591
chr2	59287767	59287767	1	*	52.07263876094763	chr2	59266501	59289217	22717	+	intron:53282	ENSMUST00000168631.7	227937	Pkp4	mm10_genes_introns	chr2:59287767
chr11	73039706	73039706	1	*	52.46528319517887	chr11	73038516	73040220	1705	+	intron:430777	ENSMUST00000155720.1	55984	Camkk1	mm10_genes_introns	chr11:73039706
chr12	54035245	54035245	1	*	58.39475936209644	chr12	54003572	54044531	40960	+	intron:473699	ENSMUST00000223358.1	27386	Npas3	mm10_genes_introns	chr12:54035245
chr5	137731904	137731904	1	*	-56.15684688680521	chr5	137729899	137731933	2035	-	exon:262864	ENSMUST00000118326.7	243300	Nyap1	mm10_genes_exons	chr5:137731904
chr17	26008082	26008082	1	*	58.4052648817477	chr17	26004645	26008854	4210	-	intron:617908	ENSMUST00000118828.7	215445	Rab11fip3	mm10_genes_introns	chr17:26008082
chr19	55556568	55556568	1	*	-48.06019840265219	chr19	55499305	55576473	77169	+	intron:657598	ENSMUST00000225529.1	53611	Vti1a	mm10_genes_introns	chr19:55556568
chr1	178911656	178911656	1	*	-71.21879533760395	chr1	178884075	178913688	29614	+	intron:20010	ENSMUST00000161017.7	269152	Kif26b	mm10_genes_introns	chr1:178911656
chr2	91175256	91175256	1	*	-55.42122453561653	chr2	91173194	91175642	2449	-	intron:88331	ENSMUST00000111373.7	228355	Madd	mm10_genes_introns	chr2:91175256
chr2	166637096	166637096	1	*	60.79060960241173	chr2	166633468	166638314	4847	-	intron:100988	ENSMUST00000036719.11	277360	Prex1	mm10_genes_introns	chr2:166637096
chr2	166637116	166637116	1	*	60.79060960241173	chr2	166633468	166638314	4847	-	intron:100988	ENSMUST00000036719.11	277360	Prex1	mm10_genes_introns	chr2:166637116
chr17	34612255	34612255	1	*	52.59031134474752	chr17	34612253	34612443	191	+	exon:726904	ENSMUST00000173973.7	55979	Agpat1	mm10_genes_exons	chr17:34612255
chr17	28821478	28821478	1	*	54.892674754421165	chr17	28817639	28821638	4000	+	1to5kb:121234	ENSMUST00000144022.8	268936	Brpf3	mm10_genes_1to5kb	chr17:28821478
chr4	117403570	117403570	1	*	54.75950635603728	chr4	117307679	117489588	181910	-	intron:165245	ENSMUST00000030439.14	66743	Rnf220	mm10_genes_introns	chr4:117403570
chr10	84378174	84378174	1	*	-35.327588510291555	chr10	84378092	84378224	133	-	exon:497977	ENSMUST00000020220.14	77976	Nuak1	mm10_genes_exons	chr10:84378174
chr4	126463727	126463727	1	*	56.52679971852565	chr4	126462783	126466782	4000	-	1to5kb:32720	ENSMUST00000127800.1	236511	Ago1	mm10_genes_1to5kb	chr4:126463727
chr15	84237454	84237454	1	*	-55.371547910017306	chr15	84232187	84271230	39044	+	intron:552224	ENSMUST00000023072.6	170736	Parvb	mm10_genes_introns	chr15:84237454
chr6	97568591	97568591	1	*	66.27552116048811	chr6	97528852	97617189	88338	-	intron:250211	ENSMUST00000113355.8	232288	Frmd4b	mm10_genes_introns	chr6:97568591
chr7	107209962	107209962	1	*	-53.8624188247679	chr7	107209445	107210916	1472	+	exon:331200	ENSMUST00000098135.1	76572	Rbmxl2	mm10_genes_exons	chr7:107209962
chr5	131720105	131720105	1	*	70.57894340076955	chr5	131533873	131770759	236887	-	intron:217532	ENSMUST00000161226.8	319974	Auts2	mm10_genes_introns	chr5:131720105
chr2	179488865	179488865	1	*	58.254144507923975	chr2	179444812	179780253	335442	+	intron:71072	ENSMUST00000000314.12	12561	Cdh4	mm10_genes_introns	chr2:179488865
chr7	16432801	16432801	1	*	-63.64797871402883	chr7	16432774	16433022	249	+	exon:312278	ENSMUST00000098789.4	330474	Zc3h4	mm10_genes_exons	chr7:16432801
chr3	108940526	108940526	1	*	53.5579922143018	chr3	108940311	108941310	1000	+	promoter:22082	ENSMUST00000196400.4	66715	Henmt1	mm10_genes_promoters	chr3:108940526
chr16	41408704	41408704	1	*	-71.55667651999454	chr16	40786061	41533452	747392	+	intron:579136	ENSMUST00000187695.6	268890	Lsamp	mm10_genes_introns	chr16:41408704
chr19	47130871	47130871	1	*	-55.138890392943075	chr19	47130639	47131865	1227	+	exon:789414	ENSMUST00000072141.3	18572	Pdcd11	mm10_genes_exons	chr19:47130871
chr9	71638242	71638242	1	*	-44.39859218650326	chr9	71632682	71641358	8677	-	intron:377688	ENSMUST00000072899.8	68178	Cgnl1	mm10_genes_introns	chr9:71638242
chr9	69368081	69368081	1	*	-49.58046911668246	chr9	69364562	69371214	6653	+	intron:355717	ENSMUST00000034766.13	19883	Rora	mm10_genes_introns	chr9:69368081
chr12	105453215	105453215	1	*	59.932881249969384	chr12	105452856	105453855	1000	+	promoter:95532	ENSMUST00000178224.1	268595	D430019H16Rik	mm10_genes_promoters	chr12:105453215
chr5	114950803	114950803	1	*	-48.68102004062065	chr5	114950694	114950838	145	-	exon:255038	ENSMUST00000031535.11	21405	Hnf1a	mm10_genes_exons	chr5:114950803
chr1	188995897	188995897	1	*	-55.87914147095348	chr1	188995089	188996540	1452	-	exon:51609	ENSMUST00000193273.1	226823	Kctd3	mm10_genes_exons	chr1:188995897
chrX	168964227	168964227	1	*	70.02075963687595	chrX	168796812	169220197	423386	+	intron:683443	ENSMUST00000033721.12	11856	Arhgap6	mm10_genes_introns	chrX:168964227
chr12	108532797	108532797	1	*	58.360997835734175	chr12	108529811	108533810	4000	+	1to5kb:95601	ENSMUST00000148186.1	68519	Eml1	mm10_genes_1to5kb	chr12:108532797
chr2	60766131	60766131	1	*	-50.14445309222593	chr2	60763322	60767321	4000	-	1to5kb:15839	ENSMUST00000123046.7	56878	Rbms1	mm10_genes_1to5kb	chr2:60766131
chr10	60623055	60623055	1	*	-53.119307055304034	chr10	60597759	60650089	52331	-	intron:408629	ENSMUST00000073242.10	22295	Cdh23	mm10_genes_introns	chr10:60623055
chr10	119410836	119410836	1	*	-53.80640560710389	chr10	119408444	119412443	4000	+	1to5kb:81030	ENSMUST00000185238.1	67081	1700025F24Rik	mm10_genes_1to5kb	chr10:119410836
chr7	4642168	4642168	1	*	-60.216188799020685	chr7	4641164	4645163	4000	-	1to5kb:57151	ENSMUST00000206768.1	243819	Ppp6r1	mm10_genes_1to5kb	chr7:4642168
chr8	92360888	92360888	1	*	46.709727985334304	chr8	92357121	92361120	4000	-	1to5kb:68977	ENSMUST00000034183.9	71296	Crnde	mm10_genes_1to5kb	chr8:92360888
chr14	78671460	78671460	1	*	44.46660615841548	chr14	78653797	78724906	71110	-	intron:541650	ENSMUST00000226342.2	380921	Dgkh	mm10_genes_introns	chr14:78671460
chr3	28588015	28588015	1	*	58.96729571627477	chr3	28577574	28594021	16448	+	intron:104163	ENSMUST00000160934.7	665113	Tnik	mm10_genes_introns	chr3:28588015
chr13	109921497	109921497	1	*	-42.20203771229711	chr13	109917911	109921910	4000	+	1to5kb:101206	ENSMUST00000151429.1	238871	Pde4d	mm10_genes_1to5kb	chr13:109921497
chr2	181153042	181153042	1	*	40.808045630675934	chr2	181152784	181153080	297	-	exon:122284	ENSMUST00000055990.7	13628	Eef1a2	mm10_genes_exons	chr2:181153042
chr2	90444187	90444187	1	*	-55.889261493357104	chr2	90440786	90444419	3634	-	intron:88155	ENSMUST00000111495.8	19271	Ptprj	mm10_genes_introns	chr2:90444187
chr10	79948712	79948712	1	*	-59.66164230896176	chr10	79946558	79948859	2302	+	intron:396154	ENSMUST00000019708.11	13496	Arid3a	mm10_genes_introns	chr10:79948712
chr14	121569230	121569230	1	*	49.72400436507438	chr14	121562178	121575912	13735	-	intron:543292	ENSMUST00000212376.2	105445	Dock9	mm10_genes_introns	chr14:121569230
chr12	52920866	52920866	1	*	51.39116741676939	chr12	52911924	52937134	25211	+	intron:473674	ENSMUST00000095737.4	238161	Akap6	mm10_genes_introns	chr12:52920866
chr4	124707146	124707146	1	*	-53.11226393506434	chr4	124706059	124707253	1195	+	intron:147116	ENSMUST00000106199.9	14201	Fhl3	mm10_genes_introns	chr4:124707146
chr13	56104567	56104567	1	*	50.1532498490032	chr13	56104500	56104888	389	-	intron:508574	ENSMUST00000016081.12	26914	Macroh2a1	mm10_genes_introns	chr13:56104567
chr13	56104570	56104570	1	*	50.1532498490032	chr13	56104500	56104888	389	-	intron:508574	ENSMUST00000016081.12	26914	Macroh2a1	mm10_genes_introns	chr13:56104570
chr4	11578578	11578578	1	*	51.66563034278365	chr4	11574665	11578664	4000	+	1to5kb:26622	ENSMUST00000180239.1	100503583	Fsbp	mm10_genes_1to5kb	chr4:11578578
chrX	103980249	103980249	1	*	43.892111703832434	chrX	103979335	103981072	1738	-	intron:690899	ENSMUST00000070705.5	19820	Rlim	mm10_genes_introns	chrX:103980249
chr4	140077809	140077809	1	*	-57.14824785398969	chr4	140067256	140107254	39999	-	intron:171298	ENSMUST00000039331.8	230868	Igsf21	mm10_genes_introns	chr4:140077809
chr7	112686863	112686863	1	*	53.59595612336398	chr7	112686698	112690697	4000	+	1to5kb:55439	ENSMUST00000171373.1	21676	Tead1	mm10_genes_1to5kb	chr7:112686863
chr1	156108576	156108576	1	*	-48.25869855484118	chr1	156087887	156204829	116943	-	intron:38436	ENSMUST00000015628.3	329274	Fam163a	mm10_genes_introns	chr1:156108576
chr2	68248504	68248504	1	*	-50.924832039543034	chr2	68220969	68263234	42266	-	intron:83562	ENSMUST00000102715.3	53416	Stk39	mm10_genes_introns	chr2:68248504
chr9	47663622	47663622	1	*	73.08897927787245	chr9	47530506	47787970	257465	+	intron:351576	ENSMUST00000114548.7	54725	Cadm1	mm10_genes_introns	chr9:47663622
chrX	9480816	9480816	1	*	-54.79701552760633	chrX	9469305	9487714	18410	-	intron:684367	ENSMUST00000170885.1	13058	Cybb	mm10_genes_introns	chrX:9480816
chr18	68062463	68062463	1	*	-62.34220619851458	chr18	67933389	68064216	130828	+	intron:638079	ENSMUST00000063775.4	52662	Ldlrad4	mm10_genes_introns	chr18:68062463
chr5	115438245	115438245	1	*	-50.031964047093325	chr5	115435547	115438712	3166	+	intron:190902	ENSMUST00000150779.7	17690	Msi1	mm10_genes_introns	chr5:115438245
chr9	106485337	106485337	1	*	-52.947525080692984	chr9	106485252	106485424	173	+	exon:433909	ENSMUST00000047721.9	27966	Rrp9	mm10_genes_exons	chr9:106485337
chr15	78680409	78680409	1	*	-65.8399959548868	chr15	78674741	78717986	43246	-	intron:563910	ENSMUST00000229441.1	207393	Elfn2	mm10_genes_introns	chr15:78680409
chr2	125749239	125749239	1	*	57.51893204674763	chr2	125747606	125750278	2673	-	intron:94861	ENSMUST00000053699.12	70354	Secisbp2l	mm10_genes_introns	chr2:125749239
chr15	78081933	78081933	1	*	-68.69973173438649	chr15	78013397	78118680	105284	-	intron:563724	ENSMUST00000019290.2	12300	Cacng2	mm10_genes_introns	chr15:78081933
chrX	51204958	51204958	1	*	-50.04169478709963	chrX	51139369	51205773	66405	-	intron:686657	ENSMUST00000114875.7	171170	Mbnl3	mm10_genes_introns	chrX:51204958
chr8	12776385	12776385	1	*	-55.811318820151236	chr8	12757353	12806649	49297	+	intron:314682	ENSMUST00000033818.9	50770	Atp11a	mm10_genes_introns	chr8:12776385
chr4	53036942	53036942	1	*	-33.43032827217317	chr4	53036873	53036976	104	-	exon:190229	ENSMUST00000030010.3	11303	Abca1	mm10_genes_exons	chr4:53036942
chr2	164787931	164787931	1	*	-47.1775838589833	chr2	164785411	164789410	4000	+	1to5kb:13480	ENSMUST00000173945.1	101113	Snx21	mm10_genes_1to5kb	chr2:164787931
chr8	60660035	60660035	1	*	71.34677663788912	chr8	60633059	60671023	37965	+	intron:319339	ENSMUST00000161421.1	71306	Mfap3l	mm10_genes_introns	chr8:60660035
chrX	129749674	129749674	1	*	65.15397099639993	chrX	129748742	129749741	1000	+	promoter:136801	ENSMUST00000127577.7	54004	Diaph2	mm10_genes_promoters	chrX:129749674
chr13	60615508	60615508	1	*	-54.23969341814914	chr13	60602597	60696230	93634	+	intron:498555	ENSMUST00000226059.1	69635	Dapk1	mm10_genes_introns	chr13:60615508
chr11	73039687	73039687	1	*	58.55427430845743	chr11	73038516	73040220	1705	+	intron:430777	ENSMUST00000155720.1	55984	Camkk1	mm10_genes_introns	chr11:73039687
chr10	80886322	80886322	1	*	-59.29324527813482	chr10	80886180	80887383	1204	+	intron:397219	ENSMUST00000219817.1	432478	Tmprss9	mm10_genes_introns	chr10:80886322
chr11	120270191	120270191	1	*	51.76890079672716	chr11	120268430	120271358	2929	+	intron:443634	ENSMUST00000122148.7	268515	Bahcc1	mm10_genes_introns	chr11:120270191
chr8	83290604	83290604	1	*	52.63711808994892	chr8	83290352	83290708	357	+	exon:388279	ENSMUST00000034146.4	22227	Ucp1	mm10_genes_exons	chr8:83290604
chr9	43225544	43225544	1	*	57.851474141188	chr9	43225093	43226092	1000	-	promoter:75194	ENSMUST00000215387.1	102644	Oaf	mm10_genes_promoters	chr9:43225544
chr9	21686089	21686089	1	*	-56.37173235326463	chr9	21686022	21686275	254	+	exon:418499	ENSMUST00000034707.14	20586	Smarca4	mm10_genes_exons	chr9:21686089
chr12	111413177	111413177	1	*	-44.92658521347852	chr12	111412017	111416016	4000	+	1to5kb:95883	ENSMUST00000222126.1	74190	Exoc3l4	mm10_genes_1to5kb	chr12:111413177
chr18	65577576	65577576	1	*	52.12934445703931	chr18	65574912	65578911	4000	+	1to5kb:128490	ENSMUST00000235822.1	328977	Zfp532	mm10_genes_1to5kb	chr18:65577576
chr9	121764059	121764059	1	*	-61.47589223558422	chr9	121762082	121766081	4000	+	1to5kb:74037	ENSMUST00000213743.1	270210	Zfp651	mm10_genes_1to5kb	chr9:121764059
chr5	115126362	115126362	1	*	55.11816888696097	chr5	115125501	115127010	1510	-	intron:213642	ENSMUST00000060798.5	106840	Unc119b	mm10_genes_introns	chr5:115126362
chr17	28228129	28228129	1	*	-44.27424346192722	chr17	28227700	28231699	4000	+	1to5kb:121146	ENSMUST00000002320.15	19015	Ppard	mm10_genes_1to5kb	chr17:28228129
chr9	118694481	118694481	1	*	-54.652512408517765	chr9	118689425	118698313	8889	+	intron:365145	ENSMUST00000044165.13	104099	Itga9	mm10_genes_introns	chr9:118694481
chr18	58140824	58140824	1	*	51.81499245236295	chr18	58124342	58148990	24649	-	intron:644718	ENSMUST00000025497.7	14119	Fbn2	mm10_genes_introns	chr18:58140824
chr1	86389892	86389892	1	*	45.251464720665794	chr1	86389345	86390344	1000	-	promoter:6050	ENSMUST00000212058.1	14767	Nmur1	mm10_genes_promoters	chr1:86389892
chr16	89837466	89837466	1	*	-48.122571155986414	chr16	89833235	89837758	4524	-	intron:592169	ENSMUST00000114122.7	21844	Tiam1	mm10_genes_introns	chr16:89837466
chr14	105503075	105503075	1	*	-50.16904492943812	chr14	105502576	105503575	1000	+	promoter:107202	ENSMUST00000188698.1	74864	4930449E01Rik	mm10_genes_promoters	chr14:105503075
chr14	119858111	119858111	1	*	47.39273200692789	chr14	119139119	119868885	729767	+	intron:528832	ENSMUST00000065904.4	50787	Hs6st3	mm10_genes_introns	chr14:119858111
chr7	118602195	118602195	1	*	53.07733100798588	chr7	118600308	118623002	22695	+	intron:277127	ENSMUST00000098088.10	74424	Tmc5	mm10_genes_introns	chr7:118602195
chr10	81364155	81364155	1	*	50.868035963782674	chr10	81363770	81366225	2456	+	exon:477883	ENSMUST00000044844.8	73822	Mfsd12	mm10_genes_exons	chr10:81364155
chr10	120007448	120007448	1	*	-40.49757065869477	chr10	120000672	120010205	9534	+	intron:401398	ENSMUST00000077871.13	74053	Grip1	mm10_genes_introns	chr10:120007448
chr11	106590384	106590384	1	*	42.75674939184187	chr11	106568628	106612857	44230	-	intron:464350	ENSMUST00000042780.13	21763	Tex2	mm10_genes_introns	chr11:106590384
chr7	19857953	19857953	1	*	-62.943324672328835	chr7	19857237	19861236	4000	-	1to5kb:58048	ENSMUST00000208198.1	330483	Ceacam16	mm10_genes_1to5kb	chr7:19857953
chr17	25937161	25937161	1	*	41.01766877551556	chr17	25936835	25937834	1000	-	promoter:124422	ENSMUST00000135253.2	14755	Pigq	mm10_genes_promoters	chr17:25937161
chr4	138834965	138834965	1	*	39.905549133165295	chr4	138834750	138835183	434	+	exon:180766	ENSMUST00000077582.13	18780	Pla2g2a	mm10_genes_exons	chr4:138834965
chr7	81594676	81594676	1	*	-46.57740099036337	chr7	81594121	81595886	1766	+	intron:271879	ENSMUST00000165460.1	434204	Whamm	mm10_genes_introns	chr7:81594676
chr11	115290955	115290955	1	*	-62.685424435237245	chr11	115286299	115296537	10239	-	intron:465777	ENSMUST00000056153.7	328035	Fads6	mm10_genes_introns	chr11:115290955
chr7	143325264	143325264	1	*	66.52236255337768	chr7	143261377	143358709	97333	+	intron:285176	ENSMUST00000009689.10	16535	Kcnq1	mm10_genes_introns	chr7:143325264
chrX	41401869	41401869	1	*	55.56719114875618	chrX	41401740	41402739	1000	+	promoter:135540	ENSMUST00000124169.1	53623	Gria3	mm10_genes_promoters	chrX:41401869
chrX	41401905	41401905	1	*	55.56719114875618	chrX	41401740	41402739	1000	+	promoter:135540	ENSMUST00000124169.1	53623	Gria3	mm10_genes_promoters	chrX:41401905
chr11	76463557	76463557	1	*	-70.55112907962317	chr11	76463528	76463668	141	-	exon:547560	ENSMUST00000094012.10	109934	Abr	mm10_genes_exons	chr11:76463557
chr11	102438675	102438675	1	*	52.20814791734429	chr11	102436981	102438909	1929	-	exon:555652	ENSMUST00000049057.4	217219	Fam171a2	mm10_genes_exons	chr11:102438675
chr1	37218761	37218761	1	*	-49.212017967057264	chr1	37218205	37219204	1000	+	promoter:528	ENSMUST00000027288.9	12790	Cnga3	mm10_genes_promoters	chr1:37218761
chr9	48758328	48758328	1	*	-47.12423108280718	chr9	48743562	48831742	88181	-	intron:373588	ENSMUST00000093852.4	235320	Zbtb16	mm10_genes_introns	chr9:48758328
chr4	152561099	152561099	1	*	-54.365802792519126	chr4	152560350	152561177	828	+	intron:153792	ENSMUST00000142027.7	260305	Nphp4	mm10_genes_introns	chr4:152561099
chr16	22571311	22571311	1	*	-53.1365315707292	chr16	22570223	22571670	1448	-	intron:587313	ENSMUST00000089925.9	110197	Dgkg	mm10_genes_introns	chr16:22571311
chr11	115394122	115394122	1	*	47.71422721007351	chr11	115393346	115396132	2787	+	exon:529709	ENSMUST00000053288.5	237988	Cdr2l	mm10_genes_exons	chr11:115394122
chrX	140062072	140062072	1	*	64.2571730249638	chrX	140061879	140062878	1000	+	promoter:137006	ENSMUST00000044806.2	331537	Pih1h3b	mm10_genes_promoters	chrX:140062072
chr9	21453089	21453089	1	*	-41.46533474942956	chr9	21452107	21456106	4000	+	1to5kb:70446	ENSMUST00000172873.1	13430	Dnm2	mm10_genes_1to5kb	chr9:21453089
chr7	144592036	144592036	1	*	-59.16767485233518	chr7	144590266	144592700	2435	-	intron:312839	ENSMUST00000121758.7	101772	Ano1	mm10_genes_introns	chr7:144592036
chr8	125619692	125619692	1	*	53.01249528840628	chr8	125585175	125624255	39081	+	intron:331195	ENSMUST00000213085.1	75930	4930567H12Rik	mm10_genes_introns	chr8:125619692
chr1	75507337	75507337	1	*	42.667435163208054	chr1	75506362	75507361	1000	-	promoter:5814	ENSMUST00000113567.8	98733	Obsl1	mm10_genes_promoters	chr1:75507337
chr2	156998074	156998074	1	*	-51.90931344835096	chr2	156997755	156998719	965	-	intron:99275	ENSMUST00000103129.8	66934	Dsn1	mm10_genes_introns	chr2:156998074
chr6	124745291	124745291	1	*	-51.73659976908299	chr6	124741696	124745695	4000	-	1to5kb:50118	ENSMUST00000129823.1	14790	Grcc10	mm10_genes_1to5kb	chr6:124745291
chr15	94553930	94553930	1	*	41.05365760753361	chr15	94553835	94554017	183	+	exon:665860	ENSMUST00000074936.9	266632	Irak4	mm10_genes_exons	chr15:94553930
chr5	33210633	33210633	1	*	52.70636133276603	chr5	33200603	33214287	13685	-	intron:203513	ENSMUST00000200884.1	100689	Spon2	mm10_genes_introns	chr5:33210633
chr3	108204603	108204603	1	*	-51.74417521841257	chr3	108201835	108205834	4000	-	1to5kb:25436	ENSMUST00000106655.1	72023	Cyb561d1	mm10_genes_1to5kb	chr3:108204603
chr13	37847821	37847821	1	*	-45.16228125310534	chr13	37778558	37888870	110313	+	intron:495880	ENSMUST00000122842.7	68750	Rreb1	mm10_genes_introns	chr13:37847821
chr5	120462994	120462994	1	*	66.4603549500943	chr5	120462886	120463031	146	-	intron:214083	ENSMUST00000052258.13	257635	Sdsl	mm10_genes_introns	chr5:120462994
chr2	165901048	165901048	1	*	69.39754799867632	chr2	165897951	165901950	4000	-	1to5kb:18994	ENSMUST00000109262.7	228880	Zmynd8	mm10_genes_1to5kb	chr2:165901048
chr1	91338537	91338537	1	*	-52.22613233710482	chr1	91334822	91340508	5687	+	intron:11253	ENSMUST00000088904.9	227357	Espnl	mm10_genes_introns	chr1:91338537
chr7	62464232	62464232	1	*	-45.75873608299587	chr7	62461871	62464510	2640	-	exon:358913	ENSMUST00000094339.2	27412	Peg12	mm10_genes_exons	chr7:62464232
chr10	127750330	127750330	1	*	-56.2242351693254	chr10	127747276	127751096	3821	-	exon:503475	ENSMUST00000079692.5	11536	Gpr182	mm10_genes_exons	chr10:127750330
chr8	70112899	70112899	1	*	-53.33985829449228	chr8	70112726	70112900	175	-	exon:405864	ENSMUST00000002412.8	13004	Ncan	mm10_genes_exons	chr8:70112899
chr17	3485986	3485986	1	*	-51.04800449817437	chr17	3485463	3489462	4000	+	1to5kb:119946	ENSMUST00000226434.1	24001	Tiam2	mm10_genes_1to5kb	chr17:3485986
chr10	75589870	75589870	1	*	61.06489650170872	chr10	75589340	75589882	543	+	exon:474662	ENSMUST00000219247.1	23887	Ggt5	mm10_genes_exons	chr10:75589870
chr15	79306624	79306624	1	*	-40.59874788442147	chr15	79305716	79306715	1000	-	promoter:114191	ENSMUST00000173412.1	53357	Pla2g6	mm10_genes_promoters	chr15:79306624
chr11	72205300	72205300	1	*	57.56094428599423	chr11	72202547	72206546	4000	+	1to5kb:86573	ENSMUST00000021158.3	52700	Txndc17	mm10_genes_1to5kb	chr11:72205300
chr2	131918053	131918053	1	*	-46.473756716369266	chr2	131918028	131918158	131	+	exon:76472	ENSMUST00000142070.1	19122	Prnp	mm10_genes_exons	chr2:131918053
chr7	112681268	112681268	1	*	49.19778548957285	chr7	112679727	112759383	79657	+	intron:276667	ENSMUST00000084705.11	21676	Tead1	mm10_genes_introns	chr7:112681268
chrX	100768345	100768345	1	*	44.40407840749465	chrX	100767722	100768428	707	+	exon:814294	ENSMUST00000000901.12	53310	Dlg3	mm10_genes_exons	chrX:100768345
chr4	74023283	74023283	1	*	42.16385915389726	chr4	74013917	74074044	60128	+	intron:140781	ENSMUST00000098006.8	242506	Frmd3	mm10_genes_introns	chr4:74023283
chr5	147631031	147631031	1	*	-52.283891476394984	chr5	147615261	147634376	19116	-	intron:222302	ENSMUST00000031653.11	14254	Flt1	mm10_genes_introns	chr5:147631031
chrX	151803461	151803461	1	*	43.64265336057351	chrX	151802658	151803657	1000	+	promoter:137231	ENSMUST00000156616.8	59026	Huwe1	mm10_genes_promoters	chrX:151803461
chr13	53202599	53202599	1	*	51.677981915954305	chr13	53146712	53285465	138754	-	intron:507874	ENSMUST00000130235.7	26564	Ror2	mm10_genes_introns	chr13:53202599
chrX	7657249	7657249	1	*	-37.71370921783446	chrX	7656260	7657259	1000	+	promoter:135016	ENSMUST00000033485.13	54630	Prickle3	mm10_genes_promoters	chrX:7657249
chr2	174671031	174671031	1	*	67.29038361158413	chr2	174657810	174704022	46213	+	intron:70750	ENSMUST00000059452.5	100043757	Zfp831	mm10_genes_introns	chr2:174671031
chr10	121421021	121421021	1	*	63.63439146828163	chr10	121417193	121476002	58810	-	intron:417893	ENSMUST00000026902.8	192678	Rassf3	mm10_genes_introns	chr10:121421021
chr15	32243604	32243604	1	*	-68.39937573753956	chr15	32239810	32243809	4000	+	1to5kb:110658	ENSMUST00000226876.1	20356	Sema5a	mm10_genes_1to5kb	chr15:32243604
chr8	122337071	122337071	1	*	-55.66503871053643	chr8	122335432	122337251	1820	+	exon:396747	ENSMUST00000054052.14	22761	Zfpm1	mm10_genes_exons	chr8:122337071
chr5	123258182	123258182	1	*	49.270296475681555	chr5	123256247	123262016	5770	+	intron:193342	ENSMUST00000121964.7	269701	Wdr66	mm10_genes_introns	chr5:123258182
chr2	153071609	153071609	1	*	-42.235644158608224	chr2	153071017	153071757	741	+	intron:65877	ENSMUST00000127898.8	228788	Ccm2l	mm10_genes_introns	chr2:153071609
chr10	127177304	127177304	1	*	-41.844013518466355	chr10	127176990	127177989	1000	-	promoter:84353	ENSMUST00000218658.1	216441	Slc26a10	mm10_genes_promoters	chr10:127177304
chr18	56731368	56731368	1	*	63.42722893327656	chr18	56731141	56733211	2071	+	intron:636084	ENSMUST00000025486.8	16906	Lmnb1	mm10_genes_introns	chr18:56731368
chrX	60893077	60893077	1	*	61.74955698588613	chrX	60891366	60893430	2065	-	exon:825665	ENSMUST00000135107.3	20675	Sox3	mm10_genes_exons	chrX:60893077
chr10	121096770	121096770	1	*	-56.740509614542724	chr10	121096737	121099757	3021	+	intron:401768	ENSMUST00000020439.10	24117	Wif1	mm10_genes_introns	chr10:121096770
chr4	125512566	125512566	1	*	52.536340656946734	chr4	125490946	125623480	132535	+	intron:147367	ENSMUST00000030676.7	14807	Grik3	mm10_genes_introns	chr4:125512566
chr11	84032301	84032301	1	*	-41.01228868484423	chr11	84026767	84039210	12444	+	intron:434635	ENSMUST00000049714.14	217030	Synrg	mm10_genes_introns	chr11:84032301
chr8	108402677	108402677	1	*	-49.88984446516488	chr8	108325298	108517645	192348	+	intron:328090	ENSMUST00000220518.1	11906	Zfhx3	mm10_genes_introns	chr8:108402677
chr8	11458709	11458709	1	*	54.73933104391078	chr8	11454527	11478327	23801	-	intron:332464	ENSMUST00000033900.6	19332	Rab20	mm10_genes_introns	chr8:11458709
chr10	70138639	70138639	1	*	50.387260150520774	chr10	70097582	70142578	44997	+	intron:393653	ENSMUST00000147545.7	76551	Ccdc6	mm10_genes_introns	chr10:70138639
chr15	101930688	101930688	1	*	46.83288767984926	chr15	101930678	101930898	221	-	exon:685525	ENSMUST00000023799.7	223917	Krt79	mm10_genes_exons	chr15:101930688
chr11	82194169	82194169	1	*	45.48830576329902	chr11	82178134	82196746	18613	-	intron:457376	ENSMUST00000138333.1	20290	Ccl1	mm10_genes_introns	chr11:82194169
chr13	113815860	113815860	1	*	56.2396801773847	chr13	113794697	113922246	127550	+	intron:502764	ENSMUST00000091201.6	218639	Arl15	mm10_genes_introns	chr13:113815860
chr12	83105608	83105608	1	*	-67.37775258048453	chr12	83101787	83105786	4000	+	1to5kb:94896	ENSMUST00000201767.1	50779	Rgs6	mm10_genes_1to5kb	chr12:83105608
chr7	101382718	101382718	1	*	-59.56152826782226	chr7	101381827	101382826	1000	+	promoter:54842	ENSMUST00000152082.7	69710	Arap1	mm10_genes_promoters	chr7:101382718
chr10	63136091	63136091	1	*	-53.62225289391047	chr10	63135708	63136295	588	-	exon:492718	ENSMUST00000095580.2	68802	Mypn	mm10_genes_exons	chr10:63136091
chr15	79135627	79135627	1	*	43.65687434742268	chr15	79133000	79136900	3901	+	exon:662155	ENSMUST00000040320.9	27008	Micall1	mm10_genes_exons	chr15:79135627
chr16	7037691	7037691	1	*	-51.37480679368864	chr16	6809249	7224310	415062	+	intron:571662	ENSMUST00000230658.1	268859	Rbfox1	mm10_genes_introns	chr16:7037691
chr8	105996227	105996227	1	*	53.65861197799609	chr8	105992750	105996749	4000	-	1to5kb:69369	ENSMUST00000117555.7	319446	Dpep2	mm10_genes_1to5kb	chr8:105996227
chr17	86515071	86515071	1	*	43.379058598859984	chr17	86496112	86559150	63039	+	intron:612386	ENSMUST00000097275.8	18754	Prkce	mm10_genes_introns	chr17:86515071
chr11	69162978	69162978	1	*	-45.72602562013671	chr11	69162893	69162985	93	+	exon:514631	ENSMUST00000036424.2	11686	Alox12b	mm10_genes_exons	chr11:69162978
chr19	47130831	47130831	1	*	-53.46329325192152	chr19	47130639	47131865	1227	+	exon:789414	ENSMUST00000072141.3	18572	Pdcd11	mm10_genes_exons	chr19:47130831
chr15	25812592	25812592	1	*	-62.95991997745596	chr15	25812121	25813673	1553	+	exon:656112	ENSMUST00000110457.7	17909	Myo10	mm10_genes_exons	chr15:25812592
chr19	30174168	30174168	1	*	-52.58551346055088	chr19	30158650	30174423	15774	-	intron:665294	ENSMUST00000025778.8	104174	Gldc	mm10_genes_introns	chr19:30174168
chr9	110638332	110638332	1	*	50.9117543814322	chr9	110635450	110639449	4000	-	1to5kb:77645	ENSMUST00000123996.1	235627	Nbeal2	mm10_genes_1to5kb	chr9:110638332
chr17	55969467	55969467	1	*	-62.08908593443091	chr17	55969467	55970466	1000	+	promoter:122763	ENSMUST00000044216.7	20420	Shd	mm10_genes_promoters	chr17:55969467
chr3	99885408	99885408	1	*	51.2186522663771	chr3	99884417	99885416	1000	+	promoter:21694	ENSMUST00000164539.1	74362	Spag17	mm10_genes_promoters	chr3:99885408
chr10	61301107	61301107	1	*	-53.7098948437355	chr10	61300483	61302800	2318	+	intron:392055	ENSMUST00000219375.1	18646	Prf1	mm10_genes_introns	chr10:61301107
chr5	142694608	142694608	1	*	45.85304781951724	chr5	142692585	142705355	12771	+	intron:197359	ENSMUST00000198728.4	243328	Slc29a4	mm10_genes_introns	chr5:142694608
chr3	89367604	89367604	1	*	44.383329014153674	chr3	89366254	89370253	4000	-	1to5kb:24533	ENSMUST00000070820.6	77772	Dcst1	mm10_genes_1to5kb	chr3:89367604
chr7	81025073	81025073	1	*	56.58380955081286	chr7	81023271	81025509	2239	+	exon:325965	ENSMUST00000107353.2	233410	Zfp592	mm10_genes_exons	chr7:81025073
chr6	122512914	122512914	1	*	-47.255195521930794	chr6	122512583	122513582	1000	+	promoter:46375	ENSMUST00000032210.13	50530	Mfap5	mm10_genes_promoters	chr6:122512914
chr12	111770538	111770538	1	*	52.16549127406807	chr12	111767319	111771318	4000	+	1to5kb:95951	ENSMUST00000120544.8	16593	Klc1	mm10_genes_1to5kb	chr12:111770538
chrX	48453949	48453949	1	*	-42.76584811675471	chrX	48453872	48454169	298	-	5UTR:93488	ENSMUST00000114958.7	56501	Elf4	mm10_genes_5UTRs	chrX:48453949
chr15	7187639	7187639	1	*	-48.85965590009363	chr15	7187028	7188074	1047	+	intron:544418	ENSMUST00000067190.11	16880	Lifr	mm10_genes_introns	chr15:7187639
chr11	79057731	79057731	1	*	-53.781754134514856	chr11	79057628	79058627	1000	-	promoter:91256	ENSMUST00000129463.1	16706	Ksr1	mm10_genes_promoters	chr11:79057731
chr1	164144749	164144749	1	*	-51.94357504359242	chr1	164141763	164145762	4000	+	1to5kb:3346	ENSMUST00000162102.1	20344	Selp	mm10_genes_1to5kb	chr1:164144749
chr17	30118928	30118928	1	*	-56.280947894521084	chr17	30060851	30135322	74472	+	intron:601379	ENSMUST00000226208.2	21769	Zfand3	mm10_genes_introns	chr17:30118928
chr7	46420726	46420726	1	*	53.1631536042015	chr7	46417680	46421679	4000	+	1to5kb:53517	ENSMUST00000160234.1	16502	Kcnc1	mm10_genes_1to5kb	chr7:46420726
chr8	105700311	105700311	1	*	-35.02933320360303	chr8	105700148	105701147	1000	+	promoter:66238	ENSMUST00000212634.1	56513	Pard6a	mm10_genes_promoters	chr8:105700311
chr10	75484688	75484688	1	*	-47.540403592094634	chr10	75420797	75509591	88795	-	intron:410475	ENSMUST00000145890.7	68778	Gucd1	mm10_genes_introns	chr10:75484688
chr14	69932847	69932847	1	*	-54.13727185157129	chr14	69851755	69963439	111685	+	intron:527046	ENSMUST00000022678.4	73523	Pebp4	mm10_genes_introns	chr14:69932847
chr1	139163474	139163474	1	*	-65.55284100937851	chr1	139144001	139167670	23670	+	intron:15710	ENSMUST00000168527.7	329260	Dennd1b	mm10_genes_introns	chr1:139163474
chr10	9674265	9674265	1	*	57.348407335755994	chr10	9629050	9674504	45455	-	intron:404516	ENSMUST00000100070.4	320825	Samd5	mm10_genes_introns	chr10:9674265
chr14	66265479	66265479	1	*	-51.46272741016305	chr14	66213553	66280882	67330	-	intron:539877	ENSMUST00000022622.13	19229	Ptk2b	mm10_genes_introns	chr14:66265479
chr13	51442762	51442762	1	*	42.342380964119016	chr13	51442690	51442985	296	-	exon:610322	ENSMUST00000021898.5	20418	Shc3	mm10_genes_exons	chr13:51442762
chr19	6938234	6938234	1	*	65.55580411933133	chr19	6936861	6940860	4000	+	1to5kb:131136	ENSMUST00000025910.12	12015	Bad	mm10_genes_1to5kb	chr19:6938234
chr15	80147617	80147617	1	*	-48.771954984792416	chr15	80133189	80148226	15038	+	intron:550846	ENSMUST00000230479.1	66513	Tab1	mm10_genes_introns	chr15:80147617
chr6	122743581	122743581	1	*	-40.77887086507959	chr6	122742746	122743745	1000	-	promoter:50024	ENSMUST00000032476.10	20527	Slc2a3	mm10_genes_promoters	chr6:122743581
chr7	100942909	100942909	1	*	-48.755057556552394	chr7	100940019	100964218	24200	-	intron:303203	ENSMUST00000060174.5	233571	P2ry6	mm10_genes_introns	chr7:100942909
chr4	46717232	46717232	1	*	-60.97713018786799	chr4	46684383	46718785	34403	-	intron:158791	ENSMUST00000107749.3	242425	Gabbr2	mm10_genes_introns	chr4:46717232
chr4	151098185	151098185	1	*	-48.03202908785206	chr4	151088982	151131541	42560	-	intron:174046	ENSMUST00000169423.8	100072	Camta1	mm10_genes_introns	chr4:151098185
chr1	120604071	120604071	1	*	46.77818392103445	chr1	120603922	120606872	2951	+	intron:13427	ENSMUST00000079721.8	13798	En1	mm10_genes_introns	chr1:120604071
chr2	73437534	73437534	1	*	38.25901983225766	chr2	73436954	73437691	738	-	exon:100361	ENSMUST00000094681.10	215280	Wipf1	mm10_genes_exons	chr2:73437534
chr11	120796760	120796760	1	*	-47.62173274257767	chr11	120796404	120797403	1000	-	promoter:93295	ENSMUST00000106135.7	68730	Dus1l	mm10_genes_promoters	chr11:120796760
chrX	12046978	12046978	1	*	-64.07981430288872	chrX	12046856	12047113	258	-	exon:822322	ENSMUST00000065143.13	71458	Bcor	mm10_genes_exons	chrX:12046978
chr2	181580562	181580562	1	*	-56.60217466460913	chr2	181577241	181581240	4000	+	1to5kb:14052	ENSMUST00000136759.1	100271841	Uckl1os	mm10_genes_1to5kb	chr2:181580562
chr8	121114757	121114757	1	*	53.56395078628856	chr8	121111171	121115170	4000	+	1to5kb:66664	ENSMUST00000054691.7	14234	Foxc2	mm10_genes_1to5kb	chr8:121114757
chr7	18927041	18927041	1	*	41.452612005275974	chr7	18926165	18942215	16051	+	intron:260989	ENSMUST00000032571.9	384569	Nova2	mm10_genes_introns	chr7:18927041
chr2	31137402	31137402	1	*	57.721563288705134	chr2	31105358	31141778	36421	-	intron:77824	ENSMUST00000073879.11	14269	Fnbp1	mm10_genes_introns	chr2:31137402
chr10	127750363	127750363	1	*	-49.731359338876736	chr10	127747276	127751096	3821	-	exon:503475	ENSMUST00000079692.5	11536	Gpr182	mm10_genes_exons	chr10:127750363
chr5	136059918	136059918	1	*	-41.45482151678213	chr5	136059048	136060047	1000	+	promoter:37934	ENSMUST00000139549.1	69665	Upk3bl	mm10_genes_promoters	chr5:136059918
chr17	29319989	29319989	1	*	47.904353290930885	chr17	29319392	29322185	2794	+	intron:600985	ENSMUST00000234782.1	74116	Pi16	mm10_genes_introns	chr17:29319989
chr2	70702073	70702073	1	*	72.60910855298644	chr2	70688473	70711039	22567	+	intron:54753	ENSMUST00000133432.7	70231	Gorasp2	mm10_genes_introns	chr2:70702073
chr5	74348869	74348869	1	*	-49.18186587669452	chr5	74236585	74397653	161069	-	intron:207629	ENSMUST00000072857.12	212986	Scfd2	mm10_genes_introns	chr5:74348869
chr1	65015880	65015880	1	*	55.431936387763294	chr1	65014760	65016066	1307	-	intron:27972	ENSMUST00000162800.7	70861	Akr1cl	mm10_genes_introns	chr1:65015880
chr15	84286509	84286509	1	*	-56.24810455600331	chr15	84282865	84290386	7522	+	intron:552227	ENSMUST00000023072.6	170736	Parvb	mm10_genes_introns	chr15:84286509
chr15	27514526	27514526	1	*	-53.06649409194589	chr15	27467100	27544250	77151	+	intron:545675	ENSMUST00000022875.6	11732	Ank	mm10_genes_introns	chr15:27514526
chr8	110678893	110678893	1	*	-51.629097127957955	chr8	110671183	110682491	11309	+	intron:328616	ENSMUST00000213003.1	234729	Vac14	mm10_genes_introns	chr8:110678893
chr4	125536030	125536030	1	*	58.082181786737365	chr4	125490946	125623480	132535	+	intron:147367	ENSMUST00000030676.7	14807	Grik3	mm10_genes_introns	chr4:125536030
chr5	21653477	21653477	1	*	-54.32969979634302	chr5	21653376	21653552	177	+	exon:212211	ENSMUST00000148873.7	67211	Armc10	mm10_genes_exons	chr5:21653477
chr10	116728383	116728383	1	*	-49.371461287856896	chr10	116728253	116729252	1000	+	promoter:80975	ENSMUST00000218193.1	75878	4930579P08Rik	mm10_genes_promoters	chr10:116728383
chr18	61335760	61335760	1	*	-55.57136148990194	chr18	61323309	61400289	76981	-	intron:645030	ENSMUST00000075299.12	170826	Ppargc1b	mm10_genes_introns	chr18:61335760
chr9	104339206	104339206	1	*	-56.37754730640222	chr9	104338729	104342728	4000	-	1to5kb:77124	ENSMUST00000062723.13	56318	Acpp	mm10_genes_1to5kb	chr9:104339206
chr4	154248245	154248245	1	*	60.49370000035586	chr4	154244296	154248295	4000	+	1to5kb:30086	ENSMUST00000183595.1	230971	Megf6	mm10_genes_1to5kb	chr4:154248245
chr8	105376536	105376536	1	*	40.57220233554545	chr8	105375494	105379493	4000	+	1to5kb:66215	ENSMUST00000161672.1	102075	Plekhg4	mm10_genes_1to5kb	chr8:105376536
chr4	150326025	150326025	1	*	-48.78023551659987	chr4	150282076	150406195	124120	+	intron:153160	ENSMUST00000105682.8	68703	Rere	mm10_genes_introns	chr4:150326025
chr10	115215175	115215175	1	*	49.04742820820642	chr10	115212808	115217561	4754	-	intron:416991	ENSMUST00000020339.9	66687	Tbc1d15	mm10_genes_introns	chr10:115215175
chr11	37197488	37197488	1	*	43.91659338439264	chr11	37145641	37235836	90196	-	intron:448581	ENSMUST00000102801.7	23964	Tenm2	mm10_genes_introns	chr11:37197488
chr11	33992764	33992764	1	*	47.610927036414175	chr11	33992749	33992988	240	-	exon:537966	ENSMUST00000238903.1	70357	Kcnip1	mm10_genes_exons	chr11:33992764
chr14	67414296	67414296	1	*	-50.31997760323513	chr14	67411990	67414362	2373	+	intron:526822	ENSMUST00000022637.13	13592	Ebf2	mm10_genes_introns	chr14:67414296
chrX	57054311	57054311	1	*	-72.01088086061841	chrX	57053898	57056092	2195	+	exon:810864	ENSMUST00000134785.1	72459	Htatsf1	mm10_genes_exons	chrX:57054311
chr9	29348530	29348530	1	*	-57.81772911141152	chr9	29179255	29411555	232301	-	intron:370193	ENSMUST00000075069.10	235106	Ntm	mm10_genes_introns	chr9:29348530
chr9	42619615	42619615	1	*	-55.44701354760857	chr9	42597962	42622058	24097	-	intron:371788	ENSMUST00000114865.7	110637	Grik4	mm10_genes_introns	chr9:42619615
chr13	29957267	29957267	1	*	64.09091714614932	chr13	29920226	29984127	63902	-	intron:505604	ENSMUST00000221536.1	13557	E2f3	mm10_genes_introns	chr13:29957267
chr10	78463457	78463457	1	*	-53.36257271549576	chr10	78453529	78464760	11232	-	intron:412149	ENSMUST00000041616.14	216134	Pdxk	mm10_genes_introns	chr10:78463457
chr18	68211866	68211866	1	*	49.379421999850734	chr18	68106692	68235654	128963	+	intron:638081	ENSMUST00000063775.4	52662	Ldlrad4	mm10_genes_introns	chr18:68211866
chr2	90478411	90478411	1	*	39.654077814896795	chr2	90474990	90478966	3977	-	intron:88175	ENSMUST00000111495.8	19271	Ptprj	mm10_genes_introns	chr2:90478411
chr2	112241630	112241630	1	*	-47.96870161719312	chr2	112240972	112241971	1000	+	promoter:11732	ENSMUST00000132314.1	99010	Lpcat4	mm10_genes_promoters	chr2:112241630
chr12	102207374	102207374	1	*	50.9554406938673	chr12	102131622	102213861	82240	+	intron:479696	ENSMUST00000159329.7	238384	Slc24a4	mm10_genes_introns	chr12:102207374
chr17	28858686	28858686	1	*	-55.10873849394521	chr17	28858411	28858866	456	+	5UTR:81358	ENSMUST00000056866.7	433091	Pnpla1	mm10_genes_5UTRs	chr17:28858686
chr19	5498396	5498396	1	*	-51.09820416299098	chr19	5498307	5499306	1000	-	promoter:133132	ENSMUST00000237249.1	225861	Snx32	mm10_genes_promoters	chr19:5498396
chrX	159988577	159988577	1	*	55.89767447262697	chrX	159988433	159988805	373	+	exon:819780	ENSMUST00000033665.8	270672	Map3k15	mm10_genes_exons	chrX:159988577
chr7	101677298	101677298	1	*	53.90595721788494	chr7	101677116	101681115	4000	+	1to5kb:54876	ENSMUST00000147439.7	20480	Clpb	mm10_genes_1to5kb	chr7:101677298
chr12	37396234	37396234	1	*	46.15823899482868	chr12	37357728	37398689	40962	+	intron:472765	ENSMUST00000049874.13	319660	Agmo	mm10_genes_introns	chr12:37396234
chr12	8543474	8543474	1	*	-49.89800988456627	chr12	8540546	8544545	4000	-	1to5kb:96260	ENSMUST00000095863.9	328059	Slc7a15	mm10_genes_1to5kb	chr12:8543474
chr2	65208891	65208891	1	*	57.131387803403	chr2	65151168	65238362	87195	-	intron:82934	ENSMUST00000112429.8	319876	Cobll1	mm10_genes_introns	chr2:65208891
chr7	44853968	44853968	1	*	43.76274797392303	chr7	44852139	44856138	4000	+	1to5kb:53254	ENSMUST00000107876.7	59047	Pnkp	mm10_genes_1to5kb	chr7:44853968
chr12	76537869	76537869	1	*	-53.173801653794115	chr12	76534213	76538212	4000	-	1to5kb:97338	ENSMUST00000174997.1	100628604	Mir5135	mm10_genes_1to5kb	chr12:76537869
chr12	30058554	30058554	1	*	-54.6083270030302	chr12	30055164	30074093	18930	-	intron:485012	ENSMUST00000021005.14	22018	Tpo	mm10_genes_introns	chr12:30058554
chr11	116685120	116685120	1	*	-48.36444855664773	chr11	116684817	116685816	1000	-	promoter:92998	ENSMUST00000123236.1	20446	St6galnac2	mm10_genes_promoters	chr11:116685120
chr11	96827381	96827381	1	*	45.54726622751596	chr11	96825014	96829013	4000	-	1to5kb:91790	ENSMUST00000167110.7	18023	Nfe2l1	mm10_genes_1to5kb	chr11:96827381
chr10	61221909	61221909	1	*	37.50544448397438	chr10	61221858	61222006	149	-	exon:491785	ENSMUST00000092486.10	237360	Adamts14	mm10_genes_exons	chr10:61221909
chr10	120052781	120052781	1	*	41.931786725371154	chr10	120050117	120054832	4716	+	intron:401406	ENSMUST00000077871.13	74053	Grip1	mm10_genes_introns	chr10:120052781
chr17	44500400	44500400	1	*	-41.28094257609239	chr17	44497244	44638512	141269	-	intron:624086	ENSMUST00000162816.7	12393	Runx2	mm10_genes_introns	chr17:44500400
chr9	110817678	110817678	1	*	-44.39866065651448	chr9	110817089	110817999	911	+	exon:437686	ENSMUST00000098345.2	73336	Prss44	mm10_genes_exons	chr9:110817678
chr1	97761795	97761795	1	*	-68.52472237961516	chr1	97761539	97762538	1000	-	promoter:6310	ENSMUST00000171129.7	227399	Ppip5k2	mm10_genes_promoters	chr1:97761795
chr1	181167899	181167899	1	*	-62.16755777212752	chr1	181166181	181168994	2814	+	exon:24491	ENSMUST00000111059.1	98417	Cnih4	mm10_genes_exons	chr1:181167899
chr10	90804178	90804178	1	*	41.72335282141878	chr10	90680920	90895098	214179	+	intron:399070	ENSMUST00000183156.7	77531	Anks1b	mm10_genes_introns	chr10:90804178
chr4	45900126	45900126	1	*	50.10301413700697	chr4	45899957	45900272	316	+	exon:166079	ENSMUST00000127261.1	381522	Ccdc180	mm10_genes_exons	chr4:45900126
chr8	70331306	70331306	1	*	-53.89281574353886	chr8	70330699	70331592	894	+	exon:385634	ENSMUST00000165819.8	14559	Gdf1	mm10_genes_exons	chr8:70331306
chr10	60618471	60618471	1	*	-66.08382651895583	chr10	60597759	60650089	52331	-	intron:408629	ENSMUST00000073242.10	22295	Cdh23	mm10_genes_introns	chr10:60618471
chr3	51751517	51751517	1	*	48.67249286340487	chr3	51697844	51796398	98555	-	intron:122490	ENSMUST00000118075.6	433586	Maml3	mm10_genes_introns	chr3:51751517
chr2	43665805	43665805	1	*	-50.641339984858845	chr2	43631620	43671358	39739	+	intron:52541	ENSMUST00000028223.8	70789	Kynu	mm10_genes_introns	chr2:43665805
chr15	85211053	85211053	1	*	-51.41652280602089	chr15	85206213	85221903	15691	+	intron:552406	ENSMUST00000057410.13	14114	Fbln1	mm10_genes_introns	chr15:85211053
chr9	114415316	114415316	1	*	55.157460986258286	chr9	114401270	114416960	15691	+	intron:364812	ENSMUST00000063042.10	12091	Glb1	mm10_genes_introns	chr9:114415316
chr5	44676433	44676433	1	*	-70.34111758859348	chr5	44669460	44799361	129902	-	intron:205313	ENSMUST00000199534.4	16826	Ldb2	mm10_genes_introns	chr5:44676433
chr9	56324917	56324917	1	*	70.7980070854829	chr9	56318821	56374375	55555	-	intron:375044	ENSMUST00000061552.14	244895	Peak1	mm10_genes_introns	chr9:56324917
chr9	56324942	56324942	1	*	70.7980070854829	chr9	56318821	56374375	55555	-	intron:375044	ENSMUST00000061552.14	244895	Peak1	mm10_genes_introns	chr9:56324942
chr8	70344884	70344884	1	*	47.65604569924977	chr8	70344366	70352777	8412	-	intron:337708	ENSMUST00000215817.1	19704	Upf1	mm10_genes_introns	chr8:70344884
chr15	78613291	78613291	1	*	-50.08360737313322	chr15	78611598	78615716	4119	+	intron:550120	ENSMUST00000043069.5	72318	Cyth4	mm10_genes_introns	chr15:78613291
chr7	110309926	110309926	1	*	-52.525068337907534	chr7	110309497	110310157	661	-	intron:305222	ENSMUST00000164759.7	319934	Sbf2	mm10_genes_introns	chr7:110309926
chr15	37234869	37234869	1	*	-54.354773019620374	chr15	37233407	37270589	37183	+	intron:546426	ENSMUST00000161405.7	252973	Grhl2	mm10_genes_introns	chr15:37234869
chr14	117891755	117891755	1	*	-54.37385243864632	chr14	117888666	117951137	62472	+	intron:528762	ENSMUST00000088483.9	23888	Gpc6	mm10_genes_introns	chr14:117891755
chr16	55278317	55278317	1	*	-46.50726964994021	chr16	55267308	55282881	15574	-	intron:590539	ENSMUST00000036412.3	239852	Zpld1	mm10_genes_introns	chr16:55278317
chr5	121908911	121908911	1	*	-44.807100903168305	chr5	121898356	121921313	22958	-	intron:214776	ENSMUST00000111752.9	13048	Cux2	mm10_genes_introns	chr5:121908911
chr3	103137356	103137356	1	*	42.58787929381089	chr3	103135326	103139325	4000	+	1to5kb:21803	ENSMUST00000174060.7	329727	Dennd2c	mm10_genes_1to5kb	chr3:103137356
chr8	26815271	26815271	1	*	42.31396832952109	chr8	26815163	26815305	143	-	exon:402079	ENSMUST00000189978.1	72316	2310008N11Rik	mm10_genes_exons	chr8:26815271
chr16	43969311	43969311	1	*	60.84801264932089	chr16	43965033	43969413	4381	-	exon:708676	ENSMUST00000231700.1	332175	Zdhhc23	mm10_genes_exons	chr16:43969311
chr5	111227590	111227590	1	*	-55.360788784438064	chr5	111226082	111229347	3266	+	intron:189858	ENSMUST00000040111.9	209683	Ttc28	mm10_genes_introns	chr5:111227590
chr5	140073732	140073732	1	*	41.63631039142834	chr5	140066005	140088629	22625	-	intron:221038	ENSMUST00000110829.6	17120	Mad1l1	mm10_genes_introns	chr5:140073732
chr14	101898371	101898371	1	*	45.23233640988767	chr14	101896585	101898556	1972	+	intron:528377	ENSMUST00000100337.9	380928	Lmo7	mm10_genes_introns	chr14:101898371
chr10	81346670	81346670	1	*	52.2282698248527	chr10	81344267	81348266	4000	-	1to5kb:83357	ENSMUST00000045102.6	209047	Gipc3	mm10_genes_1to5kb	chr10:81346670
chr7	105480966	105480966	1	*	56.245236808981126	chr7	105480083	105481219	1137	-	exon:365870	ENSMUST00000047040.3	109042	Cavin3	mm10_genes_exons	chr7:105480966
chr11	48809153	48809153	1	*	53.00354902715243	chr11	48809050	48809280	231	-	exon:538995	ENSMUST00000047145.13	211007	Trim41	mm10_genes_exons	chr11:48809153
chr6	70892797	70892797	1	*	47.20304860412785	chr6	70891764	70895763	4000	+	1to5kb:44901	ENSMUST00000161316.1	13666	Eif2ak3	mm10_genes_1to5kb	chr6:70892797
chr1	119966351	119966351	1	*	51.91827180403625	chr1	119961976	119981713	19738	-	intron:33557	ENSMUST00000174370.7	226356	Cfap221	mm10_genes_introns	chr1:119966351
chr14	25749780	25749780	1	*	60.3594188392518	chr14	25719792	25757010	37219	-	intron:532176	ENSMUST00000069180.7	71918	Zcchc24	mm10_genes_introns	chr14:25749780
chr6	89357025	89357025	1	*	-54.11638178959972	chr6	89356458	89357718	1261	-	exon:298396	ENSMUST00000163139.7	18844	Plxna1	mm10_genes_exons	chr6:89357025
chr11	86358693	86358693	1	*	55.249697376319176	chr11	86358603	86362602	4000	-	1to5kb:91486	ENSMUST00000043624.8	327987	Med13	mm10_genes_1to5kb	chr11:86358693
chr10	8785802	8785802	1	*	-56.81796609718936	chr10	8784311	8786347	2037	-	intron:404497	ENSMUST00000015449.5	70097	Sash1	mm10_genes_introns	chr10:8785802
chr4	59352136	59352136	1	*	54.400186087893474	chr4	59351730	59365721	13992	-	intron:159719	ENSMUST00000040166.13	634731	Susd1	mm10_genes_introns	chr4:59352136
chr17	86802048	86802048	1	*	47.071639206478494	chr17	86797307	86805192	7886	+	intron:612412	ENSMUST00000024954.10	13819	Epas1	mm10_genes_introns	chr17:86802048
chr2	57111486	57111486	1	*	47.47646658039345	chr2	57110767	57111575	809	-	intron:81994	ENSMUST00000028166.8	18227	Nr4a2	mm10_genes_introns	chr2:57111486
chr10	80312052	80312052	1	*	50.98350867172009	chr10	80311033	80318263	7231	+	exon:476749	ENSMUST00000105359.7	23805	Apc2	mm10_genes_exons	chr10:80312052
chr11	57829775	57829775	1	*	-49.99109892461446	chr11	57829707	57831243	1537	-	intron:450429	ENSMUST00000160392.8	15110	Hand1	mm10_genes_introns	chr11:57829775
chr11	79098076	79098076	1	*	-53.11370816272015	chr11	79074487	79146054	71568	-	intron:457070	ENSMUST00000018478.10	16706	Ksr1	mm10_genes_introns	chr11:79098076
chr6	125063365	125063365	1	*	49.0765138995894	chr6	125062920	125066919	4000	+	1to5kb:46537	ENSMUST00000088292.6	381810	Lpar5	mm10_genes_1to5kb	chr6:125063365
chr4	130579022	130579022	1	*	51.7679229953264	chr4	130575174	130579173	4000	-	1to5kb:32927	ENSMUST00000105993.3	67149	Nkain1	mm10_genes_1to5kb	chr4:130579022
chr3	116670735	116670735	1	*	45.65450459981407	chr3	116669470	116673718	4249	-	exon:156873	ENSMUST00000029569.8	229782	Slc35a3	mm10_genes_exons	chr3:116670735
chr7	30909908	30909908	1	*	-47.88182502999303	chr7	30909273	30911400	2128	-	intron:293358	ENSMUST00000187137.6	17136	Mag	mm10_genes_introns	chr7:30909908
chr15	97053753	97053753	1	*	46.95940831221937	chr15	97051088	97055087	4000	-	1to5kb:114875	ENSMUST00000230907.1	69354	Slc38a4	mm10_genes_1to5kb	chr15:97053753
chr5	125026703	125026703	1	*	-72.78434375007501	chr5	125026088	125027087	1000	-	promoter:42006	ENSMUST00000130742.1	20602	Ncor2	mm10_genes_promoters	chr5:125026703
chr2	165797922	165797922	1	*	66.34094132683475	chr2	165796162	165797933	1772	-	intron:100614	ENSMUST00000109266.10	228880	Zmynd8	mm10_genes_introns	chr2:165797922
chr6	138388642	138388642	1	*	58.702040767640995	chr6	138377326	138416414	39089	-	intron:256715	ENSMUST00000162772.7	109593	Lmo3	mm10_genes_introns	chr6:138388642
chr4	141955844	141955844	1	*	-50.72262339875224	chr4	141953077	141957076	4000	-	1to5kb:33509	ENSMUST00000129192.7	329977	Fhad1	mm10_genes_1to5kb	chr4:141955844
chr13	45556082	45556082	1	*	50.24258408331824	chr13	45549755	45557585	7831	-	exon:609441	ENSMUST00000091628.10	20238	Atxn1	mm10_genes_exons	chr13:45556082
chr11	22800610	22800610	1	*	-47.468779384876164	chr11	22800445	22859493	59049	-	intron:447249	ENSMUST00000189990.1	53625	B3gnt2	mm10_genes_introns	chr11:22800610
chr18	77258200	77258200	1	*	-51.459532780932804	chr18	77254366	77258771	4406	+	exon:768131	ENSMUST00000075290.7	225742	St8sia5	mm10_genes_exons	chr18:77258200
chr2	102022073	102022073	1	*	44.066292884778946	chr2	101955175	102057906	102732	-	intron:90170	ENSMUST00000111222.1	241576	Ldlrad3	mm10_genes_introns	chr2:102022073
chr8	121753340	121753340	1	*	53.802279671261175	chr8	121752476	121753475	1000	+	promoter:66682	ENSMUST00000172209.1	57340	Jph3	mm10_genes_promoters	chr8:121753340
chr1	168215283	168215283	1	*	44.61901432185358	chr1	168209596	168427868	218273	-	intron:40454	ENSMUST00000188912.6	18514	Pbx1	mm10_genes_introns	chr1:168215283
chr8	70331320	70331320	1	*	-63.054861173174736	chr8	70330699	70331592	894	+	exon:385634	ENSMUST00000165819.8	14559	Gdf1	mm10_genes_exons	chr8:70331320
chr13	55005063	55005063	1	*	-67.39838800127075	chr13	55004806	55006018	1213	+	exon:597688	ENSMUST00000026994.13	107448	Unc5a	mm10_genes_exons	chr13:55005063
chr12	85221760	85221760	1	*	-62.66994280608809	chr12	85219526	85223525	4000	+	1to5kb:95064	ENSMUST00000130760.1	217715	Eif2b2	mm10_genes_1to5kb	chr12:85221760
chr8	108068456	108068456	1	*	-48.3678864370345	chr8	107942701	108133416	190716	+	intron:328088	ENSMUST00000220518.1	11906	Zfhx3	mm10_genes_introns	chr8:108068456
chr9	106680957	106680957	1	*	-40.0122474841501	chr9	106673739	106681867	8129	-	intron:382577	ENSMUST00000169068.7	21767	Tex264	mm10_genes_introns	chr9:106680957
chr9	60627002	60627002	1	*	53.703031287522364	chr9	60621717	60649479	27763	-	intron:376020	ENSMUST00000150060.7	102747	Lrrc49	mm10_genes_introns	chr9:60627002
chr5	113214545	113214545	1	*	-38.097899886567745	chr5	113193908	113221210	27303	-	intron:212937	ENSMUST00000211733.1	243219	2900026A02Rik	mm10_genes_introns	chr5:113214545
chr1	38358439	38358439	1	*	-46.58959170554301	chr1	38341802	38406495	64694	-	intron:25169	ENSMUST00000095027.8	16764	Aff3	mm10_genes_introns	chr1:38358439
chr11	50886381	50886381	1	*	-58.51172541045906	chr11	50886369	50886498	130	-	5UTR:61352	ENSMUST00000109131.7	237758	Zfp454	mm10_genes_5UTRs	chr11:50886381
chrX	73922485	73922485	1	*	43.974724569245936	chrX	73921871	73922870	1000	-	promoter:138580	ENSMUST00000128329.1	171207	Arhgap4	mm10_genes_promoters	chrX:73922485
chr14	34589931	34589931	1	*	49.17451663984265	chr14	34589665	34593664	4000	-	1to5kb:108258	ENSMUST00000022327.12	24131	Ldb3	mm10_genes_1to5kb	chr14:34589931
chr7	65142182	65142182	1	*	-54.604678169740865	chr7	64983438	65156104	172667	-	intron:298731	ENSMUST00000119118.7	70638	Fam189a1	mm10_genes_introns	chr7:65142182
chr13	113613073	113613073	1	*	-48.68282418122523	chr13	113613051	113613641	591	-	exon:620184	ENSMUST00000223993.1	170625	Snx18	mm10_genes_exons	chr13:113613073
chr4	106610234	106610234	1	*	-49.93782377011124	chr4	106608396	106612395	4000	-	1to5kb:31957	ENSMUST00000126324.6	242602	Lexm	mm10_genes_1to5kb	chr4:106610234
chr1	157458527	157458527	1	*	-48.0285854745624	chr1	157457577	157458576	1000	+	promoter:3144	ENSMUST00000193791.5	226527	Cryzl2	mm10_genes_promoters	chr1:157458527
chr13	28671744	28671744	1	*	50.90558709173392	chr13	28669995	28772618	102624	-	intron:505489	ENSMUST00000148885.7	72518	2610307P16Rik	mm10_genes_introns	chr13:28671744
chr16	33229523	33229523	1	*	47.83119837093815	chr16	33229149	33234422	5274	+	intron:577940	ENSMUST00000232100.1	106326	Osbpl11	mm10_genes_introns	chr16:33229523
chr1	133375553	133375553	1	*	-50.55606438031589	chr1	133374611	133376905	2295	+	intron:14612	ENSMUST00000135222.8	214253	Etnk2	mm10_genes_introns	chr1:133375553
chr17	46728962	46728962	1	*	46.2667089435149	chr17	46727802	46731801	4000	-	1to5kb:126012	ENSMUST00000147112.1	14711	Gnmt	mm10_genes_1to5kb	chr17:46728962
chr2	6389712	6389712	1	*	55.66435703997145	chr2	6336460	6391054	54595	+	intron:44711	ENSMUST00000114937.7	98910	Usp6nl	mm10_genes_introns	chr2:6389712
chr19	7372539	7372539	1	*	48.213130138394384	chr19	7354256	7373656	19401	-	intron:662319	ENSMUST00000237653.1	68229	Spindoc	mm10_genes_introns	chr19:7372539
chrX	104482802	104482802	1	*	-44.41444902097162	chrX	104481818	104482817	1000	+	promoter:136549	ENSMUST00000087867.5	331487	Uprt	mm10_genes_promoters	chrX:104482802
chr7	4994408	4994408	1	*	59.32156197901819	chr7	4992854	4994912	2059	-	exon:343750	ENSMUST00000108572.1	68490	Zfp579	mm10_genes_exons	chr7:4994408
chr10	67180545	67180545	1	*	-46.038982193838024	chr10	67158072	67189735	31664	+	intron:392543	ENSMUST00000174062.7	108829	Jmjd1c	mm10_genes_introns	chr10:67180545
chr4	133186090	133186090	1	*	-60.78869634322274	chr4	133184018	133188017	4000	+	1to5kb:29243	ENSMUST00000136637.1	242687	Wasf2	mm10_genes_1to5kb	chr4:133186090
chr1	93142324	93142324	1	*	-52.17323191802225	chr1	93142138	93144054	1917	+	intron:11465	ENSMUST00000027491.6	11611	Agxt	mm10_genes_introns	chr1:93142324
chr7	17710473	17710473	1	*	-51.31334126221332	chr7	17708238	17712237	4000	+	1to5kb:51714	ENSMUST00000081907.7	73250	Ceacam5	mm10_genes_1to5kb	chr7:17710473
chr6	42694206	42694206	1	*	-49.046915566896466	chr6	42694088	42698087	4000	-	1to5kb:47989	ENSMUST00000121083.7	77574	Tcaf1	mm10_genes_1to5kb	chr6:42694206
chr2	117838886	117838886	1	*	-50.02001352262748	chr2	117824859	117877826	52968	+	intron:59746	ENSMUST00000149239.1	73938	4930412B13Rik	mm10_genes_introns	chr2:117838886
chr8	85171610	85171610	1	*	-52.69677428946357	chr8	85171324	85173622	2299	+	exon:389752	ENSMUST00000211617.1	624855	Cks1brt	mm10_genes_exons	chr8:85171610
chr4	128934366	128934366	1	*	49.978114850459384	chr4	128930951	128934456	3506	-	intron:168339	ENSMUST00000119354.7	242669	Azin2	mm10_genes_introns	chr4:128934366
chr5	144780732	144780732	1	*	-52.96647927508301	chr5	144780525	144784524	4000	+	1to5kb:38391	ENSMUST00000132925.1	100683	Trrap	mm10_genes_1to5kb	chr5:144780732
chr7	136924664	136924664	1	*	49.479689603017704	chr7	136894688	136951267	56580	+	intron:282491	ENSMUST00000081510.3	17314	Mgmt	mm10_genes_introns	chr7:136924664
chr14	33970122	33970122	1	*	-52.11320540224922	chr14	33967070	33971315	4246	-	exon:642717	ENSMUST00000166737.1	382867	Zfp488	mm10_genes_exons	chr14:33970122
chr19	58652120	58652120	1	*	-55.32128509595737	chr19	58651498	58652497	1000	+	promoter:132703	ENSMUST00000237451.1	69060	Pnlip	mm10_genes_promoters	chr19:58652120
chr9	102528226	102528226	1	*	-57.5044559763217	chr9	102528018	102537600	9583	+	intron:359813	ENSMUST00000039390.5	16716	Ky	mm10_genes_introns	chr9:102528226
chr1	155422142	155422142	1	*	-50.49216823275935	chr1	155418330	155422329	4000	-	1to5kb:7297	ENSMUST00000027741.11	19775	Xpr1	mm10_genes_1to5kb	chr1:155422142
chr4	139593724	139593724	1	*	-56.723446230102525	chr4	139536633	139603212	66580	+	intron:151742	ENSMUST00000123827.8	212632	Iffo2	mm10_genes_introns	chr4:139593724
chr15	78613540	78613540	1	*	-49.65136401430218	chr15	78611598	78615716	4119	+	intron:550120	ENSMUST00000043069.5	72318	Cyth4	mm10_genes_introns	chr15:78613540
chr17	57022473	57022473	1	*	44.59417063520381	chr17	57021051	57022970	1920	-	exon:753203	ENSMUST00000007814.9	16549	Khsrp	mm10_genes_exons	chr17:57022473
chr17	24647802	24647802	1	*	-48.443223431834284	chr17	24645991	24649990	4000	-	1to5kb:124156	ENSMUST00000019684.12	65962	Slc9a3r2	mm10_genes_1to5kb	chr17:24647802
chr7	80605135	80605135	1	*	-50.838095778583714	chr7	80604401	80605747	1347	-	intron:300545	ENSMUST00000122255.7	70461	Crtc3	mm10_genes_introns	chr7:80605135
chr2	29891426	29891426	1	*	50.65149606479683	chr2	29890996	29891995	1000	+	promoter:9597	ENSMUST00000130899.1	18286	Odf2	mm10_genes_promoters	chr2:29891426
chrX	93297142	93297142	1	*	48.53206189750922	chrX	93294939	93297162	2224	+	intron:677354	ENSMUST00000046565.12	11878	Arx	mm10_genes_introns	chrX:93297142
chr6	145012966	145012966	1	*	-61.38006776151641	chr6	145010136	145015448	5313	-	intron:257675	ENSMUST00000032402.11	12035	Bcat1	mm10_genes_introns	chr6:145012966
chr14	56402856	56402856	1	*	-54.81711328652415	chr14	56402825	56405576	2752	+	intron:525655	ENSMUST00000095793.2	30054	Rnf17	mm10_genes_introns	chr14:56402856
chr8	88219936	88219936	1	*	49.58040984833452	chr8	88200503	88243240	42738	+	intron:324413	ENSMUST00000066748.9	214627	Tent4b	mm10_genes_introns	chr8:88219936
chr1	46819173	46819173	1	*	-53.25058975305972	chr1	46819065	46819433	369	-	exon:30861	ENSMUST00000027131.5	227059	Slc39a10	mm10_genes_exons	chr1:46819173
chr11	100437059	100437059	1	*	58.61117941295602	chr11	100436917	100440916	4000	+	1to5kb:87868	ENSMUST00000001599.3	66720	Klhl10	mm10_genes_1to5kb	chr11:100437059
chr5	112370156	112370156	1	*	-50.59960049822658	chr5	112369946	112370744	799	+	exon:226924	ENSMUST00000112359.8	192232	Hps4	mm10_genes_exons	chr5:112370156
chr4	32738429	32738429	1	*	-48.28476062408902	chr4	32735896	32738608	2713	+	intron:136770	ENSMUST00000071642.10	100019	Mdn1	mm10_genes_introns	chr4:32738429
chr8	120554887	120554887	1	*	-55.26032949767201	chr8	120553803	120562625	8823	+	intron:329784	ENSMUST00000034279.15	382034	Gse1	mm10_genes_introns	chr8:120554887
chr5	114909261	114909261	1	*	57.95707339740379	chr5	114906805	114910890	4086	+	intron:190761	ENSMUST00000031542.12	23962	Oasl2	mm10_genes_introns	chr5:114909261
chr18	36284670	36284670	1	*	49.332419864173296	chr18	36281550	36287031	5482	+	intron:633863	ENSMUST00000051301.5	19290	Pura	mm10_genes_introns	chr18:36284670
chr6	90604264	90604264	1	*	-48.87252275006796	chr6	90603725	90604724	1000	+	promoter:45640	ENSMUST00000044019.15	71699	Slc41a3	mm10_genes_promoters	chr6:90604264
chr16	35948156	35948156	1	*	58.71623555990526	chr16	35947284	35948283	1000	+	promoter:116671	ENSMUST00000159160.1	80285	Parp9	mm10_genes_promoters	chr16:35948156
chr14	10791580	10791580	1	*	-56.4519446583885	chr14	10729796	11125546	395751	-	intron:529760	ENSMUST00000162278.7	14198	Fhit	mm10_genes_introns	chr14:10791580
chr12	108309577	108309577	1	*	-47.26038947975441	chr12	108306684	108311687	5004	+	intron:480692	ENSMUST00000021685.7	214305	Hhipl1	mm10_genes_introns	chr12:108309577
chr3	28397308	28397308	1	*	-49.69872204062136	chr3	28359057	28493966	134910	+	intron:104152	ENSMUST00000160934.7	665113	Tnik	mm10_genes_introns	chr3:28397308
chr8	118356303	118356303	1	*	-52.03053342432674	chr8	118283899	118505603	221705	+	intron:329412	ENSMUST00000117160.1	12554	Cdh13	mm10_genes_introns	chr8:118356303
chr7	49262955	49262955	1	*	63.680572139634364	chr7	48964441	49362097	397657	+	intron:268489	ENSMUST00000183659.7	78286	Nav2	mm10_genes_introns	chr7:49262955
chr9	103521956	103521956	1	*	-55.03049838973912	chr9	103500209	103609710	109502	-	intron:381160	ENSMUST00000049452.14	81907	Tmem108	mm10_genes_introns	chr9:103521956
chr16	6227881	6227881	1	*	55.26050305899351	chr16	6173668	6487818	314151	+	intron:571660	ENSMUST00000230658.1	268859	Rbfox1	mm10_genes_introns	chr16:6227881
chrX	72918273	72918273	1	*	48.332635519207564	chrX	72917557	72918556	1000	+	promoter:135924	ENSMUST00000033715.4	18194	Nsdhl	mm10_genes_promoters	chrX:72918273
chr5	128260074	128260074	1	*	-54.07538706536384	chr5	128137030	128268491	131462	-	intron:217096	ENSMUST00000044441.7	243274	Tmem132d	mm10_genes_introns	chr5:128260074
chr7	79112497	79112497	1	*	43.82300023094078	chr7	79112038	79112673	636	+	intron:271163	ENSMUST00000032835.6	11595	Acan	mm10_genes_introns	chr7:79112497
chr14	30880931	30880931	1	*	51.38031804080334	chr14	30880924	30881610	687	+	exon:625253	ENSMUST00000040715.7	66175	Mustn1	mm10_genes_exons	chr14:30880931
chr2	169642042	169642042	1	*	-53.43281723003488	chr2	169633780	169883525	249746	+	intron:70146	ENSMUST00000109159.2	228911	Tshz2	mm10_genes_introns	chr2:169642042
chr9	41335172	41335172	1	*	-65.0759915527582	chr9	41327376	41393193	65818	+	intron:350144	ENSMUST00000233562.1	73144	Mir100hg	mm10_genes_introns	chr9:41335172
chr11	97113681	97113681	1	*	48.21510748557824	chr11	97102099	97114649	12551	-	intron:460153	ENSMUST00000001484.2	57765	Tbx21	mm10_genes_introns	chr11:97113681
chr5	92809159	92809159	1	*	-63.30019162227043	chr5	92808378	92809377	1000	+	promoter:36282	ENSMUST00000113054.8	27428	Shroom3	mm10_genes_promoters	chr5:92809159
chr3	26982638	26982638	1	*	-54.6849813694841	chr3	26927390	26982919	55530	+	intron:103995	ENSMUST00000047005.10	70862	Spata16	mm10_genes_introns	chr3:26982638
chr8	11006340	11006340	1	*	50.476195529487754	chr8	11002850	11006849	4000	+	1to5kb:63760	ENSMUST00000180750.7	619321	9530052E02Rik	mm10_genes_1to5kb	chr8:11006340
chr7	51626940	51626940	1	*	51.247172790866266	chr7	51624480	51628479	4000	+	1to5kb:53637	ENSMUST00000208597.1	140919	Slc17a6	mm10_genes_1to5kb	chr7:51626940
chr16	38821248	38821248	1	*	44.5191619536353	chr16	38812468	38824492	12025	-	intron:589652	ENSMUST00000122078.2	74663	Tex55	mm10_genes_introns	chr16:38821248
chr4	109982682	109982682	1	*	-58.955713399502294	chr4	109981605	109983687	2083	+	exon:173120	ENSMUST00000061187.3	242620	Dmrta2	mm10_genes_exons	chr4:109982682
chr11	80047087	80047087	1	*	-45.76378646341554	chr11	80046493	80047737	1245	-	exon:548523	ENSMUST00000103233.9	54394	Crlf3	mm10_genes_exons	chr11:80047087
chr2	154676914	154676914	1	*	58.045423591098796	chr2	154651976	154689517	37542	+	intron:66757	ENSMUST00000151668.7	75608	Chmp4b	mm10_genes_introns	chr2:154676914
chr18	69380660	69380660	1	*	-49.072615314777124	chr18	69349145	69461861	112717	+	intron:638133	ENSMUST00000203002.3	21413	Tcf4	mm10_genes_introns	chr18:69380660
chr15	83808235	83808235	1	*	48.191500999949454	chr15	83780108	83836272	56165	+	intron:552131	ENSMUST00000163723.7	223726	Mpped1	mm10_genes_introns	chr15:83808235
chr13	58218396	58218396	1	*	-57.256258577874	chr13	58216654	58220653	4000	-	1to5kb:102841	ENSMUST00000058735.11	56085	Ubqln1	mm10_genes_1to5kb	chr13:58218396
chr5	123562900	123562900	1	*	53.20443490495179	chr5	123560020	123564019	4000	-	1to5kb:41863	ENSMUST00000200325.1	77573	Vps33a	mm10_genes_1to5kb	chr5:123562900
chr3	153563324	153563324	1	*	49.475671380951056	chr3	153509498	153725044	215547	-	intron:134686	ENSMUST00000200397.4	20447	St6galnac3	mm10_genes_introns	chr3:153563324
chr5	115533583	115533583	1	*	-64.80395139991379	chr5	115506869	115544342	37474	+	intron:190981	ENSMUST00000067268.14	19303	Pxn	mm10_genes_introns	chr5:115533583
chr1	36388784	36388784	1	*	51.23501135465369	chr1	36388717	36388799	83	+	exon:2919	ENSMUST00000179162.6	100534273	Fer1l5	mm10_genes_exons	chr1:36388784
chr17	73342416	73342416	1	*	-47.969552748448045	chr17	73341150	73345138	3989	-	intron:628174	ENSMUST00000095208.3	381122	Capn13	mm10_genes_introns	chr17:73342416
chr1	164250649	164250649	1	*	-53.59912542469429	chr1	164249457	164256746	7290	+	intron:17858	ENSMUST00000044021.11	116914	Slc19a2	mm10_genes_introns	chr1:164250649
chrX	151379677	151379677	1	*	-54.7067629247885	chrX	151376995	151381910	4916	+	intron:681230	ENSMUST00000073364.5	207375	Fam120c	mm10_genes_introns	chrX:151379677
chr17	48519729	48519729	1	*	-56.26495972347202	chr17	48465030	48522678	57649	+	intron:608139	ENSMUST00000162313.7	76589	Unc5cl	mm10_genes_introns	chr17:48519729
chrX	12761803	12761803	1	*	55.96751673413925	chrX	12761700	12762073	374	-	5UTR:93309	ENSMUST00000096495.10	26896	Med14	mm10_genes_5UTRs	chrX:12761803
chr10	79930797	79930797	1	*	54.357755392919515	chr10	79930635	79930893	259	+	5UTR:54280	ENSMUST00000019708.11	13496	Arid3a	mm10_genes_5UTRs	chr10:79930797
chr12	69760813	69760813	1	*	44.77894894491621	chr12	69760171	69769399	9229	-	intron:487358	ENSMUST00000021377.4	71091	Cdkl1	mm10_genes_introns	chr12:69760813
chr10	62994107	62994107	1	*	51.94741780749526	chr10	62994042	62994704	663	+	intron:392262	ENSMUST00000131718.7	70432	Rufy2	mm10_genes_introns	chr10:62994107
chr10	61605622	61605622	1	*	61.345037528009705	chr10	61595499	61613955	18457	+	intron:392063	ENSMUST00000020287.7	237362	Npffr1	mm10_genes_introns	chr10:61605622
chr5	150152263	150152263	1	*	-62.92085715075331	chr5	150118812	150196562	77751	+	intron:199170	ENSMUST00000200960.3	320365	Fry	mm10_genes_introns	chr5:150152263
chr4	100397634	100397634	1	*	-49.980951709258676	chr4	100334517	100407812	73296	+	intron:142316	ENSMUST00000039630.5	26563	Ror1	mm10_genes_introns	chr4:100397634
chr4	138144306	138144306	1	*	57.14119034806059	chr4	138126635	138146284	19650	+	intron:150820	ENSMUST00000084215.11	230861	Eif4g3	mm10_genes_introns	chr4:138144306
chr14	21409829	21409829	1	*	-55.373294188590826	chr14	21381618	21423502	41885	+	intron:518600	ENSMUST00000045376.10	11534	Adk	mm10_genes_introns	chr14:21409829
chr3	95307824	95307824	1	*	-60.81790212247896	chr3	95307177	95308176	1000	-	promoter:24876	ENSMUST00000015846.8	71790	Anxa9	mm10_genes_promoters	chr3:95307824
chr11	115797382	115797382	1	*	-62.103078249344875	chr11	115797367	115797461	95	+	exon:529912	ENSMUST00000093912.10	71947	Tmem94	mm10_genes_exons	chr11:115797382
chr2	25395617	25395617	1	*	68.10963018547712	chr2	25394874	25395873	1000	+	promoter:9257	ENSMUST00000028328.2	12496	Entpd2	mm10_genes_promoters	chr2:25395617
chr9	3176488	3176488	1	*	-71.04725889551142	chr9	3135103	3190582	55480	-	intron:366860	ENSMUST00000048921.12	114673	4930433N12Rik	mm10_genes_introns	chr9:3176488
chr2	101792206	101792206	1	*	59.945019713780425	chr2	101772409	101797420	25012	-	intron:90135	ENSMUST00000171088.7	72446	Prr5l	mm10_genes_introns	chr2:101792206
chr17	31853242	31853242	1	*	53.35508843502519	chr17	31852576	31856575	4000	-	1to5kb:124949	ENSMUST00000234867.1	17691	Sik1	mm10_genes_1to5kb	chr17:31853242
chr15	78529023	78529023	1	*	-46.3219691387063	chr15	78527469	78529517	2049	-	intron:563887	ENSMUST00000023075.8	72709	C1qtnf6	mm10_genes_introns	chr15:78529023
chr17	47328844	47328844	1	*	-63.66021652692972	chr17	47327105	47329017	1913	+	intron:607704	ENSMUST00000188947.6	224829	Trerf1	mm10_genes_introns	chr17:47328844
chr4	151752278	151752278	1	*	49.41725808384172	chr4	151586483	151830417	243935	-	intron:174054	ENSMUST00000169423.8	100072	Camta1	mm10_genes_introns	chr4:151752278
chr9	110386234	110386234	1	*	69.49001833279918	chr9	110386157	110386244	88	-	intron:384714	ENSMUST00000040021.11	104831	Ptpn23	mm10_genes_introns	chr9:110386234
chr8	83583517	83583517	1	*	52.69450206710079	chr8	83574529	83594339	19811	-	intron:339489	ENSMUST00000163837.1	106529	Tecr	mm10_genes_introns	chr8:83583517
chr6	116651962	116651962	1	*	47.3805481847329	chr6	116648937	116652936	4000	-	1to5kb:49780	ENSMUST00000203634.1	213391	Rassf4	mm10_genes_1to5kb	chr6:116651962
chr12	111424768	111424768	1	*	-42.01651020671397	chr12	111423345	111427344	4000	+	1to5kb:95893	ENSMUST00000222262.1	74190	Exoc3l4	mm10_genes_1to5kb	chr12:111424768
chr1	153746325	153746325	1	*	47.500708290123356	chr1	153744426	153748425	4000	+	1to5kb:3067	ENSMUST00000086209.9	24014	Rnasel	mm10_genes_1to5kb	chr1:153746325
chr11	76464238	76464238	1	*	-40.92669073001801	chr11	76464238	76464290	53	-	exon:547559	ENSMUST00000094012.10	109934	Abr	mm10_genes_exons	chr11:76464238
chr6	52200333	52200333	1	*	35.71053902981276	chr6	52200124	52201123	1000	+	promoter:44401	ENSMUST00000131502.1	72628	Hoxaas3	mm10_genes_promoters	chr6:52200333
chr7	16885899	16885899	1	*	-44.815667093963114	chr7	16885081	16887462	2382	+	exon:312533	ENSMUST00000108493.2	629378	Dact3	mm10_genes_exons	chr7:16885899
chr2	169826214	169826214	1	*	49.49035371845439	chr2	169633780	169883525	249746	+	intron:70146	ENSMUST00000109159.2	228911	Tshz2	mm10_genes_introns	chr2:169826214
chrX	170676536	170676536	1	*	45.180274006857424	chrX	170676494	170677016	523	+	intron:683632	ENSMUST00000178693.1	107626	Asmt	mm10_genes_introns	chrX:170676536
chr13	74019419	74019419	1	*	49.22758684981092	chr13	74009510	74030749	21240	+	intron:499791	ENSMUST00000140217.7	72948	Tppp	mm10_genes_introns	chr13:74019419
chr2	135998076	135998076	1	*	-60.34891652680637	chr2	135994410	135998676	4267	+	intron:64349	ENSMUST00000184371.7	18798	Plcb4	mm10_genes_introns	chr2:135998076
chr15	76517376	76517376	1	*	50.99463002011186	chr15	76516203	76519673	3471	-	exon:676730	ENSMUST00000096365.4	170729	Scrt1	mm10_genes_exons	chr15:76517376
chr11	97797495	97797495	1	*	-56.31642853133947	chr11	97794000	97797999	4000	+	1to5kb:87699	ENSMUST00000143571.1	16796	Lasp1	mm10_genes_1to5kb	chr11:97797495
chr5	73645666	73645666	1	*	53.72399435124804	chr5	73644482	73647674	3193	-	intron:207598	ENSMUST00000081170.8	24051	Sgcb	mm10_genes_introns	chr5:73645666
chr5	114768522	114768522	1	*	-61.2274377501769	chr5	114767524	114771523	4000	-	1to5kb:41418	ENSMUST00000131993.7	26431	Git2	mm10_genes_1to5kb	chr5:114768522
chr6	84113129	84113129	1	*	-48.178271369738276	chr6	84112234	84113284	1051	+	intron:231696	ENSMUST00000113821.7	26903	Dysf	mm10_genes_introns	chr6:84113129
chr11	42165778	42165778	1	*	36.6419781019087	chr11	42162622	42175901	13280	-	intron:448761	ENSMUST00000205546.1	14394	Gabra1	mm10_genes_introns	chr11:42165778
chr9	28199548	28199548	1	*	-50.75070562554558	chr9	27791447	28404327	612881	+	intron:348921	ENSMUST00000115243.8	330908	Opcml	mm10_genes_introns	chr9:28199548
chr17	34840916	34840916	1	*	65.2760028406589	chr17	34837946	34841945	4000	-	1to5kb:125330	ENSMUST00000077477.11	54402	Stk19	mm10_genes_1to5kb	chr17:34840916
chr7	101322192	101322192	1	*	-52.87746951994379	chr7	101322034	101342497	20464	+	intron:274488	ENSMUST00000163799.8	56018	Stard10	mm10_genes_introns	chr7:101322192
chr15	99473087	99473087	1	*	59.96206330066015	chr15	99471080	99474455	3376	-	intron:569487	ENSMUST00000040313.5	75284	Bcdin3d	mm10_genes_introns	chr15:99473087
chr12	12307602	12307602	1	*	50.45705221571721	chr12	12304323	12340678	36356	+	intron:470895	ENSMUST00000069066.13	76820	Fam49a	mm10_genes_introns	chr12:12307602
chr2	24921640	24921640	1	*	-48.61160356621349	chr2	24920615	24924614	4000	-	1to5kb:14562	ENSMUST00000147147.7	77683	Ehmt1	mm10_genes_1to5kb	chr2:24921640
chr1	89476574	89476574	1	*	54.31458237933662	chr1	89455593	89604597	149005	+	intron:10866	ENSMUST00000027521.14	347722	Agap1	mm10_genes_introns	chr1:89476574
chr7	30955374	30955374	1	*	48.93202026860457	chr7	30955290	30955440	151	-	exon:352233	ENSMUST00000058860.13	22282	Usf2	mm10_genes_exons	chr7:30955374
chrX	139998091	139998091	1	*	-39.641266057686984	chrX	139995083	139999082	4000	-	1to5kb:139592	ENSMUST00000138635.7	237073	Rbm41	mm10_genes_1to5kb	chrX:139998091
chr15	79800878	79800878	1	*	45.71141701742897	chr15	79794476	79803974	9499	-	intron:564636	ENSMUST00000023057.9	73340	Nptxr	mm10_genes_introns	chr15:79800878
chr11	115202329	115202329	1	*	47.69443051960507	chr11	115202213	115205061	2849	+	intron:441209	ENSMUST00000061450.6	320534	Tmem104	mm10_genes_introns	chr11:115202329
chr7	101382889	101382889	1	*	38.67426082762508	chr7	101379020	101383019	4000	+	1to5kb:54844	ENSMUST00000148902.7	69710	Arap1	mm10_genes_1to5kb	chr7:101382889
chr6	34486335	34486335	1	*	-49.13927718082128	chr6	34476423	34487289	10867	+	intron:225876	ENSMUST00000045372.5	12183	Bpgm	mm10_genes_introns	chr6:34486335
chr17	48987054	48987054	1	*	52.1484559491067	chr17	48932819	49069868	137050	+	intron:608155	ENSMUST00000046254.2	70530	Lrfn2	mm10_genes_introns	chr17:48987054
chr11	35933378	35933378	1	*	-49.621390690503034	chr11	35915286	35979970	64685	-	intron:448547	ENSMUST00000018993.6	211652	Wwc1	mm10_genes_introns	chr11:35933378
chr18	60985207	60985207	1	*	-58.839981907646475	chr18	60984777	60988152	3376	+	exon:764784	ENSMUST00000102888.9	12322	Camk2a	mm10_genes_exons	chr18:60985207
chr11	102438668	102438668	1	*	50.077035748291635	chr11	102436981	102438909	1929	-	exon:555652	ENSMUST00000049057.4	217219	Fam171a2	mm10_genes_exons	chr11:102438668
chr11	102438673	102438673	1	*	50.077035748291635	chr11	102436981	102438909	1929	-	exon:555652	ENSMUST00000049057.4	217219	Fam171a2	mm10_genes_exons	chr11:102438673
chr15	66268587	66268587	1	*	44.18429284015323	chr15	66031471	66285835	254365	-	intron:560283	ENSMUST00000070256.8	110862	Kcnq3	mm10_genes_introns	chr15:66268587
chr11	22800599	22800599	1	*	-48.033527410585094	chr11	22800445	22859493	59049	-	intron:447249	ENSMUST00000189990.1	53625	B3gnt2	mm10_genes_introns	chr11:22800599
chr8	118437596	118437596	1	*	48.14249777048314	chr8	118283899	118505603	221705	+	intron:329412	ENSMUST00000117160.1	12554	Cdh13	mm10_genes_introns	chr8:118437596
chr2	140773768	140773768	1	*	-48.50524028140665	chr2	140452687	140825051	372365	+	intron:64658	ENSMUST00000110067.7	72899	Macrod2	mm10_genes_introns	chr2:140773768
chr2	140773809	140773809	1	*	-48.50524028140665	chr2	140452687	140825051	372365	+	intron:64658	ENSMUST00000110067.7	72899	Macrod2	mm10_genes_introns	chr2:140773809
chr11	116063689	116063689	1	*	-38.56233566785319	chr11	116063639	116063835	197	-	exon:559159	ENSMUST00000106450.7	70450	Unc13d	mm10_genes_exons	chr11:116063689
chr3	154850150	154850150	1	*	-42.25318000023367	chr3	154833706	154872092	38387	-	intron:134958	ENSMUST00000143410.6	435766	Tnni3k	mm10_genes_introns	chr3:154850150
chr4	154181217	154181217	1	*	-52.32620432758011	chr4	154177174	154182657	5484	+	intron:153965	ENSMUST00000030897.14	230971	Megf6	mm10_genes_introns	chr4:154181217
chr2	25273425	25273425	1	*	47.07767074718725	chr2	25272478	25273477	1000	+	promoter:9237	ENSMUST00000129300.1	99152	Anapc2	mm10_genes_promoters	chr2:25273425
chr4	137721671	137721671	1	*	-48.15052269306656	chr4	137718989	137722988	4000	+	1to5kb:29489	ENSMUST00000148054.7	110351	Rap1gap	mm10_genes_1to5kb	chr4:137721671
chr11	86959390	86959390	1	*	-42.55140215210859	chr11	86945977	86971808	25832	-	intron:458312	ENSMUST00000018571.4	77864	Ypel2	mm10_genes_introns	chr11:86959390
chr19	4865558	4865558	1	*	-42.360152064465076	chr19	4864559	4868558	4000	-	1to5kb:133010	ENSMUST00000138811.1	11474	Actn3	mm10_genes_1to5kb	chr19:4865558
chr10	99172393	99172393	1	*	-41.94886161242263	chr10	99164950	99192781	27832	+	intron:399921	ENSMUST00000020113.14	382406	Poc1b	mm10_genes_introns	chr10:99172393
chr4	140820881	140820881	1	*	-47.998216167738036	chr4	140819872	140824821	4950	-	intron:171567	ENSMUST00000026378.3	18599	Padi1	mm10_genes_introns	chr4:140820881
chr9	118688790	118688790	1	*	57.39228665240779	chr9	118681781	118689269	7489	+	intron:365144	ENSMUST00000044165.13	104099	Itga9	mm10_genes_introns	chr9:118688790
chr17	47225952	47225952	1	*	-36.08024502949244	chr17	47141910	47230229	88320	+	intron:607695	ENSMUST00000188947.6	224829	Trerf1	mm10_genes_introns	chr17:47225952
chr5	77357564	77357564	1	*	52.02773218941903	chr5	77355672	77407539	51868	-	intron:208089	ENSMUST00000046746.9	29817	Igfbp7	mm10_genes_introns	chr5:77357564
chr19	57042979	57042979	1	*	47.24996574689436	chr19	57041976	57042996	1021	-	intron:670587	ENSMUST00000079360.11	226251	Ablim1	mm10_genes_introns	chr19:57042979
chr1	62729742	62729742	1	*	-53.88176626393402	chr1	62719108	62738288	19181	+	intron:6126	ENSMUST00000126344.1	18187	Nrp2	mm10_genes_introns	chr1:62729742
chr13	96652332	96652332	1	*	52.30329860242442	chr13	96652237	96652657	421	-	intron:513485	ENSMUST00000022176.14	15357	Hmgcr	mm10_genes_introns	chr13:96652332
chr19	25426936	25426936	1	*	43.99825476475638	chr19	25425985	25427976	1992	+	intron:653279	ENSMUST00000049400.14	107351	Kank1	mm10_genes_introns	chr19:25426936
chr6	72677707	72677707	1	*	52.51049322794873	chr6	72649204	72788210	139007	-	intron:247255	ENSMUST00000069536.11	21415	Tcf7l1	mm10_genes_introns	chr6:72677707
chr15	83133196	83133196	1	*	-44.14627712302624	chr15	83133147	83133326	180	-	exon:679991	ENSMUST00000058793.13	73826	Poldip3	mm10_genes_exons	chr15:83133196
chr4	140162083	140162083	1	*	41.65630744804303	chr4	140157574	140246301	88728	-	intron:171300	ENSMUST00000039331.8	230868	Igsf21	mm10_genes_introns	chr4:140162083
chr4	155141130	155141130	1	*	-59.694259351487545	chr4	155128966	155142401	13436	+	intron:154311	ENSMUST00000030915.10	76866	Morn1	mm10_genes_introns	chr4:155141130
chr11	105311854	105311854	1	*	-54.160710018177014	chr11	105292902	105325501	32600	+	intron:439920	ENSMUST00000126931.1	17534	Mrc2	mm10_genes_introns	chr11:105311854
chr4	151099332	151099332	1	*	-46.10153281676833	chr4	151088982	151131541	42560	-	intron:174046	ENSMUST00000169423.8	100072	Camta1	mm10_genes_introns	chr4:151099332
chr18	80362803	80362803	1	*	-44.97522486515974	chr18	80340597	80364158	23562	-	intron:646909	ENSMUST00000077962.7	240444	Kcng2	mm10_genes_introns	chr18:80362803
chr4	155656913	155656913	1	*	44.71934489232	chr4	155656728	155657727	1000	-	promoter:34056	ENSMUST00000139788.7	76580	Mib2	mm10_genes_promoters	chr4:155656913
chr5	112225850	112225850	1	*	61.38046645417211	chr5	112224357	112228054	3698	-	intron:212526	ENSMUST00000182953.7	330166	Miat	mm10_genes_introns	chr5:112225850
chr17	31335437	31335437	1	*	50.231203838365104	chr17	31334887	31335886	1000	+	promoter:121514	ENSMUST00000235220.1	224674	Slc37a1	mm10_genes_promoters	chr17:31335437
chr3	88330612	88330612	1	*	-61.99450358364915	chr3	88328203	88331313	3111	+	exon:130926	ENSMUST00000177005.7	56700	Glmp	mm10_genes_exons	chr3:88330612
chr17	65676399	65676399	1	*	50.118599868595695	chr17	65667976	65696270	28295	-	intron:627464	ENSMUST00000070673.8	106572	Rab31	mm10_genes_introns	chr17:65676399
chr8	16717901	16717901	1	*	-49.863047930932694	chr8	16710703	17027224	316522	-	intron:333069	ENSMUST00000082104.6	94109	Csmd1	mm10_genes_introns	chr8:16717901
chr10	120800868	120800868	1	*	-51.27444558403453	chr10	120791500	120825107	33608	-	intron:417827	ENSMUST00000092143.11	320183	Msrb3	mm10_genes_introns	chr10:120800868
chr18	31954521	31954521	1	*	-49.43413185050943	chr18	31953834	31954833	1000	+	promoter:127486	ENSMUST00000223753.1	225341	Lims2	mm10_genes_promoters	chr18:31954521
chr9	121419626	121419626	1	*	63.100513561175816	chr9	121392052	121431478	39427	+	intron:366023	ENSMUST00000211301.1	67095	Trak1	mm10_genes_introns	chr9:121419626
chrX	101946229	101946229	1	*	47.67452921410092	chrX	101849848	101947653	97806	+	intron:678558	ENSMUST00000125115.1	100042480	Nhsl2	mm10_genes_introns	chrX:101946229
chr13	46869651	46869651	1	*	60.94312067612382	chr13	46864832	46929215	64384	-	intron:507070	ENSMUST00000056978.7	16553	Kif13a	mm10_genes_introns	chr13:46869651
chr1	89782241	89782241	1	*	34.49773411873287	chr1	89766465	89789162	22698	+	intron:10877	ENSMUST00000027521.14	347722	Agap1	mm10_genes_introns	chr1:89782241
chr18	11841384	11841384	1	*	-51.77339688449012	chr18	11840870	11841869	1000	-	promoter:129231	ENSMUST00000224036.1	100316686	Mir1901	mm10_genes_promoters	chr18:11841384
chr4	128889651	128889651	1	*	-52.22362506297548	chr4	128886787	128896819	10033	+	intron:147985	ENSMUST00000147852.1	67525	Trim62	mm10_genes_introns	chr4:128889651
chr11	97138797	97138797	1	*	44.555712395484804	chr11	97138622	97139334	713	-	exon:551988	ENSMUST00000066078.11	73174	Tbkbp1	mm10_genes_exons	chr11:97138797
chr6	126739274	126739274	1	*	-46.75848730520674	chr6	126737812	126741811	4000	-	1to5kb:50257	ENSMUST00000128137.1	16494	Kcna6	mm10_genes_1to5kb	chr6:126739274
chr9	70211834	70211834	1	*	-48.66315608183982	chr9	70207704	70286911	79208	+	intron:355946	ENSMUST00000213863.1	71602	Myo1e	mm10_genes_introns	chr9:70211834
chr11	106262584	106262584	1	*	-41.71481092680078	chr11	106262581	106262691	111	+	exon:528438	ENSMUST00000021049.8	19184	Psmc5	mm10_genes_exons	chr11:106262584
chr10	78036706	78036706	1	*	44.7489465647532	chr10	78036685	78036784	100	-	exon:494785	ENSMUST00000128241.7	11634	Aire	mm10_genes_exons	chr10:78036706
chr9	113979868	113979868	1	*	-53.0603738232632	chr9	113979671	113983984	4314	-	intron:385564	ENSMUST00000117537.7	72179	Fbxl2	mm10_genes_introns	chr9:113979868
chr3	127628960	127628960	1	*	58.16844260342919	chr3	127628135	127632134	4000	+	1to5kb:22370	ENSMUST00000029587.8	11924	Neurog2	mm10_genes_1to5kb	chr3:127628960
chr4	155854467	155854467	1	*	-52.13025849818437	chr4	155853572	155854571	1000	+	promoter:30232	ENSMUST00000129450.1	13542	Dvl1	mm10_genes_promoters	chr4:155854467
chr3	130264589	130264589	1	*	-45.54621454617974	chr3	130182835	130386874	204040	+	intron:117261	ENSMUST00000143830.2	77018	Col25a1	mm10_genes_introns	chr3:130264589
chr11	33824603	33824603	1	*	-67.12136350462272	chr11	33645816	33843129	197314	-	intron:448295	ENSMUST00000101368.8	70357	Kcnip1	mm10_genes_introns	chr11:33824603
chr2	163870284	163870284	1	*	63.86002992340853	chr2	163865905	163879093	13189	-	intron:99964	ENSMUST00000044734.2	241770	Rims4	mm10_genes_introns	chr2:163870284
chr5	148281495	148281495	1	*	33.75594892599351	chr5	148277667	148288873	11207	+	intron:198777	ENSMUST00000085558.10	77521	Mtus2	mm10_genes_introns	chr5:148281495
chr1	20574939	20574939	1	*	39.58867577434522	chr1	20571441	20584059	12619	-	intron:23120	ENSMUST00000088448.11	241035	Pkhd1	mm10_genes_introns	chr1:20574939
chr11	118725751	118725751	1	*	-40.002225362038516	chr11	118670754	118811277	140524	-	intron:467730	ENSMUST00000117731.7	52897	Rbfox3	mm10_genes_introns	chr11:118725751
chr2	13009187	13009187	1	*	-61.380701692200915	chr2	13004445	13010259	5815	-	intron:73764	ENSMUST00000061545.6	227580	C1ql3	mm10_genes_introns	chr2:13009187
chr10	119753861	119753861	1	*	-36.939513992177055	chr10	119454423	119929900	475478	+	intron:401388	ENSMUST00000077871.13	74053	Grip1	mm10_genes_introns	chr10:119753861
chr11	113444703	113444703	1	*	51.99743431144197	chr11	113369899	113463971	94073	-	intron:465443	ENSMUST00000071539.9	69806	Slc39a11	mm10_genes_introns	chr11:113444703
chr5	117231188	117231188	1	*	-45.02844317717718	chr5	117228080	117241095	13016	+	intron:191590	ENSMUST00000111978.7	330177	Taok3	mm10_genes_introns	chr5:117231188
chr19	30113209	30113209	1	*	60.48267808074517	chr19	30110785	30113721	2937	-	intron:665276	ENSMUST00000025778.8	104174	Gldc	mm10_genes_introns	chr19:30113209
chrX	140541248	140541248	1	*	39.29063613892494	chrX	140539537	140542156	2620	-	exon:832255	ENSMUST00000133023.1	14605	Tsc22d3	mm10_genes_exons	chrX:140541248
chr3	37613770	37613770	1	*	-49.073013042617966	chr3	37612913	37613912	1000	+	promoter:20079	ENSMUST00000144981.7	75947	4930594O21Rik	mm10_genes_promoters	chr3:37613770
chr18	76145878	76145878	1	*	40.51511157143551	chr18	76145681	76148564	2884	+	exon:767927	ENSMUST00000058997.14	207259	Zbtb7c	mm10_genes_exons	chr18:76145878
chr3	108880763	108880763	1	*	-45.038538748307104	chr3	108876694	108881325	4632	-	intron:130730	ENSMUST00000180063.7	320181	Fndc7	mm10_genes_introns	chr3:108880763
chr8	120004556	120004556	1	*	-46.7673248809315	chr8	119992601	120010433	17833	+	intron:329670	ENSMUST00000132583.7	78892	Crispld2	mm10_genes_introns	chr8:120004556
chr11	77764298	77764298	1	*	-51.16022315113704	chr11	77761736	77765735	4000	+	1to5kb:86886	ENSMUST00000108376.8	360013	Myo18a	mm10_genes_1to5kb	chr11:77764298
chr9	44178494	44178494	1	*	-60.0873625296427	chr9	44173400	44200959	27560	-	intron:372010	ENSMUST00000206720.1	12402	Cbl	mm10_genes_introns	chr9:44178494
chr14	75842163	75842163	1	*	-66.08460405643208	chr14	75840093	75844092	4000	+	1to5kb:106937	ENSMUST00000110894.8	22070	Tpt1	mm10_genes_1to5kb	chr14:75842163
chr11	115257857	115257857	1	*	51.619627057802205	chr11	115257773	115258371	599	-	exon:558516	ENSMUST00000003351.12	14813	Grin2c	mm10_genes_exons	chr11:115257857
chrX	51018383	51018383	1	*	-54.8506023828238	chrX	51018019	51019018	1000	-	promoter:138242	ENSMUST00000053593.7	72065	Rap2c	mm10_genes_promoters	chrX:51018383
chr18	68211853	68211853	1	*	46.47287337914217	chr18	68106692	68235654	128963	+	intron:638081	ENSMUST00000063775.4	52662	Ldlrad4	mm10_genes_introns	chr18:68211853
chr19	5844519	5844519	1	*	67.87365657021186	chr19	5844438	5845437	1000	-	promoter:133215	ENSMUST00000183800.1	66961	Neat1	mm10_genes_promoters	chr19:5844519
chr8	75120247	75120247	1	*	-39.77021109512325	chr8	75119900	75120899	1000	+	promoter:65325	ENSMUST00000212648.1	17218	Mcm5	mm10_genes_promoters	chr8:75120247
chr1	106566294	106566294	1	*	61.75082276377309	chr1	106543399	106712304	168906	-	intron:33131	ENSMUST00000112751.1	12043	Bcl2	mm10_genes_introns	chr1:106566294
chr14	117891760	117891760	1	*	-50.40941538516528	chr14	117888666	117951137	62472	+	intron:528762	ENSMUST00000088483.9	23888	Gpc6	mm10_genes_introns	chr14:117891760
chrX	36796326	36796326	1	*	-57.777068548853336	chrX	36796279	36797278	1000	+	promoter:135435	ENSMUST00000156672.1	11740	Slc25a5	mm10_genes_promoters	chrX:36796326
chr2	164334314	164334314	1	*	49.43702561743088	chr2	164334224	164334396	173	+	exon:82572	ENSMUST00000017148.7	20944	Svs5	mm10_genes_exons	chr2:164334314
chr3	9817357	9817357	1	*	47.01993086925003	chr3	9787321	9833210	45890	-	intron:120422	ENSMUST00000161949.7	94212	Pag1	mm10_genes_introns	chr3:9817357
chr17	25566258	25566258	1	*	50.39596776747969	chr17	25565358	25569357	4000	+	1to5kb:120833	ENSMUST00000163493.3	72834	2810468N07Rik	mm10_genes_1to5kb	chr17:25566258
chr17	25566269	25566269	1	*	50.39596776747969	chr17	25565358	25569357	4000	+	1to5kb:120833	ENSMUST00000163493.3	72834	2810468N07Rik	mm10_genes_1to5kb	chr17:25566269
chr1	164196147	164196147	1	*	-51.79172131000057	chr1	164195726	164198711	2986	+	intron:17847	ENSMUST00000086040.5	14067	F5	mm10_genes_introns	chr1:164196147
chr5	150152443	150152443	1	*	37.96963472931778	chr5	150118812	150196562	77751	+	intron:199170	ENSMUST00000200960.3	320365	Fry	mm10_genes_introns	chr5:150152443
chr12	21209434	21209434	1	*	-58.16424935008276	chr12	21206389	21212808	6420	+	intron:471397	ENSMUST00000064595.14	211914	Asap2	mm10_genes_introns	chr12:21209434
chr7	64949177	64949177	1	*	49.868854129448245	chr7	64856220	64983380	127161	-	intron:298730	ENSMUST00000119118.7	70638	Fam189a1	mm10_genes_introns	chr7:64949177
chr15	98614251	98614251	1	*	68.59469111572099	chr15	98611077	98615076	4000	-	1to5kb:114993	ENSMUST00000227501.1	11512	Adcy6	mm10_genes_1to5kb	chr15:98614251
chr3	50258706	50258706	1	*	-50.25021271542618	chr3	49893148	50377563	484416	-	intron:122352	ENSMUST00000194462.5	26570	Slc7a11	mm10_genes_introns	chr3:50258706
chr3	108940065	108940065	1	*	47.12010727070535	chr3	108939084	108940083	1000	+	promoter:22079	ENSMUST00000059946.10	66715	Henmt1	mm10_genes_promoters	chr3:108940065
chr1	134183552	134183552	1	*	-41.706944638085275	chr1	134182801	134183800	1000	+	promoter:2720	ENSMUST00000144819.1	12654	Chil1	mm10_genes_promoters	chr1:134183552
chr11	121066261	121066261	1	*	-42.200530401090695	chr11	121064570	121068569	4000	-	1to5kb:93325	ENSMUST00000039309.11	58210	Sectm1b	mm10_genes_1to5kb	chr11:121066261
chr8	34950561	34950561	1	*	41.905226305888036	chr8	34940921	34965013	24093	-	intron:335220	ENSMUST00000033929.5	21951	Tnks	mm10_genes_introns	chr8:34950561
chr2	31801639	31801639	1	*	-56.85183059345572	chr2	31800206	31803541	3336	+	exon:60402	ENSMUST00000075759.12	11350	Abl1	mm10_genes_exons	chr2:31801639
chr11	109270074	109270074	1	*	-48.47387325312542	chr11	109269005	109273275	4271	-	intron:464869	ENSMUST00000020920.9	19739	Rgs9	mm10_genes_introns	chr11:109270074
chr4	134097076	134097076	1	*	-49.1643905708162	chr4	134096042	134100041	4000	-	1to5kb:33133	ENSMUST00000145122.1	23833	Cd52	mm10_genes_1to5kb	chr4:134097076
chr12	80714091	80714091	1	*	-44.737703441235105	chr12	80708235	80717220	8986	+	intron:476756	ENSMUST00000140770.1	217682	Plekhd1	mm10_genes_introns	chr12:80714091
chr10	52384814	52384814	1	*	59.26559774302683	chr10	52383972	52387971	4000	+	1to5kb:79031	ENSMUST00000219730.1	66650	Nepn	mm10_genes_1to5kb	chr10:52384814
chr7	12422012	12422012	1	*	54.60843525381307	chr7	12421847	12422389	543	-	intron:287559	ENSMUST00000080348.11	619331	Zfp551	mm10_genes_introns	chr7:12422012
chr11	95296037	95296037	1	*	-46.45240006403123	chr11	95292038	95296037	4000	-	1to5kb:91742	ENSMUST00000149356.1	217127	Kat7	mm10_genes_1to5kb	chr11:95296037
chr7	108542638	108542638	1	*	-45.445138671802546	chr7	108539527	108543526	4000	+	1to5kb:55320	ENSMUST00000078162.3	259143	Olfr503	mm10_genes_1to5kb	chr7:108542638
chr15	59078146	59078146	1	*	-49.87283796402483	chr15	59058423	59081455	23033	-	intron:559478	ENSMUST00000080371.7	211401	Mtss1	mm10_genes_introns	chr15:59078146
chr11	90245516	90245516	1	*	48.51827184562872	chr11	90244456	90248455	4000	+	1to5kb:87451	ENSMUST00000107887.7	67468	Mmd	mm10_genes_1to5kb	chr11:90245516
chr10	45101570	45101570	1	*	41.57099013565605	chr10	45097515	45107771	10257	+	intron:390868	ENSMUST00000099858.3	19072	Prep	mm10_genes_introns	chr10:45101570
chrX	56875214	56875214	1	*	-52.91766464680613	chrX	56872621	56913142	40522	+	intron:675042	ENSMUST00000154818.7	236798	Adgrg4	mm10_genes_introns	chrX:56875214
chr4	117445940	117445940	1	*	39.990489071619336	chr4	117307679	117489588	181910	-	intron:165245	ENSMUST00000030439.14	66743	Rnf220	mm10_genes_introns	chr4:117445940
chr6	114400320	114400320	1	*	-54.83606370651637	chr6	114398666	114402665	4000	+	1to5kb:46057	ENSMUST00000161650.2	15465	Hrh1	mm10_genes_1to5kb	chr6:114400320
chr7	27678295	27678295	1	*	-50.952319241769786	chr7	27675595	27679594	4000	-	1to5kb:58441	ENSMUST00000036453.13	269881	Map3k10	mm10_genes_1to5kb	chr7:27678295
chr2	90562204	90562204	1	*	53.9781411057812	chr2	90474990	90580155	105166	-	intron:88219	ENSMUST00000168621.2	19271	Ptprj	mm10_genes_introns	chr2:90562204
chrX	137049662	137049662	1	*	-45.53742216516562	chrX	137049594	137049872	279	+	5UTR:92638	ENSMUST00000047852.7	245622	Fam199x	mm10_genes_5UTRs	chrX:137049662
chr6	146171048	146171048	1	*	52.835255038049475	chr6	146166672	146171223	4552	-	intron:257871	ENSMUST00000079573.12	16439	Itpr2	mm10_genes_introns	chr6:146171048
chr6	146171083	146171083	1	*	52.835255038049475	chr6	146166672	146171223	4552	-	intron:257871	ENSMUST00000079573.12	16439	Itpr2	mm10_genes_introns	chr6:146171083
chr4	140130982	140130982	1	*	-67.38464480842057	chr4	140107377	140157460	50084	-	intron:171299	ENSMUST00000039331.8	230868	Igsf21	mm10_genes_introns	chr4:140130982
chr3	129573001	129573001	1	*	-47.405276961729335	chr3	129532769	129605040	72272	+	intron:117194	ENSMUST00000199910.4	170439	Elovl6	mm10_genes_introns	chr3:129573001
chr5	146783431	146783431	1	*	-45.44327118226351	chr5	146769018	146794614	25597	-	intron:222204	ENSMUST00000085614.5	22217	Usp12	mm10_genes_introns	chr5:146783431
chr3	52106568	52106568	1	*	41.18845080150195	chr3	52106077	52110076	4000	-	1to5kb:23687	ENSMUST00000121440.3	433586	Maml3	mm10_genes_1to5kb	chr3:52106568
chr4	118209599	118209599	1	*	-64.41902317209369	chr4	118208213	118209889	1677	-	exon:198065	ENSMUST00000049074.12	19268	Ptprf	mm10_genes_exons	chr4:118209599
chr14	105503101	105503101	1	*	-49.680815335513614	chr14	105502576	105503575	1000	+	promoter:107202	ENSMUST00000188698.1	74864	4930449E01Rik	mm10_genes_promoters	chr14:105503101
chr4	149427276	149427276	1	*	42.05237879342924	chr4	149426750	149427749	1000	-	promoter:33761	ENSMUST00000103212.9	63958	Ube4b	mm10_genes_promoters	chr4:149427276
chr18	12874909	12874909	1	*	-56.55829416305529	chr18	12871185	12882195	11011	-	intron:641342	ENSMUST00000074352.10	64291	Osbpl1a	mm10_genes_introns	chr18:12874909
chr14	122462918	122462918	1	*	54.10043861760636	chr14	122461022	122465021	4000	-	1to5kb:110217	ENSMUST00000143084.1	65100	Zic5	mm10_genes_1to5kb	chr14:122462918
chr19	45794690	45794690	1	*	54.304549235783114	chr19	45794300	45795299	1000	-	promoter:134557	ENSMUST00000159210.8	80906	Kcnip2	mm10_genes_promoters	chr19:45794690
chr15	78169822	78169822	1	*	60.311065348161286	chr15	78167937	78171936	4000	-	1to5kb:114094	ENSMUST00000231069.1	67042	Ift27	mm10_genes_1to5kb	chr15:78169822
chrX	98890487	98890487	1	*	-43.710515579284994	chrX	98890385	98891384	1000	-	promoter:139000	ENSMUST00000140598.1	94190	Ophn1	mm10_genes_promoters	chrX:98890487
chr9	57539555	57539555	1	*	-49.284057763780986	chr9	57538889	57540654	1766	+	intron:353078	ENSMUST00000093833.5	78323	Fam219b	mm10_genes_introns	chr9:57539555
chr7	29505519	29505519	1	*	52.004811543445804	chr7	29505461	29506460	1000	-	promoter:58605	ENSMUST00000085809.10	74206	Sipa1l3	mm10_genes_promoters	chr7:29505519
chr16	22430396	22430396	1	*	35.891188068439526	chr16	22412975	22435876	22902	-	intron:587273	ENSMUST00000079601.12	104156	Etv5	mm10_genes_introns	chr16:22430396
chr1	167245426	167245426	1	*	50.44996474485113	chr1	167244159	167248158	4000	-	1to5kb:7718	ENSMUST00000027839.13	80914	Uck2	mm10_genes_1to5kb	chr1:167245426
chr9	75232921	75232921	1	*	48.626030378396045	chr9	75232176	75242761	10586	+	intron:356980	ENSMUST00000036555.7	208943	Myo5c	mm10_genes_introns	chr9:75232921
chr11	109500306	109500306	1	*	-41.18505570383445	chr11	109490651	109517241	26591	+	intron:440803	ENSMUST00000020928.12	74008	Arsg	mm10_genes_introns	chr11:109500306
chr10	81382247	81382247	1	*	-64.57631713066696	chr10	81379428	81383427	4000	+	1to5kb:80164	ENSMUST00000072751.12	102115	Dohh	mm10_genes_1to5kb	chr10:81382247
chr2	59779556	59779556	1	*	56.74107997745048	chr2	59778711	59779710	1000	+	promoter:10400	ENSMUST00000136248.1	66860	Tanc1	mm10_genes_promoters	chr2:59779556
chr4	138716889	138716889	1	*	53.177020263291176	chr4	138716706	138719709	3004	-	intron:171131	ENSMUST00000146415.1	212190	Ubxn10	mm10_genes_introns	chr4:138716889
chr17	28007901	28007901	1	*	-37.856605086260195	chr17	28007345	28008045	701	+	5UTR:81256	ENSMUST00000139173.2	224650	Anks1	mm10_genes_5UTRs	chr17:28007901
chr2	68374462	68374462	1	*	-53.94721861595902	chr2	68369106	68390913	21808	-	intron:83573	ENSMUST00000102715.3	53416	Stk39	mm10_genes_introns	chr2:68374462
chr13	112345525	112345525	1	*	40.26175504693318	chr13	112336276	112348733	12458	+	intron:502491	ENSMUST00000168684.1	77318	Ankrd55	mm10_genes_introns	chr13:112345525
chr11	112716952	112716952	1	*	-37.93001062078874	chr11	112691436	112722296	30861	-	intron:465416	ENSMUST00000137081.7	217294	BC006965	mm10_genes_introns	chr11:112716952
chr16	20701657	20701657	1	*	48.89963310521463	chr16	20701424	20703044	1621	+	exon:691684	ENSMUST00000118919.8	78408	Fam131a	mm10_genes_exons	chr16:20701657
chr6	128386732	128386732	1	*	-66.25644129099612	chr6	128375600	128400106	24507	+	intron:239168	ENSMUST00000204223.1	60345	Nrip2	mm10_genes_introns	chr6:128386732
chr11	102264298	102264298	1	*	55.0760589488152	chr11	102263743	102267742	4000	+	1to5kb:88047	ENSMUST00000036467.4	217217	Asb16	mm10_genes_1to5kb	chr11:102264298
chr13	94395980	94395980	1	*	-49.18158464036528	chr13	94394794	94403337	8544	+	intron:500993	ENSMUST00000022196.4	11774	Ap3b1	mm10_genes_introns	chr13:94395980
chrX	157491566	157491566	1	*	43.322322096064646	chrX	157491373	157492372	1000	-	promoter:139870	ENSMUST00000123770.1	20603	Sms	mm10_genes_promoters	chrX:157491566
chr1	185361651	185361651	1	*	45.62697262879435	chr1	185358044	185362043	4000	+	1to5kb:4022	ENSMUST00000192284.5	107508	Eprs	mm10_genes_1to5kb	chr1:185361651
chr5	125037957	125037957	1	*	-46.86029406065639	chr5	125037861	125037997	137	-	exon:258597	ENSMUST00000125053.7	20602	Ncor2	mm10_genes_exons	chr5:125037957
chr10	121439450	121439450	1	*	54.183624648147024	chr10	121417193	121476002	58810	-	intron:417893	ENSMUST00000026902.8	192678	Rassf3	mm10_genes_introns	chr10:121439450
chr5	65036820	65036820	1	*	40.96660332930274	chr5	65034445	65038687	4243	+	intron:183911	ENSMUST00000031080.14	68303	Fam114a1	mm10_genes_introns	chr5:65036820
chr9	122747233	122747233	1	*	-49.47470753463639	chr9	122746346	122747345	1000	+	promoter:74094	ENSMUST00000178679.2	671232	Topaz1	mm10_genes_promoters	chr9:122747233
chr5	114269469	114269469	1	*	40.68230161124761	chr5	114263155	114272972	9818	-	intron:213276	ENSMUST00000044790.11	116810	Foxn4	mm10_genes_introns	chr5:114269469
chr1	131751988	131751988	1	*	-55.40816887887504	chr1	131750723	131752843	2121	+	intron:14104	ENSMUST00000049027.9	320718	Slc26a9	mm10_genes_introns	chr1:131751988
chr17	47390783	47390783	1	*	-45.23006468386414	chr17	47389260	47390980	1721	+	intron:607815	ENSMUST00000024774.13	107477	Guca1b	mm10_genes_introns	chr17:47390783
chr15	90997993	90997993	1	*	49.10544393534068	chr15	90997833	90998055	223	-	exon:682037	ENSMUST00000100304.10	16564	Kif21a	mm10_genes_exons	chr15:90997993
chr11	113444706	113444706	1	*	66.5950717480685	chr11	113369899	113463971	94073	-	intron:465443	ENSMUST00000071539.9	69806	Slc39a11	mm10_genes_introns	chr11:113444706
chr6	91706200	91706200	1	*	47.21908118550446	chr6	91699033	91723281	24249	+	intron:233918	ENSMUST00000032185.8	21366	Slc6a6	mm10_genes_introns	chr6:91706200
chr4	116174559	116174559	1	*	42.99510708058649	chr4	116173630	116256167	82538	+	intron:145719	ENSMUST00000216692.1	18710	Pik3r3	mm10_genes_introns	chr4:116174559
chr14	46853946	46853946	1	*	-43.732682766063014	chr14	46853699	46854193	495	+	exon:627753	ENSMUST00000068532.9	68755	Cgrrf1	mm10_genes_exons	chr14:46853946
chr10	42949977	42949977	1	*	-42.46855012226791	chr10	42947142	42955888	8747	+	intron:390710	ENSMUST00000063063.13	268297	Scml4	mm10_genes_introns	chr10:42949977
chr10	77260548	77260548	1	*	49.91696371503973	chr10	77257447	77261446	4000	+	1to5kb:79673	ENSMUST00000218064.1	80294	Pofut2	mm10_genes_1to5kb	chr10:77260548
chr13	63305729	63305729	1	*	52.66166006708273	chr13	63302284	63306283	4000	-	1to5kb:103116	ENSMUST00000175000.2	100526474	Mir3074-1	mm10_genes_1to5kb	chr13:63305729
chr11	68690677	68690677	1	*	-38.902453722743275	chr11	68690559	68691558	1000	+	promoter:86199	ENSMUST00000141558.1	77579	Myh10	mm10_genes_promoters	chr11:68690677
chr10	20227793	20227793	1	*	-44.80003764524768	chr10	20224795	20228794	4000	+	1to5kb:78396	ENSMUST00000213312.1	17761	Map7	mm10_genes_1to5kb	chr10:20227793
chr3	142061689	142061689	1	*	-52.83602651533885	chr3	141880517	142078125	197609	-	intron:133504	ENSMUST00000098568.7	12167	Bmpr1b	mm10_genes_introns	chr3:142061689
chr7	16317860	16317860	1	*	-50.86393594170855	chr7	16317118	16318205	1088	+	exon:312258	ENSMUST00000002152.12	170770	Bbc3	mm10_genes_exons	chr7:16317860
chr9	35132531	35132531	1	*	-43.64389517767749	chr9	35129575	35136343	6769	-	intron:370467	ENSMUST00000034539.11	69305	Dcps	mm10_genes_introns	chr9:35132531
chr7	96385743	96385743	1	*	38.063604250580916	chr7	96355412	96436759	81348	+	intron:273286	ENSMUST00000107162.7	23966	Tenm4	mm10_genes_introns	chr7:96385743
chr2	170604109	170604109	1	*	56.92600413795883	chr2	170603018	170607017	4000	-	1to5kb:19177	ENSMUST00000062355.1	67637	4930470P17Rik	mm10_genes_1to5kb	chr2:170604109
chr14	25481472	25481472	1	*	-37.50197231146058	chr14	25459557	25502654	43098	+	intron:518934	ENSMUST00000161766.7	328365	Zmiz1	mm10_genes_introns	chr14:25481472
chr1	72184369	72184369	1	*	51.89952558682087	chr1	72164163	72192042	27880	-	intron:28783	ENSMUST00000048860.8	381269	Mreg	mm10_genes_introns	chr1:72184369
chr14	87000268	87000268	1	*	-53.96409331841527	chr14	87000115	87002801	2687	-	intron:541945	ENSMUST00000022599.13	56419	Diaph3	mm10_genes_introns	chr14:87000268
chr1	58903978	58903978	1	*	37.64952243002908	chr1	58900449	58904182	3734	-	exon:32538	ENSMUST00000027186.11	70827	Trak2	mm10_genes_exons	chr1:58903978
chr8	117262061	117262061	1	*	-44.51948608789208	chr8	117257402	117377074	119673	+	intron:329295	ENSMUST00000166750.8	74440	Cmip	mm10_genes_introns	chr8:117262061
chr2	136051044	136051044	1	*	-50.32876907227316	chr2	136047239	136051238	4000	+	1to5kb:12555	ENSMUST00000144403.7	76161	Lamp5	mm10_genes_1to5kb	chr2:136051044
chr2	25465849	25465849	1	*	-43.61033062473725	chr2	25461953	25465952	4000	-	1to5kb:14683	ENSMUST00000133919.7	227622	Paxx	mm10_genes_1to5kb	chr2:25465849
chr6	118827603	118827603	1	*	-48.544257334353695	chr6	118780325	119052600	272276	-	intron:252032	ENSMUST00000186889.6	12288	Cacna1c	mm10_genes_introns	chr6:118827603
chr7	45000289	45000289	1	*	-49.279282767376685	chr7	44999501	45000500	1000	+	promoter:53305	ENSMUST00000208143.1	54131	Irf3	mm10_genes_promoters	chr7:45000289
chr16	11670689	11670689	1	*	-38.5873035241741	chr16	11660628	11714913	54286	+	intron:572258	ENSMUST00000180792.7	74478	Snx29	mm10_genes_introns	chr16:11670689
chr10	61197981	61197981	1	*	48.32929235900995	chr10	61197112	61198959	1848	-	exon:491796	ENSMUST00000092486.10	237360	Adamts14	mm10_genes_exons	chr10:61197981
chr10	85598520	85598520	1	*	-44.0563113480404	chr10	85598401	85598577	177	+	exon:478868	ENSMUST00000105306.2	74007	Btbd11	mm10_genes_exons	chr10:85598520
chr13	68591433	68591433	1	*	-46.72947557593073	chr13	68590221	68591930	1710	+	intron:499248	ENSMUST00000222068.1	69577	Fastkd3	mm10_genes_introns	chr13:68591433
chr18	10376044	10376044	1	*	45.358592812259104	chr18	10325290	10449929	124640	+	intron:631029	ENSMUST00000173356.7	381157	Greb1l	mm10_genes_introns	chr18:10376044
chr14	8613562	8613562	1	*	48.89840150344414	chr14	8578463	8644396	65934	-	intron:529731	ENSMUST00000102996.3	74430	4930452B06Rik	mm10_genes_introns	chr14:8613562
chr9	41327066	41327066	1	*	-38.578885165825916	chr9	41326077	41327076	1000	+	promoter:71049	ENSMUST00000233562.1	73144	Mir100hg	mm10_genes_promoters	chr9:41327066
chr8	106871390	106871390	1	*	46.0681907681318	chr8	106870415	106873907	3493	+	intron:327791	ENSMUST00000034385.11	15118	Has3	mm10_genes_introns	chr8:106871390
chr5	76850715	76850715	1	*	45.491395117868436	chr5	76848982	76851335	2354	+	intron:185627	ENSMUST00000238963.1	320827	C530008M17Rik	mm10_genes_introns	chr5:76850715
chr14	54434054	54434054	1	*	49.16308717749468	chr14	54433592	54437591	4000	+	1to5kb:106258	ENSMUST00000226710.1	17387	Mmp14	mm10_genes_1to5kb	chr14:54434054
chr1	36269756	36269756	1	*	-51.565012858514926	chr1	36269702	36273337	3636	-	intron:24423	ENSMUST00000056946.7	214854	Neurl3	mm10_genes_introns	chr1:36269756
chr7	73332187	73332187	1	*	46.63623241581443	chr7	73316443	73375516	59074	-	intron:299231	ENSMUST00000181299.2	319783	A730056A06Rik	mm10_genes_introns	chr7:73332187
chr16	17695085	17695085	1	*	-48.0021280842739	chr16	17685505	17697606	12102	-	intron:585970	ENSMUST00000232645.1	94112	Med15	mm10_genes_introns	chr16:17695085
chr15	99678141	99678141	1	*	46.69089204277867	chr15	99673064	99694693	21630	+	intron:554514	ENSMUST00000023758.8	11419	Asic1	mm10_genes_introns	chr15:99678141
chr14	60013565	60013565	1	*	-49.163497447043746	chr14	60012449	60015873	3425	-	intron:539064	ENSMUST00000080368.12	50769	Atp8a2	mm10_genes_introns	chr14:60013565
chr18	69419381	69419381	1	*	-56.950763839840945	chr18	69349145	69461861	112717	+	intron:638133	ENSMUST00000203002.3	21413	Tcf4	mm10_genes_introns	chr18:69419381
chr7	71966935	71966935	1	*	43.79466871682241	chr7	71961257	71969007	7751	+	intron:270847	ENSMUST00000205268.1	75451	1700011C11Rik	mm10_genes_introns	chr7:71966935
chr9	110438251	110438251	1	*	43.188064291832426	chr9	110437484	110438897	1414	-	intron:384746	ENSMUST00000068025.12	270201	Klhl18	mm10_genes_introns	chr9:110438251
chr18	35683425	35683425	1	*	-56.0522689784649	chr18	35683325	35686667	3343	-	intron:643028	ENSMUST00000025208.6	76594	Dnajc18	mm10_genes_introns	chr18:35683425
chr10	122918722	122918722	1	*	-49.195577660911056	chr10	122907615	122920693	13079	+	intron:401897	ENSMUST00000161487.7	319468	Ppm1h	mm10_genes_introns	chr10:122918722
chr12	110661325	110661325	1	*	-48.61983021660957	chr12	110658189	110662188	4000	+	1to5kb:95849	ENSMUST00000166323.1	13424	Dync1h1	mm10_genes_1to5kb	chr12:110661325
chr10	14099849	14099849	1	*	-45.08262037605355	chr10	14066685	14110664	43980	+	intron:388119	ENSMUST00000187083.6	15273	Hivep2	mm10_genes_introns	chr10:14099849
chr10	89150870	89150870	1	*	44.64935922508502	chr10	89149445	89257431	107987	-	intron:415125	ENSMUST00000182462.7	320091	Ano4	mm10_genes_introns	chr10:89150870
chr4	114410698	114410698	1	*	-45.45883065595173	chr4	114409454	114580290	170837	+	intron:145115	ENSMUST00000094894.3	666048	Trabd2b	mm10_genes_introns	chr4:114410698
chr12	71202172	71202172	1	*	42.64590414718844	chr12	71194467	71216041	21575	+	intron:475116	ENSMUST00000149564.7	76967	2700049A03Rik	mm10_genes_introns	chr12:71202172
chr5	74313812	74313812	1	*	-53.31016272954787	chr5	74236585	74397653	161069	-	intron:207629	ENSMUST00000072857.12	212986	Scfd2	mm10_genes_introns	chr5:74313812
chr3	84594700	84594700	1	*	43.292056186729155	chr3	84593574	84597032	3459	+	exon:129627	ENSMUST00000062623.3	403175	Tigd4	mm10_genes_exons	chr3:84594700
chr8	70331330	70331330	1	*	-52.60876062669622	chr8	70330699	70331592	894	+	exon:385634	ENSMUST00000165819.8	14559	Gdf1	mm10_genes_exons	chr8:70331330
chr7	144397890	144397890	1	*	-52.272282561910224	chr7	144396432	144405329	8898	+	intron:285416	ENSMUST00000105902.7	210274	Shank2	mm10_genes_introns	chr7:144397890
chr8	84127750	84127750	1	*	45.28175308793291	chr8	84126818	84127817	1000	+	promoter:65519	ENSMUST00000147175.1	244550	Podnl1	mm10_genes_promoters	chr8:84127750
chr15	89288589	89288589	1	*	-48.042724371020576	chr15	89288236	89288725	490	-	exon:681517	ENSMUST00000123791.7	77980	Sbf1	mm10_genes_exons	chr15:89288589
chr8	71385762	71385762	1	*	-57.17022340409407	chr8	71382907	71386906	4000	-	1to5kb:68446	ENSMUST00000132630.1	13864	Nr2f6	mm10_genes_1to5kb	chr8:71385762
chr5	122724441	122724441	1	*	49.184690807987565	chr5	122723655	122724654	1000	+	promoter:37422	ENSMUST00000132062.1	18438	P2rx4	mm10_genes_promoters	chr5:122724441
chr17	56512416	56512416	1	*	49.59648461883484	chr17	56512306	56512431	126	-	5UTR:84967	ENSMUST00000052211.3	20834	Znrf4	mm10_genes_5UTRs	chr17:56512416
chr15	99139518	99139518	1	*	44.08306351124804	chr15	99126027	99149633	23607	+	intron:554121	ENSMUST00000230628.1	72572	Spats2	mm10_genes_introns	chr15:99139518
chr4	44558754	44558754	1	*	61.39591685410719	chr4	44537507	44570001	32495	-	intron:158415	ENSMUST00000014174.13	18507	Pax5	mm10_genes_introns	chr4:44558754
chr10	75643332	75643332	1	*	-48.174349353968594	chr10	75642671	75643873	1203	-	intron:410538	ENSMUST00000095541.10	71733	Susd2	mm10_genes_introns	chr10:75643332
chr11	115803559	115803559	1	*	-40.79455365005191	chr11	115801882	115805881	4000	-	1to5kb:92877	ENSMUST00000125658.1	140721	Caskin2	mm10_genes_1to5kb	chr11:115803559
chr9	56324921	56324921	1	*	49.900764225095465	chr9	56318821	56374375	55555	-	intron:375044	ENSMUST00000061552.14	244895	Peak1	mm10_genes_introns	chr9:56324921
chr17	88662277	88662277	1	*	-45.9143990123888	chr17	88662205	88662586	382	+	exon:736124	ENSMUST00000150023.1	77057	Ston1	mm10_genes_exons	chr17:88662277
chr11	67084391	67084391	1	*	48.91262871151301	chr11	67084168	67084794	627	+	intron:427039	ENSMUST00000108689.7	17883	Myh3	mm10_genes_introns	chr11:67084391
chr12	5143280	5143280	1	*	39.138217681128005	chr12	5140709	5209931	69223	-	intron:483829	ENSMUST00000020958.8	208439	Klhl29	mm10_genes_introns	chr12:5143280
chr2	32534132	32534132	1	*	-53.20020178921043	chr2	32530332	32534331	4000	+	1to5kb:9903	ENSMUST00000136816.7	98952	Fam102a	mm10_genes_1to5kb	chr2:32534132
chr7	29068581	29068581	1	*	-39.31297662427505	chr7	29068570	29068644	75	-	exon:350050	ENSMUST00000214374.1	20190	Ryr1	mm10_genes_exons	chr7:29068581
chr5	122653319	122653319	1	*	43.73869678581401	chr5	122652896	122654160	1265	+	intron:193097	ENSMUST00000100737.9	18439	P2rx7	mm10_genes_introns	chr5:122653319
chr8	125747980	125747980	1	*	49.58615488562747	chr8	125747698	125748034	337	+	exon:398140	ENSMUST00000138656.1	66566	Ntpcr	mm10_genes_exons	chr8:125747980
chr17	46460937	46460937	1	*	-57.557472138780355	chr17	46454134	46461032	6899	-	exon:750834	ENSMUST00000225808.1	106763	Ttbk1	mm10_genes_exons	chr17:46460937
chr8	91603983	91603983	1	*	45.22444604047104	chr8	91522897	91666281	143385	+	intron:325057	ENSMUST00000069718.14	26383	Fto	mm10_genes_introns	chr8:91603983
chr17	46511422	46511422	1	*	42.170735155446046	chr17	46511331	46511438	108	-	intron:624875	ENSMUST00000066026.7	78309	Cul9	mm10_genes_introns	chr17:46511422
chr8	9334058	9334058	1	*	47.30194607936953	chr8	9233106	9770076	536971	-	intron:332287	ENSMUST00000110969.4	270028	Fam155a	mm10_genes_introns	chr8:9334058
chr3	130303903	130303903	1	*	-59.13507792101038	chr3	130182835	130386874	204040	+	intron:117261	ENSMUST00000143830.2	77018	Col25a1	mm10_genes_introns	chr3:130303903
chr14	77588236	77588236	1	*	45.715740802271654	chr14	77582630	77592779	10150	+	intron:527841	ENSMUST00000022589.8	239188	Enox1	mm10_genes_introns	chr14:77588236
chr4	117281378	117281378	1	*	-52.40845545448898	chr4	117278104	117285378	7275	-	intron:165239	ENSMUST00000030439.14	66743	Rnf220	mm10_genes_introns	chr4:117281378
chr13	51171794	51171794	1	*	44.11751574847207	chr13	51171625	51174624	3000	+	intron:497295	ENSMUST00000021828.5	75124	Nxnl2	mm10_genes_introns	chr13:51171794
chr12	16541721	16541721	1	*	-57.695110825707815	chr12	16541714	16541828	115	-	exon:580427	ENSMUST00000067124.5	14245	Lpin1	mm10_genes_exons	chr12:16541721
chrX	10216238	10216238	1	*	43.40512719824528	chrX	10216216	10216453	238	-	5UTR:93287	ENSMUST00000115534.7	19893	Rpgr	mm10_genes_5UTRs	chrX:10216238
chr15	78405381	78405381	1	*	47.49150924303419	chr15	78401416	78405415	4000	+	1to5kb:111539	ENSMUST00000229791.1	246221	Mpst	mm10_genes_1to5kb	chr15:78405381
chr4	57681757	57681757	1	*	-46.462407791697245	chr4	57648121	57688415	40295	+	intron:139835	ENSMUST00000098066.8	677884	Pakap	mm10_genes_introns	chr4:57681757
chr6	99502146	99502146	1	*	-41.35647590116848	chr6	99435346	99520600	85255	-	intron:250375	ENSMUST00000176565.7	108655	Foxp1	mm10_genes_introns	chr6:99502146
chr14	121238595	121238595	1	*	-47.312934629916676	chr14	121237232	121238627	1396	+	intron:528962	ENSMUST00000026635.7	223254	Farp1	mm10_genes_introns	chr14:121238595
chr5	115522137	115522137	1	*	48.752364036003314	chr5	115506869	115544342	37474	+	intron:190981	ENSMUST00000067268.14	19303	Pxn	mm10_genes_introns	chr5:115522137
chr3	25570996	25570996	1	*	-52.20876783820677	chr3	25440078	25912641	472564	-	intron:120917	ENSMUST00000193603.5	192167	Nlgn1	mm10_genes_introns	chr3:25570996
chr15	98861759	98861759	1	*	-54.50990620612656	chr15	98861602	98862683	1082	-	exon:684108	ENSMUST00000178486.8	381022	Kmt2d	mm10_genes_exons	chr15:98861759
chr17	29853362	29853362	1	*	-64.81317926059096	chr17	29851542	29855541	4000	-	1to5kb:124836	ENSMUST00000234114.1	74762	Mdga1	mm10_genes_1to5kb	chr17:29853362
chr19	46766673	46766673	1	*	56.71997428842612	chr19	46763394	46853900	90507	+	intron:656871	ENSMUST00000099373.11	94219	Cnnm2	mm10_genes_introns	chr19:46766673
chr5	116179462	116179462	1	*	-66.23436821324913	chr5	116172550	116180803	8254	-	intron:213869	ENSMUST00000050178.12	269693	Ccdc60	mm10_genes_introns	chr5:116179462
chr7	45815722	45815722	1	*	47.29652784158326	chr7	45815312	45819311	4000	-	1to5kb:59708	ENSMUST00000107729.9	19158	Cyth2	mm10_genes_1to5kb	chr7:45815722
chr10	8359131	8359131	1	*	48.952209060174425	chr10	8330224	8390887	60664	-	intron:404482	ENSMUST00000061601.8	338362	Ust	mm10_genes_introns	chr10:8359131
chr9	56880871	56880871	1	*	-50.94656743952777	chr9	56865278	56883556	18279	+	intron:352705	ENSMUST00000214057.1	121021	Cspg4	mm10_genes_introns	chr9:56880871
chrX	107677071	107677071	1	*	-41.94303878875844	chrX	107673963	107677962	4000	+	1to5kb:136614	ENSMUST00000068451.11	245572	Tbx22	mm10_genes_1to5kb	chrX:107677071
chr18	73697142	73697142	1	*	70.30633721858534	chr18	73678040	73703429	25390	-	intron:646484	ENSMUST00000025393.13	17128	Smad4	mm10_genes_introns	chr18:73697142
chr1	86770521	86770521	1	*	-45.67440882543407	chr1	86760390	86791415	31026	+	intron:9745	ENSMUST00000168237.7	208718	Dis3l2	mm10_genes_introns	chr1:86770521
chr1	90971242	90971242	1	*	46.820412876307195	chr1	90970662	90974661	4000	-	1to5kb:6145	ENSMUST00000027529.11	19329	Rab17	mm10_genes_1to5kb	chr1:90971242
chr5	116501741	116501741	1	*	-49.7855341291773	chr5	116482537	116591333	108797	-	intron:213899	ENSMUST00000076124.6	68955	Srrm4	mm10_genes_introns	chr5:116501741
chr4	55078586	55078586	1	*	39.25494721061613	chr4	55073106	55079263	6158	+	intron:139758	ENSMUST00000098070.9	242466	Zfp462	mm10_genes_introns	chr4:55078586
chr7	139646354	139646354	1	*	-58.12317708338257	chr7	139646279	139646441	163	-	exon:373617	ENSMUST00000129990.8	212124	Cfap46	mm10_genes_exons	chr7:139646354
chr2	152952347	152952347	1	*	-42.3636782768519	chr2	152951457	152952456	1000	-	promoter:18451	ENSMUST00000123121.8	252864	Dusp15	mm10_genes_promoters	chr2:152952347
chr3	54759426	54759426	1	*	-47.4451905906586	chr3	54755695	54782154	26460	+	intron:107151	ENSMUST00000029371.2	55994	Smad9	mm10_genes_introns	chr3:54759426
chr3	130144925	130144925	1	*	-34.78653481479132	chr3	130144794	130145255	462	+	intron:117256	ENSMUST00000197950.1	77018	Col25a1	mm10_genes_introns	chr3:130144925
chr3	101419621	101419621	1	*	-47.79319256536695	chr3	101378493	101425450	46958	+	intron:114071	ENSMUST00000043983.10	78908	Igsf3	mm10_genes_introns	chr3:101419621
chr6	31277868	31277868	1	*	-51.069215367732745	chr6	31277848	31277955	108	+	exon:269176	ENSMUST00000144612.7	73652	2210408F21Rik	mm10_genes_exons	chr6:31277868
chr15	86060798	86060798	1	*	-53.47860096168936	chr15	86057832	86091312	33481	+	intron:552574	ENSMUST00000088931.9	223752	Gramd4	mm10_genes_introns	chr15:86060798
chr15	84398057	84398057	1	*	46.89069982953372	chr15	84384393	84406445	22053	-	intron:565939	ENSMUST00000080751.8	72301	Shisal1	mm10_genes_introns	chr15:84398057
chr4	134057154	134057154	1	*	44.9674742720011	chr4	134055815	134059814	4000	+	1to5kb:29279	ENSMUST00000219402.2	230806	Crybg2	mm10_genes_1to5kb	chr4:134057154
chr4	102806724	102806724	1	*	-44.662355295478676	chr4	102760566	102852882	92317	+	intron:142748	ENSMUST00000097948.8	73094	Sgip1	mm10_genes_introns	chr4:102806724
chr6	72768940	72768940	1	*	-40.4955118832383	chr6	72649204	72788210	139007	-	intron:247255	ENSMUST00000069536.11	21415	Tcf7l1	mm10_genes_introns	chr6:72768940
chr5	124899255	124899255	1	*	-57.407293818605886	chr5	124884773	124901261	16489	+	intron:194246	ENSMUST00000141533.7	269704	Zfp664	mm10_genes_introns	chr5:124899255
chr10	7868004	7868004	1	*	-68.17082668725531	chr10	7867264	7870396	3133	+	exon:465981	ENSMUST00000039484.5	237256	Zc3h12d	mm10_genes_exons	chr10:7868004
chr13	40287616	40287616	1	*	-45.73516055075659	chr13	40280914	40287971	7058	-	intron:506494	ENSMUST00000054635.7	218165	Ofcc1	mm10_genes_introns	chr13:40287616
chr19	42024242	42024242	1	*	-54.34161632187484	chr19	41982009	42031888	49880	+	intron:655593	ENSMUST00000026170.2	226122	Ubtd1	mm10_genes_introns	chr19:42024242
chr5	131222961	131222961	1	*	-54.53408058554614	chr5	131151070	131306362	155293	-	intron:217504	ENSMUST00000086023.11	212996	Galnt17	mm10_genes_introns	chr5:131222961
chr12	41703674	41703674	1	*	47.154587873930744	chr12	41703655	41703757	103	+	exon:567354	ENSMUST00000132121.7	93757	Immp2l	mm10_genes_exons	chr12:41703674
chr4	138144288	138144288	1	*	60.45245830123086	chr4	138126635	138146284	19650	+	intron:150820	ENSMUST00000084215.11	230861	Eif4g3	mm10_genes_introns	chr4:138144288
chrX	104201035	104201035	1	*	-39.44369744859206	chrX	104200633	104201185	553	-	5UTR:94181	ENSMUST00000118314.7	245555	Nexmif	mm10_genes_5UTRs	chrX:104201035
chr10	62127603	62127603	1	*	40.42830258497568	chr10	62109124	62134488	25365	-	intron:409531	ENSMUST00000027719.11	69894	Fam241b	mm10_genes_introns	chr10:62127603
chr5	116563928	116563928	1	*	-52.77261391444685	chr5	116482537	116591333	108797	-	intron:213899	ENSMUST00000076124.6	68955	Srrm4	mm10_genes_introns	chr5:116563928
chr8	79295431	79295431	1	*	48.157267943509886	chr8	79294938	79295937	1000	-	promoter:68597	ENSMUST00000048718.3	109136	Mmaa	mm10_genes_promoters	chr8:79295431
chr2	163347366	163347366	1	*	63.84878695363	chr2	163341581	163375603	34023	-	intron:99902	ENSMUST00000017961.10	59091	Jph2	mm10_genes_introns	chr2:163347366
chr12	18514235	18514235	1	*	34.99648012756824	chr12	18513510	18514509	1000	+	promoter:93753	ENSMUST00000177778.8	236366	5730507C01Rik	mm10_genes_promoters	chr12:18514235
chrX	58030828	58030828	1	*	-53.91218805039091	chrX	58029999	58030998	1000	+	promoter:135756	ENSMUST00000088631.10	22773	Zic3	mm10_genes_promoters	chrX:58030828
chr18	61785527	61785527	1	*	-46.5563104363213	chr18	61758729	61786575	27847	-	intron:645110	ENSMUST00000154876.7	106877	Afap1l1	mm10_genes_introns	chr18:61785527
chr17	86591489	86591489	1	*	-52.29504782871805	chr17	86559306	86619891	60586	+	intron:612387	ENSMUST00000097275.8	18754	Prkce	mm10_genes_introns	chr17:86591489
chr14	46787081	46787081	1	*	-45.175509352779706	chr14	46784181	46788182	4002	-	intron:535718	ENSMUST00000015903.11	12793	Cnih1	mm10_genes_introns	chr14:46787081
chr2	55569348	55569348	1	*	-41.899873934420945	chr2	55447043	55594810	147768	+	intron:53122	ENSMUST00000067101.9	16519	Kcnj3	mm10_genes_introns	chr2:55569348
chr11	75907059	75907059	1	*	-36.422086957143705	chr11	75906648	75908910	2263	-	intron:456179	ENSMUST00000121287.7	380714	Rph3al	mm10_genes_introns	chr11:75907059
chr17	12271876	12271876	1	*	46.485230210018635	chr17	12270863	12272220	1358	-	exon:736786	ENSMUST00000233755.1	26407	Map3k4	mm10_genes_exons	chr17:12271876
chr1	149871445	149871445	1	*	-48.64576147240166	chr1	149871401	149871515	115	-	exon:44099	ENSMUST00000070200.14	18783	Pla2g4a	mm10_genes_exons	chr1:149871445
chr8	22474458	22474458	1	*	60.73779036044464	chr8	22471788	22475787	4000	+	1to5kb:64116	ENSMUST00000067786.8	20516	Slc20a2	mm10_genes_1to5kb	chr8:22474458
chr11	50682222	50682222	1	*	50.28598750502873	chr11	50668151	50737165	69015	+	intron:423919	ENSMUST00000142118.2	216725	Adamts2	mm10_genes_introns	chr11:50682222
chr10	70163546	70163546	1	*	-60.58219932852058	chr10	70154837	70167001	12165	+	intron:393655	ENSMUST00000147545.7	76551	Ccdc6	mm10_genes_introns	chr10:70163546
chrX	13846423	13846423	1	*	50.53539949053621	chrX	13846089	13847088	1000	-	promoter:137830	ENSMUST00000124710.1	12361	Cask	mm10_genes_promoters	chrX:13846423
chr1	154790700	154790700	1	*	-55.49922386337066	chr1	154700511	154863878	163368	-	intron:38118	ENSMUST00000211821.1	12290	Cacna1e	mm10_genes_introns	chr1:154790700
chr4	8836374	8836374	1	*	-53.418911852822795	chr4	8835322	8839321	4000	+	1to5kb:26565	ENSMUST00000130709.1	320790	Chd7	mm10_genes_1to5kb	chr4:8836374
chr4	137866248	137866248	1	*	-52.15793449722925	chr4	137862382	137905069	42688	+	intron:150754	ENSMUST00000102518.9	230857	Ece1	mm10_genes_introns	chr4:137866248
chr1	170577300	170577300	1	*	-52.801027222944775	chr1	170514687	170589259	74573	-	intron:40704	ENSMUST00000160456.7	70729	Nos1ap	mm10_genes_introns	chr1:170577300
chrX	139611288	139611288	1	*	46.181245954481035	chrX	139610367	139611366	1000	+	promoter:136999	ENSMUST00000113029.3	66889	Rnf128	mm10_genes_promoters	chrX:139611288
chr10	59103072	59103072	1	*	-44.27174185934467	chr10	59086917	59104171	17255	+	intron:391680	ENSMUST00000153031.1	237353	Sh3rf3	mm10_genes_introns	chr10:59103072
chrX	152769438	152769438	1	*	43.321788615295574	chrX	152769286	152769461	176	-	exon:833241	ENSMUST00000101141.8	110380	Shroom2	mm10_genes_exons	chrX:152769438
chrX	13464210	13464210	1	*	43.4778230934133	chrX	13461110	13465109	4000	+	1to5kb:135225	ENSMUST00000050434.5	236690	Nyx	mm10_genes_1to5kb	chrX:13464210
chrX	74368443	74368443	1	*	-57.40380884789722	chrX	74368416	74368673	258	-	exon:827380	ENSMUST00000155676.7	27643	Ubl4a	mm10_genes_exons	chrX:74368443
chr5	141617759	141617759	1	*	59.63677320460866	chr5	141613241	141792927	179687	+	intron:197166	ENSMUST00000085774.10	330222	Sdk1	mm10_genes_introns	chr5:141617759
chr4	149923443	149923443	1	*	-51.3205129925042	chr4	149922472	149923471	1000	-	promoter:33813	ENSMUST00000167342.1	74646	Spsb1	mm10_genes_promoters	chr4:149923443
chr6	28551859	28551859	1	*	-45.788140358935806	chr6	28545599	28626099	80501	+	intron:224507	ENSMUST00000164915.7	56463	Snd1	mm10_genes_introns	chr6:28551859
chr11	33783047	33783047	1	*	-50.23168060341882	chr11	33645816	33843129	197314	-	intron:448295	ENSMUST00000101368.8	70357	Kcnip1	mm10_genes_introns	chr11:33783047
chr8	119750041	119750041	1	*	-43.81915182299788	chr8	119750012	119751159	1148	+	intron:329575	ENSMUST00000095171.4	69047	Atp2c2	mm10_genes_introns	chr8:119750041
chr3	129575945	129575945	1	*	-42.165916834953975	chr3	129532769	129605040	72272	+	intron:117194	ENSMUST00000199910.4	170439	Elovl6	mm10_genes_introns	chr3:129575945
chr4	155212970	155212970	1	*	-56.338840178270665	chr4	155160957	155221551	60595	-	intron:175244	ENSMUST00000084103.9	20481	Ski	mm10_genes_introns	chr4:155212970
chr5	115533620	115533620	1	*	-70.52487955482867	chr5	115506869	115544342	37474	+	intron:190981	ENSMUST00000067268.14	19303	Pxn	mm10_genes_introns	chr5:115533620
chr13	99421868	99421868	1	*	-47.79168545269018	chr13	99421446	99425961	4516	-	exon:618001	ENSMUST00000064762.5	17755	Map1b	mm10_genes_exons	chr13:99421868
chr9	21748587	21748587	1	*	49.617230828475314	chr9	21748141	21749919	1779	+	exon:418618	ENSMUST00000034713.8	16835	Ldlr	mm10_genes_exons	chr9:21748587
chr4	141369703	141369703	1	*	52.553337431295155	chr4	141368325	141379677	11353	+	intron:152188	ENSMUST00000006380.4	277743	Fam131c	mm10_genes_introns	chr4:141369703
chr4	133250345	133250345	1	*	52.22590654884955	chr4	133249849	133250848	1000	+	promoter:29254	ENSMUST00000134895.1	53608	Map3k6	mm10_genes_promoters	chr4:133250345
chr16	90951907	90951907	1	*	-55.44771881050748	chr16	90951420	90955419	4000	-	1to5kb:119605	ENSMUST00000154276.7	104015	Synj1	mm10_genes_1to5kb	chr16:90951907
chr8	123835091	123835091	1	*	40.08190838159077	chr8	123834694	123835287	594	+	exon:397749	ENSMUST00000118535.7	19341	Rab4a	mm10_genes_exons	chr8:123835091
chr5	121889579	121889579	1	*	-44.3552069303934	chr5	121887489	121898276	10788	-	intron:214775	ENSMUST00000111752.9	13048	Cux2	mm10_genes_introns	chr5:121889579
chr17	80032128	80032128	1	*	-46.546693608377076	chr17	80030541	80032540	2000	-	intron:628939	ENSMUST00000184635.7	72692	Hnrnpll	mm10_genes_introns	chr17:80032128
chr11	6601845	6601845	1	*	-62.748347729300356	chr11	6600393	6604392	4000	-	1to5kb:89201	ENSMUST00000177050.7	192950	Nacad	mm10_genes_1to5kb	chr11:6601845
chr14	35157035	35157035	1	*	56.02563835604809	chr14	35026951	35251693	224743	+	intron:521600	ENSMUST00000043349.6	14803	Grid1	mm10_genes_introns	chr14:35157035
chr15	53901347	53901347	1	*	-40.80451080031718	chr15	53860283	53902368	42086	-	intron:558964	ENSMUST00000078673.13	320679	Samd12	mm10_genes_introns	chr15:53901347
chr9	119943966	119943966	1	*	46.79685837073693	chr9	119943817	119943974	158	+	exon:439579	ENSMUST00000035100.5	74052	Ttc21a	mm10_genes_exons	chr9:119943966
chr8	48541097	48541097	1	*	-48.39545864186384	chr8	48417246	48646257	229012	-	intron:336189	ENSMUST00000033965.13	23965	Tenm3	mm10_genes_introns	chr8:48541097
chr19	53698057	53698057	1	*	-36.73353133854505	chr19	53677593	53813247	135655	+	intron:657422	ENSMUST00000164202.8	73713	Rbm20	mm10_genes_introns	chr19:53698057
chr18	35990794	35990794	1	*	-39.15094621541043	chr18	35988239	36002923	14685	+	intron:633789	ENSMUST00000115716.8	74002	Psd2	mm10_genes_introns	chr18:35990794
chr13	45589749	45589749	1	*	52.259203816902996	chr13	45568581	45697820	129240	-	intron:506959	ENSMUST00000091628.10	20238	Atxn1	mm10_genes_introns	chr13:45589749
chr3	95676911	95676911	1	*	-41.11118328591925	chr3	95676201	95676969	769	-	exon:152852	ENSMUST00000117782.7	229595	Adamtsl4	mm10_genes_exons	chr3:95676911
chr7	27217127	27217127	1	*	50.44734681579233	chr7	27214053	27218052	4000	-	1to5kb:58395	ENSMUST00000147170.1	233011	Itpkc	mm10_genes_1to5kb	chr7:27217127
chr6	118088746	118088746	1	*	-48.49655822991522	chr6	118088301	118089102	802	+	intron:236772	ENSMUST00000164960.3	70727	Rasgef1a	mm10_genes_introns	chr6:118088746
chr4	15970289	15970289	1	*	-51.61859067662113	chr4	15969459	15970720	1262	+	intron:135943	ENSMUST00000029879.14	27354	Nbn	mm10_genes_introns	chr4:15970289
chr18	36930321	36930321	1	*	57.83306907917236	chr18	36930184	36932672	2489	+	exon:762162	ENSMUST00000193839.5	116731	Pcdha1	mm10_genes_exons	chr18:36930321
chr15	91731497	91731497	1	*	-46.799053413216086	chr15	91731465	91731653	189	+	exon:665415	ENSMUST00000060642.6	66725	Lrrk2	mm10_genes_exons	chr15:91731497
chr6	73440221	73440221	1	*	-36.61970559442109	chr6	73440183	73440248	66	-	exon:296354	ENSMUST00000204961.1	73408	1700065L07Rik	mm10_genes_exons	chr6:73440221
chrX	13845597	13845597	1	*	-44.171664726560664	chrX	13786050	13846007	59958	-	intron:684751	ENSMUST00000115436.8	12361	Cask	mm10_genes_introns	chrX:13845597
chr13	94263376	94263376	1	*	-59.24845984857502	chr13	94253071	94285219	32149	-	intron:512968	ENSMUST00000022197.14	107767	Scamp1	mm10_genes_introns	chr13:94263376
chr14	54417481	54417481	1	*	48.1951032170782	chr14	54415015	54419014	4000	-	1to5kb:108969	ENSMUST00000227334.1	20540	Slc7a7	mm10_genes_1to5kb	chr14:54417481
chrX	106485457	106485457	1	*	50.682821466430774	chrX	106485275	106486274	1000	-	promoter:139242	ENSMUST00000039447.13	333564	Fndc3c1	mm10_genes_promoters	chrX:106485457
chr6	93211275	93211275	1	*	36.08738753888174	chr6	93192204	93237973	45770	+	intron:234122	ENSMUST00000204449.2	330385	9530026P05Rik	mm10_genes_introns	chr6:93211275
chr13	52847623	52847623	1	*	-55.61959301777757	chr13	52841065	52887240	46176	-	intron:507815	ENSMUST00000137064.7	11992	Auh	mm10_genes_introns	chr13:52847623
chr9	45745206	45745206	1	*	44.710765276021924	chr9	45744970	45745257	288	+	exon:422545	ENSMUST00000034592.9	114873	Dscaml1	mm10_genes_exons	chr9:45745206
chr2	134527700	134527700	1	*	-47.21895774713113	chr2	134523161	134530541	7381	-	intron:96782	ENSMUST00000028704.2	15112	Hao1	mm10_genes_introns	chr2:134527700
chr17	70846559	70846559	1	*	48.935258919850874	chr17	70846327	70847326	1000	-	promoter:126542	ENSMUST00000156484.1	21815	Tgif1	mm10_genes_promoters	chr17:70846559
chr17	24334035	24334035	1	*	46.69367760359456	chr17	24333910	24334291	382	-	exon:739275	ENSMUST00000234232.1	381072	Abca17	mm10_genes_exons	chr17:24334035
chrX	48513332	48513332	1	*	36.29505759225734	chrX	48513236	48513426	191	-	exon:824437	ENSMUST00000143466.7	26926	Aifm1	mm10_genes_exons	chrX:48513332
chr5	112971061	112971061	1	*	48.699965146285166	chr5	112969270	112973506	4237	-	intron:212809	ENSMUST00000065167.8	320129	Grk3	mm10_genes_introns	chr5:112971061
chr6	87912370	87912370	1	*	-52.82801177868761	chr6	87908935	87912934	4000	+	1to5kb:45464	ENSMUST00000032141.13	232210	Hmces	mm10_genes_1to5kb	chr6:87912370
chr14	59230746	59230746	1	*	47.16228648632815	chr14	59230541	59235218	4678	+	intron:525963	ENSMUST00000043227.12	71330	Rcbtb1	mm10_genes_introns	chr14:59230746
chr5	143287818	143287818	1	*	47.562341603989026	chr5	143287038	143289778	2741	-	exon:264431	ENSMUST00000212355.1	330230	Zfp853	mm10_genes_exons	chr5:143287818
chr12	83772134	83772134	1	*	44.09490368003893	chr12	83772122	83772224	103	+	exon:572513	ENSMUST00000121733.7	170721	Papln	mm10_genes_exons	chr12:83772134
chr5	65379357	65379357	1	*	-42.82390948729311	chr5	65378928	65380071	1144	+	exon:219771	ENSMUST00000031096.10	83379	Klb	mm10_genes_exons	chr5:65379357
chr10	81364786	81364786	1	*	54.989637741561914	chr10	81363770	81366225	2456	+	exon:477883	ENSMUST00000044844.8	73822	Mfsd12	mm10_genes_exons	chr10:81364786
chr12	76670676	76670676	1	*	-42.31001823804943	chr12	76649979	76709934	59956	-	intron:488390	ENSMUST00000021458.12	20741	Sptb	mm10_genes_introns	chr12:76670676
chr8	23174435	23174435	1	*	40.73835018522347	chr8	23171265	23174660	3396	-	exon:401073	ENSMUST00000167004.2	102247	Gpat4	mm10_genes_exons	chr8:23174435
chr9	103341604	103341604	1	*	-49.11279374456066	chr9	103338634	103342633	4000	+	1to5kb:72954	ENSMUST00000185305.1	235559	Topbp1	mm10_genes_1to5kb	chr9:103341604
chr5	5125506	5125506	1	*	39.77290890039183	chr5	5103855	5135318	31464	-	intron:199719	ENSMUST00000115451.7	18647	Cdk14	mm10_genes_introns	chr5:5125506
chr1	20935354	20935354	1	*	54.76053808885102	chr1	20934582	20939650	5069	+	exon:1571	ENSMUST00000189400.6	74229	Paqr8	mm10_genes_exons	chr1:20935354
chr4	133880488	133880488	1	*	38.20737468051802	chr4	133872004	133880916	8913	-	intron:169932	ENSMUST00000105894.10	20111	Rps6ka1	mm10_genes_introns	chr4:133880488
chr2	156730906	156730906	1	*	-48.27245507784589	chr2	156711262	156745834	34573	+	intron:67675	ENSMUST00000109567.9	228836	Dlgap4	mm10_genes_introns	chr2:156730906
chr14	99176672	99176672	1	*	-41.4717835102287	chr14	99176571	99176684	114	+	exon:635443	ENSMUST00000226935.1	52023	Pibf1	mm10_genes_exons	chr14:99176672
chr2	52651530	52651530	1	*	63.41921419654294	chr2	52477812	52675727	197916	-	intron:81762	ENSMUST00000178799.7	12298	Cacnb4	mm10_genes_introns	chr2:52651530
chr1	56955382	56955382	1	*	-46.601803355981374	chr1	56899118	56969652	70535	-	intron:26785	ENSMUST00000042857.13	212712	Satb2	mm10_genes_introns	chr1:56955382
chr3	69515939	69515939	1	*	41.88075593937809	chr3	69497946	69549325	51380	+	intron:108473	ENSMUST00000029355.8	242083	Ppm1l	mm10_genes_introns	chr3:69515939
chr16	97611716	97611716	1	*	-54.424921067050434	chr16	97611196	97612195	1000	-	promoter:119883	ENSMUST00000000395.7	50528	Tmprss2	mm10_genes_promoters	chr16:97611716
chr14	54413732	54413732	1	*	-51.62371315862882	chr14	54410461	54414460	4000	-	1to5kb:108960	ENSMUST00000000984.8	20540	Slc7a7	mm10_genes_1to5kb	chr14:54413732
chr12	83427736	83427736	1	*	-48.530942405303406	chr12	83370665	83487676	117012	-	intron:488957	ENSMUST00000178756.7	70127	Dpf3	mm10_genes_introns	chr12:83427736
chr11	95669326	95669326	1	*	42.789958118485984	chr11	95666450	95670449	4000	+	1to5kb:87556	ENSMUST00000123001.1	18673	Phb	mm10_genes_1to5kb	chr11:95669326
chr5	53711908	53711908	1	*	51.677805250381795	chr5	53708254	53712253	4000	-	1to5kb:39959	ENSMUST00000200691.3	12425	Cckar	mm10_genes_1to5kb	chr5:53711908
chr2	167350169	167350169	1	*	-55.1319100628526	chr2	167349184	167350183	1000	-	promoter:19066	ENSMUST00000109221.8	56336	B4galt5	mm10_genes_promoters	chr2:167350169
chr19	28641198	28641198	1	*	57.06822845347595	chr19	28540409	28665752	125344	-	intron:665028	ENSMUST00000162022.7	226075	Glis3	mm10_genes_introns	chr19:28641198
chr6	22004040	22004040	1	*	-39.770214087178246	chr6	21987060	22016902	29843	+	intron:224271	ENSMUST00000115383.8	214642	Cped1	mm10_genes_introns	chr6:22004040
chr19	3533424	3533424	1	*	53.75319788368036	chr19	3526935	3544107	17173	-	intron:658537	ENSMUST00000025846.15	52036	Ppp6r3	mm10_genes_introns	chr19:3533424
chr17	49030510	49030510	1	*	46.57738193291737	chr17	48932819	49069868	137050	+	intron:608155	ENSMUST00000046254.2	70530	Lrfn2	mm10_genes_introns	chr17:49030510
chr2	27954979	27954979	1	*	48.987411141451574	chr2	27953026	27958221	5196	+	intron:48075	ENSMUST00000028280.13	12831	Col5a1	mm10_genes_introns	chr2:27954979
chrX	159988605	159988605	1	*	57.75567115801215	chrX	159988433	159988805	373	+	exon:819780	ENSMUST00000033665.8	270672	Map3k15	mm10_genes_exons	chrX:159988605
chr9	66125463	66125463	1	*	-43.797662640102565	chr9	66124887	66125886	1000	-	promoter:76132	ENSMUST00000034946.14	56440	Snx1	mm10_genes_promoters	chr9:66125463
chr10	110421419	110421419	1	*	49.433303091644234	chr10	110317022	110455649	138628	-	intron:416806	ENSMUST00000160159.2	260315	Nav3	mm10_genes_introns	chr10:110421419
chr15	98628914	98628914	1	*	-35.29196020634719	chr15	98625840	98629839	4000	+	1to5kb:112298	ENSMUST00000229223.1	12297	Cacnb3	mm10_genes_1to5kb	chr15:98628914
chr2	143725281	143725281	1	*	-48.26741151526296	chr2	143696695	143749124	52430	+	intron:64776	ENSMUST00000028905.9	18549	Pcsk2	mm10_genes_introns	chr2:143725281
chr17	43821946	43821946	1	*	-45.73448033192113	chr17	43801667	43836270	34604	+	intron:607086	ENSMUST00000228972.1	53901	Rcan2	mm10_genes_introns	chr17:43821946
chr8	70166066	70166066	1	*	47.2472731996204	chr8	70166046	70166175	130	+	exon:385339	ENSMUST00000110143.7	17259	Mef2b	mm10_genes_exons	chr8:70166066
chr14	120335470	120335470	1	*	-48.810003514813246	chr14	120325413	120379149	53737	+	intron:528837	ENSMUST00000088419.12	105559	Mbnl2	mm10_genes_introns	chr14:120335470
chr11	60366606	60366606	1	*	-43.68470821145327	chr11	60365033	60370468	5436	+	intron:425970	ENSMUST00000070805.12	74665	Drc3	mm10_genes_introns	chr11:60366606
chr5	135353318	135353318	1	*	-51.91350064564622	chr5	135351015	135355014	4000	-	1to5kb:42330	ENSMUST00000201791.3	94244	Fkbp6	mm10_genes_1to5kb	chr5:135353318
chr4	126166777	126166777	1	*	-50.18719250585004	chr4	126163627	126167626	4000	-	1to5kb:32674	ENSMUST00000094760.8	66938	Sh3d21	mm10_genes_1to5kb	chr4:126166777
chr15	71846188	71846188	1	*	43.45339867924126	chr15	71846170	71846223	54	-	exon:674205	ENSMUST00000229585.1	69700	Col22a1	mm10_genes_exons	chr15:71846188
chr5	52534589	52534589	1	*	51.67091101335293	chr5	52533517	52538780	5264	-	exon:245644	ENSMUST00000199942.4	246316	Lgi2	mm10_genes_exons	chr5:52534589
chrX	99136675	99136675	1	*	46.864285011969145	chrX	99133131	99137130	4000	+	1to5kb:136363	ENSMUST00000151750.1	13641	Efnb1	mm10_genes_1to5kb	chrX:99136675
chr1	152085263	152085263	1	*	-66.84715350747517	chr1	152006768	152089931	83164	-	intron:37478	ENSMUST00000187603.6	69399	1700025G04Rik	mm10_genes_introns	chr1:152085263
chr11	34253229	34253229	1	*	-69.49064783374791	chr11	34249839	34254330	4492	-	intron:448350	ENSMUST00000093193.11	94176	Dock2	mm10_genes_introns	chr11:34253229
chr7	79858430	79858430	1	*	52.90218602384162	chr7	79842661	79860918	18258	-	intron:300000	ENSMUST00000206235.1	16790	Anpep	mm10_genes_introns	chr7:79858430
chr9	63984928	63984928	1	*	-35.6743968651367	chr9	63954057	64007530	53474	-	intron:376505	ENSMUST00000041029.5	17130	Smad6	mm10_genes_introns	chr9:63984928
chr4	32264973	32264973	1	*	60.9852679375422	chr4	32239090	32317197	78108	+	intron:136645	ENSMUST00000108180.8	12014	Bach2	mm10_genes_introns	chr4:32264973
chr16	34848107	34848107	1	*	-44.090792815997574	chr16	34815603	34860563	44961	+	intron:578277	ENSMUST00000155268.1	107589	Mylk	mm10_genes_introns	chr16:34848107
chr4	49652103	49652103	1	*	43.00975612868424	chr4	49651549	49652521	973	+	intron:139379	ENSMUST00000167496.7	109331	Rnf20	mm10_genes_introns	chr4:49652103
chrX	101273889	101273889	1	*	43.860593519305134	chrX	101273030	101274029	1000	+	promoter:136424	ENSMUST00000117706.7	59024	Med12	mm10_genes_promoters	chrX:101273889
chr6	76888021	76888021	1	*	-64.36397050584866	chr6	76882838	76902286	19449	-	intron:247559	ENSMUST00000160894.7	12386	Ctnna2	mm10_genes_introns	chr6:76888021
chr8	33516987	33516987	1	*	36.21973720328533	chr8	33516324	33517323	1000	+	promoter:64366	ENSMUST00000124501.1	104271	Tex15	mm10_genes_promoters	chr8:33516987
chr5	117838770	117838770	1	*	-41.869281204564224	chr5	117836850	117840849	4000	+	1to5kb:37164	ENSMUST00000142742.8	18125	Nos1	mm10_genes_1to5kb	chr5:117838770
chr2	11680612	11680612	1	*	-33.316585240135844	chr2	11680426	11681930	1505	+	intron:44940	ENSMUST00000028111.5	16184	Il2ra	mm10_genes_introns	chr2:11680612
chr19	6847714	6847714	1	*	64.39024506650034	chr19	6847636	6847734	99	-	exon:795017	ENSMUST00000236028.1	78317	Ccdc88b	mm10_genes_exons	chr19:6847714
chr6	28707053	28707053	1	*	-61.74546839253669	chr6	28707034	28707144	111	+	exon:267995	ENSMUST00000164915.7	56463	Snd1	mm10_genes_exons	chr6:28707053
chr8	23248263	23248263	1	*	-38.867148157862395	chr8	23246179	23250178	4000	-	1to5kb:67435	ENSMUST00000135646.1	57437	Golga7	mm10_genes_1to5kb	chr8:23248263
chr1	38483514	38483514	1	*	36.33698586691886	chr1	38406544	38534905	128362	-	intron:25170	ENSMUST00000095027.8	16764	Aff3	mm10_genes_introns	chr1:38483514
chr12	105374642	105374642	1	*	-70.31934025189246	chr12	105337560	105381344	43785	+	intron:480329	ENSMUST00000180458.8	69952	Tunar	mm10_genes_introns	chr12:105374642
chr6	119414564	119414564	1	*	-52.832726453630485	chr6	119370409	119417419	47011	-	intron:253060	ENSMUST00000032272.12	68465	Adipor2	mm10_genes_introns	chr6:119414564
chr6	128571664	128571664	1	*	44.43786981953073	chr6	128570922	128571965	1044	-	intron:255571	ENSMUST00000060574.8	232400	A2ml1	mm10_genes_introns	chr6:128571664
chr6	120960122	120960122	1	*	49.57916150560031	chr6	120959636	120963635	4000	-	1to5kb:49953	ENSMUST00000151602.3	194401	Mical3	mm10_genes_1to5kb	chr6:120960122
chr12	100485665	100485665	1	*	50.75692480063125	chr12	100466311	100495271	28961	-	intron:490702	ENSMUST00000062957.7	104718	Ttc7b	mm10_genes_introns	chr12:100485665
chr11	75657544	75657544	1	*	-51.2888257502977	chr11	75656733	75660732	4000	+	1to5kb:86797	ENSMUST00000148659.7	17913	Myo1c	mm10_genes_1to5kb	chr11:75657544
chr15	79789799	79789799	1	*	-45.04092279422607	chr15	79786351	79789916	3566	-	exon:678898	ENSMUST00000023057.9	73340	Nptxr	mm10_genes_exons	chr15:79789799
chr13	45874727	45874727	1	*	59.26719825654789	chr13	45873289	45877288	4000	-	1to5kb:102482	ENSMUST00000222610.1	20238	Atxn1	mm10_genes_1to5kb	chr13:45874727
chr2	131063605	131063605	1	*	46.5247279446474	chr2	131063570	131064569	1000	-	promoter:18041	ENSMUST00000132436.7	110751	Adam33	mm10_genes_promoters	chr2:131063605
chr9	53670300	53670300	1	*	51.511617469780255	chr9	53670015	53671014	1000	-	promoter:75662	ENSMUST00000120122.7	75717	Cul5	mm10_genes_promoters	chr9:53670300
chr5	65883979	65883979	1	*	49.47427975689366	chr5	65863151	65891552	28402	+	intron:184261	ENSMUST00000031106.7	74734	Rhoh	mm10_genes_introns	chr5:65883979
chr4	150093720	150093720	1	*	-39.16743372178963	chr4	150088137	150098757	10621	+	intron:153078	ENSMUST00000094451.3	269604	Gpr157	mm10_genes_introns	chr4:150093720
chr11	118503699	118503699	1	*	50.91889828290546	chr11	118502935	118503719	785	-	intron:467726	ENSMUST00000117731.7	52897	Rbfox3	mm10_genes_introns	chr11:118503699
chr16	26528686	26528686	1	*	-63.0040036634953	chr16	26527770	26531769	4000	-	1to5kb:118552	ENSMUST00000231658.1	100043057	Tmem207	mm10_genes_1to5kb	chr16:26528686
chr7	138393921	138393921	1	*	45.63253009326155	chr7	138361879	138394116	32238	-	intron:310480	ENSMUST00000160436.1	70571	Tcerg1l	mm10_genes_introns	chr7:138393921
chr13	48251839	48251839	1	*	45.54927938106766	chr13	48046609	48261919	215311	-	intron:507216	ENSMUST00000180921.1	320614	A330033J07Rik	mm10_genes_introns	chr13:48251839
chr7	130453811	130453811	1	*	-53.906495031875764	chr7	130418569	130464130	45562	-	intron:309750	ENSMUST00000035458.14	11907	Ate1	mm10_genes_introns	chr7:130453811
chr11	100321897	100321897	1	*	-55.65576969518886	chr11	100321317	100322096	780	+	exon:525694	ENSMUST00000049385.13	20918	Eif1	mm10_genes_exons	chr11:100321897
chr11	80508804	80508804	1	*	-42.33554879203682	chr11	80508556	80509106	551	-	exon:548625	ENSMUST00000133400.1	77417	C030013C21Rik	mm10_genes_exons	chr11:80508804
chr11	113742315	113742315	1	*	-45.887955044016614	chr11	113740323	113744322	4000	-	1to5kb:92738	ENSMUST00000131488.1	56699	Cdc42ep4	mm10_genes_1to5kb	chr11:113742315
chrX	36743962	36743962	1	*	-39.22163391658876	chrX	36743659	36744018	360	+	exon:809200	ENSMUST00000047655.6	194744	Slc25a43	mm10_genes_exons	chrX:36743962
chr19	41088753	41088753	1	*	-43.19864015689568	chr19	41088673	41088886	214	-	exon:801371	ENSMUST00000025986.14	24087	Tll2	mm10_genes_exons	chr19:41088753
chr1	172342729	172342729	1	*	45.60687327987617	chr1	172341452	172368920	27469	+	intron:19182	ENSMUST00000056136.3	16513	Kcnj10	mm10_genes_introns	chr1:172342729
chr6	72410053	72410053	1	*	-41.71093585711463	chr6	72409308	72413307	4000	+	1to5kb:44984	ENSMUST00000065906.8	56316	Ggcx	mm10_genes_1to5kb	chr6:72410053
chr16	5241345	5241345	1	*	45.74969349953981	chr16	5241286	5241396	111	+	exon:687174	ENSMUST00000100196.8	208211	Alg1	mm10_genes_exons	chr16:5241345
chr9	107657045	107657045	1	*	-43.917272318985276	chr9	107656643	107657642	1000	-	promoter:77353	ENSMUST00000195739.1	76257	Slc38a3	mm10_genes_promoters	chr9:107657045
chrX	68679038	68679038	1	*	-47.955030216947684	chrX	68678868	68688281	9414	+	intron:675287	ENSMUST00000088546.11	14265	Fmr1	mm10_genes_introns	chrX:68679038
chr3	127744817	127744817	1	*	-57.42841032954556	chr3	127729502	127780160	50659	-	intron:132427	ENSMUST00000029662.11	71481	Alpk1	mm10_genes_introns	chr3:127744817
chr18	78283872	78283872	1	*	-51.82881242812458	chr18	78209106	78326348	117243	-	intron:646831	ENSMUST00000237674.1	27411	Slc14a2	mm10_genes_introns	chr18:78283872
chrX	60548082	60548082	1	*	-32.50671667180217	chrX	60321554	60592529	270976	-	intron:687170	ENSMUST00000154051.7	320940	Atp11c	mm10_genes_introns	chrX:60548082
chr9	21181721	21181721	1	*	-47.33997433056255	chr9	21179101	21183100	4000	+	1to5kb:70388	ENSMUST00000140440.1	18577	Pde4a	mm10_genes_1to5kb	chr9:21181721
chr11	83900480	83900480	1	*	-41.63007756933717	chr11	83896341	83904910	8570	+	intron:434579	ENSMUST00000021016.9	21410	Hnf1b	mm10_genes_introns	chr11:83900480
chr10	80313254	80313254	1	*	-51.32963990180151	chr10	80311033	80318263	7231	+	exon:476749	ENSMUST00000105359.7	23805	Apc2	mm10_genes_exons	chr10:80313254
chr11	107631223	107631223	1	*	-43.748783854200276	chr11	107629501	107633500	4000	+	1to5kb:88280	ENSMUST00000143634.1	78455	Helz	mm10_genes_1to5kb	chr11:107631223
chr11	94971891	94971891	1	*	-36.8519110049117	chr11	94971677	94975676	4000	-	1to5kb:91717	ENSMUST00000139855.7	20391	Sgca	mm10_genes_1to5kb	chr11:94971891
chr5	105483823	105483823	1	*	55.34169242613957	chr5	105481929	105485802	3874	+	intron:188444	ENSMUST00000112707.2	433926	Lrrc8b	mm10_genes_introns	chr5:105483823
chr1	93082370	93082370	1	*	-51.88514013247355	chr1	93082316	93082480	165	-	exon:38418	ENSMUST00000171796.7	16560	Kif1a	mm10_genes_exons	chr1:93082370
chr5	25516713	25516713	1	*	46.69999080042064	chr5	25516067	25518027	1961	+	exon:213018	ENSMUST00000045016.8	242891	Cct8l1	mm10_genes_exons	chr5:25516713
chr15	58966945	58966945	1	*	-49.883247642427236	chr15	58964509	58968838	4330	-	intron:559473	ENSMUST00000080371.7	211401	Mtss1	mm10_genes_introns	chr15:58966945
chr5	115655892	115655892	1	*	-49.15404281022894	chr5	115653987	115657986	4000	-	1to5kb:41497	ENSMUST00000118576.7	75665	Bicdl1	mm10_genes_1to5kb	chr5:115655892
chr1	135545824	135545824	1	*	-44.678562911416805	chr1	135537300	135584554	47255	-	intron:36012	ENSMUST00000040599.14	215690	Nav1	mm10_genes_introns	chr1:135545824
chr15	28215540	28215540	1	*	-32.89133755230187	chr15	28204036	28219094	15059	+	intron:545690	ENSMUST00000067048.7	110082	Dnah5	mm10_genes_introns	chr15:28215540
chr11	85791948	85791948	1	*	-62.54905806094322	chr11	85791661	85793236	1576	-	exon:549451	ENSMUST00000140673.7	69909	2610027K06Rik	mm10_genes_exons	chr11:85791948
chr6	97402694	97402694	1	*	-45.50263659680254	chr6	97396278	97412487	16210	-	intron:250207	ENSMUST00000113355.8	232288	Frmd4b	mm10_genes_introns	chr6:97402694
chr9	57402608	57402608	1	*	-44.368049586126546	chr9	57398846	57420162	21317	-	intron:375178	ENSMUST00000215961.1	66812	Ppcdc	mm10_genes_introns	chr9:57402608
chr7	44462265	44462265	1	*	51.75215793268772	chr7	44460391	44464390	4000	+	1to5kb:53161	ENSMUST00000035929.10	68352	Aspdh	mm10_genes_1to5kb	chr7:44462265
chr5	112259263	112259263	1	*	-47.783526556004865	chr5	112259257	112259375	119	+	exon:226845	ENSMUST00000031286.12	12960	Crybb1	mm10_genes_exons	chr5:112259263
chr15	74588938	74588938	1	*	43.442512203102304	chr15	74588687	74589464	778	+	exon:659761	ENSMUST00000042035.15	107831	Adgrb1	mm10_genes_exons	chr15:74588938
chr9	69368086	69368086	1	*	-59.6448813406157	chr9	69364562	69371214	6653	+	intron:355717	ENSMUST00000034766.13	19883	Rora	mm10_genes_introns	chr9:69368086
chr11	117781391	117781391	1	*	42.15965219689089	chr11	117781076	117782075	1000	+	promoter:88672	ENSMUST00000127080.7	217356	Tmc8	mm10_genes_promoters	chr11:117781391
chr9	29243133	29243133	1	*	-44.96352868584212	chr9	29179255	29411555	232301	-	intron:370193	ENSMUST00000075069.10	235106	Ntm	mm10_genes_introns	chr9:29243133
chr15	83305785	83305785	1	*	63.166898587274176	chr15	83305342	83306341	1000	-	promoter:114514	ENSMUST00000226816.1	66251	Arfgap3	mm10_genes_promoters	chr15:83305785
chr18	32388391	32388391	1	*	50.678939836826075	chr18	32377491	32406099	28609	+	intron:632945	ENSMUST00000234857.1	30948	Bin1	mm10_genes_introns	chr18:32388391
chr5	122653307	122653307	1	*	40.90002063414584	chr5	122652896	122654160	1265	+	intron:193097	ENSMUST00000100737.9	18439	P2rx7	mm10_genes_introns	chr5:122653307
chr10	43298818	43298818	1	*	-38.41277213851816	chr10	43298799	43298933	135	+	exon:469599	ENSMUST00000160823.7	71365	Pdss2	mm10_genes_exons	chr10:43298818
chr10	43298836	43298836	1	*	-38.41277213851816	chr10	43298799	43298933	135	+	exon:469599	ENSMUST00000160823.7	71365	Pdss2	mm10_genes_exons	chr10:43298836
chr11	50886515	50886515	1	*	57.93594617170217	chr11	50886499	50887365	867	-	intron:449453	ENSMUST00000050595.12	237758	Zfp454	mm10_genes_introns	chr11:50886515
chr11	102778380	102778380	1	*	-54.04067942845394	chr11	102777631	102780262	2632	+	exon:527127	ENSMUST00000068150.6	11488	Adam11	mm10_genes_exons	chr11:102778380
chr19	55390418	55390418	1	*	-44.62481082726711	chr19	55381020	55391783	10764	+	intron:657595	ENSMUST00000225529.1	53611	Vti1a	mm10_genes_introns	chr19:55390418
chr1	9878419	9878419	1	*	58.980533628135134	chr1	9877254	9879025	1772	+	intron:540	ENSMUST00000166384.7	170755	Sgk3	mm10_genes_introns	chr1:9878419
chrX	51204928	51204928	1	*	-43.983203768477075	chrX	51139369	51205773	66405	-	intron:686657	ENSMUST00000114875.7	171170	Mbnl3	mm10_genes_introns	chrX:51204928
chr7	44325948	44325948	1	*	-42.62499942046076	chr7	44325705	44325955	251	+	intron:266446	ENSMUST00000107938.7	243961	Shank1	mm10_genes_introns	chr7:44325948
chr19	54047678	54047678	1	*	57.05822110900801	chr19	54044151	54048982	4832	+	exon:790114	ENSMUST00000036700.6	11551	Adra2a	mm10_genes_exons	chr19:54047678
chr11	115566797	115566797	1	*	42.136581886454785	chr11	115565115	115569114	4000	+	1to5kb:88478	ENSMUST00000144473.7	445007	Nup85	mm10_genes_1to5kb	chr11:115566797
chr12	111431036	111431036	1	*	-39.74543468019872	chr12	111430669	111431678	1010	+	exon:577846	ENSMUST00000223050.1	74190	Exoc3l4	mm10_genes_exons	chr12:111431036
chr1	74275325	74275325	1	*	-51.70988686967885	chr1	74273550	74277549	4000	+	1to5kb:1352	ENSMUST00000077985.3	227289	Gpbar1	mm10_genes_1to5kb	chr1:74275325
chr5	117898285	117898285	1	*	44.09064039308169	chr5	117897803	117900470	2668	+	intron:191776	ENSMUST00000142742.8	18125	Nos1	mm10_genes_introns	chr5:117898285
chr8	108373266	108373266	1	*	64.16182109050702	chr8	108325298	108517645	192348	+	intron:328090	ENSMUST00000220518.1	11906	Zfhx3	mm10_genes_introns	chr8:108373266
chr9	22139985	22139985	1	*	-38.94774565269459	chr9	22136712	22140711	4000	-	1to5kb:74657	ENSMUST00000165735.8	11433	Acp5	mm10_genes_1to5kb	chr9:22139985
chr10	128516381	128516381	1	*	-40.342910430935255	chr10	128513031	128517030	4000	-	1to5kb:84489	ENSMUST00000184514.1	102465552	Mir6916	mm10_genes_1to5kb	chr10:128516381
chr8	119679345	119679345	1	*	-51.778356031497275	chr8	119679268	119679457	190	+	exon:396140	ENSMUST00000212901.1	67866	Wfdc1	mm10_genes_exons	chr8:119679345
chr18	57564434	57564434	1	*	48.51544165195141	chr18	57564043	57591967	27925	+	intron:636179	ENSMUST00000079738.9	75444	Ccdc192	mm10_genes_introns	chr18:57564434
chr12	54067799	54067799	1	*	-37.70844147362084	chr12	54067738	54069532	1795	+	exon:567968	ENSMUST00000223358.1	27386	Npas3	mm10_genes_exons	chr12:54067799
chr2	91113431	91113431	1	*	52.634353537476564	chr2	91113144	91117143	4000	+	1to5kb:11299	ENSMUST00000111430.9	17868	Mybpc3	mm10_genes_1to5kb	chr2:91113431
chr8	120669055	120669055	1	*	-32.15642070121095	chr8	120668122	120669121	1000	-	promoter:69671	ENSMUST00000034277.13	18117	Emc8	mm10_genes_promoters	chr8:120669055
chr4	118692812	118692812	1	*	-47.44371343502733	chr4	118691464	118695463	4000	-	1to5kb:32427	ENSMUST00000060562.5	258708	Olfr1342	mm10_genes_1to5kb	chr4:118692812
chr11	50074107	50074107	1	*	-61.55943256724217	chr11	50071422	50085740	14319	+	intron:423688	ENSMUST00000054684.13	59044	Rnf130	mm10_genes_introns	chr11:50074107
chr6	37404755	37404755	1	*	-37.12037310623227	chr6	37380029	37441698	61670	-	intron:244078	ENSMUST00000041093.5	208647	Creb3l2	mm10_genes_introns	chr6:37404755
chr8	122854818	122854818	1	*	-50.11866085016572	chr8	122848530	122856501	7972	+	intron:330255	ENSMUST00000034443.6	12555	Cdh15	mm10_genes_introns	chr8:122854818
chr5	149197842	149197842	1	*	-61.443282321205594	chr5	149194441	149198644	4204	+	intron:198842	ENSMUST00000121416.7	231915	Uspl1	mm10_genes_introns	chr5:149197842
chr12	54068211	54068211	1	*	35.40396230000219	chr12	54067738	54069532	1795	+	exon:567968	ENSMUST00000223358.1	27386	Npas3	mm10_genes_exons	chr12:54068211
chr5	116501776	116501776	1	*	-48.177975316080705	chr5	116482537	116591333	108797	-	intron:213899	ENSMUST00000076124.6	68955	Srrm4	mm10_genes_introns	chr5:116501776
chr16	21644583	21644583	1	*	-53.50934516314595	chr16	21644121	21644680	560	+	exon:692030	ENSMUST00000096192.11	209018	Vps8	mm10_genes_exons	chr16:21644583
chr4	151130269	151130269	1	*	-46.89914619612201	chr4	151129496	151130495	1000	-	promoter:33858	ENSMUST00000105668.7	100072	Camta1	mm10_genes_promoters	chr4:151130269
chr7	44344201	44344201	1	*	-47.75647264009082	chr7	44343739	44344297	559	+	intron:266455	ENSMUST00000107938.7	243961	Shank1	mm10_genes_introns	chr7:44344201
chr17	43930665	43930665	1	*	-37.892068054157725	chr17	43836498	44017766	181269	+	intron:607087	ENSMUST00000228972.1	53901	Rcan2	mm10_genes_introns	chr17:43930665
chr7	135410484	135410484	1	*	-46.11741402796651	chr7	135410308	135410940	633	+	exon:338721	ENSMUST00000060356.7	270004	Foxi2	mm10_genes_exons	chr7:135410484
chr1	132586899	132586899	1	*	-45.726377570091564	chr1	132584481	132588073	3593	-	intron:34933	ENSMUST00000094569.10	269116	Nfasc	mm10_genes_introns	chr1:132586899
chr17	35682629	35682629	1	*	53.934289262202604	chr17	35682624	35682773	150	-	exon:748393	ENSMUST00000119825.7	12305	Ddr1	mm10_genes_exons	chr17:35682629
chr7	132767415	132767415	1	*	-36.10922859287954	chr7	132760168	132771577	11410	-	intron:309956	ENSMUST00000097999.8	77938	Fam53b	mm10_genes_introns	chr7:132767415
chr13	46927720	46927720	1	*	-66.12904902049566	chr13	46864832	46929215	64384	-	intron:507070	ENSMUST00000056978.7	16553	Kif13a	mm10_genes_introns	chr13:46927720
chr7	45797308	45797308	1	*	48.644072639545975	chr7	45795562	45798198	2637	+	intron:267935	ENSMUST00000209617.1	381983	Lmtk3	mm10_genes_introns	chr7:45797308
chr17	29321836	29321836	1	*	48.42410644918764	chr17	29319392	29322185	2794	+	intron:600985	ENSMUST00000234782.1	74116	Pi16	mm10_genes_introns	chr17:29321836
chrX	161717674	161717674	1	*	-44.66470876815537	chrX	161717627	161717862	236	+	5UTR:93041	ENSMUST00000061514.7	24004	Rai2	mm10_genes_5UTRs	chrX:161717674
chr4	148881609	148881609	1	*	-40.78539041208713	chr4	148838421	148890321	51901	+	intron:152928	ENSMUST00000094464.9	69743	Casz1	mm10_genes_introns	chr4:148881609
chr9	14817679	14817679	1	*	-37.70214552448474	chr9	14816970	14819415	2446	+	intron:346829	ENSMUST00000034405.10	17535	Mre11a	mm10_genes_introns	chr9:14817679
chr3	135689192	135689192	1	*	50.46437713317245	chr3	135669340	135691122	21783	-	intron:133067	ENSMUST00000029812.13	18033	Nfkb1	mm10_genes_introns	chr3:135689192
chr4	128591444	128591444	1	*	-41.56874308518748	chr4	128590963	128594962	4000	-	1to5kb:32769	ENSMUST00000084276.11	269585	Zscan20	mm10_genes_1to5kb	chr4:128591444
chr2	122233489	122233489	1	*	57.78438872689586	chr2	122229749	122233748	4000	+	1to5kb:12124	ENSMUST00000110551.3	20322	Sord	mm10_genes_1to5kb	chr2:122233489
chr6	83420778	83420778	1	*	39.1945988723608	chr6	83404825	83441216	36392	-	intron:247963	ENSMUST00000089622.10	194388	Tet3	mm10_genes_introns	chr6:83420778
chr14	66005016	66005016	1	*	46.146116974070246	chr14	66004177	66005836	1660	-	intron:539761	ENSMUST00000059970.8	268756	Gulo	mm10_genes_introns	chr14:66005016
chr8	105142575	105142575	1	*	45.15618511676076	chr8	105142492	105142755	264	+	intron:326740	ENSMUST00000161289.1	234677	Ces4a	mm10_genes_introns	chr8:105142575

## Sheet: F1 Cortex
seqnames	start	end	width	strand	name	annot.seqnames	annot.start	annot.end	annot.width	annot.strand	annot.id	annot.tx_id	annot.gene_id	annot.symbol	annot.type	chrpos
chr1	62720316	62720316	1	*	92.27435473146998	chr1	62719108	62738288	19181	+	intron:6126	ENSMUST00000126344.1	18187	Nrp2	mm10_genes_introns	chr1:62720316
chr1	191540992	191540992	1	*	-92.45759692667966	chr1	191540704	191541536	833	-	exon:52018	ENSMUST00000195650.5	76843	Dtl	mm10_genes_exons	chr1:191540992
chr1	191541022	191541022	1	*	-92.45759692667966	chr1	191540704	191541536	833	-	exon:52018	ENSMUST00000195650.5	76843	Dtl	mm10_genes_exons	chr1:191541022
chr11	75166343	75166343	1	*	-85.66171081867775	chr11	75164565	75167544	2980	-	exon:547049	ENSMUST00000055619.4	15248	Hic1	mm10_genes_exons	chr11:75166343
chr12	73750329	73750329	1	*	96.1624247554219	chr12	73721891	73758885	36995	+	intron:475566	ENSMUST00000221153.1	18755	Prkch	mm10_genes_introns	chr12:73750329
chr13	41213535	41213535	1	*	86.83182528234363	chr13	41197199	41220354	23156	-	intron:506671	ENSMUST00000021793.14	54326	Elovl2	mm10_genes_introns	chr13:41213535
chr14	31421324	31421324	1	*	87.63451739764308	chr14	31418678	31422677	4000	-	1to5kb:108132	ENSMUST00000100730.9	24056	Sh3bp5	mm10_genes_1to5kb	chr14:31421324
chr15	36126842	36126842	1	*	-92.56108665938807	chr15	36122333	36139878	17546	-	intron:557795	ENSMUST00000172831.7	626596	Rgs22	mm10_genes_introns	chr15:36126842
chr15	86089259	86089259	1	*	-93.18006646554477	chr15	86057832	86091312	33481	+	intron:552574	ENSMUST00000088931.9	223752	Gramd4	mm10_genes_introns	chr15:86089259
chr16	30278450	30278450	1	*	90.28310059008327	chr16	30274523	30283167	8645	-	intron:587948	ENSMUST00000064606.7	74488	Lrrc15	mm10_genes_introns	chr16:30278450
chr17	70753884	70753884	1	*	-93.0217705892868	chr17	70662810	70761074	98265	+	intron:610026	ENSMUST00000133983.7	224997	Dlgap1	mm10_genes_introns	chr17:70753884
chr17	71527706	71527706	1	*	-96.44121351136276	chr17	71526858	71527857	1000	-	promoter:126599	ENSMUST00000024851.9	67052	Ndc80	mm10_genes_promoters	chr17:71527706
chr17	86803169	86803169	1	*	89.95803198076338	chr17	86797307	86805192	7886	+	intron:612412	ENSMUST00000024954.10	13819	Epas1	mm10_genes_introns	chr17:86803169
chr3	104811977	104811977	1	*	-83.9291792765237	chr3	104805108	104817935	12828	-	intron:129578	ENSMUST00000002297.11	17454	Mov10	mm10_genes_introns	chr3:104811977
chr3	108476903	108476903	1	*	-87.27908906864964	chr3	108475050	108480975	5926	-	intron:130579	ENSMUST00000106625.9	229722	5330417C22Rik	mm10_genes_introns	chr3:108476903
chr4	59675122	59675122	1	*	94.45523876436377	chr4	59626492	59690143	63652	+	intron:140061	ENSMUST00000070150.10	230259	E130308A19Rik	mm10_genes_introns	chr4:59675122
chr4	123793398	123793398	1	*	-88.01597874728292	chr4	123793205	123797204	4000	+	1to5kb:28808	ENSMUST00000150286.1	230726	Rhbdl2	mm10_genes_1to5kb	chr4:123793398
chr4	123793417	123793417	1	*	-88.01597874728292	chr4	123793205	123797204	4000	+	1to5kb:28808	ENSMUST00000150286.1	230726	Rhbdl2	mm10_genes_1to5kb	chr4:123793417
chr4	123793428	123793428	1	*	-88.00182308205399	chr4	123793205	123797204	4000	+	1to5kb:28808	ENSMUST00000150286.1	230726	Rhbdl2	mm10_genes_1to5kb	chr4:123793428
chr4	151718142	151718142	1	*	-91.40606203612069	chr4	151586483	151830417	243935	-	intron:174054	ENSMUST00000169423.8	100072	Camta1	mm10_genes_introns	chr4:151718142
chr4	154586393	154586393	1	*	-88.02132701641591	chr4	154528932	154636722	107791	-	intron:174905	ENSMUST00000030902.12	70673	Prdm16	mm10_genes_introns	chr4:154586393
chr5	27242224	27242224	1	*	-85.63781154728882	chr5	26818119	27382754	564636	+	intron:178424	ENSMUST00000071500.12	13483	Dpp6	mm10_genes_introns	chr5:27242224
chr7	37371213	37371213	1	*	-85.86854539263584	chr7	37321101	37479280	158180	-	intron:294589	ENSMUST00000206763.2	243937	Zfp536	mm10_genes_introns	chr7:37371213
chrX	10216454	10216454	1	*	96.4026652387842	chrX	10216454	10217453	1000	-	promoter:137776	ENSMUST00000115534.7	19893	Rpgr	mm10_genes_promoters	chrX:10216454
chrX	59568649	59568649	1	*	91.24198783193093	chrX	59568072	59569071	1000	-	promoter:138366	ENSMUST00000119833.7	14168	Fgf13	mm10_genes_promoters	chrX:59568649
chrX	93296420	93296420	1	*	95.93869937279115	chrX	93294939	93297162	2224	+	intron:677354	ENSMUST00000046565.12	11878	Arx	mm10_genes_introns	chrX:93296420
chrX	94636369	94636369	1	*	88.5995527966507	chrX	94636069	94638559	2491	+	exon:813763	ENSMUST00000096368.3	14853	Gspt2	mm10_genes_exons	chrX:94636369
chr18	32431566	32431566	1	*	-83.33055294293075	chr18	32424968	32431670	6703	+	intron:632954	ENSMUST00000234857.1	30948	Bin1	mm10_genes_introns	chr18:32431566
chr10	77690691	77690691	1	*	-87.4909640547306	chr10	77686898	77829466	142569	+	intron:395516	ENSMUST00000092366.3	252974	Tspear	mm10_genes_introns	chr10:77690691
chr2	37782141	37782141	1	*	86.26319191397407	chr2	37776447	37783199	6753	+	intron:52391	ENSMUST00000050372.9	241324	Crb2	mm10_genes_introns	chr2:37782141
chr6	92458127	92458127	1	*	-85.8749058517468	chr6	92425694	92458474	32781	-	intron:249662	ENSMUST00000113447.7	243548	Prickle2	mm10_genes_introns	chr6:92458127
chr7	49327585	49327585	1	*	-87.83334148143489	chr7	48964441	49362097	397657	+	intron:268489	ENSMUST00000183659.7	78286	Nav2	mm10_genes_introns	chr7:49327585
chr17	53612543	53612543	1	*	-82.27470477647142	chr17	53610991	53624351	13361	+	intron:608323	ENSMUST00000163648.1	18519	Kat2b	mm10_genes_introns	chr17:53612543
chr5	148342290	148342290	1	*	-80.51723629504977	chr5	148342156	148342737	582	-	intron:222364	ENSMUST00000048116.14	11987	Slc7a1	mm10_genes_introns	chr5:148342290
chr13	41341682	41341682	1	*	81.85844189593577	chr13	41339021	41425860	86840	-	intron:506685	ENSMUST00000021794.13	18003	Nedd9	mm10_genes_introns	chr13:41341682
chr6	135833198	135833198	1	*	85.05255785258474	chr6	135780337	135843087	62751	-	intron:256382	ENSMUST00000053880.12	14812	Grin2b	mm10_genes_introns	chr6:135833198
chrX	159370419	159370419	1	*	-85.19122188525526	chrX	159367178	159371177	4000	+	1to5kb:137370	ENSMUST00000133252.1	66235	Eif1ax	mm10_genes_1to5kb	chrX:159370419
chrX	59568637	59568637	1	*	77.11133121317617	chrX	59568072	59569071	1000	-	promoter:138366	ENSMUST00000119833.7	14168	Fgf13	mm10_genes_promoters	chrX:59568637
chr1	20470434	20470434	1	*	-80.799306964029455	chr1	20450378	20502941	52564	-	intron:23096	ENSMUST00000088448.11	241035	Pkhd1	mm10_genes_introns	chr1:20470434
chr11	102832878	102832878	1	*	-79.39687627537248	chr11	102830849	102834848	4000	+	1to5kb:88089	ENSMUST00000107073.7	75689	Higd1b	mm10_genes_1to5kb	chr11:102832878
chr17	35111702	35111702	1	*	-81.16552826651844	chr17	35110832	35111789	958	+	intron:605804	ENSMUST00000037849.2	114652	Ly6g5c	mm10_genes_introns	chr17:35111702
chr2	34031307	34031307	1	*	70.23017483069832	chr2	34025958	34031445	5488	-	intron:79013	ENSMUST00000134921.1	329387	C230014O12Rik	mm10_genes_introns	chr2:34031307
chr5	148402874	148402874	1	*	-84.41116601418948	chr5	148400905	148404904	4000	-	1to5kb:42993	ENSMUST00000048116.14	11987	Slc7a1	mm10_genes_1to5kb	chr5:148402874
chr1	133164946	133164946	1	*	-79.78035519150883	chr1	133164541	133170012	5472	+	intron:14436	ENSMUST00000212252.1	240753	Plekha6	mm10_genes_introns	chr1:133164946
chr18	61039589	61039589	1	*	-74.94006791850201	chr18	61037200	61041199	4000	-	1to5kb:130049	ENSMUST00000025521.8	12590	Cdx1	mm10_genes_1to5kb	chr18:61039589
chr7	49961742	49961742	1	*	83.63615907840193	chr7	49959269	49963856	4588	+	exon:322338	ENSMUST00000056442.11	104245	Slc6a5	mm10_genes_exons	chr7:49961742
chr8	10464479	10464479	1	*	75.78769453455192	chr8	10462196	10474623	12428	+	intron:314261	ENSMUST00000207477.1	244281	Myo16	mm10_genes_introns	chr8:10464479
chr12	112589457	112589457	1	*	-86.21895836886225	chr12	112589266	112589535	270	+	5UTR:65284	ENSMUST00000220786.1	70435	Inf2	mm10_genes_5UTRs	chr12:112589457
chr19	16877893	16877893	1	*	-85.26536708332353	chr19	16874806	16878805	4000	-	1to5kb:133860	ENSMUST00000072915.3	14240	Foxb2	mm10_genes_1to5kb	chr19:16877893
chr12	109576554	109576554	1	*	-67.14475011746005	chr12	109575233	109579232	4000	+	1to5kb:95658	ENSMUST00000103837.2	100124466	Mir493	mm10_genes_1to5kb	chr12:109576554
chr4	108335622	108335622	1	*	-82.90790305298769	chr4	108332352	108338122	5771	+	intron:144185	ENSMUST00000131656.1	69893	Coa7	mm10_genes_introns	chr4:108335622
chrX	20425928	20425928	1	*	78.82282715645017	chrX	20425831	20429022	3192	+	intron:672878	ENSMUST00000115384.8	382207	Jade3	mm10_genes_introns	chrX:20425928
chr14	13333086	13333086	1	*	-77.14121761618745	chr14	13285207	13493507	208301	+	intron:517110	ENSMUST00000070323.11	72003	Synpr	mm10_genes_introns	chr14:13333086
chr4	62619951	62619951	1	*	-83.68975170865743	chr4	62618531	62622530	4000	+	1to5kb:27558	ENSMUST00000143042.7	50780	Rgs3	mm10_genes_1to5kb	chr4:62619951
chr17	57061537	57061537	1	*	-67.14238949771581	chr17	57061231	57062230	1000	+	promoter:122866	ENSMUST00000097299.9	224912	Crb3	mm10_genes_promoters	chr17:57061537
chr2	33584495	33584495	1	*	-77.63155992101022	chr2	33569283	33639488	70206	-	intron:78974	ENSMUST00000041730.10	16917	Lmx1b	mm10_genes_introns	chr2:33584495
chr4	14529828	14529828	1	*	-83.97615964999204	chr4	14524569	14532558	7990	-	intron:156280	ENSMUST00000042221.13	208890	Slc26a7	mm10_genes_introns	chr4:14529828
chr13	108269857	108269857	1	*	79.46072542895084	chr13	108267381	108270632	3252	+	intron:502112	ENSMUST00000022207.9	74559	Elovl7	mm10_genes_introns	chr13:108269857
chrX	73228610	73228610	1	*	-75.29401483933083	chrX	73228291	73230795	2505	+	exon:811871	ENSMUST00000105111.3	14070	F8a	mm10_genes_exons	chrX:73228610
chr4	40509855	40509855	1	*	-83.81268343548918	chr4	40491724	40521745	30022	-	intron:157135	ENSMUST00000146043.1	71293	4933428C19Rik	mm10_genes_introns	chr4:40509855
chr17	44505949	44505949	1	*	-83.16747030780898	chr17	44497244	44638512	141269	-	intron:624086	ENSMUST00000162816.7	12393	Runx2	mm10_genes_introns	chr17:44505949
chr11	44533387	44533387	1	*	-66.33752065296873	chr11	44531385	44542628	11244	+	intron:423065	ENSMUST00000019333.9	74315	Rnf145	mm10_genes_introns	chr11:44533387
chr5	124025926	124025926	1	*	73.79967974499469	chr5	124010860	124032101	21242	-	intron:216088	ENSMUST00000040967.8	330192	Vps37b	mm10_genes_introns	chr5:124025926
chrX	134296899	134296899	1	*	77.35403525168525	chrX	134295630	134304456	8827	+	intron:679477	ENSMUST00000037687.7	67564	Tmem35a	mm10_genes_introns	chrX:134296899
chrX	16910755	16910755	1	*	-73.42214110601672	chrX	16894782	16911385	16604	-	intron:684892	ENSMUST00000040134.7	17986	Ndp	mm10_genes_introns	chrX:16910755
chr3	97746000	97746000	1	*	-76.72807286080015	chr3	97743603	97746671	3069	-	intron:128668	ENSMUST00000168438.8	83679	Pde4dip	mm10_genes_introns	chr3:97746000
chr11	105339314	105339314	1	*	-76.78523766154517	chr11	105335832	105339831	4000	+	1to5kb:88199	ENSMUST00000151135.1	17534	Mrc2	mm10_genes_1to5kb	chr11:105339314
chr4	123793400	123793400	1	*	-80.88849403024571	chr4	123793205	123797204	4000	+	1to5kb:28808	ENSMUST00000150286.1	230726	Rhbdl2	mm10_genes_1to5kb	chr4:123793400
chr7	80456746	80456746	1	*	77.73674549495657	chr7	80455437	80458812	3376	-	intron:300473	ENSMUST00000206901.1	12144	Blm	mm10_genes_introns	chr7:80456746
chr3	129573001	129573001	1	*	-70.26731633080038	chr3	129532769	129605040	72272	+	intron:117194	ENSMUST00000199910.4	170439	Elovl6	mm10_genes_introns	chr3:129573001
chr18	82972549	82972549	1	*	78.52551961670865	chr18	82957450	82986743	29294	+	intron:639809	ENSMUST00000171238.7	329003	Zfp516	mm10_genes_introns	chr18:82972549
chr4	46960366	46960366	1	*	-82.58066671045148	chr4	46875803	46991107	115305	-	intron:158803	ENSMUST00000107749.3	242425	Gabbr2	mm10_genes_introns	chr4:46960366
chr12	108484731	108484731	1	*	77.6415647239419	chr12	108471986	108488288	16303	+	intron:480733	ENSMUST00000138456.7	68519	Eml1	mm10_genes_introns	chr12:108484731
chr15	91014710	91014710	1	*	-76.5574026198121	chr15	90998056	91049658	51603	-	intron:567298	ENSMUST00000100304.10	16564	Kif21a	mm10_genes_introns	chr15:91014710
chr14	35206638	35206638	1	*	72.27582222106125	chr14	35026951	35251693	224743	+	intron:521600	ENSMUST00000043349.6	14803	Grid1	mm10_genes_introns	chr14:35206638
chr10	4027728	4027728	1	*	-79.71978642015162	chr10	4027280	4031279	4000	+	1to5kb:78087	ENSMUST00000154517.1	270685	Mthfd1l	mm10_genes_1to5kb	chr10:4027728
chr8	121772410	121772410	1	*	-68.4145416771808	chr8	121753745	121782160	28416	+	intron:329910	ENSMUST00000169735.1	57340	Jph3	mm10_genes_introns	chr8:121772410
chr7	6937064	6937064	1	*	-77.27045921517312	chr7	6932684	6952221	19538	+	intron:259646	ENSMUST00000200535.5	57775	Usp29	mm10_genes_introns	chr7:6937064
chr4	46698790	46698790	1	*	72.94791902637455	chr4	46684383	46718785	34403	-	intron:158791	ENSMUST00000107749.3	242425	Gabbr2	mm10_genes_introns	chr4:46698790
chr4	40509834	40509834	1	*	-72.10328133333147	chr4	40491724	40521745	30022	-	intron:157135	ENSMUST00000146043.1	71293	4933428C19Rik	mm10_genes_introns	chr4:40509834
chr7	105625449	105625449	1	*	-68.62007288936184	chr7	105625406	105625571	166	-	exon:366092	ENSMUST00000106791.7	55992	Trim3	mm10_genes_exons	chr7:105625449
chr9	89738746	89738746	1	*	-72.57011925312685	chr9	89738446	89739445	1000	-	promoter:76718	ENSMUST00000060700.3	330998	Ankrd34c	mm10_genes_promoters	chr9:89738746
chr1	91078191	91078191	1	*	71.69589973928825	chr1	91076992	91078390	1399	+	intron:10982	ENSMUST00000189505.6	16978	Lrrfip1	mm10_genes_introns	chr1:91078191
chr13	38485101	38485101	1	*	-68.4619044518333	chr13	38485040	38485738	699	+	intron:496120	ENSMUST00000171970.2	12161	Bmp6	mm10_genes_introns	chr13:38485101
chr17	70753909	70753909	1	*	-75.16662539385142	chr17	70662810	70761074	98265	+	intron:610026	ENSMUST00000133983.7	224997	Dlgap1	mm10_genes_introns	chr17:70753909
chr15	12402349	12402349	1	*	-75.97669091257481	chr15	12402295	12402523	229	-	exon:670068	ENSMUST00000075317.11	68070	Pdzd2	mm10_genes_exons	chr15:12402349
chr8	70167126	70167126	1	*	-79.53102790712762	chr8	70167066	70167488	423	+	exon:385343	ENSMUST00000110143.7	17259	Mef2b	mm10_genes_exons	chr8:70167126
chr7	107595695	107595695	1	*	-60.06942977164713	chr7	107595285	107595731	447	+	5UTR:37298	ENSMUST00000208956.1	19024	Ppfibp2	mm10_genes_5UTRs	chr7:107595695
chr4	47027426	47027426	1	*	76.30884003966004	chr4	47026711	47030710	4000	-	1to5kb:31109	ENSMUST00000152479.1	75691	Anks6	mm10_genes_1to5kb	chr4:47027426
chr7	46869671	46869671	1	*	-76.55189051228132	chr7	46869599	46869772	174	+	exon:321925	ENSMUST00000014545.10	16833	Ldhc	mm10_genes_exons	chr7:46869671
chr12	5407545	5407545	1	*	-75.37423697887525	chr12	5406641	5410640	4000	+	1to5kb:93507	ENSMUST00000163627.2	72669	2810032G03Rik	mm10_genes_1to5kb	chr12:5407545
chr13	24710140	24710140	1	*	79.72091740226473	chr13	24710123	24710291	169	+	exon:594250	ENSMUST00000110383.7	193385	Ripor2	mm10_genes_exons	chr13:24710140
chr11	60189665	60189665	1	*	-79.77969919155863	chr11	60185096	60190622	5527	+	exon:511890	ENSMUST00000064190.12	19377	Rai1	mm10_genes_exons	chr11:60189665
chr2	11288117	11288117	1	*	-77.35278993866885	chr2	11283885	11290388	6504	+	intron:44877	ENSMUST00000028118.8	18761	Prkcq	mm10_genes_introns	chr2:11288117
chr9	116762486	116762486	1	*	-73.62103153635834	chr9	116719423	116805412	85990	-	intron:385850	ENSMUST00000111773.9	207181	Rbms3	mm10_genes_introns	chr9:116762486
chr12	83792142	83792142	1	*	-69.23491820850988	chr12	83791832	83792382	551	+	exon:572536	ENSMUST00000121733.7	170721	Papln	mm10_genes_exons	chr12:83792142
chr16	17645680	17645680	1	*	-54.6757439583872	chr16	17645470	17646469	1000	+	promoter:115908	ENSMUST00000182822.7	72315	Ccdc74a	mm10_genes_promoters	chr16:17645680
chrX	7573591	7573591	1	*	-67.18397326160367	chrX	7572600	7573599	1000	+	promoter:134987	ENSMUST00000144719.8	78185	Flicr	mm10_genes_promoters	chrX:7573591
chr8	118279839	118279839	1	*	-74.04597431470404	chr8	118278733	118282732	4000	+	1to5kb:66567	ENSMUST00000117160.1	12554	Cdh13	mm10_genes_1to5kb	chr8:118279839
chr18	42066584	42066584	1	*	-76.24267603630706	chr18	42054196	42101531	47336	+	intron:634990	ENSMUST00000072008.10	269016	Sh3rf2	mm10_genes_introns	chr18:42066584
chr9	43264165	43264165	1	*	-73.7648060503942	chr9	43263201	43264200	1000	+	promoter:71123	ENSMUST00000210869.1	235302	D630033O11Rik	mm10_genes_promoters	chr9:43264165
chr6	37180916	37180916	1	*	76.69257121395874	chr6	37149658	37299562	149905	-	intron:243919	ENSMUST00000101532.9	320127	Dgki	mm10_genes_introns	chr6:37180916
chr11	55461450	55461450	1	*	-70.35445911182121	chr11	55461240	55462239	1000	-	promoter:90075	ENSMUST00000108857.1	11927	Atox1	mm10_genes_promoters	chr11:55461450
chr7	27658185	27658185	1	*	77.21594166637954	chr7	27657852	27658532	681	-	exon:349261	ENSMUST00000036453.13	269881	Map3k10	mm10_genes_exons	chr7:27658185
chrX	94636321	94636321	1	*	81.22485573014959	chrX	94636069	94638559	2491	+	exon:813763	ENSMUST00000096368.3	14853	Gspt2	mm10_genes_exons	chrX:94636321
chr9	59947408	59947408	1	*	59.29295411720079	chr9	59947313	59947553	241	-	exon:451862	ENSMUST00000130831.7	23958	Nr2e3	mm10_genes_exons	chr9:59947408
chr8	111932359	111932359	1	*	75.50210056643294	chr8	111918957	111933359	14403	-	intron:343887	ENSMUST00000034429.8	234740	Tmem231	mm10_genes_introns	chr8:111932359
chr12	99197200	99197200	1	*	-59.795546241186116	chr12	99196814	99209460	12647	-	intron:490595	ENSMUST00000046859.11	71375	Foxn3	mm10_genes_introns	chr12:99197200
chr15	56764351	56764351	1	*	-64.01748800346707	chr15	56694078	56777727	83650	+	intron:547508	ENSMUST00000166290.1	594843	Has2os	mm10_genes_introns	chr15:56764351
chr19	44785890	44785890	1	*	-74.89313731731595	chr19	44761886	44788776	26891	+	intron:655925	ENSMUST00000174490.8	18504	Pax2	mm10_genes_introns	chr19:44785890
chrX	135742436	135742436	1	*	-80.74750172037712	chrX	135741733	135742732	1000	+	promoter:136886	ENSMUST00000096321.2	494468	Armcx5	mm10_genes_promoters	chrX:135742436
chr13	28709797	28709797	1	*	-67.26562340395165	chr13	28669995	28772618	102624	-	intron:505489	ENSMUST00000148885.7	72518	2610307P16Rik	mm10_genes_introns	chr13:28709797
chr15	78410670	78410670	1	*	66.42483189124637	chr15	78406908	78410907	4000	-	1to5kb:114108	ENSMUST00000058659.8	22117	Tst	mm10_genes_1to5kb	chr15:78410670
chr4	104913945	104913945	1	*	82.109042316830525	chr4	104913691	104945103	31413	+	intron:143122	ENSMUST00000106803.8	242594	Fyb2	mm10_genes_introns	chr4:104913945
chr13	60099673	60099673	1	*	78.09481279920111	chr13	60029862	60110478	80617	+	intron:498545	ENSMUST00000225266.1	328263	A530065N20Rik	mm10_genes_introns	chr13:60099673
chr5	44101960	44101960	1	*	-72.7427543548788	chr5	44101955	44102954	1000	-	promoter:39773	ENSMUST00000074113.12	19126	Prom1	mm10_genes_promoters	chr5:44101960
chr19	40400466	40400466	1	*	-81.76769243305321	chr19	40398611	40402257	3647	-	intron:666560	ENSMUST00000226047.1	20411	Sorbs1	mm10_genes_introns	chr19:40400466
chr7	80389164	80389164	1	*	82.20800237896955	chr7	80388937	80392936	4000	-	1to5kb:60673	ENSMUST00000205617.1	14159	Fes	mm10_genes_1to5kb	chr7:80389164
chr8	36649077	36649077	1	*	80.68407816229927	chr8	36599441	36732587	133147	-	intron:335325	ENSMUST00000098826.9	50768	Dlc1	mm10_genes_introns	chr8:36649077
chr14	103565781	103565781	1	*	-70.18062946084835	chr14	103564843	103570170	5328	+	intron:528582	ENSMUST00000227322.1	64929	Scel	mm10_genes_introns	chr14:103565781
chr12	117251690	117251690	1	*	-82.4866123985063	chr12	117248701	117253602	4902	+	intron:483305	ENSMUST00000190247.6	19276	Ptprn2	mm10_genes_introns	chr12:117251690
chr2	167692389	167692389	1	*	-71.72412869892517	chr2	167690823	167694822	4000	-	1to5kb:19086	ENSMUST00000148262.1	407243	Tmem189	mm10_genes_1to5kb	chr2:167692389
chr2	167692393	167692393	1	*	-71.72412869892517	chr2	167690823	167694822	4000	-	1to5kb:19086	ENSMUST00000148262.1	407243	Tmem189	mm10_genes_1to5kb	chr2:167692393
chr2	167692435	167692435	1	*	-71.72412869892517	chr2	167690823	167694822	4000	-	1to5kb:19086	ENSMUST00000148262.1	407243	Tmem189	mm10_genes_1to5kb	chr2:167692435
chr10	13827918	13827918	1	*	-70.9850414633398	chr10	13826504	13829398	2895	-	exon:486964	ENSMUST00000161729.1	66253	Aig1	mm10_genes_exons	chr10:13827918
chr13	108170787	108170787	1	*	-70.88933113586933	chr13	108169492	108172701	3210	+	intron:502038	ENSMUST00000123657.7	71991	Ercc8	mm10_genes_introns	chr13:108170787
chr8	43180527	43180527	1	*	-72.61609394794509	chr8	43179541	43180540	1000	+	promoter:64497	ENSMUST00000209200.1	622117	Triml2	mm10_genes_promoters	chr8:43180527
chr8	95020589	95020589	1	*	-69.36640925981193	chr8	95019762	95020761	1000	+	promoter:65986	ENSMUST00000211994.1	54672	Adgrg3	mm10_genes_promoters	chr8:95020589
chr5	144919800	144919800	1	*	-73.79303737419019	chr5	144902579	144965500	62922	-	intron:221920	ENSMUST00000110677.7	75788	Smurf1	mm10_genes_introns	chr5:144919800
chr2	152912383	152912383	1	*	-71.75295391333154	chr2	152912040	152912514	475	+	exon:78685	ENSMUST00000028970.7	228785	Mylk2	mm10_genes_exons	chr2:152912383
chr6	118187129	118187129	1	*	-75.5775095405471	chr6	118184441	118197060	12620	-	intron:251865	ENSMUST00000032201.7	19713	Ret	mm10_genes_introns	chr6:118187129
chr5	131575319	131575319	1	*	-77.83854743512173	chr5	131533873	131770759	236887	-	intron:217532	ENSMUST00000161226.8	319974	Auts2	mm10_genes_introns	chr5:131575319
chr15	100613544	100613544	1	*	65.57680376389871	chr15	100610349	100614348	4000	+	1to5kb:112472	ENSMUST00000000356.9	23994	Dazap2	mm10_genes_1to5kb	chr15:100613544
chr11	77011152	77011152	1	*	70.71578319519313	chr11	77010784	77012920	2137	+	intron:431912	ENSMUST00000108402.8	15567	Slc6a4	mm10_genes_introns	chr11:77011152
chr6	54691005	54691005	1	*	-59.34669498069135	chr6	54689129	54698979	9851	+	intron:229009	ENSMUST00000190641.6	68235	Mturn	mm10_genes_introns	chr6:54691005
chr13	96748200	96748200	1	*	-78.4949333944396	chr13	96747272	96748271	1000	+	promoter:100982	ENSMUST00000208758.1	625662	Ankrd31	mm10_genes_promoters	chr13:96748200
chr4	118256447	118256447	1	*	78.49866979902264	chr4	118249010	118257488	8479	-	intron:165670	ENSMUST00000049074.12	19268	Ptprf	mm10_genes_introns	chr4:118256447
chrX	93297260	93297260	1	*	-71.94014584722368	chrX	93297163	93298357	1195	+	exon:813637	ENSMUST00000046565.12	11878	Arx	mm10_genes_exons	chrX:93297260
chr18	69574551	69574551	1	*	-68.6403891971256	chr18	69564685	69633576	68892	+	intron:638145	ENSMUST00000066717.11	21413	Tcf4	mm10_genes_introns	chr18:69574551
chr4	35035116	35035116	1	*	-75.63098030571412	chr4	34986119	35083769	97651	-	intron:156983	ENSMUST00000102975.9	214944	Mob3b	mm10_genes_introns	chr4:35035116
chr6	90625684	90625684	1	*	75.055446455298	chr6	90624920	90626379	1460	+	intron:233787	ENSMUST00000044019.15	71699	Slc41a3	mm10_genes_introns	chr6:90625684
chr11	88694758	88694758	1	*	66.90550157919785	chr11	88590148	88712437	122290	-	intron:458457	ENSMUST00000107909.7	76626	Msi2	mm10_genes_introns	chr11:88694758
chr13	53476548	53476548	1	*	-78.30767382343055	chr13	53474075	53478074	4000	-	1to5kb:102658	ENSMUST00000021922.9	17702	Msx2	mm10_genes_1to5kb	chr13:53476548
chr15	98720908	98720908	1	*	-68.59080129729432	chr15	98720782	98720957	176	+	intron:554035	ENSMUST00000003444.5	105833	Ccdc65	mm10_genes_introns	chr15:98720908
chr14	21994217	21994217	1	*	-68.55105872116636	chr14	21990602	21994601	4000	-	1to5kb:107847	ENSMUST00000043409.8	218820	Zfp503	mm10_genes_1to5kb	chr14:21994217
chr11	73111798	73111798	1	*	79.32954750388839	chr11	73111746	73111863	118	+	exon:517461	ENSMUST00000102537.9	16407	Itgae	mm10_genes_exons	chr11:73111798
chr9	121301567	121301567	1	*	58.23256038002612	chr9	121297834	121364000	66167	+	intron:366021	ENSMUST00000211301.1	67095	Trak1	mm10_genes_introns	chr9:121301567
chr7	80046062	80046062	1	*	-73.81860096289627	chr7	80024987	80081048	56062	+	intron:271415	ENSMUST00000164056.8	209225	Zfp710	mm10_genes_introns	chr7:80046062
chr11	97753576	97753576	1	*	-58.11047032066992	chr11	97752711	97753710	1000	-	promoter:91887	ENSMUST00000152395.1	67480	Cwc25	mm10_genes_promoters	chr11:97753576
chr9	80001216	80001216	1	*	81.92667911849378	chr9	79898477	80012642	114166	-	intron:378895	ENSMUST00000217264.1	70598	Filip1	mm10_genes_introns	chr9:80001216
chr2	119810166	119810166	1	*	66.34246292800321	chr2	119809846	119810845	1000	+	promoter:11931	ENSMUST00000137135.1	22174	Tyro3	mm10_genes_promoters	chr2:119810166
chr6	148354660	148354660	1	*	70.94696871373434	chr6	148353710	148354709	1000	+	promoter:47192	ENSMUST00000204242.1	66184	Rps4l	mm10_genes_promoters	chr6:148354660
chr4	154410820	154410820	1	*	-77.26835290258823	chr4	154367316	154476638	109323	-	intron:174903	ENSMUST00000030902.12	70673	Prdm16	mm10_genes_introns	chr4:154410820
chr12	85289769	85289769	1	*	-77.16953065409061	chr12	85289439	85293438	4000	-	1to5kb:97633	ENSMUST00000121930.1	66204	Acyp1	mm10_genes_1to5kb	chr12:85289769
chr15	73592656	73592656	1	*	79.45115310589661	chr15	73589963	73593962	4000	-	1to5kb:113653	ENSMUST00000152558.1	106068	Slc45a4	mm10_genes_1to5kb	chr15:73592656
chr16	28884100	28884100	1	*	68.66833605797684	chr16	28829010	28929452	100443	-	intron:587684	ENSMUST00000100023.2	239796	Mb21d2	mm10_genes_introns	chr16:28884100
chr2	160912460	160912460	1	*	77.27546671384742	chr2	160912318	160913317	1000	-	promoter:18813	ENSMUST00000109454.7	280635	Emilin3	mm10_genes_promoters	chr2:160912460
chr1	189727414	189727414	1	*	-64.82379658930674	chr1	189727268	189728267	1000	+	promoter:4080	ENSMUST00000097442.8	19250	Ptpn14	mm10_genes_promoters	chr1:189727414
chrX	73228575	73228575	1	*	-70.22151380505048	chrX	73228291	73230795	2505	+	exon:811871	ENSMUST00000105111.3	14070	F8a	mm10_genes_exons	chrX:73228575
chr2	152628265	152628265	1	*	78.05048923290252	chr2	152627967	152631966	4000	+	1to5kb:12884	ENSMUST00000139370.1	19700	Rem1	mm10_genes_1to5kb	chr2:152628265
chr4	137540722	137540722	1	*	-79.57747949889809	chr4	137540659	137540809	151	+	exon:179819	ENSMUST00000030547.14	15530	Hspg2	mm10_genes_exons	chr4:137540722
chrX	73228567	73228567	1	*	-70.17494658559106	chrX	73228291	73230795	2505	+	exon:811871	ENSMUST00000105111.3	14070	F8a	mm10_genes_exons	chrX:73228567
chrX	104670795	104670795	1	*	-77.75968393404958	chrX	104670664	104671064	401	-	exon:830101	ENSMUST00000042070.5	108672	Zdhhc15	mm10_genes_exons	chrX:104670795
chr7	110807468	110807468	1	*	76.3327301793534	chr7	110806085	110807779	1695	+	intron:276297	ENSMUST00000170374.7	11717	Ampd3	mm10_genes_introns	chr7:110807468
chr10	94926968	94926968	1	*	-66.74851674636845	chr10	94923658	94927657	4000	-	1to5kb:83810	ENSMUST00000180573.1	54712	Plxnc1	mm10_genes_1to5kb	chr10:94926968
chr5	131783089	131783089	1	*	-72.12949490863656	chr5	131770790	132030989	260200	-	intron:217533	ENSMUST00000161226.8	319974	Auts2	mm10_genes_introns	chr5:131783089
chr6	23420492	23420492	1	*	77.79931865842313	chr6	23413085	23427163	14079	-	intron:242257	ENSMUST00000166458.8	320405	Cadps2	mm10_genes_introns	chr6:23420492
chr8	115106249	115106249	1	*	-67.59340234811523	chr8	114712252	115351637	639386	+	intron:329162	ENSMUST00000004756.13	80707	Wwox	mm10_genes_introns	chr8:115106249
chr7	19489636	19489636	1	*	-64.67846312828385	chr7	19489608	19489763	156	+	exon:313380	ENSMUST00000137613.8	74463	Exoc3l2	mm10_genes_exons	chr7:19489636
chr12	109608071	109608071	1	*	74.29492548364456	chr12	109604516	109608515	4000	+	1to5kb:95684	ENSMUST00000238576.1	75745	Rian	mm10_genes_1to5kb	chr12:109608071
chr12	4873912	4873912	1	*	-58.78869361308254	chr12	4870262	4874261	4000	-	1to5kb:96228	ENSMUST00000153676.1	432628	Mfsd2b	mm10_genes_1to5kb	chr12:4873912
chr5	137036545	137036545	1	*	-68.5307919040888	chr5	137035792	137037417	1626	-	intron:219655	ENSMUST00000111080.7	11769	Ap1s1	mm10_genes_introns	chr5:137036545
chr12	112918127	112918127	1	*	76.60807698939556	chr12	112917320	112918319	1000	-	promoter:98359	ENSMUST00000220771.1	16450	Jag2	mm10_genes_promoters	chr12:112918127
chr17	5334783	5334783	1	*	72.37923972265163	chr17	5332638	5334963	2326	+	intron:594235	ENSMUST00000092723.10	239985	Arid1b	mm10_genes_introns	chr17:5334783
chr6	70792899	70792899	1	*	-72.7268010986394	chr6	70792233	70793232	1000	-	promoter:48653	ENSMUST00000066134.5	19895	Rpia	mm10_genes_promoters	chr6:70792899
chr8	110168699	110168699	1	*	-69.8268334092711	chr8	110168211	110169210	1000	-	promoter:69480	ENSMUST00000212297.1	12308	Calb2	mm10_genes_promoters	chr8:110168699
chr5	118757512	118757512	1	*	76.1209012375306	chr5	118757235	118759101	1867	+	intron:191994	ENSMUST00000100816.7	76199	Med13l	mm10_genes_introns	chr5:118757512
chr12	109608074	109608074	1	*	61.923129799081536	chr12	109604516	109608515	4000	+	1to5kb:95684	ENSMUST00000238576.1	75745	Rian	mm10_genes_1to5kb	chr12:109608074
chr4	106613981	106613981	1	*	61.63096844716372	chr4	106613503	106615034	1532	-	intron:163281	ENSMUST00000189032.6	242602	Lexm	mm10_genes_introns	chr4:106613981
chr8	105255390	105255390	1	*	-79.81538482245799	chr8	105255154	105256153	1000	-	promoter:69276	ENSMUST00000136822.2	97440	B3gnt9	mm10_genes_promoters	chr8:105255390
chr16	90496228	90496228	1	*	-76.72152205631977	chr16	90496090	90499553	3464	+	exon:698944	ENSMUST00000065856.7	26559	Hunk	mm10_genes_exons	chr16:90496228
chr9	35025345	35025345	1	*	75.37862845397837	chr9	35023653	35028331	4679	+	intron:349347	ENSMUST00000115148.8	67703	Kirrel3	mm10_genes_introns	chr9:35025345
chr7	99563679	99563679	1	*	-67.69574385595091	chr7	99535799	99582260	46462	+	intron:273871	ENSMUST00000098266.8	109689	Arrb1	mm10_genes_introns	chr7:99563679
chr2	26359523	26359523	1	*	-69.26195130586935	chr2	26359364	26359747	384	-	exon:91054	ENSMUST00000100303.9	332579	Card9	mm10_genes_exons	chr2:26359523
chr11	36753457	36753457	1	*	78.5300761163287	chr11	36385329	36864667	479339	-	intron:448578	ENSMUST00000102801.7	23964	Tenm2	mm10_genes_introns	chr11:36753457
chr15	81142353	81142353	1	*	68.86595536421065	chr15	81117653	81156743	39091	-	intron:564812	ENSMUST00000134469.8	223701	Mrtfa	mm10_genes_introns	chr15:81142353
chr11	4267458	4267458	1	*	66.50266158793312	chr11	4266618	4268183	1566	+	intron:420314	ENSMUST00000066283.11	16878	Lif	mm10_genes_introns	chr11:4267458
chr17	36989421	36989421	1	*	60.17386643680216	chr17	36989189	36990188	1000	-	promoter:125668	ENSMUST00000176712.7	240095	H2-M5	mm10_genes_promoters	chr17:36989421
chr8	11438079	11438079	1	*	-76.26041754686437	chr8	11436109	11440108	4000	+	1to5kb:63767	ENSMUST00000146219.1	12827	Col4a2	mm10_genes_1to5kb	chr8:11438079
chr5	23652562	23652562	1	*	66.98073544045009	chr5	23565266	23675719	110454	-	intron:201527	ENSMUST00000196929.4	20817	Srpk2	mm10_genes_introns	chr5:23652562
chr11	34364721	34364721	1	*	-78.1280437652764	chr11	34314946	34401055	86110	+	intron:422792	ENSMUST00000165963.8	574403	Insyn2b	mm10_genes_introns	chr11:34364721
chr11	78825918	78825918	1	*	68.69589800922158	chr11	78825584	78826583	1000	+	promoter:87024	ENSMUST00000147875.8	66274	Lyrm9	mm10_genes_promoters	chr11:78825918
chr19	47414105	47414105	1	*	59.018780276895264	chr19	47411360	47415359	4000	-	1to5kb:134670	ENSMUST00000237828.1	14218	Sh3pxd2a	mm10_genes_1to5kb	chr19:47414105
chrX	7922964	7922964	1	*	-67.13708278769977	chrX	7922908	7924410	1503	+	exon:807472	ENSMUST00000041096.3	30052	Pcsk1n	mm10_genes_exons	chrX:7922964
chr9	21820610	21820610	1	*	-76.32769792876438	chr9	21818916	21822915	4000	-	1to5kb:74605	ENSMUST00000215729.1	319899	Dock6	mm10_genes_1to5kb	chr9:21820610
chr2	105133699	105133699	1	*	-70.62360882335388	chr2	105133402	105133950	549	+	exon:70311	ENSMUST00000145107.1	22431	Wt1	mm10_genes_exons	chr2:105133699
chr10	60570460	60570460	1	*	66.4450559473074	chr10	60534586	60596714	62129	-	intron:408626	ENSMUST00000073242.10	22295	Cdh23	mm10_genes_introns	chr10:60570460
chr4	154341227	154341227	1	*	-68.53656563467361	chr4	154340721	154342137	1417	-	exon:208880	ENSMUST00000030902.12	70673	Prdm16	mm10_genes_exons	chr4:154341227
chr5	24950555	24950555	1	*	-68.15212620288955	chr5	24947639	25021791	74153	-	intron:202036	ENSMUST00000030784.13	108099	Prkag2	mm10_genes_introns	chr5:24950555
chr19	3904873	3904873	1	*	67.08128811739594	chr19	3904422	3905421	1000	-	promoter:132814	ENSMUST00000127308.1	27060	Tcirg1	mm10_genes_promoters	chr19:3904873
chr11	120821045	120821045	1	*	-67.58596613148985	chr11	120820899	120821072	174	-	exon:562085	ENSMUST00000055655.8	14104	Fasn	mm10_genes_exons	chr11:120821045
chrX	10216439	10216439	1	*	76.83850411239706	chrX	10216216	10216453	238	-	5UTR:93287	ENSMUST00000115534.7	19893	Rpgr	mm10_genes_5UTRs	chrX:10216439
chr5	131575307	131575307	1	*	-75.81493579354279	chr5	131533873	131770759	236887	-	intron:217532	ENSMUST00000161226.8	319974	Auts2	mm10_genes_introns	chr5:131575307
chr11	97753531	97753531	1	*	-73.3036174201692	chr11	97752711	97753710	1000	-	promoter:91887	ENSMUST00000152395.1	67480	Cwc25	mm10_genes_promoters	chr11:97753531
chr11	97753542	97753542	1	*	-73.3036174201692	chr11	97752711	97753710	1000	-	promoter:91887	ENSMUST00000152395.1	67480	Cwc25	mm10_genes_promoters	chr11:97753542
chr11	97753555	97753555	1	*	-73.3036174201692	chr11	97752711	97753710	1000	-	promoter:91887	ENSMUST00000152395.1	67480	Cwc25	mm10_genes_promoters	chr11:97753555
chr11	97753561	97753561	1	*	-73.3036174201692	chr11	97752711	97753710	1000	-	promoter:91887	ENSMUST00000152395.1	67480	Cwc25	mm10_genes_promoters	chr11:97753561
chr13	52878841	52878841	1	*	59.51296504195878	chr13	52841065	52887240	46176	-	intron:507815	ENSMUST00000137064.7	11992	Auh	mm10_genes_introns	chr13:52878841
chrX	139871060	139871060	1	*	-63.89609756600842	chrX	139864628	139871069	6442	-	intron:692531	ENSMUST00000033811.13	75746	Morc4	mm10_genes_introns	chrX:139871060
chr11	113780622	113780622	1	*	76.26609386176612	chr11	113776374	113781143	4770	-	exon:558303	ENSMUST00000041627.13	237979	Sdk2	mm10_genes_exons	chr11:113780622
chr4	131842792	131842792	1	*	-75.51699927414981	chr4	131842470	131843469	1000	+	promoter:29146	ENSMUST00000030742.10	26922	Mecr	mm10_genes_promoters	chr4:131842792
chr5	24377793	24377793	1	*	-76.79067369497946	chr5	24377710	24377810	101	+	intron:178017	ENSMUST00000115090.5	18127	Nos3	mm10_genes_introns	chr5:24377793
chr8	111492808	111492808	1	*	66.7562659295173	chr8	111492773	111494247	1475	-	intron:343774	ENSMUST00000038193.14	319481	Wdr59	mm10_genes_introns	chr8:111492808
chr7	25645306	25645306	1	*	-60.53449258453472	chr7	25641827	25658632	16806	-	intron:290009	ENSMUST00000071329.7	12039	Bckdha	mm10_genes_introns	chr7:25645306
chr4	148909240	148909240	1	*	-53.80315616384917	chr4	148901744	148928996	27253	+	intron:152930	ENSMUST00000094464.9	69743	Casz1	mm10_genes_introns	chr4:148909240
chr15	82930105	82930105	1	*	64.23115421902432	chr15	82857285	82963420	106136	-	intron:565443	ENSMUST00000229547.1	21411	Tcf20	mm10_genes_introns	chr15:82930105
chr9	68679309	68679309	1	*	59.89147365172527	chr9	68653973	69196074	542102	+	intron:355713	ENSMUST00000034766.13	19883	Rora	mm10_genes_introns	chr9:68679309
chr8	127186012	127186012	1	*	68.70327684935911	chr8	127161312	127277020	115709	+	intron:331266	ENSMUST00000162309.7	93742	Pard3	mm10_genes_introns	chr8:127186012
chr12	5407570	5407570	1	*	-69.89666481919583	chr12	5406641	5410640	4000	+	1to5kb:93507	ENSMUST00000163627.2	72669	2810032G03Rik	mm10_genes_1to5kb	chr12:5407570
chr15	76698036	76698036	1	*	59.31546732393072	chr15	76697062	76698061	1000	+	promoter:111454	ENSMUST00000228987.1	76282	Gpt	mm10_genes_promoters	chr15:76698036
chr9	21038744	21038744	1	*	-63.59990971842293	chr9	21038638	21039036	399	+	exon:417721	ENSMUST00000019616.5	15898	Icam5	mm10_genes_exons	chr9:21038744
chr2	180048499	180048499	1	*	61.529142502721726	chr2	180042869	180052463	9595	+	intron:71119	ENSMUST00000041126.8	269397	Ss18l1	mm10_genes_introns	chr2:180048499
chr15	99254299	99254299	1	*	-68.86960701920542	chr15	99252962	99256961	4000	-	1to5kb:115060	ENSMUST00000041190.16	51812	Mcrs1	mm10_genes_1to5kb	chr15:99254299
chr7	45353568	45353568	1	*	73.69350878365378	chr7	45353519	45353663	145	-	exon:356461	ENSMUST00000210479.1	76787	Ppfia3	mm10_genes_exons	chr7:45353568
chr6	128365074	128365074	1	*	-67.98003566270523	chr6	128364705	128365704	1000	+	promoter:46669	ENSMUST00000112148.3	14235	Foxm1	mm10_genes_promoters	chr6:128365074
chr8	23073456	23073456	1	*	65.45922048593911	chr8	23065054	23082192	17139	+	intron:316176	ENSMUST00000110688.8	11733	Ank1	mm10_genes_introns	chr8:23073456
chr8	11438303	11438303	1	*	-56.320376472977586	chr8	11436109	11440108	4000	+	1to5kb:63767	ENSMUST00000146219.1	12827	Col4a2	mm10_genes_1to5kb	chr8:11438303
chr12	76325751	76325751	1	*	72.7593536349885	chr12	76324990	76327565	2576	+	intron:476162	ENSMUST00000154078.2	238276	Akap5	mm10_genes_introns	chr12:76325751
chr5	140885288	140885288	1	*	66.65478304006788	chr5	140883206	140887205	4000	-	1to5kb:42748	ENSMUST00000196169.1	108723	Card11	mm10_genes_1to5kb	chr5:140885288
chr7	143089852	143089852	1	*	-65.08086711582035	chr7	143088215	143092214	4000	-	1to5kb:63409	ENSMUST00000150589.7	56843	Trpm5	mm10_genes_1to5kb	chr7:143089852
chr1	152560761	152560761	1	*	-66.6878165391076	chr1	152557588	152571597	14010	-	intron:37518	ENSMUST00000111859.7	19731	Rgl1	mm10_genes_introns	chr1:152560761
chr10	19995834	19995834	1	*	63.83474654525572	chr10	19935075	20000565	65491	+	intron:388434	ENSMUST00000095806.9	26408	Map3k5	mm10_genes_introns	chr10:19995834
chr14	74662865	74662865	1	*	69.45325428750003	chr14	74645189	74705594	60406	+	intron:527503	ENSMUST00000036653.4	15558	Htr2a	mm10_genes_introns	chr14:74662865
chr2	26345267	26345267	1	*	-67.77104583973357	chr2	26345151	26345359	209	+	exon:56889	ENSMUST00000066936.8	67839	Gpsm1	mm10_genes_exons	chr2:26345267
chr19	24272162	24272162	1	*	-65.06965448804499	chr19	24267400	24272346	4947	-	intron:664729	ENSMUST00000081333.10	14297	Fxn	mm10_genes_introns	chr19:24272162
chr14	70555838	70555838	1	*	-75.42595227340449	chr14	70554900	70555899	1000	+	promoter:106820	ENSMUST00000163060.1	15460	Hr	mm10_genes_promoters	chr14:70555838
chr15	102223453	102223453	1	*	-72.15877905213503	chr15	102223331	102223572	242	-	exon:685744	ENSMUST00000001327.10	16421	Itgb7	mm10_genes_exons	chr15:102223453
chrX	56732037	56732037	1	*	-53.90974843502463	chrX	56731129	56732128	1000	+	promoter:135726	ENSMUST00000116596.7	14199	Fhl1	mm10_genes_promoters	chrX:56732037
chr4	128163406	128163406	1	*	54.849741761509584	chr4	128113764	128197201	83438	+	intron:147779	ENSMUST00000129619.7	329942	Csmd2	mm10_genes_introns	chr4:128163406
chr11	50717252	50717252	1	*	-63.11142866340471	chr11	50668151	50737165	69015	+	intron:423919	ENSMUST00000142118.2	216725	Adamts2	mm10_genes_introns	chr11:50717252
chr9	70203801	70203801	1	*	-61.55911209051732	chr9	70202350	70206349	4000	+	1to5kb:72149	ENSMUST00000213863.1	71602	Myo1e	mm10_genes_1to5kb	chr9:70203801
chr4	137540736	137540736	1	*	-65.20680494004021	chr4	137540659	137540809	151	+	exon:179819	ENSMUST00000030547.14	15530	Hspg2	mm10_genes_exons	chr4:137540736
chr5	134285507	134285507	1	*	71.69589184131173	chr5	134283249	134286694	3446	-	intron:217753	ENSMUST00000059042.13	14886	Gtf2i	mm10_genes_introns	chr5:134285507
chr9	75303945	75303945	1	*	-67.89735602823107	chr9	75301288	75305287	4000	+	1to5kb:72338	ENSMUST00000213990.1	14697	Gnb5	mm10_genes_1to5kb	chr9:75303945
chr12	71970723	71970723	1	*	55.28940384115967	chr12	71959913	71971093	11181	+	intron:475191	ENSMUST00000223272.1	208846	Daam1	mm10_genes_introns	chr12:71970723
chr11	6601824	6601824	1	*	65.86857993297212	chr11	6600393	6604392	4000	-	1to5kb:89201	ENSMUST00000177050.7	192950	Nacad	mm10_genes_1to5kb	chr11:6601824
chr18	69380693	69380693	1	*	65.32595888633881	chr18	69349145	69461861	112717	+	intron:638133	ENSMUST00000203002.3	21413	Tcf4	mm10_genes_introns	chr18:69380693
chrX	142966959	142966959	1	*	-64.05171195502177	chrX	142966729	142967728	1000	-	promoter:139641	ENSMUST00000041317.2	56068	Ammecr1	mm10_genes_promoters	chrX:142966959
chr17	24431876	24431876	1	*	65.97382271046983	chr17	24426940	24433132	6193	+	intron:597501	ENSMUST00000234304.1	13177	Eci1	mm10_genes_introns	chr17:24431876
chr17	12307840	12307840	1	*	-64.06778883299711	chr17	12278112	12318497	40386	-	intron:613195	ENSMUST00000233755.1	26407	Map3k4	mm10_genes_introns	chr17:12307840
chr15	81142312	81142312	1	*	69.89049390758994	chr15	81117653	81156743	39091	-	intron:564812	ENSMUST00000134469.8	223701	Mrtfa	mm10_genes_introns	chr15:81142312
chr5	112428633	112428633	1	*	64.1860630899319	chr5	112428571	112436282	7712	-	intron:212600	ENSMUST00000079491.13	56747	Sez6l	mm10_genes_introns	chr5:112428633
chr10	80834689	80834689	1	*	-66.1674580526382	chr10	80832801	80836141	3341	-	exon:496797	ENSMUST00000053986.8	237403	Lingo3	mm10_genes_exons	chr10:80834689
chr11	35217203	35217203	1	*	-62.84572580728609	chr11	35177855	35234836	56982	+	intron:422802	ENSMUST00000069837.3	20564	Slit3	mm10_genes_introns	chr11:35217203
chr10	75031237	75031237	1	*	-56.10033811820738	chr10	75031114	75031361	248	-	exon:493246	ENSMUST00000179546.7	71236	Rsph14	mm10_genes_exons	chr10:75031237
chr13	113816080	113816080	1	*	68.9905885447252	chr13	113794697	113922246	127550	+	intron:502764	ENSMUST00000091201.6	218639	Arl15	mm10_genes_introns	chr13:113816080
chr11	60188233	60188233	1	*	-63.18660786085106	chr11	60185096	60190622	5527	+	exon:511890	ENSMUST00000064190.12	19377	Rai1	mm10_genes_exons	chr11:60188233
chr11	105314542	105314542	1	*	-69.4635042459799	chr11	105292902	105325501	32600	+	intron:439920	ENSMUST00000126931.1	17534	Mrc2	mm10_genes_introns	chr11:105314542
chr16	17506310	17506310	1	*	-68.83059017829325	chr16	17503688	17507687	4000	+	1to5kb:115865	ENSMUST00000023444.10	66863	Lztr1	mm10_genes_1to5kb	chr16:17506310
chr9	40782478	40782478	1	*	59.631536143225894	chr9	40782307	40785319	3013	+	exon:421100	ENSMUST00000034522.7	71566	Clmp	mm10_genes_exons	chr9:40782478
chr11	98723234	98723234	1	*	-62.52483482063308	chr11	98719811	98723810	4000	-	1to5kb:91958	ENSMUST00000141566.1	23989	Med24	mm10_genes_1to5kb	chr11:98723234
chr7	28526368	28526368	1	*	-65.48274751910874	chr7	28423838	28598105	174268	-	intron:291217	ENSMUST00000040531.8	233033	Samd4b	mm10_genes_introns	chr7:28526368
chr5	120697278	120697278	1	*	77.80175092219844	chr5	120696404	120700403	4000	-	1to5kb:41619	ENSMUST00000145174.7	14357	Dtx1	mm10_genes_1to5kb	chr5:120697278
chr8	117343475	117343475	1	*	-62.239338033033434	chr8	117257402	117377074	119673	+	intron:329295	ENSMUST00000166750.8	74440	Cmip	mm10_genes_introns	chr8:117343475
chr17	80391161	80391161	1	*	62.477560329342396	chr17	80381478	80399936	18459	+	intron:611951	ENSMUST00000226013.1	381112	Arhgef33	mm10_genes_introns	chr17:80391161
chr10	80186736	80186736	1	*	-64.35645008914965	chr10	80179891	80186751	6861	+	intron:396613	ENSMUST00000003154.6	13637	Efna2	mm10_genes_introns	chr10:80186736
chr16	50315613	50315613	1	*	-67.77963530107486	chr16	50280540	50331028	50489	-	intron:590365	ENSMUST00000138166.7	70508	Bbx	mm10_genes_introns	chr16:50315613
chr11	107265371	107265371	1	*	50.014170696762825	chr11	107252118	107296198	44081	-	intron:464779	ENSMUST00000040380.12	71795	Pitpnc1	mm10_genes_introns	chr11:107265371
chr9	98338791	98338791	1	*	64.13654028062592	chr9	98287577	98354018	66442	+	intron:359345	ENSMUST00000134253.7	74080	Nmnat3	mm10_genes_introns	chr9:98338791
chr3	33088486	33088486	1	*	65.83263248571608	chr3	33088329	33088607	279	+	exon:125008	ENSMUST00000125494.1	73874	4930419G24Rik	mm10_genes_exons	chr3:33088486
chr7	49556089	49556089	1	*	-63.923817609761635	chr7	49554260	49556909	2650	+	intron:268505	ENSMUST00000183659.7	78286	Nav2	mm10_genes_introns	chr7:49556089
chr10	90969507	90969507	1	*	-67.78468399059412	chr10	90967006	90973300	6295	+	exon:479625	ENSMUST00000182356.7	77531	Anks1b	mm10_genes_exons	chr10:90969507
chr15	7222978	7222978	1	*	-72.98820926663386	chr15	7222748	7223069	322	-	exon:669441	ENSMUST00000160314.1	268780	Egflam	mm10_genes_exons	chr15:7222978
chr10	121377174	121377174	1	*	61.748334915162964	chr10	121376638	121377637	1000	+	promoter:81095	ENSMUST00000219531.1	75612	Gns	mm10_genes_promoters	chr10:121377174
chr4	138029230	138029230	1	*	52.72907151020695	chr4	137994145	138045342	51198	+	intron:150781	ENSMUST00000139759.7	230861	Eif4g3	mm10_genes_introns	chr4:138029230
chr8	95020615	95020615	1	*	-61.04602458542511	chr8	95019762	95020761	1000	+	promoter:65986	ENSMUST00000211994.1	54672	Adgrg3	mm10_genes_promoters	chr8:95020615
chr13	43094841	43094841	1	*	-54.85891899608433	chr13	43094749	43094996	248	+	exon:596029	ENSMUST00000128646.7	218194	Phactr1	mm10_genes_exons	chr13:43094841
chr16	96014828	96014828	1	*	-76.409963254039	chr16	96012878	96016877	4000	-	1to5kb:119835	ENSMUST00000232794.1	93871	Brwd1	mm10_genes_1to5kb	chr16:96014828
chr15	80332655	80332655	1	*	-46.79949977685553	chr15	80321321	80336634	15314	+	intron:550897	ENSMUST00000160424.7	239556	Cacna1i	mm10_genes_introns	chr15:80332655
chr4	116137621	116137621	1	*	57.80571667897567	chr4	116136755	116137754	1000	+	promoter:28480	ENSMUST00000121052.7	68273	Pomgnt1	mm10_genes_promoters	chr4:116137621
chr4	141244776	141244776	1	*	-75.46193347936246	chr4	141244425	141245424	1000	+	promoter:29659	ENSMUST00000135623.2	213649	Arhgef19	mm10_genes_promoters	chr4:141244776
chr8	127186347	127186347	1	*	-78.34682647587098	chr8	127161312	127277020	115709	+	intron:331266	ENSMUST00000162309.7	93742	Pard3	mm10_genes_introns	chr8:127186347
chr16	87716290	87716290	1	*	61.95365558308785	chr16	87715625	87718806	3182	+	intron:581498	ENSMUST00000026703.5	12013	Bach1	mm10_genes_introns	chr16:87716290
chr7	30435797	30435797	1	*	61.17145892675314	chr7	30435746	30435808	63	-	exon:351354	ENSMUST00000006828.8	11803	Aplp1	mm10_genes_exons	chr7:30435797
chr7	137040817	137040817	1	*	56.915394891488766	chr7	136951405	137085948	134544	+	intron:282492	ENSMUST00000081510.3	17314	Mgmt	mm10_genes_introns	chr7:137040817
chr11	118122020	118122020	1	*	-67.43322739892139	chr11	118121959	118124052	2094	-	intron:467362	ENSMUST00000084803.11	69926	Dnah17	mm10_genes_introns	chr11:118122020
chr2	168704934	168704934	1	*	-71.55323005245333	chr2	168691025	168705122	14098	-	intron:101463	ENSMUST00000109175.8	11981	Atp9a	mm10_genes_introns	chr2:168704934
chr9	29654027	29654027	1	*	-61.37927286308149	chr9	29411641	29962844	551204	-	intron:370194	ENSMUST00000075069.10	235106	Ntm	mm10_genes_introns	chr9:29654027
chr2	136000213	136000213	1	*	-71.35544934780616	chr2	136000134	136000309	176	+	exon:76932	ENSMUST00000110109.7	18798	Plcb4	mm10_genes_exons	chr2:136000213
chr3	122044467	122044467	1	*	67.66885680499067	chr3	122041576	122045575	4000	+	1to5kb:22243	ENSMUST00000132199.7	11304	Abca4	mm10_genes_1to5kb	chr3:122044467
chr3	122044478	122044478	1	*	67.66885680499067	chr3	122041576	122045575	4000	+	1to5kb:22243	ENSMUST00000132199.7	11304	Abca4	mm10_genes_1to5kb	chr3:122044478
chr9	59947449	59947449	1	*	57.27124510544523	chr9	59947313	59947553	241	-	exon:451862	ENSMUST00000130831.7	23958	Nr2e3	mm10_genes_exons	chr9:59947449
chr18	82584406	82584406	1	*	-58.61518974229503	chr18	82584112	82585637	1526	+	exon:768627	ENSMUST00000047865.13	17196	Mbp	mm10_genes_exons	chr18:82584406
chr11	73111767	73111767	1	*	76.11977964722372	chr11	73111746	73111863	118	+	exon:517461	ENSMUST00000102537.9	16407	Itgae	mm10_genes_exons	chr11:73111767
chr5	125023425	125023425	1	*	-60.764981921067964	chr5	125023221	125024220	1000	-	promoter:42004	ENSMUST00000144354.1	20602	Ncor2	mm10_genes_promoters	chr5:125023425
chr10	76903312	76903312	1	*	56.89944740519098	chr10	76892657	76961747	69091	-	intron:411289	ENSMUST00000001148.10	59093	Pcbp3	mm10_genes_introns	chr10:76903312
chr6	53821327	53821327	1	*	-59.824291404958196	chr6	53820831	53821830	1000	-	promoter:48230	ENSMUST00000127748.4	66873	Tril	mm10_genes_promoters	chr6:53821327
chr18	82584412	82584412	1	*	-58.569388801826896	chr18	82584112	82585637	1526	+	exon:768627	ENSMUST00000047865.13	17196	Mbp	mm10_genes_exons	chr18:82584412
chr1	136087459	136087459	1	*	68.0554597354607	chr1	136087439	136088302	864	+	intron:15292	ENSMUST00000160641.7	12292	Cacna1s	mm10_genes_introns	chr1:136087459
chr4	137296693	137296693	1	*	-59.558821088928326	chr4	137296312	137299726	3415	+	exon:179765	ENSMUST00000045747.4	22417	Wnt4	mm10_genes_exons	chr4:137296693
chr8	111826578	111826578	1	*	-71.10733993198915	chr8	111779410	111830869	51460	-	intron:343875	ENSMUST00000034432.6	23837	Cfdp1	mm10_genes_introns	chr8:111826578
chr15	72809880	72809880	1	*	-76.02529907952076	chr15	72805600	72810324	4725	-	exon:674383	ENSMUST00000202826.1	353342	Peg13	mm10_genes_exons	chr15:72809880
chr15	72809891	72809891	1	*	-76.02529907952076	chr15	72805600	72810324	4725	-	exon:674383	ENSMUST00000202826.1	353342	Peg13	mm10_genes_exons	chr15:72809891
chr15	72809896	72809896	1	*	-76.02529907952076	chr15	72805600	72810324	4725	-	exon:674383	ENSMUST00000202826.1	353342	Peg13	mm10_genes_exons	chr15:72809896
chr15	72809925	72809925	1	*	-76.02529907952076	chr15	72805600	72810324	4725	-	exon:674383	ENSMUST00000202826.1	353342	Peg13	mm10_genes_exons	chr15:72809925
chr18	58140824	58140824	1	*	61.2124089557535	chr18	58124342	58148990	24649	-	intron:644718	ENSMUST00000025497.7	14119	Fbn2	mm10_genes_introns	chr18:58140824
chr10	43004509	43004509	1	*	-53.82080252520773	chr10	43004415	43020981	16567	-	intron:407649	ENSMUST00000040275.8	109205	Sobp	mm10_genes_introns	chr10:43004509
chr7	24998812	24998812	1	*	-61.42244494070176	chr7	24998809	24998899	91	-	intron:289552	ENSMUST00000102858.9	232975	Atp1a3	mm10_genes_introns	chr7:24998812
chr11	94564563	94564563	1	*	-66.97706111567221	chr11	94564047	94565046	1000	+	promoter:87505	ENSMUST00000040418.8	12643	Chad	mm10_genes_promoters	chr11:94564563
chr2	156356517	156356517	1	*	-66.70022946981669	chr2	156353310	156365118	11809	+	intron:67479	ENSMUST00000037096.8	70873	Cnbd2	mm10_genes_introns	chr2:156356517
chr12	85638233	85638233	1	*	65.29614873329191	chr12	85631750	85638772	7023	+	intron:478219	ENSMUST00000177587.8	81703	Jdp2	mm10_genes_introns	chr12:85638233
chr10	116288344	116288344	1	*	-51.82438798906579	chr10	116283878	116302107	18230	+	intron:401143	ENSMUST00000217925.1	19263	Ptprb	mm10_genes_introns	chr10:116288344
chr11	5715612	5715612	1	*	-64.8842423757259	chr11	5715455	5715680	226	-	exon:534850	ENSMUST00000149980.1	64660	Mrps24	mm10_genes_exons	chr11:5715612
chr17	66509113	66509113	1	*	67.00030961321121	chr17	66506094	66519347	13254	-	intron:627679	ENSMUST00000167962.1	19328	Rab12	mm10_genes_introns	chr17:66509113
chr19	5742504	5742504	1	*	60.62995159151981	chr19	5738903	5742902	4000	+	1to5kb:130954	ENSMUST00000237280.1	16998	Ltbp3	mm10_genes_1to5kb	chr19:5742504
chr17	57323303	57323303	1	*	-64.28164757376526	chr17	57318743	57324641	5899	+	intron:609133	ENSMUST00000169220.8	22324	Vav1	mm10_genes_introns	chr17:57323303
chrX	134601423	134601423	1	*	-52.405538609865545	chrX	134601126	134602125	1000	-	promoter:139437	ENSMUST00000033621.7	11605	Gla	mm10_genes_promoters	chrX:134601423
chr1	36409248	36409248	1	*	65.07117090948913	chr1	36409142	36409274	133	+	exon:2933	ENSMUST00000179162.6	100534273	Fer1l5	mm10_genes_exons	chr1:36409248
chr11	3353339	3353339	1	*	-69.53680651466095	chr11	3352818	3353817	1000	-	promoter:88973	ENSMUST00000148771.1	16886	Limk2	mm10_genes_promoters	chr11:3353339
chr15	12491051	12491051	1	*	53.37822941929247	chr15	12458300	12592080	133781	-	intron:557193	ENSMUST00000075317.11	68070	Pdzd2	mm10_genes_introns	chr15:12491051
chr3	57515971	57515971	1	*	-59.30226571925641	chr3	57501869	57574822	72954	-	intron:122874	ENSMUST00000029380.13	97064	Wwtr1	mm10_genes_introns	chr3:57515971
chrX	60892705	60892705	1	*	-55.82877431145903	chrX	60891366	60893430	2065	-	exon:825665	ENSMUST00000135107.3	20675	Sox3	mm10_genes_exons	chrX:60892705
chr1	190156634	190156634	1	*	62.2409974076391	chr1	190153524	190160521	6998	-	intron:43351	ENSMUST00000175916.7	19130	Prox1	mm10_genes_introns	chr1:190156634
chrX	109013603	109013603	1	*	-70.44450738930156	chrX	109013405	109014404	1000	-	promoter:139273	ENSMUST00000033597.8	50887	Hmgn5	mm10_genes_promoters	chrX:109013603
chr8	120251929	120251929	1	*	-65.13663199981978	chr8	120230719	120353989	123271	+	intron:329781	ENSMUST00000180448.2	382034	Gse1	mm10_genes_introns	chr8:120251929
chr5	137731904	137731904	1	*	-62.41146631456829	chr5	137729899	137731933	2035	-	exon:262864	ENSMUST00000118326.7	243300	Nyap1	mm10_genes_exons	chr5:137731904
chr14	67232604	67232604	1	*	-69.05106831527887	chr14	67232292	67233291	1000	+	promoter:106742	ENSMUST00000022637.13	13592	Ebf2	mm10_genes_promoters	chr14:67232604
chrX	8892689	8892689	1	*	-67.62042587525136	chrX	8892382	8892757	376	+	5UTR:91367	ENSMUST00000064196.4	102941	B630019K06Rik	mm10_genes_5UTRs	chrX:8892689
chr6	73221452	73221452	1	*	-63.37130717192046	chr6	73212672	73221558	8887	-	intron:247379	ENSMUST00000064948.12	330355	Dnah6	mm10_genes_introns	chr6:73221452
chrX	16910749	16910749	1	*	-73.20075765686617	chrX	16894782	16911385	16604	-	intron:684892	ENSMUST00000040134.7	17986	Ndp	mm10_genes_introns	chrX:16910749
chr14	101819624	101819624	1	*	-56.21429396694071	chr14	101807524	101840871	33348	+	intron:528368	ENSMUST00000100337.9	380928	Lmo7	mm10_genes_introns	chr14:101819624
chr5	125543619	125543619	1	*	-56.51586365945751	chr5	125531994	125622460	90467	+	intron:194295	ENSMUST00000185104.1	208151	Tmem132b	mm10_genes_introns	chr5:125543619
chrX	51018863	51018863	1	*	-49.53332351132224	chrX	51018019	51019018	1000	-	promoter:138242	ENSMUST00000053593.7	72065	Rap2c	mm10_genes_promoters	chrX:51018863
chr12	109033473	109033473	1	*	-68.64684447769385	chr12	109032187	109034351	2165	-	exon:590106	ENSMUST00000209829.1	380785	Begain	mm10_genes_exons	chr12:109033473
chr15	99323299	99323299	1	*	65.3822851768834	chr15	99322881	99323319	439	-	intron:569392	ENSMUST00000081224.13	22379	Fmnl3	mm10_genes_introns	chr15:99323299
chr12	108386759	108386759	1	*	-50.48226221743166	chr12	108371353	108463526	92174	+	intron:480731	ENSMUST00000138456.7	68519	Eml1	mm10_genes_introns	chr12:108386759
chr5	114132334	114132334	1	*	-68.65200816740999	chr5	114129177	114133176	4000	-	1to5kb:41377	ENSMUST00000053657.12	231642	Alkbh2	mm10_genes_1to5kb	chr5:114132334
chr3	14888110	14888110	1	*	55.36862127598506	chr3	14887834	14888566	733	+	exon:123161	ENSMUST00000195520.1	12349	Car2	mm10_genes_exons	chr3:14888110
chr8	120295200	120295200	1	*	-64.37600328654239	chr8	120230719	120353989	123271	+	intron:329781	ENSMUST00000180448.2	382034	Gse1	mm10_genes_introns	chr8:120295200
chr2	170738719	170738719	1	*	-67.79408001623624	chr2	170732189	170800849	68661	+	intron:70182	ENSMUST00000029075.4	76829	Dok5	mm10_genes_introns	chr2:170738719
chr2	165212929	165212929	1	*	-57.18010296256001	chr2	165181460	165234554	53095	-	intron:100324	ENSMUST00000065438.12	104010	Cdh22	mm10_genes_introns	chr2:165212929
chr11	68431019	68431019	1	*	72.41589961613118	chr11	68427121	68431120	4000	+	1to5kb:86185	ENSMUST00000021283.7	320207	Pik3r5	mm10_genes_1to5kb	chr11:68431019
chr7	29391898	29391898	1	*	-65.92810673000403	chr7	29388152	29397150	8999	-	intron:292143	ENSMUST00000085809.10	74206	Sipa1l3	mm10_genes_introns	chr7:29391898
chr8	120266988	120266988	1	*	71.45966650351195	chr8	120230719	120353989	123271	+	intron:329781	ENSMUST00000180448.2	382034	Gse1	mm10_genes_introns	chr8:120266988
chr5	119871109	119871109	1	*	65.1028777443787	chr5	119853621	119871182	17562	+	intron:192090	ENSMUST00000018407.9	21388	Tbx5	mm10_genes_introns	chr5:119871109
chr10	20267164	20267164	1	*	61.64854629877687	chr10	20264501	20268500	4000	+	1to5kb:78399	ENSMUST00000216308.1	17761	Map7	mm10_genes_1to5kb	chr10:20267164
chr13	81029084	81029084	1	*	-62.336831043524874	chr13	80964394	81124589	160196	+	intron:500311	ENSMUST00000181043.7	319983	9330111N05Rik	mm10_genes_introns	chr13:81029084
chr11	44533391	44533391	1	*	-59.25111279665957	chr11	44531385	44542628	11244	+	intron:423065	ENSMUST00000019333.9	74315	Rnf145	mm10_genes_introns	chr11:44533391
chr4	137540706	137540706	1	*	-60.814809621657815	chr4	137540659	137540809	151	+	exon:179819	ENSMUST00000030547.14	15530	Hspg2	mm10_genes_exons	chr4:137540706
chr13	57580189	57580189	1	*	-57.746329313291376	chr13	57556807	57587618	30812	-	intron:508713	ENSMUST00000187852.6	20745	Spock1	mm10_genes_introns	chr13:57580189
chr5	115520673	115520673	1	*	-63.19664073783539	chr5	115506869	115544342	37474	+	intron:190981	ENSMUST00000067268.14	19303	Pxn	mm10_genes_introns	chr5:115520673
chr1	63726300	63726300	1	*	-70.17703645113535	chr1	63725614	63729613	4000	+	1to5kb:1171	ENSMUST00000027103.6	75619	Fastkd2	mm10_genes_1to5kb	chr1:63726300
chr7	19349662	19349662	1	*	-62.18174992768903	chr7	19347173	19351172	4000	+	1to5kb:51822	ENSMUST00000162197.2	13870	Ercc1	mm10_genes_1to5kb	chr7:19349662
chr6	112366833	112366833	1	*	65.81089487329379	chr6	112359637	112374778	15142	-	intron:250818	ENSMUST00000060847.5	243612	Ssu2	mm10_genes_introns	chr6:112366833
chr7	101491192	101491192	1	*	60.10314941643321	chr7	101484631	101494570	9940	+	intron:274702	ENSMUST00000084894.14	207728	Pde2a	mm10_genes_introns	chr7:101491192
chr17	45516876	45516876	1	*	-54.24266263278441	chr17	45516821	45516993	173	+	exon:729621	ENSMUST00000024733.8	224805	Aars2	mm10_genes_exons	chr17:45516876
chr13	57722059	57722059	1	*	-65.69484908303099	chr13	57696156	57907401	211246	-	intron:508715	ENSMUST00000187852.6	20745	Spock1	mm10_genes_introns	chr13:57722059
chr11	66312942	66312942	1	*	-62.789639775452635	chr11	66224993	66375158	150166	-	intron:452995	ENSMUST00000123454.7	380702	Shisa6	mm10_genes_introns	chr11:66312942
chr1	171276801	171276801	1	*	63.73575537356938	chr1	171276106	171276895	790	+	exon:22151	ENSMUST00000064272.9	57370	B4galt3	mm10_genes_exons	chr1:171276801
chrX	101319992	101319992	1	*	-61.7931127084165	chrX	101319419	101321348	1930	+	exon:814642	ENSMUST00000113671.2	245537	Nlgn3	mm10_genes_exons	chrX:101319992
chr18	80680674	80680674	1	*	46.001544117959426	chr18	80667161	80682158	14998	-	intron:646942	ENSMUST00000167977.7	18018	Nfatc1	mm10_genes_introns	chr18:80680674
chr17	35835402	35835402	1	*	-53.3840401933108	chr17	35833921	35836039	2119	-	exon:748536	ENSMUST00000001566.9	22154	Tubb5	mm10_genes_exons	chr17:35835402
chr4	134472497	134472497	1	*	59.15566184785581	chr4	134470840	134472803	1964	+	intron:149857	ENSMUST00000030636.10	16765	Stmn1	mm10_genes_introns	chr4:134472497
chrX	73342574	73342574	1	*	-65.43924193328438	chrX	73341621	73342620	1000	+	promoter:135953	ENSMUST00000033731.3	27081	Zfp275	mm10_genes_promoters	chrX:73342574
chr3	100970077	100970077	1	*	-65.75549550894377	chr3	100969664	100970663	1000	-	promoter:25134	ENSMUST00000076941.11	74044	Ttf2	mm10_genes_promoters	chr3:100970077
chr8	46035632	46035632	1	*	-74.1960478024482	chr8	46035538	46035719	182	-	exon:403748	ENSMUST00000170416.7	102141	Snx25	mm10_genes_exons	chr8:46035632
chr1	36313950	36313950	1	*	-60.961659559361536	chr1	36310992	36314991	4000	+	1to5kb:479	ENSMUST00000147123.7	214855	Arid5a	mm10_genes_1to5kb	chr1:36313950
chr18	78259959	78259959	1	*	-64.29152963810665	chr18	78209106	78326348	117243	-	intron:646831	ENSMUST00000237674.1	27411	Slc14a2	mm10_genes_introns	chr18:78259959
chr19	47425332	47425332	1	*	-68.94239386804215	chr19	47424571	47464063	39493	-	intron:669253	ENSMUST00000081619.9	14218	Sh3pxd2a	mm10_genes_introns	chr19:47425332
chr17	46477121	46477121	1	*	67.28424429162538	chr17	46477013	46477447	435	-	intron:624840	ENSMUST00000047034.8	106763	Ttbk1	mm10_genes_introns	chr17:46477121
chr10	64058452	64058452	1	*	68.14636204772685	chr10	63852826	64250697	397872	+	intron:392469	ENSMUST00000105441.7	216033	Ctnna3	mm10_genes_introns	chr10:64058452
chr2	83753060	83753060	1	*	-61.57335854225659	chr2	83747945	83755805	7861	+	intron:56208	ENSMUST00000125360.7	16410	Itgav	mm10_genes_introns	chr2:83753060
chr3	146149585	146149585	1	*	-46.81737451209384	chr3	146148833	146149832	1000	+	promoter:22808	ENSMUST00000011152.13	68279	Mcoln2	mm10_genes_promoters	chr3:146149585
chr17	28682716	28682716	1	*	-63.395658587305846	chr17	28676204	28684706	8503	-	intron:618989	ENSMUST00000114764.7	224661	Slc26a8	mm10_genes_introns	chr17:28682716
chr4	148892949	148892949	1	*	-57.149705141875316	chr4	148890377	148901704	11328	+	intron:152929	ENSMUST00000094464.9	69743	Casz1	mm10_genes_introns	chr4:148892949
chr4	124805817	124805817	1	*	-61.43340588499998	chr4	124805116	124820204	15089	+	intron:147220	ENSMUST00000106193.7	17764	Mtf1	mm10_genes_introns	chr4:124805817
chrX	48343530	48343530	1	*	-72.57083944032058	chrX	48342770	48343769	1000	+	promoter:135607	ENSMUST00000037596.12	320376	Bcorl1	mm10_genes_promoters	chrX:48343530
chr9	99412893	99412893	1	*	48.58249066304584	chr9	99411603	99436309	24707	-	intron:380666	ENSMUST00000035045.14	17532	Mras	mm10_genes_introns	chr9:99412893
chr3	87093634	87093634	1	*	-71.88943773596789	chr3	87092263	87095636	3374	-	intron:125058	ENSMUST00000159976.7	170643	Kirrel	mm10_genes_introns	chr3:87093634
chr3	152569346	152569346	1	*	-63.61388244566086	chr3	152533446	152615857	82412	-	intron:134658	ENSMUST00000045262.10	229949	Ak5	mm10_genes_introns	chr3:152569346
chrX	85574229	85574229	1	*	43.09425243075196	chrX	85574034	85574322	289	+	5UTR:92037	ENSMUST00000137438.1	66724	Tab3	mm10_genes_5UTRs	chrX:85574229
chr11	118575482	118575482	1	*	-62.71395129563931	chr11	118513405	118670648	157244	-	intron:467729	ENSMUST00000117731.7	52897	Rbfox3	mm10_genes_introns	chr11:118575482
chr4	34960949	34960949	1	*	63.74187101839346	chr4	34954048	34985915	31868	-	intron:156982	ENSMUST00000102975.9	214944	Mob3b	mm10_genes_introns	chr4:34960949
chr6	30239677	30239677	1	*	68.6409967030857	chr6	30221797	30241371	19575	-	intron:243155	ENSMUST00000102993.9	22214	Ube2h	mm10_genes_introns	chr6:30239677
chr8	13242821	13242821	1	*	-63.20539735822879	chr8	13242519	13243085	567	-	exon:400058	ENSMUST00000166438.1	234072	Adprhl1	mm10_genes_exons	chr8:13242821
chr6	115940852	115940852	1	*	-53.811244572017046	chr6	115939938	115943937	4000	+	1to5kb:46132	ENSMUST00000037831.13	171506	H1f8	mm10_genes_1to5kb	chr6:115940852
chr5	137633851	137633851	1	*	-64.45462710718498	chr5	137633320	137637319	4000	+	1to5kb:38053	ENSMUST00000176871.1	231798	Lrch4	mm10_genes_1to5kb	chr5:137633851
chr10	81596029	81596029	1	*	-62.2501117801908	chr10	81595416	81596415	1000	-	promoter:83418	ENSMUST00000153379.7	114606	Tle6	mm10_genes_promoters	chr10:81596029
chr11	60189648	60189648	1	*	-62.871123848115715	chr11	60185096	60190622	5527	+	exon:511890	ENSMUST00000064190.12	19377	Rai1	mm10_genes_exons	chr11:60189648
chr14	55787873	55787873	1	*	-58.08283434223643	chr14	55786914	55787913	1000	-	promoter:109200	ENSMUST00000228175.1	56532	Ripk3	mm10_genes_promoters	chr14:55787873
chr6	148354650	148354650	1	*	53.228150210888415	chr6	148353656	148354655	1000	+	promoter:47191	ENSMUST00000071745.3	66184	Rps4l	mm10_genes_promoters	chr6:148354650
chr2	164880746	164880746	1	*	-59.16058850015363	chr2	164878933	164882932	4000	+	1to5kb:13504	ENSMUST00000130213.1	228866	Pcif1	mm10_genes_1to5kb	chr2:164880746
chr4	141252507	141252507	1	*	-64.30781628392033	chr4	141251105	141254289	3185	+	intron:152148	ENSMUST00000006618.8	213649	Arhgef19	mm10_genes_introns	chr4:141252507
chr6	83427328	83427328	1	*	-65.00923854360789	chr6	83404825	83441216	36392	-	intron:247963	ENSMUST00000089622.10	194388	Tet3	mm10_genes_introns	chr6:83427328
chr12	82166448	82166448	1	*	68.54255494149632	chr12	82164320	82168319	4000	+	1to5kb:94864	ENSMUST00000220550.1	217692	Sipa1l1	mm10_genes_1to5kb	chr12:82166448
chr8	11227031	11227031	1	*	-62.649357868945884	chr8	11226950	11227141	192	-	exon:399520	ENSMUST00000033898.9	12826	Col4a1	mm10_genes_exons	chr8:11227031
chr10	81031583	81031583	1	*	-57.818801174065584	chr10	81028538	81031700	3163	-	exon:496909	ENSMUST00000117276.9	106947	Slc39a3	mm10_genes_exons	chr10:81031583
chr16	89832676	89832676	1	*	60.0967780486642	chr16	89821982	89833009	11028	-	intron:592168	ENSMUST00000114122.7	21844	Tiam1	mm10_genes_introns	chr16:89832676
chr13	32234223	32234223	1	*	-56.833208983607285	chr13	32227303	32234352	7050	-	intron:505740	ENSMUST00000041859.8	218138	Gmds	mm10_genes_introns	chr13:32234223
chr14	77660784	77660784	1	*	-64.16877267484031	chr14	77637801	77664618	26818	+	intron:527845	ENSMUST00000022589.8	239188	Enox1	mm10_genes_introns	chr14:77660784
chr11	97332746	97332746	1	*	-57.41339915599008	chr11	97332109	97339290	7182	-	exon:552240	ENSMUST00000093942.4	217143	Gpr179	mm10_genes_exons	chr11:97332746
chr1	42651415	42651415	1	*	60.16180532666303	chr1	42651375	42651679	305	-	exon:30385	ENSMUST00000176977.7	66297	Pantr1	mm10_genes_exons	chr1:42651415
chr7	105762453	105762453	1	*	-53.785940964382206	chr7	105758890	105762889	4000	-	1to5kb:61775	ENSMUST00000140959.1	233651	Dchs1	mm10_genes_1to5kb	chr7:105762453
chr7	117618239	117618239	1	*	-66.95215133127459	chr7	117593740	117621919	28180	+	intron:277103	ENSMUST00000160035.7	233781	Xylt1	mm10_genes_introns	chr7:117618239
chr6	72766487	72766487	1	*	-65.38394767434511	chr6	72649204	72788210	139007	-	intron:247255	ENSMUST00000069536.11	21415	Tcf7l1	mm10_genes_introns	chr6:72766487
chr5	139813961	139813961	1	*	67.81893065685877	chr5	139813244	139814243	1000	-	promoter:42696	ENSMUST00000110832.7	231832	Tmem184a	mm10_genes_promoters	chr5:139813961
chr14	67342336	67342336	1	*	63.656670616562835	chr14	67247080	67371692	124613	+	intron:526815	ENSMUST00000022637.13	13592	Ebf2	mm10_genes_introns	chr14:67342336
chr12	100517578	100517578	1	*	-62.9344962056986	chr12	100500231	100520570	20340	-	intron:490704	ENSMUST00000062957.7	104718	Ttc7b	mm10_genes_introns	chr12:100517578
chr15	100715937	100715937	1	*	-60.659313471137175	chr15	100715928	100716514	587	-	exon:685170	ENSMUST00000159715.7	207839	Galnt6	mm10_genes_exons	chr15:100715937
chr12	51047323	51047323	1	*	-63.66638674442454	chr12	51044712	51052539	7828	+	intron:473473	ENSMUST00000218606.1	75494	1700008C04Rik	mm10_genes_introns	chr12:51047323
chr7	110276972	110276972	1	*	-56.682370174608195	chr7	110274802	110279179	4378	+	intron:276272	ENSMUST00000033325.8	20947	Swap70	mm10_genes_introns	chr7:110276972
chr9	50829937	50829937	1	*	-72.00266447260721	chr9	50822716	50842733	20018	+	intron:351968	ENSMUST00000034561.10	102580	Alg9	mm10_genes_introns	chr9:50829937
chr10	93250604	93250604	1	*	-57.731816437270155	chr10	93241786	93265364	23579	+	intron:399400	ENSMUST00000215286.1	237459	Cdk17	mm10_genes_introns	chr10:93250604
chr9	121707240	121707240	1	*	59.33627059820503	chr9	121705329	121709328	4000	+	1to5kb:74009	ENSMUST00000035113.10	26901	Ss18l2	mm10_genes_1to5kb	chr9:121707240
chr4	55033510	55033510	1	*	53.69490741630353	chr4	55023607	55050185	26579	+	intron:139754	ENSMUST00000098070.9	242466	Zfp462	mm10_genes_introns	chr4:55033510
chr3	22113023	22113023	1	*	68.48650630699792	chr3	22109489	22113488	4000	+	1to5kb:19712	ENSMUST00000192328.4	81004	Tbl1xr1	mm10_genes_1to5kb	chr3:22113023
chr5	119687903	119687903	1	*	-62.48144914889533	chr5	119686055	119688223	2169	-	intron:214060	ENSMUST00000135385.1	433944	Tbx3os2	mm10_genes_introns	chr5:119687903
chr12	109586655	109586655	1	*	-64.2276183564627	chr12	109585874	109586873	1000	-	promoter:98193	ENSMUST00000200030.1	100885823	Mir3544	mm10_genes_promoters	chr12:109586655
chr3	122044453	122044453	1	*	63.93773718306826	chr3	122041576	122045575	4000	+	1to5kb:22243	ENSMUST00000132199.7	11304	Abca4	mm10_genes_1to5kb	chr3:122044453
chr8	122269914	122269914	1	*	-58.09522029325499	chr8	122259940	122272650	12711	+	exon:396736	ENSMUST00000187142.2	195209	Zfp469	mm10_genes_exons	chr8:122269914
chr2	163510158	163510158	1	*	57.97200117731354	chr2	163506988	163551576	44589	+	intron:68998	ENSMUST00000143911.7	15378	Hnf4a	mm10_genes_introns	chr2:163510158
chr4	140584546	140584546	1	*	65.4907669368604	chr4	140584344	140585343	1000	-	promoter:33398	ENSMUST00000105798.7	72754	Arhgef10l	mm10_genes_promoters	chr4:140584546
chr18	61641171	61641171	1	*	-68.63388299653421	chr18	61639733	61645162	5430	+	intron:636701	ENSMUST00000183083.7	545261	Bvht	mm10_genes_introns	chr18:61641171
chr11	120493357	120493357	1	*	66.35100875271068	chr11	120491099	120495098	4000	+	1to5kb:88829	ENSMUST00000138874.1	27376	Slc25a10	mm10_genes_1to5kb	chr11:120493357
chr11	113802683	113802683	1	*	-57.109895545272735	chr11	113800269	113803124	2856	-	intron:465525	ENSMUST00000041627.13	237979	Sdk2	mm10_genes_introns	chr11:113802683
chr10	117215510	117215510	1	*	55.66560998976762	chr10	117215221	117215836	616	-	exon:501553	ENSMUST00000218887.1	64050	Yeats4	mm10_genes_exons	chr10:117215510
chr19	16877846	16877846	1	*	-77.66919827654148	chr19	16874806	16878805	4000	-	1to5kb:133860	ENSMUST00000072915.3	14240	Foxb2	mm10_genes_1to5kb	chr19:16877846
chr4	156194410	156194410	1	*	-61.06700642897908	chr4	156185136	156195243	10108	-	intron:175728	ENSMUST00000180572.1	11603	Agrn	mm10_genes_introns	chr4:156194410
chr15	76002641	76002641	1	*	-49.42117012742831	chr15	76001093	76004749	3657	-	exon:675463	ENSMUST00000170153.1	105732	Fam83h	mm10_genes_exons	chr15:76002641
chr12	84211829	84211829	1	*	59.55493172036523	chr12	84174424	84218774	44351	-	intron:489133	ENSMUST00000046266.12	238317	Elmsan1	mm10_genes_introns	chr12:84211829
chr6	90325088	90325088	1	*	-51.54984786565734	chr6	90325075	90325185	111	-	exon:298556	ENSMUST00000070890.5	71797	Chst13	mm10_genes_exons	chr6:90325088
chr13	53285261	53285261	1	*	60.98497211267194	chr13	53146712	53285465	138754	-	intron:507874	ENSMUST00000130235.7	26564	Ror2	mm10_genes_introns	chr13:53285261
chr5	97598751	97598751	1	*	-55.3665603592209	chr5	97545610	97641939	96330	+	intron:187890	ENSMUST00000181724.7	75814	4930467D21Rik	mm10_genes_introns	chr5:97598751
chr18	82558474	82558474	1	*	-58.70417531684981	chr18	82558262	82562261	4000	+	1to5kb:128912	ENSMUST00000150952.1	17196	Mbp	mm10_genes_1to5kb	chr18:82558474
chr7	19006002	19006002	1	*	-52.80199421466192	chr7	19004044	19006777	2734	+	exon:312753	ENSMUST00000053713.4	272359	Irf2bp1	mm10_genes_exons	chr7:19006002
chr10	63072039	63072039	1	*	-58.58365818461229	chr10	63071869	63072047	179	+	exon:471648	ENSMUST00000020266.14	68371	Pbld1	mm10_genes_exons	chr10:63072039
chr7	62419804	62419804	1	*	-53.76399822363974	chr7	62417593	62420139	2547	-	exon:358912	ENSMUST00000094340.3	22652	Mkrn3	mm10_genes_exons	chr7:62419804
chr8	125843592	125843592	1	*	-48.83914182659663	chr8	125840851	125844850	4000	-	1to5kb:69946	ENSMUST00000120589.7	270109	Pcnx2	mm10_genes_1to5kb	chr8:125843592
chr2	170517618	170517618	1	*	-61.62062570189861	chr2	170516691	170518672	1982	+	intron:70163	ENSMUST00000075087.7	109054	Pfdn4	mm10_genes_introns	chr2:170517618
chr6	50378766	50378766	1	*	-52.53133077882084	chr6	50370359	50382789	12431	-	intron:245413	ENSMUST00000114468.8	71720	Osbpl3	mm10_genes_introns	chr6:50378766
chr4	137550855	137550855	1	*	-66.75052874408178	chr4	137550805	137550946	142	+	exon:179837	ENSMUST00000030547.14	15530	Hspg2	mm10_genes_exons	chr4:137550855
chr7	45205094	45205094	1	*	-73.64461041121737	chr7	45204893	45205892	1000	-	promoter:59578	ENSMUST00000121017.4	384619	Ccdc155	mm10_genes_promoters	chr7:45205094
chr12	76595008	76595008	1	*	-50.41089311459841	chr12	76587591	76597725	10135	-	intron:488359	ENSMUST00000021458.12	20741	Sptb	mm10_genes_introns	chr12:76595008
chr11	77859312	77859312	1	*	56.844270252093075	chr11	77859019	77860331	1313	+	exon:519579	ENSMUST00000135375.3	360013	Myo18a	mm10_genes_exons	chr11:77859312
chr6	8770509	8770509	1	*	-52.69533749359958	chr6	8770432	8770540	109	-	5UTR:31715	ENSMUST00000126039.7	15893	Ica1	mm10_genes_5UTRs	chr6:8770509
chr9	121175315	121175315	1	*	58.89260424398098	chr9	121168312	121188217	19906	-	intron:386477	ENSMUST00000171923.7	209012	Ulk4	mm10_genes_introns	chr9:121175315
chr11	107279440	107279440	1	*	-49.69986454468106	chr11	107252118	107296198	44081	-	intron:464779	ENSMUST00000040380.12	71795	Pitpnc1	mm10_genes_introns	chr11:107279440
chr19	41616340	41616340	1	*	53.9867382706108	chr19	41614915	41616664	1750	-	intron:667106	ENSMUST00000169141.7	20562	Slit1	mm10_genes_introns	chr19:41616340
chr5	147323863	147323863	1	*	72.6651354534874	chr5	147323441	147327440	4000	-	1to5kb:42976	ENSMUST00000100433.4	231903	Urad	mm10_genes_1to5kb	chr5:147323863
chr9	120538840	120538840	1	*	-66.28457810199295	chr9	120538818	120539817	1000	+	promoter:73945	ENSMUST00000047687.8	215446	Entpd3	mm10_genes_promoters	chr9:120538840
chr13	113210566	113210566	1	*	-46.40884686726958	chr13	113210144	113213348	3205	+	intron:502742	ENSMUST00000038144.8	71690	Esm1	mm10_genes_introns	chr13:113210566
chr6	50114550	50114550	1	*	-69.94252194355184	chr6	50110465	50143718	33254	+	intron:228549	ENSMUST00000166318.7	56524	Mpp6	mm10_genes_introns	chr6:50114550
chr3	8995040	8995040	1	*	59.28709101445209	chr3	8994891	8998890	4000	-	1to5kb:23109	ENSMUST00000121038.7	21985	Tpd52	mm10_genes_1to5kb	chr3:8995040
chr11	48849711	48849711	1	*	62.23813475399642	chr11	48849478	48851187	1710	+	exon:508722	ENSMUST00000109213.8	94089	Trim7	mm10_genes_exons	chr11:48849711
chr2	156432414	156432414	1	*	57.97799085599298	chr2	156421300	156438584	17285	+	intron:67512	ENSMUST00000103137.9	13821	Epb41l1	mm10_genes_introns	chr2:156432414
chr11	49885875	49885875	1	*	-49.115378758962954	chr11	49883142	49886421	3280	+	exon:509054	ENSMUST00000109179.8	26420	Mapk9	mm10_genes_exons	chr11:49885875
chr6	114862481	114862481	1	*	-61.72977260892798	chr6	114862437	114862755	319	-	intron:251304	ENSMUST00000152710.7	232334	Vgll4	mm10_genes_introns	chr6:114862481
chr8	70131938	70131938	1	*	-62.172461906585276	chr8	70131918	70132008	91	+	exon:385287	ENSMUST00000211898.1	75692	Nr2c2ap	mm10_genes_exons	chr8:70131938
chr12	75952990	75952990	1	*	58.33773103634263	chr12	75952684	75953025	342	+	exon:570433	ENSMUST00000044217.15	319565	Syne2	mm10_genes_exons	chr12:75952990
chr16	90762487	90762487	1	*	-57.84648199095185	chr16	90762428	90766654	4227	-	intron:592375	ENSMUST00000140920.1	207932	Urb1	mm10_genes_introns	chr16:90762487
chr7	122379344	122379344	1	*	-58.10598164633885	chr7	122290545	122424958	134414	+	intron:278583	ENSMUST00000143692.7	18751	Prkcb	mm10_genes_introns	chr7:122379344
chr17	86752790	86752790	1	*	54.35872936520036	chr17	86752700	86753699	1000	+	promoter:123382	ENSMUST00000024954.10	13819	Epas1	mm10_genes_promoters	chr17:86752790
chr8	91626688	91626688	1	*	-54.826794169529755	chr8	91522897	91666281	143385	+	intron:325057	ENSMUST00000069718.14	26383	Fto	mm10_genes_introns	chr8:91626688
chr1	171118721	171118721	1	*	-64.42952498492096	chr1	171116661	171120660	4000	+	1to5kb:3488	ENSMUST00000027959.10	75472	Cfap126	mm10_genes_1to5kb	chr1:171118721
chr2	167993566	167993566	1	*	58.605930238513935	chr2	167992348	167996347	4000	-	1to5kb:19094	ENSMUST00000142702.1	69553	Ripor3	mm10_genes_1to5kb	chr2:167993566
chr17	87379509	87379509	1	*	-66.82848057892572	chr17	87370662	87379848	9187	+	intron:612475	ENSMUST00000041110.11	225049	Ttc7	mm10_genes_introns	chr17:87379509
chr5	150160570	150160570	1	*	46.89275990299811	chr5	150118812	150196562	77751	+	intron:199170	ENSMUST00000200960.3	320365	Fry	mm10_genes_introns	chr5:150160570
chr4	125512501	125512501	1	*	62.886783279163524	chr4	125490946	125623480	132535	+	intron:147367	ENSMUST00000030676.7	14807	Grik3	mm10_genes_introns	chr4:125512501
chr2	4574349	4574349	1	*	-60.97502708024396	chr2	4572440	4586360	13921	+	intron:44398	ENSMUST00000177457.7	209630	Frmd4a	mm10_genes_introns	chr2:4574349
chr6	127016851	127016851	1	*	-62.52479505197189	chr6	127015932	127016993	1062	+	intron:239038	ENSMUST00000000187.6	14177	Fgf6	mm10_genes_introns	chr6:127016851
chr10	128578411	128578411	1	*	56.68460920946428	chr10	128578394	128578599	206	-	exon:503946	ENSMUST00000082059.6	13867	Erbb3	mm10_genes_exons	chr10:128578411
chr10	94377991	94377991	1	*	-73.47500394348872	chr10	94312203	94430522	118320	+	intron:399621	ENSMUST00000147869.1	319880	Tmcc3	mm10_genes_introns	chr10:94377991
chr1	162295658	162295658	1	*	-54.47082773349972	chr1	162295637	162296636	1000	-	promoter:7519	ENSMUST00000159763.7	103967	Dnm3	mm10_genes_promoters	chr1:162295658
chr1	37320506	37320506	1	*	-54.25849022810245	chr1	37300119	37348397	48279	+	intron:2717	ENSMUST00000146676.1	269180	Inpp4a	mm10_genes_introns	chr1:37320506
chr18	34839304	34839304	1	*	-58.59706547324599	chr18	34835589	34839588	4000	+	1to5kb:127576	ENSMUST00000043484.7	225362	Reep2	mm10_genes_1to5kb	chr18:34839304
chr10	62208810	62208810	1	*	-67.47949851402792	chr10	62203266	62231019	27754	-	intron:409552	ENSMUST00000047883.10	70423	Tspan15	mm10_genes_introns	chr10:62208810
chr12	99293762	99293762	1	*	64.12822456277829	chr12	99292279	99296278	4000	-	1to5kb:97877	ENSMUST00000222458.1	71375	Foxn3	mm10_genes_1to5kb	chr12:99293762
chr7	125901151	125901151	1	*	56.851652232949846	chr7	125891731	125910163	18433	-	intron:307702	ENSMUST00000073935.6	269994	Gsg1l	mm10_genes_introns	chr7:125901151
chr9	75404982	75404982	1	*	-57.066682399631794	chr9	75398752	75409201	10450	-	intron:378231	ENSMUST00000168937.7	50772	Mapk6	mm10_genes_introns	chr9:75404982
chr6	30135701	30135701	1	*	-75.34059110702248	chr6	30126360	30151513	25154	+	intron:225159	ENSMUST00000115212.7	18181	Nrf1	mm10_genes_introns	chr6:30135701
chr4	149731178	149731178	1	*	-69.2305155672858	chr4	149730688	149731687	1000	-	promoter:33801	ENSMUST00000139923.1	230917	Tmem201	mm10_genes_promoters	chr4:149731178
chr12	72090680	72090680	1	*	57.79388771728229	chr12	72090111	72093936	3826	+	intron:475276	ENSMUST00000125764.7	104771	Jkamp	mm10_genes_introns	chr12:72090680
chr5	121914170	121914170	1	*	-58.98498597593505	chr5	121898356	121921313	22958	-	intron:214776	ENSMUST00000111752.9	13048	Cux2	mm10_genes_introns	chr5:121914170
chr10	41476196	41476196	1	*	46.07243340408153	chr10	41475314	41476313	1000	+	promoter:78795	ENSMUST00000019967.15	171580	Mical1	mm10_genes_promoters	chr10:41476196
chr5	24474341	24474341	1	*	57.233808603504635	chr5	24474214	24475182	969	+	exon:212852	ENSMUST00000199856.1	213990	Agap3	mm10_genes_exons	chr5:24474341
chr12	111320865	111320865	1	*	-57.955679487698866	chr12	111320089	111320963	875	-	intron:492131	ENSMUST00000041965.4	217866	Cdc42bpb	mm10_genes_introns	chr12:111320865
chr5	142870819	142870819	1	*	-70.57288507766485	chr5	142866946	142872520	5575	-	exon:264226	ENSMUST00000110766.7	231863	Fbxl18	mm10_genes_exons	chr5:142870819
chr5	92393219	92393219	1	*	63.37360767691076	chr5	92393178	92401995	8818	+	intron:187303	ENSMUST00000113083.8	109979	Art3	mm10_genes_introns	chr5:92393219
chr11	73296563	73296563	1	*	-68.56069858786188	chr11	73296542	73296727	186	+	intron:430990	ENSMUST00000049676.2	246788	Trpv3	mm10_genes_introns	chr11:73296563
chr12	31271666	31271666	1	*	-68.51378373166183	chr12	31271656	31275655	4000	+	1to5kb:93991	ENSMUST00000169065.1	16777	Lamb1	mm10_genes_1to5kb	chr12:31271666
chr4	133250210	133250210	1	*	49.482867190400384	chr4	133249849	133250848	1000	+	promoter:29254	ENSMUST00000134895.1	53608	Map3k6	mm10_genes_promoters	chr4:133250210
chr19	32344358	32344358	1	*	50.862688168252866	chr19	32289632	32351944	62313	-	intron:665529	ENSMUST00000099514.9	208449	Sgms1	mm10_genes_introns	chr19:32344358
chr18	61716242	61716242	1	*	-61.616413518981595	chr18	61715011	61718634	3624	-	exon:775178	ENSMUST00000238010.1	17714	Grpel2	mm10_genes_exons	chr18:61716242
chr8	25100829	25100829	1	*	52.30381982769175	chr8	25100216	25101215	1000	+	promoter:64179	ENSMUST00000210072.1	74744	5830408C22Rik	mm10_genes_promoters	chr8:25100829
chr17	57081704	57081704	1	*	-57.437988849202306	chr17	57079440	57083439	4000	-	1to5kb:126340	ENSMUST00000233564.1	70785	Dennd1c	mm10_genes_1to5kb	chr17:57081704
chr9	97627562	97627562	1	*	-67.05744437349739	chr9	97583699	97799347	215649	-	intron:380521	ENSMUST00000035027.12	64085	Clstn2	mm10_genes_introns	chr9:97627562
chr18	57608444	57608444	1	*	62.13798187549617	chr18	57594136	57667234	73099	+	intron:636181	ENSMUST00000079738.9	75444	Ccdc192	mm10_genes_introns	chr18:57608444
chr15	78041260	78041260	1	*	-58.64969588453022	chr15	78013397	78118680	105284	-	intron:563724	ENSMUST00000019290.2	12300	Cacng2	mm10_genes_introns	chr15:78041260
chr17	30883678	30883678	1	*	-71.56245448676955	chr17	30530366	30923585	393220	-	intron:619726	ENSMUST00000235858.1	224671	Btbd9	mm10_genes_introns	chr17:30883678
chr11	95032663	95032663	1	*	-50.61694833667772	chr11	95029577	95033576	4000	-	1to5kb:91722	ENSMUST00000126730.1	18604	Pdk2	mm10_genes_1to5kb	chr11:95032663
chr15	93266426	93266426	1	*	-60.740601464027876	chr15	93261919	93274875	12957	-	intron:567479	ENSMUST00000049484.12	223827	Gxylt1	mm10_genes_introns	chr15:93266426
chr1	165193584	165193584	1	*	-54.780335312886905	chr1	165188335	165194239	5905	-	intron:40004	ENSMUST00000043338.9	108735	Sft2d2	mm10_genes_introns	chr1:165193584
chr11	118615635	118615635	1	*	-56.14763394352027	chr11	118513405	118670648	157244	-	intron:467729	ENSMUST00000117731.7	52897	Rbfox3	mm10_genes_introns	chr11:118615635
chr10	121077157	121077157	1	*	49.81471390065062	chr10	121075355	121082125	6771	+	intron:401762	ENSMUST00000020439.10	24117	Wif1	mm10_genes_introns	chr10:121077157
chr13	43197477	43197477	1	*	-58.43730122581488	chr13	43195245	43201244	6000	-	exon:609225	ENSMUST00000055341.6	328232	Gfod1	mm10_genes_exons	chr13:43197477
chr1	135794273	135794273	1	*	-74.71763346719369	chr1	135783431	135799972	16542	+	intron:15026	ENSMUST00000132795.7	21952	Tnni1	mm10_genes_introns	chr1:135794273
chr10	70967267	70967267	1	*	-62.02091476536155	chr10	70961215	71027897	66683	-	intron:410318	ENSMUST00000143791.7	83675	Bicc1	mm10_genes_introns	chr10:70967267
chr16	90011837	90011837	1	*	-67.55958654286611	chr16	89956108	90066520	110413	-	intron:592210	ENSMUST00000114124.8	21844	Tiam1	mm10_genes_introns	chr16:90011837
chr16	90011842	90011842	1	*	-67.55958654286611	chr16	89956108	90066520	110413	-	intron:592210	ENSMUST00000114124.8	21844	Tiam1	mm10_genes_introns	chr16:90011842
chr16	90011849	90011849	1	*	-67.55958654286611	chr16	89956108	90066520	110413	-	intron:592210	ENSMUST00000114124.8	21844	Tiam1	mm10_genes_introns	chr16:90011849
chr9	75303950	75303950	1	*	-59.36426193052401	chr9	75301288	75305287	4000	+	1to5kb:72338	ENSMUST00000213990.1	14697	Gnb5	mm10_genes_1to5kb	chr9:75303950
chr2	165718483	165718483	1	*	-74.451550393852	chr2	165716129	165724673	8545	+	intron:69611	ENSMUST00000088132.12	14049	Eya2	mm10_genes_introns	chr2:165718483
chrX	10717459	10717459	1	*	-41.44352064016519	chrX	10716468	10717467	1000	+	promoter:135183	ENSMUST00000156321.1	68041	Mid1ip1	mm10_genes_promoters	chrX:10717459
chr7	127904839	127904839	1	*	59.077974568765804	chr7	127903917	127904916	1000	+	promoter:56101	ENSMUST00000206140.1	12041	Bckdk	mm10_genes_promoters	chr7:127904839
chr9	119943787	119943787	1	*	56.506429586132924	chr9	119942695	119943816	1122	+	intron:365684	ENSMUST00000035100.5	74052	Ttc21a	mm10_genes_introns	chr9:119943787
chr10	81239792	81239792	1	*	-43.46799772130351	chr10	81239515	81239933	419	+	intron:397421	ENSMUST00000117798.7	103406	Zfr2	mm10_genes_introns	chr10:81239792
chr1	183397859	183397859	1	*	47.39526255552441	chr1	183397780	183397893	114	+	exon:24967	ENSMUST00000097043.10	21339	Taf1a	mm10_genes_exons	chr1:183397859
chr14	20185867	20185867	1	*	-49.90793796182059	chr14	20182810	20186809	4000	-	1to5kb:107732	ENSMUST00000024011.9	16529	Kcnk5	mm10_genes_1to5kb	chr14:20185867
chr2	33601401	33601401	1	*	61.110986933403	chr2	33569283	33639488	70206	-	intron:78974	ENSMUST00000041730.10	16917	Lmx1b	mm10_genes_introns	chr2:33601401
chr15	101056586	101056586	1	*	74.869918462715	chr15	101055400	101059399	4000	-	1to5kb:115202	ENSMUST00000178140.1	668225	Fignl2	mm10_genes_1to5kb	chr15:101056586
chr1	87293101	87293101	1	*	-61.177266435522036	chr1	87289616	87297628	8013	+	intron:9956	ENSMUST00000118687.7	98363	Efhd1	mm10_genes_introns	chr1:87293101
chr11	97429619	97429619	1	*	60.75364045717109	chr11	97415668	97444183	28516	+	intron:437011	ENSMUST00000121799.7	58996	Arhgap23	mm10_genes_introns	chr11:97429619
chr7	68275107	68275107	1	*	-42.40528421855026	chr7	68274995	68275994	1000	+	promoter:53943	ENSMUST00000153805.7	434197	Fam169b	mm10_genes_promoters	chr7:68275107
chr2	27286764	27286764	1	*	55.2152705272306	chr2	27286525	27288605	2081	-	intron:76908	ENSMUST00000185188.7	22325	Vav2	mm10_genes_introns	chr2:27286764
chr7	25645294	25645294	1	*	-59.94190255057419	chr7	25641827	25658632	16806	-	intron:290009	ENSMUST00000071329.7	12039	Bckdha	mm10_genes_introns	chr7:25645294
chr3	55329765	55329765	1	*	59.020115675304254	chr3	55256212	55380780	124569	+	intron:107252	ENSMUST00000196745.4	13175	Dclk1	mm10_genes_introns	chr3:55329765
chr12	111428056	111428056	1	*	-55.72947016688722	chr12	111427345	111428344	1000	+	promoter:95893	ENSMUST00000222262.1	74190	Exoc3l4	mm10_genes_promoters	chr12:111428056
chr15	98630452	98630452	1	*	-58.2763756119241	chr15	98629840	98630839	1000	+	promoter:112298	ENSMUST00000229223.1	12297	Cacnb3	mm10_genes_promoters	chr15:98630452
chr2	163319634	163319634	1	*	61.73148774602224	chr2	163319378	163320377	1000	+	promoter:13375	ENSMUST00000148599.1	269389	Tox2	mm10_genes_promoters	chr2:163319634
chr5	111419778	111419778	1	*	59.06420292923163	chr5	111417442	111421883	4442	+	exon:226770	ENSMUST00000094463.4	433938	Mn1	mm10_genes_exons	chr5:111419778
chr5	111419788	111419788	1	*	59.06420292923163	chr5	111417442	111421883	4442	+	exon:226770	ENSMUST00000094463.4	433938	Mn1	mm10_genes_exons	chr5:111419788
chr5	111419812	111419812	1	*	59.06420292923163	chr5	111417442	111421883	4442	+	exon:226770	ENSMUST00000094463.4	433938	Mn1	mm10_genes_exons	chr5:111419812
chr6	83162397	83162397	1	*	-68.42959043113628	chr6	83160920	83164919	4000	+	1to5kb:45155	ENSMUST00000077407.11	13191	Dctn1	mm10_genes_1to5kb	chr6:83162397
chr2	163646582	163646582	1	*	-58.25969871411396	chr2	163646132	163650131	4000	-	1to5kb:18856	ENSMUST00000017851.3	26943	Serinc3	mm10_genes_1to5kb	chr2:163646582
chr15	99506096	99506096	1	*	53.038807702575674	chr15	99500298	99510581	10284	-	intron:569488	ENSMUST00000023750.8	72393	Faim2	mm10_genes_introns	chr15:99506096
chr2	167621917	167621917	1	*	-56.9673590814621	chr2	167617978	167631939	13962	-	intron:101224	ENSMUST00000109207.9	66589	Ube2v1	mm10_genes_introns	chr2:167621917
chr1	135794263	135794263	1	*	-55.72797502662438	chr1	135783431	135799972	16542	+	intron:15026	ENSMUST00000132795.7	21952	Tnni1	mm10_genes_introns	chr1:135794263
chr18	80336169	80336169	1	*	-53.37800800971888	chr18	80323171	80340440	17270	-	intron:646908	ENSMUST00000077962.7	240444	Kcng2	mm10_genes_introns	chr18:80336169
chr12	76803251	76803251	1	*	54.89237404233389	chr12	76801835	76805834	4000	-	1to5kb:97350	ENSMUST00000143863.1	104886	Rab15	mm10_genes_1to5kb	chr12:76803251
chrX	139871054	139871054	1	*	-54.73711615084969	chrX	139864628	139871069	6442	-	intron:692531	ENSMUST00000033811.13	75746	Morc4	mm10_genes_introns	chrX:139871054
chr18	35722227	35722227	1	*	-52.51870852994605	chr18	35721492	35722491	1000	-	promoter:129609	ENSMUST00000097618.9	68545	Ecscr	mm10_genes_promoters	chr18:35722227
chr11	90368724	90368724	1	*	59.336654675180846	chr11	90345979	90387785	41807	-	intron:458688	ENSMUST00000004051.7	217082	Hlf	mm10_genes_introns	chr11:90368724
chr18	44801645	44801645	1	*	62.752862724827196	chr18	44759421	44812038	52618	-	intron:644082	ENSMUST00000089874.8	328949	Mcc	mm10_genes_introns	chr18:44801645
chr16	4958060	4958060	1	*	72.90522603628959	chr16	4957763	4958762	1000	-	promoter:117825	ENSMUST00000229017.1	72615	Anks3	mm10_genes_promoters	chr16:4958060
chrX	100775075	100775075	1	*	-58.09995866569386	chrX	100772285	100776284	4000	+	1to5kb:136412	ENSMUST00000151020.7	53310	Dlg3	mm10_genes_1to5kb	chrX:100775075
chr6	120554895	120554895	1	*	-73.08532277791517	chr6	120554796	120554960	165	+	exon:283509	ENSMUST00000204672.1	73505	1700072O05Rik	mm10_genes_exons	chr6:120554895
chr16	10391862	10391862	1	*	-48.44581548506277	chr16	10387239	10394852	7614	-	intron:584425	ENSMUST00000043415.12	70426	Tekt5	mm10_genes_introns	chr16:10391862
chr7	80329956	80329956	1	*	-62.30539692672045	chr7	80329648	80330337	690	-	intron:300141	ENSMUST00000154428.8	101869	Unc45a	mm10_genes_introns	chr7:80329956
chr4	117281166	117281166	1	*	-67.83338710052172	chr4	117278104	117285378	7275	-	intron:165239	ENSMUST00000030439.14	66743	Rnf220	mm10_genes_introns	chr4:117281166
chrX	164258838	164258838	1	*	54.573176181898035	chrX	164258194	164259193	1000	-	promoter:139964	ENSMUST00000112265.8	12169	Bmx	mm10_genes_promoters	chrX:164258838
chr1	75451161	75451161	1	*	50.397779321350455	chr1	75450436	75451413	978	+	exon:10009	ENSMUST00000113577.7	241118	Asic4	mm10_genes_exons	chr1:75451161
chr15	87587608	87587608	1	*	-62.88729057775008	chr15	87544604	87681479	136876	+	intron:552659	ENSMUST00000230414.1	106014	Tafa5	mm10_genes_introns	chr15:87587608
chr13	91940376	91940376	1	*	70.6974612356315	chr13	91919932	91968946	49015	-	intron:512621	ENSMUST00000151408.7	19418	Rasgrf2	mm10_genes_introns	chr13:91940376
chr12	81183890	81183890	1	*	-67.26019053630745	chr12	81179724	81183987	4264	+	intron:476855	ENSMUST00000110347.8	64075	Smoc1	mm10_genes_introns	chr12:81183890
chr4	148909209	148909209	1	*	-48.85954378611174	chr4	148901744	148928996	27253	+	intron:152930	ENSMUST00000094464.9	69743	Casz1	mm10_genes_introns	chr4:148909209
chr4	138629179	138629179	1	*	-60.20345226764937	chr4	138612968	138635714	22747	-	intron:171121	ENSMUST00000105812.9	75718	Vwa5b1	mm10_genes_introns	chr4:138629179
chr16	85083766	85083766	1	*	-64.33844813419651	chr16	85082889	85103205	20317	-	intron:591745	ENSMUST00000227723.1	11820	App	mm10_genes_introns	chr16:85083766
chr14	70622758	70622758	1	*	-59.175955293266846	chr14	70619546	70623545	4000	-	1to5kb:109707	ENSMUST00000228001.1	13829	Dmtn	mm10_genes_1to5kb	chr14:70622758
chr7	141339003	141339003	1	*	-58.568105193925305	chr7	141338004	141339003	1000	+	promoter:56696	ENSMUST00000136736.7	98845	Eps8l2	mm10_genes_promoters	chr7:141339003
chr18	36557714	36557714	1	*	-60.56204382728373	chr18	36554987	36558986	4000	+	1to5kb:127708	ENSMUST00000134146.7	108857	Ankhd1	mm10_genes_1to5kb	chr18:36557714
chr13	43787871	43787871	1	*	-40.57722501938523	chr13	43785468	43797532	12065	+	intron:496529	ENSMUST00000015540.3	12522	Cd83	mm10_genes_introns	chr13:43787871
chr12	26403894	26403894	1	*	-59.763901308576685	chr12	26389576	26405318	15743	-	intron:484789	ENSMUST00000020971.13	108089	Rnf144a	mm10_genes_introns	chr12:26403894
chrX	49797710	49797710	1	*	-70.28582306670921	chrX	49796365	49800364	4000	-	1to5kb:138217	ENSMUST00000072037.12	209268	Igsf1	mm10_genes_1to5kb	chrX:49797710
chr17	45545662	45545662	1	*	70.13620324723654	chr17	45541952	45545954	4003	-	exon:750071	ENSMUST00000180252.2	210573	Tmem151b	mm10_genes_exons	chr17:45545662
chr15	66970374	66970374	1	*	61.65143444461159	chr15	66969641	66970640	1000	-	promoter:113567	ENSMUST00000005256.13	17988	Ndrg1	mm10_genes_promoters	chr15:66970374
chr17	68002901	68002901	1	*	-57.705837358368825	chr17	67901506	68003894	102389	-	intron:627814	ENSMUST00000024840.11	268970	Arhgap28	mm10_genes_introns	chr17:68002901
chr15	99506110	99506110	1	*	53.83664941733228	chr15	99500298	99510581	10284	-	intron:569488	ENSMUST00000023750.8	72393	Faim2	mm10_genes_introns	chr15:99506110
chr11	19013880	19013880	1	*	-72.19649271218287	chr11	19013003	19017002	4000	-	1to5kb:89357	ENSMUST00000118661.7	17268	Meis1	mm10_genes_1to5kb	chr11:19013880
chr16	89832647	89832647	1	*	54.21926862353664	chr16	89821982	89833009	11028	-	intron:592168	ENSMUST00000114122.7	21844	Tiam1	mm10_genes_introns	chr16:89832647
chr8	120440917	120440917	1	*	-53.71836367356665	chr8	120354180	120553583	199404	+	intron:329782	ENSMUST00000180448.2	382034	Gse1	mm10_genes_introns	chr8:120440917
chr5	24377836	24377836	1	*	58.93800380678434	chr5	24377811	24377985	175	+	exon:212573	ENSMUST00000115090.5	18127	Nos3	mm10_genes_exons	chr5:24377836
chrX	142305903	142305903	1	*	47.35430129375962	chrX	142304752	142306294	1543	-	exon:832382	ENSMUST00000134825.2	66240	Kcne1l	mm10_genes_exons	chrX:142305903
chrX	48341228	48341228	1	*	50.18454745161114	chrX	48340358	48341357	1000	+	promoter:135605	ENSMUST00000136348.7	320376	Bcorl1	mm10_genes_promoters	chrX:48341228
chr7	132598313	132598313	1	*	49.6935807413158	chr7	132597817	132599312	1496	-	intron:309953	ENSMUST00000054562.3	20231	Nkx1-2	mm10_genes_introns	chr7:132598313
chr16	89924404	89924404	1	*	62.56081715858806	chr16	89908716	89955935	47220	-	intron:592199	ENSMUST00000163370.7	21844	Tiam1	mm10_genes_introns	chr16:89924404
chr6	120966091	120966091	1	*	-55.305136118635836	chr6	120966054	120966116	63	-	exon:303651	ENSMUST00000238920.1	194401	Mical3	mm10_genes_exons	chr6:120966091
chr10	59898616	59898616	1	*	-60.352779844903836	chr10	59897491	59899302	1812	+	exon:470986	ENSMUST00000147914.7	56709	Dnajb12	mm10_genes_exons	chr10:59898616
chr7	84361561	84361561	1	*	-42.52941165922047	chr7	84361554	84361668	115	-	exon:362051	ENSMUST00000085077.4	11864	Arnt2	mm10_genes_exons	chr7:84361561
chr3	38889683	38889683	1	*	66.48345674975909	chr3	38885942	38889941	4000	+	1to5kb:20097	ENSMUST00000129182.1	329628	Fat4	mm10_genes_1to5kb	chr3:38889683
chr1	164287589	164287589	1	*	-65.25841242933623	chr1	164287507	164287847	341	+	exon:21230	ENSMUST00000027867.6	74895	Ccdc181	mm10_genes_exons	chr1:164287589
chr5	149622976	149622976	1	*	-50.6998217994535	chr5	149620174	149624173	4000	-	1to5kb:43060	ENSMUST00000201877.1	15505	Hsph1	mm10_genes_1to5kb	chr5:149622976
chr1	133312629	133312629	1	*	51.946204705546684	chr1	133309912	133319280	9369	+	intron:14572	ENSMUST00000094557.6	68338	Golt1a	mm10_genes_introns	chr1:133312629
chr18	60932787	60932787	1	*	-52.189329947500475	chr18	60925841	60941286	15446	+	intron:636446	ENSMUST00000102888.9	12322	Camk2a	mm10_genes_introns	chr18:60932787
chr18	64638884	64638884	1	*	-61.09866291089923	chr18	64605401	64660699	55299	-	intron:645870	ENSMUST00000025482.9	54670	Atp8b1	mm10_genes_introns	chr18:64638884
chr10	79937395	79937395	1	*	-54.043571673167044	chr10	79932079	79946484	14406	+	intron:396153	ENSMUST00000019708.11	13496	Arid3a	mm10_genes_introns	chr10:79937395
chr4	139454825	139454825	1	*	-67.0399284483999	chr4	139454058	139455166	1109	+	intron:151405	ENSMUST00000147999.7	69116	Ubr4	mm10_genes_introns	chr4:139454825
chr1	34121621	34121621	1	*	-42.392095259445796	chr1	34121250	34121630	381	+	5UTR:243	ENSMUST00000183006.4	13518	Dst	mm10_genes_5UTRs	chr1:34121621
chr5	65234382	65234382	1	*	-55.55926282019617	chr5	65234207	65239557	5351	+	intron:183975	ENSMUST00000203653.2	213081	Wdr19	mm10_genes_introns	chr5:65234382
chr10	83161832	83161832	1	*	62.42985819195156	chr10	83092155	83190944	98790	+	intron:398241	ENSMUST00000040110.7	58250	Chst11	mm10_genes_introns	chr10:83161832
chr12	81918073	81918073	1	*	-56.38963902080523	chr12	81917643	81918642	1000	+	promoter:94857	ENSMUST00000221675.1	54604	Pcnx	mm10_genes_promoters	chr12:81918073
chr18	35379229	35379229	1	*	53.081127461267656	chr18	35341198	35403325	62128	-	intron:642915	ENSMUST00000237896.1	81500	Sil1	mm10_genes_introns	chr18:35379229
chr9	32392029	32392029	1	*	-54.57972802151636	chr9	32388985	32392984	4000	+	1to5kb:70671	ENSMUST00000172015.2	56379	Kcnj1	mm10_genes_1to5kb	chr9:32392029
chr19	41389690	41389690	1	*	-67.5873749613092	chr19	41386097	41390096	4000	-	1to5kb:134352	ENSMUST00000059672.8	83490	Pik3ap1	mm10_genes_1to5kb	chr19:41389690
chr6	31100235	31100235	1	*	-58.68815641653589	chr6	31093596	31139728	46133	-	intron:243489	ENSMUST00000229711.1	232685	Lncpint	mm10_genes_introns	chr6:31100235
chr6	28481696	28481696	1	*	59.11939252710303	chr6	28475208	28512834	37627	+	intron:224496	ENSMUST00000168362.1	56463	Snd1	mm10_genes_introns	chr6:28481696
chr3	107438529	107438529	1	*	55.49206023412583	chr3	107438303	107439476	1174	-	exon:155282	ENSMUST00000009617.9	99738	Kcnc4	mm10_genes_exons	chr3:107438529
chr7	127906129	127906129	1	*	59.85482721563572	chr7	127902240	127906239	4000	+	1to5kb:56102	ENSMUST00000206068.1	12041	Bckdk	mm10_genes_1to5kb	chr7:127906129
chr7	45121185	45121185	1	*	-63.738454614492355	chr7	45120757	45121756	1000	+	promoter:53323	ENSMUST00000083561.1	387168	Mir150	mm10_genes_promoters	chr7:45121185
chr19	58974918	58974918	1	*	49.560928450060814	chr19	58973356	58975208	1853	-	exon:805885	ENSMUST00000163821.2	71653	Shtn1	mm10_genes_exons	chr19:58974918
chr5	119687571	119687571	1	*	-61.71868267167364	chr5	119686055	119688223	2169	-	intron:214060	ENSMUST00000135385.1	433944	Tbx3os2	mm10_genes_introns	chr5:119687571
chr7	126963582	126963582	1	*	60.447466341091726	chr7	126962743	126966742	4000	+	1to5kb:55941	ENSMUST00000134471.1	233878	Sez6l2	mm10_genes_1to5kb	chr7:126963582
chr10	116940010	116940010	1	*	59.212502917897794	chr10	116939482	116950259	10778	-	intron:417337	ENSMUST00000020375.6	216363	Rab3ip	mm10_genes_introns	chr10:116940010
chr10	117711670	117711670	1	*	54.459025296917844	chr10	117710759	117711758	1000	-	promoter:84151	ENSMUST00000020408.15	17246	Mdm2	mm10_genes_promoters	chr10:117711670
chr17	25136037	25136037	1	*	-53.40380035177543	chr17	25135622	25136621	1000	+	promoter:120794	ENSMUST00000160961.7	26373	Clcn7	mm10_genes_promoters	chr17:25136037
chr2	29250173	29250173	1	*	-61.01499795675521	chr2	29249126	29253125	4000	-	1to5kb:14981	ENSMUST00000183583.7	171171	Ntng2	mm10_genes_1to5kb	chr2:29250173
chr15	84430136	84430136	1	*	56.77159021103761	chr15	84420233	84446998	26766	-	intron:565942	ENSMUST00000080751.8	72301	Shisal1	mm10_genes_introns	chr15:84430136
chr19	58841148	58841148	1	*	-61.923670087069205	chr19	58828339	58860846	32508	-	intron:670968	ENSMUST00000066285.5	73442	Hspa12a	mm10_genes_introns	chr19:58841148
chr8	23073423	23073423	1	*	52.89169069831976	chr8	23065054	23082192	17139	+	intron:316176	ENSMUST00000110688.8	11733	Ank1	mm10_genes_introns	chr8:23073423
chr4	43690065	43690065	1	*	-51.07248483182572	chr4	43690027	43692668	2642	+	exon:165509	ENSMUST00000107865.8	242409	Tmem8b	mm10_genes_exons	chr4:43690065
chr9	119973270	119973270	1	*	57.65097157988357	chr9	119901628	120049278	147651	-	intron:386400	ENSMUST00000177637.1	13051	Cx3cr1	mm10_genes_introns	chr9:119973270
chr6	146486629	146486629	1	*	-54.499648014227	chr6	146476758	146501786	25029	-	intron:257920	ENSMUST00000079573.12	16439	Itpr2	mm10_genes_introns	chr6:146486629
chr5	117593691	117593691	1	*	51.87680612350734	chr5	117555478	117616831	61354	+	intron:191749	ENSMUST00000180430.1	333050	Ksr2	mm10_genes_introns	chr5:117593691
chr11	115807412	115807412	1	*	-55.1490848614719	chr11	115807362	115807838	477	-	intron:466132	ENSMUST00000041684.10	140721	Caskin2	mm10_genes_introns	chr11:115807412
chr4	87778888	87778888	1	*	60.992895109103806	chr4	87774147	87782286	8140	-	intron:162180	ENSMUST00000078090.11	70122	Mllt3	mm10_genes_introns	chr4:87778888
chr3	8993434	8993434	1	*	63.32047114297108	chr3	8989637	8993636	4000	-	1to5kb:23113	ENSMUST00000124956.1	21985	Tpd52	mm10_genes_1to5kb	chr3:8993434
chr5	144258521	144258521	1	*	-64.41330377394598	chr5	144255913	144264008	8096	+	intron:197764	ENSMUST00000110695.7	55950	Bri3	mm10_genes_introns	chr5:144258521
chr18	37685476	37685476	1	*	-42.14664368874554	chr18	37684828	37688827	4000	+	1to5kb:127830	ENSMUST00000195112.1	93700	Pcdhgb2	mm10_genes_1to5kb	chr18:37685476
chr11	88694726	88694726	1	*	53.469267576648136	chr11	88590148	88712437	122290	-	intron:458457	ENSMUST00000107909.7	76626	Msi2	mm10_genes_introns	chr11:88694726
chr10	88349798	88349798	1	*	51.07184937993687	chr10	88344712	88356757	12046	-	intron:414831	ENSMUST00000156097.1	71712	Dram1	mm10_genes_introns	chr10:88349798
chr18	38333122	38333122	1	*	-39.42751516244125	chr18	38333071	38337070	4000	-	1to5kb:129745	ENSMUST00000153291.1	26384	Gnpda1	mm10_genes_1to5kb	chr18:38333122
chr6	134173416	134173416	1	*	-67.97071271113062	chr6	134137418	134222864	85447	+	intron:239482	ENSMUST00000081028.12	14011	Etv6	mm10_genes_introns	chr6:134173416
chr17	35835413	35835413	1	*	-44.96381337068592	chr17	35833921	35836039	2119	-	exon:748536	ENSMUST00000001566.9	22154	Tubb5	mm10_genes_exons	chr17:35835413
chr5	135779988	135779988	1	*	-58.06358431377354	chr5	135779239	135783238	4000	-	1to5kb:42361	ENSMUST00000053906.10	76571	Styxl1	mm10_genes_1to5kb	chr5:135779988
chr10	80253782	80253782	1	*	-55.895924568488866	chr10	80253660	80253783	124	+	exon:476640	ENSMUST00000105364.7	75406	Ndufs7	mm10_genes_exons	chr10:80253782
chr6	91377118	91377118	1	*	59.689089869326665	chr6	91366329	91394408	28080	-	intron:249503	ENSMUST00000032180.6	22421	Wnt7a	mm10_genes_introns	chr6:91377118
chr2	119191689	119191689	1	*	56.41378756431698	chr2	119186416	119208687	22272	-	intron:92421	ENSMUST00000038439.3	69408	Dnajc17	mm10_genes_introns	chr2:119191689
chr7	49924470	49924470	1	*	56.320101158833765	chr7	49917767	49927564	9798	+	intron:268710	ENSMUST00000056442.11	104245	Slc6a5	mm10_genes_introns	chr7:49924470
chr13	68591442	68591442	1	*	-56.35791793771128	chr13	68590221	68591930	1710	+	intron:499248	ENSMUST00000222068.1	69577	Fastkd3	mm10_genes_introns	chr13:68591442
chr17	11973071	11973071	1	*	-46.670012743184415	chr17	11854877	12004044	149168	+	intron:595489	ENSMUST00000191124.6	50873	Prkn	mm10_genes_introns	chr17:11973071
chr5	144919782	144919782	1	*	-47.13408646371119	chr5	144902579	144965500	62922	-	intron:221920	ENSMUST00000110677.7	75788	Smurf1	mm10_genes_introns	chr5:144919782
chr18	76145972	76145972	1	*	57.31162064577657	chr18	76145681	76148564	2884	+	exon:767927	ENSMUST00000058997.14	207259	Zbtb7c	mm10_genes_exons	chr18:76145972
chr7	112825485	112825485	1	*	57.450330335040064	chr7	112759640	112839415	79776	+	intron:276668	ENSMUST00000084705.11	21676	Tead1	mm10_genes_introns	chr7:112825485
chr5	35771204	35771204	1	*	-51.369197403192366	chr5	35758061	35798452	40392	+	intron:182060	ENSMUST00000101280.9	231148	Ablim2	mm10_genes_introns	chr5:35771204
chr12	11151194	11151194	1	*	-49.8247888541313	chr12	11150374	11151373	1000	-	promoter:96276	ENSMUST00000055673.1	238076	Kcns3	mm10_genes_promoters	chr12:11151194
chr8	84145230	84145230	1	*	-60.72608210418397	chr8	84143025	84147024	4000	+	1to5kb:65520	ENSMUST00000143833.7	74666	4930432K21Rik	mm10_genes_1to5kb	chr8:84145230
chr10	68134038	68134038	1	*	-46.289507972783305	chr10	68128994	68134993	6000	-	intron:410186	ENSMUST00000219238.1	71371	Arid5b	mm10_genes_introns	chr10:68134038
chrX	162829008	162829008	1	*	51.7281533694254	chrX	162811596	162829238	17643	-	intron:693945	ENSMUST00000041370.10	353170	Txlng	mm10_genes_introns	chrX:162829008
chr1	152041045	152041045	1	*	55.479117176061465	chr1	152006768	152089931	83164	-	intron:37478	ENSMUST00000187603.6	69399	1700025G04Rik	mm10_genes_introns	chr1:152041045
chr5	148340508	148340508	1	*	54.01143935983443	chr5	148337210	148340535	3326	-	intron:222362	ENSMUST00000048116.14	11987	Slc7a1	mm10_genes_introns	chr5:148340508
chr5	143254296	143254296	1	*	-66.7914034270853	chr5	143249697	143255565	5869	-	exon:264422	ENSMUST00000161448.7	54201	Zfp316	mm10_genes_exons	chr5:143254296
chr11	69516041	69516041	1	*	63.513016327122294	chr11	69515982	69516111	130	-	exon:544254	ENSMUST00000035539.11	327954	Dnah2	mm10_genes_exons	chr11:69516041
chr12	99300299	99300299	1	*	-59.87362261282318	chr12	99291302	99341421	50120	-	intron:490597	ENSMUST00000046859.11	71375	Foxn3	mm10_genes_introns	chr12:99300299
chr11	4105779	4105779	1	*	46.06133377999665	chr11	4104002	4108496	4495	-	intron:445199	ENSMUST00000003681.7	67815	Sec14l2	mm10_genes_introns	chr11:4105779
chr15	94552173	94552173	1	*	-46.351089613036365	chr15	94551949	94553834	1886	+	intron:553638	ENSMUST00000074936.9	266632	Irak4	mm10_genes_introns	chr15:94552173
chr17	44511525	44511525	1	*	-55.170037386013874	chr17	44497244	44638512	141269	-	intron:624086	ENSMUST00000162816.7	12393	Runx2	mm10_genes_introns	chr17:44511525
chr17	86008465	86008465	1	*	54.67314624930617	chr17	86001608	86040291	38684	-	intron:629721	ENSMUST00000234761.1	78586	Srbd1	mm10_genes_introns	chr17:86008465
chr11	118508179	118508179	1	*	-48.452371953631506	chr11	118507354	118508353	1000	-	promoter:93095	ENSMUST00000154746.7	52897	Rbfox3	mm10_genes_promoters	chr11:118508179
chr11	53463602	53463602	1	*	61.53551636367893	chr11	53463223	53464193	971	+	exon:510161	ENSMUST00000109013.8	71774	Shroom1	mm10_genes_exons	chr11:53463602
chr3	88616611	88616611	1	*	60.99903123539736	chr3	88616106	88620105	4000	+	1to5kb:20944	ENSMUST00000029694.13	16800	Arhgef2	mm10_genes_1to5kb	chr3:88616611
chr1	66415593	66415593	1	*	70.10996917037195	chr1	66415111	66416110	1000	+	promoter:1242	ENSMUST00000172886.7	17756	Map2	mm10_genes_promoters	chr1:66415593
chr2	180526969	180526969	1	*	60.79553781860159	chr2	180501132	180538616	37485	+	intron:71278	ENSMUST00000029084.8	18216	Ntsr1	mm10_genes_introns	chr2:180526969
chr19	32225164	32225164	1	*	-68.29934781840021	chr19	32223591	32247993	24403	-	intron:665527	ENSMUST00000099514.9	208449	Sgms1	mm10_genes_introns	chr19:32225164
chr4	105160487	105160487	1	*	51.68442788774361	chr4	105157964	105194802	36839	+	intron:143160	ENSMUST00000064139.7	67916	Plpp3	mm10_genes_introns	chr4:105160487
chr3	30481817	30481817	1	*	-51.749126893703846	chr3	30009898	30509429	499532	-	intron:121182	ENSMUST00000173495.7	14013	Mecom	mm10_genes_introns	chr3:30481817
chr18	77782606	77782606	1	*	49.34762244575304	chr18	77782301	77782869	569	+	exon:768299	ENSMUST00000026495.14	11946	Atp5a1	mm10_genes_exons	chr18:77782606
chr13	30135668	30135668	1	*	48.009366604819995	chr13	30135489	30136488	1000	+	promoter:99397	ENSMUST00000153269.2	218121	Mboat1	mm10_genes_promoters	chr13:30135668
chr11	118048369	118048369	1	*	-65.3250160428417	chr11	118047271	118049867	2597	-	intron:467308	ENSMUST00000084803.11	69926	Dnah17	mm10_genes_introns	chr11:118048369
chr7	117421072	117421072	1	*	57.571346598939435	chr7	117381521	117475491	93971	+	intron:277099	ENSMUST00000160035.7	233781	Xylt1	mm10_genes_introns	chr7:117421072
chr2	126775897	126775897	1	*	-63.76807226065271	chr2	126775867	126777898	2032	-	intron:95171	ENSMUST00000136319.7	75083	Usp50	mm10_genes_introns	chr2:126775897
chr12	28701738	28701738	1	*	63.454432105295226	chr12	28701610	28702609	1000	-	promoter:96588	ENSMUST00000221783.1	217449	Trappc12	mm10_genes_promoters	chr12:28701738
chr19	43516930	43516930	1	*	-59.53645730304121	chr19	43516866	43520865	4000	-	1to5kb:134427	ENSMUST00000133325.7	14718	Got1	mm10_genes_1to5kb	chr19:43516930
chr5	115169128	115169128	1	*	-56.35393118644735	chr5	115168689	115169148	460	-	exon:255115	ENSMUST00000031519.13	29867	Cabp1	mm10_genes_exons	chr5:115169128
chr2	132523505	132523505	1	*	73.32334465755174	chr2	132520407	132523716	3310	+	intron:64060	ENSMUST00000154067.7	70371	1700026D11Rik	mm10_genes_introns	chr2:132523505
chr2	132523545	132523545	1	*	73.32334465755174	chr2	132520407	132523716	3310	+	intron:64060	ENSMUST00000154067.7	70371	1700026D11Rik	mm10_genes_introns	chr2:132523545
chr6	145963439	145963439	1	*	-46.84643625160342	chr6	145961130	145965223	4094	+	exon:287856	ENSMUST00000111702.7	16651	Sspn	mm10_genes_exons	chr6:145963439
chrX	37048639	37048639	1	*	-51.08387988235723	chrX	37047845	37048844	1000	+	promoter:135447	ENSMUST00000060057.1	245381	Sowahd	mm10_genes_promoters	chrX:37048639
chr2	179662612	179662612	1	*	-48.443652962254305	chr2	179444812	179780253	335442	+	intron:71072	ENSMUST00000000314.12	12561	Cdh4	mm10_genes_introns	chr2:179662612
chr7	25081679	25081679	1	*	-56.9367656384999	chr7	25079535	25083492	3958	+	exon:314548	ENSMUST00000179556.1	232976	Zfp574	mm10_genes_exons	chr7:25081679
chr7	45005611	45005611	1	*	-57.26935841976582	chr7	45005405	45005623	219	-	exon:355780	ENSMUST00000211735.1	233208	Scaf1	mm10_genes_exons	chr7:45005611
chr6	18489711	18489711	1	*	-53.90840707412507	chr6	18448470	18501948	53479	-	intron:242079	ENSMUST00000148602.7	30785	Cttnbp2	mm10_genes_introns	chr6:18489711
chr3	63901662	63901662	1	*	56.30186110198929	chr3	63900473	63904472	4000	-	1to5kb:23896	ENSMUST00000177143.7	269437	Plch1	mm10_genes_1to5kb	chr3:63901662
chr10	90969981	90969981	1	*	57.83350015178487	chr10	90969804	90970219	416	+	exon:479555	ENSMUST00000183156.7	77531	Anks1b	mm10_genes_exons	chr10:90969981
chr13	54724417	54724417	1	*	-49.38189766865907	chr13	54724383	54725892	1510	+	intron:497548	ENSMUST00000037145.7	268663	Cdhr2	mm10_genes_introns	chr13:54724417
chr18	80619583	80619583	1	*	-72.31916491517583	chr18	80608026	80635401	27376	-	intron:646936	ENSMUST00000167977.7	18018	Nfatc1	mm10_genes_introns	chr18:80619583
chr15	79512294	79512294	1	*	-64.12501546249155	chr15	79511411	79515410	4000	+	1to5kb:111659	ENSMUST00000010974.8	105785	Kdelr3	mm10_genes_1to5kb	chr15:79512294
chr16	93585521	93585521	1	*	-47.01325022328616	chr16	93585259	93586258	1000	-	promoter:119751	ENSMUST00000232835.1	224440	Setd4	mm10_genes_promoters	chr16:93585521
chrX	56732107	56732107	1	*	-57.21999199285362	chrX	56731129	56732128	1000	+	promoter:135726	ENSMUST00000116596.7	14199	Fhl1	mm10_genes_promoters	chrX:56732107
chr2	32597061	32597061	1	*	-62.39965585451157	chr2	32594709	32598708	4000	+	1to5kb:9921	ENSMUST00000131229.7	50935	St6galnac6	mm10_genes_1to5kb	chr2:32597061
chr11	69399526	69399526	1	*	-48.896077676709524	chr11	69396632	69400631	4000	-	1to5kb:90610	ENSMUST00000134903.1	327951	Cyb5d1	mm10_genes_1to5kb	chr11:69399526
chr4	129962309	129962309	1	*	51.8397029644768	chr4	129961281	129963371	2091	+	intron:148285	ENSMUST00000147634.7	72225	1700003M07Rik	mm10_genes_introns	chr4:129962309
chr17	86330959	86330959	1	*	51.88041671676168	chr17	86168941	86353554	184614	+	intron:612377	ENSMUST00000097275.8	18754	Prkce	mm10_genes_introns	chr17:86330959
chr17	86330982	86330982	1	*	51.88041671676168	chr17	86168941	86353554	184614	+	intron:612377	ENSMUST00000097275.8	18754	Prkce	mm10_genes_introns	chr17:86330982
chr7	143738379	143738379	1	*	61.552324643869994	chr7	143715823	143740269	24447	-	intron:312585	ENSMUST00000119499.7	79196	Osbpl5	mm10_genes_introns	chr7:143738379
chr9	121472257	121472257	1	*	71.28058529861616	chr9	121472237	121473617	1381	+	exon:440020	ENSMUST00000211301.1	67095	Trak1	mm10_genes_exons	chr9:121472257
chr2	31901194	31901194	1	*	-56.62159713046857	chr2	31900606	31903429	2824	+	intron:50637	ENSMUST00000138325.7	23928	Lamc3	mm10_genes_introns	chr2:31901194
chr1	133386190	133386190	1	*	-53.38342706932651	chr1	133385527	133386526	1000	-	promoter:6795	ENSMUST00000145922.1	20668	Sox13	mm10_genes_promoters	chr1:133386190
chr5	139221497	139221497	1	*	-64.74329218246811	chr5	139218678	139222677	4000	+	1to5kb:38190	ENSMUST00000153469.3	77053	Sun1	mm10_genes_1to5kb	chr5:139221497
chr1	136886878	136886878	1	*	-55.502329120089144	chr1	136882412	136890682	8271	-	intron:36363	ENSMUST00000027649.13	26424	Nr5a2	mm10_genes_introns	chr1:136886878
chr17	25374051	25374051	1	*	59.85226738888246	chr17	25373958	25374440	483	+	exon:719193	ENSMUST00000160377.7	26945	Tpsg1	mm10_genes_exons	chr17:25374051
chr16	34815594	34815594	1	*	-59.52386338337583	chr16	34815435	34815602	168	+	exon:694913	ENSMUST00000155268.1	107589	Mylk	mm10_genes_exons	chr16:34815594
chr2	168636770	168636770	1	*	-66.25049597901511	chr2	168634909	168637500	2592	-	intron:101440	ENSMUST00000109175.8	11981	Atp9a	mm10_genes_introns	chr2:168636770
chr10	12664876	12664876	1	*	-57.38164325098665	chr10	12663539	12664946	1408	-	intron:404864	ENSMUST00000076817.4	22288	Utrn	mm10_genes_introns	chr10:12664876
chr4	102861389	102861389	1	*	-58.11857053441438	chr4	102860795	102863661	2867	+	intron:142750	ENSMUST00000097948.8	73094	Sgip1	mm10_genes_introns	chr4:102861389
chr11	119039326	119039326	1	*	61.89296459415188	chr11	119036305	119039519	3215	-	exon:560918	ENSMUST00000026663.7	30951	Cbx8	mm10_genes_exons	chr11:119039326
chr2	25095413	25095413	1	*	57.89598890582166	chr2	25095132	25096131	1000	-	promoter:14600	ENSMUST00000114373.7	241275	Noxa1	mm10_genes_promoters	chr2:25095413
chr13	55523314	55523314	1	*	-48.44163648847787	chr13	55523231	55524111	881	-	exon:611249	ENSMUST00000223944.1	27261	Dok3	mm10_genes_exons	chr13:55523314
chr11	53532164	53532164	1	*	59.47906176545572	chr11	53532117	53534432	2316	+	intron:424510	ENSMUST00000142800.1	20362	Sept8	mm10_genes_introns	chr11:53532164
chr4	24649802	24649802	1	*	53.82297074921036	chr4	24649540	24650266	727	-	exon:187090	ENSMUST00000108218.9	212390	Klhl32	mm10_genes_exons	chr4:24649802
chrX	85776592	85776592	1	*	-62.835124550880494	chrX	85776504	85776624	121	-	5UTR:93934	ENSMUST00000142152.1	14933	Gk	mm10_genes_5UTRs	chrX:85776592
chr5	66748555	66748555	1	*	-44.53824812725344	chr5	66746006	66857882	111877	+	intron:184339	ENSMUST00000201852.3	77569	Limch1	mm10_genes_introns	chr5:66748555
chr8	18740192	18740192	1	*	-63.97040199377086	chr8	18689060	18788238	99179	+	intron:315786	ENSMUST00000039412.14	244329	Mcph1	mm10_genes_introns	chr8:18740192
chr11	76268216	76268216	1	*	52.79401242471948	chr11	76263188	76272375	9188	-	intron:456408	ENSMUST00000021204.3	18230	Nxn	mm10_genes_introns	chr11:76268216
chr15	76188737	76188737	1	*	60.03191971037584	chr15	76188044	76189043	1000	-	promoter:113845	ENSMUST00000165210.7	18810	Plec	mm10_genes_promoters	chr15:76188737
chrX	164419785	164419785	1	*	71.17638535154718	chrX	164418787	164419786	1000	+	promoter:137495	ENSMUST00000208741.1	18700	Piga	mm10_genes_promoters	chrX:164419785
chr8	114793569	114793569	1	*	50.62681896307926	chr8	114712252	115351637	639386	+	intron:329162	ENSMUST00000004756.13	80707	Wwox	mm10_genes_introns	chr8:114793569
chr2	32340497	32340497	1	*	-44.89660341079976	chr2	32340416	32340565	150	-	exon:93226	ENSMUST00000113352.8	13429	Dnm1	mm10_genes_exons	chr2:32340497
chr4	149731203	149731203	1	*	-67.50382225647193	chr4	149730688	149731687	1000	-	promoter:33801	ENSMUST00000139923.1	230917	Tmem201	mm10_genes_promoters	chr4:149731203
chr18	80630282	80630282	1	*	-62.182434683011856	chr18	80608026	80635401	27376	-	intron:646936	ENSMUST00000167977.7	18018	Nfatc1	mm10_genes_introns	chr18:80630282
chr8	120178575	120178575	1	*	-56.74032245156187	chr8	120178467	120182466	4000	-	1to5kb:69655	ENSMUST00000048786.12	436062	Fam92b	mm10_genes_1to5kb	chr8:120178575
chr1	63566560	63566560	1	*	58.312176437687135	chr1	63564209	63566601	2393	+	intron:6292	ENSMUST00000182642.7	23792	Adam23	mm10_genes_introns	chr1:63566560
chr11	5678361	5678361	1	*	50.637697996573074	chr11	5662528	5687290	24763	+	intron:420636	ENSMUST00000109856.7	76389	Ankrd36	mm10_genes_introns	chr11:5678361
chr4	134551337	134551337	1	*	53.331799631285094	chr4	134548085	134551416	3332	-	intron:170399	ENSMUST00000060435.6	74777	Selenon	mm10_genes_introns	chr4:134551337
chr7	19489572	19489572	1	*	47.37071073657965	chr7	19489175	19489607	433	+	intron:261536	ENSMUST00000137613.8	74463	Exoc3l2	mm10_genes_introns	chr7:19489572
chr12	111270899	111270899	1	*	-59.186287735111186	chr12	111270095	111271094	1000	+	promoter:95877	ENSMUST00000021707.7	93835	Amn	mm10_genes_promoters	chr12:111270899
chr3	122838117	122838117	1	*	63.20054027137657	chr3	122835641	122839541	3901	+	intron:116579	ENSMUST00000066728.9	242202	Pde5a	mm10_genes_introns	chr3:122838117
chr3	122135157	122135157	1	*	-45.40122155431481	chr3	122135002	122135264	263	+	exon:138645	ENSMUST00000013995.12	11304	Abca4	mm10_genes_exons	chr3:122135157
chr3	32482498	32482498	1	*	-45.44855437030859	chr3	32482342	32482515	174	-	exon:144851	ENSMUST00000164954.2	100502876	Kcnmb3	mm10_genes_exons	chr3:32482498
chr16	94825407	94825407	1	*	-55.643994567203784	chr16	94762686	94832298	69613	-	intron:593290	ENSMUST00000095873.11	16522	Kcnj6	mm10_genes_introns	chr16:94825407
chr10	121299867	121299867	1	*	-64.99804989096357	chr10	121298036	121302035	4000	-	1to5kb:84244	ENSMUST00000218688.1	74694	Tbc1d30	mm10_genes_1to5kb	chr10:121299867
chr11	106325094	106325094	1	*	-49.681526636025175	chr11	106324726	106326130	1405	-	intron:464260	ENSMUST00000021056.7	110880	Scn4a	mm10_genes_introns	chr11:106325094
chr8	117495145	117495145	1	*	58.89951089492986	chr8	117493291	117497290	4000	+	1to5kb:66558	ENSMUST00000081232.8	234779	Plcg2	mm10_genes_1to5kb	chr8:117495145
chr10	79945998	79945998	1	*	-56.63087617243049	chr10	79945279	79946278	1000	+	promoter:79897	ENSMUST00000135005.1	13496	Arid3a	mm10_genes_promoters	chr10:79945998
chr2	32646889	32646889	1	*	-55.647999070028796	chr2	32645993	32646992	1000	+	promoter:9943	ENSMUST00000139770.1	13805	Eng	mm10_genes_promoters	chr2:32646889
chr14	70555875	70555875	1	*	-69.70474293006687	chr14	70554900	70555899	1000	+	promoter:106820	ENSMUST00000163060.1	15460	Hr	mm10_genes_promoters	chr14:70555875
chr15	97821438	97821438	1	*	56.11455915154896	chr15	97811629	97831358	19730	-	intron:568255	ENSMUST00000079838.13	56233	Hdac7	mm10_genes_introns	chr15:97821438
chr3	135829285	135829285	1	*	-54.98841695633403	chr3	135826691	135849015	22325	+	intron:118016	ENSMUST00000081978.9	67547	Slc39a8	mm10_genes_introns	chr3:135829285
chr2	32959593	32959593	1	*	-58.246775370713124	chr2	32956559	32960558	4000	+	1to5kb:9974	ENSMUST00000126610.1	269261	Rpl12	mm10_genes_1to5kb	chr2:32959593
chr13	57580203	57580203	1	*	-57.93312952004307	chr13	57556807	57587618	30812	-	intron:508713	ENSMUST00000187852.6	20745	Spock1	mm10_genes_introns	chr13:57580203
chr18	9332775	9332775	1	*	-56.10008510230215	chr18	9319572	9332783	13212	-	intron:640861	ENSMUST00000053917.5	67974	Ccny	mm10_genes_introns	chr18:9332775
chr17	57022580	57022580	1	*	-59.87349206192152	chr17	57021051	57022970	1920	-	exon:753203	ENSMUST00000007814.9	16549	Khsrp	mm10_genes_exons	chr17:57022580
chr3	152535548	152535548	1	*	-61.32820320688259	chr3	152533446	152615857	82412	-	intron:134658	ENSMUST00000045262.10	229949	Ak5	mm10_genes_introns	chr3:152535548
chr2	170738727	170738727	1	*	-61.247243565123654	chr2	170732189	170800849	68661	+	intron:70182	ENSMUST00000029075.4	76829	Dok5	mm10_genes_introns	chr2:170738727
chr16	44280457	44280457	1	*	-54.088079892808736	chr16	44273785	44281794	8010	-	intron:589883	ENSMUST00000136381.7	320007	Sidt1	mm10_genes_introns	chr16:44280457
chr2	59779435	59779435	1	*	55.50885202229584	chr2	59778711	59779710	1000	+	promoter:10400	ENSMUST00000136248.1	66860	Tanc1	mm10_genes_promoters	chr2:59779435
chr7	82410798	82410798	1	*	-44.031642738898476	chr7	82379613	82428333	48721	+	intron:271997	ENSMUST00000173287.7	269959	Adamtsl3	mm10_genes_introns	chr7:82410798
chr11	43543262	43543262	1	*	58.32763799690148	chr11	43529460	43556554	27095	+	intron:423029	ENSMUST00000050574.6	380694	Ccnjl	mm10_genes_introns	chr11:43543262
chr10	75135053	75135053	1	*	71.31071771935034	chr10	75131685	75135893	4209	+	intron:394824	ENSMUST00000164107.2	110279	Bcr	mm10_genes_introns	chr10:75135053
chr8	120492577	120492577	1	*	-61.88072190699444	chr8	120354180	120553583	199404	+	intron:329782	ENSMUST00000180448.2	382034	Gse1	mm10_genes_introns	chr8:120492577
chr17	86803135	86803135	1	*	69.95744500726335	chr17	86797307	86805192	7886	+	intron:612412	ENSMUST00000024954.10	13819	Epas1	mm10_genes_introns	chr17:86803135
chr1	171116625	171116625	1	*	-56.44606312295546	chr1	171114097	171125033	10937	+	intron:18481	ENSMUST00000129651.7	75472	Cfap126	mm10_genes_introns	chr1:171116625
chr4	142038769	142038769	1	*	-57.671662326607006	chr4	142037934	142084061	46128	-	intron:172248	ENSMUST00000036572.3	214359	Tmem51	mm10_genes_introns	chr4:142038769
chr16	78266080	78266080	1	*	-58.36015936363337	chr16	78265953	78266952	1000	-	promoter:119412	ENSMUST00000211605.1	100503619	E330011O21Rik	mm10_genes_promoters	chr16:78266080
chr4	134495155	134495155	1	*	-58.38897035393542	chr4	134491697	134495696	4000	+	1to5kb:29335	ENSMUST00000081525.3	71904	Paqr7	mm10_genes_1to5kb	chr4:134495155
chr8	68207358	68207358	1	*	-59.00676464842155	chr8	68207058	68211057	4000	-	1to5kb:68210	ENSMUST00000212960.1	234353	Psd3	mm10_genes_1to5kb	chr8:68207358
chr15	74589004	74589004	1	*	-54.99407192557448	chr15	74588687	74589464	778	+	exon:659761	ENSMUST00000042035.15	107831	Adgrb1	mm10_genes_exons	chr15:74589004
chr4	154328671	154328671	1	*	-53.838435397314385	chr4	154328664	154328833	170	-	exon:208884	ENSMUST00000030902.12	70673	Prdm16	mm10_genes_exons	chr4:154328671
chr13	14617477	14617477	1	*	-54.93394879119526	chr13	14614166	14618165	4000	-	1to5kb:101698	ENSMUST00000220621.1	75398	Mrpl32	mm10_genes_1to5kb	chr13:14617477
chr11	102943772	102943772	1	*	-56.78609224372559	chr11	102939913	102945864	5952	-	intron:463587	ENSMUST00000057849.5	23829	C1ql1	mm10_genes_introns	chr11:102943772
chr8	111979245	111979245	1	*	-48.67691148827413	chr8	111978139	111979298	1160	-	intron:343898	ENSMUST00000034427.11	30947	Adat1	mm10_genes_introns	chr8:111979245
chr19	16457207	16457207	1	*	-57.73982719289512	chr19	16436818	16533712	96895	+	intron:652246	ENSMUST00000025602.3	14675	Gna14	mm10_genes_introns	chr19:16457207
chr1	93826537	93826537	1	*	48.98008379191801	chr1	93825562	93826561	1000	+	promoter:2180	ENSMUST00000141701.1	98314	D2hgdh	mm10_genes_promoters	chr1:93826537
chr19	6415682	6415682	1	*	-46.27275194664685	chr19	6413731	6417730	4000	+	1to5kb:131112	ENSMUST00000113462.7	18190	Nrxn2	mm10_genes_1to5kb	chr19:6415682
chr9	107990163	107990163	1	*	-58.666974924094916	chr9	107986880	107990879	4000	-	1to5kb:77423	ENSMUST00000048568.5	68176	Inka1	mm10_genes_1to5kb	chr9:107990163
chr9	71766762	71766762	1	*	-72.55522230367029	chr9	71726083	71771508	45426	-	intron:377701	ENSMUST00000072899.8	68178	Cgnl1	mm10_genes_introns	chr9:71766762
chr19	6501533	6501533	1	*	46.70604137921832	chr19	6493456	6504874	11419	+	intron:650143	ENSMUST00000113462.7	18190	Nrxn2	mm10_genes_introns	chr19:6501533
chr9	46197553	46197553	1	*	56.98072383628086	chr9	46196094	46198146	2053	+	intron:351357	ENSMUST00000126865.7	70661	Sik3	mm10_genes_introns	chr9:46197553
chr11	68050835	68050835	1	*	-58.34556934468081	chr11	68020999	68109276	88278	+	intron:427732	ENSMUST00000021285.13	55943	Stx8	mm10_genes_introns	chr11:68050835
chr10	90969987	90969987	1	*	50.95691375567788	chr10	90969804	90970219	416	+	exon:479555	ENSMUST00000183156.7	77531	Anks1b	mm10_genes_exons	chr10:90969987
chr1	89644022	89644022	1	*	-65.59429743058284	chr1	89634295	89663660	29366	+	intron:10871	ENSMUST00000027521.14	347722	Agap1	mm10_genes_introns	chr1:89644022
chr7	12928621	12928621	1	*	-65.61073758632439	chr7	12927885	12931072	3188	+	exon:311388	ENSMUST00000045870.4	381845	Rnf225	mm10_genes_exons	chr7:12928621
chr15	103309021	103309021	1	*	48.410486807092525	chr15	103308235	103309656	1422	-	exon:686269	ENSMUST00000079824.5	80910	Gpr84	mm10_genes_exons	chr15:103309021
chr11	117285397	117285397	1	*	65.9171968272446	chr11	117218932	117290397	71466	+	intron:442498	ENSMUST00000093907.10	53860	Sept9	mm10_genes_introns	chr11:117285397
chr5	139455454	139455454	1	*	56.11851464712247	chr5	139455417	139455546	130	-	exon:263484	ENSMUST00000066052.11	73212	3110082I17Rik	mm10_genes_exons	chr5:139455454
chr5	139455463	139455463	1	*	56.11851464712247	chr5	139455417	139455546	130	-	exon:263484	ENSMUST00000066052.11	73212	3110082I17Rik	mm10_genes_exons	chr5:139455463
chr5	139455478	139455478	1	*	56.11851464712247	chr5	139455417	139455546	130	-	exon:263484	ENSMUST00000066052.11	73212	3110082I17Rik	mm10_genes_exons	chr5:139455478
chrX	160502462	160502462	1	*	-64.72664094809078	chrX	160501465	160502464	1000	+	promoter:137416	ENSMUST00000112376.1	110094	Phka2	mm10_genes_promoters	chrX:160502462
chr5	124163627	124163627	1	*	46.96098585110901	chr5	124152720	124216315	63596	-	intron:216155	ENSMUST00000086123.10	19679	Pitpnm2	mm10_genes_introns	chr5:124163627
chr5	139455430	139455430	1	*	56.10074213978892	chr5	139455417	139455546	130	-	exon:263484	ENSMUST00000066052.11	73212	3110082I17Rik	mm10_genes_exons	chr5:139455430
chr13	29370885	29370885	1	*	-62.79674020264567	chr13	29357584	29444007	86424	-	intron:505514	ENSMUST00000140278.7	68916	Cdkal1	mm10_genes_introns	chr13:29370885
chr17	8116553	8116553	1	*	61.5939269601918	chr17	8115445	8116994	1550	-	exon:736682	ENSMUST00000231927.1	100037283	Rnaset2a	mm10_genes_exons	chr17:8116553
chr17	25791390	25791390	1	*	-57.643558374255576	chr17	25791346	25791486	141	-	exon:741570	ENSMUST00000237093.1	214917	Fam173a	mm10_genes_exons	chr17:25791390
chr12	112589496	112589496	1	*	-58.226787783698256	chr12	112589266	112589535	270	+	5UTR:65284	ENSMUST00000220786.1	70435	Inf2	mm10_genes_5UTRs	chr12:112589496
chr5	124247584	124247584	1	*	45.19224773340432	chr5	124216418	124249427	33010	-	intron:216179	ENSMUST00000162812.7	19679	Pitpnm2	mm10_genes_introns	chr5:124247584
chr15	96700884	96700884	1	*	64.49607332651051	chr15	96700731	96704730	4000	-	1to5kb:114867	ENSMUST00000023099.7	67760	Slc38a2	mm10_genes_1to5kb	chr15:96700884
chr6	120466872	120466872	1	*	-66.86433077272082	chr6	120463467	120472091	8625	+	intron:237177	ENSMUST00000204239.2	16172	Il17ra	mm10_genes_introns	chr6:120466872
chr18	89669271	89669271	1	*	-45.4632931846801	chr18	89598792	89769070	170279	-	intron:647514	ENSMUST00000097495.4	623279	Dok6	mm10_genes_introns	chr18:89669271
chr17	12285228	12285228	1	*	40.97803347675916	chr17	12278112	12318497	40386	-	intron:613195	ENSMUST00000233755.1	26407	Map3k4	mm10_genes_introns	chr17:12285228
chr19	48361557	48361557	1	*	-49.67151669695849	chr19	48206798	48398695	191898	+	intron:657095	ENSMUST00000078880.5	66673	Sorcs3	mm10_genes_introns	chr19:48361557
chr3	121481727	121481727	1	*	-61.99623027830559	chr3	121463552	121486261	22710	-	intron:131660	ENSMUST00000039197.8	213603	Slc44a3	mm10_genes_introns	chr3:121481727
chr11	118479986	118479986	1	*	64.2161753057847	chr11	118476122	118480121	4000	+	1to5kb:88714	ENSMUST00000139813.2	217364	Engase	mm10_genes_1to5kb	chr11:118479986
chr5	131717896	131717896	1	*	-50.36561724414251	chr5	131533873	131770759	236887	-	intron:217532	ENSMUST00000161226.8	319974	Auts2	mm10_genes_introns	chr5:131717896
chr9	119661431	119661431	1	*	-55.00667015997487	chr9	119661417	119664780	3364	-	intron:386266	ENSMUST00000084787.5	20264	Scn10a	mm10_genes_introns	chr9:119661431
chr5	89110792	89110792	1	*	-52.87296835274056	chr5	89084719	89122401	37683	+	intron:186960	ENSMUST00000148750.7	54403	Slc4a4	mm10_genes_introns	chr5:89110792
chrX	20425922	20425922	1	*	58.11166161655819	chrX	20425831	20429022	3192	+	intron:672878	ENSMUST00000115384.8	382207	Jade3	mm10_genes_introns	chrX:20425922
chr2	180598249	180598249	1	*	-45.5900905640509	chr2	180597806	180598805	1000	+	promoter:13937	ENSMUST00000141056.7	12841	Col9a3	mm10_genes_promoters	chr2:180598249
chr4	150944185	150944185	1	*	-57.23086168793445	chr4	150934412	150944772	10361	+	intron:153231	ENSMUST00000105672.9	21942	Tnfrsf9	mm10_genes_introns	chr4:150944185
chr7	24474431	24474431	1	*	64.85495463089319	chr7	24474357	24475238	882	+	intron:261932	ENSMUST00000002284.10	18793	Plaur	mm10_genes_introns	chr7:24474431
chr17	46651552	46651552	1	*	-48.367831767318044	chr17	46647851	46651850	4000	+	1to5kb:122537	ENSMUST00000144966.1	66515	Cul7	mm10_genes_1to5kb	chr17:46651552
chr5	66310436	66310436	1	*	-60.291843203739425	chr5	66309194	66310999	1806	-	intron:206324	ENSMUST00000162955.7	11787	Apbb2	mm10_genes_introns	chr5:66310436
chr11	58932457	58932457	1	*	61.29797196453835	chr11	58932288	58933396	1109	-	exon:540789	ENSMUST00000094151.5	108660	Rnf187	mm10_genes_exons	chr11:58932457
chr13	34127670	34127670	1	*	62.769925009706775	chr13	34126748	34128531	1784	-	exon:608160	ENSMUST00000075774.4	73710	Tubb2b	mm10_genes_exons	chr13:34127670
chr11	120186455	120186455	1	*	-49.40091392675605	chr11	120185400	120187751	2352	-	exon:561420	ENSMUST00000155681.1	100042332	2810410L24Rik	mm10_genes_exons	chr11:120186455
chr8	71666126	71666126	1	*	-60.80767808182331	chr8	71666079	71666640	562	-	intron:338481	ENSMUST00000030170.14	382018	Unc13a	mm10_genes_introns	chr8:71666126
chrX	162643334	162643334	1	*	-69.20272489928875	chrX	162643274	162643601	328	-	exon:833812	ENSMUST00000101102.1	194590	Reps2	mm10_genes_exons	chrX:162643334
chr4	46340917	46340917	1	*	64.49401036191642	chr4	46338609	46342608	4000	+	1to5kb:27272	ENSMUST00000095097.2	110805	Foxe1	mm10_genes_1to5kb	chr4:46340917
chr9	110247309	110247309	1	*	54.29045532864121	chr9	110246295	110247390	1096	+	exon:437341	ENSMUST00000035058.9	29873	Cspg5	mm10_genes_exons	chr9:110247309
chr6	22889277	22889277	1	*	55.17009055681827	chr6	22875885	22925829	49945	+	intron:224349	ENSMUST00000090568.6	19283	Ptprz1	mm10_genes_introns	chr6:22889277
chr11	70047397	70047397	1	*	45.960350638425695	chr11	70044589	70047522	2934	+	exon:515430	ENSMUST00000231415.1	13385	Dlg4	mm10_genes_exons	chr11:70047397
chr4	122862829	122862829	1	*	72.37025575725664	chr4	122862623	122863085	463	-	exon:199194	ENSMUST00000150919.1	12331	Cap1	mm10_genes_exons	chr4:122862829
chr7	49525324	49525324	1	*	-54.47132646622039	chr7	49491492	49535893	44402	+	intron:268499	ENSMUST00000183659.7	78286	Nav2	mm10_genes_introns	chr7:49525324
chrX	73342579	73342579	1	*	-58.86575114192721	chrX	73341621	73342620	1000	+	promoter:135953	ENSMUST00000033731.3	27081	Zfp275	mm10_genes_promoters	chrX:73342579
[truncated: 713 more rows]

## Sheet: F1 Hippocampus
seqnames	start	end	width	strand	name	annot.seqnames	annot.start	annot.end	annot.width	annot.strand	annot.id	annot.tx_id	annot.gene_id	annot.symbol	annot.type	chrpos
[truncated: 2,724 more rows]
