# Supplementary material for: Developmental cannabidiol exposure increases anxiety and modifies genome-wide brain DNA methylation in adult female mice
Source: Clin Epigenetics. 2021 Jan 6;13:4. doi: 10.1186/s13148-020-00993-4 (PMC7789000; doi:10.1186/s13148-020-00993-4)
Supplement: Supplementary file 9 — Additional file 9: Complete results returned by the functional enrichment tool ToppFun for lists of DML-containing genes in F0 cerebral cortex, F1 cerebral cortex, and F1 hippocampus. [file 13148_2020_993_MOESM9_ESM.xlsx]

## Sheet: f1_hippocampus
Category	ID	Name	Source	p-value	q-value Bonferroni	q-value FDR B&H	q-value FDR B&Y	Hit Count in Query List	Hit Count in Genome	Hit in Query List
GO: Molecular Function	GO:0046873	metal ion transmembrane transporter activity		3.798E-11	7.544E-8	7.509E-8	6.136E-7	113	630	KCNH7,SLC24A3,TPCN1,SLC24A4,REM1,ANK2,ANK3,SLC6A16,PHPT1,KCNK5,ATP1A1,ATP1A3,SLC4A4,SLC39A11,CACNA1I,CACNA1G,CACNA1A,CACNA1C,CACNA1D,CACNA1E,CACNA1S,CACNG1,SLC11A2,CASQ1,SLC28A1,PDE2A,PDE4D,CACNA2D2,AHNAK,PLCG1,PLCG2,MCOLN2,AKAP6,SLC39A3,SLC39A2,SLC31A1,PRKCE,MCUB,PCSK9,DPP6,SGK2,KCNIP3,KCNIP1,CACNG3,KCNU1,TRPM3,SCN4A,SCN5A,SCN8A,FGF12,FGF13,RASA3,TMEM175,SLC39A4,SLC1A2,SLC1A3,SLC5A5,SLC6A1,SLC6A…
GO: Molecular Function	GO:0005261	cation channel activity		1.132E-10	2.248E-7	7.509E-8	6.136E-7	98	528	KCNH7,SLC24A3,TPCN1,SLC24A4,REM1,ANK2,ANK3,APP,PHPT1,KCNK5,CACNA1I,CACNA1G,CACNA1A,CACNA1C,CACNA1D,CACNA1E,CACNA1S,CACNG1,CASQ1,SHISA9,HTR3B,PDE2A,PDE4D,PIRT,CACNA2D2,AHNAK,PLCG1,PLCG2,CNGA3,MCOLN2,AKAP6,PIEZO1,CNIH3,DLG2,DLG3,MCUB,PCSK9,DPP6,ANO10,SGK2,OTOP1,EPHB2,KCNIP3,KCNIP1,CACNG3,KCNU1,TRPM3,SCN4A,SCN5A,SCN8A,FGF12,FGF13,RASA3,TMEM175,RPH3A,SHANK2,CACNG5,FAM155B,JPH4,OTOP2,ABCC8,GPLD1,CRACR…
GO: Molecular Function	GO:0005216	ion channel activity		1.134E-10	2.253E-7	7.509E-8	6.136E-7	113	641	KCNH7,SLC24A3,TPCN1,SLC24A4,REM1,ANK2,ANK3,APP,PHPT1,KCNK5,CACNA1I,CACNA1G,CACNA1A,CACNA1C,CACNA1D,CACNA1E,CACNA1S,CACNG1,CASQ1,CLIC6,SHISA9,HTR3B,PDE2A,PDE4D,PIRT,CACNA2D2,BEST3,CLCN2,CLCN6,AHNAK,PLCG1,PLCG2,CNGA3,MCOLN2,AKAP6,PIEZO1,PTAFR,CNIH3,DLG2,DLG3,MCUB,PCSK9,DPP6,ANO10,SGK2,OTOP1,EPHB2,KCNIP3,KCNIP1,TMC3,CACNG3,KCNU1,TRPM3,SCN4A,SCN5A,SCN8A,FGF12,FGF13,RASA3,TMEM175,RPH3A,SHANK2,CACNG5,F…
GO: Molecular Function	GO:0008324	cation transmembrane transporter activity		1.860E-10	3.693E-7	7.838E-8	6.405E-7	145	898	KCNH7,SLC24A3,TPCN1,SLC24A4,REM1,ANK2,ANK3,SLC6A16,APP,PHPT1,KCNK5,ATP1A1,ATP1A3,SLC4A4,SLC39A11,CACNA1I,CACNA1G,CACNA1A,CACNA1C,CACNA1D,CACNA1E,CACNA1S,CACNG1,SLC11A2,ATP6V0E1,CASQ1,SHISA9,SLC28A1,HTR3B,PDE2A,PDE4D,PIRT,CACNA2D2,AHNAK,PLCG1,PLCG2,CNGA3,MCOLN2,AKAP6,SLC39A3,SLC39A2,SLC31A1,SLC30A7,PRKCE,PIEZO1,CNIH3,DLG2,DLG3,MCUB,PCSK9,DPP6,ANO10,SGK2,OTOP1,SLC45A2,EPHB2,KCNIP3,KCNIP1,CACNG3,ATP…
GO: Molecular Function	GO:0022890	inorganic cation transmembrane transporter activity		2.824E-10	5.609E-7	7.838E-8	6.405E-7	138	847	KCNH7,SLC24A3,TPCN1,SLC24A4,REM1,ANK2,ANK3,SLC6A16,APP,PHPT1,KCNK5,ATP1A1,ATP1A3,SLC4A4,SLC39A11,CACNA1I,CACNA1G,CACNA1A,CACNA1C,CACNA1D,CACNA1E,CACNA1S,CACNG1,SLC11A2,ATP6V0E1,CASQ1,SHISA9,SLC28A1,HTR3B,PDE2A,PDE4D,PIRT,CACNA2D2,AHNAK,PLCG1,PLCG2,CNGA3,MCOLN2,AKAP6,SLC39A3,SLC39A2,SLC31A1,PRKCE,PIEZO1,CNIH3,DLG2,DLG3,MCUB,PCSK9,DPP6,ANO10,SGK2,OTOP1,SLC45A2,EPHB2,KCNIP3,KCNIP1,CACNG3,ATP8A1,KCNU…
GO: Molecular Function	GO:0015267	channel activity		2.885E-10	5.730E-7	7.838E-8	6.405E-7	120	705	KCNH7,SLC24A3,TPCN1,SLC24A4,REM1,ANK2,ANK3,APP,PHPT1,KCNK5,CACNA1I,CACNA1G,CACNA1A,CACNA1C,CACNA1D,CACNA1E,CACNA1S,CACNG1,CASQ1,CLIC6,SHISA9,HTR3B,PDE2A,PDE4D,PIRT,CACNA2D2,BEST3,NRXN3,CLCN2,CLCN6,NRXN2,AHNAK,PLCG1,PLCG2,CNGA3,MCOLN2,AKAP6,PRKCB,PIEZO1,PTAFR,CNIH3,DLG2,DLG3,MCUB,PCSK9,DPP6,ANO10,SGK2,OTOP1,EPHB2,KCNIP3,KCNIP1,TMC3,CACNG3,KCNU1,TRPM3,SCN4A,SCN5A,SCN8A,FGF12,FGF13,RASA3,TMEM175,RPH…
GO: Molecular Function	GO:0015075	ion transmembrane transporter activity		2.950E-10	5.858E-7	7.838E-8	6.405E-7	175	1150	KCNH7,SLC24A3,TPCN1,SLC24A4,SFXN2,ABCD1,REM1,ANK2,ANK3,SLC25A5,SLC6A16,APP,SLC25A12,PHPT1,KCNK5,ATP1A1,ATP1A3,SLC4A4,ABCC3,SLC39A11,CACNA1I,CACNA1G,CACNA1A,CACNA1C,CACNA1D,CACNA1E,CACNA1S,CACNG1,SLC11A2,ATP6V0E1,CASQ1,CLIC6,SLC7A7,SHISA9,SLC28A1,HTR3B,PDE2A,PDE4D,PIRT,CACNA2D2,PDZK1,BEST3,CLCN2,CLCN6,AHNAK,PLCG1,PLCG2,PLP2,SLC25A23,CNGA3,MCOLN2,AKAP6,SLC25A24,SLC39A3,SLC39A2,SLC31A1,SLC30A7,PRKCE…
GO: Molecular Function	GO:0022803	passive transmembrane transporter activity		3.157E-10	6.271E-7	7.838E-8	6.405E-7	120	706	KCNH7,SLC24A3,TPCN1,SLC24A4,REM1,ANK2,ANK3,APP,PHPT1,KCNK5,CACNA1I,CACNA1G,CACNA1A,CACNA1C,CACNA1D,CACNA1E,CACNA1S,CACNG1,CASQ1,CLIC6,SHISA9,HTR3B,PDE2A,PDE4D,PIRT,CACNA2D2,BEST3,NRXN3,CLCN2,CLCN6,NRXN2,AHNAK,PLCG1,PLCG2,CNGA3,MCOLN2,AKAP6,PRKCB,PIEZO1,PTAFR,CNIH3,DLG2,DLG3,MCUB,PCSK9,DPP6,ANO10,SGK2,OTOP1,EPHB2,KCNIP3,KCNIP1,TMC3,CACNG3,KCNU1,TRPM3,SCN4A,SCN5A,SCN8A,FGF12,FGF13,RASA3,TMEM175,RPH…
GO: Molecular Function	GO:0008092	cytoskeletal protein binding		1.114E-9	2.213E-6	2.458E-7	2.009E-6	162	1061	MAP1B,MAP6,ACTA1,ADORA2A,MTUS1,MICAL3,MOBP,AMPD1,KIF6,VPS18,SHROOM3,ANK1,ANK2,ANK3,ENC1,EPB41L5,GAS7,SPTBN4,ARL3,TNFSF11,SKAP1,ATP1A1,MYH3,MYH10,MYL4,MYLK,MYH13,MYO1D,KIF1A,MYO1E,MYO10,MYO3A,NF2,WASF1,CDK5R2,NPHS1,CACNA1C,CACNA1D,NRAP,CAMK2B,MYO1H,NUMA1,BRSK2,CAPZB,FMNL3,SNTG2,PRKN,CDH1,CDH11,CDH13,MAGI1,PARVB,SSH1,SUN2,LMOD1,JAKMIP1,IQGAP3,CNN3,PHACTR3,DNM3,PRKCE,CTNNA2,CROCC,PHACTR2,TRAF3IP1,MT…
GO: Molecular Function	GO:0015318	inorganic molecular entity transmembrane transporter activity		2.421E-9	4.808E-6	4.808E-7	3.929E-6	164	1089	KCNH7,SLC24A3,TPCN1,SLC24A4,REM1,ANK2,ANK3,SLC6A16,APP,SLC25A12,PHPT1,KCNK5,ATP1A1,ATP1A3,SLC4A4,ABCC3,SLC39A11,CACNA1I,CACNA1G,CACNA1A,CACNA1C,CACNA1D,CACNA1E,CACNA1S,CACNG1,SLC11A2,ATP6V0E1,CASQ1,CLIC6,SLC7A7,SHISA9,SLC28A1,HTR3B,PDE2A,PDE4D,PIRT,CACNA2D2,BEST3,CLCN2,CLCN6,AHNAK,PLCG1,PLCG2,CNGA3,MCOLN2,AKAP6,SLC39A3,SLC39A2,SLC31A1,PRKCE,PIEZO1,PTAFR,CNIH3,DLG2,DLG3,MCUB,PCSK9,DPP6,ANO10,SGK2,…
GO: Molecular Function	GO:0022857	transmembrane transporter activity		5.572E-9	1.107E-5	9.428E-7	7.704E-6	192	1340	ABCA2,KCNH7,ABCA4,SLC24A3,TPCN1,SLC24A4,SFXN2,ABCD1,REM1,ANK2,ANK3,SLC25A5,SLC6A16,APP,SLC25A12,PHPT1,KCNK5,ATP1A1,ATP1A3,SLC4A4,ABCC3,SLC39A11,CACNA1I,CACNA1G,CACNA1A,CACNA1C,CACNA1D,CACNA1E,CACNA1S,CACNG1,SLC11A2,ATP6V0E1,CASQ1,CLIC6,SLC7A7,SHISA9,SLC28A1,HTR3B,PDE2A,PDE4D,PIRT,CACNA2D2,PDZK1,BEST3,NRXN3,CLCN2,CLCN6,NRXN2,AHNAK,PLCG1,PLCG2,PLP2,SLC25A23,CNGA3,MCOLN2,AKAP6,SLC25A24,SLC39A3,SLC39…
GO: Molecular Function	GO:0005215	transporter activity		5.697E-9	1.131E-5	9.428E-7	7.704E-6	211	1505	ABCA2,KCNH7,ABCA4,MB,SLC24A3,TPCN1,GRAMD1B,SLC24A4,OSBPL6,OSBPL9,OSBPL11,SFXN2,ABCD1,REM1,ANK2,ANK3,SLC25A5,SLC6A16,APOD,APP,SLC25A12,PHPT1,KCNK5,ATP1A1,ATP1A3,SLC4A4,ABCC3,SLC39A11,CACNA1I,CACNA1G,CACNA1A,CACNA1C,CACNA1D,CACNA1E,CACNA1S,CACNG1,SLC11A2,ATP6V0E1,NUP98,CASQ1,CLIC6,SLC7A7,SHISA9,SLC28A1,HTR3B,PDE2A,PDE4D,PIRT,CACNA2D2,PDZK1,BEST3,PCTP,KPNA7,NRXN3,CLCN2,CLCN6,NRXN2,AHNAK,PLCG1,PLCG2,…
GO: Molecular Function	GO:0022836	gated channel activity		2.671E-8	5.304E-5	4.080E-6	3.334E-5	86	491	KCNH7,TPCN1,REM1,ANK3,APP,KCNK5,CACNA1I,CACNA1G,CACNA1A,CACNA1C,CACNA1D,CACNA1E,CACNA1S,CACNG1,CLIC6,SHISA9,HTR3B,PDE4D,CACNA2D2,CLCN2,CLCN6,AHNAK,CNGA3,MCOLN2,AKAP6,PIEZO1,PTAFR,CNIH3,DLG2,DLG3,ANO10,EPHB2,KCNIP3,KCNIP1,TMC3,CACNG3,KCNU1,TRPM3,SCN4A,SCN5A,SCN8A,RASA3,RPH3A,NOX1,SHANK2,CACNG5,FAM155B,GABRB1,GABRE,ANO9,JPH4,ABCC8,GRID2,GRIK3,GRIK4,TTYH3,GRIN2C,PARK7,HPCA,KCNH6,FAM155A,SHANK3,PINK1…
GO: Molecular Function	GO:0001067	regulatory region nucleic acid binding		3.201E-8	6.358E-5	4.289E-6	3.504E-5	153	1036	MEIS1,MEIS2,PARP1,AEBP1,ATXN3,MNT,EBF4,AIRE,CITED1,MSX1,PHOX2A,ZBTB10,NCOA1,ZFHX3,MUC1,NPAS4,PRDM1,NEUROD2,NFATC2,NFE2,NFE2L2,NFIB,NFIC,KLF9,NFIX,NFYA,NPAS2,ZBTB7C,NR4A2,RUNX2,OTX1,ZNF827,PRKN,PBX1,PBX3,LRRFIP1,GTF3C5,ZNF462,TAF7L,PITX3,ONECUT2,PRRX1,TBX4,TBX21,HINFP,NCOR2,FOXP4,FEV,TCF7L1,GLIS1,CUX1,PROX1,ZNF646,ZNF536,ZFP42,ZBTB20,SCRT1,SOX7,PURA,ARNT2,DMRT1,NR2E3,FEZF2,GLIS3,EBF1,RFX4,GSC,KLF1…
GO: Molecular Function	GO:0032559	adenyl ribonucleotide binding		3.239E-8	6.433E-5	4.289E-6	3.504E-5	213	1555	ABCA2,ABCA4,ACACB,ACADM,SMC1A,ACTA1,ACTG1,ACVR1,ACVRL1,ADCY9,MAP3K4,MAP3K5,AK4,AKT1,ABCD1,RAD54L,KIF6,TRIB2,FIGNL2,DGKE,ARAF,MAPK15,ASS1,ATP1A1,ATP1A3,AFG1L,TNK1,ABCC3,MYH3,MYH10,MYLK,MYH13,MYO1D,KIF1A,MYO1E,MYO10,FCSK,KSR1,MYO3A,BMPR1B,ACSF3,ATP8B3,NPR1,NPR2,NSF,CAMK2B,MYO1H,NTRK2,ROR1,KSR2,BRSK2,BTAF1,RIPK4,RUNX2,MAP3K6,TTLL8,DGKI,MAP3K13,CDK16,MAGI1,PDE1C,PDE2A,PDE4D,PDGFRB,ENPP1,PEX6,PFKFB1,C…
GO: Molecular Function	GO:0003779	actin binding		4.664E-8	9.264E-5	5.790E-6	4.731E-5	80	451	MAP1B,MICAL3,MOBP,VPS18,SHROOM3,ENC1,GAS7,SPTBN4,TNFSF11,MYH3,MYH10,MYL4,MYLK,MYH13,MYO1D,MYO1E,MYO10,MYO3A,NF2,WASF1,CDK5R2,NRAP,CAMK2B,MYO1H,CAPZB,FMNL3,SNTG2,PRKN,PARVB,SSH1,LMOD1,CNN3,PHACTR3,PRKCE,CTNNA2,CROCC,PHACTR2,MTSS1,AIF1L,ARPC1B,KLHL5,LRPPRC,MYH14,CLMN,EPB41L1,MTSS2,EPS8,LRRK2,FMN1,CAP2,LIMA1,PPP1R9A,FHOD3,ABLIM3,LIMCH1,ABLIM2,MYO16,SPIRE2,SPTB,CLASP2,MYO5C,FGD4,SYNE2,MYO18B,PDLIM2,S…
GO: Molecular Function	GO:0030554	adenyl nucleotide binding		5.680E-8	1.128E-4	6.636E-6	5.422E-5	213	1566	ABCA2,ABCA4,ACACB,ACADM,SMC1A,ACTA1,ACTG1,ACVR1,ACVRL1,ADCY9,MAP3K4,MAP3K5,AK4,AKT1,ABCD1,RAD54L,KIF6,TRIB2,FIGNL2,DGKE,ARAF,MAPK15,ASS1,ATP1A1,ATP1A3,AFG1L,TNK1,ABCC3,MYH3,MYH10,MYLK,MYH13,MYO1D,KIF1A,MYO1E,MYO10,FCSK,KSR1,MYO3A,BMPR1B,ACSF3,ATP8B3,NPR1,NPR2,NSF,CAMK2B,MYO1H,NTRK2,ROR1,KSR2,BRSK2,BTAF1,RIPK4,RUNX2,MAP3K6,TTLL8,DGKI,MAP3K13,CDK16,MAGI1,PDE1C,PDE2A,PDE4D,PDGFRB,ENPP1,PEX6,PFKFB1,C…
GO: Molecular Function	GO:0022839	ion gated channel activity		6.910E-8	1.372E-4	7.624E-6	6.230E-5	83	478	KCNH7,TPCN1,REM1,ANK3,APP,KCNK5,CACNA1I,CACNA1G,CACNA1A,CACNA1C,CACNA1D,CACNA1E,CACNA1S,CACNG1,CLIC6,SHISA9,HTR3B,PDE4D,CACNA2D2,CLCN2,CLCN6,AHNAK,CNGA3,MCOLN2,AKAP6,PTAFR,CNIH3,DLG2,DLG3,ANO10,EPHB2,KCNIP3,KCNIP1,CACNG3,KCNU1,TRPM3,SCN4A,SCN5A,SCN8A,RASA3,RPH3A,NOX1,SHANK2,CACNG5,FAM155B,GABRB1,GABRE,ANO9,JPH4,ABCC8,GRID2,GRIK3,GRIK4,TTYH3,GRIN2C,PARK7,HPCA,KCNH6,FAM155A,SHANK3,PINK1,ITPR1,ITPR2…
GO: Molecular Function	GO:0016301	kinase activity		9.607E-8	1.908E-4	9.617E-6	7.858E-5	218	1621	ACVR1,ACVRL1,ADCY9,MAP3K4,AXIN2,MAP3K5,ADORA1,ADORA2A,HEG1,AK4,AKT1,TRIB2,PIK3R3,DGKE,APP,ARAF,MADD,TNFSF11,MAPK15,RAP2C,TNK1,MYLK,TNFRSF11A,TNFRSF10B,NRP2,FCSK,KSR1,BMP7,MYO3A,BMPR1B,NF2,CDK5R2,NPR1,NPR2,CAMK2B,NTRK2,ROR1,KSR2,BRSK2,NUP98,RIPK4,CBFA2T3,MAP3K6,NEURL1,CD40,DGKI,PRKN,CD81,MAP3K13,CDC25C,PAQR3,CDKN1C,CDK16,PDGFRB,ENPP1,CARD10,PFKFB1,PGAM2,CKM,SGMS1,PIK3C2B,PIK3C2G,CLK3,DSTYK,PIP4K2A…
GO: Molecular Function	GO:0016773	phosphotransferase activity, alcohol group as acceptor		9.685E-8	1.923E-4	9.617E-6	7.858E-5	198	1444	ACVR1,ACVRL1,ADCY9,MAP3K4,AXIN2,MAP3K5,ADORA1,ADORA2A,HEG1,AKT1,TRIB2,PIK3R3,DGKE,APP,ARAF,MADD,TNFSF11,MAPK15,RAP2C,TNK1,MYLK,TNFRSF11A,TNFRSF10B,NRP2,FCSK,KSR1,BMP7,MYO3A,BMPR1B,NF2,CDK5R2,NPR1,NPR2,CAMK2B,NTRK2,ROR1,KSR2,BRSK2,RIPK4,MAP3K6,NEURL1,CD40,DGKI,PRKN,CD81,MAP3K13,CDC25C,PAQR3,CDKN1C,CDK16,PDGFRB,ENPP1,CARD10,PFKFB1,PGAM2,PIK3C2B,PIK3C2G,CLK3,DSTYK,PIP4K2A,PLA2G1B,IQGAP3,CARD14,AKAP6…
GO: Molecular Function	GO:0004672	protein kinase activity		1.107E-7	2.198E-4	1.046E-5	8.551E-5	183	1315	ACVR1,ACVRL1,ADCY9,MAP3K4,AXIN2,MAP3K5,ADORA1,ADORA2A,HEG1,AKT1,TRIB2,DGKE,APP,ARAF,MADD,TNFSF11,MAPK15,RAP2C,TNK1,MYLK,TNFRSF11A,TNFRSF10B,NRP2,KSR1,BMP7,MYO3A,BMPR1B,NF2,CDK5R2,NPR1,NPR2,CAMK2B,NTRK2,ROR1,KSR2,BRSK2,RIPK4,MAP3K6,NEURL1,CD40,DGKI,CD81,MAP3K13,CDC25C,PAQR3,CDKN1C,CDK16,PDGFRB,ENPP1,CARD10,CLK3,DSTYK,PLA2G1B,IQGAP3,CARD14,AKAP6,HJV,MAGED1,EGLN1,NRG2,SOSTDC1,PPP2R5C,AATK,CSK,CSPG4,…
GO: Molecular Function	GO:0098918	structural constituent of synapse		1.782E-7	3.539E-4	1.591E-5	1.300E-4	14	30	ACTG1,GIT1,BSN,CAMK2B,INA,DLGAP1,DNM3,ERC2,CTBP2,MAGI2,DLG2,DLG3,SHANK2,SHANK3
GO: Molecular Function	GO:0000977	RNA polymerase II transcription regulatory region sequence-specific DNA binding		1.843E-7	3.659E-4	1.591E-5	1.300E-4	128	853	MEIS1,MEIS2,PARP1,AEBP1,MNT,EBF4,AIRE,MSX1,PHOX2A,ZBTB10,ZFHX3,MUC1,NPAS4,PRDM1,NEUROD2,NFATC2,NFE2L2,NFIB,NFIC,KLF9,NFIX,NFYA,NPAS2,ZBTB7C,NR4A2,RUNX2,OTX1,ZNF827,PBX1,PBX3,LRRFIP1,ZNF462,PITX3,ONECUT2,PRRX1,TBX4,TBX21,HINFP,FOXP4,FEV,GLIS1,CUX1,PROX1,ZNF646,ZNF536,ZFP42,SCRT1,PURA,ARNT2,DMRT1,NR2E3,FEZF2,GLIS3,EBF1,RFX4,GSC,KLF16,ELF4,ELF5,ELK1,LEF1,ERG,ESRRB,ESRRG,ETV4,ETV5,MECOM,ZFPM1,KCNIP3,…
GO: Molecular Function	GO:0005524	ATP binding		2.015E-7	4.002E-4	1.667E-5	1.362E-4	201	1485	ABCA2,ABCA4,ACACB,SMC1A,ACTA1,ACTG1,ACVR1,ACVRL1,ADCY9,MAP3K4,MAP3K5,AK4,AKT1,ABCD1,RAD54L,KIF6,TRIB2,FIGNL2,DGKE,ARAF,MAPK15,ASS1,ATP1A1,ATP1A3,AFG1L,TNK1,ABCC3,MYH3,MYH10,MYLK,MYH13,MYO1D,KIF1A,MYO1E,MYO10,FCSK,KSR1,MYO3A,BMPR1B,ACSF3,ATP8B3,NPR1,NPR2,NSF,CAMK2B,MYO1H,NTRK2,ROR1,KSR2,BRSK2,BTAF1,RIPK4,RUNX2,MAP3K6,TTLL8,DGKI,MAP3K13,CDK16,MAGI1,PDGFRB,ENPP1,PEX6,PFKFB1,CKM,CLCN6,PIK3C2B,PIK3C2G…
GO: Molecular Function	GO:0001228	DNA-binding transcription activator activity, RNA polymerase II-specific		2.223E-7	4.414E-4	1.719E-5	1.405E-4	82	483	MEIS1,MEIS2,PARP1,FOXO4,EBF4,AIRE,MSX1,PHOX2A,GRHL3,NPAS4,NEUROD2,NFATC2,NFE2L2,NFIB,NFIC,KLF9,NFIX,NFYA,NR4A2,RUNX2,OTX1,PBX1,PBX3,PITX3,ONECUT2,TBX4,TBX21,CREB5,FEV,GLIS1,ZEB2,ARNT2,DMRT1,NR2E3,FEZF2,GLIS3,EBF1,RFX4,ELF4,ELF5,ELK1,LEF1,ERG,STAG1,ESRRB,ESRRG,ETV4,ETV5,RXRB,ATF6,KLF13,GMEB1,STAG2,SOX10,SREBF1,STAT1,GLI2,TBXT,CREB3L3,TBX5,TCF4,TBX3,TCF3,TCF7L2,YY2,AKNA,TEAD1,TFDP1,TFE3,TOX2,HLF,AL…
GO: Molecular Function	GO:0000976	transcription regulatory region sequence-specific DNA binding		2.250E-7	4.469E-4	1.719E-5	1.405E-4	133	898	MEIS1,MEIS2,PARP1,AEBP1,MNT,EBF4,AIRE,MSX1,PHOX2A,ZBTB10,ZFHX3,MUC1,NPAS4,PRDM1,NEUROD2,NFATC2,NFE2,NFE2L2,NFIB,NFIC,KLF9,NFIX,NFYA,NPAS2,ZBTB7C,NR4A2,RUNX2,OTX1,ZNF827,PRKN,PBX1,PBX3,LRRFIP1,GTF3C5,ZNF462,PITX3,ONECUT2,PRRX1,TBX4,TBX21,HINFP,FOXP4,FEV,GLIS1,CUX1,PROX1,ZNF646,ZNF536,ZFP42,SCRT1,PURA,ARNT2,DMRT1,NR2E3,FEZF2,GLIS3,EBF1,RFX4,GSC,KLF16,ELF4,ELF5,ELK1,LEF1,ERG,ESRRB,ESRRG,ETV4,ETV5,ME…
GO: Molecular Function	GO:0001216	DNA-binding transcription activator activity		2.430E-7	4.826E-4	1.788E-5	1.461E-4	82	484	MEIS1,MEIS2,PARP1,FOXO4,EBF4,AIRE,MSX1,PHOX2A,GRHL3,NPAS4,NEUROD2,NFATC2,NFE2L2,NFIB,NFIC,KLF9,NFIX,NFYA,NR4A2,RUNX2,OTX1,PBX1,PBX3,PITX3,ONECUT2,TBX4,TBX21,CREB5,FEV,GLIS1,ZEB2,ARNT2,DMRT1,NR2E3,FEZF2,GLIS3,EBF1,RFX4,ELF4,ELF5,ELK1,LEF1,ERG,STAG1,ESRRB,ESRRG,ETV4,ETV5,RXRB,ATF6,KLF13,GMEB1,STAG2,SOX10,SREBF1,STAT1,GLI2,TBXT,CREB3L3,TBX5,TCF4,TBX3,TCF3,TCF7L2,YY2,AKNA,TEAD1,TFDP1,TFE3,TOX2,HLF,AL…
GO: Molecular Function	GO:0005516	calmodulin binding		3.128E-7	6.213E-4	2.219E-5	1.813E-4	45	213	MAP6,MBP,AEBP1,AKT1,REM1,MYH3,MYH10,MYLK,MYH13,MYO1D,MYO1E,MYO10,MYO3A,CACNA1A,CACNA1C,CACNA1S,CAMK2B,SYT7,PDE1C,PLCB3,FBXL2,IQGAP3,CNN3,EGLN1,MYH14,ESRRG,LRRK2,OBSCN,SCN5A,SLC8A2,SLC8A1,SLC8A3,CAMKK2,CDK5RAP2,MYO5C,STRN,UBR4,GRM4,TTN,KCNH1,KCNN1,KCNN3,KCNN4,KCNQ1,KCNQ3
GO: Molecular Function	GO:0032553	ribonucleotide binding		1.092E-6	2.169E-3	7.478E-5	6.110E-4	248	1947	ABCA2,ABCA4,ACACB,ACADM,SMC1A,ACTA1,ACTG1,ACVR1,ACVRL1,ADCY9,MAP3K4,MAP3K5,AK4,AKT1,ABCD1,RAD54L,KIF6,TRIB2,REM1,FIGNL2,DGKE,ARAF,ARL3,MAPK15,ASS1,ATP1A1,ATP1A3,RAP2C,AFG1L,TNK1,ABCC3,MYH3,MYH10,MYLK,MYH13,MYO1D,KIF1A,MYO1E,MYO10,FCSK,KSR1,MYO3A,BMPR1B,ACSF3,ATP8B3,NPR1,NPR2,NSF,CAMK2B,MYO1H,NTRK2,ROR1,KSR2,BRSK2,BTAF1,RIPK4,RUNX2,MAP3K6,TTLL8,DGKI,MAP3K13,CDK16,MAGI1,PDE1C,PDE2A,PDE4D,PDGFRB,ENP…
GO: Molecular Function	GO:0032555	purine ribonucleotide binding		1.153E-6	2.289E-3	7.631E-5	6.236E-4	246	1930	ABCA2,ABCA4,ACACB,ACADM,SMC1A,ACTA1,ACTG1,ACVR1,ACVRL1,ADCY9,MAP3K4,MAP3K5,AK4,AKT1,ABCD1,RAD54L,KIF6,TRIB2,REM1,FIGNL2,DGKE,ARAF,ARL3,MAPK15,ASS1,ATP1A1,ATP1A3,RAP2C,AFG1L,TNK1,ABCC3,MYH3,MYH10,MYLK,MYH13,MYO1D,KIF1A,MYO1E,MYO10,FCSK,KSR1,MYO3A,BMPR1B,ACSF3,ATP8B3,NPR1,NPR2,NSF,CAMK2B,MYO1H,NTRK2,ROR1,KSR2,BRSK2,BTAF1,RIPK4,RUNX2,MAP3K6,TTLL8,DGKI,MAP3K13,CDK16,MAGI1,PDE1C,PDE2A,PDE4D,PDGFRB,ENP…
GO: Molecular Function	GO:0003690	double-stranded DNA binding		1.356E-6	2.693E-3	8.688E-5	7.099E-4	147	1048	MEIS1,MEIS2,PARP1,AEBP1,MNT,EBF4,AIRE,MSX1,PHOX2A,ZBTB10,ZFHX3,MUC1,NPAS4,PRDM1,NEUROD2,NFATC2,NFE2,NFE2L2,NFIB,NFIC,KLF9,NFIX,NFYA,NPAS2,PCBP3,ZBTB7C,NR4A2,RUNX2,OTX1,ZNF827,PRKN,PBX1,PBX3,LRRFIP1,GTF3C5,ZNF462,PITX3,PMS1,ONECUT2,PRRX1,TBX4,TBX21,HINFP,FOXP4,FEV,GLIS1,CUX1,PROX1,ZNF646,ZNF536,ZFP42,SCRT1,PURA,ARNT2,DMRT1,RAD51B,NR2E3,FEZF2,RBMS1,GLIS3,EBF1,RFX4,GSC,KLF16,ELF4,ELF5,ELK1,LEF1,ERG,…
GO: Molecular Function	GO:0004674	protein serine/threonine kinase activity		1.590E-6	3.157E-3	9.866E-5	8.062E-4	131	913	ACVR1,ACVRL1,MAP3K4,MAP3K5,ADORA1,HEG1,AKT1,TRIB2,ARAF,MADD,TNFSF11,MAPK15,MYLK,TNFRSF11A,KSR1,BMP7,MYO3A,BMPR1B,CDK5R2,CAMK2B,KSR2,BRSK2,RIPK4,MAP3K6,CD40,CD81,MAP3K13,CDC25C,PAQR3,CDKN1C,CDK16,PDGFRB,CLK3,DSTYK,PLA2G1B,IQGAP3,AKAP6,HJV,MAGED1,EGLN1,SOSTDC1,AATK,CSK,CSPG4,PRKAB1,PRKAG1,PRKAR1A,PRKCB,PRKCE,PRKCH,MAPK4,RAPGEF2,MAP2K5,MAP2K6,PROX1,DAB2IP,MELK,ZEB2,PTPN1,RASIP1,NUAK1,NEK5,ULK4,DMPK,…
GO: Molecular Function	GO:1990837	sequence-specific double-stranded DNA binding		1.656E-6	3.288E-3	9.965E-5	8.143E-4	135	948	MEIS1,MEIS2,PARP1,AEBP1,MNT,EBF4,AIRE,MSX1,PHOX2A,ZBTB10,ZFHX3,MUC1,NPAS4,PRDM1,NEUROD2,NFATC2,NFE2,NFE2L2,NFIB,NFIC,KLF9,NFIX,NFYA,NPAS2,ZBTB7C,NR4A2,RUNX2,OTX1,ZNF827,PRKN,PBX1,PBX3,LRRFIP1,GTF3C5,ZNF462,PITX3,ONECUT2,PRRX1,TBX4,TBX21,HINFP,FOXP4,FEV,GLIS1,CUX1,PROX1,ZNF646,ZNF536,ZFP42,SCRT1,PURA,ARNT2,DMRT1,NR2E3,FEZF2,GLIS3,EBF1,RFX4,GSC,KLF16,ELF4,ELF5,ELK1,LEF1,ERG,ESRRB,ESRRG,ETV4,ETV5,ME…
GO: Molecular Function	GO:0017076	purine nucleotide binding		1.852E-6	3.678E-3	1.082E-4	8.840E-4	247	1951	ABCA2,ABCA4,ACACB,ACADM,SMC1A,ACTA1,ACTG1,ACVR1,ACVRL1,ADCY9,MAP3K4,MAP3K5,AK4,AKT1,ABCD1,RAD54L,KIF6,TRIB2,REM1,FIGNL2,DGKE,ARAF,ARL3,MAPK15,ASS1,ATP1A1,ATP1A3,RAP2C,AFG1L,TNK1,ABCC3,MYH3,MYH10,MYLK,MYH13,MYO1D,KIF1A,MYO1E,MYO10,FCSK,KSR1,MYO3A,BMPR1B,ACSF3,ATP8B3,NPR1,NPR2,NSF,CAMK2B,MYO1H,NTRK2,ROR1,KSR2,BRSK2,BTAF1,RIPK4,RUNX2,MAP3K6,TTLL8,DGKI,MAP3K13,CDK16,MAGI1,PDE1C,PDE2A,PDE4D,PDGFRB,ENP…
GO: Molecular Function	GO:0015085	calcium ion transmembrane transporter activity		1.927E-6	3.828E-3	1.094E-4	8.936E-4	47	241	SLC24A3,TPCN1,SLC24A4,REM1,ANK2,PHPT1,CACNA1I,CACNA1G,CACNA1A,CACNA1C,CACNA1D,CACNA1E,CACNA1S,CACNG1,CASQ1,PDE2A,PDE4D,CACNA2D2,AHNAK,PLCG1,PLCG2,MCOLN2,AKAP6,MCUB,CACNG3,TRPM3,RASA3,SLC8A2,SLC8A1,SLC8A3,THADA,CACNG5,FAM155B,JPH4,CRACR2A,GRIN2C,TRPC4,HPCA,FAM155A,HRH1,ITPR1,ITPR2,ITPR3,CHRNA10,TRPC7,JPH2,JPH3
GO: Molecular Function	GO:0044877	protein-containing complex binding		3.380E-6	6.714E-3	1.865E-4	1.524E-3	180	1357	MAP1B,SMC1A,ADAM11,ACVR1,ACVRL1,LRP1B,ADORA1,MTA3,AEBP1,SCAMP5,MMP14,SHROOM3,IRS4,GIT1,ANXA11,APBA1,GAS7,APP,SCARF1,MB21D2,PLPP3,SKAP1,NCOA1,LRRC15,MYH3,MYH10,MYL4,MYH13,MYO1D,MYO1E,MYO10,NAPA,MYO3A,NF2,SLC11A2,NRAP,NSF,NUMA1,CAPZB,CXCL16,CD9,PRKN,CD81,CD151,MAP3K13,DNAAF1,CDH13,CDKN1C,DLGAP1,ENPP1,PDZK1,PEX6,RCC1,OTOF,CLTA,PKP1,PLCG1,COL16A1,PON1,NCOR2,CSPG4,ERC2,CTBP2,CTNNA2,DAB2IP,HMGN5,MTSS1,…
GO: Molecular Function	GO:0030674	protein-macromolecule adaptor activity		4.137E-6	8.215E-3	2.220E-4	1.814E-3	45	233	VPS18,IRS4,ANK1,SH3RF1,ANK2,ANK3,ARHGAP4,SKAP1,NAPA,KSR1,KSR2,BLNK,CARD10,SUN2,GRAP2,TJP2,CDYL,AKAP6,COL8A2,COL11A1,ITSN2,CUX1,DAB2IP,MAGI2,EPS8,LRRK2,NUFIP1,BAIAP2,SHB,FRMD4A,RGS14,SHANK2,GAB1,MAPK8IP3,WWC1,SUN1,GRB7,GRB10,RAPGEF1,GRIP1,AKAP13,GRIP2,FLRT3,SHANK3,PELI2
GO: Molecular Function	GO:0005262	calcium channel activity		4.449E-6	8.835E-3	2.325E-4	1.900E-3	41	205	SLC24A3,TPCN1,SLC24A4,REM1,PHPT1,CACNA1I,CACNA1G,CACNA1A,CACNA1C,CACNA1D,CACNA1E,CACNA1S,CACNG1,CASQ1,PDE2A,PDE4D,CACNA2D2,AHNAK,PLCG1,PLCG2,MCOLN2,AKAP6,MCUB,CACNG3,TRPM3,RASA3,CACNG5,FAM155B,JPH4,CRACR2A,GRIN2C,TRPC4,HPCA,FAM155A,ITPR1,ITPR2,ITPR3,CHRNA10,TRPC7,JPH2,JPH3
GO: Molecular Function	GO:0035591	signaling adaptor activity		4.794E-6	9.521E-3	2.441E-4	1.995E-3	26	105	IRS4,SH3RF1,ARHGAP4,SKAP1,KSR1,KSR2,BLNK,CARD10,GRAP2,ITSN2,DAB2IP,MAGI2,EPS8,LRRK2,SHB,RGS14,SHANK2,GAB1,MAPK8IP3,GRB7,GRB10,RAPGEF1,GRIP1,AKAP13,GRIP2,SHANK3
GO: Molecular Function	GO:0004707	MAP kinase activity		6.065E-6	1.205E-2	3.011E-4	2.461E-3	64	380	MAP3K4,MAP3K5,ADORA1,TRIB2,ARAF,MADD,TNFSF11,MAPK15,TNFRSF11A,KSR1,BMP7,MAP3K6,CD40,CD81,MAP3K13,PAQR3,PDGFRB,PLA2G1B,IQGAP3,MAGED1,CSK,CSPG4,MAPK4,MAP2K5,MAP2K6,DAB2IP,ZEB2,PTPN1,DUSP7,DUSP8,DUSP9,RGS3,EPHA4,EPHB2,LRRK2,SPRED3,TAOK3,NOD1,FGF1,FGFR1,TAB1,SFRP1,RGS14,GAB1,SORL1,MAP3K20,PDCD4,MAPK8IP3,FGD4,SYK,RAPGEF1,GRM4,TIAM1,MAP4K1,AKAP13,TNXB,HRAS,HTR2A,WNT7B,IGF1R,INSR,KARS1,KIT,SPRY4
GO: Molecular Function	GO:0098879	structural constituent of postsynaptic specialization		6.881E-6	1.367E-2	3.333E-4	2.723E-3	7	10	GIT1,DLGAP1,MAGI2,DLG2,DLG3,SHANK2,SHANK3
GO: Molecular Function	GO:0008144	drug binding		7.688E-6	1.527E-2	3.635E-4	2.970E-3	225	1785	ABCA2,ABCA4,ACACB,SMC1A,MB,ACTA1,ACTG1,ACVR1,ACVRL1,ADCY9,MAP3K4,MAP3K5,AK4,AKT1,ABCD1,RAD54L,KIF6,TRIB2,FIGNL2,DGKE,ARAF,MAPK15,ASS1,ATP1A1,ATP1A3,AFG1L,TNK1,ABCC3,MYH3,MYH10,MYLK,MYH13,MYO1D,KIF1A,MYO1E,MYO10,FCSK,KSR1,MYO3A,BMPR1B,ACSF3,ATP8B3,NPR1,NPR2,NSF,CAMK2B,MYO1H,NTRK2,ROR1,KSR2,BRSK2,BTAF1,RIPK4,RUNX2,MAP3K6,TTLL8,DGKI,MAP3K13,CDK16,MAGI1,PDE2A,PDE4D,PDGFRB,ENPP1,PEX6,PFKFB1,CHRM3,CKM,…
GO: Molecular Function	GO:0035639	purine ribonucleoside triphosphate binding		7.905E-6	1.570E-2	3.651E-4	2.983E-3	231	1841	ABCA2,ABCA4,ACACB,SMC1A,ACTA1,ACTG1,ACVR1,ACVRL1,ADCY9,MAP3K4,MAP3K5,AK4,AKT1,ABCD1,RAD54L,KIF6,TRIB2,REM1,FIGNL2,DGKE,ARAF,ARL3,MAPK15,ASS1,ATP1A1,ATP1A3,RAP2C,AFG1L,TNK1,ABCC3,MYH3,MYH10,MYLK,MYH13,MYO1D,KIF1A,MYO1E,MYO10,FCSK,KSR1,MYO3A,BMPR1B,ACSF3,ATP8B3,NPR1,NPR2,NSF,CAMK2B,MYO1H,NTRK2,ROR1,KSR2,BRSK2,BTAF1,RIPK4,RUNX2,MAP3K6,TTLL8,DGKI,MAP3K13,CDK16,MAGI1,PDGFRB,ENPP1,PEX6,PFKFB1,CKM,CLCN6…
GO: Molecular Function	GO:0005088	Ras guanyl-nucleotide exchange factor activity		9.211E-6	1.829E-2	4.158E-4	3.397E-3	32	148	MCF2,PLEKHG1,ARHGEF37,MADD,DOCK11,DENND5B,RCC1,DENND6B,ARHGEF19,ITSN2,RAPGEF2,RAPGEF5,TIAM2,FARP2,FARP1,EPHA4,EPS8,OBSCN,ITSN1,DENND3,ARHGEF40,RAB3IP,ARHGEF16,DENND2B,FGD4,DENND5A,ARHGEF28,RAPGEF4,RAPGEF1,TIAM1,AKAP13,RGL3
GO: Molecular Function	GO:0005085	guanyl-nucleotide exchange factor activity		9.914E-6	1.969E-2	4.375E-4	3.575E-3	43	226	MCF2,PLEKHG1,ARHGEF37,MADD,DOCK11,HERC2,DENND5B,CYTH2,RCC1,DENND6B,ARHGEF19,ITSN2,RAPGEF2,RAPGEF5,ELMO1,TIAM2,FARP2,RALGDS,IQSEC3,RALGPS2,FARP1,EPHA4,EPS8,OBSCN,ITSN1,ARFGEF2,MON1A,DENND3,ARHGEF40,RAB3IP,IQSEC2,ARHGEF16,DENND2B,FGD4,DENND5A,ARHGEF28,RAPGEF4,RAPGEF1,TIAM1,AKAP13,HPS4,DOCK8,RGL3
GO: Molecular Function	GO:0030506	ankyrin binding		1.424E-5	2.828E-2	6.147E-4	5.023E-3	10	22	SPTBN4,ATP1A1,CACNA1D,CDH1,OBSCN,SCN5A,SLC8A1,SPTB,TTN,RHBG
GO: Molecular Function	GO:0000987	cis-regulatory region sequence-specific DNA binding		1.469E-5	2.917E-2	6.206E-4	5.071E-3	89	594	MEIS1,MEIS2,ZFHX3,MUC1,NPAS4,PRDM1,NEUROD2,NFATC2,NFE2,NFIB,NFIC,NFYA,NR4A2,RUNX2,OTX1,PBX1,LRRFIP1,PITX3,ONECUT2,PRRX1,HINFP,FOXP4,FEV,PROX1,ZNF536,ZFP42,ARNT2,DMRT1,NR2E3,FEZF2,GLIS3,EBF1,RFX4,GSC,KLF16,ELF4,ELK1,LEF1,ERG,ESRRB,ETV4,ZFPM1,KCNIP3,RXRB,ZBTB7A,SALL1,ATF6,KLF13,GMEB1,SMARCA4,FOXP1,SOX10,NKX6-2,SREBF1,STAT1,GLI2,KDM2B,TBXT,CREB3L3,TBX5,TCF4,TBX3,TCF3,CUX2,TCF7L2,TCF20,YY2,AKNA,TEAD1…
GO: Molecular Function	GO:0000978	RNA polymerase II cis-regulatory region sequence-specific DNA binding		1.750E-5	3.476E-2	7.241E-4	5.917E-3	87	580	MEIS1,MEIS2,ZFHX3,MUC1,NPAS4,PRDM1,NEUROD2,NFATC2,NFIB,NFIC,NFYA,NR4A2,RUNX2,OTX1,PBX1,LRRFIP1,PITX3,ONECUT2,PRRX1,HINFP,FOXP4,FEV,PROX1,ZNF536,ZFP42,ARNT2,NR2E3,FEZF2,GLIS3,EBF1,RFX4,GSC,KLF16,ELF4,ELK1,LEF1,ERG,ESRRB,ETV4,ZFPM1,KCNIP3,RXRB,ZBTB7A,SALL1,ATF6,KLF13,GMEB1,SMARCA4,FOXP1,SOX10,NKX6-2,SREBF1,STAT1,GLI2,KDM2B,TBXT,CREB3L3,TBX5,TCF4,TBX3,TCF3,CUX2,TCF7L2,TCF20,YY2,AKNA,TEAD1,PRDM5,NR2F…
GO: Molecular Function	GO:0043565	sequence-specific DNA binding		1.981E-5	3.934E-2	8.028E-4	6.560E-3	158	1199	MEIS1,MEIS2,PARP1,MTA3,AEBP1,FOXO4,MNT,EBF4,UNCX,AIRE,MSX1,PHOX2A,ZBTB10,ZFHX3,TNKS,GRHL3,MUC1,NPAS4,PRDM1,NEUROD2,NFATC2,NFE2,NFE2L2,NFIB,NFIC,KLF9,NFIX,NFYA,MYRF,NPAS2,ZBTB7C,NR4A2,RUNX2,OTX1,ZNF827,PRKN,PAX7,PBX1,PBX3,LRRFIP1,GTF3C5,ZNF462,PITX3,SPDEF,ONECUT2,PRRX1,TBX4,TBX21,POT1,IRX3,HINFP,NCOR2,FOXP4,FEV,TCF7L1,GLIS1,CUX1,PROX1,ZNF646,ZNF536,ZFP42,SCRT1,ZEB2,SOX7,PURA,ARNT2,DMRT1,DNMT1,NR2E…
GO: Molecular Function	GO:0016772	transferase activity, transferring phosphorus-containing groups		2.168E-5	4.306E-2	8.613E-4	7.038E-3	230	1859	ACVR1,ACVRL1,ADCY9,MAP3K4,AXIN2,MAP3K5,ADORA1,ADORA2A,HEG1,AK4,AKT1,TRIB2,PIK3R3,DGKE,APP,ARAF,MADD,TNFSF11,MAPK15,TNKS,RAP2C,TNK1,MYLK,TNFRSF11A,TNFRSF10B,NRP2,FCSK,KSR1,BMP7,MYO3A,BMPR1B,NF2,CDK5R2,NPR1,NPR2,CAMK2B,NTRK2,ROR1,KSR2,BRSK2,NUP98,RIPK4,CBFA2T3,MAP3K6,NEURL1,CD40,DGKI,PRKN,CD81,MAP3K13,CDC25C,PAQR3,CDKN1C,CDK16,PDGFRB,ENPP1,CARD10,PFKFB1,PGAM2,CKM,SGMS1,PIK3C2B,PIK3C2G,CLK3,DSTYK,PI…
GO: Molecular Function	GO:0019199	transmembrane receptor protein kinase activity		2.730E-5	5.422E-2	1.063E-3	8.687E-3	26	115	ACVR1,ACVRL1,ADORA1,APP,NRP2,BMPR1B,NTRK2,ROR1,NEURL1,PDGFRB,HJV,NRG2,SOSTDC1,PTK7,EPHA4,EPHA8,EPHB1,EPHB2,EPHB3,EPHB6,FGFR1,FGFR3,FGFR2,IGF1R,INSR,KIT
GO: Molecular Function	GO:0005244	voltage-gated ion channel activity		2.847E-5	5.653E-2	1.087E-3	8.884E-3	52	304	KCNH7,TPCN1,REM1,ANK3,APP,KCNK5,CACNA1I,CACNA1G,CACNA1A,CACNA1C,CACNA1D,CACNA1E,CACNA1S,CACNG1,CLIC6,CACNA2D2,CLCN2,CLCN6,AHNAK,AKAP6,PTAFR,DLG2,DLG3,EPHB2,KCNIP3,KCNIP1,CACNG3,KCNU1,SCN4A,SCN5A,SCN8A,RPH3A,NOX1,CACNG5,ABCC8,GRIN2C,PARK7,HPCA,KCNH6,PINK1,KCNA5,KCNA7,KCNB1,KCND3,KCNG1,KCNH1,KCNH2,KCNJ6,KCNMA1,KCNQ1,KCNAB1,KCNQ3
GO: Molecular Function	GO:0022832	voltage-gated channel activity		3.118E-5	6.192E-2	1.168E-3	9.546E-3	52	305	KCNH7,TPCN1,REM1,ANK3,APP,KCNK5,CACNA1I,CACNA1G,CACNA1A,CACNA1C,CACNA1D,CACNA1E,CACNA1S,CACNG1,CLIC6,CACNA2D2,CLCN2,CLCN6,AHNAK,AKAP6,PTAFR,DLG2,DLG3,EPHB2,KCNIP3,KCNIP1,CACNG3,KCNU1,SCN4A,SCN5A,SCN8A,RPH3A,NOX1,CACNG5,ABCC8,GRIN2C,PARK7,HPCA,KCNH6,PINK1,KCNA5,KCNA7,KCNB1,KCND3,KCNG1,KCNH1,KCNH2,KCNJ6,KCNMA1,KCNQ1,KCNAB1,KCNQ3
GO: Molecular Function	GO:0019904	protein domain specific binding		3.954E-5	7.852E-2	1.454E-3	1.188E-2	115	833	MAP3K5,FZD7,IRS4,APBA1,EPB41L5,CITED1,APP,MAPK15,SKAP1,ATP1A1,MYO1D,ADGRB1,NF2,SYNJ2,NFE2,NFE2L2,NPHS1,CACNA1C,CACNA1D,NSF,NUMA1,RUNX2,SHISA9,CD40,SNTG2,PRKN,CDC25C,CDH1,DLGAP2,DLGAP1,PDE2A,PDZK1,CARD10,DLGAP3,TJP2,CARD14,PRRX1,BCAR1,CHMP2B,RGS6,PRKAR1A,ERC2,PRKCE,RAPGEF2,PROX1,DAB2IP,DAB1,ELMO1,DLG2,DLG3,DNMT1,PDCD6IP,DTX1,EBF1,PLEKHA2,TNK2,LEF1,TCEAL9,EPHA4,ESRRG,EHD2,CACNG3,NOD1,DLC1,ATXN2,FMN…
GO: Molecular Function	GO:0098919	structural constituent of postsynaptic density		5.059E-5	1.005E-1	1.827E-3	1.493E-2	6	9	DLGAP1,MAGI2,DLG2,DLG3,SHANK2,SHANK3
GO: Molecular Function	GO:0015081	sodium ion transmembrane transporter activity		6.794E-5	1.349E-1	2.409E-3	1.969E-2	39	214	SLC24A3,TPCN1,SLC24A4,ANK3,SLC6A16,ATP1A1,ATP1A3,SLC4A4,SLC28A1,PRKCE,PCSK9,SGK2,SCN4A,SCN5A,SCN8A,FGF12,FGF13,SLC1A2,SLC1A3,SLC5A5,SLC6A1,SLC6A8,SLC6A9,SLC6A11,SLC8A2,SLC8A1,SLC8A3,CNKSR3,SLC9A9,SLC28A3,SLC9C1,GPLD1,GRIK3,GRIK4,TMPRSS3,UTRN,SLC6A17,SLC38A1,WNK2
GO: Molecular Function	GO:0051015	actin filament binding		7.544E-5	1.498E-1	2.629E-3	2.148E-2	39	215	SHROOM3,GAS7,MYH3,MYH10,MYL4,MYH13,MYO1D,MYO1E,MYO10,MYO3A,NRAP,CAPZB,CTNNA2,MTSS1,AIF1L,ARPC1B,LRPPRC,MYH14,CLMN,LIMA1,PPP1R9A,ABLIM3,ABLIM2,MYO16,SPTB,CLASP2,MYO5C,FGD4,SYNE2,SYNE1,TPM3,CORO1C,TTN,UTRN,EZR,CORO2A,ZNF185,WIPF2,ABLIM1
GO: Molecular Function	GO:0015077	monovalent inorganic cation transmembrane transporter activity		9.621E-5	1.911E-1	3.294E-3	2.692E-2	75	506	KCNH7,SLC24A3,TPCN1,SLC24A4,ANK2,ANK3,SLC6A16,KCNK5,ATP1A1,ATP1A3,SLC4A4,CACNA1D,SLC11A2,ATP6V0E1,SLC28A1,AKAP6,PRKCE,PCSK9,DPP6,SGK2,OTOP1,SLC45A2,KCNIP3,KCNIP1,KCNU1,SCN4A,SCN5A,SCN8A,FGF12,FGF13,TMEM175,SLC1A2,SLC1A3,SLC5A5,SLC6A1,SLC6A8,SLC6A9,SLC6A11,SLC8A2,SLC8A1,SLC8A3,CNKSR3,SLC9A9,OTOP2,SLC28A3,SLC12A8,SLC9C1,ABCC8,GPLD1,GRIK3,GRIK4,SLC2A10,KCNH6,TMPRSS3,UTRN,SLC2A9,SLC6A17,OTOP3,SLC38A1…
GO: Molecular Function	GO:0031267	small GTPase binding		1.054E-4	2.093E-1	3.548E-3	2.899E-2	71	474	MCF2,PLEKHG1,MICAL3,ARHGEF37,MOBP,GIT1,MADD,ARHGAP4,LSM2,DOCK11,WASF1,DENND5B,NSF,TBC1D25,ODF2,FMNL3,DGKI,EVI5L,RCC1,TBC1D22A,DENND6B,IQGAP3,ARHGEF19,ITSN2,PRKCH,RAPGEF2,USP6NL,RAB11FIP3,RAPGEF5,TIAM2,FARP2,RASIP1,RANBP9,FARP1,KCTD10,EPHA4,MTSS2,EPS8,LRRK2,TBC1D2,OBSCN,TBC1D16,ITSN1,RAB11FIP2,RAB11FIP1,RPH3A,DENND3,ARHGEF40,IPO9,NOX1,RAB3IP,EXOC2,SORL1,NUP50,PARD6G,ARHGEF16,DENND2B,PARD6B,FGD4,DE…
GO: Molecular Function	GO:0017016	Ras GTPase binding		1.175E-4	2.333E-1	3.815E-3	3.117E-2	69	459	MCF2,PLEKHG1,MICAL3,ARHGEF37,MOBP,MADD,ARHGAP4,LSM2,DOCK11,WASF1,DENND5B,NSF,TBC1D25,ODF2,FMNL3,DGKI,EVI5L,RCC1,TBC1D22A,DENND6B,IQGAP3,ARHGEF19,ITSN2,PRKCH,RAPGEF2,USP6NL,RAB11FIP3,RAPGEF5,TIAM2,FARP2,RASIP1,RANBP9,FARP1,KCTD10,EPHA4,MTSS2,EPS8,LRRK2,TBC1D2,OBSCN,TBC1D16,ITSN1,RAB11FIP2,RAB11FIP1,RPH3A,DENND3,ARHGEF40,IPO9,NOX1,RAB3IP,EXOC2,NUP50,PARD6G,ARHGEF16,DENND2B,PARD6B,FGD4,DENND5A,ARHGE…
GO: Molecular Function	GO:0051020	GTPase binding		1.187E-4	2.358E-1	3.815E-3	3.117E-2	83	577	MCF2,PLEKHG1,MICAL3,ARHGEF37,MOBP,GIT1,MADD,ARHGAP4,LSM2,DOCK11,HERC2,WASF1,DENND5B,NSF,TBC1D25,ODF2,FMNL3,DGKI,EVI5L,CYTH2,RCC1,TBC1D22A,CLTA,DENND6B,IQGAP3,ARHGEF19,ITSN2,PRKCH,RAPGEF2,USP6NL,RAB11FIP3,RAPGEF5,ELMO1,TIAM2,FARP2,RASIP1,RALGDS,IQSEC3,RALGPS2,RANBP9,FARP1,KCTD10,EPHA4,MTSS2,EPS8,LRRK2,TBC1D2,OBSCN,TBC1D16,ITSN1,PPP1R9A,RAB11FIP2,ARFGEF2,MON1A,RAB11FIP1,RPH3A,DENND3,ARHGEF40,IPO9,N…
GO: Molecular Function	GO:0030165	PDZ domain binding		1.191E-4	2.365E-1	3.815E-3	3.117E-2	25	118	FZD7,APBA1,ADGRB1,SYNJ2,CACNA1D,NSF,SHISA9,SNTG2,PRKN,PDZK1,DLGAP3,ERC2,RAPGEF2,DLG2,DLG3,PLEKHA2,CACNG3,BAIAP2,ARHGEF16,KIRREL3,TCF3,GRID2,GRIN2C,CIT,CADM1
GO: Molecular Function	GO:0003774	motor activity		1.362E-4	2.705E-1	4.294E-3	3.509E-2	29	147	KIF6,MYH3,MYH10,MYH13,MYO1D,KIF1A,MYO1E,MYO10,MYO3A,MYO1H,DCTN1,DNAH6,DNAH8,DNAH9,KIF26B,MYH14,DYNC1LI1,KIF21A,DNAI1,MYO16,KIF21B,KIF12,MYO5C,MTCL1,MYO18B,DNAI2,KIF5A,KIF5C,KIFC3
GO: Molecular Function	GO:0004713	protein tyrosine kinase activity		1.484E-4	2.948E-1	4.606E-3	3.764E-2	41	237	ADORA1,APP,RAP2C,TNK1,NRP2,NTRK2,ROR1,NEURL1,PDGFRB,CLK3,DSTYK,NRG2,AATK,CSK,MAP2K5,MAP2K6,MELK,PTK7,PTPN1,DLG3,TNK2,EPHA4,EPHA8,EPHB1,EPHB2,EPHB3,EPHB6,FGFR1,FGFR3,FGFR2,CAMKK2,FYN,SRMS,SYK,TCF3,SRCIN1,TTN,TXK,IGF1R,INSR,KIT
GO: Molecular Function	GO:0022843	voltage-gated cation channel activity		1.526E-4	3.030E-1	4.662E-3	3.809E-2	42	245	KCNH7,TPCN1,REM1,ANK3,APP,KCNK5,CACNA1I,CACNA1G,CACNA1A,CACNA1C,CACNA1D,CACNA1E,CACNA1S,CACNG1,CACNA2D2,AHNAK,AKAP6,DLG2,DLG3,EPHB2,CACNG3,KCNU1,RPH3A,CACNG5,ABCC8,GRIN2C,PARK7,HPCA,KCNH6,PINK1,KCNA5,KCNA7,KCNB1,KCND3,KCNG1,KCNH1,KCNH2,KCNJ6,KCNMA1,KCNQ1,KCNAB1,KCNQ3
GO: Molecular Function	GO:0030215	semaphorin receptor binding		1.595E-4	3.167E-1	4.798E-3	3.921E-2	9	23	SEMA6A,SEMA4G,SEMA5A,SEMA5B,SEMA6C,SEMA3F,SEMA4F,SEMA3C,SEMA3G
GO: Molecular Function	GO:0045499	chemorepellent activity		1.687E-4	3.349E-1	4.999E-3	4.085E-2	10	28	SEMA6A,SEMA4G,SEMA5A,SEMA5B,SEMA6C,SEMA3F,SEMA4F,SEMA3C,FLRT3,SEMA3G
GO: Molecular Function	GO:0005102	signaling receptor binding		1.715E-4	3.407E-1	5.010E-3	4.094E-2	219	1817	PIK3AP1,ADAM11,TENM2,FZD7,ADORA1,ADORA2A,PARP1,SEMA6A,MMP14,IRS4,APP,SEMA4G,MADD,TNFSF11,PLPP3,NCOA1,ATP1A3,MARCO,LRRC15,BBS1,BMP7,NF2,ZPR1,NOTCH4,NSF,NTRK2,NR4A2,SEMA5A,CXCL16,IGSF11,CLIC6,MAP7,OPRD1,OSM,CD9,SNTG2,PRKN,CD81,CD151,LGI1,PDE4D,CRLF1,PDGFRB,ENPP1,PDZK1,PENK,BLNK,TRIP4,NRXN3,NRXN2,SEMA5B,DDX54,PLA2G1B,JAKMIP1,PLCG1,CNTFR,HJV,NECAB2,COL16A1,DLL4,NRG2,SNED1,NCOR2,DNM3,PRKCB,PRKCE,CTBP2…
GO: Molecular Function	GO:1901681	sulfur compound binding		1.945E-4	3.863E-1	5.599E-3	4.575E-2	46	279	ACACB,ACADM,APP,ATP1A3,NRP2,BMP7,SEMA5A,ENPP1,RCC1,LIPG,COL11A1,COL13A1,ADAMTS3,PTGES,HACL1,PTPRS,IMPG2,CRISPLD2,HBEGF,LGR6,RPL22,LGR4,TMEM184A,FGF1,FGF12,FGFR1,FGFR2,SFRP1,SLIT1,SLIT3,SOD3,COL25A1,SMOC2,THBS2,HADHB,TNXB,HLCS,RTN4RL1,IGFALS,INSR,MCCC1,LXN,NAV2,LIPC,LRP1,LTBP2
GO: Molecular Function	GO:0008201	heparin binding		2.118E-4	4.206E-1	6.009E-3	4.910E-2	33	180	APP,NRP2,BMP7,LIPG,COL11A1,COL13A1,ADAMTS3,PTPRS,IMPG2,CRISPLD2,HBEGF,LGR6,RPL22,LGR4,TMEM184A,FGF1,FGF12,FGFR1,FGFR2,SFRP1,SLIT1,SLIT3,SOD3,COL25A1,SMOC2,THBS2,TNXB,RTN4RL1,IGFALS,LXN,NAV2,LIPC,LTBP2
GO: Molecular Function	GO:0060090	molecular adaptor activity		2.388E-4	4.743E-1	6.595E-3	5.389E-2	69	470	LRP1B,VPS18,IRS4,ANK1,SH3RF1,ANK2,ANK3,APP,SCARF1,ARHGAP4,SKAP1,MARCO,ADGRB1,NAPA,KSR1,KSR2,CXCL16,MAGI1,ENPP1,ENPP2,BLNK,CARD10,DLGAP3,SUN2,GRAP2,TJP2,CDYL,AKAP6,COL8A2,COL11A1,ITSN2,PDE4DIP,CUX1,DAB2IP,MAGI2,SSC5D,PCSK9,EPS8,LRRK2,NUFIP1,BAIAP2,STAB2,ITSN1,SHB,FRMD4A,RGS14,SHANK2,CORIN,MEGF10,GAB1,SORL1,DISC1,MAPK8IP3,WWC1,SUN1,GRB7,GRB10,RAPGEF1,GRIP1,AKAP13,GRIP2,TMPRSS3,FLRT3,CFI,SHANK3,SCAR…
GO: Molecular Function	GO:0034483	heparan sulfate sulfotransferase activity		2.391E-4	4.748E-1	6.595E-3	5.389E-2	7	15	HS6ST2,HS6ST3,HS6ST1,HS2ST1,HS3ST3B1,HS3ST3A1,NDST1
GO: Molecular Function	GO:0004714	transmembrane receptor protein tyrosine kinase activity		2.961E-4	5.881E-1	8.057E-3	6.583E-2	21	97	ADORA1,APP,NRP2,NTRK2,ROR1,NEURL1,PDGFRB,NRG2,PTK7,EPHA4,EPHA8,EPHB1,EPHB2,EPHB3,EPHB6,FGFR1,FGFR3,FGFR2,IGF1R,INSR,KIT
GO: Molecular Function	GO:0005509	calcium ion binding		3.141E-4	6.237E-1	8.429E-3	6.887E-2	99	734	MATN3,LRP1B,TENM2,HEG1,ANXA11,SLC25A12,MYL4,CRACR2B,VWA2,NOTCH2,NOTCH4,CACNA1E,CASQ1,SYT2,SYT7,REPS2,CDH1,PCDH9,CDH11,CDH13,ENPP1,ENPP2,OTOF,PLA2G1B,PRRG3,PLCB3,PLCG1,SLC25A23,SLC25A24,NECAB2,DLL4,PON1,DUOX2,SNED1,CELSR1,P4HTM,PLCH2,ITSN2,RAPGEF2,RAB11FIP3,PRRG1,DGKG,AIF1L,MELK,FAT4,DSG2,CRTAC1,MEGF6,MEGF8,RHOT1,KCNIP3,KCNIP1,SVEP1,EHD2,FBLN1,FBLN2,FBN2,CIB2,STAB2,ITSN1,CLSTN1,RPH3A,SLC8A1,SCUBE1…
GO: Molecular Function	GO:0004712	protein serine/threonine/tyrosine kinase activity		3.535E-4	7.020E-1	9.254E-3	7.562E-2	23	112	MAP3K4,MAP3K5,ADORA1,AKT1,ARAF,MAP3K6,MAP3K13,CLK3,DSTYK,MAP2K5,MAP2K6,DAB2IP,TNK2,EPHB2,RPS6KA1,RPS6KA2,LRRK2,TAOK3,TAB1,MAP3K20,RAPGEF1,MAP4K1,IGF1R
GO: Molecular Function	GO:0015079	potassium ion transmembrane transporter activity		3.541E-4	7.033E-1	9.254E-3	7.562E-2	39	231	KCNH7,SLC24A3,SLC24A4,ANK2,ANK3,KCNK5,ATP1A1,ATP1A3,CACNA1D,AKAP6,DPP6,SGK2,KCNIP3,KCNIP1,KCNU1,TMEM175,SLC9A9,SLC12A8,SLC9C1,ABCC8,GRIK3,GRIK4,KCNH6,KCNA5,KCNA7,KCNB1,KCND3,KCNG1,KCNH1,KCNH2,KCNJ6,KCNMA1,KCNN1,KCNN3,KCNN4,KCNQ1,KCNAB1,KCNQ3,WNK2
GO: Molecular Function	GO:0005089	Rho guanyl-nucleotide exchange factor activity		4.310E-4	8.559E-1	1.098E-2	8.973E-2	19	86	MCF2,PLEKHG1,ARHGEF37,DOCK11,ARHGEF19,ITSN2,TIAM2,FARP2,FARP1,EPHA4,EPS8,OBSCN,ITSN1,ARHGEF40,ARHGEF16,FGD4,ARHGEF28,TIAM1,AKAP13
GO: Molecular Function	GO:0048495	Roundabout binding		4.313E-4	8.565E-1	1.098E-2	8.973E-2	6	12	LGR6,LGR4,SLIT1,SLIT3,RTN4RL1,IGFALS
GO: Molecular Function	GO:0030169	low-density lipoprotein particle binding		5.801E-4	1.000E0	1.458E-2	1.192E-1	10	32	LRP1B,APP,SCARF1,CXCL16,CDH13,PCSK9,STAB2,SORL1,LIPC,LRP1
GO: Molecular Function	GO:0030551	cyclic nucleotide binding		6.468E-4	1.000E0	1.606E-2	1.312E-1	11	38	PDE1C,PDE2A,PDE4D,CNGA3,PRKAR1A,RAPGEF2,PDE11A,PDE10A,POPDC3,RAPGEF4,KCNH1
GO: Molecular Function	GO:0004970	ionotropic glutamate receptor activity		7.293E-4	1.000E0	1.740E-2	1.422E-1	17	76	APP,SHISA9,CNIH3,DLG2,DLG3,EPHB2,CACNG3,RPH3A,SHANK2,CACNG5,GRID2,GRIK3,GRIK4,GRIN2C,PARK7,SHANK3,PINK1
GO: Molecular Function	GO:0005078	MAP-kinase scaffold activity		7.349E-4	1.000E0	1.740E-2	1.422E-1	5	9	SH3RF1,KSR1,KSR2,MAPK8IP3,AKAP13
GO: Molecular Function	GO:0071936	coreceptor activity involved in Wnt signaling pathway		7.349E-4	1.000E0	1.740E-2	1.422E-1	5	9	ROR1,PTK7,GPC6,GPC4,LRP5
GO: Molecular Function	GO:0005283	amino acid:sodium symporter activity		7.359E-4	1.000E0	1.740E-2	1.422E-1	6	13	SLC1A2,SLC1A3,SLC6A1,SLC6A9,SLC6A11,SLC38A1
GO: Molecular Function	GO:0042578	phosphoric ester hydrolase activity		7.745E-4	1.000E0	1.802E-2	1.472E-1	93	700	ZFYVE1,ELFN2,PPM1H,CDC14A,PHPT1,PLPP3,PDE8B,ATP1A1,MYH3,MYO1D,SYNJ2,NTRK2,CTDSP1,HACD2,OPRD1,CDC25C,PDE1C,PDE2A,PDE4D,PDE6B,PDGFRB,ENPP1,ENPP2,PFKFB1,CHRM3,SSH1,PLCB3,PLCG1,CMKLR1,PLCG2,EGLN1,PON1,PPP2R2C,PPP2R5C,PLCH2,PHACTR3,PRKAR1A,CX3CR1,PHACTR2,PTAFR,ZEB2,MAGI2,PTPN1,PTPN14,NUAK1,PTPRM,PTPRN2,PTPRO,PTPRR,PTPRS,PTPRZ1,DLG2,DLG3,DMPK,PDE11A,DUSP7,DUSP8,DUSP9,FARP1,RCAN2,PPP1R27,EYA2,DLC1,FBP1,…
GO: Molecular Function	GO:0004705	JUN kinase activity		7.802E-4	1.000E0	1.802E-2	1.472E-1	22	111	MAP3K4,MAP3K5,TNFSF11,TNFRSF11A,MAP3K6,MAP3K13,DAB2IP,ZEB2,PTPN1,EPHA4,TAOK3,SFRP1,GAB1,MAP3K20,PDCD4,MAPK8IP3,FGD4,SYK,TIAM1,MAP4K1,TNXB,WNT7B
GO: Molecular Function	GO:0004879	nuclear receptor activity		8.258E-4	1.000E0	1.864E-2	1.523E-1	13	51	NR4A2,NR2E3,ESRRB,ESRRG,RXRB,NR5A1,SREBF1,NR2F1,NR2F2,THRA,PARK7,NR1H2,VDR
GO: Molecular Function	GO:0098531	ligand-activated transcription factor activity		8.258E-4	1.000E0	1.864E-2	1.523E-1	13	51	NR4A2,NR2E3,ESRRB,ESRRG,RXRB,NR5A1,SREBF1,NR2F1,NR2F2,THRA,PARK7,NR1H2,VDR
GO: Molecular Function	GO:0099094	ligand-gated cation channel activity		8.642E-4	1.000E0	1.928E-2	1.576E-1	34	202	KCNH7,TPCN1,APP,SHISA9,HTR3B,PDE4D,CNGA3,MCOLN2,AKAP6,CNIH3,DLG2,DLG3,EPHB2,CACNG3,RASA3,RPH3A,SHANK2,CACNG5,JPH4,GRIK3,GRIK4,GRIN2C,PARK7,KCNH6,SHANK3,PINK1,ITPR1,ITPR2,ITPR3,KCNH2,KCNJ6,CHRNA10,JPH2,JPH3
GO: Molecular Function	GO:0008066	glutamate receptor activity		8.847E-4	1.000E0	1.952E-2	1.595E-1	18	84	APP,SHISA9,CNIH3,DLG2,DLG3,EPHB2,CACNG3,RPH3A,SHANK2,CACNG5,GRID2,GRIK3,GRIK4,GRIN2C,GRM4,PARK7,SHANK3,PINK1
GO: Molecular Function	GO:0008013	beta-catenin binding		9.012E-4	1.000E0	1.967E-2	1.607E-1	19	91	AXIN2,FOXO4,DACT3,NF2,NR4A2,PRKN,CDH1,TCF7L1,LEF1,APC2,SALL1,MED12L,KANK1,AJAP1,TCF7L2,GRIP1,TRPC4,SMAD3,SMAD7
GO: Molecular Function	GO:0000146	microfilament motor activity		9.328E-4	1.000E0	2.014E-2	1.645E-1	8	23	MYH3,MYH10,MYH13,MYO1D,MYO1E,MYO10,MYO3A,MYH14
GO: Molecular Function	GO:0005267	potassium channel activity		9.712E-4	1.000E0	2.046E-2	1.672E-1	31	180	KCNH7,ANK2,ANK3,KCNK5,AKAP6,DPP6,SGK2,KCNIP3,KCNIP1,KCNU1,TMEM175,ABCC8,GRIK3,GRIK4,KCNH6,KCNA5,KCNA7,KCNB1,KCND3,KCNG1,KCNH1,KCNH2,KCNJ6,KCNMA1,KCNN1,KCNN3,KCNN4,KCNQ1,KCNAB1,KCNQ3,WNK2
GO: Molecular Function	GO:0004118	cGMP-stimulated cyclic-nucleotide phosphodiesterase activity		9.890E-4	1.000E0	2.046E-2	1.672E-1	3	3	PDE2A,PDE11A,PDE10A
GO: Molecular Function	GO:1905060	calcium:cation antiporter activity involved in regulation of postsynaptic cytosolic calcium ion concentration		9.890E-4	1.000E0	2.046E-2	1.672E-1	3	3	SLC8A2,SLC8A1,SLC8A3
GO: Molecular Function	GO:0017095	heparan sulfate 6-O-sulfotransferase activity		9.890E-4	1.000E0	2.046E-2	1.672E-1	3	3	HS6ST2,HS6ST3,HS6ST1
GO: Molecular Function	GO:0016595	glutamate binding		1.035E-3	1.000E0	2.120E-2	1.732E-1	19	92	APP,SHISA9,CNIH3,DLG2,DLG3,EPHB2,CACNG3,SLC1A3,RPH3A,SHANK2,CACNG5,GRID2,GRIK3,GRIK4,GRIN2C,GRM4,PARK7,SHANK3,PINK1
GO: Molecular Function	GO:1904929	coreceptor activity involved in Wnt signaling pathway, planar cell polarity pathway		1.084E-3	1.000E0	2.176E-2	1.778E-1	4	6	ROR1,PTK7,GPC6,GPC4
GO: Molecular Function	GO:0031802	type 5 metabotropic glutamate receptor binding		1.084E-3	1.000E0	2.176E-2	1.778E-1	4	6	ADORA2A,NECAB2,DNM3,FYN
GO: Molecular Function	GO:0015276	ligand-gated ion channel activity		1.145E-3	1.000E0	2.274E-2	1.858E-1	38	237	KCNH7,TPCN1,APP,SHISA9,HTR3B,PDE4D,CNGA3,MCOLN2,AKAP6,CNIH3,DLG2,DLG3,EPHB2,CACNG3,RASA3,RPH3A,SHANK2,CACNG5,GABRB1,GABRE,JPH4,GRID2,GRIK3,GRIK4,GRIN2C,PARK7,KCNH6,SHANK3,PINK1,ITPR1,ITPR2,ITPR3,KCNH2,KCNJ6,KCNMA1,CHRNA10,JPH2,JPH3
GO: Molecular Function	GO:0046332	SMAD binding		1.180E-3	1.000E0	2.321E-2	1.896E-1	18	86	ACVR1,ACVRL1,AXIN2,PARP1,CITED1,BMPR1B,LDLRAD4,ZEB2,MAGI2,PURA,ZBTB7A,ANKRD1,PRDM16,PMEPA1,HMGA2,SMAD3,SMAD6,SMAD7
GO: Molecular Function	GO:0005044	scavenger receptor activity		1.217E-3	1.000E0	2.370E-2	1.936E-1	13	53	SCARF1,MARCO,CXCL16,ENPP1,ENPP2,SSC5D,STAB2,CORIN,MEGF10,TMPRSS3,CFI,SCARA5,LRP1
GO: Molecular Function	GO:0005539	glycosaminoglycan binding		1.234E-3	1.000E0	2.380E-2	1.945E-1	39	246	APP,BGN,NRP2,BMP7,SEMA5A,LIPG,COL11A1,COL13A1,ADAMTS3,PTPRS,IMPG2,CRISPLD2,HBEGF,LGR6,RPL22,LGR4,NOD1,TMEM184A,FGF1,FGF12,FGFR1,FGFR2,SFRP1,STAB2,SLIT1,SLIT3,SOD3,COL25A1,SMOC2,SULF2,THBS2,TNXB,HK1,RTN4RL1,IGFALS,LXN,NAV2,LIPC,LTBP2
GO: Molecular Function	GO:0050839	cell adhesion molecule binding		1.258E-3	1.000E0	2.402E-2	1.963E-1	72	525	ADAM11,ACVR1,TENM2,MMP14,ANK3,MB21D2,PLPP3,NF2,CAPZB,CD9,CD81,CD151,CDH1,CDH11,CDH13,LRRFIP1,NRXN3,NRXN2,AHNAK,PKP1,TJP2,PLCB3,CNN3,COL16A1,CHMP2B,CTNNA2,DAB2IP,PSMB6,JAML,PTPN1,PTPRM,PTPRO,PTPRZ1,NECTIN2,DSG2,EEF1G,TBC1D2,OBSCN,FBLN1,FGF1,FGFR1,BAIAP2,LIMA1,CIB2,ADGRL1,TENM3,SND1,SEPTIN9,ARHGEF16,GFRA1,STAT1,SYK,ESM1,CDH22,PKP3,NISCH,IGSF21,TNR,TNXB,PARK7,TRPC4,HMGB1,CADM1,UTRN,EZR,NIBAN2,MICALL…
GO: Molecular Function	GO:0030552	cAMP binding		1.283E-3	1.000E0	2.426E-2	1.982E-1	8	24	PDE1C,PDE2A,PDE4D,PRKAR1A,RAPGEF2,PDE10A,POPDC3,RAPGEF4
GO: Molecular Function	GO:0022834	ligand-gated channel activity		1.448E-3	1.000E0	2.714E-2	2.217E-1	38	240	KCNH7,TPCN1,APP,SHISA9,HTR3B,PDE4D,CNGA3,MCOLN2,AKAP6,CNIH3,DLG2,DLG3,EPHB2,CACNG3,RASA3,RPH3A,SHANK2,CACNG5,GABRB1,GABRE,JPH4,GRID2,GRIK3,GRIK4,GRIN2C,PARK7,KCNH6,SHANK3,PINK1,ITPR1,ITPR2,ITPR3,KCNH2,KCNJ6,KCNMA1,CHRNA10,JPH2,JPH3
GO: Molecular Function	GO:0030020	extracellular matrix structural constituent conferring tensile strength		1.608E-3	1.000E0	2.985E-2	2.439E-1	11	42	COL6A6,COL4A1,COL8A1,COL8A2,COL9A1,COL9A3,COL11A1,COL13A1,COL15A1,COL16A1,COL25A1
GO: Molecular Function	GO:0071889	14-3-3 protein binding		1.941E-3	1.000E0	3.570E-2	2.917E-1	9	31	AKT1,KSR1,TBC1D22A,PRKCE,DAB2IP,HDAC7,SIK1,SRPK2,KCNH1
GO: Molecular Function	GO:0004708	MAP kinase kinase activity		2.043E-3	1.000E0	3.674E-2	3.002E-1	17	83	MAP3K4,MAP3K5,ADORA1,ARAF,MAP3K6,MAP3K13,MAP2K5,MAP2K6,DAB2IP,EPHB2,LRRK2,TAOK3,TAB1,MAP3K20,RAPGEF1,MAP4K1,IGF1R
GO: Molecular Function	GO:0001227	DNA-binding transcription repressor activity, RNA polymerase II-specific		2.053E-3	1.000E0	3.674E-2	3.002E-1	40	261	AEBP1,MNT,MSX1,ZFHX3,PRDM1,NFATC2,PCBP3,PRKN,LRRFIP1,SPDEF,PRRX1,TBX21,HINFP,FOXP4,GLIS1,PROX1,ZNF536,ZBTB20,SCRT1,ZEB2,PURA,FEZF2,GLIS3,GSC,KLF16,ZFPM1,KCNIP3,ZBTB7A,SALL1,NKX6-2,INSM2,TBX3,TCF3,CUX2,PRDM5,NR2F1,KLF8,MZF1,IGHMBP2,HMGA2
GO: Molecular Function	GO:0001217	DNA-binding transcription repressor activity		2.053E-3	1.000E0	3.674E-2	3.002E-1	40	261	AEBP1,MNT,MSX1,ZFHX3,PRDM1,NFATC2,PCBP3,PRKN,LRRFIP1,SPDEF,PRRX1,TBX21,HINFP,FOXP4,GLIS1,PROX1,ZNF536,ZBTB20,SCRT1,ZEB2,PURA,FEZF2,GLIS3,GSC,KLF16,ZFPM1,KCNIP3,ZBTB7A,SALL1,NKX6-2,INSM2,TBX3,TCF3,CUX2,PRDM5,NR2F1,KLF8,MZF1,IGHMBP2,HMGA2
GO: Molecular Function	GO:0016829	lyase activity		2.251E-3	1.000E0	3.991E-2	3.261E-1	77	581	ME2,ADCY9,ADORA1,ADORA2A,APP,PHPT1,MARCO,AUH,ADGRB1,ADGRB2,ADGRB3,ADGRD1,CA6,CACNA1C,CACNA1D,NPR1,NPR2,NUP98,HACD2,CBFA2T3,OPRD1,HACD1,PDE2A,PDE4D,GPR37L1,PFKFB1,PGAM2,CHRM3,CDYL,AKAP6,GABBR2,PRKAG1,HACL1,RAPGEF2,ZBTB20,NEIL1,TYW1,ENO2,ESRRB,LGR4,ZBTB7A,FBP1,PRKAG2,ADGRL1,SCLY,NDC1,NAXD,NUP50,FTCD,GHRH,APEX2,GNAI3,GNAL,GNAS,GNAT1,GNAZ,GNG7,ADGRL3,GOT1,GRIK3,GRM4,AKAP13,HADHB,HAL,HRH3,HK1,PARK7,HM…
GO: Molecular Function	GO:0005328	neurotransmitter:sodium symporter activity		2.290E-3	1.000E0	4.024E-2	3.288E-1	8	26	SLC6A16,SLC1A2,SLC1A3,SLC6A1,SLC6A8,SLC6A9,SLC6A11,SLC6A17
GO: Molecular Function	GO:0044325	ion channel binding		2.323E-3	1.000E0	4.037E-2	3.299E-1	25	143	ANK1,ANK2,ANK3,PHPT1,CACNA1C,USP10,PDE4D,PIRT,AKAP6,LRRK2,KCNIP3,KCNIP1,SCN5A,FGF12,FGF13,PPP1R9A,SLC8A1,FYN,ABCC8,KCNB1,KCND3,KCNH1,KCNQ1,KCNAB1,KCNQ3
GO: Molecular Function	GO:0098821	BMP receptor activity		2.338E-3	1.000E0	4.037E-2	3.299E-1	4	7	ACVR1,ACVRL1,HJV,SOSTDC1
GO: Molecular Function	GO:0030695	GTPase regulator activity		2.366E-3	1.000E0	4.046E-2	3.306E-1	46	313	RALGAPA1,SIPA1L2,ARHGAP21,GIT1,ARHGAP4,ADGRB3,ASAP2,TBC1D25,DGKI,EVI5L,ARHGAP22,TBC1D22A,ARHGEF19,RGS6,RAPGEF2,USP6NL,DAB2IP,ARHGAP24,GIT2,TIAM2,ARFGAP3,ARHGAP25,RALGDS,RGS3,TNK2,MTSS2,LRRK2,TBC1D2,TBC1D16,DLC1,AGAP1,AGAP3,RASA3,PRR5,ASAP3,SIPA1,RGS14,ARFGAP2,NUP50,ARHGAP15,RUNDC3A,SH3BP4,WNT11,RALGAPB,RALGAPA2,LLGL1
GO: Molecular Function	GO:0008017	microtubule binding		2.384E-3	1.000E0	4.046E-2	3.306E-1	43	288	MAP1B,MAP6,MTUS1,KIF6,ARL3,SKAP1,KIF1A,NUMA1,SUN2,JAKMIP1,CNN3,DNM3,TRAF3IP1,SPAG8,DCTN1,HAUS4,KIF26B,LRPPRC,APC2,LRRK2,FMN1,FGF13,KIF21A,CCDC187,RGS14,SIRT2,CDK5RAP2,KIF21B,KIF12,CLASP2,FTCD,MTCL1,MAPRE2,MTUS2,TIAM1,EZR,REEP1,MDM1,DPYSL5,KIF5A,KIF5C,KIFC3,MAP1LC3B
GO: Molecular Function	GO:0004112	cyclic-nucleotide phosphodiesterase activity		2.495E-3	1.000E0	4.199E-2	3.431E-1	10	38	PDE8B,PDE1C,PDE2A,PDE4D,PDE6B,EGLN1,PRKAR1A,PDE11A,PDE10A,GNAT1
GO: Molecular Function	GO:0005041	low-density lipoprotein particle receptor activity		2.579E-3	1.000E0	4.304E-2	3.517E-1	7	21	LRP1B,APP,CXCL16,PCSK9,STAB2,SORL1,LRP1
GO: Molecular Function	GO:0097110	scaffold protein binding		2.665E-3	1.000E0	4.378E-2	3.577E-1	15	71	CACNA1G,PDE4D,DLGAP3,SCN5A,BAIAP2,GRID2,CIT,PARK7,SHANK3,ITPR2,KARS1,KCNA5,KCNH2,KCNQ1,KIF5A
GO: Molecular Function	GO:0015271	outward rectifier potassium channel activity		2.667E-3	1.000E0	4.378E-2	3.577E-1	6	16	KCNU1,KCNA5,KCNB1,KCND3,KCNMA1,KCNQ1
GO: Biological Process	GO:0022008	neurogenesis		3.187E-37	3.046E-33	3.046E-33	2.967E-32	340	1867	MAP1B,MAP6,MCF2,GPRIN1,CSMD3,TENM2,DSCAML1,MEIS1,RNF157,FZD7,FZD9,ADORA2A,UNC5A,ARID1B,AKT1,SEMA6A,MMP14,SH3RF1,ANK3,UNCX,GIT1,ENC1,APBB2,GAS7,APOD,APP,CPNE5,SEMA4G,SCARF1,SPTBN4,S1PR5,ARHGAP4,PHOX2A,ARL3,PLPP3,NCOA1,ZFHX3,TMEM108,MDGA1,MYH10,NEXMIF,ADGRB1,ADGRB3,BBS1,NAPA,NRP2,PRDM1,BMP7,MYO3A,BMPR1B,NEUROD2,NF2,NFE2L2,NFIB,NFIX,ZPR1,WASF1,MYRF,SDK1,CDK5R2,CACNA1A,SLC11A2,CAMK2B,NTRK2,ROR1,BRSK2…
GO: Biological Process	GO:0048699	generation of neurons		6.308E-36	6.028E-32	3.014E-32	2.936E-31	322	1752	MAP1B,MAP6,MCF2,GPRIN1,CSMD3,TENM2,DSCAML1,MEIS1,RNF157,FZD7,FZD9,ADORA2A,UNC5A,ARID1B,AKT1,SEMA6A,SH3RF1,ANK3,UNCX,GIT1,ENC1,APBB2,GAS7,APOD,APP,CPNE5,SEMA4G,SCARF1,SPTBN4,S1PR5,ARHGAP4,PHOX2A,ARL3,NCOA1,ZFHX3,TMEM108,MDGA1,MYH10,NEXMIF,ADGRB1,ADGRB3,BBS1,NAPA,NRP2,PRDM1,BMP7,MYO3A,BMPR1B,NEUROD2,NF2,NFE2L2,NFIB,NFIX,ZPR1,WASF1,SDK1,CDK5R2,CACNA1A,SLC11A2,CAMK2B,NTRK2,BRSK2,CAPZB,NR4A2,SEMA5A,CT…
GO: Biological Process	GO:0030182	neuron differentiation		1.669E-32	1.595E-28	5.315E-29	5.178E-28	291	1579	MAP1B,MAP6,MCF2,GPRIN1,CSMD3,TENM2,DSCAML1,MEIS1,RNF157,FZD7,ADORA2A,UNC5A,ARID1B,AKT1,SEMA6A,ANK3,UNCX,GIT1,ENC1,APBB2,GAS7,APOD,APP,CPNE5,SEMA4G,SCARF1,SPTBN4,S1PR5,ARHGAP4,PHOX2A,ARL3,NCOA1,ZFHX3,TMEM108,MDGA1,MYH10,ADGRB1,ADGRB3,BBS1,NAPA,NRP2,PRDM1,BMP7,MYO3A,BMPR1B,NEUROD2,NFE2L2,NFIB,NFIX,ZPR1,WASF1,SDK1,CACNA1A,SLC11A2,CAMK2B,NTRK2,BRSK2,CAPZB,NR4A2,SEMA5A,CTDSP1,SYT2,RUNX2,OPCML,NEURL1,P…
GO: Biological Process	GO:0048666	neuron development		1.753E-26	1.675E-22	4.188E-23	4.080E-22	239	1298	MAP1B,MAP6,MCF2,GPRIN1,CSMD3,TENM2,DSCAML1,RNF157,ADORA2A,UNC5A,ARID1B,AKT1,SEMA6A,ANK3,GIT1,ENC1,APBB2,GAS7,APOD,APP,CPNE5,SEMA4G,SCARF1,SPTBN4,ARHGAP4,ARL3,TMEM108,MYH10,ADGRB1,ADGRB3,BBS1,NRP2,PRDM1,BMP7,MYO3A,BMPR1B,NEUROD2,NFE2L2,NFIB,ZPR1,WASF1,SDK1,CACNA1A,SLC11A2,CAMK2B,NTRK2,BRSK2,CAPZB,NR4A2,SEMA5A,SYT2,OPCML,NEURL1,PRKN,MAP3K13,PBX3,CDH1,PAQR3,CDH11,LGI1,CDKN1C,CDK16,PRTG,CYTH2,B4GALT5…
GO: Biological Process	GO:0007267	cell-cell signaling		1.700E-23	1.625E-19	3.250E-20	3.166E-19	305	1899	MAP1B,MBP,TENM2,AXIN2,FZD7,ADORA1,FZD9,ADORA2A,ARID1B,LRFN2,ATXN3,SORCS2,AKT1,TSHZ3,VPS18,ANK2,ANK3,GIT1,SLC25A5,PPFIA4,APBA1,PLEKHA4,APBA2,DGKE,CITED1,PPFIA3,APP,MADD,SPTBN4,TNFSF11,PHPT1,PLPP3,PDE8B,DACT3,TMEM108,TNKS,GRHL3,NPAS4,ADGRB1,NAPA,TNFRSF11A,NEUROD2,NFE2,CACNA1I,CACNA1G,BSN,CACNA1A,CACNA1C,CACNA1D,CACNA1E,LIMD1,CAMK2B,NTRK2,ROR1,BRSK2,NR4A2,SEMA5A,IGSF11,SYT2,SYT7,OPRD1,SHISA9,OSM,OXC…
GO: Biological Process	GO:0032989	cellular component morphogenesis		1.734E-22	1.657E-18	2.762E-19	2.691E-18	228	1297	MAP1B,MAP6,MATN3,ACTA1,ACTG1,MCF2,TENM2,DSCAML1,RNF157,FZD7,ADORA2A,UNC5A,HEG1,SEMA6A,SHROOM3,ANK2,ANK3,APBB2,EPB41L5,GAS7,APP,CPNE5,SEMA4G,SPTBN4,MSX1,ARHGAP4,C1GALT1C1,TMEM108,MYH3,MYH10,MYO10,ADGRB1,ADGRB3,BBS1,NRP2,BMP7,MYO3A,BMPR1B,NFIB,VWA2,WASF1,NOTCH4,CACNA1A,SLC11A2,NRAP,LIMD1,CAMK2B,NTRK2,BRSK2,CAPZB,NR4A2,CASQ1,SEMA5A,SYT2,MAP7,FMNL3,CD9,SH3D19,PRKN,MAP3K13,CDH1,CDH11,CDH13,LGI1,PRTG,P…
GO: Biological Process	GO:0031175	neuron projection development		2.240E-22	2.141E-18	3.058E-19	2.980E-18	209	1151	MAP1B,MAP6,MCF2,GPRIN1,CSMD3,TENM2,DSCAML1,RNF157,ADORA2A,UNC5A,ARID1B,AKT1,SEMA6A,ANK3,GIT1,ENC1,APBB2,GAS7,APOD,APP,CPNE5,SEMA4G,SCARF1,SPTBN4,ARHGAP4,TMEM108,MYH10,ADGRB1,ADGRB3,BBS1,NRP2,BMP7,MYO3A,BMPR1B,NFE2L2,NFIB,ZPR1,WASF1,SDK1,CACNA1A,SLC11A2,CAMK2B,NTRK2,BRSK2,CAPZB,NR4A2,SEMA5A,SYT2,NEURL1,PRKN,MAP3K13,CDH1,PAQR3,CDH11,LGI1,CDK16,PRTG,CYTH2,B4GALT5,NRXN3,SEMA5B,ATXN10,PLCG1,PLXNA1,CNT…
GO: Biological Process	GO:0120036	plasma membrane bounded cell projection organization		1.221E-21	1.167E-17	1.459E-18	1.421E-17	286	1790	MAP1B,MAP6,MCF2,GPRIN1,CSMD3,TENM2,DSCAML1,RNF157,ADORA2A,UNC5A,ARID1B,AKT1,SEMA6A,ABCD1,ANK3,GIT1,ENC1,APBB2,GAS7,APOD,APP,CPNE5,CDC14A,SEMA4G,MADD,SCARF1,SPTBN4,ARHGAP4,ARL3,MAPK15,TMEM108,ATP1A3,RAP2C,MYH10,MYLK,DOCK11,MYO10,ADGRB1,ADGRB3,BBS1,NRP2,BMP7,MYO3A,BMPR1B,NFE2L2,NFIB,ZPR1,WASF1,SDK1,UBXN10,CACNA1A,SLC11A2,CAMK2B,NTRK2,BRSK2,CAPZB,NR4A2,SEMA5A,SYT2,ODF2,TTLL8,NEURL1,PRKN,MAP3K13,DNAA…
GO: Biological Process	GO:0030030	cell projection organization		7.170E-21	6.852E-17	7.613E-18	7.417E-17	288	1828	MAP1B,MAP6,MCF2,GPRIN1,CSMD3,TENM2,DSCAML1,RNF157,ADORA2A,UNC5A,ARID1B,AKT1,SEMA6A,ABCD1,ANK3,GIT1,ENC1,APBB2,GAS7,APOD,APP,CPNE5,CDC14A,SEMA4G,MADD,SCARF1,SPTBN4,ARHGAP4,ARL3,MAPK15,TMEM108,ATP1A3,RAP2C,MYH10,MYLK,DOCK11,MYO10,ADGRB1,ADGRB3,BBS1,NRP2,BMP7,MYO3A,BMPR1B,NFE2L2,NFIB,ZPR1,WASF1,SDK1,UBXN10,CACNA1A,SLC11A2,CAMK2B,NTRK2,BRSK2,CAPZB,NR4A2,SEMA5A,SYT2,ODF2,TTLL8,NEURL1,PRKN,MAP3K13,DNAA…
GO: Biological Process	GO:0000902	cell morphogenesis		1.021E-20	9.754E-17	9.754E-18	9.503E-17	208	1179	MAP1B,MAP6,MATN3,MCF2,TENM2,DSCAML1,RNF157,FZD7,ADORA2A,UNC5A,HEG1,SEMA6A,SHROOM3,ANK3,APBB2,EPB41L5,GAS7,APP,CPNE5,SEMA4G,SPTBN4,MSX1,ARHGAP4,C1GALT1C1,TMEM108,MYH10,MYO10,ADGRB1,ADGRB3,BBS1,NRP2,BMP7,MYO3A,BMPR1B,NFIB,VWA2,WASF1,NOTCH4,CACNA1A,SLC11A2,LIMD1,CAMK2B,NTRK2,BRSK2,CAPZB,NR4A2,SEMA5A,SYT2,MAP7,FMNL3,SH3D19,PRKN,MAP3K13,CDH1,CDH11,CDH13,LGI1,PRTG,ENPP2,PARVB,B4GALT5,NRXN3,SSH1,SEMA5B,…
GO: Biological Process	GO:0120039	plasma membrane bounded cell projection morphogenesis		3.804E-20	3.635E-16	3.048E-17	2.969E-16	151	758	MAP1B,MAP6,MCF2,TENM2,DSCAML1,RNF157,ADORA2A,UNC5A,SEMA6A,ANK3,APBB2,GAS7,APP,CPNE5,SEMA4G,SPTBN4,ARHGAP4,TMEM108,MYH10,ADGRB1,ADGRB3,NRP2,BMP7,BMPR1B,NFIB,WASF1,CACNA1A,SLC11A2,CAMK2B,NTRK2,BRSK2,NR4A2,SEMA5A,SYT2,PRKN,MAP3K13,CDH11,LGI1,PRTG,ENPP2,B4GALT5,NRXN3,SEMA5B,PLCG1,PLXNA1,AATK,ITSN2,DNM3,AUTS2,CTNNA2,RAPGEF2,CUX1,DAB2IP,BOC,DAB1,ZEB2,PTPRM,PTPRO,PTPRS,PTPRZ1,FEZF2,RANBP9,EFNB2,MEGF8,FB…
GO: Biological Process	GO:0007417	central nervous system development		3.827E-20	3.657E-16	3.048E-17	2.969E-16	200	1129	MBP,DSCAML1,ADORA2A,PTCHD1,AK4,AKT1,ALDH3A2,UNCX,CITED1,APOD,APP,ARCN1,SPTBN4,MSX1,PHOX2A,PLPP3,NCOA1,ZFHX3,TMEM108,GRHL3,MDGA1,MYH10,MYO1D,KIF1A,BBS1,NAPA,NRP2,BMP7,NEUROD2,NF2,SYNJ2,NFIB,NFIX,ZPR1,CYP26C1,MYRF,CDK5R2,NPAS1,NPAS2,CACNA1A,NTRK2,ROR1,NR4A2,SEMA5A,OTX1,OXCT1,OXTR,INA,CD9,NEURL1,SNTG2,PRKN,PAX7,PBX3,CDH1,CDH11,ENPP2,GPR37L1,B4GALT5,SUN2,PITX3,JAKMIP1,CNTN1,COL4A1,DLL4,DPCD,DUOX2,ADG…
GO: Biological Process	GO:0051960	regulation of nervous system development		7.078E-20	6.764E-16	4.967E-17	4.839E-16	194	1088	MAP1B,MAP6,MCF2,CSMD3,MEIS1,RNF157,AKT1,SEMA6A,ENC1,APP,CPNE5,SEMA4G,SCARF1,S1PR5,ARHGAP4,SLC25A12,NCOA1,ZFHX3,GRHL3,MDGA1,NEXMIF,ADGRB1,ADGRB2,ADGRB3,BMP7,NEUROD2,NF2,NFE2L2,ZPR1,MYRF,SDK1,CACNA1A,CAMK2B,NTRK2,BRSK2,SEMA5A,CTDSP1,SYT2,OXTR,NEURL1,PRKN,MAP3K13,PBX1,MOSMO,CDH1,PAQR3,PRTG,ENPP2,CYTH2,GPR37L1,LRFN4,SEMA5B,PITX3,PLXNA1,CNTN1,PRRX1,DLL4,NRG2,IRX3,CELSR1,AATK,RGS6,CSPG4,ITSN2,DNM3,PRKC…
GO: Biological Process	GO:0048858	cell projection morphogenesis		7.277E-20	6.954E-16	4.967E-17	4.839E-16	151	763	MAP1B,MAP6,MCF2,TENM2,DSCAML1,RNF157,ADORA2A,UNC5A,SEMA6A,ANK3,APBB2,GAS7,APP,CPNE5,SEMA4G,SPTBN4,ARHGAP4,TMEM108,MYH10,ADGRB1,ADGRB3,NRP2,BMP7,BMPR1B,NFIB,WASF1,CACNA1A,SLC11A2,CAMK2B,NTRK2,BRSK2,NR4A2,SEMA5A,SYT2,PRKN,MAP3K13,CDH11,LGI1,PRTG,ENPP2,B4GALT5,NRXN3,SEMA5B,PLCG1,PLXNA1,AATK,ITSN2,DNM3,AUTS2,CTNNA2,RAPGEF2,CUX1,DAB2IP,BOC,DAB1,ZEB2,PTPRM,PTPRO,PTPRS,PTPRZ1,FEZF2,RANBP9,EFNB2,MEGF8,FB…
GO: Biological Process	GO:0048812	neuron projection morphogenesis		9.284E-20	8.871E-16	5.914E-17	5.762E-16	148	743	MAP1B,MAP6,MCF2,TENM2,DSCAML1,RNF157,ADORA2A,UNC5A,SEMA6A,ANK3,APBB2,GAS7,APP,CPNE5,SEMA4G,SPTBN4,ARHGAP4,TMEM108,MYH10,ADGRB1,ADGRB3,NRP2,BMP7,BMPR1B,NFIB,WASF1,CACNA1A,SLC11A2,CAMK2B,NTRK2,BRSK2,NR4A2,SEMA5A,SYT2,PRKN,MAP3K13,CDH11,LGI1,PRTG,B4GALT5,NRXN3,SEMA5B,PLCG1,PLXNA1,AATK,ITSN2,DNM3,AUTS2,CTNNA2,RAPGEF2,CUX1,DAB2IP,BOC,DAB1,ZEB2,PTPRM,PTPRO,PTPRS,PTPRZ1,FEZF2,RANBP9,EFNB2,MEGF8,FBXO31,F…
GO: Biological Process	GO:0032990	cell part morphogenesis		1.434E-19	1.371E-15	8.567E-17	8.347E-16	153	783	MAP1B,MAP6,MCF2,TENM2,DSCAML1,RNF157,ADORA2A,UNC5A,SEMA6A,ANK3,APBB2,GAS7,APP,CPNE5,SEMA4G,SPTBN4,ARHGAP4,TMEM108,MYH10,ADGRB1,ADGRB3,NRP2,BMP7,BMPR1B,NFIB,WASF1,CACNA1A,SLC11A2,CAMK2B,NTRK2,BRSK2,NR4A2,SEMA5A,SYT2,PRKN,MAP3K13,CDH11,LGI1,PRTG,ENPP2,B4GALT5,NRXN3,SEMA5B,PLCG1,PLXNA1,AATK,ITSN2,DNM3,AUTS2,CTNNA2,RAPGEF2,CUX1,DAB2IP,BOC,DAB1,ZEB2,PTPRM,PTPRO,PTPRS,PTPRZ1,NECTIN2,FEZF2,RANBP9,EFNB2,…
GO: Biological Process	GO:0099537	trans-synaptic signaling		2.605E-19	2.489E-15	1.464E-16	1.426E-15	168	900	MAP1B,MBP,TENM2,ADORA1,ADORA2A,ARID1B,LRFN2,ATXN3,SORCS2,AKT1,TSHZ3,VPS18,ANK3,GIT1,PPFIA4,APBA1,APBA2,DGKE,PPFIA3,APP,SPTBN4,TMEM108,NPAS4,ADGRB1,NAPA,NEUROD2,CACNA1I,CACNA1G,BSN,CACNA1A,CACNA1C,CACNA1D,CACNA1E,CAMK2B,NTRK2,IGSF11,SYT2,SYT7,OPRD1,SHISA9,OXTR,NEURL1,DGKI,PRKN,HTR3B,CDH1,CDH11,LGI1,DLGAP2,DLGAP1,CACNA2D2,PENK,CHRM3,NRXN3,SSH1,NRXN2,OTOF,PLCG1,SEPTIN5,EGLN1,GABBR2,CELSR1,PPT1,ERC2,…
GO: Biological Process	GO:0099536	synaptic signaling		4.834E-19	4.619E-15	2.566E-16	2.500E-15	169	913	MAP1B,MBP,TENM2,ADORA1,ADORA2A,ARID1B,LRFN2,ATXN3,SORCS2,AKT1,TSHZ3,VPS18,ANK3,GIT1,PPFIA4,APBA1,APBA2,DGKE,PPFIA3,APP,SPTBN4,TMEM108,NPAS4,ADGRB1,NAPA,NEUROD2,CACNA1I,CACNA1G,BSN,CACNA1A,CACNA1C,CACNA1D,CACNA1E,CAMK2B,NTRK2,IGSF11,SYT2,SYT7,OPRD1,SHISA9,OXTR,NEURL1,DGKI,PRKN,HTR3B,CDH1,CDH11,LGI1,DLGAP2,DLGAP1,CACNA2D2,PENK,CHRM3,NRXN3,SSH1,NRXN2,OTOF,PLCG1,SEPTIN5,EGLN1,GABBR2,CELSR1,PPT1,ERC2,…
GO: Biological Process	GO:0000904	cell morphogenesis involved in differentiation		9.086E-19	8.682E-15	4.570E-16	4.452E-15	163	873	MAP1B,MAP6,MATN3,MCF2,TENM2,DSCAML1,FZD7,UNC5A,HEG1,SEMA6A,ANK3,APBB2,EPB41L5,APP,SEMA4G,SPTBN4,ARHGAP4,C1GALT1C1,MYH10,ADGRB1,ADGRB3,BBS1,NRP2,BMP7,MYO3A,BMPR1B,NFIB,VWA2,NOTCH4,CACNA1A,SLC11A2,CAMK2B,NTRK2,BRSK2,NR4A2,SEMA5A,MAP3K13,CDH1,CDH11,LGI1,PRTG,ENPP2,PARVB,B4GALT5,NRXN3,SEMA5B,PLCG1,PLXNA1,BCAR1,AATK,DNM3,AUTS2,CTNNA2,RAPGEF2,CUX1,PROX1,BOC,DAB1,ZEB2,PTPRM,PTPRO,PTPRS,PTPRZ1,FEZF2,RANB…
GO: Biological Process	GO:0048667	cell morphogenesis involved in neuron differentiation		1.064E-18	1.017E-14	5.084E-16	4.953E-15	138	689	MAP1B,MAP6,MCF2,TENM2,DSCAML1,UNC5A,SEMA6A,ANK3,APBB2,APP,SEMA4G,SPTBN4,ARHGAP4,MYH10,ADGRB1,ADGRB3,BBS1,NRP2,BMP7,MYO3A,BMPR1B,NFIB,CACNA1A,SLC11A2,CAMK2B,NTRK2,BRSK2,NR4A2,SEMA5A,MAP3K13,CDH11,LGI1,PRTG,B4GALT5,NRXN3,SEMA5B,PLCG1,PLXNA1,AATK,DNM3,AUTS2,CTNNA2,RAPGEF2,CUX1,BOC,DAB1,ZEB2,PTPRM,PTPRO,PTPRS,PTPRZ1,FEZF2,RANBP9,GRK1,EFNB2,MEGF8,FBXO31,FARP1,LGR6,EPHA4,EPHA8,EPHB1,EPHB2,EPHB3,EPHB6,L…
GO: Biological Process	GO:0050808	synapse organization		2.574E-18	2.460E-14	1.171E-15	1.141E-14	110	498	ABHD17A,MAP1B,ACTG1,FZD9,LRFN2,ANK3,GIT1,APP,TMEM108,MDGA1,NPAS4,MYH10,ADGRB1,ADGRB2,ADGRB3,NRP2,NEUROD2,BSN,WASF1,SDK1,CACNA1A,CACNA1S,CAMK2B,C1QL3,NTRK2,OXTR,INA,NEURL1,CDH1,DLGAP1,CACNA2D2,ARHGAP22,DLGAP3,LRFN4,NRXN3,SSH1,NRXN2,COL4A1,EGLN1,NRG2,CHMP2B,DNM3,ERC2,CTBP2,CTNNA2,CX3CR1,DAB2IP,DCTN1,MAGI2,PTPRO,PTPRS,DLG2,DLG3,DMPK,IQSEC3,EFNB2,FARP1,EPHA4,EPHB1,EPHB2,EPHB3,LRRK2,ETV5,GPC4,FGFR2,BA…
GO: Biological Process	GO:0098916	anterograde trans-synaptic signaling		2.960E-18	2.829E-14	1.230E-15	1.198E-14	164	891	MAP1B,MBP,ADORA1,ADORA2A,ARID1B,LRFN2,ATXN3,SORCS2,AKT1,TSHZ3,VPS18,ANK3,GIT1,PPFIA4,APBA1,APBA2,DGKE,PPFIA3,APP,SPTBN4,TMEM108,NPAS4,ADGRB1,NAPA,NEUROD2,CACNA1I,CACNA1G,BSN,CACNA1A,CACNA1C,CACNA1D,CACNA1E,CAMK2B,NTRK2,IGSF11,SYT2,SYT7,OPRD1,SHISA9,OXTR,NEURL1,DGKI,PRKN,HTR3B,CDH1,CDH11,LGI1,DLGAP2,DLGAP1,CACNA2D2,PENK,CHRM3,NRXN3,SSH1,NRXN2,OTOF,PLCG1,SEPTIN5,EGLN1,GABBR2,CELSR1,PPT1,ERC2,PRKCB,…
GO: Biological Process	GO:0007268	chemical synaptic transmission		2.960E-18	2.829E-14	1.230E-15	1.198E-14	164	891	MAP1B,MBP,ADORA1,ADORA2A,ARID1B,LRFN2,ATXN3,SORCS2,AKT1,TSHZ3,VPS18,ANK3,GIT1,PPFIA4,APBA1,APBA2,DGKE,PPFIA3,APP,SPTBN4,TMEM108,NPAS4,ADGRB1,NAPA,NEUROD2,CACNA1I,CACNA1G,BSN,CACNA1A,CACNA1C,CACNA1D,CACNA1E,CAMK2B,NTRK2,IGSF11,SYT2,SYT7,OPRD1,SHISA9,OXTR,NEURL1,DGKI,PRKN,HTR3B,CDH1,CDH11,LGI1,DLGAP2,DLGAP1,CACNA2D2,PENK,CHRM3,NRXN3,SSH1,NRXN2,OTOF,PLCG1,SEPTIN5,EGLN1,GABBR2,CELSR1,PPT1,ERC2,PRKCB,…
GO: Biological Process	GO:0007409	axonogenesis		5.187E-18	4.957E-14	2.065E-15	2.012E-14	115	537	MAP1B,MAP6,MCF2,TENM2,DSCAML1,UNC5A,SEMA6A,ANK3,APBB2,APP,SEMA4G,SPTBN4,ARHGAP4,MYH10,ADGRB1,NRP2,BMP7,BMPR1B,NFIB,CACNA1A,NTRK2,BRSK2,NR4A2,SEMA5A,MAP3K13,CDH11,LGI1,PRTG,B4GALT5,NRXN3,SEMA5B,PLCG1,PLXNA1,AATK,AUTS2,CTNNA2,BOC,DAB1,ZEB2,PTPRM,PTPRO,PTPRS,PTPRZ1,FEZF2,RANBP9,EFNB2,MEGF8,LGR6,EPHA4,EPHA8,EPHB1,EPHB2,EPHB3,EPHB6,CDKL3,ETV4,LGR4,EXT1,FGF8,FGF13,FGFR3,FGFR2,BAIAP2,SEMA6C,SEMA3F,SEMA4…
GO: Biological Process	GO:0061564	axon development		2.813E-17	2.688E-13	1.075E-14	1.048E-13	120	584	MAP1B,MAP6,MCF2,TENM2,DSCAML1,UNC5A,SEMA6A,ANK3,APBB2,APOD,APP,SEMA4G,SCARF1,SPTBN4,ARHGAP4,MYH10,ADGRB1,NRP2,BMP7,BMPR1B,NFIB,ZPR1,CACNA1A,NTRK2,BRSK2,NR4A2,SEMA5A,MAP3K13,CDH11,LGI1,PRTG,B4GALT5,NRXN3,SEMA5B,PLCG1,PLXNA1,AATK,AUTS2,CTNNA2,BOC,DAB1,ZEB2,PTPRM,PTPRO,PTPRS,PTPRZ1,FEZF2,RANBP9,CRTAC1,EFNB2,MEGF8,LGR6,EPHA4,EPHA8,EPHB1,EPHB2,EPHB3,EPHB6,CDKL3,ETV4,LGR4,EXT1,FGF8,FGF13,FGFR3,FGFR2,BA…
GO: Biological Process	GO:0007420	brain development		3.808E-17	3.639E-13	1.400E-14	1.364E-13	153	830	MBP,DSCAML1,PTCHD1,AK4,UNCX,CITED1,APOD,APP,ARCN1,MSX1,PHOX2A,NCOA1,ZFHX3,TMEM108,MDGA1,MYH10,MYO1D,KIF1A,BBS1,NAPA,NRP2,BMP7,NEUROD2,NF2,SYNJ2,NFIB,NFIX,CDK5R2,CACNA1A,NTRK2,NR4A2,SEMA5A,OTX1,OXCT1,OXTR,INA,CD9,NEURL1,CDH1,GPR37L1,SUN2,PITX3,JAKMIP1,CNTN1,COL4A1,DPCD,DUOX2,NCOR2,AATK,PPT1,CSK,CHD5,CTNNA2,RAPGEF2,CX3CR1,PROX1,DAB2IP,SNPH,IFT172,DAB1,ZEB2,PTPRS,ARNT2,ULK4,FAT4,FEZF2,SAMD4B,CRTAC1,…
GO: Biological Process	GO:0060322	head development		4.442E-17	4.244E-13	1.572E-14	1.532E-13	160	885	MBP,DSCAML1,PTCHD1,AK4,MMP14,UNCX,CITED1,APOD,APP,ARCN1,MSX1,PHOX2A,NCOA1,ZFHX3,TMEM108,MDGA1,MYH3,MYH10,MYO1D,KIF1A,BBS1,NAPA,NRP2,BMP7,NEUROD2,NF2,SYNJ2,NFIB,NFIX,CDK5R2,CACNA1A,NTRK2,NR4A2,SEMA5A,OTX1,OXCT1,OXTR,INA,CD9,NEURL1,CDH1,GPR37L1,SUN2,PITX3,JAKMIP1,CNTN1,COL4A1,DPCD,DUOX2,NCOR2,AATK,PPT1,CSK,CHD5,CTNNA2,RAPGEF2,CX3CR1,PROX1,DAB2IP,SNPH,IFT172,DAB1,ZEB2,PTPRS,ARNT2,ULK4,CRISPLD2,FAT4,…
GO: Biological Process	GO:0050767	regulation of neurogenesis		2.546E-16	2.433E-12	8.690E-14	8.466E-13	169	972	MAP1B,MAP6,MCF2,CSMD3,MEIS1,RNF157,AKT1,SEMA6A,ENC1,APP,CPNE5,SEMA4G,SCARF1,S1PR5,ARHGAP4,NCOA1,ZFHX3,NEXMIF,ADGRB3,BMP7,NEUROD2,NF2,NFE2L2,SDK1,CACNA1A,CAMK2B,NTRK2,BRSK2,SEMA5A,CTDSP1,SYT2,NEURL1,PRKN,MAP3K13,PBX1,MOSMO,CDH1,PAQR3,PRTG,ENPP2,CYTH2,GPR37L1,SEMA5B,PITX3,PLXNA1,CNTN1,PRRX1,DLL4,IRX3,AATK,RGS6,CSPG4,ITSN2,DNM3,PRKCH,KDM4A,CTNNA2,RAPGEF2,CUX1,CX3CR1,PROX1,DAB2IP,ZNF536,KLK6,SCRT1,DA…
GO: Biological Process	GO:0097485	neuron projection guidance		2.808E-16	2.683E-12	9.253E-14	9.015E-13	77	308	TENM2,DSCAML1,UNC5A,SEMA6A,ANK3,APBB2,APP,SEMA4G,SPTBN4,MYH10,NRP2,BMP7,BMPR1B,NFIB,SEMA5A,LGI1,PRTG,NRXN3,SEMA5B,PLCG1,PLXNA1,BOC,DAB1,PTPRM,PTPRO,FEZF2,RANBP9,EFNB2,MEGF8,LGR6,EPHA4,EPHA8,EPHB1,EPHB2,EPHB3,EPHB6,ETV4,LGR4,EXT1,FGF8,SEMA6C,SEMA3F,SEMA4F,SEMA3C,DPYSL4,CYFIP2,SLIT1,SLIT3,FOXP1,FYN,GAB1,UNC5B,SPTB,NFASC,GDNF,GFRA1,MAPK8IP3,GLI2,GRB7,GRB10,RNF165,TNR,FLRT3,EZR,WNT3,WNT7B,RTN4RL1,NIB…
GO: Biological Process	GO:0007411	axon guidance		7.833E-16	7.485E-12	2.495E-13	2.431E-12	76	307	TENM2,DSCAML1,UNC5A,SEMA6A,ANK3,APBB2,APP,SEMA4G,SPTBN4,MYH10,NRP2,BMP7,BMPR1B,NFIB,SEMA5A,LGI1,PRTG,NRXN3,SEMA5B,PLCG1,PLXNA1,BOC,DAB1,PTPRM,PTPRO,FEZF2,RANBP9,EFNB2,MEGF8,LGR6,EPHA4,EPHA8,EPHB1,EPHB2,EPHB3,EPHB6,ETV4,LGR4,EXT1,FGF8,SEMA6C,SEMA3F,SEMA4F,SEMA3C,CYFIP2,SLIT1,SLIT3,FOXP1,FYN,GAB1,UNC5B,SPTB,NFASC,GDNF,GFRA1,MAPK8IP3,GLI2,GRB7,GRB10,RNF165,TNR,FLRT3,EZR,WNT3,WNT7B,RTN4RL1,NIBAN2,SHA…
GO: Biological Process	GO:0060284	regulation of cell development		1.248E-15	1.193E-11	3.847E-13	3.748E-12	187	1133	MAP1B,MAP6,MCF2,CSMD3,MEIS1,RNF157,AXIN2,AKT1,SEMA6A,PI16,ENC1,APP,CPNE5,SEMA4G,SCARF1,S1PR5,ARHGAP4,TNFSF11,NCOA1,ZFHX3,NEXMIF,ADGRB3,BMP7,NEUROD2,NF2,NFE2L2,SDK1,NOTCH2,CACNA1A,NPR2,CAMK2B,NTRK2,BRSK2,SEMA5A,CTDSP1,SYT2,NEURL1,PRKN,MAP3K13,PBX1,MOSMO,CDH1,PAQR3,PRTG,ENPP2,CYTH2,GPR37L1,SEMA5B,PITX3,TJP2,PLXNA1,CNTN1,AKAP6,PRRX1,DLL4,IRX3,BCAR1,ADGRA2,AATK,RGS6,CSPG4,ITSN2,DNM3,PRKCH,KDM4A,CTNNA…
GO: Biological Process	GO:0009887	animal organ morphogenesis		1.434E-15	1.371E-11	4.283E-13	4.173E-12	200	1241	MATN3,ACTA1,ACVR1,ACVRL1,DSCAML1,MEIS1,AXIN2,FZD7,HEG1,SLC24A4,SEMA6A,MMP14,TSHZ3,UNCX,PLEKHA4,CITED1,MSX1,TNFSF11,GRHL3,MYLK,BBS1,NRP2,PRDM1,BMP7,MYO3A,BMPR1B,NF2,NFIB,NFIC,VWA2,SDK1,NOTCH2,NTRK2,ROR1,TSPEAR,RUNX2,OTX1,PAX7,PBX1,DNAAF1,CDH1,HACD1,PDGFRB,CHAD,PITX3,CNGA3,PLXNA1,ONECUT2,COL8A1,COL8A2,ARHGEF19,COL9A1,PRRX1,COL11A1,TBX4,COL13A1,MAGED1,SLC39A3,DLL4,EGLN1,SOSTDC1,DUOX2,CHST11,IRX3,NCO…
GO: Biological Process	GO:0045664	regulation of neuron differentiation		2.942E-14	2.812E-10	8.521E-12	8.301E-11	140	792	MAP1B,MAP6,MCF2,CSMD3,MEIS1,RNF157,AKT1,SEMA6A,ENC1,APP,CPNE5,SEMA4G,SCARF1,S1PR5,ARHGAP4,NCOA1,ZFHX3,ADGRB3,BMP7,NEUROD2,NFE2L2,SDK1,CACNA1A,CAMK2B,NTRK2,BRSK2,SEMA5A,CTDSP1,SYT2,NEURL1,PRKN,MAP3K13,PBX1,MOSMO,PAQR3,CYTH2,GPR37L1,SEMA5B,PLXNA1,CNTN1,PRRX1,IRX3,AATK,RGS6,CSPG4,ITSN2,DNM3,KDM4A,CTNNA2,RAPGEF2,CUX1,PROX1,DAB2IP,ZNF536,KLK6,DAB1,ZEB2,CASZ1,PTK7,MAGI2,PTPRO,PTPRS,PTPRZ1,DIO3,ULK4,FEZ…
GO: Biological Process	GO:0009790	embryo development		6.519E-14	6.229E-10	1.832E-11	1.785E-10	197	1263	MBP,ACVR1,ACVRL1,ADA,LRP1B,DSCAML1,ADCY9,AXIN2,FZD7,HEG1,AKT1,MMP14,MMP15,TSHZ3,SHROOM3,APBA1,APBA2,EPB41L5,CITED1,MSX1,PLPP3,NCOA1,GRHL3,MYH3,MYH10,MYO1E,NRP2,PRDM1,BMP7,MYO3A,NF2,NFE2,NFE2L2,ZPR1,NMT1,NOTCH2,CACNA1C,RUNX2,OTX1,PAX7,PBX1,DNAAF1,CDH1,CDKN1C,PDGFRB,PDZK1,B4GALT5,KPNA7,HS6ST1,PLCG1,COL8A1,PRRX1,COL11A1,TBX4,SLC39A3,ADAMTS3,DLL4,EGLN1,CHST11,IRX3,GTF2IRD1,HINFP,NCOR2,FOXP4,CELSR1,SH…
GO: Biological Process	GO:0035295	tube development		1.778E-13	1.699E-9	4.854E-11	4.729E-10	197	1276	MCAM,ACVR1,ACVRL1,ADA,MEIS1,HEG1,AKT1,FOXO4,SEMA6A,MMP14,TSHZ3,SHROOM3,PIK3R3,EPB41L5,CITED1,APOD,ASS1,GRHL3,MYLK,MYO1E,ADGRB1,ADGRB2,ADGRB3,NRP2,PRDM1,BMP7,NFE2L2,NFIB,NOTCH2,NOTCH4,NPR1,NTRK2,NUMA1,SEMA5A,FMNL3,OXTR,CD40,PAX7,PBX1,DNAAF1,CDH1,CDH13,CRLF1,PDGFRB,ENPP2,CARD10,ARHGAP22,NRXN3,HS6ST1,SPDEF,PLCG1,COL4A1,COL8A1,COL8A2,PRRX1,TBX4,COL15A1,MAGED1,ADAMTS2,DLL4,PODXL,EGLN1,SOSTDC1,IRX3,ADG…
GO: Biological Process	GO:0030900	forebrain development		2.884E-13	2.756E-9	7.656E-11	7.459E-10	91	445	PTCHD1,UNCX,APP,MSX1,NCOA1,TMEM108,MDGA1,MYH10,MYO1D,KIF1A,BBS1,NRP2,NF2,NFIB,CDK5R2,NTRK2,NR4A2,SEMA5A,OTX1,OXTR,CDH1,SUN2,JAKMIP1,DPCD,DUOX2,NCOR2,CHD5,RAPGEF2,CX3CR1,PROX1,DAB2IP,DAB1,ZEB2,PTPRS,ULK4,FAT4,FEZF2,CRTAC1,RFX4,GSC,LEF1,EPHB2,EPHB3,LRRK2,MECOM,EXT1,FABP7,DLC1,SALL1,SCN5A,FGF8,FGF13,FGFR1,FGFR3,FGFR2,ATG7,SLC1A2,SLC8A1,SLC8A3,SLIT1,SLIT3,SMARCA4,DMRTA2,FYN,SOX3,DISC1,MAPK8IP3,GHRH,K…
GO: Biological Process	GO:0050803	regulation of synapse structure or activity		3.298E-13	3.152E-9	8.518E-11	8.298E-10	67	282	ABHD17A,FZD9,LRFN2,APP,MDGA1,MYH10,ADGRB1,ADGRB2,ADGRB3,NRP2,NEUROD2,CAMK2B,C1QL3,NTRK2,OXTR,NEURL1,ARHGAP22,LRFN4,SSH1,EGLN1,NRG2,CHMP2B,PPT1,DNM3,CTNNA2,DAB2IP,DCTN1,MAGI2,PTPRO,PTPRS,DMPK,FARP1,EPHA4,EPHB1,EPHB2,EPHB3,LRRK2,ETV5,GPC4,BAIAP2,SEMA3F,ITSN1,PPP1R9A,ADGRL1,CLSTN1,SHANK2,SLIT1,FYN,SPARC,DISC1,CLSTN2,SLITRK2,VSTM5,ADGRL3,CUX2,RAPGEF4,GRID2,SRCIN1,THBS2,TIAM1,GRIP2,FLRT3,SHANK3,TANC1,…
GO: Biological Process	GO:0050807	regulation of synapse organization		4.678E-13	4.470E-9	1.176E-10	1.146E-9	65	271	ABHD17A,FZD9,LRFN2,APP,MDGA1,MYH10,ADGRB1,ADGRB2,ADGRB3,NRP2,NEUROD2,CAMK2B,C1QL3,NTRK2,OXTR,NEURL1,ARHGAP22,LRFN4,SSH1,EGLN1,NRG2,CHMP2B,DNM3,CTNNA2,DAB2IP,DCTN1,MAGI2,PTPRO,PTPRS,DMPK,FARP1,EPHA4,EPHB1,EPHB2,EPHB3,LRRK2,ETV5,GPC4,BAIAP2,SEMA3F,ITSN1,PPP1R9A,ADGRL1,CLSTN1,SHANK2,SLIT1,FYN,SPARC,DISC1,CLSTN2,SLITRK2,VSTM5,ADGRL3,CUX2,RAPGEF4,GRID2,SRCIN1,THBS2,TIAM1,GRIP2,FLRT3,SHANK3,TANC1,IL1RA…
GO: Biological Process	GO:0050804	modulation of chemical synaptic transmission		6.803E-13	6.501E-9	1.667E-10	1.624E-9	103	539	MAP1B,ADORA1,ADORA2A,LRFN2,SORCS2,TSHZ3,VPS18,GIT1,APBA1,APBA2,DGKE,PPFIA3,APP,TMEM108,NPAS4,ADGRB1,NAPA,NEUROD2,CACNA1A,CACNA1D,CAMK2B,NTRK2,IGSF11,SYT2,SYT7,SHISA9,OXTR,NEURL1,DGKI,PRKN,CDH1,CDH11,LGI1,DLGAP2,CACNA2D2,NRXN3,SSH1,PLCG1,SEPTIN5,EGLN1,CELSR1,PRKCB,PRKCE,RAPGEF2,CX3CR1,GIT2,PTPRS,DMPK,RHOT1,EPHA4,EPHB1,EPHB2,RPL22,LRRK2,CACNG3,BAIAP2,PPP1R9A,CLSTN1,SLC1A3,SLC6A1,SLC6A9,RGS14,SLC8A2…
GO: Biological Process	GO:0099177	regulation of trans-synaptic signaling		7.664E-13	7.323E-9	1.831E-10	1.784E-9	103	540	MAP1B,ADORA1,ADORA2A,LRFN2,SORCS2,TSHZ3,VPS18,GIT1,APBA1,APBA2,DGKE,PPFIA3,APP,TMEM108,NPAS4,ADGRB1,NAPA,NEUROD2,CACNA1A,CACNA1D,CAMK2B,NTRK2,IGSF11,SYT2,SYT7,SHISA9,OXTR,NEURL1,DGKI,PRKN,CDH1,CDH11,LGI1,DLGAP2,CACNA2D2,NRXN3,SSH1,PLCG1,SEPTIN5,EGLN1,CELSR1,PRKCB,PRKCE,RAPGEF2,CX3CR1,GIT2,PTPRS,DMPK,RHOT1,EPHA4,EPHB1,EPHB2,RPL22,LRRK2,CACNG3,BAIAP2,PPP1R9A,CLSTN1,SLC1A3,SLC6A1,SLC6A9,RGS14,SLC8A2…
GO: Biological Process	GO:0048646	anatomical structure formation involved in morphogenesis		1.536E-12	1.468E-8	3.580E-10	3.488E-9	204	1365	ACTA1,MBP,MCAM,ACTG1,ACVR1,ACVRL1,ADA,MEIS1,AXIN2,FZD7,SLC24A4,AKT1,FOXO4,SEMA6A,MMP14,MMP15,SHROOM3,ANK2,PIK3R3,EPB41L5,APOD,MSX1,PHOX2A,PLPP3,GRHL3,MYH3,MYH10,ADGRB1,ADGRB2,ADGRB3,NRP2,BMP7,NF2,NFATC2,NFE2,NFE2L2,NFIB,NFIX,SDK1,CDK5R2,NOTCH2,NOTCH4,NPHS1,CACNA1A,CACNA1S,NPR1,NRAP,CASQ1,SEMA5A,FMNL3,CD9,CD40,CD81,CDH1,CDH13,PDGFRB,ENPP2,CHAD,CARD10,ARHGAP22,NRXN3,HS6ST1,LMOD1,PLCG1,COL4A1,COL8A1…
GO: Biological Process	GO:0007610	behavior		1.754E-12	1.676E-8	3.990E-10	3.887E-9	128	739	BTBD9,ADA,MEIS1,MEIS2,ADORA1,FZD9,ADORA2A,PARP1,PTCHD1,ATXN3,UNC79,APBA1,APBA2,APP,ARCN1,SPTBN4,PDE8B,NCOA1,ZFHX3,ATP1A3,NPAS4,ADGRB3,BBS1,NEUROD2,AP1S2,SDK1,NPAS1,NPAS2,CACNA1A,CACNA1C,CACNA1E,SLC11A2,NTRK2,NR4A2,OPRD1,OSM,OXTR,DGKI,PRKN,PBX3,OTOG,PIRT,PENK,NRXN3,NRXN2,PITX3,CNTFR,SEPTIN5,CELSR1,PPT1,AUTS2,PRKCE,CX3CR1,KMT2B,DAB1,GIT2,DCTN1,PTPRZ1,DPP4,FEZF2,SOBP,ACE2,MYH14,CFAP69,RCAN2,EPHA4,EP…
GO: Biological Process	GO:0022610	biological adhesion		3.581E-12	3.422E-8	7.958E-10	7.753E-9	220	1516	MBP,MCAM,ACTG1,ACVR1,ACVRL1,ADA,TENM2,DSCAML1,FZD7,ADORA2A,ZNF608,ATXN3,AKT1,SEMA6A,MMP14,ANK3,APBA1,EPB41L5,APOD,APP,AP3B1,SCARF1,TNFSF11,MSLNL,PLPP3,SKAP1,ASS1,ZFHX3,MDGA1,MUC1,LRRC15,CADM3,MYH10,MYO10,NEXMIF,ADGRB1,NRP2,BMP7,NF2,PLEKHA7,VWA2,SDK1,NPHS1,COL6A6,SEMA5A,IGSF11,OPCML,CD9,CD81,CD151,CDH1,PCDH9,HACD1,CDH11,CDH13,MAGI1,PRTG,ENPP2,CYTH2,PARVB,LRFN4,NRXN3,NRXN2,GRAP2,PKP1,PLXNA1,CNN3,CN…
GO: Biological Process	GO:0007155	cell adhesion		7.076E-12	6.762E-8	1.537E-9	1.497E-8	218	1509	MBP,MCAM,ACTG1,ACVR1,ACVRL1,ADA,TENM2,DSCAML1,FZD7,ADORA2A,ZNF608,ATXN3,AKT1,SEMA6A,MMP14,ANK3,APBA1,EPB41L5,APOD,APP,AP3B1,SCARF1,TNFSF11,MSLNL,PLPP3,SKAP1,ASS1,ZFHX3,MDGA1,MUC1,CADM3,MYH10,MYO10,NEXMIF,ADGRB1,NRP2,BMP7,NF2,PLEKHA7,VWA2,SDK1,NPHS1,COL6A6,SEMA5A,IGSF11,OPCML,CD9,CD81,CD151,CDH1,PCDH9,HACD1,CDH11,CDH13,MAGI1,PRTG,ENPP2,CYTH2,PARVB,LRFN4,NRXN3,NRXN2,GRAP2,PKP1,PLXNA1,CNN3,CNTN1,ONE…
GO: Biological Process	GO:0099173	postsynapse organization		8.345E-12	7.974E-8	1.765E-9	1.719E-8	53	210	ABHD17A,ACTG1,FZD9,LRFN2,GIT1,TMEM108,MYH10,ADGRB1,NRP2,CAMK2B,INA,DLGAP1,ARHGAP22,LRFN4,SSH1,NRXN2,EGLN1,CHMP2B,DNM3,MAGI2,PTPRS,DLG2,DLG3,FARP1,EPHA4,EPHB1,EPHB2,EPHB3,LRRK2,ETV5,BAIAP2,SEMA3F,PPP1R9A,CNKSR2,ZNF365,RPH3A,SHANK2,FYN,LRRC4,GDNF,CUX2,RAPGEF4,GRID2,SRCIN1,TIAM1,GRIP2,CADM1,SHANK3,IGF1R,TANC1,IL1RAP,INSR,LRP5
GO: Biological Process	GO:0045596	negative regulation of cell differentiation		8.495E-12	8.118E-8	1.765E-9	1.719E-8	141	860	MCF2,ACVRL1,MEIS1,MEIS2,AXIN2,FZD7,ZNF608,FOXO4,SEMA6A,TRIB2,PI16,CITED1,APP,SEMA4G,MSX1,ARHGAP4,DACT3,ZFHX3,NEXMIF,BMP7,NFATC2,NFE2L2,LDLRAD4,NOTCH4,NPR2,LIMD1,SEMA5A,CTDSP1,PBX1,PAQR3,PRTG,ENPP1,CYTH2,GPR37L1,SEMA5B,PITX3,TJP2,SPDEF,TBX21,SOSTDC1,IRX3,BCAR1,NCOR2,FOXP4,AATK,CSPG4,DNM3,KDM4A,RAPGEF2,GLIS1,DAB2IP,ZNF536,DAB1,CASZ1,PTPRO,PTPRS,PTPRZ1,DIO3,DNMT1,FEZF2,DTX1,LIN28A,EFNB2,TRIM62,ELF5,…
GO: Biological Process	GO:0048729	tissue morphogenesis		1.862E-11	1.779E-7	3.785E-9	3.688E-8	140	861	MATN3,ACTA1,MBP,ACVR1,ACVRL1,FZD7,HEG1,MMP14,MMP15,SHROOM3,PLEKHA4,EPB41L5,AIRE,CITED1,MSX1,PLPP3,GRHL3,MYLK,NRP2,BMP7,NF2,VWA2,NOTCH2,NOTCH4,ROR1,BRSK2,SEMA5A,RIPK4,CD151,PAX7,PBX1,DNAAF1,CDH1,PLXNA1,COL4A1,COL8A1,ARHGEF19,COL11A1,TBX4,MAGED1,DLL4,PODXL,EGLN1,SOSTDC1,IRX3,CELSR1,HS2ST1,PRKAR1A,CTSD,MAP2K5,TCF7L1,PROX1,ARHGAP24,TRAF3IP1,IFT172,PSMA6,MTSS1,PSMB6,PSMB7,ZEB2,PTK7,MAGI2,RASIP1,SOX7,D…
GO: Biological Process	GO:1905114	cell surface receptor signaling pathway involved in cell-cell signaling		2.214E-11	2.116E-7	4.408E-9	4.294E-8	124	734	AXIN2,FZD7,ADORA1,FZD9,ADORA2A,AKT1,PLEKHA4,CITED1,APP,PLPP3,DACT3,TMEM108,TNKS,GRHL3,NPAS4,LIMD1,ROR1,NR4A2,SEMA5A,IGSF11,SHISA9,DGKI,PRKN,CDH1,DLGAP2,PDE6B,CHRM3,SSH1,PLCB3,PLCG2,ARHGEF19,SOSTDC1,ADGRA2,CELSR1,FAM53B,TCF7L1,DAB2IP,PSMA6,PSMB6,PSMB7,ZEB2,PTK7,MAGI2,SOX7,PTPRO,DMPK,RBX1,ZBTB33,GPC6,EDA,GSC,RNF220,ATP6AP2,CELA1,LGR6,LEF1,APC2,LRRK2,LGR4,SALL1,ZNRF3,ATXN1,GPC4,FGF8,FGFR3,GPC5,FGFR2…
GO: Biological Process	GO:0061061	muscle structure development		7.671E-11	7.330E-7	1.496E-8	1.457E-7	128	780	ACADM,ACTA1,ACTG1,ACVR1,MEIS1,MAP3K5,FZD7,HEG1,AKT1,FOXO4,MMP14,TSHZ3,ANK2,PI16,MSX1,ASS1,ZFHX3,MYH3,MYH10,MYLK,ADGRB1,ADGRB3,NEU2,NFATC2,NPHS1,CACNA1S,NRAP,CAPZB,CASQ1,CD9,NEURL1,CD81,PAX7,HACD1,LARGE1,CACNA2D2,PDGFRB,TRIP4,GTF3C5,LMOD1,CNTFR,AKAP6,COL11A1,DLL4,EGLN1,SOSTDC1,HINFP,RBFOX1,PRKAR1A,CTNNA2,PROX1,BOC,PSMA6,MTSS1,PTGFRN,NEK5,DMPK,DNMT1,TSC22D3,HBEGF,GSC,EFNB2,MYH14,LINC-PINT,LEF1,EPHB…
GO: Biological Process	GO:0120035	regulation of plasma membrane bounded cell projection organization		8.602E-11	8.220E-7	1.644E-8	1.602E-7	133	822	MAP1B,MAP6,MCF2,CSMD3,TENM2,RNF157,AKT1,SEMA6A,ENC1,CPNE5,SEMA4G,SCARF1,ARHGAP4,MAPK15,DOCK11,MYO10,ADGRB3,BMP7,MYO3A,NFE2L2,SDK1,CACNA1A,CAMK2B,NTRK2,BRSK2,CAPZB,SEMA5A,SYT2,ODF2,NEURL1,PRKN,MAP3K13,PAQR3,EVI5L,ENPP2,CYTH2,SEMA5B,TBC1D22A,PLXNA1,CNTN1,PRRX1,PODXL,AATK,CSPG4,ITSN2,DNM3,AUTS2,CTNNA2,RAPGEF2,CROCC,USP6NL,CUX1,DAB2IP,IFT140,KLK6,ARHGAP24,DAB1,ZEB2,PTK7,MAGI2,PTPRO,PTPRS,PTPRZ1,ULK4,…
GO: Biological Process	GO:0072359	circulatory system development		9.993E-11	9.549E-7	1.872E-8	1.824E-7	192	1323	ACACB,ACADM,MB,MCAM,ACVR1,ACVRL1,MEIS1,AXIN2,FZD7,HEG1,AKT1,FOXO4,SEMA6A,MMP14,ANK2,PI16,PIK3R3,CITED1,APOD,RBM20,MSX1,PLPP3,MYH10,MYLK,MYO1E,ADGRB1,ADGRB2,ADGRB3,NRP2,PRDM1,BMP7,NFATC2,NFE2,NFE2L2,NOTCH2,NOTCH4,CACNA1C,NPR1,NRAP,NTRK2,SEMA5A,FMNL3,OXCT1,OXTR,CD40,DNAAF1,CDH13,PDE2A,PDGFRB,ENPP2,CARD10,ARHGAP22,NRXN3,HS6ST1,PLCG1,AKAP6,COL4A1,COL8A1,COL8A2,PRRX1,COL11A1,TBX4,COL15A1,DLL4,EGLN1,AD…
GO: Biological Process	GO:0051094	positive regulation of developmental process		1.078E-10	1.030E-6	1.982E-8	1.930E-7	227	1633	ACACB,MAP1B,MAP6,ACVR1,ACVRL1,ADA,RNF157,AXIN2,MAP3K5,FZD9,PARP1,AKT1,SEMA6A,MMP14,TSHZ3,ENC1,AP3B1,CPNE5,SCARF1,SPTBN4,TNFSF11,SLC25A12,NCOA1,ZFHX3,ADGRB1,ADGRB2,ADGRB3,PRDM1,BMP7,BMPR1B,NEU2,NEUROD2,NF2,NFATC2,NFE2L2,MYRF,NOTCH2,NOTCH4,ZBTB7C,CAMK2B,NTRK2,NUMA1,SEMA5A,SYT2,RUNX2,OXTR,NEURL1,CD40,PRKN,MAP3K13,CACNA2D2,PDGFRB,ENPP2,GPR37L1,B4GALT5,PITX3,SPDEF,PLCG1,CMKLR1,IQGAP3,PLXNA1,CNTN1,AKAP…
GO: Biological Process	GO:0035239	tube morphogenesis		1.450E-10	1.385E-6	2.614E-8	2.547E-7	159	1045	MCAM,ACVR1,ACVRL1,MEIS1,HEG1,AKT1,FOXO4,SEMA6A,MMP14,SHROOM3,PIK3R3,EPB41L5,CITED1,APOD,GRHL3,MYLK,MYO1E,ADGRB1,ADGRB2,ADGRB3,NRP2,PRDM1,BMP7,NFE2L2,NFIB,NOTCH2,NOTCH4,NPR1,NTRK2,SEMA5A,FMNL3,CD40,PBX1,DNAAF1,CDH1,CDH13,PDGFRB,ENPP2,CARD10,ARHGAP22,NRXN3,HS6ST1,PLCG1,COL4A1,COL8A1,COL8A2,PRRX1,TBX4,COL15A1,MAGED1,DLL4,PODXL,EGLN1,SOSTDC1,IRX3,ADGRA2,FOXP4,CELSR1,HS2ST1,NUS1,CSPG4,PRKCB,RAPGEF2,CT…
GO: Biological Process	GO:0048589	developmental growth		1.700E-10	1.625E-6	3.009E-8	2.931E-7	132	822	ACACB,MAP1B,MATN3,MEIS1,RNF157,FZD7,FZD9,HEG1,AKT1,SEMA6A,UNC79,PI16,APBA1,APBA2,EPB41L5,APOD,APP,CPNE5,SEMA4G,SPTBN4,ARHGAP4,TMEM108,NRP2,BMPR1B,ZPR1,VWA2,WASF1,NOTCH2,CACNA1C,SEMA5A,SYT2,MAP7,CD9,PRKN,CD81,MAP3K13,PAX7,LARGE1,CDKN1C,PDE4D,CACNA2D2,PDGFRB,SEMA5B,FTO,PLXNA1,AKAP6,COL9A1,SELENOM,DUOX2,CHST11,AATK,ITSN2,AUTS2,PRKAR1A,PROX1,KLK6,PTGFRN,ZEB2,PTK7,MAGI2,PTPRS,DHCR7,DIO3,RAD51B,KIF26B,…
GO: Biological Process	GO:0031344	regulation of cell projection organization		1.970E-10	1.882E-6	3.423E-8	3.334E-7	133	832	MAP1B,MAP6,MCF2,CSMD3,TENM2,RNF157,AKT1,SEMA6A,ENC1,CPNE5,SEMA4G,SCARF1,ARHGAP4,MAPK15,DOCK11,MYO10,ADGRB3,BMP7,MYO3A,NFE2L2,SDK1,CACNA1A,CAMK2B,NTRK2,BRSK2,CAPZB,SEMA5A,SYT2,ODF2,NEURL1,PRKN,MAP3K13,PAQR3,EVI5L,ENPP2,CYTH2,SEMA5B,TBC1D22A,PLXNA1,CNTN1,PRRX1,PODXL,AATK,CSPG4,ITSN2,DNM3,AUTS2,CTNNA2,RAPGEF2,CROCC,USP6NL,CUX1,DAB2IP,IFT140,KLK6,ARHGAP24,DAB1,ZEB2,PTK7,MAGI2,PTPRO,PTPRS,PTPRZ1,ULK4,…
GO: Biological Process	GO:0006935	chemotaxis		2.572E-10	2.458E-6	4.390E-8	4.276E-7	116	697	TENM2,DSCAML1,UNC5A,MTUS1,SEMA6A,ANK3,APBB2,APP,SEMA4G,SPTBN4,TNFSF11,MYH10,TNFRSF11A,NRP2,BMP7,BMPR1B,NFIB,SEMA5A,CXCL16,CDH13,LGI1,PRTG,PDE4D,PDGFRB,ENPP2,NRXN3,SEMA5B,PIK3C2G,PLA2G1B,PLCG1,CMKLR1,PLP2,PLXNA1,MMP28,BCAR1,ADGRA2,CX3CR1,BOC,DAB1,PTAFR,JAML,PTPRM,PTPRO,FEZF2,HBEGF,RANBP9,EFNB2,MEGF8,LGR6,LEF1,EPHA4,EPHA8,EPHB1,EPHB2,EPHB3,EPHB6,ETV4,LGR4,EXT1,FCER1G,FGF1,CCL1,CCL3,FGF8,FGFR1,SEMA6…
GO: Biological Process	GO:0051961	negative regulation of nervous system development		3.106E-10	2.968E-6	5.207E-8	5.073E-7	74	376	MCF2,MEIS1,SEMA6A,APP,SEMA4G,ARHGAP4,MDGA1,NEXMIF,BMP7,NEUROD2,SEMA5A,CTDSP1,PBX1,PAQR3,PRTG,CYTH2,GPR37L1,SEMA5B,PITX3,IRX3,AATK,CSPG4,DNM3,KDM4A,RAPGEF2,ZNF536,TRAF3IP1,DAB1,CASZ1,PTPRO,PTPRS,PTPRZ1,DIO3,FEZF2,DTX1,RFX4,LIN28A,EFNB2,EPHA4,EPHB2,LRRK2,CDKL3,FGF13,FGFR3,SEMA6C,SEMA3F,SEMA4F,SEMA3C,ZHX2,ZNF365,SIRT2,SLIT1,CDK5RAP2,SORL1,SOX3,SOX10,NKX6-2,SPOCK1,FSTL4,XYLT1,KANK1,ABCC8,DENND5A,CIT,…
GO: Biological Process	GO:0060173	limb development		3.272E-10	3.127E-6	5.267E-8	5.131E-7	49	204	MSX1,MYH3,BMP7,BMPR1B,NOTCH2,CACNA1C,RUNX2,PBX1,PRRX1,TBX4,SLC39A3,CHST11,PRKAB1,IFT140,TRAF3IP1,IFT172,ECE1,MEGF8,LEF1,MECOM,FBN2,SALL1,ZNRF3,FMN1,FGF8,FGFR1,FGFR2,SEMA3C,FRAS1,FBXW4,SMARCA4,MAP3K20,GPC3,GLI2,GNAS,TBX5,TBX3,SIK3,NR2F2,RNF165,ALX4,HOXA9,CYP26B1,WNT3,ITGB4,AFF3,SALL4,LMX1B,LRP5
GO: Biological Process	GO:0048736	appendage development		3.272E-10	3.127E-6	5.267E-8	5.131E-7	49	204	MSX1,MYH3,BMP7,BMPR1B,NOTCH2,CACNA1C,RUNX2,PBX1,PRRX1,TBX4,SLC39A3,CHST11,PRKAB1,IFT140,TRAF3IP1,IFT172,ECE1,MEGF8,LEF1,MECOM,FBN2,SALL1,ZNRF3,FMN1,FGF8,FGFR1,FGFR2,SEMA3C,FRAS1,FBXW4,SMARCA4,MAP3K20,GPC3,GLI2,GNAS,TBX5,TBX3,SIK3,NR2F2,RNF165,ALX4,HOXA9,CYP26B1,WNT3,ITGB4,AFF3,SALL4,LMX1B,LRP5
GO: Biological Process	GO:0042330	taxis		3.359E-10	3.210E-6	5.267E-8	5.131E-7	116	700	TENM2,DSCAML1,UNC5A,MTUS1,SEMA6A,ANK3,APBB2,APP,SEMA4G,SPTBN4,TNFSF11,MYH10,TNFRSF11A,NRP2,BMP7,BMPR1B,NFIB,SEMA5A,CXCL16,CDH13,LGI1,PRTG,PDE4D,PDGFRB,ENPP2,NRXN3,SEMA5B,PIK3C2G,PLA2G1B,PLCG1,CMKLR1,PLP2,PLXNA1,MMP28,BCAR1,ADGRA2,CX3CR1,BOC,DAB1,PTAFR,JAML,PTPRM,PTPRO,FEZF2,HBEGF,RANBP9,EFNB2,MEGF8,LGR6,LEF1,EPHA4,EPHA8,EPHB1,EPHB2,EPHB3,EPHB6,ETV4,LGR4,EXT1,FCER1G,FGF1,CCL1,CCL3,FGF8,FGFR1,SEMA6…
GO: Biological Process	GO:0051093	negative regulation of developmental process		3.362E-10	3.213E-6	5.267E-8	5.131E-7	175	1194	MCF2,ACVRL1,MEIS1,MEIS2,AXIN2,FZD7,ZNF608,FOXO4,SEMA6A,TRIB2,PI16,CITED1,APP,SEMA4G,MSX1,ARHGAP4,DACT3,ZFHX3,MDGA1,NEXMIF,ADGRB1,ADGRB2,ADGRB3,BMP7,NEUROD2,NFATC2,NFE2,NFE2L2,NFIB,LDLRAD4,NOTCH4,NPR1,NPR2,LIMD1,SEMA5A,CTDSP1,PRKN,PBX1,PAQR3,PRTG,ENPP1,CYTH2,GPR37L1,CHAD,CARD10,SEMA5B,PITX3,TJP2,SPDEF,DLL4,TBX21,SOSTDC1,IRX3,BCAR1,NCOR2,FOXP4,AATK,CSPG4,DNM3,KDM4A,RAPGEF2,MAP2K5,GLIS1,CX3CR1,DAB2I…
GO: Biological Process	GO:0010975	regulation of neuron projection development		3.923E-10	3.749E-6	6.047E-8	5.891E-7	105	614	MAP1B,MAP6,MCF2,CSMD3,RNF157,AKT1,SEMA6A,ENC1,CPNE5,SEMA4G,SCARF1,ARHGAP4,ADGRB3,BMP7,NFE2L2,SDK1,CACNA1A,CAMK2B,NTRK2,BRSK2,SEMA5A,SYT2,NEURL1,PRKN,MAP3K13,PAQR3,CYTH2,SEMA5B,PLXNA1,CNTN1,PRRX1,AATK,CSPG4,ITSN2,DNM3,CTNNA2,RAPGEF2,CUX1,DAB2IP,KLK6,DAB1,ZEB2,PTK7,MAGI2,PTPRO,PTPRS,PTPRZ1,ULK4,FEZF2,EFNB2,MEGF8,FBXO31,EPHA4,EPHB2,EPHB3,LRRK2,CDKL3,FGF13,FGFR1,BAIAP2,SEMA6C,SEMA3F,SEMA4F,SEMA3C,SFR…
GO: Biological Process	GO:0009967	positive regulation of signal transduction		5.008E-10	4.786E-6	7.596E-8	7.401E-7	245	1823	PIK3AP1,ACVR1,ACVRL1,ADA,MAP3K4,AXIN2,MAP3K5,FZD7,ADORA1,FZD9,ADORA2A,PARP1,AKT1,IRS4,SH3RF1,PLEKHA4,CITED1,APP,ARAF,MADD,MSX1,ARHGAP4,TNFSF11,SKAP1,TMEM108,TNKS,MARCO,IL20RA,TNFRSF11A,TNFRSF10B,KSR1,BMP7,BMPR1B,NEUROD2,NMT1,WASF1,NOTCH2,NOTCH4,NPR1,NPR2,CAMK2B,NTRK2,ROR1,KSR2,NUMA1,SEMA5A,IGSF11,MAP3K6,OSM,NEURL1,CD40,DGKI,PRKN,CD81,MAP3K13,CDH13,CDKN1C,CRLF1,PDGFRB,BLNK,GPR37L1,CARD10,SSH1,DSTY…
GO: Biological Process	GO:0010721	negative regulation of cell development		6.145E-10	5.873E-6	9.176E-8	8.939E-7	78	411	MCF2,MEIS1,SEMA6A,PI16,APP,SEMA4G,ARHGAP4,NEXMIF,BMP7,NPR2,SEMA5A,CTDSP1,PBX1,PAQR3,PRTG,CYTH2,GPR37L1,SEMA5B,PITX3,TJP2,IRX3,BCAR1,AATK,CSPG4,DNM3,KDM4A,RAPGEF2,ZNF536,DAB1,CASZ1,PTPRO,PTPRS,PTPRZ1,DIO3,FEZF2,DTX1,LIN28A,EFNB2,EPHA4,EPHB2,LRRK2,CDKL3,FBLN1,FGF13,FGFR3,SEMA6C,SEMA3F,SEMA4F,SEMA3C,SHB,ZHX2,ZNF365,SIRT2,SLIT1,CDK5RAP2,FOXP1,SORL1,SOX3,SOX10,NKX6-2,SPOCK1,FSTL4,XYLT1,KANK1,ABCC8,DEN…
GO: Biological Process	GO:0050768	negative regulation of neurogenesis		6.660E-10	6.364E-6	9.791E-8	9.538E-7	70	353	MCF2,MEIS1,SEMA6A,APP,SEMA4G,ARHGAP4,NEXMIF,BMP7,SEMA5A,CTDSP1,PBX1,PAQR3,PRTG,CYTH2,GPR37L1,SEMA5B,PITX3,IRX3,AATK,CSPG4,DNM3,KDM4A,RAPGEF2,ZNF536,DAB1,CASZ1,PTPRO,PTPRS,PTPRZ1,DIO3,FEZF2,DTX1,LIN28A,EFNB2,EPHA4,EPHB2,LRRK2,CDKL3,FGF13,FGFR3,SEMA6C,SEMA3F,SEMA4F,SEMA3C,ZHX2,ZNF365,SIRT2,SLIT1,CDK5RAP2,SORL1,SOX3,SOX10,NKX6-2,SPOCK1,FSTL4,XYLT1,KANK1,ABCC8,DENND5A,CIT,NR2F1,TNR,WNT3,WNT7B,RTN4RL1…
GO: Biological Process	GO:0022603	regulation of anatomical structure morphogenesis		9.752E-10	9.319E-6	1.412E-7	1.376E-6	184	1289	MAP1B,MAP6,MBP,MCF2,ACVR1,ACVRL1,ADA,RNF157,FZD7,FOXO4,SEMA6A,SHROOM3,PLEKHA4,GAS7,CITED1,CPNE5,SEMA4G,MSX1,ARHGAP4,GRHL3,MYH10,MYO10,ADGRB1,ADGRB2,ADGRB3,BMP7,NFATC2,NFE2,NFE2L2,NFIB,NOTCH4,CACNA1A,NPR1,LIMD1,CAMK2B,NTRK2,ROR1,BRSK2,CAPZB,SEMA5A,SYT2,RUNX2,FMNL3,SH3D19,CD40,PRKN,MAP3K13,CDH1,ENPP2,CHAD,CARD10,PARVB,SEMA5B,PLCG1,PLXNA1,ARHGEF19,MAGED1,DLL4,EGLN1,BCAR1,ADGRA2,CELSR1,AATK,ITSN2,DNM…
GO: Biological Process	GO:0048870	cell motility		1.236E-9	1.181E-5	1.737E-7	1.692E-6	255	1932	MAP1B,MCAM,ACVR1,ACVRL1,ADA,ADORA1,MTUS1,AKT1,FOXO4,SEMA6A,MMP14,SH3RF1,PIK3R3,APBB2,EPB41L5,AIRE,APOD,APP,SEMA4G,ARHGAP4,TNFSF11,MAPK15,PHPT1,PLPP3,SKAP1,RAP2C,MDGA1,LRRC15,MYH10,MYLK,MYO10,NEXMIF,ADGRB1,BBS1,TNFRSF11A,TNFRSF10B,NRP2,BMP7,NF2,NFATC2,NFE2L2,CACNA1I,BRAT1,CDK5R2,LDLRAD4,CACNA1E,LIMD1,CAMK2B,NTRK2,NR4A2,SEMA5A,CXCL16,SLC7A7,FMNL3,CD9,NEURL1,CD40,CD81,CD151,CDH1,CDH13,CFAP251,PDE4D,…
GO: Biological Process	GO:0051674	localization of cell		1.236E-9	1.181E-5	1.737E-7	1.692E-6	255	1932	MAP1B,MCAM,ACVR1,ACVRL1,ADA,ADORA1,MTUS1,AKT1,FOXO4,SEMA6A,MMP14,SH3RF1,PIK3R3,APBB2,EPB41L5,AIRE,APOD,APP,SEMA4G,ARHGAP4,TNFSF11,MAPK15,PHPT1,PLPP3,SKAP1,RAP2C,MDGA1,LRRC15,MYH10,MYLK,MYO10,NEXMIF,ADGRB1,BBS1,TNFRSF11A,TNFRSF10B,NRP2,BMP7,NF2,NFATC2,NFE2L2,CACNA1I,BRAT1,CDK5R2,LDLRAD4,CACNA1E,LIMD1,CAMK2B,NTRK2,NR4A2,SEMA5A,CXCL16,SLC7A7,FMNL3,CD9,NEURL1,CD40,CD81,CD151,CDH1,CDH13,CFAP251,PDE4D,…
GO: Biological Process	GO:0021953	central nervous system neuron differentiation		1.673E-9	1.599E-5	2.317E-7	2.258E-6	50	220	UNCX,SPTBN4,PHOX2A,MDGA1,NRP2,NFIB,NFIX,CACNA1A,NTRK2,NR4A2,PAX7,CDH11,B4GALT5,DLL4,CHD5,RAPGEF2,PROX1,IFT172,ZEB2,FEZF2,SAMD4B,EPHA4,EPHB1,EPHB2,EPHB3,SALL1,ATXN2,FGF8,FGFR1,FGFR2,SFRP1,ATG7,SLIT1,SLIT3,GABRB1,SOX5,NKX6-2,SPOCK1,DISC1,GLI2,ARHGEF28,SZT2,FOXN4,GRID2,WNT3,SHANK3,BCL11B,IGHMBP2,GDPD5,LMX1B
GO: Biological Process	GO:0035107	appendage morphogenesis		1.855E-9	1.773E-5	2.497E-7	2.432E-6	43	175	MSX1,MYH3,BMP7,BMPR1B,NOTCH2,CACNA1C,RUNX2,PBX1,PRRX1,TBX4,CHST11,IFT140,TRAF3IP1,ECE1,MEGF8,LEF1,MECOM,FBN2,SALL1,FMN1,FGF8,FGFR1,FGFR2,SEMA3C,FRAS1,FBXW4,SMARCA4,MAP3K20,GPC3,GLI2,GNAS,TBX5,TBX3,SIK3,RNF165,ALX4,HOXA9,CYP26B1,WNT3,AFF3,SALL4,LMX1B,LRP5
GO: Biological Process	GO:0035108	limb morphogenesis		1.855E-9	1.773E-5	2.497E-7	2.432E-6	43	175	MSX1,MYH3,BMP7,BMPR1B,NOTCH2,CACNA1C,RUNX2,PBX1,PRRX1,TBX4,CHST11,IFT140,TRAF3IP1,ECE1,MEGF8,LEF1,MECOM,FBN2,SALL1,FMN1,FGF8,FGFR1,FGFR2,SEMA3C,FRAS1,FBXW4,SMARCA4,MAP3K20,GPC3,GLI2,GNAS,TBX5,TBX3,SIK3,RNF165,ALX4,HOXA9,CYP26B1,WNT3,AFF3,SALL4,LMX1B,LRP5
GO: Biological Process	GO:0030029	actin filament-based process		2.132E-9	2.038E-5	2.830E-7	2.757E-6	129	829	ACTA1,ACTG1,ADORA1,CRACD,ATXN3,MICAL3,SHROOM3,ANK2,APBB2,EPB41L5,GAS7,SPTBN4,PHPT1,ATP1A1,GRHL3,MYH3,MYH10,MYL4,MYO1E,ADGRB1,MYO3A,NF2,CACNA1G,WASF1,NOTCH2,NPHS1,CACNA1C,CACNA1D,NRAP,CAMK2B,BRSK2,CAPZB,CASQ1,SEMA5A,FMNL3,INA,PRKN,PDE4D,PDGFRB,CYTH2,PARVB,SSH1,SUN2,PLA2G1B,LMOD1,CNN3,AKAP6,ARHGEF19,BCAR1,CELSR1,AUTS2,PRKAR1A,PRKCE,CTNNA2,PROX1,MTSS1,AIF1L,ELMO1,PTK7,FARP2,PTPN1,ARHGAP25,IQSEC3,PDC…
GO: Biological Process	GO:0002009	morphogenesis of an epithelium		2.230E-9	2.131E-5	2.919E-7	2.844E-6	106	641	ACVR1,ACVRL1,FZD7,MMP14,SHROOM3,PLEKHA4,EPB41L5,AIRE,CITED1,GRHL3,BMP7,NOTCH2,NOTCH4,ROR1,BRSK2,SEMA5A,RIPK4,CD151,PBX1,DNAAF1,CDH1,PLXNA1,COL4A1,ARHGEF19,TBX4,MAGED1,DLL4,PODXL,SOSTDC1,IRX3,CELSR1,HS2ST1,CTSD,PROX1,ARHGAP24,TRAF3IP1,IFT172,PSMA6,MTSS1,PSMB6,PSMB7,ZEB2,PTK7,MAGI2,RASIP1,DLG3,FAT4,KIF26B,HBEGF,GPC6,EFNB2,MEGF8,LEF1,EPHA4,ETV4,LGR4,ETV5,DLC1,SALL1,ZNRF3,FMN1,GPC4,FGF1,FGF8,FGFR1,FG…
GO: Biological Process	GO:0007626	locomotory behavior		4.138E-9	3.954E-5	5.308E-7	5.171E-6	54	253	BTBD9,MEIS1,ADORA2A,APBA1,APBA2,APP,ARCN1,SPTBN4,ZFHX3,ATP1A3,NPAS2,CACNA1A,CACNA1C,CACNA1E,NR4A2,OPRD1,PRKN,PBX3,OTOG,PENK,PITX3,CELSR1,PPT1,PRKCE,DAB1,DPP4,FEZF2,SOBP,RCAN2,EPHA4,EPS8,LRRK2,ETV5,ATXN1,SCN8A,FGF12,ATG7,NPAS3,CDH23,GDNF,C1QL1,STRN,GNG7,ADGRL3,ANKH,TNR,SEZ6L,PARK7,TSHR,HTR2C,SHANK3,KCNMA1,NAV2,LMX1B
GO: Biological Process	GO:0023057	negative regulation of signaling		4.167E-9	3.982E-5	5.308E-7	5.171E-6	220	1636	PIK3AP1,ACVR1,ADA,ADCY9,AXIN2,ADORA1,FZD9,HEG1,SORCS2,AKT1,SEMA6A,MMP14,MNT,SH3RF1,GIT1,SLC25A5,CITED1,APOD,MADD,PHPT1,PDE8B,DACT3,MUC1,MARCO,TNK1,TNFRSF10B,PRDM1,BMP7,NF2,NFE2L2,CYP26C1,LDLRAD4,NOTCH4,LIMD1,CAMK2B,NR4A2,RUNX2,OPRD1,USP10,OSM,NEURL1,DGKI,PRKN,MOSMO,CDH1,PAQR3,PDE1C,PDE2A,PDE4D,ENPP1,GPR37L1,CHRM3,SGMS1,HJV,ONECUT2,NECAB2,UBQLN2,DLL4,RRM2B,EGLN1,SOSTDC1,CHST11,ADGRA2,NCOR2,PPP2R5C…
GO: Biological Process	GO:0072358	cardiovascular system development		4.221E-9	4.034E-5	5.308E-7	5.171E-6	136	897	MCAM,ACVR1,ACVRL1,MEIS1,HEG1,AKT1,FOXO4,SEMA6A,MMP14,PIK3R3,CITED1,APOD,PLPP3,MYH10,MYLK,MYO1E,ADGRB1,ADGRB2,ADGRB3,NRP2,PRDM1,BMP7,NFATC2,NFE2,NFE2L2,NOTCH2,NOTCH4,NPR1,NTRK2,SEMA5A,FMNL3,CD40,CDH13,PDE2A,PDGFRB,ENPP2,CARD10,ARHGAP22,NRXN3,HS6ST1,PLCG1,COL4A1,COL8A1,COL8A2,PRRX1,TBX4,COL15A1,DLL4,EGLN1,ADGRA2,NUS1,CSPG4,PRKCB,RAPGEF2,MAP2K5,CX3CR1,PROX1,DAB2IP,ARHGAP24,PTK7,RASIP1,PTPN14,PTPRM,D…
GO: Biological Process	GO:0016477	cell migration		4.747E-9	4.536E-5	5.891E-7	5.739E-6	233	1757	MAP1B,MCAM,ACVR1,ACVRL1,ADA,ADORA1,MTUS1,AKT1,FOXO4,SEMA6A,MMP14,SH3RF1,PIK3R3,APBB2,EPB41L5,AIRE,APOD,APP,SEMA4G,ARHGAP4,TNFSF11,MAPK15,PLPP3,SKAP1,RAP2C,MDGA1,LRRC15,MYH10,MYLK,NEXMIF,ADGRB1,BBS1,TNFRSF11A,TNFRSF10B,NRP2,BMP7,NF2,NFATC2,NFE2L2,BRAT1,CDK5R2,LDLRAD4,LIMD1,CAMK2B,NTRK2,NR4A2,SEMA5A,CXCL16,SLC7A7,FMNL3,CD9,CD40,CD81,CD151,CDH1,CDH13,PDE4D,PDGFRB,ENPP2,CARD10,SSH1,SEMA5B,PIK3C2B,PIK…
GO: Biological Process	GO:0006812	cation transport		4.984E-9	4.763E-5	6.106E-7	5.949E-6	196	1423	KCNH7,SLC24A3,ADA,TPCN1,ADORA1,ADORA2A,SLC24A4,AK4,AKT1,ABCD1,REM1,ANK1,ANK2,ANK3,SLC6A16,APP,AP3B1,SPTBN4,MAPK15,PHPT1,KCNK5,ATP1A1,ATP1A3,SLC4A4,AFG1L,MYLK,SLC39A11,CRACR2B,NDUFB5,CACNA1I,CACNA1G,CACNA1A,CACNA1C,CACNA1D,CACNA1E,CACNA1S,CACNG1,SLC11A2,ATP6V0E1,NSF,CAMK2B,CASQ1,SYT2,SYT7,OPRD1,SHISA9,SLC28A1,PRKN,HTR3B,PDE2A,PDE4D,PIRT,CACNA2D2,PDGFRB,PDZK1,AHNAK,PLA2G1B,PLCB3,PLCG1,PLCG2,SLC25A2…
GO: Biological Process	GO:0006836	neurotransmitter transport		5.214E-9	4.982E-5	6.306E-7	6.144E-6	65	333	ADA,ADORA2A,VPS18,GIT1,SLC6A16,PPFIA4,APBA1,APBA2,PPFIA3,APP,TNFSF11,SLC25A12,NAPA,CACNA1A,CACNA1D,NTRK2,SYT2,SYT7,DGKI,PRKN,NRXN3,NRXN2,OTOF,SEPTIN5,CELSR1,PPT1,ERC2,PRKCB,PRKCE,CTBP2,FEV,SNPH,GIT2,PTPRN2,RHOT1,STX2,LRRK2,FCER1G,SCN4A,PPP1R9A,SLC1A2,SLC1A3,RPH3A,SLC6A1,SLC6A8,SLC6A9,SLC6A11,SV2C,GDNF,SYK,SYN2,GPM6B,GRM4,PIP5K1C,SLC44A1,HRH3,PARK7,TRPC4,HTR2A,HTR2C,ICA1,SLC6A17,SLC38A1,KCNH1,SLC1…
GO: Biological Process	GO:0010648	negative regulation of cell communication		5.438E-9	5.196E-5	6.495E-7	6.328E-6	219	1632	PIK3AP1,ACVR1,ADA,ADCY9,AXIN2,ADORA1,FZD9,HEG1,SORCS2,AKT1,SEMA6A,MMP14,MNT,SH3RF1,GIT1,SLC25A5,CITED1,APOD,MADD,PHPT1,PDE8B,DACT3,MUC1,MARCO,TNK1,TNFRSF10B,PRDM1,BMP7,NF2,NFE2L2,CYP26C1,LDLRAD4,NOTCH4,LIMD1,CAMK2B,NR4A2,RUNX2,OPRD1,USP10,OSM,NEURL1,DGKI,PRKN,MOSMO,CDH1,PAQR3,PDE1C,PDE2A,PDE4D,ENPP1,GPR37L1,CHRM3,SGMS1,HJV,ONECUT2,NECAB2,UBQLN2,DLL4,RRM2B,EGLN1,SOSTDC1,CHST11,ADGRA2,NCOR2,PPP2R5C…
GO: Biological Process	GO:0051129	negative regulation of cellular component organization		6.178E-9	5.904E-5	7.289E-7	7.101E-6	126	818	MAP1B,MCF2,ACVRL1,SCAF4,FZD9,CRACD,PARP1,SCAMP5,AKT1,SEMA6A,MMP14,SLC25A5,APOD,APP,SEMA4G,SPTBN4,ARHGAP4,TNKS,MDGA1,LRSAM1,BMP7,NEUROD2,NFE2,LDLRAD4,CAPZB,SEMA5A,OPRD1,OSM,PRKN,PAQR3,EVI5L,CYTH2,SEMA5B,LMOD1,NECAB2,UBQLN2,POT1,PON1,BCAR1,MAD2L1BP,AATK,CSPG4,DNM3,PRKAR1A,KDM4A,CTNNA2,RAPGEF2,ARHGAP24,SNPH,TRAF3IP1,DAB1,PTPRO,PTPRS,PTPRZ1,DMRT1,PCSK9,DNMT1,DPP4,EFNB2,DYNC1LI1,EPHA4,EPHB2,EPS8,APC2,…
GO: Biological Process	GO:0045665	negative regulation of neuron differentiation		7.346E-9	7.020E-5	8.561E-7	8.340E-6	56	271	MCF2,MEIS1,SEMA6A,APP,SEMA4G,ARHGAP4,BMP7,SEMA5A,CTDSP1,PBX1,PAQR3,CYTH2,GPR37L1,SEMA5B,IRX3,AATK,CSPG4,DNM3,RAPGEF2,ZNF536,DAB1,CASZ1,PTPRO,PTPRS,PTPRZ1,DIO3,FEZF2,DTX1,EFNB2,EPHA4,EPHB2,LRRK2,CDKL3,FGF13,SEMA6C,SEMA3F,SEMA4F,SEMA3C,ZHX2,ZNF365,SLIT1,CDK5RAP2,SOX3,SPOCK1,FSTL4,XYLT1,KANK1,DENND5A,CIT,NR2F1,TNR,WNT3,RTN4RL1,RBPJ,SEMA3G,LRP1
GO: Biological Process	GO:0009792	embryo development ending in birth or egg hatching		7.496E-9	7.163E-5	8.630E-7	8.408E-6	127	829	ACVR1,ACVRL1,ADA,LRP1B,DSCAML1,ADCY9,AXIN2,HEG1,AKT1,MMP14,TSHZ3,SHROOM3,APBA1,APBA2,EPB41L5,CITED1,MSX1,NCOA1,GRHL3,MYH10,MYO1E,PRDM1,BMP7,NFE2,ZPR1,NMT1,NOTCH2,RUNX2,PAX7,PBX1,CDH1,CDKN1C,PDGFRB,PDZK1,KPNA7,HS6ST1,PLCG1,PRRX1,COL11A1,SLC39A3,ADAMTS3,EGLN1,CHST11,HINFP,NCOR2,CELSR1,SH3PXD2A,PROX1,TANC2,IFT140,ZFP42,TRAF3IP1,IFT172,MTSS1,MFRP,ZEB2,PTK7,SEC24D,PTPRR,ARNT2,RAD51B,HBEGF,ECE1,GSC,MEG…
GO: Biological Process	GO:0040007	growth		7.608E-9	7.270E-5	8.655E-7	8.432E-6	168	1182	ACACB,MAP1B,MATN3,ACVRL1,MEIS1,RNF157,FZD7,FZD9,PARP1,HEG1,AKT1,SEMA6A,MMP14,UNC79,PI16,APBA1,APBA2,APBB2,EPB41L5,APOD,APP,CPNE5,SEMA4G,SPTBN4,MSX1,ARHGAP4,DACT3,TMEM108,TNK1,NRP2,BMPR1B,NF2,ZPR1,BRAT1,VWA2,WASF1,NOTCH2,CACNA1C,NPR1,SEMA5A,CXCL16,IGSF11,SYT2,MAP7,OSM,CD9,PRKN,CD81,MAP3K13,PAX7,LGI1,LARGE1,CDKN1C,PDE4D,CACNA2D2,PDGFRB,ENPP1,SEMA5B,FTO,PLXNA1,AKAP6,COL9A1,SELENOM,DUOX2,CHST11,BCAR1…
GO: Biological Process	GO:0030326	embryonic limb morphogenesis		1.010E-8	9.656E-5	1.123E-6	1.094E-5	37	146	MSX1,MYH3,BMP7,NOTCH2,CACNA1C,RUNX2,PBX1,PRRX1,TBX4,CHST11,IFT140,TRAF3IP1,ECE1,MEGF8,LEF1,MECOM,FBN2,SALL1,FGF8,FGFR1,FRAS1,FBXW4,SMARCA4,MAP3K20,GPC3,GLI2,GNAS,TBX5,TBX3,ALX4,HOXA9,CYP26B1,WNT3,AFF3,SALL4,LMX1B,LRP5
GO: Biological Process	GO:0035113	embryonic appendage morphogenesis		1.010E-8	9.656E-5	1.123E-6	1.094E-5	37	146	MSX1,MYH3,BMP7,NOTCH2,CACNA1C,RUNX2,PBX1,PRRX1,TBX4,CHST11,IFT140,TRAF3IP1,ECE1,MEGF8,LEF1,MECOM,FBN2,SALL1,FGF8,FGFR1,FRAS1,FBXW4,SMARCA4,MAP3K20,GPC3,GLI2,GNAS,TBX5,TBX3,ALX4,HOXA9,CYP26B1,WNT3,AFF3,SALL4,LMX1B,LRP5
GO: Biological Process	GO:1903508	positive regulation of nucleic acid-templated transcription		1.039E-8	9.929E-5	1.141E-6	1.112E-5	229	1736	ACVR1,ACVRL1,TRRAP,MEIS1,MEIS2,MAP3K5,FZD7,PARP1,ARID1B,MTA3,AKT1,FOXO4,MNT,EBF4,AIRE,CITED1,APP,MSX1,PHOX2A,TNFSF11,SKAP1,NCOA1,ZFHX3,TNKS,GRHL3,RAP2C,MUC1,NPAS4,BMP7,BMPR1B,NEUROD2,BRDT,NFATC2,NFE2,NFE2L2,NFIB,NFIC,KLF9,NFIX,ZPR1,NFKBIB,NFYA,MYRF,NOTCH4,NPAS1,NPAS2,ZBTB7C,NUP98,NR4A2,RUNX2,OSM,OTX1,CD40,PRKN,CD81,PAX7,PBX1,PBX3,CDH1,CDH13,CDKN1C,TRIP4,RPRD1B,ZNF462,TAF7L,PITX3,PLA2G1B,SPDEF,HJV…
GO: Biological Process	GO:1902680	positive regulation of RNA biosynthetic process		1.092E-8	1.043E-4	1.186E-6	1.155E-5	229	1737	ACVR1,ACVRL1,TRRAP,MEIS1,MEIS2,MAP3K5,FZD7,PARP1,ARID1B,MTA3,AKT1,FOXO4,MNT,EBF4,AIRE,CITED1,APP,MSX1,PHOX2A,TNFSF11,SKAP1,NCOA1,ZFHX3,TNKS,GRHL3,RAP2C,MUC1,NPAS4,BMP7,BMPR1B,NEUROD2,BRDT,NFATC2,NFE2,NFE2L2,NFIB,NFIC,KLF9,NFIX,ZPR1,NFKBIB,NFYA,MYRF,NOTCH4,NPAS1,NPAS2,ZBTB7C,NUP98,NR4A2,RUNX2,OSM,OTX1,CD40,PRKN,CD81,PAX7,PBX1,PBX3,CDH1,CDH13,CDKN1C,TRIP4,RPRD1B,ZNF462,TAF7L,PITX3,PLA2G1B,SPDEF,HJV…
GO: Biological Process	GO:0071495	cellular response to endogenous stimulus		1.461E-8	1.396E-4	1.569E-6	1.528E-5	207	1542	MAP1B,SMC1A,ACTA1,ACVR1,ACVRL1,ADCY9,PARP1,ARID1B,AKT1,FOXO4,IRS4,GIT1,PIK3R3,EPB41L5,CITED1,APP,MSX1,SKAP1,ASS1,NCOA1,TMEM108,ATP1A1,ATP1A3,NPAS4,BMP7,BMPR1B,NFE2L2,KLF9,ZPR1,VWA2,WASF1,LDLRAD4,NOTCH2,CACNA1A,CACNA1S,ATP6V0E1,NTRK2,NUMA1,NR4A2,RUNX2,OPRD1,OXTR,NEURL1,PRKN,HTR3B,CDH1,CDKN1C,PDE2A,PDE4D,PDGFRB,ENPP1,PENK,CHRM3,TRIP4,SSH1,DSTYK,PITX3,DDX54,PLA2G1B,PLCG1,AKAP6,HJV,COL4A1,ONECUT2,COL…
GO: Biological Process	GO:0021537	telencephalon development		1.582E-8	1.512E-4	1.680E-6	1.637E-5	58	291	UNCX,NCOA1,TMEM108,MDGA1,MYH10,BBS1,NRP2,NF2,NFIB,CDK5R2,NTRK2,OXTR,SUN2,JAKMIP1,DPCD,NCOR2,CX3CR1,PROX1,DAB2IP,DAB1,ZEB2,PTPRS,ULK4,FAT4,FEZF2,CRTAC1,RFX4,LEF1,EPHB2,EPHB3,LRRK2,EXT1,SALL1,SCN5A,FGF8,FGF13,FGFR1,ATG7,SLC1A2,SLC8A1,SLC8A3,SLIT1,SLIT3,DMRTA2,DISC1,KIRREL3,SYNE2,KDM2B,SZT2,SUN1,NR2F1,TNR,RTN4RL1,SHANK3,BCL11B,BMERB1,LAMB1,LRP1
GO: Biological Process	GO:0048598	embryonic morphogenesis		1.629E-8	1.557E-4	1.699E-6	1.655E-5	108	681	MBP,ACVR1,DSCAML1,FZD7,MMP14,MMP15,SHROOM3,EPB41L5,MSX1,PLPP3,NCOA1,GRHL3,MYH3,BMP7,MYO3A,NF2,NOTCH2,CACNA1C,RUNX2,OTX1,PBX1,DNAAF1,CDKN1C,COL8A1,PRRX1,COL11A1,TBX4,SLC39A3,DLL4,CHST11,IRX3,FOXP4,CELSR1,HS2ST1,PRKAR1A,MAP2K5,PROX1,IFT140,TRAF3IP1,IFT172,ZEB2,PTK7,SOX7,SOBP,ECE1,GSC,MEGF8,OTOP1,ELF5,LEF1,EPHB2,IRX5,ESRRB,MECOM,PDZD7,EXT1,EYA2,FBN2,DLC1,SALL1,FGF8,FGFR1,FGFR2,FRAS1,SFRP1,FBXW4,SMAR…
GO: Biological Process	GO:0043009	chordate embryonic development		1.636E-8	1.563E-4	1.699E-6	1.655E-5	123	806	ACVR1,ACVRL1,ADA,LRP1B,DSCAML1,ADCY9,AXIN2,HEG1,AKT1,MMP14,TSHZ3,SHROOM3,APBA1,APBA2,EPB41L5,CITED1,MSX1,NCOA1,GRHL3,MYH10,MYO1E,PRDM1,BMP7,NFE2,ZPR1,NMT1,NOTCH2,RUNX2,PAX7,PBX1,CDH1,CDKN1C,PDGFRB,PDZK1,KPNA7,HS6ST1,PLCG1,PRRX1,COL11A1,SLC39A3,ADAMTS3,EGLN1,CHST11,HINFP,NCOR2,CELSR1,SH3PXD2A,PROX1,TANC2,IFT140,ZFP42,TRAF3IP1,IFT172,MTSS1,ZEB2,PTK7,SEC24D,PTPRR,ARNT2,RAD51B,HBEGF,ECE1,GSC,MEGF8,AT…
GO: Biological Process	GO:0001944	vasculature development		1.850E-8	1.768E-4	1.901E-6	1.852E-5	132	884	MCAM,ACVR1,ACVRL1,MEIS1,HEG1,AKT1,FOXO4,SEMA6A,MMP14,PIK3R3,CITED1,APOD,PLPP3,MYH10,MYLK,MYO1E,ADGRB1,ADGRB2,ADGRB3,NRP2,PRDM1,BMP7,NFATC2,NFE2,NFE2L2,NOTCH2,NOTCH4,NPR1,NTRK2,SEMA5A,FMNL3,CD40,CDH13,PDE2A,PDGFRB,ENPP2,CARD10,ARHGAP22,NRXN3,HS6ST1,PLCG1,COL4A1,COL8A1,COL8A2,PRRX1,TBX4,COL15A1,DLL4,EGLN1,ADGRA2,NUS1,CSPG4,PRKCB,RAPGEF2,MAP2K5,CX3CR1,PROX1,DAB2IP,ARHGAP24,PTK7,RASIP1,PTPN14,PTPRM,D…
GO: Biological Process	GO:0023061	signal release		2.105E-8	2.012E-4	2.124E-6	2.069E-5	93	562	ADORA1,ADORA2A,VPS18,GIT1,SLC25A5,PPFIA4,APBA1,APBA2,PPFIA3,APP,MADD,TNFSF11,PHPT1,PDE8B,NAPA,CACNA1A,CACNA1C,CACNA1D,CACNA1E,NTRK2,BRSK2,SYT2,SYT7,OSM,OXCT1,DGKI,PRKN,CDK16,PDE1C,CACNA2D2,NRXN3,NRXN2,OTOF,SEPTIN5,SELENOM,CELSR1,PPT1,ERC2,PRKCB,PRKCE,CTBP2,RAB11FIP3,SNPH,GIT2,PTPRN2,DPP4,SIDT2,RHOT1,STX2,LRRK2,FGFR1,SFRP1,ATG7,ITSN1,PPP1R9A,RAB11FIP2,UQCC2,RAB11FIP1,RPH3A,SLC6A9,ILDR2,SREBF1,NMU,…
GO: Biological Process	GO:0016055	Wnt signaling pathway		2.112E-8	2.018E-4	2.124E-6	2.069E-5	91	546	AXIN2,FZD7,FZD9,PLEKHA4,CITED1,APP,PLPP3,DACT3,TNKS,GRHL3,LIMD1,ROR1,NR4A2,SEMA5A,PRKN,CDH1,PDE6B,PLCB3,PLCG2,ARHGEF19,SOSTDC1,ADGRA2,CELSR1,FAM53B,TCF7L1,DAB2IP,PSMA6,PSMB6,PSMB7,ZEB2,PTK7,MAGI2,SOX7,PTPRO,RBX1,ZBTB33,GPC6,EDA,GSC,RNF220,ATP6AP2,CELA1,LGR6,LEF1,APC2,LRRK2,LGR4,SALL1,ZNRF3,GPC4,FGF8,FGFR3,GPC5,FGFR2,BICC1,ZNF703,SFRP1,FBXW4,ANKRD6,PRICKLE2,SMARCA4,SOX10,AGO2,WWOX,DISC1,STRN,KANK1…
GO: Biological Process	GO:0034330	cell junction organization		2.452E-8	2.343E-4	2.440E-6	2.377E-5	60	309	ACTG1,ACVRL1,HEG1,MMP14,ANK2,EPB41L5,APOD,CADM3,NF2,AJM1,PLEKHA7,SDK1,CD9,CD151,CDH1,CDH11,CDH13,ENPP2,PKP1,COL16A1,CSK,PRKCH,RAPGEF2,MTSS1,PTPRO,NECTIN2,PDCD6IP,DSG2,ACE2,PATJ,DLC1,FMN1,ZNF703,SFRP1,HDAC7,LIMCH1,PARD6G,NFASC,CLASP2,PARD6B,STRN,ABCC8,MAPRE2,GPM6B,RAPGEF1,PIP5K1C,CDH22,PKP3,RASSF8,TNS1,CORO1C,CADM1,WNT11,ITGA5,ITGB4,KIFC3,GPBAR1,LRP1,SMAD3,SMAD7
GO: Biological Process	GO:0198738	cell-cell signaling by wnt		2.523E-8	2.411E-4	2.486E-6	2.422E-5	91	548	AXIN2,FZD7,FZD9,PLEKHA4,CITED1,APP,PLPP3,DACT3,TNKS,GRHL3,LIMD1,ROR1,NR4A2,SEMA5A,PRKN,CDH1,PDE6B,PLCB3,PLCG2,ARHGEF19,SOSTDC1,ADGRA2,CELSR1,FAM53B,TCF7L1,DAB2IP,PSMA6,PSMB6,PSMB7,ZEB2,PTK7,MAGI2,SOX7,PTPRO,RBX1,ZBTB33,GPC6,EDA,GSC,RNF220,ATP6AP2,CELA1,LGR6,LEF1,APC2,LRRK2,LGR4,SALL1,ZNRF3,GPC4,FGF8,FGFR3,GPC5,FGFR2,BICC1,ZNF703,SFRP1,FBXW4,ANKRD6,PRICKLE2,SMARCA4,SOX10,AGO2,WWOX,DISC1,STRN,KANK1…
GO: Biological Process	GO:0007167	enzyme linked receptor protein signaling pathway		2.567E-8	2.453E-4	2.503E-6	2.438E-5	159	1123	ACTG1,ACVR1,ACVRL1,ADORA1,PARP1,AKT1,FOXO4,SEMA6A,IRS4,GIT1,PIK3R3,CITED1,APOD,APP,MSX1,TMEM108,MYO1E,NRP2,BMP7,BMPR1B,VWA2,WASF1,LDLRAD4,NOTCH2,NPR1,NPR2,ATP6V0E1,NTRK2,ROR1,NUMA1,RUNX2,NEURL1,REPS2,CDH13,CDKN1C,PDGFRB,ENPP1,BLNK,DSTYK,PLCG1,HJV,COL4A1,ONECUT2,ADAMTS3,POLR2F,NRG2,SOSTDC1,CHST11,BCAR1,ADGRA2,NUS1,CSPG4,PRKCB,RAPGEF2,DAB2IP,HTRA1,RASSF2,MTSS1,ELMO1,MAGI2,PTPN1,PTPRR,FAM83G,DMRT1,F…
GO: Biological Process	GO:0060541	respiratory system development		2.602E-8	2.486E-4	2.511E-6	2.447E-5	53	259	ADA,HEG1,MMP14,TSHZ3,ASS1,NFIB,NUMA1,DNAAF1,PDGFRB,HS6ST1,SPDEF,TBX4,ADAMTS2,NCOR2,FOXP4,CELSR1,CTSD,CUX1,PROX1,PTK7,DHCR7,CRISPLD2,EDA,LEF1,SPEG,MEG3,ATXN1,FGF1,FGF8,FGFR1,FGFR3,TAB1,FGFR2,SRSF6,SIM2,FOXP1,SPARC,SREBF1,MAPK8IP3,GPC3,GLI2,TBX5,THRA,HMGB1,TNS3,FNDC3B,WNT7B,WNT11,ZIC3,RBPJ,KCNAB1,HMGA2,RCN3
GO: Biological Process	GO:0071363	cellular response to growth factor stimulus		2.822E-8	2.696E-4	2.696E-6	2.627E-5	117	763	MAP1B,ACVR1,ACVRL1,PARP1,AKT1,SEMA6A,GIT1,EPB41L5,CITED1,APP,MSX1,SKAP1,TMEM108,NRP2,BMP7,BMPR1B,ZPR1,WASF1,LDLRAD4,NOTCH2,NTRK2,NUMA1,RUNX2,OPRD1,CDKN1C,PDE2A,PDGFRB,PENK,DSTYK,PITX3,PLCG1,HJV,ONECUT2,ADAMTS3,DLL4,POLR2F,SOSTDC1,CHST11,BCAR1,ADGRA2,NUS1,PRKCB,PRKCE,RAPGEF2,MAP2K5,CX3CR1,DAB2IP,HTRA1,MAGI2,PTPN1,FAM83G,DNMT1,FAT4,MEGF8,DYNC1LI1,LEF1,MTSS2,LRG1,ZBTB7A,FBN2,FGF1,FGF8,FGF12,FGFR1,FG…
GO: Biological Process	GO:0051962	positive regulation of nervous system development		3.012E-8	2.878E-4	2.824E-6	2.751E-5	105	664	MAP1B,MAP6,RNF157,SEMA6A,ENC1,CPNE5,SCARF1,SLC25A12,NCOA1,ADGRB1,ADGRB2,ADGRB3,BMP7,NEUROD2,NFE2L2,MYRF,CAMK2B,NTRK2,SEMA5A,SYT2,OXTR,NEURL1,PRKN,MAP3K13,ENPP2,GPR37L1,PITX3,PLXNA1,CNTN1,IRX3,RGS6,ITSN2,PRKCH,KDM4A,RAPGEF2,CUX1,CX3CR1,PROX1,DAB2IP,DAB1,ZEB2,PTK7,MAGI2,PTPRZ1,FEZF2,LIN28A,MEGF8,FBXO31,EPHA4,EPHB1,EPHB2,EPHB3,CDKL3,ETV5,SALL1,ATXN1,CCL3,FGFR1,BAIAP2,ITSN1,PPP1R9A,SH3GL3,ADGRL1,CLST…
GO: Biological Process	GO:0030324	lung development		3.014E-8	2.881E-4	2.824E-6	2.751E-5	48	225	ADA,HEG1,MMP14,TSHZ3,NFIB,NUMA1,DNAAF1,PDGFRB,HS6ST1,SPDEF,TBX4,ADAMTS2,NCOR2,FOXP4,CELSR1,CTSD,CUX1,PROX1,PTK7,DHCR7,CRISPLD2,MEG3,ATXN1,FGF1,FGF8,FGFR1,FGFR3,TAB1,FGFR2,SRSF6,SIM2,FOXP1,SPARC,SREBF1,MAPK8IP3,GPC3,GLI2,TBX5,THRA,HMGB1,TNS3,FNDC3B,WNT7B,WNT11,ZIC3,RBPJ,HMGA2,RCN3
GO: Biological Process	GO:0009719	response to endogenous stimulus		3.329E-8	3.181E-4	3.089E-6	3.009E-5	237	1834	ABCA2,MAP1B,SMC1A,MB,ACTA1,ACVR1,ACVRL1,ADCY9,PARP1,ARID1B,AKT1,FOXO4,MMP14,MMP15,IRS4,GIT1,PIK3R3,EPB41L5,CITED1,APP,MSX1,MAPK15,SKAP1,ASS1,NCOA1,ZFHX3,TMEM108,ATP1A1,ATP1A3,CATSPERG,NPAS4,BMP7,BMPR1B,NFE2L2,KLF9,ZPR1,VWA2,WASF1,LDLRAD4,NOTCH2,CACNA1A,CACNA1S,ATP6V0E1,NTRK2,NUMA1,NR4A2,RUNX2,OPRD1,OXCT1,OXTR,CD9,NEURL1,PRKN,CD81,HTR3B,CDH1,CDH13,CDKN1C,PDE2A,PDE4D,PDGFRB,ENPP1,PENK,PFKFB1,CHRM3,…
GO: Biological Process	GO:0006811	ion transport		3.497E-8	3.342E-4	3.213E-6	3.131E-5	250	1956	ABCA2,KCNH7,ABCA4,ACACB,SLC24A3,ADA,TPCN1,ADORA1,ADORA2A,SLC24A4,SFXN2,AK4,AKT1,ABCD1,UNC79,REM1,ANK1,ANK2,ANK3,OSTM1,SLC25A5,SLC6A16,PPFIA4,APBA1,PPFIA3,APP,AP3B1,SPTBN4,TNFSF11,MAPK15,SLC25A12,PHPT1,KCNK5,NCOA1,ATP1A1,ATP1A3,SLC4A4,AFG1L,ABCC3,MYLK,SLC39A11,TNFRSF11A,CRACR2B,NDUFB5,CACNA1I,CACNA1G,CA6,CACNA1A,CACNA1C,ATP8B3,CACNA1D,CACNA1E,CACNA1S,CACNG1,SLC11A2,ATP6V0E1,NSF,CAMK2B,NTRK2,CASQ1,…
GO: Biological Process	GO:0034220	ion transmembrane transport		3.668E-8	3.505E-4	3.316E-6	3.231E-5	197	1469	ABCA2,KCNH7,ABCA4,ACACB,SLC24A3,TPCN1,SLC24A4,SFXN2,AK4,AKT1,ABCD1,UNC79,REM1,ANK2,ANK3,OSTM1,SLC25A5,SLC6A16,APP,SLC25A12,PHPT1,KCNK5,ATP1A1,ATP1A3,SLC4A4,AFG1L,ABCC3,SLC39A11,NDUFB5,CACNA1I,CACNA1G,CACNA1A,CACNA1C,CACNA1D,CACNA1E,CACNA1S,CACNG1,SLC11A2,ATP6V0E1,CASQ1,CLIC6,SLC7A7,SHISA9,SLC28A1,HTR3B,PDE2A,PDE4D,PIRT,CACNA2D2,PDZK1,BEST3,CLCN2,CLCN6,AHNAK,PLCB3,PLCG1,PLCG2,STOML3,PLP2,SLC25A23,…
GO: Biological Process	GO:0099558	maintenance of synapse structure		3.695E-8	3.531E-4	3.316E-6	3.231E-5	14	28	GIT1,ADGRB3,BSN,DLGAP1,ERC2,CTBP2,DCTN1,MAGI2,DLG2,DLG3,SHANK2,C1QL1,CADM1,SHANK3
GO: Biological Process	GO:0098655	cation transmembrane transport		3.713E-8	3.548E-4	3.316E-6	3.231E-5	160	1138	KCNH7,SLC24A3,TPCN1,SLC24A4,AK4,ABCD1,REM1,ANK2,ANK3,SLC6A16,APP,PHPT1,KCNK5,ATP1A1,ATP1A3,SLC4A4,AFG1L,SLC39A11,NDUFB5,CACNA1I,CACNA1G,CACNA1A,CACNA1C,CACNA1D,CACNA1E,CACNA1S,CACNG1,SLC11A2,ATP6V0E1,CASQ1,SHISA9,SLC28A1,HTR3B,PDE2A,PDE4D,PIRT,CACNA2D2,PDZK1,AHNAK,PLCB3,PLCG1,PLCG2,SLC25A23,CNGA3,MCOLN2,AKAP6,SLC39A3,SLC39A2,SLC31A1,SLC30A7,PLCH2,PRKCE,PIEZO1,CNIH3,DLG2,DLG3,MCUB,PCSK9,DPP6,ANO10…
GO: Biological Process	GO:0070848	response to growth factor		4.268E-8	4.079E-4	3.777E-6	3.679E-5	120	794	MAP1B,ACVR1,ACVRL1,MEIS2,PARP1,AKT1,SEMA6A,GIT1,EPB41L5,CITED1,APP,MSX1,SKAP1,ZFHX3,TMEM108,NRP2,BMP7,BMPR1B,ZPR1,WASF1,LDLRAD4,NOTCH2,NTRK2,NUMA1,RUNX2,OPRD1,CDKN1C,PDE2A,PDGFRB,PENK,DSTYK,PITX3,PLCG1,HJV,ONECUT2,ADAMTS3,DLL4,POLR2F,SOSTDC1,CHST11,BCAR1,ADGRA2,NUS1,PRKCB,PRKCE,RAPGEF2,MAP2K5,CX3CR1,DAB2IP,HTRA1,MAGI2,PTPN1,FAM83G,DNMT1,FAT4,MEGF8,DYNC1LI1,ELK1,LEF1,MTSS2,LRG1,ZBTB7A,FBN2,FGF1,FG…
GO: Biological Process	GO:0045893	positive regulation of transcription, DNA-templated		4.605E-8	4.400E-4	4.037E-6	3.933E-5	216	1647	ACVR1,ACVRL1,MEIS1,MEIS2,MAP3K5,FZD7,PARP1,ARID1B,AKT1,FOXO4,EBF4,AIRE,CITED1,APP,MSX1,PHOX2A,TNFSF11,SKAP1,NCOA1,ZFHX3,TNKS,GRHL3,MUC1,NPAS4,BMP7,BMPR1B,NEUROD2,BRDT,NFATC2,NFE2,NFE2L2,NFIB,NFIC,KLF9,NFIX,ZPR1,NFYA,MYRF,NOTCH4,NPAS1,NPAS2,ZBTB7C,NR4A2,RUNX2,OSM,OTX1,CD40,PRKN,CD81,PAX7,PBX1,PBX3,CDH1,CDH13,CDKN1C,TRIP4,RPRD1B,ZNF462,PITX3,PLA2G1B,SPDEF,HJV,ONECUT2,PRRX1,TBX4,MAGED1,EGLN1,TBX21,C…
GO: Biological Process	GO:0030323	respiratory tube development		5.374E-8	5.135E-4	4.668E-6	4.548E-5	48	229	ADA,HEG1,MMP14,TSHZ3,NFIB,NUMA1,DNAAF1,PDGFRB,HS6ST1,SPDEF,TBX4,ADAMTS2,NCOR2,FOXP4,CELSR1,CTSD,CUX1,PROX1,PTK7,DHCR7,CRISPLD2,MEG3,ATXN1,FGF1,FGF8,FGFR1,FGFR3,TAB1,FGFR2,SRSF6,SIM2,FOXP1,SPARC,SREBF1,MAPK8IP3,GPC3,GLI2,TBX5,THRA,HMGB1,TNS3,FNDC3B,WNT7B,WNT11,ZIC3,RBPJ,HMGA2,RCN3
GO: Biological Process	GO:0001568	blood vessel development		5.623E-8	5.373E-4	4.841E-6	4.716E-5	126	849	MCAM,ACVR1,ACVRL1,MEIS1,HEG1,AKT1,FOXO4,SEMA6A,MMP14,PIK3R3,CITED1,APOD,PLPP3,MYH10,MYLK,MYO1E,ADGRB1,ADGRB2,ADGRB3,NRP2,PRDM1,BMP7,NFE2,NFE2L2,NOTCH2,NOTCH4,NPR1,NTRK2,SEMA5A,FMNL3,CD40,CDH13,PDE2A,PDGFRB,ENPP2,CARD10,ARHGAP22,NRXN3,HS6ST1,PLCG1,COL4A1,COL8A1,COL8A2,PRRX1,TBX4,COL15A1,DLL4,EGLN1,ADGRA2,NUS1,CSPG4,PRKCB,RAPGEF2,MAP2K5,CX3CR1,PROX1,DAB2IP,ARHGAP24,PTK7,RASIP1,PTPRM,DHCR7,HBEGF,EFN…
GO: Biological Process	GO:0042692	muscle cell differentiation		6.475E-8	6.187E-4	5.524E-6	5.382E-5	78	455	ACADM,ACTA1,ACTG1,ACVR1,FZD7,AKT1,FOXO4,MMP14,TSHZ3,ANK2,PI16,MSX1,MYH3,MYH10,ADGRB1,ADGRB3,NEU2,NFATC2,NPHS1,CACNA1S,NRAP,CAPZB,CASQ1,CD9,CD81,HACD1,CACNA2D2,PDGFRB,LMOD1,AKAP6,PRKAR1A,CTNNA2,PROX1,BOC,PTGFRN,NEK5,DMPK,DNMT1,EFNB2,SPEG,OBSCN,RXRB,EHD2,FGFR2,FLT3LG,ATG7,FHOD3,SLC8A1,WFIKKN1,ANKRD1,SMARCA2,SMARCA4,FOXP1,MEGF10,SIK1,PDCD4,SUPT6H,TBXT,POPDC3,MYO18B,TBX5,TBX3,TCF3,SYNE1,TMEM119,THRA,…
GO: Biological Process	GO:0007416	synapse assembly		6.892E-8	6.586E-4	5.828E-6	5.678E-5	44	203	MAP1B,APP,MDGA1,NPAS4,ADGRB1,ADGRB2,ADGRB3,BSN,SDK1,CACNA1A,NTRK2,OXTR,CDH1,LRFN4,NRXN3,NRXN2,NRG2,DNM3,MAGI2,PTPRS,EFNB2,FARP1,EPHB1,EPHB2,EPHB3,GPC4,PPP1R9A,ADGRL1,CLSTN1,SHANK2,SLIT1,CLSTN2,LRRC4,KIRREL3,SLITRK2,VSTM5,ADGRL3,CUX2,GRID2,THBS2,CADM1,FLRT3,SHANK3,IL1RAP
GO: Biological Process	GO:0035637	multicellular organismal signaling		7.133E-8	6.817E-4	5.980E-6	5.825E-5	47	224	ANK2,ANK3,SPTBN4,ATP1A1,ATP1A3,CACNA1I,CACNA1G,CACNA1A,CACNA1C,CACNA1D,CACNA1E,CACNA1S,NPR1,NPR2,CACNG1,NTRK2,CASQ1,PDE4D,CACNA2D2,DMPK,DPP6,DSG2,ACE2,MYH14,KCNIP3,KCNIP1,CACNG3,SCN4A,SCN5A,SCN8A,FGF12,SLC8A2,SLC8A1,SLC8A3,CORIN,CACNG5,NFASC,RAPGEF4,TNR,ITPR1,ITPR2,ITPR3,KCNA5,KCND3,KCNH2,KCNMA1,KCNQ1
GO: Biological Process	GO:0060560	developmental growth involved in morphogenesis		8.236E-8	7.870E-4	6.843E-6	6.667E-5	54	275	MAP1B,RNF157,SEMA6A,EPB41L5,APP,CPNE5,SEMA4G,ARHGAP4,TMEM108,NRP2,WASF1,SEMA5A,SYT2,PRKN,MAP3K13,SEMA5B,PLXNA1,AATK,ITSN2,AUTS2,ZEB2,PTK7,MAGI2,PTPRS,KIF26B,MEGF8,CDKL3,SALL1,FMN1,FGF1,FGF13,FGFR2,SEMA6C,SEMA3F,SEMA4F,SEMA3C,SFRP1,CYFIP2,SLIT1,SLIT3,DISC1,FSTL4,CLASP2,TIAM1,TTL,TNR,MGLL,CADM1,FLRT3,WNT3,WNT7B,WNT11,SEMA3G,LRP1
GO: Biological Process	GO:0050890	cognition		8.405E-8	8.032E-4	6.924E-6	6.746E-5	65	357	BTBD9,MEIS2,ADORA1,FZD9,PTCHD1,APP,PDE8B,ATP1A3,NPAS4,ADGRB3,RTL4,NEUROD2,AP1S2,CACNA1C,CACNA1E,SLC11A2,NTRK2,OXTR,DGKI,PRKN,NRXN3,NRXN2,JAKMIP1,CHMP2B,PPT1,CX3CR1,KMT2B,PTPRZ1,DOP1B,SOBP,RP9,RCAN2,EPHB2,ATP8A1,ATXN1,FGF13,SLC6A1,RGS14,SLC8A2,SLC8A3,SHANK2,SORCS3,FYN,JPH4,C1QL1,ABCC8,GNAS,CUX2,GRM4,TAFA2,THRA,TNR,HRH3,HRH1,HTR2A,SHANK3,TANC1,INSR,ITGA5,ITPR3,KCNAB1,KIT,LAMB1,LMX1B,JPH3
GO: Biological Process	GO:0030111	regulation of Wnt signaling pathway		9.421E-8	9.003E-4	7.676E-6	7.478E-5	68	381	AXIN2,FZD7,FZD9,PLEKHA4,CITED1,APP,PLPP3,DACT3,TNKS,LIMD1,SEMA5A,PRKN,CDH1,SOSTDC1,ADGRA2,FAM53B,TCF7L1,DAB2IP,PSMA6,PSMB6,PSMB7,ZEB2,PTK7,SOX7,PTPRO,RBX1,EDA,GSC,RNF220,ATP6AP2,LGR6,LEF1,APC2,LRRK2,LGR4,SALL1,ZNRF3,FGFR3,GPC5,FGFR2,BICC1,ZNF703,SFRP1,ANKRD6,SMARCA4,SOX10,WWOX,DISC1,KANK1,SULF2,GPC3,RBMS3,TCF7L2,GRB10,RAPGEF1,THRA,TIAM1,WIF1,NRARP,UBE2B,WNT3,WNT11,NKD2,RBPJ,WNK2,HMGA2,LRP1,SMAD3
GO: Biological Process	GO:0051254	positive regulation of RNA metabolic process		9.478E-8	9.057E-4	7.676E-6	7.478E-5	234	1829	ACVR1,ACVRL1,TRRAP,MEIS1,MEIS2,MAP3K5,FZD7,PARP1,ARID1B,MTA3,AKT1,FOXO4,MNT,EBF4,AIRE,CITED1,APP,RBM20,MSX1,PHOX2A,TNFSF11,SKAP1,NCOA1,ZFHX3,TNKS,GRHL3,RAP2C,MUC1,NPAS4,BMP7,BMPR1B,NEUROD2,BRDT,NFATC2,NFE2,NFE2L2,NFIB,NFIC,KLF9,NFIX,ZPR1,NFKBIB,NFYA,MYRF,NOTCH4,NPAS1,NPAS2,ZBTB7C,NUP98,NR4A2,RUNX2,OSM,OTX1,CD40,PRKN,CD81,PAX7,PBX1,PBX3,CDH1,CDH13,CDKN1C,TRIP4,RPRD1B,ZNF462,TAF7L,PITX3,PLA2G1B,SPD…
GO: Biological Process	GO:0030001	metal ion transport		9.626E-8	9.199E-4	7.730E-6	7.531E-5	145	1022	KCNH7,SLC24A3,TPCN1,ADORA1,ADORA2A,SLC24A4,AKT1,REM1,ANK2,ANK3,SLC6A16,AP3B1,SPTBN4,PHPT1,KCNK5,ATP1A1,ATP1A3,SLC4A4,MYLK,SLC39A11,CRACR2B,CACNA1I,CACNA1G,CACNA1A,CACNA1C,CACNA1D,CACNA1E,CACNA1S,CACNG1,SLC11A2,ATP6V0E1,NSF,CAMK2B,CASQ1,OPRD1,SLC28A1,PDE2A,PDE4D,CACNA2D2,PDGFRB,AHNAK,PLA2G1B,PLCB3,PLCG1,PLCG2,SLC25A23,CNTN1,MCOLN2,AKAP6,SLC39A3,SLC39A2,SLC31A1,SLC30A7,PLCH2,PRKCB,PRKCE,DMPK,MCUB,P…
GO: Biological Process	GO:0021954	central nervous system neuron development		9.718E-8	9.287E-4	7.739E-6	7.539E-5	27	96	SPTBN4,NRP2,NFIB,NTRK2,NR4A2,CDH11,B4GALT5,RAPGEF2,ZEB2,FEZF2,SAMD4B,EPHA4,EPHB1,EPHB2,EPHB3,FGF8,FGFR1,FGFR2,ATG7,SLIT1,SLIT3,GABRB1,DISC1,GLI2,ARHGEF28,SZT2,LMX1B
GO: Biological Process	GO:0042391	regulation of membrane potential		1.142E-7	1.091E-3	9.020E-6	8.787E-5	85	517	KCNH7,ADORA1,FZD9,ADORA2A,PARP1,AKT1,ABCD1,ANK2,ANK3,APP,SPTBN4,KCNK5,TMEM108,ATP1A1,ATP1A3,NPAS4,CACNA1I,CACNA1G,CACNA1A,CACNA1C,CACNA1D,CACNA1E,NTRK2,IGSF11,OPRD1,DGKI,PRKN,HTR3B,PDE4D,SSH1,PMAIP1,AKAP6,PRKCE,PIEZO1,CNIH3,DMPK,DPP6,DSG2,MYH14,LRRK2,KCNIP1,CACNG3,KCNU1,ATXN1,SCN4A,SCN5A,SCN8A,FGF12,FGF13,BAIAP2,PPP1R9A,SLC8A1,SHANK2,FOXP1,CACNG5,GABRB1,GABRE,NFASC,POPDC3,GOT1,CUX2,SYNE1,RAPGEF4,…
GO: Biological Process	GO:0010977	negative regulation of neuron projection development		1.172E-7	1.120E-3	9.183E-6	8.947E-5	41	186	MCF2,SEMA6A,SEMA4G,ARHGAP4,SEMA5A,PAQR3,CYTH2,SEMA5B,AATK,CSPG4,DNM3,RAPGEF2,DAB1,PTPRO,PTPRS,PTPRZ1,EFNB2,EPHA4,EPHB2,LRRK2,CDKL3,FGF13,SEMA6C,SEMA3F,SEMA4F,SEMA3C,ZNF365,SLIT1,SPOCK1,FSTL4,XYLT1,KANK1,DENND5A,CIT,NR2F1,TNR,WNT3,RTN4RL1,RBPJ,SEMA3G,LRP1
GO: Biological Process	GO:0010771	negative regulation of cell morphogenesis involved in differentiation		1.249E-7	1.193E-3	9.700E-6	9.450E-5	29	109	MCF2,SEMA6A,SEMA4G,ARHGAP4,SEMA5A,SEMA5B,BCAR1,AATK,DNM3,RAPGEF2,DAB1,PTPRO,PTPRS,EPHB2,CDKL3,FBLN1,FGF13,SEMA6C,SEMA3F,SEMA4F,SEMA3C,SLIT1,FSTL4,KANK1,CIT,TNR,CORO1C,WNT3,SEMA3G
GO: Biological Process	GO:0007423	sensory organ development		1.292E-7	1.235E-3	9.956E-6	9.700E-5	99	633	ACVRL1,MEIS1,MEIS2,MSX1,GRHL3,MYH10,PRDM1,BMP7,MYO3A,BMPR1B,NF2,NHS,SDK1,NOTCH2,CACNA1C,CACNA1S,NTRK2,ROR1,OTX1,CDH1,CDKN1C,PDE6B,PDGFRB,CLCN2,PITX3,CNGA3,COL4A1,COL8A1,COL8A2,PRRX1,COL11A1,DLL4,DUOX2,CRYBB3,CELSR1,CUX1,PROX1,IFT140,TRAF3IP1,MFRP,ZEB2,CASZ1,PTK7,PTPRM,DIO3,FAT4,NR2E3,SOBP,ECE1,GSC,GRK1,OTOP1,LEF1,EPHA4,EPHB1,EPHB2,IRX5,ESRRB,PDZD7,FBN2,SALL1,FGF8,FGFR1,FGFR3,FGFR2,ZHX2,ATF6,TENM3…
GO: Biological Process	GO:0016358	dendrite development		1.397E-7	1.335E-3	1.068E-5	1.040E-4	56	294	MAP1B,MAP6,MCF2,CSMD3,ARID1B,GIT1,APP,SCARF1,ADGRB3,BBS1,BMP7,SDK1,CACNA1A,SLC11A2,CAMK2B,NTRK2,NEURL1,CYTH2,DNM3,CTNNA2,RAPGEF2,CUX1,DAB2IP,DAB1,PTPRS,PTPRZ1,FEZF2,FBXO31,FARP1,EPHA4,EPHB1,EPHB2,EPHB3,LRRK2,CDKL3,ACSL4,FMN1,BAIAP2,ITSN1,PPP1R9A,ZNF365,TRAK1,SHANK2,FYN,DISC1,FSTL4,STRN,CUX2,SYNE1,RAPGEF4,SRCIN1,CIT,GRIP1,TIAM1,SHANK3,IL1RAP
GO: Biological Process	GO:0043269	regulation of ion transport		1.481E-7	1.415E-3	1.123E-5	1.094E-4	120	812	KCNH7,TPCN1,ADORA1,ADORA2A,AKT1,REM1,ANK2,ANK3,APP,SPTBN4,TNFSF11,KCNK5,ATP1A1,MYLK,TNFRSF11A,CRACR2B,CACNA1I,CACNA1G,CACNA1A,CACNA1C,CACNA1D,CACNA1E,CACNA1S,CACNG1,CAMK2B,CASQ1,CLIC6,SYT2,SYT7,OPRD1,SHISA9,PRKN,HTR3B,PDE4D,PIRT,CACNA2D2,PDGFRB,PDZK1,BEST3,CLCN2,AHNAK,PLA2G1B,PLCG1,PLCG2,CNTN1,AKAP6,PRKCB,PRKCE,FEV,MAP2K6,PTAFR,CNIH3,DLG2,DLG3,DMPK,PCSK9,DPP6,ACE2,EPHB2,KCNIP3,KCNIP1,CACNG3,ACSL4…
GO: Biological Process	GO:0042551	neuron maturation		1.550E-7	1.481E-3	1.166E-5	1.136E-4	20	59	ANK3,APP,SCARF1,SPTBN4,ADGRB3,NR4A2,MAP3K13,CDKN1C,B4GALT5,CSPG4,FEV,FARP2,DLG2,EPHA8,IRX5,LRRK2,NFASC,C1QL1,ANKS1A,GRIP2
GO: Biological Process	GO:0044087	regulation of cellular component biogenesis		1.665E-7	1.591E-3	1.243E-5	1.211E-4	146	1040	MAP1B,SMC1A,ACVRL1,TENM2,CRACD,PARP1,MMP14,USP36,VPS18,EPB41L5,APOD,APP,SPTBN4,MAPK15,SKAP1,MDGA1,DOCK11,MYO10,LRSAM1,ADGRB1,ADGRB2,ADGRB3,NAPA,BMP7,MYO3A,NF2,WASF1,LDLRAD4,NPHS1,NTRK2,NUMA1,CAPZB,ODF2,OPRD1,OXTR,NEURL1,PRKN,EVI5L,ENPP2,LRFN4,TBC1D22A,PIP4K2A,LMOD1,PMAIP1,UBQLN2,COL16A1,PODXL,NRG2,CHMP2B,DNM3,AUTS2,PRKCE,PRKCH,CTNNA2,RAPGEF2,CROCC,USP6NL,PROX1,DAB2IP,IFT140,ARHGAP24,TRAF3IP1,PIEZ…
GO: Biological Process	GO:0051241	negative regulation of multicellular organismal process		1.736E-7	1.659E-3	1.286E-5	1.253E-4	197	1500	MCF2,ACVRL1,ADA,MEIS1,MEIS2,AXIN2,FZD7,ADORA1,PARP1,ZNF608,FOXO4,SEMA6A,ABCD1,TRIB2,PI16,CITED1,APOD,APP,SEMA4G,MADD,SPTBN4,ARHGAP4,DACT3,ATP1A1,MDGA1,NEXMIF,ADGRB1,ADGRB2,ADGRB3,BMP7,NEUROD2,BPI,NFATC2,NFE2,NFE2L2,NFIB,LDLRAD4,NPR1,NPR2,LIMD1,SEMA5A,CTDSP1,OXTR,CD9,PRKN,PBX1,PAQR3,PRTG,PDE4D,ENPP1,CYTH2,GPR37L1,CHAD,CARD10,PCTP,SEMA5B,PITX3,TJP2,CMKLR1,DLL4,TBX21,PON1,SOSTDC1,IRX3,FOXP4,AATK,CSK…
GO: Biological Process	GO:0045165	cell fate commitment		1.777E-7	1.698E-3	1.306E-5	1.273E-4	60	326	ACVR1,DSCAML1,FZD7,PRDM1,NOTCH2,NOTCH4,RUNX2,PAX7,SPDEF,ONECUT2,PRRX1,TBX4,DLL4,TBX21,SOSTDC1,CHD5,FEV,GLIS1,PROX1,CASZ1,FEZF2,GSC,ELF5,APC2,ZFPM1,EYA2,TUNAR,SALL1,FGF1,FGF8,FGF13,FGFR1,FGFR3,FGFR2,SFRP1,OTUD5,PRICKLE2,SMARCA4,DMRTA2,PRDM14,MIAT,SOX5,NKX6-2,GDNF,GLI2,TBXT,TBX5,TBX3,TCF3,TCF7L2,FOXN4,NR2F2,CYP26B1,WNT3,WNT7B,WNT8B,WNT11,BCL11B,RBPJ,IL12RB1
GO: Biological Process	GO:0007612	learning		1.810E-7	1.730E-3	1.320E-5	1.286E-4	40	182	MEIS2,APP,PDE8B,ATP1A3,NPAS4,ADGRB3,NEUROD2,AP1S2,CACNA1C,CACNA1E,NTRK2,DGKI,PRKN,NRXN3,NRXN2,PPT1,EPHB2,ATP8A1,ATXN1,FGF13,SLC6A1,RGS14,SLC8A2,SLC8A3,SHANK2,SORCS3,FYN,JPH4,C1QL1,ABCC8,GRM4,TAFA2,TNR,HRH3,HRH1,SHANK3,TANC1,INSR,KIT,JPH3
GO: Biological Process	GO:0042127	regulation of cell population proliferation		2.011E-7	1.922E-3	1.456E-5	1.418E-4	242	1921	ACVRL1,ADA,MEIS1,MEIS2,AXIN2,MAP3K5,FZD7,ADORA1,FZD9,ADORA2A,MTA3,AKT1,FOXO4,MNT,SH3RF1,SLC25A5,CITED1,APOD,APP,MSX1,MAPK15,TNK1,ADGRB1,TNFRSF11A,NRP2,PRDM1,KSR1,BMP7,BMPR1B,NF2,NFATC2,NFE2,NFIB,KLF9,NFYA,NOTCH2,NPR1,ZBTB7C,NTRK2,SEMA5A,RUNX2,CBFA2T3,OSM,CD9,NEURL1,CD40,CD81,PAX7,PBX1,CDH1,CDH13,CDKN1C,CRLF1,PDGFRB,ENPP2,GPR37L1,RPRD1B,PITX3,PLA2G1B,PLCG1,FTO,IQGAP3,PMAIP1,CNTFR,PRRX1,MAGED1,DLL4…
GO: Biological Process	GO:0045597	positive regulation of cell differentiation		2.053E-7	1.962E-3	1.475E-5	1.437E-4	161	1177	MAP1B,MAP6,ACVR1,ACVRL1,ADA,RNF157,AXIN2,MAP3K5,PARP1,AKT1,SEMA6A,MMP14,TSHZ3,ENC1,AP3B1,CPNE5,SCARF1,TNFSF11,NCOA1,ZFHX3,ADGRB1,PRDM1,BMP7,BMPR1B,NEU2,NEUROD2,NF2,NFATC2,NFE2L2,NOTCH2,ZBTB7C,CAMK2B,NTRK2,NUMA1,SEMA5A,SYT2,RUNX2,NEURL1,PRKN,MAP3K13,ENPP2,SPDEF,CMKLR1,PLXNA1,CNTN1,AKAP6,IRX3,RGS6,ITSN2,PRKCH,KDM4A,CTNNA2,RAPGEF2,CUX1,CX3CR1,PROX1,DAB2IP,BOC,TOX,DAB1,ZEB2,TESPA1,PTK7,MAGI2,NEK5,PTP…
GO: Biological Process	GO:0030036	actin cytoskeleton organization		2.429E-7	2.322E-3	1.727E-5	1.683E-4	108	717	ACTA1,ACTG1,CRACD,ATXN3,MICAL3,SHROOM3,EPB41L5,GAS7,SPTBN4,PHPT1,GRHL3,MYH3,MYH10,ADGRB1,MYO3A,NF2,WASF1,NOTCH2,NPHS1,NRAP,CAMK2B,BRSK2,CAPZB,CASQ1,SEMA5A,FMNL3,INA,PRKN,PDGFRB,CYTH2,PARVB,SSH1,PLA2G1B,LMOD1,CNN3,ARHGEF19,BCAR1,CELSR1,AUTS2,PRKAR1A,PRKCE,CTNNA2,PROX1,MTSS1,AIF1L,ELMO1,PTK7,FARP2,PTPN1,ARHGAP25,IQSEC3,PDCD6IP,ARPC1B,MYH14,FARP1,EPB41L1,SMIM22,EPS8,OBSCN,EHD2,DLC1,FMN1,BAIAP2,CAP2,…
GO: Biological Process	GO:0072073	kidney epithelium development		2.440E-7	2.332E-3	1.727E-5	1.683E-4	36	157	TSHZ3,CITED1,MYO1E,BMP7,NOTCH2,NPHS1,PBX1,CRLF1,MAGED1,PODXL,IRX3,HS2ST1,MTSS1,MAGI2,PTPRO,FAT4,KIF26B,EFNB2,EPHA4,LGR4,SALL1,FMN1,FGF1,FGF8,FGFR1,FGFR2,SFRP1,GDNF,STAT1,GPC3,UMOD,WNT7B,WNT11,SMAD3,SMAD6,SMAD7
GO: Biological Process	GO:0031345	negative regulation of cell projection organization		2.500E-7	2.389E-3	1.756E-5	1.711E-4	46	226	MCF2,SEMA6A,SEMA4G,ARHGAP4,CAPZB,SEMA5A,PAQR3,EVI5L,CYTH2,SEMA5B,AATK,CSPG4,DNM3,RAPGEF2,ARHGAP24,DAB1,PTPRO,PTPRS,PTPRZ1,EFNB2,EPHA4,EPHB2,LRRK2,CDKL3,FGF13,SEMA6C,SEMA3F,SEMA4F,SEMA3C,ZNF365,RAB3IP,SLIT1,FYN,SPOCK1,FSTL4,XYLT1,KANK1,DENND5A,CIT,NR2F1,TNR,WNT3,RTN4RL1,RBPJ,SEMA3G,LRP1
GO: Biological Process	GO:0022604	regulation of cell morphogenesis		2.561E-7	2.447E-3	1.786E-5	1.740E-4	88	551	MAP1B,MAP6,MCF2,RNF157,SEMA6A,SHROOM3,GAS7,CPNE5,SEMA4G,ARHGAP4,MYH10,MYO10,ADGRB3,CACNA1A,LIMD1,CAMK2B,NTRK2,BRSK2,CAPZB,SEMA5A,SYT2,FMNL3,SH3D19,PRKN,MAP3K13,ENPP2,PARVB,SEMA5B,PLXNA1,BCAR1,AATK,ITSN2,DNM3,RAPGEF2,CUX1,DAB1,ZEB2,PTPRO,PTPRS,PTPRZ1,FEZF2,MEGF8,MYH14,FBXO31,ZMYM1,EPHA4,EPHB2,EPHB3,EPS8,LRRK2,CDKL3,FBLN1,DLC1,CCL3,FGF13,BAIAP2,SEMA6C,SEMA3F,SEMA4F,SEMA3C,PPP1R9A,ST6GAL1,TRAK1,SLIT…
GO: Biological Process	GO:0048762	mesenchymal cell differentiation		3.110E-7	2.972E-3	2.153E-5	2.098E-4	48	242	ACVR1,ACVRL1,AXIN2,SEMA6A,EPB41L5,SEMA4G,MSX1,DACT3,NRP2,BMP7,CYP26C1,LDLRAD4,SEMA5A,SEMA5B,DAB2IP,ZEB2,GSC,TRIM62,LEF1,ERG,FGF8,FGFR1,FGFR2,SEMA6C,SEMA3F,SEMA4F,ZNF703,SEMA3C,SFRP1,SOX10,KBTBD8,PBLD,CLASP2,GDNF,PDCD4,STAT1,TBX5,TCF7L2,AKNA,TIAM1,CORO1C,WNT11,RBPJ,CRB2,SEMA3G,HMGA2,SMAD3,SMAD7
GO: Biological Process	GO:0043954	cellular component maintenance		3.348E-7	3.199E-3	2.302E-5	2.242E-4	23	78	GIT1,ADGRB3,BSN,PLEKHA7,DLGAP1,ERC2,CTBP2,MTSS1,DCTN1,MAGI2,DLG2,DLG3,SHANK2,FYN,C1QL1,SUPT6H,RASSF8,CADM1,SHANK3,IGF1R,TANC1,INSR,KIFC3
GO: Biological Process	GO:0045944	positive regulation of transcription by RNA polymerase II		3.792E-7	3.623E-3	2.588E-5	2.521E-4	175	1315	ACVR1,ACVRL1,MEIS1,MEIS2,PARP1,AKT1,FOXO4,EBF4,AIRE,APP,MSX1,PHOX2A,TNFSF11,SKAP1,NCOA1,ZFHX3,TNKS,GRHL3,MUC1,NPAS4,BMP7,BMPR1B,NEUROD2,NFATC2,NFE2L2,NFIB,NFIC,KLF9,NFIX,NFYA,NOTCH4,NPAS1,NPAS2,ZBTB7C,NR4A2,RUNX2,OSM,OTX1,CD40,PRKN,CD81,PAX7,PBX1,PBX3,CDH13,RPRD1B,ZNF462,PITX3,PLA2G1B,SPDEF,HJV,ONECUT2,PRRX1,TBX4,EGLN1,TBX21,CREB5,AUTS2,CTBP2,FEV,MAP2K5,TCF7L1,GLIS1,PROX1,DAB2IP,ZFP42,SPAG8,ZEB2,…
GO: Biological Process	GO:0019220	regulation of phosphate metabolic process		3.998E-7	3.821E-3	2.710E-5	2.640E-4	248	1994	PIK3AP1,ACVR1,ACVRL1,ZFYVE1,ELFN2,ADCY9,MAP3K4,AXIN2,MAP3K5,FZD7,ADORA1,ADORA2A,PARP1,HEG1,AK4,AKT1,SEMA6A,ABCD1,TRIB2,SH3RF1,PIK3R3,DGKE,APP,ARAF,MADD,SPTBN4,TNFSF11,MAPK15,SLC25A12,PLPP3,RAP2C,MARCO,MYO1D,TNFRSF11A,TNFRSF10B,KSR1,BMP7,NF2,BRAT1,CDK5R2,LDLRAD4,NOTCH2,NTRK2,KSR2,NUP98,CTDSP1,CBFA2T3,MAP3K6,OPRD1,OSM,NEURL1,CD40,DGKI,PRKN,CD81,MAP3K13,CDC25C,PAQR3,CDKN1C,PDE2A,PDE4D,CRLF1,PDGFRB,E…
GO: Biological Process	GO:0051174	regulation of phosphorus metabolic process		4.165E-7	3.980E-3	2.803E-5	2.730E-4	248	1995	PIK3AP1,ACVR1,ACVRL1,ZFYVE1,ELFN2,ADCY9,MAP3K4,AXIN2,MAP3K5,FZD7,ADORA1,ADORA2A,PARP1,HEG1,AK4,AKT1,SEMA6A,ABCD1,TRIB2,SH3RF1,PIK3R3,DGKE,APP,ARAF,MADD,SPTBN4,TNFSF11,MAPK15,SLC25A12,PLPP3,RAP2C,MARCO,MYO1D,TNFRSF11A,TNFRSF10B,KSR1,BMP7,NF2,BRAT1,CDK5R2,LDLRAD4,NOTCH2,NTRK2,KSR2,NUP98,CTDSP1,CBFA2T3,MAP3K6,OPRD1,OSM,NEURL1,CD40,DGKI,PRKN,CD81,MAP3K13,CDC25C,PAQR3,CDKN1C,PDE2A,PDE4D,CRLF1,PDGFRB,E…
GO: Biological Process	GO:0000165	MAPK cascade		4.384E-7	4.189E-3	2.930E-5	2.854E-4	145	1048	PIK3AP1,MBP,MAP3K4,MAP3K5,FZD7,ADORA1,AKT1,SEMA6A,TRIB2,SH3RF1,APP,ARAF,MADD,SPTBN4,TNFSF11,MAPK15,MARCO,TNFRSF11A,KSR1,BMP7,NF2,NOTCH2,NPHS1,NTRK2,KSR2,MAP3K6,OSM,OXTR,CD40,PRKN,CD81,MAP3K13,PAQR3,PDGFRB,GPR37L1,DSTYK,PLA2G1B,IQGAP3,NECAB2,MAGED1,NRG2,CSK,CSPG4,PRKCE,MAPK4,RAPGEF2,MAP2K5,MAP2K6,DAB2IP,RASSF2,PSMA6,PSMB6,PSMB7,ZEB2,PTPN1,PTPRR,ULK4,DLG2,DLG3,RBX1,INHBE,HBEGF,DUSP7,DUSP8,DUSP9,RAN…
GO: Biological Process	GO:0060429	epithelium development		4.461E-7	4.263E-3	2.960E-5	2.884E-4	193	1483	ACVR1,ACVRL1,AXIN2,FZD7,HEG1,AKT1,MMP14,TSHZ3,SHROOM3,PLEKHA4,EPB41L5,AIRE,CITED1,MSX1,TNFSF11,GRHL3,RAP2C,MYO1E,PRDM1,BMP7,MYO3A,NF2,NFIB,NOTCH2,NOTCH4,NPHS1,ROR1,NUMA1,BRSK2,SEMA5A,RIPK4,MAP7,CD151,PAX7,PBX1,DNAAF1,CDH1,CDKN1C,PDE2A,PDE4D,CRLF1,NUP210L,PTER,SERPINB13,CCDC78,PITX3,PKP1,TJP2,SPDEF,IQGAP3,PLXNA1,CNN3,COL4A1,ONECUT2,ARHGEF19,TBX4,MAGED1,DLL4,PODXL,SOSTDC1,IRX3,NCOR2,FOXP4,CELSR1,HS…
GO: Biological Process	GO:0030517	negative regulation of axon extension		4.561E-7	4.358E-3	3.006E-5	2.928E-4	17	47	SEMA6A,SEMA4G,ARHGAP4,SEMA5A,SEMA5B,AATK,PTPRS,CDKL3,SEMA6C,SEMA3F,SEMA4F,SEMA3C,SLIT1,FSTL4,TNR,WNT3,SEMA3G
GO: Biological Process	GO:0060070	canonical Wnt signaling pathway		4.976E-7	4.755E-3	3.257E-5	3.173E-4	62	351	AXIN2,FZD7,FZD9,PLEKHA4,PLPP3,DACT3,TNKS,LIMD1,NR4A2,SEMA5A,PRKN,CDH1,SOSTDC1,ADGRA2,FAM53B,TCF7L1,DAB2IP,PSMA6,PSMB6,PSMB7,PTK7,SOX7,PTPRO,RBX1,EDA,RNF220,LGR6,LEF1,APC2,LRRK2,LGR4,ZNRF3,FGF8,FGFR3,GPC5,FGFR2,BICC1,ZNF703,SFRP1,ANKRD6,SOX10,DISC1,KANK1,SULF2,GPC3,RBMS3,TBXT,TCF7L2,RAPGEF1,THRA,NRARP,UBE2B,WNT3,WNT7B,WNT8B,WNT11,PORCN,NKD2,RBPJ,WNK2,LRP5,SMAD3
GO: Biological Process	GO:0098660	inorganic ion transmembrane transport		5.582E-7	5.334E-3	3.621E-5	3.528E-4	149	1088	KCNH7,SLC24A3,TPCN1,SLC24A4,AK4,ABCD1,REM1,ANK2,ANK3,SLC6A16,PHPT1,KCNK5,ATP1A1,ATP1A3,SLC4A4,AFG1L,SLC39A11,NDUFB5,CACNA1I,CACNA1G,CACNA1A,CACNA1C,CACNA1D,CACNA1E,CACNA1S,CACNG1,SLC11A2,ATP6V0E1,CASQ1,CLIC6,SLC28A1,PDE2A,PDE4D,CACNA2D2,BEST3,CLCN2,CLCN6,AHNAK,PLCB3,PLCG1,PLCG2,SLC25A23,CNGA3,MCOLN2,AKAP6,SLC39A3,SLC39A2,SLC31A1,PLCH2,PRKCE,PTAFR,MCUB,PCSK9,DPP6,ANO10,SGK2,OTOP1,SLC45A2,KCNIP3,KC…
GO: Biological Process	GO:0098609	cell-cell adhesion		5.608E-7	5.359E-3	3.621E-5	3.528E-4	129	911	MBP,MCAM,ACTG1,ACVR1,ADA,TENM2,DSCAML1,ADORA2A,ZNF608,AKT1,ANK3,EPB41L5,AP3B1,TNFSF11,PLPP3,SKAP1,ASS1,MDGA1,CADM3,MYO10,NEXMIF,BMP7,NF2,PLEKHA7,SDK1,IGSF11,CD9,CD81,CDH1,PCDH9,CDH11,CDH13,PRTG,LRFN4,NRXN3,NRXN2,GRAP2,PKP1,CNN3,COL8A2,COL13A1,PODXL,TBX21,CELSR1,CSK,PRKAR1A,CTNNA2,MAP2K5,CX3CR1,BOC,PIEZO1,DAB1,PTAFR,JAML,TESPA1,MAGI2,PTPRM,PTPRR,PTPRS,NECTIN2,DLG2,DLG3,DPP4,FAT4,DSG2,KIF26B,DTX1,E…
GO: Biological Process	GO:0003002	regionalization		7.220E-7	6.899E-3	4.630E-5	4.511E-4	66	386	ACVR1,DSCAML1,MAP3K4,AXIN2,EPB41L5,MSX1,NRP2,BMPR1B,CYP26C1,NOTCH2,OTX1,PAX7,PBX1,DNAAF1,PBX3,DLL4,DPCD,SOSTDC1,IRX3,CELSR1,TCF7L1,IFT140,TRAF3IP1,IFT172,ZEB2,FEZF2,RFX4,GSC,MEGF8,ATP6AP2,LEF1,FGF1,FGF8,FGFR1,FGFR2,SEMA3F,SEMA3C,SFRP1,SCMH1,DMRTA2,NKX6-2,GDNF,GPC3,GLI2,KDM2B,TBXT,TBX3,FOXN4,NR2F1,NR2F2,POFUT1,TTN,ALX4,NRARP,HOXA9,CYP26B1,WNT3,WNT7B,WNT8B,ZIC3,RBPJ,CRB2,LMX1B,LRP5,SMAD3,SMAD6
GO: Biological Process	GO:0048167	regulation of synaptic plasticity		7.311E-7	6.987E-3	4.658E-5	4.538E-4	45	227	MAP1B,ADORA1,ADORA2A,SORCS2,TSHZ3,PPFIA3,APP,NPAS4,ADGRB1,NEUROD2,CAMK2B,NTRK2,IGSF11,SYT7,SHISA9,NEURL1,DGKI,SSH1,RAPGEF2,CX3CR1,EPHA4,EPHB2,BAIAP2,PPP1R9A,RGS14,SLC8A2,SLC8A3,SHANK2,SORCS3,JPH4,IQSEC2,NCDN,GRID2,GRIN2C,TNR,MGLL,HRAS,HRH1,YWHAG,SHANK3,ITPR3,GRID2IP,KCNB1,KIT,JPH3
GO: Biological Process	GO:0009968	negative regulation of signal transduction		7.615E-7	7.277E-3	4.819E-5	4.695E-4	195	1513	PIK3AP1,ACVR1,ADA,ADCY9,AXIN2,ADORA1,FZD9,HEG1,AKT1,SEMA6A,MMP14,MNT,SH3RF1,GIT1,SLC25A5,CITED1,APOD,MADD,PHPT1,DACT3,MUC1,MARCO,TNK1,TNFRSF10B,PRDM1,BMP7,NF2,NFE2L2,CYP26C1,LDLRAD4,NOTCH4,LIMD1,CAMK2B,NR4A2,RUNX2,OPRD1,USP10,NEURL1,PRKN,MOSMO,CDH1,PAQR3,PDE2A,PDE4D,ENPP1,GPR37L1,CHRM3,SGMS1,HJV,ONECUT2,NECAB2,UBQLN2,DLL4,RRM2B,EGLN1,SOSTDC1,CHST11,ADGRA2,NCOR2,PPP2R5C,RGS6,CSK,PRKCB,MAP2K5,CX3CR…
GO: Biological Process	GO:0007010	cytoskeleton organization		8.065E-7	7.707E-3	5.070E-5	4.940E-4	211	1663	MAP1B,MAP6,SMC1A,ACTA1,ACTG1,CRACD,ATXN3,AKT1,MICAL3,SEMA6A,SHROOM3,ANK1,ANK2,ANK3,FIGNL2,EPB41L5,GAS7,NCKAP5L,CDC14A,SPTBN4,ARHGAP4,ARL3,MAPK15,PHPT1,SKAP1,TNKS,GRHL3,MYH3,MYH10,ADGRB1,BBS1,MYO3A,NF2,ZPR1,WASF1,UBXN10,NOTCH2,NPHS1,NRAP,LIMD1,CAMK2B,NUMA1,BRSK2,CAPZB,CASQ1,SEMA5A,MAP7,ODF2,TTLL8,FMNL3,INA,SH3D19,NEURL1,PRKN,DNAAF1,EVI5L,PDGFRB,CYTH2,RCC1,PARVB,CFAP54,SSH1,TBC1D22A,SUN2,CCDC78,PKP…
GO: Biological Process	GO:0023014	signal transduction by protein phosphorylation		8.516E-7	8.138E-3	5.245E-5	5.110E-4	145	1060	PIK3AP1,MBP,MAP3K4,MAP3K5,FZD7,ADORA1,AKT1,SEMA6A,TRIB2,SH3RF1,APP,ARAF,MADD,SPTBN4,TNFSF11,MAPK15,MARCO,TNFRSF11A,KSR1,BMP7,NF2,NOTCH2,NPHS1,NTRK2,KSR2,MAP3K6,OSM,OXTR,CD40,PRKN,CD81,MAP3K13,PAQR3,PDGFRB,GPR37L1,DSTYK,PLA2G1B,IQGAP3,NECAB2,MAGED1,NRG2,CSK,CSPG4,PRKCE,MAPK4,RAPGEF2,MAP2K5,MAP2K6,DAB2IP,RASSF2,PSMA6,PSMB6,PSMB7,ZEB2,PTPN1,PTPRR,ULK4,DLG2,DLG3,RBX1,INHBE,HBEGF,DUSP7,DUSP8,DUSP9,RAN…
GO: Biological Process	GO:0060341	regulation of cellular localization		8.516E-7	8.138E-3	5.245E-5	5.110E-4	145	1060	ABHD17A,ABCA2,MAP1B,BTBD9,FZD9,ADORA2A,PARP1,SCAMP5,AKT1,MMP14,USP36,VPS18,ANK2,ANK3,GIT1,APBA1,APBA2,APOD,MAPK15,PHPT1,PDE8B,LRRC15,NAPA,NF2,ZPR1,BSN,NMT1,CACNA1A,CACNA1C,CACNA1D,CACNA1E,CAMK2B,NTRK2,NUMA1,BRSK2,CASQ1,SYT2,SYT7,OXCT1,DGKI,PRKN,CD81,CDH1,CDK16,PDE1C,PDE4D,PDZK1,CARD10,NRXN3,SSH1,PLA2G1B,PLCG1,PMAIP1,AKAP6,NECAB2,MAGED1,SEPTIN5,CELSR1,CSK,NUS1,DNM3,PRKCB,PRKCE,PRKCH,FEV,CROCC,GIT2…
GO: Biological Process	GO:0050771	negative regulation of axonogenesis		8.520E-7	8.142E-3	5.245E-5	5.110E-4	22	76	MCF2,SEMA6A,SEMA4G,ARHGAP4,SEMA5A,SEMA5B,AATK,DAB1,PTPRO,PTPRS,EPHB2,CDKL3,FGF13,SEMA6C,SEMA3F,SEMA4F,SEMA3C,SLIT1,FSTL4,TNR,WNT3,SEMA3G
GO: Biological Process	GO:0050905	neuromuscular process		8.563E-7	8.183E-3	5.245E-5	5.110E-4	32	138	ADORA2A,APP,PDE8B,MYH10,AP1S2,NPAS1,CACNA1A,CAMK2B,PRKN,PENK,IGDCC3,RBFOX1,CTNNA2,DCTN1,FABP7,ATXN2,SCN8A,FGF12,SLC1A3,JPH4,NKX6-2,NPAS3,CDH23,CAMTA1,GRID2,GRIN2C,TNR,SHANK3,IGHMBP2,KCNH1,KCNMA1,JPH3
GO: Biological Process	GO:0044057	regulation of system process		8.619E-7	8.236E-3	5.246E-5	5.111E-4	107	727	ADA,ADORA1,ADORA2A,PARP1,AKT1,TSHZ3,ANK2,PI16,APP,MADD,SPTBN4,SLC25A12,TMEM108,ATP1A1,ATP1A3,MYL4,CACNA1G,MYRF,NPHS1,CACNA1C,CACNA1D,CACNA1E,CACNA1S,NPR1,NPR2,CACNG1,CAMK2B,CASQ1,IGSF11,OPRD1,SHISA9,OXTR,PRKN,PBX3,DLGAP2,PDE4D,CACNA2D2,CHRM3,SSH1,FTO,AKAP6,GTF2IRD1,RAB11FIP3,MTG2,PTAFR,PTPRO,DMPK,DSG2,HBEGF,ECE1,ACE2,IRX5,LRRK2,KCNIP3,KCNIP1,CACNG3,SCN4A,SCN5A,CCL3,FGF12,FGF13,FGFR1,BAIAP2,RAB11F…
GO: Biological Process	GO:0055123	digestive system development		9.971E-7	9.528E-3	5.964E-5	5.810E-4	35	159	ADA,EPB41L5,ASS1,PRDM1,OXTR,DNAAF1,CDH1,CDKN1C,SPDEF,FOXP4,IFT172,DAB1,FAT4,MEGF8,CELA1,EPHB3,STX2,LGR4,SALL1,FGFR3,FGFR2,SFRP1,SOX10,GLI2,TCF7L2,ALX4,WNT11,ZIC3,IGF1R,INSR,C1GALT1,ITGB4,KIT,YIPF6,SMAD3
GO: Biological Process	GO:0099643	signal release from synapse		9.986E-7	9.542E-3	5.964E-5	5.810E-4	43	215	ADORA2A,VPS18,GIT1,PPFIA4,APBA1,APBA2,PPFIA3,APP,NAPA,CACNA1A,CACNA1D,NTRK2,SYT2,SYT7,DGKI,PRKN,NRXN3,NRXN2,OTOF,SEPTIN5,CELSR1,PPT1,ERC2,PRKCB,PRKCE,CTBP2,SNPH,GIT2,PTPRN2,RHOT1,STX2,LRRK2,PPP1R9A,RPH3A,SLC6A9,SYN2,GRM4,PIP5K1C,HRH3,HTR2A,HTR2C,ICA1,KCNH1
GO: Biological Process	GO:0007269	neurotransmitter secretion		9.986E-7	9.542E-3	5.964E-5	5.810E-4	43	215	ADORA2A,VPS18,GIT1,PPFIA4,APBA1,APBA2,PPFIA3,APP,NAPA,CACNA1A,CACNA1D,NTRK2,SYT2,SYT7,DGKI,PRKN,NRXN3,NRXN2,OTOF,SEPTIN5,CELSR1,PPT1,ERC2,PRKCB,PRKCE,CTBP2,SNPH,GIT2,PTPRN2,RHOT1,STX2,LRRK2,PPP1R9A,RPH3A,SLC6A9,SYN2,GRM4,PIP5K1C,HRH3,HTR2A,HTR2C,ICA1,KCNH1
GO: Biological Process	GO:0098662	inorganic cation transmembrane transport		1.081E-6	1.033E-2	6.414E-5	6.249E-4	137	993	KCNH7,SLC24A3,TPCN1,SLC24A4,AK4,ABCD1,REM1,ANK2,ANK3,SLC6A16,PHPT1,KCNK5,ATP1A1,ATP1A3,SLC4A4,AFG1L,SLC39A11,NDUFB5,CACNA1I,CACNA1G,CACNA1A,CACNA1C,CACNA1D,CACNA1E,CACNA1S,CACNG1,SLC11A2,ATP6V0E1,CASQ1,SLC28A1,PDE2A,PDE4D,CACNA2D2,AHNAK,PLCB3,PLCG1,PLCG2,SLC25A23,CNGA3,MCOLN2,AKAP6,SLC39A3,SLC39A2,SLC31A1,PLCH2,PRKCE,MCUB,PCSK9,DPP6,SGK2,OTOP1,SLC45A2,KCNIP3,KCNIP1,CACNG3,KCNU1,TRPM3,SCN4A,SCN5A,…
GO: Biological Process	GO:0010769	regulation of cell morphogenesis involved in differentiation		1.210E-6	1.157E-2	7.140E-5	6.955E-4	62	360	MAP1B,MAP6,MCF2,SEMA6A,SEMA4G,ARHGAP4,ADGRB3,CACNA1A,CAMK2B,NTRK2,BRSK2,SEMA5A,MAP3K13,ENPP2,SEMA5B,PLXNA1,BCAR1,AATK,DNM3,RAPGEF2,CUX1,DAB1,ZEB2,PTPRO,PTPRS,PTPRZ1,FEZF2,MEGF8,FBXO31,EPHA4,EPHB2,EPHB3,LRRK2,CDKL3,FBLN1,FGF13,BAIAP2,SEMA6C,SEMA3F,SEMA4F,SEMA3C,PPP1R9A,ST6GAL1,TRAK1,SLIT1,DISC1,FSTL4,CLASP2,KANK1,CUX2,SYNE1,SRCIN1,CIT,TIAM1,TTL,TNR,CORO1C,MGLL,WNT3,SHANK3,SEMA3G,LRP1
GO: Biological Process	GO:0061337	cardiac conduction		1.266E-6	1.210E-2	7.421E-5	7.230E-4	33	147	ANK2,SPTBN4,ATP1A1,ATP1A3,CACNA1G,CACNA1C,CACNA1D,CACNA1S,NPR1,NPR2,CACNG1,CASQ1,PDE4D,CACNA2D2,DMPK,DSG2,ACE2,KCNIP3,KCNIP1,CACNG3,SCN5A,SLC8A2,SLC8A1,SLC8A3,CORIN,CACNG5,ITPR1,ITPR2,ITPR3,KCNA5,KCND3,KCNH2,KCNQ1
GO: Biological Process	GO:0051146	striated muscle cell differentiation		1.444E-6	1.380E-2	8.415E-5	8.198E-4	61	354	ACADM,ACTA1,ACTG1,ACVR1,FZD7,AKT1,MMP14,PI16,MSX1,MYH3,MYH10,ADGRB1,ADGRB3,NEU2,NFATC2,NPHS1,CACNA1S,NRAP,CAPZB,CASQ1,CD9,CD81,HACD1,CACNA2D2,PDGFRB,LMOD1,AKAP6,PRKAR1A,PROX1,PTGFRN,NEK5,DMPK,EFNB2,SPEG,OBSCN,RXRB,EHD2,FLT3LG,ATG7,FHOD3,SLC8A1,WFIKKN1,ANKRD1,FOXP1,SIK1,TBXT,POPDC3,MYO18B,TBX5,TBX3,TMEM119,THRA,AKAP13,TTN,SMYD3,CYP26B1,NIBAN2,RBPJ,TANC1,KCNH1,ADAM12
GO: Biological Process	GO:0001501	skeletal system development		1.472E-6	1.407E-2	8.525E-5	8.306E-4	89	582	MATN3,ACVRL1,DSCAML1,MEIS1,AXIN2,MMP14,UNCX,MSX1,TNFSF11,BBS1,BGN,BMP7,BMPR1B,NFIB,VWA2,NOTCH2,CACNA1S,NPR2,RUNX2,PAX7,PBX1,CDH11,CDKN1C,PDGFRB,CHAD,PIP4K2A,TJP2,CMKLR1,COL9A1,PRRX1,COL11A1,TBX4,COL13A1,SLC39A3,CHST11,IFT140,RASSF2,IFT172,FAT4,GSC,MEGF8,LINC-PINT,IRX5,EXT1,ZFPM1,ZBTB7A,FBN2,MBTPS2,FMN1,FGF8,FGFR1,FGFR3,FGFR2,SFRP1,FBXW4,TRIM45,WFIKKN1,FOXP1,SOX5,SPARC,WWOX,XYLT1,SULF2,GLG1,GLI2,N…
GO: Biological Process	GO:0098727	maintenance of cell number		1.602E-6	1.530E-2	9.219E-5	8.982E-4	39	190	SMC1A,FZD7,BMP7,NFYA,NOTCH2,PBX1,PRRX1,POLR2F,TCF7L1,PROX1,LIN28A,ELF5,ESRRB,MECOM,FANCC,SALL1,FGFR1,FGFR3,SFRP1,ZHX2,TET1,SMARCA4,FOXP1,PRDM16,PRDM14,STAG2,MIAT,KDM2B,TBX3,TCF7L2,TEAD1,ZIC3,RBPJ,LBH,KIT,SALL4,JMJD1C,HMGA2,LRP5
GO: Biological Process	GO:0055085	transmembrane transport		1.619E-6	1.547E-2	9.249E-5	9.010E-4	227	1830	ABCA2,KCNH7,ABCA4,ACACB,UPK3B,SLC24A3,TPCN1,SLC24A4,SFXN2,AK4,AKT1,ABCD1,UNC79,REM1,ANK2,ANK3,OSTM1,SLC25A5,SLC6A16,APP,SLC25A12,PHPT1,KCNK5,ATP1A1,ATP1A3,SLC4A4,AFG1L,ABCC3,SLC39A11,NDUFB5,NFE2L2,CACNA1I,CACNA1G,CACNA1A,CACNA1C,CACNA1D,CACNA1E,CACNA1S,CACNG1,SLC11A2,ATP6V0E1,CASQ1,CLIC6,SLC7A7,SHISA9,SLC28A1,HTR3B,PDE2A,PDE4D,PIRT,CACNA2D2,ENPP1,PDZK1,PEX6,BEST3,NRXN3,CLCN2,CLCN6,NRXN2,AHNAK,PLA…
GO: Biological Process	GO:0033674	positive regulation of kinase activity		1.626E-6	1.554E-2	9.249E-5	9.010E-4	97	651	ADCY9,MAP3K4,AXIN2,MAP3K5,ADORA1,ADORA2A,AKT1,DGKE,ARAF,MADD,TNFSF11,RAP2C,TNFRSF11A,TNFRSF10B,CDK5R2,NTRK2,MAP3K6,NEURL1,CD40,DGKI,CD81,MAP3K13,PDGFRB,CARD10,PFKFB1,DSTYK,PLA2G1B,IQGAP3,CARD14,AKAP6,MAGED1,CSK,CSPG4,PRKAG1,PRKAR1A,RAPGEF2,MAP2K5,MAP2K6,PROX1,DAB2IP,RASSF2,DAB1,DGKG,ZEB2,PTPN1,DLG3,TNFSF15,DUSP7,DUSP9,EEF1A2,EPHA4,EPHA8,EPHB2,LRRK2,TAOK3,NOD1,FGF1,FGF13,FGFR1,FGFR3,TAB1,PRKAG2,PI…
GO: Biological Process	GO:0035418	protein localization to synapse		1.644E-6	1.571E-2	9.294E-5	9.054E-4	26	103	GIT1,BSN,NPHS1,LGI1,DLGAP1,NRXN2,CNIH3,MAGI2,DLG2,DLG3,GPC6,CACNG3,GPC4,BAIAP2,CLSTN1,CACNG5,IQSEC2,MAPK8IP3,RAPGEF4,GRIN2C,GRIP1,GRIP2,HRAS,ANKS1B,KIF5A,KIF5C
GO: Biological Process	GO:0050919	negative chemotaxis		1.716E-6	1.640E-2	9.647E-5	9.398E-4	17	51	SEMA6A,SEMA4G,NRP2,SEMA5A,SEMA5B,LGR6,LGR4,SEMA6C,SEMA3F,SEMA4F,SEMA3C,SLIT1,SLIT3,FLRT3,RTN4RL1,IGFALS,SEMA3G
GO: Biological Process	GO:0048514	blood vessel morphogenesis		1.729E-6	1.652E-2	9.663E-5	9.414E-4	109	755	MCAM,ACVR1,ACVRL1,MEIS1,HEG1,AKT1,FOXO4,SEMA6A,MMP14,PIK3R3,CITED1,APOD,MYLK,MYO1E,ADGRB1,ADGRB2,ADGRB3,NRP2,PRDM1,NFE2L2,NOTCH2,NOTCH4,NPR1,NTRK2,SEMA5A,FMNL3,CD40,CDH13,PDGFRB,ENPP2,CARD10,ARHGAP22,NRXN3,HS6ST1,PLCG1,COL4A1,COL8A1,COL8A2,PRRX1,TBX4,COL15A1,DLL4,EGLN1,ADGRA2,NUS1,CSPG4,PRKCB,RAPGEF2,MAP2K5,CX3CR1,PROX1,DAB2IP,ARHGAP24,RASIP1,PTPRM,HBEGF,EFNB2,KCTD10,CELA1,LEF1,EPHB1,EPHB2,EPHB3,…
GO: Biological Process	GO:0007611	learning or memory		1.742E-6	1.665E-2	9.680E-5	9.430E-4	56	317	BTBD9,MEIS2,FZD9,APP,PDE8B,ATP1A3,NPAS4,ADGRB3,NEUROD2,AP1S2,CACNA1C,CACNA1E,SLC11A2,NTRK2,OXTR,DGKI,PRKN,NRXN3,NRXN2,PPT1,CX3CR1,KMT2B,PTPRZ1,RCAN2,EPHB2,ATP8A1,ATXN1,FGF13,SLC6A1,RGS14,SLC8A2,SLC8A3,SHANK2,SORCS3,FYN,JPH4,C1QL1,ABCC8,CUX2,GRM4,TAFA2,THRA,TNR,HRH3,HRH1,HTR2A,SHANK3,TANC1,INSR,ITGA5,ITPR3,KCNAB1,KIT,LAMB1,LMX1B,JPH3
GO: Biological Process	GO:0007389	pattern specification process		1.765E-6	1.687E-2	9.749E-5	9.498E-4	78	493	ACVR1,ACVRL1,DSCAML1,MAP3K4,AXIN2,SHROOM3,UNCX,EPB41L5,CITED1,MSX1,GRHL3,NRP2,BMP7,BMPR1B,CYP26C1,NOTCH2,OTX1,PAX7,PBX1,DNAAF1,PBX3,DLL4,DPCD,SOSTDC1,IRX3,CELSR1,TCF7L1,IFT140,TRAF3IP1,IFT172,ZEB2,FEZF2,RFX4,GSC,MEGF8,ATP6AP2,LEF1,APC2,FGF1,FGF8,FGFR1,FGFR2,BICC1,SEMA3F,SEMA3C,SFRP1,SIM2,DNAI1,SCMH1,DMRTA2,NKX6-2,GDNF,GPC3,GLI2,KDM2B,TBXT,TBX5,TBX3,FOXN4,NR2F1,NR2F2,DNAI2,POFUT1,TTN,ALX4,NRARP,HO…
GO: Biological Process	GO:0072001	renal system development		1.830E-6	1.749E-2	1.002E-4	9.765E-4	58	333	TSHZ3,CITED1,ARL3,ASS1,MYO1E,BMP7,NOTCH2,NPHS1,PBX1,CDKN1C,CRLF1,PDGFRB,COL4A1,MAGED1,PODXL,RRM2B,IRX3,HS2ST1,CUX1,PROX1,IFT140,TRAF3IP1,MTSS1,MAGI2,PTPRO,PCSK9,FAT4,KIF26B,LIN28A,EFNB2,EPHA4,LRRK2,LGR4,MECOM,SALL1,FMN1,FGF1,FGF8,FGFR1,FGFR2,FRAS1,SFRP1,GDNF,STAT1,KIRREL3,SULF2,GPC3,GLI2,UMOD,CYP26B1,WNT7B,WNT11,C1GALT1,ITGB4,NUP107,SMAD3,SMAD6,SMAD7
GO: Biological Process	GO:0001764	neuron migration		1.836E-6	1.754E-2	1.002E-4	9.765E-4	39	191	MAP1B,SEMA6A,SH3RF1,APBB2,MDGA1,MYH10,NEXMIF,BBS1,NRP2,CDK5R2,CAMK2B,NTRK2,NR4A2,CDH1,CELSR1,AUTS2,CTNNA2,RAPGEF2,DAB2IP,SCRT1,DAB1,PTPRZ1,ULK4,FEZF2,FBXO31,KIAA0319L,FGF13,FGFR1,FYN,ZNF609,SPOCK1,DISC1,MAPK8IP3,KIRREL3,ADGRL3,NR2F1,NR2F2,NAV1,LMX1B
GO: Biological Process	GO:0098657	import into cell		1.898E-6	1.813E-2	1.030E-4	1.004E-3	129	932	ACTG1,BTBD9,LDLRAD3,LRP1B,SCAMP5,AKT1,ARHGAP21,ANK2,APP,SCARF1,MAPK15,KCNK5,TMEM108,ATP1A1,ATP1A3,MARCO,MYO1E,LRSAM1,ADGRB1,WASF1,SLC11A2,NSF,CXCL16,SYT2,SYT7,CD9,PRKN,CD81,CD151,CDH13,ENPP1,ENPP2,CYTH2,LIPG,CLTA,PLCG2,CNGA3,NECAB2,UBQLN2,SLC31A1,CD207,PPT1,CSK,ITSN2,DNM3,FEV,SNPH,ELMO1,MAGI2,PTPN1,SSC5D,ARHGAP25,PCSK9,ATP9A,ECE1,EFNB2,TNK2,KIAA0319L,LRRK2,EHD2,CACNG3,TBC1D16,FCER1G,ATXN2,STAB2,I…
GO: Biological Process	GO:0048332	mesoderm morphogenesis		2.011E-6	1.922E-2	1.081E-4	1.053E-3	41	206	MBP,ACVR1,FZD7,MMP14,MMP15,EPB41L5,PLPP3,BMP7,NF2,COL8A1,COL11A1,CELSR1,PRKAR1A,MAP2K5,TCF7L1,SOX7,GSC,MEGF8,ELF5,LEF1,EXT1,EYA2,FGF8,FGFR1,FGFR2,SFRP1,CLASP2,GPC3,TBXT,TBX3,TCF3,WNT3,WNT8B,WNT11,CRB2,ITGA5,ITGB4,LAMB1,HMGA2,LRP5,SMAD3
GO: Biological Process	GO:0040012	regulation of locomotion		2.013E-6	1.923E-2	1.081E-4	1.053E-3	159	1203	MCAM,ACVR1,ACVRL1,ADA,ADORA1,ADORA2A,MTUS1,AKT1,FOXO4,SEMA6A,MMP14,PIK3R3,EPB41L5,AIRE,APOD,APP,SEMA4G,ARHGAP4,MAPK15,PHPT1,PLPP3,RAP2C,LRRC15,MYLK,NEXMIF,ADGRB1,BBS1,NRP2,BMP7,NF2,NFE2L2,LDLRAD4,CAMK2B,SEMA5A,CXCL16,CD9,CD40,CD81,CD151,PAX7,CDH1,CDH13,PDGFRB,ENPP2,CARD10,SSH1,SEMA5B,SUN2,PLCG1,CMKLR1,PLXNA1,ONECUT2,DLL4,PODXL,MMP28,NRG2,DUOX2,BCAR1,ADGRA2,CHMP2B,NUS1,PRKCE,CTNNA2,RAPGEF2,MAP2K5,…
GO: Biological Process	GO:0042325	regulation of phosphorylation		2.205E-6	2.108E-2	1.177E-4	1.147E-3	221	1781	PIK3AP1,ACVR1,ACVRL1,ADCY9,MAP3K4,AXIN2,MAP3K5,FZD7,ADORA1,ADORA2A,HEG1,AK4,AKT1,SEMA6A,ABCD1,TRIB2,SH3RF1,PIK3R3,DGKE,APP,ARAF,MADD,SPTBN4,TNFSF11,MAPK15,PLPP3,RAP2C,MARCO,TNFRSF11A,TNFRSF10B,KSR1,BMP7,NF2,BRAT1,CDK5R2,LDLRAD4,NOTCH2,NTRK2,KSR2,NUP98,CTDSP1,CBFA2T3,MAP3K6,OPRD1,OSM,NEURL1,CD40,DGKI,PRKN,CD81,MAP3K13,CDC25C,PAQR3,CDKN1C,PDE2A,PDE4D,CRLF1,PDGFRB,ENPP1,ENPP2,GPR37L1,CARD10,PFKFB1,D…
GO: Biological Process	GO:0007254	JNK cascade		2.378E-6	2.273E-2	1.263E-4	1.230E-3	46	244	MAP3K4,MAP3K5,FZD7,AKT1,SH3RF1,APP,TNFSF11,TNFRSF11A,NPHS1,MAP3K6,PRKN,MAP3K13,DAB2IP,RASSF2,ZEB2,PTPN1,ULK4,DUSP9,IRAK4,EPHA4,EPHB1,MECOM,TAOK3,NOD1,FGF12,TAB1,SFRP1,ANKRD6,NOX1,GAB1,MAP3K20,PDCD4,MAPK8IP3,FGD4,SYK,RAPGEF1,TIAM1,MAP4K1,TNXB,HMGB1,HRAS,WNT7B,IGF1R,PINK1,LMNB1,LTBR
GO: Biological Process	GO:0019827	stem cell population maintenance		2.441E-6	2.333E-2	1.282E-4	1.249E-3	38	186	SMC1A,FZD7,BMP7,NFYA,NOTCH2,PBX1,PRRX1,POLR2F,TCF7L1,PROX1,LIN28A,ELF5,ESRRB,FANCC,SALL1,FGFR1,FGFR3,SFRP1,ZHX2,TET1,SMARCA4,FOXP1,PRDM16,PRDM14,STAG2,MIAT,KDM2B,TBX3,TCF7L2,TEAD1,ZIC3,RBPJ,LBH,KIT,SALL4,JMJD1C,HMGA2,LRP5
GO: Biological Process	GO:0030534	adult behavior		2.441E-6	2.333E-2	1.282E-4	1.249E-3	38	186	BTBD9,PARP1,UNC79,APP,ARCN1,SPTBN4,ATP1A3,BBS1,SDK1,CACNA1A,CACNA1C,NR4A2,OPRD1,PRKN,PBX3,OTOG,NRXN3,NRXN2,SEPTIN5,PPT1,DAB1,EPHA4,EPS8,ATXN1,SCN8A,FGF12,ATG7,SLC1A2,SHANK2,CDH23,GDNF,SEZ6L,PARK7,TSHR,HTR2A,HTR2C,SHANK3,KCNMA1
GO: Biological Process	GO:0001701	in utero embryonic development		2.698E-6	2.578E-2	1.409E-4	1.372E-3	80	515	ACVR1,ACVRL1,ADA,LRP1B,ADCY9,HEG1,AKT1,TSHZ3,APBA1,APBA2,EPB41L5,CITED1,MSX1,NCOA1,MYH10,MYO1E,PRDM1,BMP7,NFE2,ZPR1,NMT1,NOTCH2,CDH1,CDKN1C,PDGFRB,PDZK1,KPNA7,HS6ST1,PLCG1,SLC39A3,ADAMTS3,EGLN1,CHST11,HINFP,NCOR2,SH3PXD2A,TANC2,ZFP42,MTSS1,SEC24D,PTPRR,ARNT2,RAD51B,HBEGF,LEF1,SPEG,ESRRB,MECOM,MEG3,RXRB,FGFR1,TAB1,FGFR2,SLC8A1,TET1,PRICKLE2,SMARCA4,FOXP1,PRDM14,GAB1,SOX5,SOX10,MAPK8IP3,SUPT6H,GLI2…
GO: Biological Process	GO:0008344	adult locomotory behavior		2.936E-6	2.806E-2	1.525E-4	1.486E-3	26	106	BTBD9,APP,ARCN1,SPTBN4,ATP1A3,CACNA1A,CACNA1C,NR4A2,OPRD1,PRKN,PBX3,OTOG,PPT1,DAB1,EPHA4,EPS8,ATXN1,SCN8A,FGF12,ATG7,CDH23,GDNF,SEZ6L,PARK7,TSHR,KCNMA1
GO: Biological Process	GO:0003279	cardiac septum development		3.223E-6	3.080E-2	1.665E-4	1.622E-3	29	126	ACVR1,HEG1,ANK2,MYH10,NRP2,PRDM1,BMP7,NOTCH2,PDE2A,EGLN1,PROX1,PTK7,ZFPM1,SALL1,FGF8,TAB1,FGFR2,SEMA3C,SLIT3,SMARCA4,TBX5,TBX3,NDST1,WNT11,RBPJ,SALL4,LRP1,SMAD6,SMAD7
GO: Biological Process	GO:0046328	regulation of JNK cascade		3.342E-6	3.193E-2	1.717E-4	1.673E-3	41	210	MAP3K4,MAP3K5,FZD7,AKT1,SH3RF1,APP,TNFSF11,TNFRSF11A,MAP3K6,PRKN,MAP3K13,DAB2IP,RASSF2,ZEB2,PTPN1,ULK4,EPHA4,EPHB1,MECOM,TAOK3,NOD1,SFRP1,ANKRD6,NOX1,GAB1,MAP3K20,PDCD4,MAPK8IP3,FGD4,SYK,RAPGEF1,TIAM1,MAP4K1,TNXB,HMGB1,HRAS,WNT7B,IGF1R,PINK1,LMNB1,LTBR
GO: Biological Process	GO:0045860	positive regulation of protein kinase activity		3.464E-6	3.310E-2	1.770E-4	1.724E-3	91	611	ADCY9,MAP3K4,AXIN2,MAP3K5,ADORA1,ADORA2A,AKT1,DGKE,ARAF,MADD,TNFSF11,RAP2C,TNFRSF11A,TNFRSF10B,CDK5R2,NTRK2,MAP3K6,NEURL1,CD40,DGKI,CD81,MAP3K13,PDGFRB,CARD10,PLA2G1B,IQGAP3,CARD14,AKAP6,MAGED1,CSK,CSPG4,PRKAG1,PRKAR1A,RAPGEF2,MAP2K5,MAP2K6,PROX1,DAB2IP,RASSF2,DAB1,DGKG,ZEB2,PTPN1,DLG3,TNFSF15,DUSP7,DUSP9,EPHA4,EPHB2,LRRK2,TAOK3,NOD1,FGF1,FGF13,FGFR1,TAB1,PRKAG2,PIBF1,PPP1R9A,PRR5,CAMKK2,FYN,GAB1…
GO: Biological Process	GO:1902284	neuron projection extension involved in neuron projection guidance		3.659E-6	3.497E-2	1.850E-4	1.802E-3	14	38	SEMA6A,SEMA4G,NRP2,SEMA5A,SEMA5B,MEGF8,SEMA6C,SEMA3F,SEMA4F,SEMA3C,SLIT1,SLIT3,WNT3,SEMA3G
GO: Biological Process	GO:0048846	axon extension involved in axon guidance		3.659E-6	3.497E-2	1.850E-4	1.802E-3	14	38	SEMA6A,SEMA4G,NRP2,SEMA5A,SEMA5B,MEGF8,SEMA6C,SEMA3F,SEMA4F,SEMA3C,SLIT1,SLIT3,WNT3,SEMA3G
GO: Biological Process	GO:0043405	regulation of MAP kinase activity		3.685E-6	3.522E-2	1.853E-4	1.806E-3	62	372	MAP3K4,MAP3K5,ADORA1,TRIB2,ARAF,MADD,TNFSF11,TNFRSF11A,KSR1,BMP7,MAP3K6,CD40,CD81,MAP3K13,PAQR3,PDGFRB,PLA2G1B,IQGAP3,MAGED1,CSK,CSPG4,MAP2K5,MAP2K6,DAB2IP,ZEB2,PTPN1,DUSP7,DUSP8,DUSP9,RGS3,EPHA4,EPHB2,LRRK2,SPRED3,TAOK3,NOD1,FGF1,FGFR1,TAB1,SFRP1,RGS14,GAB1,SORL1,MAP3K20,PDCD4,MAPK8IP3,FGD4,SYK,RAPGEF1,GRM4,TIAM1,MAP4K1,AKAP13,TNXB,HRAS,HTR2A,WNT7B,IGF1R,INSR,KARS1,KIT,SPRY4
GO: Biological Process	GO:0030155	regulation of cell adhesion		3.911E-6	3.738E-2	1.957E-4	1.906E-3	110	777	MBP,ACVRL1,ADA,DSCAML1,FZD7,ADORA2A,ZNF608,ATXN3,AKT1,SEMA6A,MMP14,ANK3,EPB41L5,APOD,AP3B1,TNFSF11,PLPP3,SKAP1,ASS1,ZFHX3,MDGA1,MUC1,MYO10,NEXMIF,BMP7,NF2,SEMA5A,CD9,CD81,CDH1,HACD1,CDH13,ENPP2,CYTH2,GRAP2,PLXNA1,ONECUT2,COL8A1,COL16A1,PODXL,TBX21,BCAR1,CSK,PRKAR1A,PRKCE,MAP2K5,PIEZO1,DAB1,PTAFR,TESPA1,MAGI2,NUAK1,PTPRO,PTPRR,PTPRZ1,DPP4,KIF26B,DTX1,EFNB2,PLEKHA2,LEF1,EPHA8,EPHB3,EPHB6,RSU1,FBLN1…
GO: Biological Process	GO:1990138	neuron projection extension		4.048E-6	3.869E-2	2.015E-4	1.963E-3	39	197	MAP1B,RNF157,SEMA6A,CPNE5,SEMA4G,ARHGAP4,TMEM108,NRP2,WASF1,SEMA5A,SYT2,PRKN,MAP3K13,SEMA5B,PLXNA1,AATK,ITSN2,AUTS2,PTPRS,MEGF8,CDKL3,SEMA6C,SEMA3F,SEMA4F,SEMA3C,CYFIP2,SLIT1,SLIT3,DISC1,FSTL4,CLASP2,TIAM1,TTL,TNR,MGLL,FLRT3,WNT3,SEMA3G,LRP1
GO: Biological Process	GO:0090287	regulation of cellular response to growth factor stimulus		4.232E-6	4.044E-2	2.095E-4	2.041E-3	56	326	ACVRL1,SEMA6A,CITED1,MSX1,TMEM108,WASF1,LDLRAD4,NOTCH2,NUMA1,RUNX2,CDKN1C,DSTYK,HJV,ONECUT2,ADAMTS3,SOSTDC1,CHST11,ADGRA2,PRKCB,DAB2IP,HTRA1,PTPN1,LRG1,ZBTB7A,FBN2,FGF1,FGFR1,ZNF703,SFRP1,CYFIP2,WFIKKN1,PRDM16,PRDM14,SORL1,ZNF423,PBLD,SMOC2,SULF2,GPC3,GLG1,GOT1,TCF4,TCF7L2,KCP,GRB10,RNF165,NIBAN2,RBPJ,CRB2,ITGA5,PMEPA1,HTRA3,SPRY4,SMAD3,SMAD6,SMAD7
GO: Biological Process	GO:1902668	negative regulation of axon guidance		4.404E-6	4.209E-2	2.169E-4	2.113E-3	12	29	SEMA6A,SEMA4G,SEMA5A,SEMA5B,PTPRO,SEMA6C,SEMA3F,SEMA4F,SEMA3C,SLIT1,WNT3,SEMA3G
GO: Biological Process	GO:0099003	vesicle-mediated transport in synapse		4.618E-6	4.413E-2	2.254E-4	2.196E-3	48	265	ACTG1,BTBD9,ADORA2A,SCAMP5,VPS18,GIT1,APBA1,APBA2,PPFIA3,AP3B1,NAPA,AP1S2,BSN,CACNA1A,CACNA1D,BRSK2,SYT2,SYT7,DGKI,NRXN3,OTOF,SEPTIN5,DNM3,ERC2,PRKCB,PRKCE,CTBP2,SNPH,GIT2,MAGI2,EFNB2,STX2,LRRK2,ITSN1,SH3GL3,CLSTN1,SIRT2,SYN2,SYNE1,RAPGEF4,GRM4,PIP5K1C,GRIP1,GRIP2,HPCA,HTR2A,KCNH1,SLC17A6
GO: Biological Process	GO:0007398	ectoderm development		4.623E-6	4.418E-2	2.254E-4	2.196E-3	42	220	MBP,ACVR1,FZD7,MMP14,MMP15,EPB41L5,PLPP3,GRHL3,BMP7,NF2,COL8A1,COL11A1,CELSR1,PRKAR1A,MAP2K5,SOX7,GSC,MEGF8,ELF5,LEF1,STX2,EXT1,EYA2,SALL1,FGF8,FGFR1,FGFR2,SFRP1,CLASP2,GPC3,TBXT,TCF3,WNT3,WNT8B,WNT11,CRB2,ITGA5,ITGB4,LAMB1,HMGA2,LRP5,SMAD3
GO: Biological Process	GO:0099072	regulation of postsynaptic membrane neurotransmitter receptor levels		4.892E-6	4.675E-2	2.373E-4	2.312E-3	24	96	GIT1,LGI1,DNM3,CNIH3,MAGI2,DLG2,DLG3,GPC6,EFNB2,EPS8,CACNG3,GPC4,CLSTN1,SIRT2,CACNG5,IQSEC2,SYNE1,RAPGEF4,PIP5K1C,GRIP1,GRIP2,HPCA,HRAS,PORCN
GO: Biological Process	GO:0060485	mesenchyme development		4.967E-6	4.746E-2	2.397E-4	2.335E-3	54	312	ACTA1,ACVR1,ACVRL1,AXIN2,SEMA6A,EPB41L5,SEMA4G,MSX1,DACT3,NRP2,BMP7,CYP26C1,LDLRAD4,SEMA5A,PDGFRB,SEMA5B,DAB2IP,ZEB2,PTK7,GSC,MEGF8,TRIM62,LEF1,ERG,FGF8,FGFR1,FGFR2,SEMA6C,SEMA3F,SEMA4F,ZNF703,SEMA3C,SFRP1,SOX10,KBTBD8,PBLD,CLASP2,GDNF,PDCD4,STAT1,TBX5,TCF7L2,AKNA,TEAD1,TIAM1,CORO1C,WNT7B,WNT11,RBPJ,CRB2,SEMA3G,HMGA2,SMAD3,SMAD7
GO: Biological Process	GO:0051963	regulation of synapse assembly		5.014E-6	4.791E-2	2.408E-4	2.346E-3	28	122	APP,MDGA1,ADGRB1,ADGRB2,ADGRB3,NTRK2,OXTR,LRFN4,NRG2,PTPRS,FARP1,EPHB1,EPHB2,EPHB3,GPC4,PPP1R9A,ADGRL1,CLSTN1,SLIT1,CLSTN2,SLITRK2,VSTM5,ADGRL3,CUX2,GRID2,THBS2,FLRT3,IL1RAP
GO: Biological Process	GO:0097106	postsynaptic density organization		5.068E-6	4.843E-2	2.421E-4	2.359E-3	15	44	GIT1,TMEM108,DLGAP1,LRFN4,NRXN2,MAGI2,PTPRS,DLG2,DLG3,SHANK2,LRRC4,GRID2,CADM1,SHANK3,IL1RAP
GO: Biological Process	GO:2000027	regulation of animal organ morphogenesis		5.121E-6	4.894E-2	2.435E-4	2.372E-3	51	289	ACVR1,FZD7,PLEKHA4,CITED1,MSX1,GRHL3,BMP7,NFIB,ROR1,RUNX2,CDH1,CHAD,ARHGEF19,MAGED1,CELSR1,PSMA6,PSMB6,PSMB7,CASZ1,PTK7,MAGI2,DIO3,GPC6,LGR4,ETV5,SALL1,ZNRF3,GPC4,FGF1,FGF8,FGFR1,FGFR2,SEMA3C,SFRP1,SRSF6,ANKRD6,SP6,PRICKLE2,GDNF,STAT1,SULF2,AJAP1,GPC3,TBX5,TIAM1,VDR,WNT7B,WNT11,RBPJ,ITPR1,HMGA2
GO: Biological Process	GO:0048585	negative regulation of response to stimulus		5.459E-6	5.216E-2	2.582E-4	2.516E-3	234	1928	PIK3AP1,ACVR1,ADA,ADCY9,AXIN2,ADORA1,FZD9,ADORA2A,HEG1,AKT1,SEMA6A,ABCD1,MMP14,MNT,SH3RF1,GIT1,SLC25A5,CITED1,APOD,SEMA4G,MADD,PHPT1,PDE8B,DACT3,MUC1,MARCO,TNK1,TNFRSF10B,PRDM1,BMP7,NF2,NFE2L2,CYP26C1,LDLRAD4,NOTCH4,LIMD1,CAMK2B,NR4A2,SEMA5A,RUNX2,OPRD1,USP10,CD9,NEURL1,PRKN,MOSMO,CDH1,PAQR3,PDE1C,PDE2A,PDE4D,ENPP1,GPR37L1,CHRM3,SGMS1,SEMA5B,HJV,ONECUT2,NECAB2,UBQLN2,DLL4,MMP28,RRM2B,EGLN1,TBX21,…
GO: Biological Process	GO:0001822	kidney development		6.026E-6	5.758E-2	2.836E-4	2.763E-3	54	314	TSHZ3,CITED1,ARL3,ASS1,MYO1E,BMP7,NOTCH2,NPHS1,PBX1,CDKN1C,CRLF1,PDGFRB,MAGED1,PODXL,RRM2B,IRX3,HS2ST1,CUX1,PROX1,TRAF3IP1,MTSS1,MAGI2,PTPRO,PCSK9,FAT4,KIF26B,LIN28A,EFNB2,EPHA4,LRRK2,LGR4,SALL1,FMN1,FGF1,FGF8,FGFR1,FGFR2,FRAS1,SFRP1,GDNF,STAT1,KIRREL3,SULF2,GPC3,GLI2,UMOD,CYP26B1,WNT7B,WNT11,C1GALT1,NUP107,SMAD3,SMAD6,SMAD7
GO: Biological Process	GO:0050770	regulation of axonogenesis		6.143E-6	5.870E-2	2.878E-4	2.803E-3	41	215	MAP1B,MAP6,MCF2,SEMA6A,SEMA4G,ARHGAP4,CACNA1A,NTRK2,BRSK2,SEMA5A,MAP3K13,SEMA5B,PLXNA1,AATK,DAB1,ZEB2,PTPRO,PTPRS,FEZF2,MEGF8,EPHA4,EPHB2,EPHB3,CDKL3,FGF13,SEMA6C,SEMA3F,SEMA4F,SEMA3C,TRAK1,SLIT1,DISC1,FSTL4,CLASP2,TIAM1,TTL,TNR,MGLL,WNT3,SEMA3G,LRP1
GO: Biological Process	GO:0016049	cell growth		6.208E-6	5.932E-2	2.894E-4	2.819E-3	86	577	MAP1B,ACVRL1,RNF157,AKT1,SEMA6A,MMP14,PI16,APBB2,EPB41L5,APP,CPNE5,SEMA4G,MSX1,ARHGAP4,DACT3,TMEM108,TNK1,NRP2,NF2,BRAT1,WASF1,NPR1,SEMA5A,CXCL16,SYT2,PRKN,CD81,MAP3K13,LGI1,ENPP1,SEMA5B,PLXNA1,AKAP6,BCAR1,AATK,PPT1,ITSN2,AUTS2,MAP2K5,DAB2IP,ZEB2,PTPRS,HBEGF,SGK2,MEGF8,LEF1,RPS6KA1,CDKL3,MEG3,ACSL4,FBP1,FGF13,SEMA6C,SEMA3F,SEMA4F,SEMA3C,SFRP1,SIPA1,CLSTN1,CYFIP2,SLIT1,SLIT3,SMARCA2,SMARCA4,FOXP1,…
GO: Biological Process	GO:0048732	gland development		6.267E-6	5.989E-2	2.907E-4	2.832E-3	79	518	ACADM,ADA,AK4,AKT1,AIRE,MSX1,TNFSF11,ASS1,NCOA1,MTX1,TNFRSF11A,BMP7,NFIB,NOTCH2,NOTCH4,OXTR,NEURL1,PBX1,DNAAF1,CDH1,CDKN1C,PDGFRB,CLCN2,IQGAP3,PLXNA1,ONECUT2,SOSTDC1,DUOX2,NCOR2,CSN3,PROX1,PCSK9,EDA,CELA1,ELF5,LEF1,EPHB3,RPS6KA1,ETV4,ETV5,MEG3,SALL1,FGF8,FGFR1,FGFR2,ZNF703,SEMA3C,SFRP1,ATG7,FPGS,SMARCA4,NR5A1,SOX3,SOX10,GHRH,SULF2,GLI2,TBX3,TCF7L2,CARMIL2,CIT,THRA,HOXA9,CADM1,VDR,EZR,WNT3,WNT7B,W…
GO: Biological Process	GO:0051046	regulation of secretion		6.609E-6	6.315E-2	3.051E-4	2.972E-3	130	964	MBP,ADA,ADORA1,ADORA2A,PARP1,SCAMP5,VPS18,GIT1,SLC25A5,APBA1,APBA2,MADD,TNFSF11,PHPT1,PDE8B,MYH10,NAPA,TNFRSF11A,CACNA1I,CACNA1G,CDK5R2,NPHS1,CACNA1A,CACNA1C,CACNA1D,CACNA1E,NPR1,NSF,NTRK2,BRSK2,SYT2,SYT7,OSM,OXCT1,OXTR,CD40,DGKI,PRKN,CDK16,PDE1C,CACNA2D2,NRXN3,PLA2G1B,SEPTIN5,CELSR1,PRKCB,PRKCE,MAP2K6,RAB11FIP3,CPLANE2,GIT2,PTAFR,SSC5D,TNFSF15,DPP4,PDCD6IP,SIDT2,RHOT1,LRRK2,LGR4,ACSL4,FBLN1,FCER…
GO: Biological Process	GO:0051270	regulation of cellular component movement		6.665E-6	6.369E-2	3.062E-4	2.983E-3	158	1219	MCAM,ACVR1,ACVRL1,ADA,ADORA1,MTUS1,AKT1,FOXO4,SEMA6A,MMP14,ANK2,PIK3R3,EPB41L5,AIRE,APOD,APP,SEMA4G,ARHGAP4,MAPK15,PHPT1,PLPP3,ATP1A1,RAP2C,LRRC15,MYLK,NEXMIF,ADGRB1,BBS1,NRP2,BMP7,NF2,NFE2L2,LDLRAD4,CACNA1C,CAMK2B,SEMA5A,CXCL16,CD9,CD40,CD81,CD151,DNAAF1,CDH1,CDH13,PDE4D,PDGFRB,ENPP2,CARD10,SSH1,SEMA5B,SUN2,PLCG1,CMKLR1,PLXNA1,AKAP6,ONECUT2,DLL4,PODXL,MMP28,NRG2,DUOX2,BCAR1,ADGRA2,NUS1,PRKCE,CTN…
GO: Biological Process	GO:0043408	regulation of MAPK cascade		6.721E-6	6.422E-2	3.073E-4	2.994E-3	118	857	PIK3AP1,MAP3K4,MAP3K5,FZD7,ADORA1,AKT1,SEMA6A,TRIB2,SH3RF1,APP,ARAF,MADD,TNFSF11,MARCO,TNFRSF11A,KSR1,BMP7,NF2,NOTCH2,NTRK2,KSR2,MAP3K6,OSM,CD40,PRKN,CD81,MAP3K13,PAQR3,PDGFRB,GPR37L1,DSTYK,PLA2G1B,IQGAP3,NECAB2,MAGED1,CSK,CSPG4,PRKCE,RAPGEF2,MAP2K5,MAP2K6,DAB2IP,RASSF2,ZEB2,PTPN1,PTPRR,ULK4,INHBE,DUSP7,DUSP8,DUSP9,RANBP9,ECE1,RGS3,ACE2,ATP6AP2,EPHA4,EPHA8,EPHB1,EPHB2,LRRK2,MECOM,SPRED3,FBLN1,TAO…
GO: Biological Process	GO:0034329	cell junction assembly		7.262E-6	6.940E-2	3.305E-4	3.219E-3	46	254	ACTG1,ACVRL1,HEG1,MMP14,ANK2,EPB41L5,APOD,CD9,CD151,CDH1,CDH11,CDH13,ENPP2,PKP1,COL16A1,PRKCH,RAPGEF2,PTPRO,PDCD6IP,ACE2,PATJ,DLC1,FMN1,ZNF703,SFRP1,HDAC7,LIMCH1,PARD6G,NFASC,CLASP2,PARD6B,STRN,GPM6B,RAPGEF1,PIP5K1C,CDH22,PKP3,TNS1,CORO1C,WNT11,ITGA5,ITGB4,GPBAR1,LRP1,SMAD3,SMAD7
GO: Biological Process	GO:0007507	heart development		7.297E-6	6.973E-2	3.305E-4	3.220E-3	100	700	ACACB,ACADM,MB,ACVR1,ACVRL1,MEIS1,AXIN2,FZD7,HEG1,ANK2,PI16,RBM20,MSX1,MYH10,NRP2,PRDM1,BMP7,NOTCH2,CACNA1C,NRAP,OXCT1,OXTR,DNAAF1,PDE2A,PDGFRB,AKAP6,COL11A1,DLL4,EGLN1,NCOR2,FOXP4,PRKAR1A,MAP2K5,PROX1,IFT140,TRAF3IP1,IFT172,PTK7,FAT4,DSG2,ECE1,EFNB2,MEGF8,KCTD10,ERG,SPEG,MECOM,ZFPM1,RXRB,DLC1,SALL1,SCN5A,FGF1,FGF8,FGF12,FGFR1,TAB1,FGFR2,BICC1,SEMA3C,ATG7,FHOD3,DNAI1,SLC8A1,SCUBE1,ANKRD1,SLIT3,SM…
GO: Biological Process	GO:0001655	urogenital system development		7.416E-6	7.086E-2	3.343E-4	3.256E-3	62	380	ACVR1,TSHZ3,CITED1,ARL3,ASS1,MYO1E,BMP7,NOTCH2,NPHS1,PBX1,CDKN1C,CRLF1,PDGFRB,COL4A1,MAGED1,PODXL,RRM2B,IRX3,HS2ST1,CUX1,PROX1,IFT140,TRAF3IP1,MTSS1,MAGI2,PTPRO,PCSK9,FAT4,KIF26B,LIN28A,EFNB2,EPHA4,EPHB2,EPHB3,LRRK2,LGR4,MECOM,SALL1,FMN1,FGF1,FGF8,FGFR1,FGFR2,FRAS1,SFRP1,GDNF,STAT1,KIRREL3,SULF2,GPC3,GLI2,UMOD,CYP26B1,WNT7B,WNT11,IGF1R,C1GALT1,ITGB4,NUP107,SMAD3,SMAD6,SMAD7
GO: Biological Process	GO:0048565	digestive tract development		7.652E-6	7.312E-2	3.433E-4	3.345E-3	31	145	ADA,EPB41L5,ASS1,PRDM1,OXTR,DNAAF1,CDH1,SPDEF,FOXP4,IFT172,DAB1,FAT4,MEGF8,EPHB3,STX2,LGR4,SALL1,FGFR3,FGFR2,SFRP1,SOX10,GLI2,TCF7L2,ALX4,WNT11,ZIC3,C1GALT1,ITGB4,KIT,YIPF6,SMAD3
GO: Biological Process	GO:0030308	negative regulation of cell growth		7.778E-6	7.432E-2	3.473E-4	3.384E-3	41	217	ACVRL1,SEMA6A,PI16,APBB2,SEMA4G,MSX1,ARHGAP4,DACT3,TNK1,NF2,NPR1,SEMA5A,ENPP1,SEMA5B,AATK,PPT1,DAB2IP,PTPRS,CDKL3,MEG3,FBP1,FGF13,SEMA6C,SEMA3F,SEMA4F,SEMA3C,SFRP1,SIPA1,SLIT1,SLIT3,SMARCA2,SMARCA4,FOXP1,FSTL4,TNR,SH3BP4,WNT3,WNT11,SEMA3G,PRDM11,SMAD3
GO: Biological Process	GO:0001932	regulation of protein phosphorylation		8.191E-6	7.827E-2	3.641E-4	3.547E-3	201	1625	PIK3AP1,ACVR1,ACVRL1,ADCY9,MAP3K4,AXIN2,MAP3K5,FZD7,ADORA1,ADORA2A,HEG1,AKT1,SEMA6A,TRIB2,SH3RF1,PIK3R3,DGKE,APP,ARAF,MADD,SPTBN4,TNFSF11,MAPK15,PLPP3,RAP2C,MARCO,TNFRSF11A,TNFRSF10B,KSR1,BMP7,NF2,BRAT1,CDK5R2,LDLRAD4,NOTCH2,NTRK2,KSR2,CTDSP1,MAP3K6,OPRD1,OSM,NEURL1,CD40,DGKI,PRKN,CD81,MAP3K13,CDC25C,PAQR3,CDKN1C,PDE4D,CRLF1,PDGFRB,ENPP1,ENPP2,GPR37L1,CARD10,DSTYK,PLA2G1B,IQGAP3,CARD14,CNTN1,AKAP…
GO: Biological Process	GO:0035904	aorta development		8.313E-6	7.944E-2	3.678E-4	3.583E-3	19	68	ACVRL1,MYH10,MYLK,PRDM1,NOTCH4,PDE2A,PDGFRB,DLL4,PROX1,EFNB2,FGF8,TAB1,SMARCA4,NDST1,RBPJ,ADAMTS9,LOXL1,LRP1,SMAD6
GO: Biological Process	GO:0090596	sensory organ morphogenesis		8.703E-6	8.316E-2	3.832E-4	3.734E-3	53	310	MEIS1,MSX1,GRHL3,PRDM1,BMP7,MYO3A,SDK1,NOTCH2,NTRK2,OTX1,PITX3,CNGA3,COL8A1,COL8A2,PRRX1,COL11A1,CELSR1,PROX1,MFRP,CASZ1,PTK7,PTPRM,DIO3,NR2E3,SOBP,GSC,GRK1,OTOP1,EPHB1,EPHB2,IRX5,PDZD7,FBN2,SALL1,FGF8,FGFR1,FGFR3,FGFR2,ZHX2,TENM3,MEGF11,MIAT,GJB6,CDH23,GLI2,KDM2B,GNAT1,FOXN4,TDRD7,TSHR,CYP26B1,CHRNA10,LRP5
GO: Biological Process	GO:0045926	negative regulation of growth		9.292E-6	8.879E-2	4.073E-4	3.968E-3	51	295	ACVRL1,MEIS1,SEMA6A,PI16,APBB2,SEMA4G,MSX1,ARHGAP4,DACT3,TNK1,NF2,NOTCH2,NPR1,SEMA5A,ENPP1,SEMA5B,AATK,PPT1,DAB2IP,PTPRS,CDKL3,MEG3,FBP1,ATXN2,FGF13,FGFR3,SEMA6C,SEMA3F,SEMA4F,SEMA3C,SFRP1,SIPA1,SLIT1,SLIT3,SMARCA2,SMARCA4,FOXP1,FSTL4,GPC3,GNAS,WWC1,TBX5,TCF7L2,TLL2,TNR,SH3BP4,WNT3,WNT11,SEMA3G,PRDM11,SMAD3
GO: Biological Process	GO:0001704	formation of primary germ layer		9.632E-6	9.204E-2	4.127E-4	4.021E-3	39	204	MBP,ACVR1,FZD7,MMP14,MMP15,EPB41L5,PLPP3,BMP7,NF2,COL8A1,COL11A1,CELSR1,PRKAR1A,MAP2K5,SOX7,GSC,MEGF8,ELF5,LEF1,EXT1,EYA2,FGF8,FGFR1,FGFR2,SFRP1,CLASP2,GPC3,TBXT,TCF3,WNT3,WNT8B,WNT11,CRB2,ITGA5,ITGB4,LAMB1,HMGA2,LRP5,SMAD3
GO: Biological Process	GO:0001705	ectoderm formation		9.632E-6	9.204E-2	4.127E-4	4.021E-3	39	204	MBP,ACVR1,FZD7,MMP14,MMP15,EPB41L5,PLPP3,BMP7,NF2,COL8A1,COL11A1,CELSR1,PRKAR1A,MAP2K5,SOX7,GSC,MEGF8,ELF5,LEF1,EXT1,EYA2,FGF8,FGFR1,FGFR2,SFRP1,CLASP2,GPC3,TBXT,TCF3,WNT3,WNT8B,WNT11,CRB2,ITGA5,ITGB4,LAMB1,HMGA2,LRP5,SMAD3
GO: Biological Process	GO:0001706	endoderm formation		9.632E-6	9.204E-2	4.127E-4	4.021E-3	39	204	MBP,ACVR1,FZD7,MMP14,MMP15,EPB41L5,PLPP3,BMP7,NF2,COL8A1,COL11A1,CELSR1,PRKAR1A,MAP2K5,SOX7,GSC,MEGF8,ELF5,LEF1,EXT1,EYA2,FGF8,FGFR1,FGFR2,SFRP1,CLASP2,GPC3,TBXT,TCF3,WNT3,WNT8B,WNT11,CRB2,ITGA5,ITGB4,LAMB1,HMGA2,LRP5,SMAD3
GO: Biological Process	GO:0001707	mesoderm formation		9.632E-6	9.204E-2	4.127E-4	4.021E-3	39	204	MBP,ACVR1,FZD7,MMP14,MMP15,EPB41L5,PLPP3,BMP7,NF2,COL8A1,COL11A1,CELSR1,PRKAR1A,MAP2K5,SOX7,GSC,MEGF8,ELF5,LEF1,EXT1,EYA2,FGF8,FGFR1,FGFR2,SFRP1,CLASP2,GPC3,TBXT,TCF3,WNT3,WNT8B,WNT11,CRB2,ITGA5,ITGB4,LAMB1,HMGA2,LRP5,SMAD3
GO: Biological Process	GO:0007369	gastrulation		9.632E-6	9.204E-2	4.127E-4	4.021E-3	39	204	MBP,ACVR1,FZD7,MMP14,MMP15,EPB41L5,PLPP3,BMP7,NF2,COL8A1,COL11A1,CELSR1,PRKAR1A,MAP2K5,SOX7,GSC,MEGF8,ELF5,LEF1,EXT1,EYA2,FGF8,FGFR1,FGFR2,SFRP1,CLASP2,GPC3,TBXT,TCF3,WNT3,WNT8B,WNT11,CRB2,ITGA5,ITGB4,LAMB1,HMGA2,LRP5,SMAD3
GO: Biological Process	GO:0051347	positive regulation of transferase activity		9.729E-6	9.297E-2	4.150E-4	4.043E-3	103	731	ADCY9,MAP3K4,AXIN2,MAP3K5,ADORA1,ADORA2A,AKT1,TRIB2,DGKE,ARAF,MADD,C1GALT1C1,TNFSF11,MAPK15,TNKS,RAP2C,TNFRSF11A,TNFRSF10B,CDK5R2,NTRK2,MAP3K6,NEURL1,CD40,DGKI,CD81,MAP3K13,PDGFRB,CARD10,PFKFB1,DSTYK,PLA2G1B,IQGAP3,CARD14,AKAP6,MAGED1,POT1,CSK,CSPG4,PRKAG1,PRKAR1A,RAPGEF2,MAP2K5,MAP2K6,PROX1,DAB2IP,RASSF2,DAB1,DGKG,ZEB2,PTPN1,DLG3,TNFSF15,DUSP7,DUSP9,EEF1A2,EPHA4,EPHA8,EPHB2,LRRK2,TAOK3,NOD1,FGF1…
GO: Biological Process	GO:0043085	positive regulation of catalytic activity		9.935E-6	9.494E-2	4.220E-4	4.111E-3	199	1611	RALGAPA1,MBP,ADCY9,MAP3K4,AXIN2,MAP3K5,ADORA1,ADORA2A,AKT1,SIPA1L2,MMP15,ARHGAP21,TRIB2,GIT1,DGKE,APP,ARAF,MADD,ARHGAP4,C1GALT1C1,TNFSF11,MAPK15,TNKS,GRHL3,RAP2C,MYL4,DOCK11,ADGRB3,NAPA,TNFRSF11A,TNFRSF10B,ASAP2,CDK5R2,CACNA1C,CACNA1D,SLC11A2,CAMK2B,NTRK2,NR4A2,TBC1D25,MAP3K6,OPRD1,NEURL1,CD40,DGKI,CD81,MAP3K13,EVI5L,PDGFRB,CARD10,PFKFB1,ARHGAP22,TBC1D22A,DSTYK,PLA2G1B,PLCG1,CMKLR1,IQGAP3,CARD14,…
GO: Biological Process	GO:0021955	central nervous system neuron axonogenesis		1.022E-5	9.768E-2	4.321E-4	4.209E-3	14	41	SPTBN4,NFIB,NR4A2,CDH11,B4GALT5,ZEB2,EPHA4,EPHB1,EPHB2,EPHB3,ATG7,GLI2,ARHGEF28,SZT2
GO: Biological Process	GO:0035019	somatic stem cell population maintenance		1.026E-5	9.808E-2	4.321E-4	4.209E-3	21	81	BMP7,PBX1,POLR2F,TCF7L1,LIN28A,ELF5,SALL1,FGFR3,SFRP1,ZHX2,FOXP1,PRDM16,PRDM14,TCF7L2,ZIC3,RBPJ,LBH,KIT,SALL4,HMGA2,LRP5
GO: Biological Process	GO:0001505	regulation of neurotransmitter levels		1.047E-5	1.001E-1	4.389E-4	4.276E-3	67	425	BTBD9,ADORA2A,AKT1,VPS18,GIT1,PPFIA4,APBA1,APBA2,PPFIA3,APP,ASS1,NAPA,CACNA1A,CACNA1D,NTRK2,SYT2,SYT7,DGKI,PRKN,NRXN3,NRXN2,OTOF,SEPTIN5,CELSR1,PPT1,ERC2,PRKCB,PRKCE,CTBP2,FEV,CX3CR1,SNPH,GIT2,PTPRN2,SARDH,DPYD,DPYS,RHOT1,STX2,LRRK2,PPP1R9A,SLC1A2,SLC1A3,RPH3A,SLC6A1,SLC6A9,SLC6A11,TPH2,GDNF,GLA,SYN2,GPM6B,GRM4,PIP5K1C,SLC44A1,HRH3,DDAH1,PARK7,HRH1,HTR2A,HTR2C,ICA1,INSR,SLC38A1,KCNH1,SLC17A6,SMAD3
GO: Biological Process	GO:0042063	gliogenesis		1.068E-5	1.020E-1	4.443E-4	4.328E-3	58	352	ADORA2A,AKT1,MMP14,APP,PLPP3,NF2,NFIB,NFIX,MYRF,CDK5R2,NTRK2,ROR1,CD9,ENPP2,PENK,GPR37L1,B4GALT5,SUN2,PITX3,MXRA8,CSK,CSPG4,PRKCH,KDM4A,CX3CR1,DAB2IP,DAB1,PTPRZ1,DTX1,LIN28A,LEF1,EPHA4,ETV5,ATXN1,CCL3,FGFR3,ZNF365,SLC8A3,SIRT2,SMARCA4,MIAT,SOX5,ZCCHC24,SOX10,NKX6-2,DISC1,ABCC8,SYNE2,TCF7L2,SUN1,TIAM1,TRPC4,RNF112,ITGB4,BMERB1,LAMB1,HMGA2,LRP1
GO: Biological Process	GO:1903522	regulation of blood circulation		1.069E-5	1.022E-1	4.443E-4	4.328E-3	57	344	ADA,ADORA1,AKT1,ANK2,SPTBN4,ATP1A1,ATP1A3,MYL4,CACNA1G,CACNA1C,CACNA1D,CACNA1E,CACNA1S,NPR1,NPR2,CACNG1,CASQ1,OXTR,PDE4D,CACNA2D2,CHRM3,AKAP6,PTAFR,DMPK,DSG2,HBEGF,ECE1,ACE2,IRX5,KCNIP3,KCNIP1,CACNG3,SCN5A,FGF13,SLC8A2,SLC8A1,SLC8A3,CORIN,CACNG5,SREBF1,NMU,GNAI3,TBXAS1,FOXN4,THRA,HRH1,HTR2A,HTR2C,ITPR1,ITPR2,ITPR3,KCNA5,KCND3,KCNH2,KCNQ1,SMAD6,SMAD7
GO: Biological Process	GO:0099175	regulation of postsynapse organization		1.130E-5	1.079E-1	4.651E-4	4.531E-3	28	127	ABHD17A,FZD9,LRFN2,NRP2,CAMK2B,ARHGAP22,LRFN4,SSH1,EGLN1,CHMP2B,DNM3,PTPRS,EPHA4,LRRK2,BAIAP2,SEMA3F,PPP1R9A,FYN,CUX2,RAPGEF4,GRID2,SRCIN1,TIAM1,GRIP2,SHANK3,TANC1,IL1RAP,LRP5
GO: Biological Process	GO:0010562	positive regulation of phosphorus metabolic process		1.134E-5	1.084E-1	4.651E-4	4.531E-3	163	1277	ACVR1,ACVRL1,ADCY9,MAP3K4,AXIN2,MAP3K5,FZD7,ADORA1,ADORA2A,AKT1,SH3RF1,PIK3R3,DGKE,APP,ARAF,MADD,TNFSF11,MAPK15,SLC25A12,PLPP3,RAP2C,MARCO,TNFRSF11A,TNFRSF10B,KSR1,BMP7,BRAT1,CDK5R2,NOTCH2,NTRK2,KSR2,MAP3K6,OPRD1,OSM,NEURL1,CD40,DGKI,PRKN,CD81,MAP3K13,CRLF1,PDGFRB,ENPP2,GPR37L1,CARD10,PFKFB1,DSTYK,PLA2G1B,IQGAP3,CARD14,CNTN1,AKAP6,NECAB2,MAGED1,CSK,CSPG4,PRKAG1,PRKAR1A,PRKCE,RAPGEF2,MAP2K5,MAP2K6…
GO: Biological Process	GO:0045937	positive regulation of phosphate metabolic process		1.134E-5	1.084E-1	4.651E-4	4.531E-3	163	1277	ACVR1,ACVRL1,ADCY9,MAP3K4,AXIN2,MAP3K5,FZD7,ADORA1,ADORA2A,AKT1,SH3RF1,PIK3R3,DGKE,APP,ARAF,MADD,TNFSF11,MAPK15,SLC25A12,PLPP3,RAP2C,MARCO,TNFRSF11A,TNFRSF10B,KSR1,BMP7,BRAT1,CDK5R2,NOTCH2,NTRK2,KSR2,MAP3K6,OPRD1,OSM,NEURL1,CD40,DGKI,PRKN,CD81,MAP3K13,CRLF1,PDGFRB,ENPP2,GPR37L1,CARD10,PFKFB1,DSTYK,PLA2G1B,IQGAP3,CARD14,CNTN1,AKAP6,NECAB2,MAGED1,CSK,CSPG4,PRKAG1,PRKAR1A,PRKCE,RAPGEF2,MAP2K5,MAP2K6…
GO: Biological Process	GO:0060828	regulation of canonical Wnt signaling pathway		1.240E-5	1.185E-1	5.063E-4	4.932E-3	51	298	AXIN2,FZD7,FZD9,PLEKHA4,DACT3,TNKS,LIMD1,SEMA5A,PRKN,CDH1,SOSTDC1,ADGRA2,FAM53B,DAB2IP,PSMA6,PSMB6,PSMB7,PTK7,SOX7,PTPRO,RBX1,EDA,RNF220,LGR6,APC2,LRRK2,LGR4,ZNRF3,FGFR3,GPC5,FGFR2,BICC1,ZNF703,SFRP1,ANKRD6,SOX10,DISC1,KANK1,SULF2,GPC3,RBMS3,TCF7L2,RAPGEF1,THRA,NRARP,UBE2B,WNT11,NKD2,RBPJ,WNK2,SMAD3
GO: Biological Process	GO:0090276	regulation of peptide hormone secretion		1.318E-5	1.260E-1	5.361E-4	5.223E-3	45	252	SLC25A5,MADD,TNFSF11,PHPT1,PDE8B,CACNA1A,CACNA1C,CACNA1D,CACNA1E,BRSK2,SYT7,OXCT1,PRKN,CDK16,PDE1C,CACNA2D2,PRKCE,DPP4,SIDT2,SFRP1,ATG7,ITSN1,UQCC2,SREBF1,NMU,GHRH,ABCC8,GPLD1,TCF7L2,FFAR2,RAPGEF4,SIRT4,TIAM1,HTR2C,ICA1,C1QTNF12,ITPR1,ITPR2,ITPR3,KCNA5,KCNB1,KCNQ1,HMGA2,LRP1,LRP5
GO: Biological Process	GO:0048843	negative regulation of axon extension involved in axon guidance		1.327E-5	1.268E-1	5.373E-4	5.234E-3	11	27	SEMA6A,SEMA4G,SEMA5A,SEMA5B,SEMA6C,SEMA3F,SEMA4F,SEMA3C,SLIT1,WNT3,SEMA3G
GO: Biological Process	GO:0043010	camera-type eye development		1.374E-5	1.313E-1	5.541E-4	5.398E-3	59	363	ACVRL1,MEIS1,GRHL3,MYH10,BMP7,BMPR1B,NF2,NHS,SDK1,NOTCH2,CACNA1C,CACNA1S,NTRK2,CDKN1C,PDE6B,PDGFRB,CLCN2,PITX3,CNGA3,COL4A1,COL8A1,COL8A2,DLL4,CRYBB3,PROX1,IFT140,TRAF3IP1,MFRP,ZEB2,CASZ1,PTPRM,DIO3,NR2E3,GRK1,EPHB1,EPHB2,IRX5,FBN2,FGFR3,FGFR2,ZHX2,TENM3,SMARCA4,MEGF11,MIAT,TTLL5,KDM2B,GNAT1,FOXN4,TDRD7,HPCA,USH2A,WNT7B,BCL11B,MDM1,LIMK2,LMX1B,LRP5,SMAD3
GO: Biological Process	GO:0003013	circulatory system process		1.427E-5	1.364E-1	5.731E-4	5.583E-3	90	624	ACVRL1,ADA,ADORA1,ADORA2A,HEG1,AKT1,ANK2,SPTBN4,ATP1A1,ATP1A3,MYL4,NFE2,CACNA1G,CACNA1C,CACNA1D,CACNA1E,CACNA1S,NPR1,NPR2,CACNG1,CASQ1,OXTR,PDE2A,PDE4D,CACNA2D2,GPR37L1,CHRM3,PLCB3,AKAP6,DLL4,PON1,MAP2K6,PTAFR,PTPRM,PTPRO,CYB5R3,DMPK,DSG2,HBEGF,ECE1,PPCS,ACE2,ATP6AP2,IRX5,KCNIP3,KCNIP1,CACNG3,SCN5A,FGF12,FGF13,SLC2A5,SLC8A2,SLC8A1,SLC8A3,NOX1,CORIN,CACNG5,FYN,SREBF1,STAT1,NMU,GNAI3,GNAS,TBXAS1,FO…
GO: Biological Process	GO:0043406	positive regulation of MAP kinase activity		1.457E-5	1.393E-1	5.827E-4	5.677E-3	49	284	MAP3K4,MAP3K5,ADORA1,ARAF,MADD,TNFSF11,TNFRSF11A,MAP3K6,CD40,CD81,MAP3K13,PDGFRB,PLA2G1B,IQGAP3,MAGED1,CSK,CSPG4,MAP2K5,MAP2K6,DAB2IP,ZEB2,PTPN1,DUSP7,DUSP9,EPHA4,EPHB2,LRRK2,TAOK3,NOD1,FGF1,FGFR1,TAB1,GAB1,MAP3K20,MAPK8IP3,FGD4,SYK,RAPGEF1,GRM4,TIAM1,MAP4K1,AKAP13,HRAS,HTR2A,WNT7B,IGF1R,INSR,KARS1,KIT
GO: Biological Process	GO:0098742	cell-cell adhesion via plasma-membrane adhesion molecules		1.480E-5	1.414E-1	5.892E-4	5.740E-3	50	292	MBP,MCAM,ACVR1,TENM2,DSCAML1,MDGA1,CADM3,SDK1,IGSF11,CDH1,PCDH9,CDH11,CDH13,PRTG,LRFN4,CELSR1,MAP2K5,DAB1,JAML,MAGI2,PTPRM,PTPRR,PTPRS,NECTIN2,FAT4,DSG2,GPC4,ADGRL1,CLSTN1,TENM3,CDH23,CLSTN2,LRRC4,KIRREL3,SLITRK2,ADGRL3,PCDHGB6,PCDHGA11,PCDHB7,PCDHAC1,GRID2,CDH22,IGSF21,CLDN14,CADM1,UMOD,FLRT3,IL1RAP,CRB2,ITGA5
GO: Biological Process	GO:0106027	neuron projection organization		1.488E-5	1.422E-1	5.900E-4	5.748E-3	24	102	ABCD1,APP,ATP1A3,CAMK2B,DNM3,DCTN1,EPHA4,EPHB1,EPHB2,EPHB3,LRRK2,BAIAP2,PPP1R9A,ZNF365,RPH3A,SHANK2,FYN,CUX2,SRCIN1,TIAM1,SHANK3,IGF1R,TANC1,INSR
GO: Biological Process	GO:0034765	regulation of ion transmembrane transport		1.512E-5	1.445E-1	5.970E-4	5.816E-3	80	539	KCNH7,TPCN1,AKT1,REM1,ANK2,ANK3,APP,KCNK5,CACNA1I,CACNA1G,CACNA1A,CACNA1C,CACNA1D,CACNA1E,CACNA1S,CACNG1,CASQ1,CLIC6,SHISA9,HTR3B,PDE4D,PIRT,CACNA2D2,PDZK1,CLCN2,AHNAK,PLCG1,PLCG2,AKAP6,PRKCE,PTAFR,CNIH3,DLG2,DLG3,PCSK9,DPP6,EPHB2,KCNIP3,KCNIP1,CACNG3,KCNU1,SCN4A,SCN5A,SCN8A,FGF12,RPH3A,SLC8A1,THADA,NOX1,SHANK2,CNKSR3,CACNG5,FYN,ANO9,JPH4,ABCC8,ACSL6,CRACR2A,HK1,PARK7,HPCA,KCNH6,UTRN,SHANK3,PINK1…
GO: Biological Process	GO:0060562	epithelial tube morphogenesis		1.542E-5	1.474E-1	6.066E-4	5.909E-3	63	397	ACVR1,ACVRL1,MMP14,SHROOM3,CITED1,GRHL3,BMP7,NOTCH2,NOTCH4,SEMA5A,PBX1,DNAAF1,COL4A1,MAGED1,DLL4,PODXL,SOSTDC1,IRX3,CELSR1,HS2ST1,CTSD,PROX1,IFT172,MTSS1,ZEB2,PTK7,RASIP1,FAT4,KIF26B,EFNB2,MEGF8,LEF1,EPHA4,ETV4,LGR4,ETV5,DLC1,SALL1,FMN1,FGF1,FGF8,FGFR2,SFRP1,FOXP1,NUP50,GDNF,GPC3,GLI2,KDM2B,TBXT,TBX3,FOXN4,TEAD1,NRARP,VDR,WNT11,SHANK3,ZIC3,RBPJ,SALL4,HMGA2,LRP5,SMAD3
GO: Biological Process	GO:0034332	adherens junction organization		1.569E-5	1.500E-1	6.147E-4	5.988E-3	31	150	ACVRL1,MMP14,EPB41L5,APOD,CADM3,PLEKHA7,CDH1,CDH11,CDH13,ENPP2,COL16A1,CSK,MTSS1,NECTIN2,DLC1,FMN1,ZNF703,SFRP1,LIMCH1,CLASP2,MAPRE2,GPM6B,PIP5K1C,CDH22,RASSF8,CORO1C,CADM1,KIFC3,LRP1,SMAD3,SMAD7
GO: Biological Process	GO:0014706	striated muscle tissue development		1.580E-5	1.510E-1	6.163E-4	6.004E-3	72	472	ACADM,ACTA1,ACVR1,MEIS1,FZD7,HEG1,PI16,MYH10,BMP7,NPHS1,CACNA1S,NRAP,CASQ1,NEURL1,PAX7,PDGFRB,GTF3C5,AKAP6,COL11A1,DLL4,EGLN1,RBFOX1,PRKAR1A,PROX1,BOC,PSMA6,DSG2,TSC22D3,EFNB2,MYH14,LEF1,EPHB1,SPEG,ZFPM1,MEG3,EYA2,RXRB,FGF1,FGF8,FGFR1,FGFR2,SEMA3C,ATG7,UQCC2,FHOD3,HDAC7,SLC8A1,SIRT2,ANKRD1,DMRTA2,FOXP1,MEGF10,SIK1,TBXT,POPDC3,MYO18B,TBX5,TBX3,TCF7L2,NR2F2,TLL2,AKAP13,HLF,TTN,CYP26B1,NIBAN2,RBPJ,A…
GO: Biological Process	GO:0031503	protein-containing complex localization		1.594E-5	1.523E-1	6.190E-4	6.031E-3	96	678	GIT1,CDC14A,ARL3,MAPK15,BBS1,UBXN10,NUP98,ODF2,TTLL8,NEURL1,DNAAF1,EVI5L,LGI1,CFAP54,TBC1D22A,RBM15B,ATXN10,AKAP6,ONECUT2,DNM3,CROCC,USP6NL,CPLANE2,IFT140,TRAF3IP1,IFT172,DCTN1,CNIH3,MAGI2,HAUS4,ZC3H11A,KLHL21,PURA,ULK4,DLG2,DLG3,DNAH8,GPC6,RFX4,EFNB2,JHY,SRRM1,ABCC4,TBC1D2,CACNG3,TBC1D16,GPC4,PIBF1,CASC3,SRSF6,CLSTN1,ABLIM3,ZNF365,DNAI1,SIRT2,NDC1,RAB3IP,CDK5RAP2,CACNG5,PCID2,NUP50,DISC1,SEPTIN9…
GO: Biological Process	GO:0048568	embryonic organ development		1.615E-5	1.543E-1	6.247E-4	6.086E-3	76	506	ACVR1,ADA,DSCAML1,AKT1,MMP14,CITED1,MSX1,NCOA1,GRHL3,PRDM1,BMP7,MYO3A,NFE2,NOTCH2,RUNX2,OTX1,PBX1,DNAAF1,CDKN1C,PDGFRB,HS6ST1,PRRX1,COL11A1,SLC39A3,EGLN1,CHST11,CELSR1,PROX1,IFT140,TRAF3IP1,IFT172,PTK7,SOBP,GSC,MEGF8,OTOP1,LEF1,EPHB2,IRX5,ESRRB,PDZD7,ZFPM1,FBN2,SALL1,FGF8,FGFR1,FGFR2,FLT3LG,SLC8A1,SMARCA4,GAB1,GJB6,CDH23,GDNF,GLI2,KDM2B,TBXT,GNAS,TBX3,TCF7L2,FOXN4,TEAD1,NR2F2,TSHR,ALX4,NDST1,WNT7…
GO: Biological Process	GO:0097120	receptor localization to synapse		1.642E-5	1.569E-1	6.326E-4	6.163E-3	19	71	GIT1,LGI1,CNIH3,MAGI2,DLG2,DLG3,GPC6,CACNG3,GPC4,CLSTN1,CACNG5,IQSEC2,RAPGEF4,GRIP1,GRIP2,HRAS,ANKS1B,KIF5A,KIF5C
GO: Biological Process	GO:0050769	positive regulation of neurogenesis		1.678E-5	1.604E-1	6.433E-4	6.267E-3	86	592	MAP1B,MAP6,RNF157,SEMA6A,ENC1,CPNE5,SCARF1,NCOA1,BMP7,NEUROD2,NFE2L2,CAMK2B,NTRK2,SEMA5A,SYT2,NEURL1,PRKN,MAP3K13,ENPP2,PLXNA1,CNTN1,IRX3,RGS6,ITSN2,PRKCH,KDM4A,RAPGEF2,CUX1,CX3CR1,PROX1,DAB2IP,DAB1,ZEB2,PTK7,MAGI2,PTPRZ1,FEZF2,LIN28A,MEGF8,FBXO31,EPHA4,EPHB2,CDKL3,ETV5,SALL1,ATXN1,CCL3,FGFR1,BAIAP2,ITSN1,PPP1R9A,SH3GL3,ZNF365,TRAK1,RGS14,SHANK2,TENM3,ANKRD1,DMRTA2,SPEN,FYN,SOX10,ZNF609,NKX6-2,DI…
GO: Biological Process	GO:0007169	transmembrane receptor protein tyrosine kinase signaling pathway		1.683E-5	1.608E-1	6.433E-4	6.267E-3	106	767	ACTG1,ADORA1,AKT1,FOXO4,SEMA6A,IRS4,GIT1,PIK3R3,APOD,APP,TMEM108,MYO1E,NRP2,VWA2,WASF1,ATP6V0E1,NTRK2,ROR1,RUNX2,NEURL1,REPS2,CDH13,PDGFRB,ENPP1,BLNK,DSTYK,PLCG1,COL4A1,ADAMTS3,POLR2F,NRG2,BCAR1,ADGRA2,NUS1,CSPG4,PRKCB,RAPGEF2,DAB2IP,RASSF2,MTSS1,ELMO1,PTPN1,PTPRR,FAT4,HBEGF,ARPC1B,EFNB2,EPHA4,EPHA8,EPHB1,EPHB2,EPHB3,EPHB6,ATXN1,FGF1,FGF8,FGF12,FGFR1,FGFR3,FGFR2,BAIAP2,ITSN1,SHB,CYFIP2,FGF22,DNAI…
GO: Biological Process	GO:0007018	microtubule-based movement		1.769E-5	1.690E-1	6.734E-4	6.560E-3	95	671	MAP1B,MAP6,ARHGAP21,KIF6,APBA1,APP,AP3B1,CDC14A,MADD,ARL3,MAPK15,TMEM108,KIF1A,BBS1,CACNA1I,BSN,WASF1,UBXN10,CACNA1E,ODF2,TTLL8,NEURL1,DNAAF1,EVI5L,CFAP251,CFAP54,TBC1D22A,SUN2,TAF7L,ATXN10,PLTP,CATSPERZ,ONECUT2,DPCD,CFAP61,CROCC,USP6NL,CPLANE2,IFT140,TRAF3IP1,IFT172,DCTN1,HAUS4,PURA,ULK4,DLG2,DNAH6,DNAH8,DNAH9,KIF26B,RFX4,LRPPRC,MEGF8,DYNC1LI1,CFAP69,RHOT1,JHY,ABCC4,KIAA0319L,TBC1D2,TBC1D16,PIBF…
GO: Biological Process	GO:0030177	positive regulation of Wnt signaling pathway		1.780E-5	1.701E-1	6.749E-4	6.575E-3	36	187	AXIN2,FZD9,PLEKHA4,TNKS,SEMA5A,ADGRA2,FAM53B,PSMA6,PSMB6,PSMB7,ZEB2,PTK7,EDA,RNF220,ATP6AP2,LGR6,LRRK2,LGR4,SALL1,FGFR3,GPC5,FGFR2,SFRP1,ANKRD6,SMARCA4,DISC1,KANK1,SULF2,GPC3,THRA,NRARP,UBE2B,WNT3,RBPJ,WNK2,SMAD3
GO: Biological Process	GO:0048640	negative regulation of developmental growth		1.812E-5	1.732E-1	6.844E-4	6.668E-3	29	137	MEIS1,SEMA6A,PI16,SEMA4G,ARHGAP4,SEMA5A,SEMA5B,AATK,PTPRS,CDKL3,ATXN2,FGF13,FGFR3,SEMA6C,SEMA3F,SEMA4F,SEMA3C,SFRP1,SLIT1,FOXP1,FSTL4,GNAS,WWC1,TBX5,TCF7L2,TLL2,TNR,WNT3,SEMA3G
GO: Biological Process	GO:0002791	regulation of peptide secretion		1.862E-5	1.779E-1	7.005E-4	6.824E-3	85	585	MBP,ADORA1,ADORA2A,PARP1,SCAMP5,SLC25A5,MADD,TNFSF11,PHPT1,PDE8B,MYH10,CACNA1A,CACNA1C,CACNA1D,CACNA1E,BRSK2,SYT7,OSM,OXCT1,CD40,PRKN,CDK16,PDE1C,CACNA2D2,PLA2G1B,PRKCE,RAB11FIP3,SSC5D,TNFSF15,DPP4,SIDT2,LRRK2,LGR4,FBLN1,CCL1,CCL3,SFRP1,ATG7,OTUD5,ITSN1,UQCC2,RAB11FIP1,FRMD4A,ANKRD1,FOXP1,CD276,SREBF1,ARFIP1,NMU,GHRH,ABCC8,SYK,GPLD1,TCF7L2,CARMIL2,FFAR2,RAPGEF4,SRCIN1,TMBIM6,ATP13A2,SIRT4,TIAM1,H…
GO: Biological Process	GO:0042327	positive regulation of phosphorylation		1.978E-5	1.891E-1	7.414E-4	7.223E-3	153	1197	ACVR1,ACVRL1,ADCY9,MAP3K4,AXIN2,MAP3K5,FZD7,ADORA1,ADORA2A,AKT1,SH3RF1,PIK3R3,DGKE,APP,ARAF,MADD,TNFSF11,MAPK15,PLPP3,RAP2C,MARCO,TNFRSF11A,TNFRSF10B,KSR1,BMP7,BRAT1,CDK5R2,NOTCH2,NTRK2,KSR2,MAP3K6,OPRD1,OSM,NEURL1,CD40,DGKI,CD81,MAP3K13,CRLF1,PDGFRB,ENPP2,GPR37L1,CARD10,PFKFB1,DSTYK,PLA2G1B,IQGAP3,CARD14,CNTN1,AKAP6,NECAB2,MAGED1,CSK,CSPG4,PRKAG1,PRKAR1A,PRKCE,RAPGEF2,MAP2K5,MAP2K6,CX3CR1,PROX1,…
GO: Biological Process	GO:0021952	central nervous system projection neuron axonogenesis		2.003E-5	1.914E-1	7.477E-4	7.284E-3	11	28	SPTBN4,NFIB,NR4A2,CDH11,ZEB2,EPHA4,EPHB1,EPHB2,EPHB3,GLI2,SZT2
GO: Biological Process	GO:0022029	telencephalon cell migration		2.039E-5	1.948E-1	7.580E-4	7.384E-3	19	72	MDGA1,NRP2,CDK5R2,SUN2,CX3CR1,DAB2IP,DAB1,FEZF2,LRRK2,FGF13,FGFR1,SLIT1,SLIT3,DISC1,SYNE2,SUN1,TNR,BMERB1,LAMB1
GO: Biological Process	GO:0048841	regulation of axon extension involved in axon guidance		2.120E-5	2.026E-1	7.851E-4	7.649E-3	12	33	SEMA6A,SEMA4G,SEMA5A,SEMA5B,MEGF8,SEMA6C,SEMA3F,SEMA4F,SEMA3C,SLIT1,WNT3,SEMA3G
GO: Biological Process	GO:0003015	heart process		2.175E-5	2.079E-1	8.026E-4	7.819E-3	53	320	ADA,ADORA1,ANK2,SPTBN4,ATP1A1,ATP1A3,MYL4,CACNA1G,CACNA1C,CACNA1D,CACNA1E,CACNA1S,NPR1,NPR2,CACNG1,CASQ1,PDE4D,CACNA2D2,AKAP6,MAP2K6,DMPK,DSG2,HBEGF,PPCS,ACE2,IRX5,KCNIP3,KCNIP1,CACNG3,SCN5A,FGF12,FGF13,SLC8A2,SLC8A1,SLC8A3,CORIN,CACNG5,FYN,SREBF1,NMU,GNAI3,FOXN4,THRA,AKAP13,TTN,ITPR1,ITPR2,ITPR3,KCNA5,KCND3,KCNH2,KCNQ1,SMAD7
GO: Biological Process	GO:0030334	regulation of cell migration		2.206E-5	2.108E-1	8.107E-4	7.898E-3	137	1052	MCAM,ACVR1,ACVRL1,ADA,ADORA1,MTUS1,AKT1,FOXO4,SEMA6A,MMP14,PIK3R3,EPB41L5,AIRE,APOD,APP,SEMA4G,ARHGAP4,MAPK15,PLPP3,RAP2C,LRRC15,MYLK,NEXMIF,ADGRB1,NRP2,BMP7,NF2,NFE2L2,LDLRAD4,CAMK2B,SEMA5A,CXCL16,CD9,CD40,CD81,CD151,CDH1,CDH13,PDGFRB,ENPP2,CARD10,SSH1,SEMA5B,SUN2,PLCG1,CMKLR1,PLXNA1,ONECUT2,DLL4,PODXL,MMP28,BCAR1,ADGRA2,NUS1,PRKCE,CTNNA2,RAPGEF2,MAP2K5,CX3CR1,PROX1,DAB2IP,SCRT1,PTAFR,MAGI2,PTPR…
GO: Biological Process	GO:0061351	neural precursor cell proliferation		2.264E-5	2.163E-1	8.280E-4	8.067E-3	36	189	FZD9,KIF1A,BBS1,NF2,GPR37L1,PITX3,DLL4,NCOR2,CX3CR1,PROX1,MELK,ZEB2,PTPRZ1,LEF1,EPHB1,LRRK2,RSU1,FABP7,SALL1,FGF8,FGF13,FGFR1,FGFR2,SIRT2,SMARCA1,DMRTA2,SOX5,SOX10,DISC1,GLI2,KDM2B,ACSL6,AKNA,RAPGEF1,WNT7B,HMGA2
GO: Biological Process	GO:0060537	muscle tissue development		2.277E-5	2.176E-1	8.280E-4	8.067E-3	74	494	ACADM,ACTA1,ACVR1,MEIS1,FZD7,HEG1,TSHZ3,PI16,MYH10,MYLK,BMP7,NPHS1,CACNA1S,NRAP,CASQ1,NEURL1,PAX7,PDGFRB,GTF3C5,AKAP6,COL11A1,DLL4,EGLN1,RBFOX1,PRKAR1A,PROX1,BOC,PSMA6,DSG2,TSC22D3,EFNB2,MYH14,LEF1,EPHB1,SPEG,ZFPM1,MEG3,EYA2,RXRB,FGF1,FGF8,FGFR1,FGFR2,SEMA3C,ATG7,UQCC2,FHOD3,HDAC7,SLC8A1,SIRT2,ANKRD1,DMRTA2,FOXP1,MEGF10,SIK1,TBXT,POPDC3,MYO18B,TBX5,TBX3,TCF7L2,NR2F2,TLL2,AKAP13,HLF,TTN,CYP26B1,NI…
GO: Biological Process	GO:1903530	regulation of secretion by cell		2.279E-5	2.178E-1	8.280E-4	8.067E-3	120	898	MBP,ADORA1,ADORA2A,PARP1,SCAMP5,VPS18,GIT1,SLC25A5,APBA1,APBA2,MADD,TNFSF11,PHPT1,PDE8B,MYH10,NAPA,CACNA1I,CACNA1G,CDK5R2,CACNA1A,CACNA1C,CACNA1D,CACNA1E,NSF,NTRK2,BRSK2,SYT2,SYT7,OSM,OXCT1,OXTR,CD40,DGKI,PRKN,CDK16,PDE1C,CACNA2D2,NRXN3,PLA2G1B,SEPTIN5,CELSR1,PRKCB,PRKCE,RAB11FIP3,CPLANE2,GIT2,PTAFR,SSC5D,TNFSF15,DPP4,PDCD6IP,SIDT2,RHOT1,LRRK2,LGR4,FBLN1,FCER1G,CCL1,CCL3,FGFR1,SFRP1,ATG7,OTUD5,IT…
GO: Biological Process	GO:0034762	regulation of transmembrane transport		2.380E-5	2.275E-1	8.616E-4	8.394E-3	91	641	KCNH7,UPK3B,TPCN1,AKT1,REM1,ANK2,ANK3,APP,KCNK5,NFE2L2,CACNA1I,CACNA1G,CACNA1A,CACNA1C,CACNA1D,CACNA1E,CACNA1S,CACNG1,CASQ1,CLIC6,SHISA9,HTR3B,PDE4D,PIRT,CACNA2D2,ENPP1,PDZK1,CLCN2,AHNAK,PLA2G1B,PLCG1,PLCG2,AKAP6,PRKCB,PRKCE,PTAFR,CNIH3,DLG2,DLG3,PCSK9,DPP6,EPHB2,KCNIP3,KCNIP1,CACNG3,KCNU1,SCN4A,SCN5A,SCN8A,FGF12,PRKAG2,SLC1A2,RPH3A,SLC8A1,THADA,NOX1,SHANK2,CNKSR3,CACNG5,FYN,ANO9,JPH4,GPC3,ABCC8,…
GO: Biological Process	GO:0051130	positive regulation of cellular component organization		2.437E-5	2.329E-1	8.787E-4	8.561E-3	169	1351	MAP1B,MAP6,TENM2,RNF157,MAP3K4,CRACD,PARP1,USP36,ANK1,ENC1,EPB41L5,APP,CPNE5,SCARF1,MSX1,MAPK15,SKAP1,TNKS,MUC1,DOCK11,LRSAM1,ADGRB1,ADGRB2,ADGRB3,BMP7,MYO3A,NEUROD2,NF2,NFATC2,NFE2L2,NMT1,WASF1,NPHS1,CAMK2B,NTRK2,NUMA1,SEMA5A,SYT2,SYT7,OXTR,NEURL1,PRKN,CD151,MAP3K13,PAX7,PDGFRB,ENPP2,KPNA7,SSH1,PIP4K2A,LMOD1,PLCG2,PLXNA1,PMAIP1,CNTN1,COL16A1,POT1,PPT1,ITSN2,DNM3,AUTS2,PRKCE,CTNNA2,RAPGEF2,CROCC,…
GO: Biological Process	GO:1901700	response to oxygen-containing compound		2.778E-5	2.655E-1	9.978E-4	9.721E-3	220	1839	ABCA2,MAP1B,MB,ADA,ADCY9,MAP3K5,FZD7,GRAMD1B,PARP1,ARID1B,AKT1,FOXO4,MMP15,UNC79,IRS4,PIK3R3,CITED1,APOD,APP,MAPK15,PHPT1,PDE8B,ASS1,NCOA1,ATP1A1,ATP1A3,CATSPERG,NPAS4,TNFRSF11A,PRDM1,FCSK,BMP7,BPI,NFE2L2,KLF9,NFKBIB,VWA2,SDK1,CACNA1A,CACNA1D,CACNA1E,ATP6V0E1,NTRK2,BRSK2,NR4A2,CXCL16,MAP7,OPRD1,OXCT1,OXTR,CD9,NEURL1,PRKN,HTR3B,CDH1,CDK16,PDE1C,PDE2A,PDE4D,PDGFRB,ENPP1,PENK,GPR37L1,PFKFB1,CHRM3,SG…
GO: Biological Process	GO:0001934	positive regulation of protein phosphorylation		2.788E-5	2.664E-1	9.978E-4	9.721E-3	146	1140	ACVR1,ACVRL1,ADCY9,MAP3K4,AXIN2,MAP3K5,FZD7,ADORA1,ADORA2A,AKT1,SH3RF1,PIK3R3,DGKE,APP,ARAF,MADD,TNFSF11,MAPK15,PLPP3,RAP2C,MARCO,TNFRSF11A,TNFRSF10B,KSR1,BMP7,BRAT1,CDK5R2,NOTCH2,NTRK2,KSR2,MAP3K6,OPRD1,OSM,NEURL1,CD40,DGKI,CD81,MAP3K13,CRLF1,PDGFRB,ENPP2,GPR37L1,CARD10,DSTYK,PLA2G1B,IQGAP3,CARD14,CNTN1,AKAP6,NECAB2,MAGED1,CSK,CSPG4,PRKAG1,PRKAR1A,PRKCE,RAPGEF2,MAP2K5,MAP2K6,CX3CR1,PROX1,DAB2IP,…
GO: Biological Process	GO:2000147	positive regulation of cell motility		2.849E-5	2.722E-1	1.016E-3	9.896E-3	91	644	MCAM,ACVR1,AKT1,FOXO4,SEMA6A,MMP14,PIK3R3,EPB41L5,APP,SEMA4G,PHPT1,PLPP3,LRRC15,MYLK,NRP2,BMP7,NFE2L2,SEMA5A,CXCL16,CD40,CD151,CDH13,PDGFRB,ENPP2,SSH1,SEMA5B,SUN2,PLCG1,CMKLR1,ONECUT2,PODXL,DUOX2,BCAR1,ADGRA2,NUS1,PRKCE,RAPGEF2,PROX1,DAB2IP,PTAFR,PTPRZ1,HBEGF,FBXO31,LGR6,CFAP69,LEF1,SMIM22,FBLN1,ATP8A1,FGF1,CCL1,CCL3,FGFR1,SEMA6C,SEMA3F,SEMA4F,ZNF703,SEMA3C,RRAS2,PRR5,HDAC7,SLC8A1,FOXP1,PRDM14,GA…
GO: Biological Process	GO:0099084	postsynaptic specialization organization		2.910E-5	2.781E-1	1.034E-3	1.007E-2	15	50	GIT1,TMEM108,DLGAP1,LRFN4,NRXN2,MAGI2,PTPRS,DLG2,DLG3,SHANK2,LRRC4,GRID2,CADM1,SHANK3,IL1RAP
GO: Biological Process	GO:0045859	regulation of protein kinase activity		2.929E-5	2.798E-1	1.036E-3	1.010E-2	120	903	ADCY9,MAP3K4,AXIN2,MAP3K5,ADORA1,ADORA2A,HEG1,AKT1,TRIB2,DGKE,APP,ARAF,MADD,TNFSF11,RAP2C,TNFRSF11A,TNFRSF10B,KSR1,BMP7,NF2,CDK5R2,NTRK2,MAP3K6,NEURL1,CD40,DGKI,CD81,MAP3K13,CDC25C,PAQR3,CDKN1C,PDGFRB,ENPP1,CARD10,PLA2G1B,IQGAP3,CARD14,AKAP6,MAGED1,PPP2R5C,CSK,CSPG4,PRKAG1,PRKAR1A,RAPGEF2,MAP2K5,MAP2K6,PROX1,DAB2IP,RASSF2,DAB1,DGKG,ZEB2,PTPN1,RASIP1,DLG3,TNFSF15,CCNJL,DUSP7,DUSP8,DUSP9,RGS3,EPHA4…
GO: Biological Process	GO:0099645	neurotransmitter receptor localization to postsynaptic specialization membrane		3.001E-5	2.868E-1	1.054E-3	1.027E-2	12	34	GIT1,LGI1,CNIH3,MAGI2,DLG2,GPC6,CACNG3,GPC4,CACNG5,IQSEC2,RAPGEF4,HRAS
GO: Biological Process	GO:0099633	protein localization to postsynaptic specialization membrane		3.001E-5	2.868E-1	1.054E-3	1.027E-2	12	34	GIT1,LGI1,CNIH3,MAGI2,DLG2,GPC6,CACNG3,GPC4,CACNG5,IQSEC2,RAPGEF4,HRAS
GO: Biological Process	GO:1901701	cellular response to oxygen-containing compound		3.143E-5	3.003E-1	1.100E-3	1.072E-2	163	1301	MAP1B,ADCY9,MAP3K5,FZD7,GRAMD1B,PARP1,ARID1B,AKT1,FOXO4,IRS4,PIK3R3,APP,PHPT1,PDE8B,ASS1,ATP1A3,NPAS4,PRDM1,BMP7,BPI,NFE2L2,KLF9,NFKBIB,VWA2,CACNA1A,CACNA1D,CACNA1E,ATP6V0E1,NTRK2,BRSK2,NR4A2,CXCL16,OPRD1,OXCT1,NEURL1,PRKN,HTR3B,CDH1,CDK16,PDE1C,PDE2A,PDE4D,PDGFRB,ENPP1,PENK,GPR37L1,CHRM3,SGMS1,SSH1,PLA2G1B,AKAP6,COL4A1,COL16A1,BCAR1,CSK,PRKAR1A,PRKCB,PRKCE,RAPGEF2,MAP2K6,CX3CR1,DAB2IP,ZBTB20,PTA…
GO: Biological Process	GO:0018212	peptidyl-tyrosine modification		3.193E-5	3.051E-1	1.114E-3	1.085E-2	65	423	ACVR1,ADORA1,APP,PLPP3,RAP2C,TNK1,NRP2,NF2,NTRK2,ROR1,OSM,NEURL1,CD40,CD81,CRLF1,PDGFRB,ENPP2,CLK3,DSTYK,CNTN1,NRG2,AATK,CSK,CSPG4,PRKCE,MAP2K5,MAP2K6,TRAF3IP1,MELK,PTK7,PTPN1,PTPRZ1,DLG3,HBEGF,TNK2,EPHA4,EPHA8,EPHB1,EPHB2,EPHB3,EPHB6,FGF8,FGFR1,FGFR3,FGFR2,PIBF1,SFRP1,CAMKK2,FYN,SRMS,GDNF,GFRA1,SYK,TCF3,SRCIN1,TTL,HK1,TTN,TXK,HTR2A,IGF1R,IL12RB1,INSR,ITGA5,KIT
GO: Biological Process	GO:0098739	import across plasma membrane		3.216E-5	3.073E-1	1.117E-3	1.089E-2	28	134	AKT1,KCNK5,ATP1A1,ATP1A3,SLC11A2,CNGA3,SLC31A1,SLC39A4,SLC1A2,SLC1A3,SLC1A5,SLC2A5,SLC7A1,SLC8A2,SLC8A1,SLC8A3,FYN,FAM155B,SLC9A9,SLC12A8,SLC9C1,ACSL6,SLC7A3,FAM155A,KCND3,KCNH2,KCNJ6,WNK2
GO: Biological Process	GO:0043549	regulation of kinase activity		3.265E-5	3.120E-1	1.130E-3	1.101E-2	128	978	ADCY9,MAP3K4,AXIN2,MAP3K5,ADORA1,ADORA2A,HEG1,AKT1,TRIB2,PIK3R3,DGKE,APP,ARAF,MADD,TNFSF11,RAP2C,TNFRSF11A,TNFRSF10B,KSR1,BMP7,NF2,CDK5R2,NTRK2,MAP3K6,NEURL1,CD40,DGKI,PRKN,CD81,MAP3K13,CDC25C,PAQR3,CDKN1C,PDGFRB,ENPP1,CARD10,PFKFB1,DSTYK,PLA2G1B,IQGAP3,CARD14,AKAP6,MAGED1,PPP2R5C,CSK,CSPG4,PRKAG1,PRKAR1A,RAPGEF2,MAP2K5,MAP2K6,PROX1,DAB2IP,RASSF2,DAB1,DGKG,ZEB2,PTPN1,RASIP1,DLG3,TNFSF15,CCNJL,DUS…
GO: Biological Process	GO:0021700	developmental maturation		3.335E-5	3.186E-1	1.149E-3	1.119E-2	54	333	MAP1B,ACVRL1,AKT1,ANK3,APP,ARCN1,SCARF1,SPTBN4,ADGRB3,NEUROD2,AP1M1,CDK5R2,CACNA1A,NPR2,CAMK2B,NR4A2,RUNX2,NEURL1,MAP3K13,CDKN1C,B4GALT5,CATSPERZ,NRG2,CSPG4,FEV,CX3CR1,DAB2IP,FARP2,DLG2,FAT4,EPHA8,IRX5,LRRK2,ZBTB7A,MBTPS2,FGFR1,FGFR3,SHB,ADGRL1,CLSTN1,SIRT2,SOX10,DISC1,NFASC,C1QL1,XYLT1,ANKS1A,TCP11,GRIP2,IGSF21,SEZ6L,CATSPERD,RBPJ,KCNMA1
GO: Biological Process	GO:0008016	regulation of heart contraction		3.342E-5	3.193E-1	1.149E-3	1.119E-2	47	277	ADA,ADORA1,ANK2,SPTBN4,ATP1A1,ATP1A3,MYL4,CACNA1G,CACNA1C,CACNA1D,CACNA1E,CACNA1S,NPR1,NPR2,CACNG1,CASQ1,PDE4D,CACNA2D2,AKAP6,DMPK,DSG2,HBEGF,ACE2,IRX5,KCNIP3,KCNIP1,CACNG3,SCN5A,FGF13,SLC8A2,SLC8A1,SLC8A3,CORIN,CACNG5,SREBF1,NMU,GNAI3,FOXN4,THRA,ITPR1,ITPR2,ITPR3,KCNA5,KCND3,KCNH2,KCNQ1,SMAD7
GO: Biological Process	GO:0098880	maintenance of postsynaptic specialization structure		3.450E-5	3.296E-1	1.174E-3	1.144E-2	8	16	GIT1,DLGAP1,MAGI2,DLG2,DLG3,SHANK2,CADM1,SHANK3
GO: Biological Process	GO:0090128	regulation of synapse maturation		3.450E-5	3.296E-1	1.174E-3	1.144E-2	8	16	NEUROD2,CAMK2B,NEURL1,NRG2,DAB2IP,ADGRL1,CLSTN1,DISC1
GO: Biological Process	GO:0060348	bone development		3.452E-5	3.298E-1	1.174E-3	1.144E-2	43	246	MATN3,MEIS1,AXIN2,MMP14,MSX1,TNFSF11,BGN,BMPR1B,VWA2,NOTCH2,NPR2,RUNX2,CHAD,PIP4K2A,TJP2,COL9A1,COL13A1,IFT172,FAT4,MEGF8,ZFPM1,MBTPS2,FGF8,FGFR3,FGFR2,TRIM45,FOXP1,SPARC,XYLT1,SULF2,GLG1,NBEAL2,TBXT,GNAS,TMEM119,SIK3,AKAP13,TTC9,CADM1,CYP26B1,VWA1,KIT,LRP5
GO: Biological Process	GO:1905475	regulation of protein localization to membrane		3.499E-5	3.343E-1	1.186E-3	1.155E-2	40	223	FZD9,AKT1,MMP14,ANK3,LRRC15,NMT1,CAMK2B,PRKN,CD81,PDZK1,SSH1,PMAIP1,NECAB2,CSK,PRKCE,PRKCH,MAGI2,DPP6,GPC6,EPHB2,GPC4,GPC5,RAB11FIP2,FYN,IQSEC2,ARHGEF16,GPC3,MTCL1,RAPGEF4,TFDP1,GRIP2,HPCA,HRAS,EZR,YWHAG,SHANK3,NKD2,KCNB1,LRP1,LRP5
GO: Biological Process	GO:0015015	heparan sulfate proteoglycan biosynthetic process, enzymatic modification		3.743E-5	3.577E-1	1.264E-3	1.231E-2	5	6	HS6ST2,HS6ST3,HS6ST1,HS2ST1,HS3ST3B1
GO: Biological Process	GO:0021885	forebrain cell migration		3.793E-5	3.625E-1	1.276E-3	1.243E-2	19	75	MDGA1,NRP2,CDK5R2,SUN2,CX3CR1,DAB2IP,DAB1,FEZF2,LRRK2,FGF13,FGFR1,SLIT1,SLIT3,DISC1,SYNE2,SUN1,TNR,BMERB1,LAMB1
GO: Biological Process	GO:0051899	membrane depolarization		3.882E-5	3.709E-1	1.298E-3	1.265E-2	23	101	FZD9,ADORA2A,PARP1,ABCD1,ANK2,ANK3,CACNA1I,CACNA1G,CACNA1A,CACNA1C,CACNA1D,CACNA1E,PDE4D,LRRK2,SCN4A,SCN5A,SCN8A,FGF12,SLC8A1,GOT1,PARK7,KCNH2,SMAD7
GO: Biological Process	GO:0019722	calcium-mediated signaling		3.886E-5	3.713E-1	1.298E-3	1.265E-2	44	255	ADA,TENM2,TPCN1,ANK2,TNFSF11,ADGRB2,NEUROD2,NFATC2,CACNA1C,CACNA1D,NTRK2,KSR2,CASQ1,CDH13,PDE4D,PLCG1,CMKLR1,PLCG2,MCOLN2,AKAP6,EGLN1,CX3CR1,DMPK,RCAN2,LRRK2,CCL3,RASA3,PPP1R9A,ADGRL1,SLC8A1,CAMKK2,NR5A1,JPH4,SYK,CAMTA1,GRIN2C,RCAN3,HPCA,ITPR1,ITPR2,ITPR3,C10orf71,JPH2,JPH3
GO: Biological Process	GO:2000145	regulation of cell motility		3.923E-5	3.749E-1	1.306E-3	1.272E-2	143	1120	MCAM,ACVR1,ACVRL1,ADA,ADORA1,MTUS1,AKT1,FOXO4,SEMA6A,MMP14,PIK3R3,EPB41L5,AIRE,APOD,APP,SEMA4G,ARHGAP4,MAPK15,PHPT1,PLPP3,RAP2C,LRRC15,MYLK,NEXMIF,ADGRB1,BBS1,NRP2,BMP7,NF2,NFE2L2,LDLRAD4,CAMK2B,SEMA5A,CXCL16,CD9,CD40,CD81,CD151,CDH1,CDH13,PDGFRB,ENPP2,CARD10,SSH1,SEMA5B,SUN2,PLCG1,CMKLR1,PLXNA1,ONECUT2,DLL4,PODXL,MMP28,NRG2,DUOX2,BCAR1,ADGRA2,NUS1,PRKCE,CTNNA2,RAPGEF2,MAP2K5,CX3CR1,PROX1,DAB2IP,…
GO: Biological Process	GO:0050708	regulation of protein secretion		3.944E-5	3.769E-1	1.309E-3	1.275E-2	79	545	MBP,ADORA2A,PARP1,SCAMP5,SLC25A5,MADD,PHPT1,PDE8B,MYH10,CACNA1A,CACNA1C,CACNA1D,CACNA1E,BRSK2,SYT7,OSM,OXCT1,CD40,PRKN,CDK16,PDE1C,CACNA2D2,PLA2G1B,PRKCE,RAB11FIP3,SSC5D,TNFSF15,DPP4,SIDT2,LRRK2,LGR4,FBLN1,CCL1,CCL3,SFRP1,ATG7,OTUD5,UQCC2,RAB11FIP1,FRMD4A,ANKRD1,FOXP1,CD276,SREBF1,ARFIP1,NMU,ABCC8,SYK,GPLD1,TCF7L2,CARMIL2,FFAR2,RAPGEF4,SRCIN1,TMBIM6,ATP13A2,SIRT4,TIAM1,HK1,HMGB1,TTN,CADM1,NR1H2,E…
GO: Biological Process	GO:0071320	cellular response to cAMP		3.973E-5	3.796E-1	1.314E-3	1.280E-2	16	57	APP,ASS1,PDE2A,PENK,AKAP6,RAPGEF2,PTAFR,SLC5A5,SLC8A1,SLC8A3,RAPGEF1,EZR,ITPR1,ITPR2,ITPR3,KCNQ1
GO: Biological Process	GO:0001837	epithelial to mesenchymal transition		3.996E-5	3.819E-1	1.317E-3	1.283E-2	31	157	ACVR1,ACVRL1,AXIN2,EPB41L5,MSX1,DACT3,BMP7,LDLRAD4,DAB2IP,GSC,TRIM62,LEF1,ERG,FGF8,FGFR2,ZNF703,SFRP1,KBTBD8,PBLD,CLASP2,PDCD4,TBX5,TCF7L2,AKNA,TIAM1,WNT11,RBPJ,CRB2,HMGA2,SMAD3,SMAD7
GO: Biological Process	GO:0035249	synaptic transmission, glutamatergic		4.067E-5	3.886E-1	1.332E-3	1.298E-2	24	108	ADORA1,ADORA2A,TSHZ3,NAPA,CACNA1A,NTRK2,OXTR,DGKI,PRKN,CNIH3,LRRK2,CACNG3,SHANK2,CACNG5,DISC1,IQSEC2,GRID2,GRIK3,GRIK4,GRM4,TNR,HTR2A,SHANK3,SLC17A6
GO: Biological Process	GO:0001558	regulation of cell growth		4.071E-5	3.890E-1	1.332E-3	1.298E-2	73	494	MAP1B,ACVRL1,RNF157,AKT1,SEMA6A,MMP14,PI16,APBB2,CPNE5,SEMA4G,MSX1,ARHGAP4,DACT3,TNK1,NF2,BRAT1,NPR1,SEMA5A,CXCL16,SYT2,PRKN,CD81,MAP3K13,LGI1,ENPP1,SEMA5B,AKAP6,BCAR1,AATK,PPT1,ITSN2,MAP2K5,DAB2IP,PTPRS,HBEGF,SGK2,MEGF8,LEF1,RPS6KA1,CDKL3,MEG3,ACSL4,FBP1,FGF13,SEMA6C,SEMA3F,SEMA4F,SEMA3C,SFRP1,SIPA1,CLSTN1,SLIT1,SLIT3,SMARCA2,SMARCA4,FOXP1,SPOCK1,DISC1,FSTL4,CLASP2,KDM2B,HDGFL2,TTL,TNR,MGLL,SH3B…
GO: Biological Process	GO:0040017	positive regulation of locomotion		4.184E-5	3.998E-1	1.358E-3	1.323E-2	94	677	MCAM,ACVR1,AKT1,FOXO4,SEMA6A,MMP14,PIK3R3,EPB41L5,APP,SEMA4G,PHPT1,PLPP3,LRRC15,MYLK,NRP2,BMP7,NFE2L2,SEMA5A,CXCL16,CD40,CD151,CDH13,PDGFRB,ENPP2,SSH1,SEMA5B,SUN2,PLCG1,CMKLR1,ONECUT2,PODXL,DUOX2,BCAR1,ADGRA2,CHMP2B,NUS1,PRKCE,RAPGEF2,PROX1,DAB2IP,PTAFR,PTPRZ1,HBEGF,VPS37B,MEGF8,FBXO31,LGR6,CFAP69,LEF1,SMIM22,FBLN1,ATP8A1,FGF1,CCL1,CCL3,FGFR1,SEMA6C,SEMA3F,SEMA4F,ZNF703,SEMA3C,RRAS2,PRR5,HDAC7,SL…
GO: Biological Process	GO:0060292	long-term synaptic depression		4.184E-5	3.999E-1	1.358E-3	1.323E-2	12	35	ADORA1,SORCS2,DGKI,PPP1R9A,SHANK2,SORCS3,IQSEC2,GRID2,MGLL,SHANK3,GRID2IP,KCNB1
GO: Biological Process	GO:0030516	regulation of axon extension		4.192E-5	4.006E-1	1.358E-3	1.323E-2	25	115	MAP1B,SEMA6A,SEMA4G,ARHGAP4,SEMA5A,MAP3K13,SEMA5B,AATK,PTPRS,MEGF8,CDKL3,SEMA6C,SEMA3F,SEMA4F,SEMA3C,SLIT1,DISC1,FSTL4,CLASP2,TTL,TNR,MGLL,WNT3,SEMA3G,LRP1
GO: Biological Process	GO:0030335	positive regulation of cell migration		4.585E-5	4.381E-1	1.480E-3	1.442E-2	87	617	MCAM,ACVR1,AKT1,FOXO4,SEMA6A,MMP14,PIK3R3,EPB41L5,APP,SEMA4G,PLPP3,LRRC15,MYLK,NRP2,BMP7,NFE2L2,SEMA5A,CXCL16,CD40,CD151,CDH13,PDGFRB,ENPP2,SSH1,SEMA5B,SUN2,PLCG1,CMKLR1,ONECUT2,PODXL,BCAR1,ADGRA2,NUS1,PRKCE,RAPGEF2,PROX1,DAB2IP,PTAFR,PTPRZ1,HBEGF,FBXO31,LGR6,LEF1,SMIM22,FBLN1,ATP8A1,FGF1,CCL1,CCL3,FGFR1,SEMA6C,SEMA3F,SEMA4F,ZNF703,SEMA3C,RRAS2,PRR5,HDAC7,SLC8A1,FOXP1,GAB1,ZNF609,SPARC,AGO2,CLASP…
GO: Biological Process	GO:0046903	secretion		4.697E-5	4.488E-1	1.511E-3	1.472E-2	218	1835	MBP,ADA,ADORA1,ADORA2A,PARP1,SCAMP5,MICAL3,VPS18,ANK1,GIT1,SLC25A5,PPFIA4,APBA1,APBA2,PPFIA3,APP,MADD,TNFSF11,PHPT1,PDE8B,NCOA1,RAP2C,MTX1,ABCC3,MYH10,NAPA,TNFRSF11A,BPI,AP1M1,CACNA1I,CACNA1G,CDK5R2,NOTCH2,NPHS1,CACNA1A,CACNA1C,CACNA1D,CACNA1E,NPR1,NSF,NTRK2,BRSK2,SYT2,SYT7,OSM,OXCT1,OXTR,CD9,NEURL1,CD40,DGKI,PRKN,CDK16,PDE1C,CACNA2D2,CHRM3,NRXN3,NRXN2,OTOF,PKP1,PLA2G1B,PLCG1,MCOLN2,SEPTIN5,SELEN…
GO: Biological Process	GO:0018108	peptidyl-tyrosine phosphorylation		4.736E-5	4.525E-1	1.519E-3	1.479E-2	64	420	ACVR1,ADORA1,APP,PLPP3,RAP2C,TNK1,NRP2,NF2,NTRK2,ROR1,OSM,NEURL1,CD40,CD81,CRLF1,PDGFRB,ENPP2,CLK3,DSTYK,CNTN1,NRG2,AATK,CSK,CSPG4,PRKCE,MAP2K5,MAP2K6,TRAF3IP1,MELK,PTK7,PTPN1,PTPRZ1,DLG3,HBEGF,TNK2,EPHA4,EPHA8,EPHB1,EPHB2,EPHB3,EPHB6,FGF8,FGFR1,FGFR3,FGFR2,PIBF1,SFRP1,CAMKK2,FYN,SRMS,GDNF,GFRA1,SYK,TCF3,SRCIN1,HK1,TTN,TXK,HTR2A,IGF1R,IL12RB1,INSR,ITGA5,KIT
GO: Biological Process	GO:0006814	sodium ion transport		4.805E-5	4.592E-1	1.536E-3	1.496E-2	46	273	SLC24A3,TPCN1,SLC24A4,AKT1,ANK3,SLC6A16,SPTBN4,ATP1A1,ATP1A3,SLC4A4,SLC28A1,CNTN1,PRKCE,DMPK,PCSK9,SGK2,SCN4A,SCN5A,SCN8A,FGF12,FGF13,SLC1A2,SLC1A3,SLC5A5,SLC6A1,SLC6A8,SLC6A9,SLC6A11,SLC8A2,SLC8A1,SLC8A3,CNKSR3,SLC9A9,SIK1,SLC28A3,SLC9C1,GNAS,GPLD1,GRIK3,GRIK4,TMPRSS3,UTRN,SLC6A17,SLC38A1,WNK2,SLC17A6
GO: Biological Process	GO:0050885	neuromuscular process controlling balance		4.864E-5	4.648E-1	1.549E-3	1.509E-2	18	70	APP,PDE8B,MYH10,AP1S2,CACNA1A,CAMK2B,IGDCC3,RBFOX1,SLC1A3,JPH4,NKX6-2,CDH23,CAMTA1,GRIN2C,TNR,SHANK3,KCNMA1,JPH3
GO: Biological Process	GO:0008347	glial cell migration		5.008E-5	4.786E-1	1.590E-3	1.549E-2	17	64	MMP14,CDK5R2,SUN2,CSPG4,CX3CR1,DAB2IP,DAB1,PTPRZ1,EPHA4,CCL3,DISC1,SYNE2,SUN1,TIAM1,BMERB1,LAMB1,LRP1
GO: Biological Process	GO:0001525	angiogenesis		5.047E-5	4.823E-1	1.597E-3	1.556E-2	90	645	MCAM,ACVR1,ACVRL1,MEIS1,AKT1,FOXO4,SEMA6A,MMP14,PIK3R3,APOD,ADGRB1,ADGRB2,ADGRB3,NRP2,NFE2L2,NOTCH2,NOTCH4,NPR1,SEMA5A,FMNL3,CD40,CDH13,PDGFRB,ENPP2,CARD10,ARHGAP22,NRXN3,HS6ST1,PLCG1,COL4A1,COL8A1,COL8A2,TBX4,COL15A1,DLL4,EGLN1,ADGRA2,NUS1,CSPG4,PRKCB,MAP2K5,CX3CR1,DAB2IP,ARHGAP24,RASIP1,PTPRM,HBEGF,EFNB2,KCTD10,CELA1,LEF1,EPHB1,EPHB2,EPHB3,LRG1,FGF1,FGF8,FGFR1,FGFR2,SFRP1,STAB2,SHB,HDAC7,NOX1,G…
GO: Biological Process	GO:0035725	sodium ion transmembrane transport		5.136E-5	4.908E-1	1.618E-3	1.576E-2	39	219	SLC24A3,TPCN1,SLC24A4,ANK3,SLC6A16,ATP1A1,ATP1A3,SLC4A4,SLC28A1,PRKCE,PCSK9,SGK2,SCN4A,SCN5A,SCN8A,FGF12,FGF13,SLC1A2,SLC1A3,SLC5A5,SLC6A1,SLC6A8,SLC6A9,SLC6A11,SLC8A2,SLC8A1,SLC8A3,CNKSR3,SLC9A9,SLC28A3,SLC9C1,GPLD1,GRIK3,GRIK4,TMPRSS3,UTRN,SLC6A17,SLC38A1,WNK2
GO: Biological Process	GO:0071526	semaphorin-plexin signaling pathway		5.162E-5	4.933E-1	1.618E-3	1.576E-2	13	41	SEMA6A,SEMA4G,NRP2,SEMA5A,SEMA5B,PLXNA1,FARP2,SEMA6C,SEMA3F,SEMA4F,SEMA3C,GDNF,SEMA3G
GO: Biological Process	GO:0046777	protein autophosphorylation		5.180E-5	4.950E-1	1.618E-3	1.576E-2	44	258	AKT1,MAPK15,RAP2C,TNK1,MYO3A,CAMK2B,NTRK2,MAP3K13,PDGFRB,ENPP1,CLK3,PPP2R5C,AATK,CSK,RASSF2,MELK,GRK1,TNK2,EPHA4,EPHA8,EPHB1,EPHB3,LRRK2,OBSCN,TAOK3,FGFR1,FGFR3,FGFR2,CAMKK2,FYN,STK26,SRMS,SIK1,SYK,ATP13A2,MAP4K1,HK1,TXK,IGF1R,TNKS1BP1,PINK1,INSR,KIT,WNK2
GO: Biological Process	GO:0007498	mesoderm development		5.180E-5	4.950E-1	1.618E-3	1.576E-2	44	258	MBP,ACVR1,FZD7,MMP14,MMP15,EPB41L5,PLPP3,BMP7,NF2,COL8A1,COL11A1,IRX3,CELSR1,PRKAR1A,MAP2K5,TCF7L1,SOX7,GSC,MEGF8,ELF5,LEF1,EXT1,EYA2,SALL1,FGF8,FGFR1,FGFR2,SFRP1,CLASP2,GPC3,TBXT,TBX3,TCF3,TEAD1,WNT3,WNT8B,WNT11,CRB2,ITGA5,ITGB4,LAMB1,HMGA2,LRP5,SMAD3
GO: Biological Process	GO:0000187	activation of MAPK activity		5.297E-5	5.062E-1	1.649E-3	1.606E-2	37	204	MAP3K4,MAP3K5,ADORA1,ARAF,MADD,TNFSF11,MAP3K6,CD81,MAP3K13,PLA2G1B,IQGAP3,CSPG4,MAP2K5,MAP2K6,DAB2IP,PTPN1,DUSP7,DUSP9,EPHB2,LRRK2,TAOK3,NOD1,FGF1,TAB1,GAB1,MAP3K20,MAPK8IP3,FGD4,SYK,RAPGEF1,GRM4,MAP4K1,WNT7B,IGF1R,INSR,KARS1,KIT
GO: Biological Process	GO:0051965	positive regulation of synapse assembly		5.612E-5	5.363E-1	1.741E-3	1.696E-2	19	77	ADGRB1,ADGRB2,ADGRB3,NTRK2,OXTR,EPHB1,EPHB2,EPHB3,ADGRL1,CLSTN1,CLSTN2,SLITRK2,VSTM5,ADGRL3,CUX2,GRID2,THBS2,FLRT3,IL1RAP
GO: Biological Process	GO:0010817	regulation of hormone levels		5.723E-5	5.469E-1	1.770E-3	1.724E-2	86	612	ADORA1,SLC25A5,MADD,TNFSF11,PHPT1,PDE8B,ATP1A1,BBS1,BMPR1B,CYP26C1,CACNA1A,CACNA1C,CACNA1D,CACNA1E,BRSK2,SYT7,OSM,OXCT1,PRKN,CDK16,PDE1C,CACNA2D2,CLCN2,SELENOM,DUOX2,CRYM,PRKCE,RAB11FIP3,KLK6,CHST9,PTPRN2,DHCR7,DIO3,DPP4,ECE1,ACE2,SIDT2,ATP6AP2,DHRS2,HSD17B14,FGFR1,SFRP1,ATG7,ITSN1,RAB11FIP2,UQCC2,RAB11FIP1,SLC5A5,CORIN,NR5A1,ILDR2,SREBF1,NMU,GHRH,DGAT2,ABCC8,STARD3,GNAS,GPLD1,TBX3,TCF7L2,FFAR2,R…
GO: Biological Process	GO:1902667	regulation of axon guidance		5.829E-5	5.570E-1	1.797E-3	1.751E-2	14	47	SEMA6A,SEMA4G,SEMA5A,SEMA5B,PTPRO,FEZF2,MEGF8,SEMA6C,SEMA3F,SEMA4F,SEMA3C,SLIT1,WNT3,SEMA3G
GO: Biological Process	GO:0071900	regulation of protein serine/threonine kinase activity		5.865E-5	5.604E-1	1.802E-3	1.756E-2	80	560	MAP3K4,MAP3K5,ADORA1,HEG1,AKT1,TRIB2,ARAF,MADD,TNFSF11,TNFRSF11A,KSR1,BMP7,CDK5R2,MAP3K6,CD40,CD81,MAP3K13,CDC25C,PAQR3,CDKN1C,PDGFRB,PLA2G1B,IQGAP3,AKAP6,MAGED1,CSK,CSPG4,PRKAG1,PRKAR1A,RAPGEF2,MAP2K5,MAP2K6,PROX1,DAB2IP,ZEB2,PTPN1,RASIP1,CCNJL,DUSP7,DUSP8,DUSP9,RGS3,EPHA4,EPHB2,LRRK2,SPRED3,TAOK3,NOD1,FGF1,FGFR1,TAB1,PRKAG2,SFRP1,RGS14,GAB1,SORL1,MAP3K20,PDCD4,MAPK8IP3,FGD4,SYK,RAPGEF1,TEAD1,GR…
GO: Biological Process	GO:0016322	neuron remodeling		5.987E-5	5.721E-1	1.823E-3	1.776E-2	8	17	APP,SCARF1,ADGRB3,CSPG4,FARP2,EPHA8,C1QL1,ANKS1A
GO: Biological Process	GO:1900452	regulation of long-term synaptic depression		5.987E-5	5.721E-1	1.823E-3	1.776E-2	8	17	ADORA1,DGKI,PPP1R9A,SORCS3,IQSEC2,GRID2,SHANK3,KCNB1
GO: Biological Process	GO:0099504	synaptic vesicle cycle		5.991E-5	5.725E-1	1.823E-3	1.776E-2	41	236	ACTG1,BTBD9,ADORA2A,SCAMP5,VPS18,GIT1,APBA1,APBA2,PPFIA3,AP3B1,NAPA,AP1S2,BSN,CACNA1A,CACNA1D,BRSK2,SYT2,SYT7,DGKI,NRXN3,OTOF,SEPTIN5,DNM3,ERC2,PRKCB,PRKCE,CTBP2,SNPH,GIT2,MAGI2,STX2,LRRK2,ITSN1,SH3GL3,SYN2,RAPGEF4,GRM4,PIP5K1C,HTR2A,KCNH1,SLC17A6
GO: Biological Process	GO:0060074	synapse maturation		6.083E-5	5.813E-1	1.845E-3	1.798E-2	11	31	NEUROD2,CAMK2B,NEURL1,NRG2,CX3CR1,DAB2IP,ADGRL1,CLSTN1,DISC1,IGSF21,SEZ6L
GO: Biological Process	GO:0060428	lung epithelium development		6.194E-5	5.919E-1	1.873E-3	1.825E-2	15	53	NFIB,NUMA1,SPDEF,NCOR2,FOXP4,FGFR3,FGFR2,SRSF6,FOXP1,THRA,FNDC3B,WNT7B,RBPJ,HMGA2,RCN3
GO: Biological Process	GO:1903539	protein localization to postsynaptic membrane		6.300E-5	6.021E-1	1.899E-3	1.850E-2	16	59	GIT1,LGI1,CNIH3,MAGI2,DLG2,GPC6,CACNG3,GPC4,CLSTN1,CACNG5,IQSEC2,RAPGEF4,GRIN2C,GRIP1,GRIP2,HRAS
GO: Biological Process	GO:0002790	peptide secretion		6.332E-5	6.051E-1	1.899E-3	1.850E-2	99	729	MBP,ADORA1,ADORA2A,PARP1,SCAMP5,SLC25A5,MADD,TNFSF11,PHPT1,PDE8B,MYH10,NOTCH2,CACNA1A,CACNA1C,CACNA1D,CACNA1E,BRSK2,SYT7,OSM,OXCT1,CD40,PRKN,CDK16,PDE1C,CACNA2D2,PLA2G1B,PLCG1,MCOLN2,PRKCE,RAB11FIP3,SSC5D,PTPRN2,ARFGAP3,TNFSF15,DPP4,TVP23B,SIDT2,EPHB6,LRRK2,LGR4,FBLN1,CCL1,CCL3,SFRP1,ATG7,OTUD5,ITSN1,RAB11FIP2,UQCC2,MON1A,RAB11FIP1,FRMD4A,ANKRD1,FOXP1,CD276,ILDR2,SREBF1,ARFIP1,NMU,GHRH,ABCC8,SYK,…
GO: Biological Process	GO:0045666	positive regulation of neuron differentiation		6.339E-5	6.058E-1	1.899E-3	1.850E-2	70	475	MAP1B,MAP6,RNF157,ENC1,CPNE5,SCARF1,NCOA1,BMP7,NEUROD2,NFE2L2,CAMK2B,NTRK2,SEMA5A,SYT2,NEURL1,PRKN,MAP3K13,PLXNA1,CNTN1,IRX3,RGS6,ITSN2,KDM4A,RAPGEF2,CUX1,PROX1,DAB2IP,DAB1,ZEB2,PTK7,MAGI2,PTPRZ1,FEZF2,LIN28A,MEGF8,FBXO31,EPHA4,CDKL3,ETV5,SALL1,FGFR1,BAIAP2,ITSN1,PPP1R9A,SH3GL3,TRAK1,SHANK2,TENM3,ANKRD1,FYN,DISC1,MAPK8IP3,GLI2,ACSL6,TCF4,TCF3,CUX2,RAPGEF1,GRIP1,TIAM1,GRIP2,WNT3,SHANK3,IGF1R,IL1RA…
GO: Biological Process	GO:0001508	action potential		6.711E-5	6.414E-1	1.998E-3	1.946E-2	35	191	ANK2,ANK3,SPTBN4,ATP1A1,CACNA1I,CACNA1G,CACNA1A,CACNA1C,CACNA1D,CACNA1E,NTRK2,PDE4D,AKAP6,DPP6,DSG2,MYH14,KCNIP1,CACNG3,SCN4A,SCN5A,SCN8A,FGF12,FGF13,SLC8A1,FOXP1,CACNG5,NFASC,RAPGEF4,TNR,KCNA5,KCNB1,KCND3,KCNH2,KCNMA1,KCNQ1
GO: Biological Process	GO:1905330	regulation of morphogenesis of an epithelium		6.711E-5	6.414E-1	1.998E-3	1.946E-2	35	191	FZD7,PLEKHA4,CITED1,GRHL3,BMP7,ROR1,CDH1,ARHGEF19,MAGED1,CELSR1,PSMA6,PSMB6,PSMB7,PTK7,MAGI2,GPC6,LGR4,ETV5,SALL1,ZNRF3,GPC4,FGF1,FGFR1,SFRP1,ANKRD6,PRICKLE2,FOXP1,CLASP2,GDNF,STAT1,AJAP1,GPC3,TIAM1,WNT7B,WNT11
GO: Biological Process	GO:0051272	positive regulation of cellular component movement		6.812E-5	6.510E-1	2.016E-3	1.964E-2	92	668	MCAM,ACVR1,AKT1,FOXO4,SEMA6A,MMP14,PIK3R3,EPB41L5,APP,SEMA4G,PHPT1,PLPP3,LRRC15,MYLK,NRP2,BMP7,NFE2L2,SEMA5A,CXCL16,CD40,CD151,CDH13,PDGFRB,ENPP2,SSH1,SEMA5B,SUN2,PLCG1,CMKLR1,ONECUT2,PODXL,DUOX2,BCAR1,ADGRA2,NUS1,PRKCE,RAPGEF2,PROX1,DAB2IP,PTAFR,PTPRZ1,HBEGF,MEGF8,FBXO31,LGR6,CFAP69,LEF1,SMIM22,FBLN1,ATP8A1,FGF1,CCL1,CCL3,FGFR1,SEMA6C,SEMA3F,SEMA4F,ZNF703,SEMA3C,RRAS2,PRR5,HDAC7,SLC8A1,FOXP1,PRD…
GO: Biological Process	GO:0008015	blood circulation		6.816E-5	6.513E-1	2.016E-3	1.964E-2	86	615	ACVRL1,ADA,ADORA1,ADORA2A,AKT1,ANK2,SPTBN4,ATP1A1,ATP1A3,MYL4,NFE2,CACNA1G,CACNA1C,CACNA1D,CACNA1E,CACNA1S,NPR1,NPR2,CACNG1,CASQ1,OXTR,PDE2A,PDE4D,CACNA2D2,GPR37L1,CHRM3,PLCB3,AKAP6,DLL4,PON1,MAP2K6,PTAFR,PTPRM,PTPRO,CYB5R3,DMPK,DSG2,HBEGF,ECE1,ACE2,ATP6AP2,IRX5,KCNIP3,KCNIP1,CACNG3,SCN5A,FGF12,FGF13,SLC2A5,SLC8A2,SLC8A1,SLC8A3,NOX1,CORIN,CACNG5,SREBF1,STAT1,NMU,GNAI3,GNAS,TBXAS1,FOXN4,NR2F2,THRA…
GO: Biological Process	GO:0043062	extracellular structure organization		7.061E-5	6.747E-1	2.082E-3	2.029E-2	74	511	MATN3,AEBP1,MMP14,MMP15,APBB2,APP,MYO1E,BGN,BMP7,NPHS1,SEMA5A,CDH1,LIPG,CLTA,PLTP,COL4A1,COL8A1,COL8A2,COL9A1,COL9A3,COL11A1,COL13A1,COL15A1,COL16A1,ADAMTS3,ADAMTS2,MMP28,PON1,CSK,SH3PXD2A,ADAMTS14,HTRA1,PCSK9,CRISPLD2,DPP4,PDCD6IP,FBLN1,FBLN2,FBN2,ADAMTS20,SCUBE1,NOX1,SMARCA4,SPARC,MMP27,CLASP2,COL25A1,SMOC2,SULF2,DGAT2,ABCC8,GPLD1,GPM6B,CARMIL2,TLL2,TNR,TNXB,NR1H2,VWA1,ITGA5,ITGA9,ITGAE,ITGB4,A…
GO: Biological Process	GO:0000122	negative regulation of transcription by RNA polymerase II		7.256E-5	6.934E-1	2.129E-3	2.074E-2	121	931	TENM2,MEIS2,SCAF4,PARP1,MTA3,ZNF608,AEBP1,FOXO4,MNT,MSX1,MAPK15,ZBTB10,ZFHX3,PRDM1,NFATC2,NFIB,NFIC,NFIX,NOTCH2,NPAS1,PCBP3,NR4A2,CBFA2T3,PRKN,LRRFIP1,CDKN1C,PDE2A,SPDEF,HJV,PRRX1,TBX4,DLL4,TBX21,HINFP,NCOR2,FOXP4,CRYM,MAP2K5,GLIS1,CUX1,PROX1,DAB2IP,ZNF536,ZBTB20,SCRT1,TRAF3IP1,IFT172,ZEB2,SOX7,PURA,DMRT1,DNMT1,NR2E3,TSC22D3,FEZF2,GLIS3,GSC,KLF16,DNAJC17,CELA1,LEF1,ZFPM1,KCNIP3,ZBTB7A,FBP1,SALL1,…
GO: Biological Process	GO:0030166	proteoglycan biosynthetic process		7.264E-5	6.942E-1	2.129E-3	2.074E-2	18	72	HS6ST2,HS6ST3,BGN,BMPR1B,HS6ST1,CHST11,HS2ST1,CSPG4,CHST9,HS3ST3B1,HS3ST3A1,CHPF,EXT1,XYLT1,TCF7L2,CHST8,NDST1,LIPC
GO: Biological Process	GO:0050796	regulation of insulin secretion		7.289E-5	6.965E-1	2.129E-3	2.074E-2	37	207	SLC25A5,PHPT1,PDE8B,CACNA1A,CACNA1C,CACNA1D,CACNA1E,BRSK2,SYT7,OXCT1,PRKN,CDK16,PDE1C,CACNA2D2,PRKCE,DPP4,SIDT2,SFRP1,ATG7,UQCC2,SREBF1,ABCC8,GPLD1,TCF7L2,RAPGEF4,SIRT4,TIAM1,ICA1,C1QTNF12,ITPR1,ITPR2,ITPR3,KCNA5,KCNB1,KCNQ1,LRP1,LRP5
GO: Biological Process	GO:0048675	axon extension		7.307E-5	6.982E-1	2.129E-3	2.074E-2	28	140	MAP1B,SEMA6A,SEMA4G,ARHGAP4,NRP2,SEMA5A,MAP3K13,SEMA5B,AATK,AUTS2,PTPRS,MEGF8,CDKL3,SEMA6C,SEMA3F,SEMA4F,SEMA3C,SLIT1,SLIT3,DISC1,FSTL4,CLASP2,TTL,TNR,MGLL,WNT3,SEMA3G,LRP1
GO: Biological Process	GO:0030072	peptide hormone secretion		7.442E-5	7.111E-1	2.161E-3	2.106E-2	49	302	SLC25A5,MADD,TNFSF11,PHPT1,PDE8B,CACNA1A,CACNA1C,CACNA1D,CACNA1E,BRSK2,SYT7,OXCT1,PRKN,CDK16,PDE1C,CACNA2D2,PRKCE,PTPRN2,DPP4,SIDT2,SFRP1,ATG7,ITSN1,RAB11FIP2,UQCC2,ILDR2,SREBF1,NMU,GHRH,ABCC8,GPLD1,TCF7L2,FFAR2,RAPGEF4,SIRT4,TIAM1,PARK7,HTR2C,ICA1,C1QTNF12,ITPR1,ITPR2,ITPR3,KCNA5,KCNB1,KCNQ1,HMGA2,LRP1,LRP5
GO: Biological Process	GO:0050805	negative regulation of synaptic transmission		7.463E-5	7.132E-1	2.161E-3	2.106E-2	20	85	ADORA1,SORCS2,DGKI,PRKN,LRRK2,PPP1R9A,SLC6A1,SHANK2,SORCS3,IQSEC2,SYNE1,RAPGEF4,GRID2,GRIK3,TNR,MGLL,HTR2A,SHANK3,GRID2IP,KCNB1
GO: Biological Process	GO:0001654	eye development		7.500E-5	7.167E-1	2.165E-3	2.109E-2	63	418	ACVRL1,MEIS1,MEIS2,GRHL3,MYH10,PRDM1,BMP7,BMPR1B,NF2,NHS,SDK1,NOTCH2,CACNA1C,CACNA1S,NTRK2,CDKN1C,PDE6B,PDGFRB,CLCN2,PITX3,CNGA3,COL4A1,COL8A1,COL8A2,DLL4,CRYBB3,PROX1,IFT140,TRAF3IP1,MFRP,ZEB2,CASZ1,PTPRM,DIO3,NR2E3,GRK1,EPHB1,EPHB2,IRX5,FBN2,FGFR3,FGFR2,ZHX2,ATF6,TENM3,SMARCA4,MEGF11,MIAT,TTLL5,KDM2B,GNAT1,FOXN4,TDRD7,HMGB1,HPCA,USH2A,WNT7B,BCL11B,MDM1,LIMK2,LMX1B,LRP5,SMAD3
GO: Biological Process	GO:0007215	glutamate receptor signaling pathway		7.543E-5	7.208E-1	2.171E-3	2.115E-2	24	112	APP,ATP1A3,SHISA9,NECAB2,CNIH3,DLG2,DLG3,EPHB2,CACNG3,RPH3A,SHANK2,CACNG5,FYN,GRID2,GRIK3,GRIK4,GRIN2C,GRM4,TIAM1,PARK7,SHANK3,PINK1,GRID2IP,KCNB1
GO: Biological Process	GO:0071692	protein localization to extracellular region		7.691E-5	7.350E-1	2.207E-3	2.150E-2	94	688	MBP,ADORA2A,PARP1,SCAMP5,SLC25A5,MADD,PHPT1,PDE8B,MYH10,NOTCH2,CACNA1A,CACNA1C,CACNA1D,CACNA1E,BRSK2,SYT7,OSM,OXCT1,CD40,PRKN,CDK16,PDE1C,CACNA2D2,PLA2G1B,PLCG1,MCOLN2,PRKCE,RAB11FIP3,SSC5D,PTPRN2,ARFGAP3,TNFSF15,DPP4,TVP23B,SIDT2,EPHB6,LRRK2,LGR4,FBLN1,FBN2,CCL1,CCL3,SFRP1,ATG7,OTUD5,RAB11FIP2,UQCC2,MON1A,RAB11FIP1,FRMD4A,ANKRD1,FOXP1,CD276,ILDR2,SREBF1,ARFIP1,NMU,ABCC8,SYK,GPLD1,TCF7L2,CARMIL2,…
GO: Biological Process	GO:0090263	positive regulation of canonical Wnt signaling pathway		7.762E-5	7.418E-1	2.221E-3	2.164E-2	30	155	AXIN2,FZD9,PLEKHA4,TNKS,SEMA5A,ADGRA2,FAM53B,PSMA6,PSMB6,PSMB7,PTK7,EDA,RNF220,LGR6,LRRK2,LGR4,FGFR3,GPC5,FGFR2,SFRP1,DISC1,KANK1,SULF2,GPC3,THRA,NRARP,UBE2B,RBPJ,WNK2,SMAD3
GO: Biological Process	GO:1990778	protein localization to cell periphery		7.819E-5	7.472E-1	2.227E-3	2.170E-2	56	360	AKT1,MMP14,ANK1,ANK2,ANK3,GIT1,SPTBN4,ARL3,SKAP1,LRRC15,BBS1,NSF,CAMK2B,NUMA1,MAP7,CD81,CDH1,LGI1,PDZK1,CSK,PRKCE,PRKCH,RAPGEF2,CNIH3,MAGI2,DLG2,DPP6,GPC6,TSPAN5,EPHB2,KCNIP3,GPR179,EHD2,CACNG3,FCER1G,GPC4,FGF13,RAB11FIP2,CLSTN1,CACNG5,IQSEC2,NFASC,CLASP2,ARHGEF16,RAPGEF4,GRIN2C,GRIP1,PKP3,GRIP2,HRAS,EZR,NKD2,KCNB1,AMN,TTC7A,LRP1
GO: Biological Process	GO:0009914	hormone transport		7.832E-5	7.484E-1	2.227E-3	2.170E-2	59	385	ADORA1,SLC25A5,MADD,TNFSF11,PHPT1,PDE8B,CACNA1A,CACNA1C,CACNA1D,CACNA1E,BRSK2,SYT7,OSM,OXCT1,PRKN,CDK16,PDE1C,CACNA2D2,SELENOM,CRYM,PRKCE,RAB11FIP3,PTPRN2,DPP4,SIDT2,FGFR1,SFRP1,ATG7,ITSN1,RAB11FIP2,UQCC2,RAB11FIP1,ILDR2,SREBF1,NMU,GHRH,ABCC8,GNAS,GPLD1,TBX3,TCF7L2,FFAR2,RAPGEF4,SIRT4,TIAM1,PARK7,HTR2C,ICA1,NIBAN2,C1QTNF12,ITPR1,ITPR2,ITPR3,KCNA5,KCNB1,KCNQ1,HMGA2,LRP1,LRP5
GO: Biological Process	GO:0001755	neural crest cell migration		7.861E-5	7.512E-1	2.229E-3	2.171E-2	16	60	ACVR1,SEMA6A,SEMA4G,NRP2,BMP7,SEMA5A,SEMA5B,ZEB2,SEMA6C,SEMA3F,SEMA4F,SEMA3C,SOX10,GDNF,CORO1C,SEMA3G
GO: Biological Process	GO:0070838	divalent metal ion transport		8.011E-5	7.655E-1	2.258E-3	2.200E-2	77	539	SLC24A3,TPCN1,ADORA2A,SLC24A4,REM1,ANK2,AP3B1,PHPT1,MYLK,SLC39A11,CRACR2B,CACNA1I,CACNA1G,CACNA1A,CACNA1C,CACNA1D,CACNA1E,CACNA1S,CACNG1,SLC11A2,CAMK2B,CASQ1,OPRD1,PDE2A,PDE4D,CACNA2D2,PDGFRB,AHNAK,PLA2G1B,PLCB3,PLCG1,PLCG2,SLC25A23,MCOLN2,AKAP6,SLC39A3,SLC39A2,SLC30A7,PLCH2,PRKCB,PRKCE,MCUB,CACNG3,TRPM3,CCL3,RASA3,SLC39A4,SLC8A2,SLC8A1,SLC8A3,THADA,CACNG5,FYN,FAM155B,JPH4,CDH23,CRACR2A,GRIN2C,ZD…
GO: Biological Process	GO:0060047	heart contraction		8.011E-5	7.656E-1	2.258E-3	2.200E-2	50	311	ADA,ADORA1,ANK2,SPTBN4,ATP1A1,ATP1A3,MYL4,CACNA1G,CACNA1C,CACNA1D,CACNA1E,CACNA1S,NPR1,NPR2,CACNG1,CASQ1,PDE4D,CACNA2D2,AKAP6,MAP2K6,DMPK,DSG2,HBEGF,ACE2,IRX5,KCNIP3,KCNIP1,CACNG3,SCN5A,FGF12,FGF13,SLC8A2,SLC8A1,SLC8A3,CORIN,CACNG5,SREBF1,NMU,GNAI3,FOXN4,THRA,TTN,ITPR1,ITPR2,ITPR3,KCNA5,KCND3,KCNH2,KCNQ1,SMAD7
GO: Biological Process	GO:0009306	protein secretion		8.079E-5	7.720E-1	2.271E-3	2.212E-2	93	680	MBP,ADORA2A,PARP1,SCAMP5,SLC25A5,MADD,PHPT1,PDE8B,MYH10,NOTCH2,CACNA1A,CACNA1C,CACNA1D,CACNA1E,BRSK2,SYT7,OSM,OXCT1,CD40,PRKN,CDK16,PDE1C,CACNA2D2,PLA2G1B,PLCG1,MCOLN2,PRKCE,RAB11FIP3,SSC5D,PTPRN2,ARFGAP3,TNFSF15,DPP4,TVP23B,SIDT2,EPHB6,LRRK2,LGR4,FBLN1,CCL1,CCL3,SFRP1,ATG7,OTUD5,RAB11FIP2,UQCC2,MON1A,RAB11FIP1,FRMD4A,ANKRD1,FOXP1,CD276,ILDR2,SREBF1,ARFIP1,NMU,ABCC8,SYK,GPLD1,TCF7L2,CARMIL2,FFAR2…
GO: Biological Process	GO:0046578	regulation of Ras protein signal transduction		8.192E-5	7.828E-1	2.296E-3	2.237E-2	43	255	MCF2,PLEKHG1,HEG1,ARHGEF37,GIT1,MADD,TNK1,NOTCH2,DGKI,PDGFRB,CYTH2,ARHGEF19,ITSN2,AUTS2,DAB2IP,ARHGAP24,TIAM2,FARP2,RASIP1,IQSEC3,RALGPS2,FARP1,KCTD10,EPHB2,EPS8,OBSCN,DLC1,FBP1,RASA3,ITSN1,ARFGEF2,ARHGEF40,IQSEC2,ARHGEF16,KANK1,FGD4,MAPRE2,ARHGEF28,RAPGEF1,TIAM1,AKAP13,HRAS,SPRY4
GO: Biological Process	GO:0048588	developmental cell growth		8.244E-5	7.878E-1	2.304E-3	2.244E-2	46	279	MAP1B,RNF157,SEMA6A,PI16,APP,CPNE5,SEMA4G,ARHGAP4,TMEM108,NRP2,WASF1,SEMA5A,SYT2,PRKN,MAP3K13,SEMA5B,PLXNA1,AKAP6,AATK,ITSN2,AUTS2,ZEB2,PTPRS,MEGF8,CDKL3,FGF13,SEMA6C,SEMA3F,SEMA4F,SEMA3C,CYFIP2,SLIT1,SLIT3,FOXP1,DISC1,FSTL4,CLASP2,TIAM1,TTL,AKAP13,TNR,MGLL,FLRT3,WNT3,SEMA3G,LRP1
GO: Biological Process	GO:0035592	establishment of protein localization to extracellular region		8.528E-5	8.150E-1	2.376E-3	2.315E-2	93	681	MBP,ADORA2A,PARP1,SCAMP5,SLC25A5,MADD,PHPT1,PDE8B,MYH10,NOTCH2,CACNA1A,CACNA1C,CACNA1D,CACNA1E,BRSK2,SYT7,OSM,OXCT1,CD40,PRKN,CDK16,PDE1C,CACNA2D2,PLA2G1B,PLCG1,MCOLN2,PRKCE,RAB11FIP3,SSC5D,PTPRN2,ARFGAP3,TNFSF15,DPP4,TVP23B,SIDT2,EPHB6,LRRK2,LGR4,FBLN1,CCL1,CCL3,SFRP1,ATG7,OTUD5,RAB11FIP2,UQCC2,MON1A,RAB11FIP1,FRMD4A,ANKRD1,FOXP1,CD276,ILDR2,SREBF1,ARFIP1,NMU,ABCC8,SYK,GPLD1,TCF7L2,CARMIL2,FFAR2…
GO: Biological Process	GO:0046879	hormone secretion		8.658E-5	8.274E-1	2.405E-3	2.343E-2	58	378	ADORA1,SLC25A5,MADD,TNFSF11,PHPT1,PDE8B,CACNA1A,CACNA1C,CACNA1D,CACNA1E,BRSK2,SYT7,OSM,OXCT1,PRKN,CDK16,PDE1C,CACNA2D2,SELENOM,PRKCE,RAB11FIP3,PTPRN2,DPP4,SIDT2,FGFR1,SFRP1,ATG7,ITSN1,RAB11FIP2,UQCC2,RAB11FIP1,ILDR2,SREBF1,NMU,GHRH,ABCC8,GNAS,GPLD1,TBX3,TCF7L2,FFAR2,RAPGEF4,SIRT4,TIAM1,PARK7,HTR2C,ICA1,NIBAN2,C1QTNF12,ITPR1,ITPR2,ITPR3,KCNA5,KCNB1,KCNQ1,HMGA2,LRP1,LRP5
GO: Biological Process	GO:0010812	negative regulation of cell-substrate adhesion		8.817E-5	8.426E-1	2.442E-3	2.379E-2	18	73	ACVRL1,FZD7,MMP14,APOD,NEXMIF,NF2,ENPP2,BCAR1,PTPRO,PTPRZ1,FBLN1,DLC1,SPOCK1,CLASP2,KANK1,AJAP1,CORO1C,LRP1
GO: Biological Process	GO:0035773	insulin secretion involved in cellular response to glucose stimulus		8.890E-5	8.495E-1	2.455E-3	2.392E-2	20	86	PHPT1,PDE8B,CACNA1D,CACNA1E,BRSK2,OXCT1,PRKN,CDK16,PDE1C,PRKCE,PTPRN2,SIDT2,ATG7,RAB11FIP2,GPLD1,TCF7L2,TIAM1,C1QTNF12,LRP1,LRP5
GO: Biological Process	GO:0007264	small GTPase mediated signal transduction		9.308E-5	8.895E-1	2.563E-3	2.497E-2	83	594	RALGAPA1,MCF2,PLEKHG1,HEG1,ARHGEF37,SIPA1L2,ARHGAP21,GIT1,MADD,ARHGAP4,ARL3,RAP2C,TNK1,DOCK11,KSR1,WASF1,NOTCH2,KSR2,DGKI,CDH13,PDGFRB,CYTH2,ARHGAP22,GRAP2,IQGAP3,ARHGEF19,CELSR1,AATK,ITSN2,AUTS2,RAPGEF2,DAB2IP,ARHGAP24,RAPGEF5,DAB1,ELMO1,TIAM2,FARP2,RASIP1,ARHGAP25,DNMT1,RALGDS,IQSEC3,RALGPS2,FARP1,KCTD10,TNK2,RHOT1,EPHB2,EPS8,OBSCN,RSU1,DLC1,FBP1,BAIAP2,RRAS2,MRAS,RASA3,ITSN1,ARFGEF2,SIPA1,RASL…
GO: Biological Process	GO:0050801	ion homeostasis		9.356E-5	8.940E-1	2.569E-3	2.503E-2	118	909	SLC24A3,BTBD9,TPCN1,ADORA1,FZD9,ADORA2A,PARP1,SLC24A4,ABCD1,ANK1,ANK2,ANK3,APP,TNFSF11,ATP1A1,ATP1A3,SLC4A4,CACNA1I,CACNA1G,CACNA1A,CACNA1C,CACNA1D,CACNA1E,NPR1,SLC11A2,ATP6V0E1,CASQ1,OXTR,CD40,PRKN,PDE4D,PDE6B,ENPP1,LIPG,PLA2G1B,PLCB3,PLCG1,CMKLR1,PLCG2,SLC25A23,MCOLN2,AKAP6,HJV,SLC31A1,POLD1,EGLN1,SLC30A7,PPT1,PLCH2,PRKCB,PRKCE,CX3CR1,MTSS1,DMPK,MCUB,LRRK2,SCN5A,CCL1,CCL3,FGF12,CIB2,ATG7,RASA3,…
GO: Biological Process	GO:0032880	regulation of protein localization		9.632E-5	9.204E-1	2.637E-3	2.569E-2	148	1188	ABHD17A,MBP,FZD9,ADORA2A,PARP1,SCAMP5,AKT1,MMP14,USP36,ANK3,SLC25A5,EPB41L5,APOD,MADD,PHPT1,PDE8B,LRRC15,MYH10,NF2,ZPR1,NMT1,NOTCH4,CACNA1A,CACNA1C,CACNA1D,CACNA1E,CAMK2B,NUMA1,BRSK2,SYT7,OSM,OXCT1,CD40,PRKN,CD81,CDH1,CDK16,PDE1C,CACNA2D2,PDZK1,CARD10,SSH1,PLA2G1B,PMAIP1,NECAB2,MAGED1,CSK,PRKCE,PRKCH,CROCC,CTSD,RAB11FIP3,MAGI2,PTPN1,SSC5D,PTPN14,TNFSF15,DPP4,DPP6,GPC6,SIDT2,EFNB2,EPHB2,LRRK2,LGR4…
GO: Biological Process	GO:0042074	cell migration involved in gastrulation		9.903E-5	9.463E-1	2.701E-3	2.631E-2	8	18	EPB41L5,MEGF8,FGF8,GPC3,TBXT,WNT11,CRB2,LRP5
GO: Biological Process	GO:0150063	visual system development		9.920E-5	9.480E-1	2.701E-3	2.631E-2	63	422	ACVRL1,MEIS1,MEIS2,GRHL3,MYH10,PRDM1,BMP7,BMPR1B,NF2,NHS,SDK1,NOTCH2,CACNA1C,CACNA1S,NTRK2,CDKN1C,PDE6B,PDGFRB,CLCN2,PITX3,CNGA3,COL4A1,COL8A1,COL8A2,DLL4,CRYBB3,PROX1,IFT140,TRAF3IP1,MFRP,ZEB2,CASZ1,PTPRM,DIO3,NR2E3,GRK1,EPHB1,EPHB2,IRX5,FBN2,FGFR3,FGFR2,ZHX2,ATF6,TENM3,SMARCA4,MEGF11,MIAT,TTLL5,KDM2B,GNAT1,FOXN4,TDRD7,HMGB1,HPCA,USH2A,WNT7B,BCL11B,MDM1,LIMK2,LMX1B,LRP5,SMAD3
GO: Biological Process	GO:0040008	regulation of growth		1.001E-4	9.561E-1	2.716E-3	2.646E-2	106	801	ACACB,MAP1B,ACVRL1,MEIS1,RNF157,PARP1,AKT1,SEMA6A,MMP14,PI16,APBB2,APP,CPNE5,SEMA4G,SPTBN4,MSX1,ARHGAP4,DACT3,TNK1,NF2,ZPR1,BRAT1,NOTCH2,CACNA1C,NPR1,SEMA5A,CXCL16,IGSF11,SYT2,OSM,PRKN,CD81,MAP3K13,LGI1,CACNA2D2,ENPP1,SEMA5B,FTO,AKAP6,BCAR1,AATK,PPT1,ITSN2,PRKCB,MAP2K5,PROX1,DAB2IP,PTPRS,DIO3,HBEGF,SGK2,MEGF8,BNIPL,LEF1,RPS6KA1,CDKL3,MEG3,ACSL4,FBP1,ATXN2,FGF8,FGF13,FGFR1,FGFR3,FGFR2,SEMA6C,SEMA3…
GO: Biological Process	GO:0046883	regulation of hormone secretion		1.008E-4	9.637E-1	2.730E-3	2.660E-2	51	322	ADORA1,SLC25A5,MADD,TNFSF11,PHPT1,PDE8B,CACNA1A,CACNA1C,CACNA1D,CACNA1E,BRSK2,SYT7,OSM,OXCT1,PRKN,CDK16,PDE1C,CACNA2D2,PRKCE,RAB11FIP3,DPP4,SIDT2,FGFR1,SFRP1,ATG7,ITSN1,UQCC2,RAB11FIP1,SREBF1,NMU,GHRH,ABCC8,GNAS,GPLD1,TCF7L2,FFAR2,RAPGEF4,SIRT4,TIAM1,HTR2C,ICA1,C1QTNF12,ITPR1,ITPR2,ITPR3,KCNA5,KCNB1,KCNQ1,HMGA2,LRP1,LRP5
GO: Biological Process	GO:0050806	positive regulation of synaptic transmission		1.018E-4	9.732E-1	2.749E-3	2.678E-2	38	218	ADORA1,ADORA2A,TSHZ3,APP,CACNA1D,CAMK2B,NTRK2,IGSF11,SYT2,SYT7,OXTR,LGI1,SSH1,PRKCE,CX3CR1,EPHA4,EPHB2,CACNG3,BAIAP2,PPP1R9A,CLSTN1,SLC1A3,RGS14,SLC8A2,SLC8A3,SHANK2,CACNG5,IQSEC2,CLSTN2,NMU,CUX2,GRIN2C,GRIP2,TNR,HTR2C,SHANK3,PINK1,ITPR3
GO: Biological Process	GO:0030201	heparan sulfate proteoglycan metabolic process		1.044E-4	9.981E-1	2.812E-3	2.739E-2	12	38	HS6ST2,HS6ST3,HS6ST1,HS2ST1,HS3ST3B1,HS3ST3A1,EXT1,XYLT1,SULF2,TCF7L2,NDST1,LIPC
GO: Biological Process	GO:0048863	stem cell differentiation		1.070E-4	1.000E0	2.871E-3	2.797E-2	46	282	ACVR1,FOXO4,SEMA6A,SEMA4G,MSX1,NRP2,BMP7,NFE2L2,CYP26C1,SEMA5A,RUNX2,OSM,SEMA5B,TCF7L1,PSMA6,PSMB6,PSMB7,ZEB2,MSI2,GSC,LIN28A,ESRRB,ETV4,FGFR2,SEMA6C,SEMA3F,SEMA4F,SEMA3C,SFRP1,SHC4,SOX5,SOX10,KBTBD8,GDNF,TBXT,TBX5,TCF3,CORO1C,WNT3,WNT7B,XRCC5,RBPJ,SEMA3G,LBH,KIT,HMGA2
GO: Biological Process	GO:0046330	positive regulation of JNK cascade		1.116E-4	1.000E0	2.987E-3	2.910E-2	30	158	MAP3K4,MAP3K5,FZD7,SH3RF1,APP,TNFSF11,TNFRSF11A,MAP3K6,MAP3K13,DAB2IP,RASSF2,ZEB2,PTPN1,EPHA4,TAOK3,NOD1,ANKRD6,NOX1,GAB1,MAP3K20,MAPK8IP3,FGD4,SYK,TIAM1,MAP4K1,HMGB1,HRAS,WNT7B,LMNB1,LTBR
GO: Biological Process	GO:0009791	post-embryonic development		1.139E-4	1.000E0	3.041E-3	2.963E-2	26	129	ACADM,HEG1,MYO1E,PRDM1,NR4A2,CHST11,DHCR7,GRK1,CELA1,MECOM,MEG3,FGFR2,SEMA3C,ATG7,SLC8A1,SCUBE1,AGO2,CDH23,MAPK8IP3,GNAS,TCF7L2,SZT2,ALX4,ZFX,BCL11B,ITPR1
GO: Biological Process	GO:0007492	endoderm development		1.144E-4	1.000E0	3.045E-3	2.967E-2	39	227	MBP,ACVR1,FZD7,MMP14,MMP15,EPB41L5,PLPP3,BMP7,NF2,COL8A1,COL11A1,CELSR1,PRKAR1A,MAP2K5,SOX7,GSC,MEGF8,ELF5,LEF1,EXT1,EYA2,FGF8,FGFR1,FGFR2,SFRP1,CLASP2,GPC3,TBXT,TCF3,WNT3,WNT8B,WNT11,CRB2,ITGA5,ITGB4,LAMB1,HMGA2,LRP5,SMAD3
GO: Biological Process	GO:0048878	chemical homeostasis		1.149E-4	1.000E0	3.051E-3	2.972E-2	163	1334	ABCA2,SLC24A3,BTBD9,ADCY9,TPCN1,GRAMD1B,ADORA1,FZD9,ADORA2A,PARP1,SLC24A4,AKT1,FOXO4,ABCD1,ANK1,ANK2,ANK3,APP,TNFSF11,PHPT1,PDE8B,ATP1A1,ATP1A3,GRHL3,SLC4A4,CACNA1I,CACNA1G,CACNA1A,CACNA1C,CACNA1D,CACNA1E,NPR1,SLC11A2,ATP6V0E1,BRSK2,CASQ1,OXCT1,OXTR,CD40,PRKN,CDH1,CDK16,PDE1C,PDE4D,PDE6B,ENPP1,LIPG,PLA2G1B,PLCB3,PLCG1,CMKLR1,PLCG2,SLC25A23,MCOLN2,AKAP6,HJV,SLC31A1,POLD1,EGLN1,SLC30A7,NCOR2,PPT1,P…
GO: Biological Process	GO:0007017	microtubule-based process		1.159E-4	1.000E0	3.061E-3	2.982E-2	135	1071	MAP1B,MAP6,SMC1A,ATXN3,ARHGAP21,KIF6,FIGNL2,APBA1,APP,AP3B1,NCKAP5L,CDC14A,MADD,ARL3,MAPK15,SKAP1,TMEM108,TNKS,KIF1A,BBS1,ZPR1,CACNA1I,BSN,WASF1,UBXN10,CACNA1E,NUMA1,BRSK2,CAPZB,MAP7,ODF2,TTLL8,NEURL1,DNAAF1,EVI5L,CFAP251,RCC1,CFAP54,TBC1D22A,SUN2,TAF7L,CCDC78,ATXN10,PLTP,CATSPERZ,ONECUT2,DPCD,CHMP2B,CFAP61,CROCC,USP6NL,CPLANE2,IFT140,TRAF3IP1,IFT172,DCTN1,HAUS4,PURA,ULK4,DLG2,DNAH6,DNAH8,DNAH9,P…
GO: Biological Process	GO:0072009	nephron epithelium development		1.159E-4	1.000E0	3.061E-3	2.982E-2	25	122	CITED1,MYO1E,NOTCH2,NPHS1,PBX1,MAGED1,PODXL,IRX3,HS2ST1,MTSS1,MAGI2,PTPRO,FAT4,KIF26B,LGR4,SALL1,FMN1,FGF1,FGF8,GDNF,STAT1,GPC3,UMOD,WNT7B,WNT11
GO: Biological Process	GO:0051591	response to cAMP		1.165E-4	1.000E0	3.061E-3	2.982E-2	23	108	CITED1,APP,ASS1,PDE2A,PENK,PFKFB1,CNGA3,AKAP6,DUOX2,RAPGEF2,PTAFR,SLC5A5,SLC8A1,SLC8A3,SPARC,SREBF1,STAT1,RAPGEF1,EZR,ITPR1,ITPR2,ITPR3,KCNQ1
GO: Biological Process	GO:0015012	heparan sulfate proteoglycan biosynthetic process		1.169E-4	1.000E0	3.061E-3	2.982E-2	11	33	HS6ST2,HS6ST3,HS6ST1,HS2ST1,HS3ST3B1,HS3ST3A1,EXT1,XYLT1,TCF7L2,NDST1,LIPC
GO: Biological Process	GO:0030073	insulin secretion		1.170E-4	1.000E0	3.061E-3	2.982E-2	41	243	SLC25A5,PHPT1,PDE8B,CACNA1A,CACNA1C,CACNA1D,CACNA1E,BRSK2,SYT7,OXCT1,PRKN,CDK16,PDE1C,CACNA2D2,PRKCE,PTPRN2,DPP4,SIDT2,SFRP1,ATG7,RAB11FIP2,UQCC2,ILDR2,SREBF1,ABCC8,GPLD1,TCF7L2,RAPGEF4,SIRT4,TIAM1,PARK7,ICA1,C1QTNF12,ITPR1,ITPR2,ITPR3,KCNA5,KCNB1,KCNQ1,LRP1,LRP5
GO: Biological Process	GO:0030198	extracellular matrix organization		1.172E-4	1.000E0	3.061E-3	2.982E-2	60	399	MATN3,AEBP1,MMP14,MMP15,APBB2,APP,MYO1E,BGN,NPHS1,SEMA5A,CDH1,COL4A1,COL8A1,COL8A2,COL9A1,COL9A3,COL11A1,COL13A1,COL15A1,COL16A1,ADAMTS3,ADAMTS2,MMP28,SH3PXD2A,ADAMTS14,HTRA1,CRISPLD2,DPP4,FBLN1,FBLN2,FBN2,ADAMTS20,SCUBE1,NOX1,SMARCA4,SPARC,MMP27,CLASP2,COL25A1,SMOC2,SULF2,GPM6B,CARMIL2,TLL2,TNR,TNXB,VWA1,ITGA5,ITGA9,ITGAE,ITGB4,ADAMTS9,GFOD2,LAMA4,LAMB1,ADAM12,LMX1B,LOXL1,LRP1,SMAD3
GO: Biological Process	GO:0032872	regulation of stress-activated MAPK cascade		1.177E-4	1.000E0	3.065E-3	2.986E-2	44	267	MAP3K4,MAP3K5,FZD7,AKT1,SH3RF1,APP,TNFSF11,TNFRSF11A,MAP3K6,PRKN,MAP3K13,DAB2IP,RASSF2,ZEB2,PTPN1,ULK4,EPHA4,EPHB1,MECOM,TAOK3,NOD1,RELL1,SFRP1,ANKRD6,NOX1,GAB1,MAP3K20,PDCD4,MAPK8IP3,FGD4,SYK,RAPGEF1,TIAM1,MAP4K1,TNXB,HMGB1,HRAS,EZR,WNT7B,IGF1R,PINK1,KARS1,LMNB1,LTBR
GO: Biological Process	GO:0007162	negative regulation of cell adhesion		1.182E-4	1.000E0	3.070E-3	2.991E-2	51	324	MBP,ACVRL1,DSCAML1,FZD7,ADORA2A,ZNF608,AKT1,SEMA6A,MMP14,EPB41L5,APOD,ASS1,MUC1,NEXMIF,NF2,SEMA5A,CD9,CDH1,CDH13,ENPP2,PLXNA1,PODXL,TBX21,BCAR1,PRKAR1A,MAP2K5,DAB1,PTPRO,PTPRZ1,DTX1,LEF1,FBLN1,DLC1,ZNF703,SIPA1,CD276,SPOCK1,CLASP2,KANK1,AJAP1,AKNA,SRCIN1,TNR,CORO1C,HMGB1,NRARP,CLEC4G,LAG3,LAMB1,LRP1,SMAD7
GO: Biological Process	GO:0019932	second-messenger-mediated signaling		1.208E-4	1.000E0	3.127E-3	3.047E-2	87	634	ADA,TENM2,ADCY9,TPCN1,ADORA1,ADORA2A,ANK2,TNFSF11,MARCO,ADGRB1,ADGRB2,ADGRB3,KSR1,NEUROD2,NFATC2,ADGRD1,CACNA1C,CACNA1D,NPR1,NPR2,NTRK2,KSR2,CASQ1,OPRD1,CDH13,PDE2A,PDE4D,GPR37L1,CHRM3,PLCG1,CMKLR1,PLCG2,MCOLN2,AKAP6,EGLN1,PRKAR1A,RAPGEF2,CX3CR1,DMPK,PDE11A,ECE1,RCAN2,LRRK2,LGR4,CCL3,RASA3,PPP1R9A,ADGRL1,SLC8A1,CAMKK2,NR5A1,JPH4,PDE10A,GHRH,RUNDC3A,SYK,GNAI3,GNAL,GNAS,GNAT1,CAMTA1,GNAZ,ADGRL3,TCP…
GO: Biological Process	GO:0072511	divalent inorganic cation transport		1.222E-4	1.000E0	3.157E-3	3.075E-2	77	546	SLC24A3,TPCN1,ADORA2A,SLC24A4,REM1,ANK2,AP3B1,PHPT1,MYLK,SLC39A11,CRACR2B,CACNA1I,CACNA1G,CACNA1A,CACNA1C,CACNA1D,CACNA1E,CACNA1S,CACNG1,SLC11A2,CAMK2B,CASQ1,OPRD1,PDE2A,PDE4D,CACNA2D2,PDGFRB,AHNAK,PLA2G1B,PLCB3,PLCG1,PLCG2,SLC25A23,MCOLN2,AKAP6,SLC39A3,SLC39A2,SLC30A7,PLCH2,PRKCB,PRKCE,MCUB,CACNG3,TRPM3,CCL3,RASA3,SLC39A4,SLC8A2,SLC8A1,SLC8A3,THADA,CACNG5,FYN,FAM155B,JPH4,CDH23,CRACR2A,GRIN2C,ZD…
GO: Biological Process	GO:0043087	regulation of GTPase activity		1.241E-4	1.000E0	3.196E-3	3.113E-2	71	494	RALGAPA1,SIPA1L2,ARHGAP21,GIT1,ARHGAP4,GRHL3,DOCK11,ADGRB3,ASAP2,NTRK2,TBC1D25,CD40,DGKI,EVI5L,ARHGAP22,TBC1D22A,IQGAP3,PLXNA1,ARHGEF19,RGS6,RAPGEF2,USP6NL,DAB2IP,ARHGAP24,GIT2,TIAM2,RASIP1,PTPRN2,ARFGAP3,ARHGAP25,IQSEC3,RGS3,TNK2,EPHA4,MTSS2,EPHB3,APC2,LRRK2,TBC1D2,RSU1,TBC1D16,DLC1,CCL1,CCL3,AGAP1,AGAP3,SFRP1,RASA3,RAB11FIP2,PRR5,ASAP3,SIPA1,RGS14,ARFGAP2,NUP50,ARHGAP15,ARHGEF16,FGD4,GNAS,MAPRE…
GO: Biological Process	GO:0140352	export from cell		1.329E-4	1.000E0	3.415E-3	3.327E-2	204	1731	MBP,ADORA1,ADORA2A,PARP1,SCAMP5,MICAL3,VPS18,ANK1,GIT1,SLC25A5,PPFIA4,APBA1,APBA2,PPFIA3,APP,MADD,TNFSF11,PHPT1,PDE8B,ATP1A1,ATP1A3,RAP2C,MYH10,NAPA,BPI,AP1M1,CACNA1I,CACNA1G,CDK5R2,NOTCH2,CACNA1A,CACNA1C,CACNA1D,CACNA1E,NSF,NTRK2,BRSK2,SYT2,SYT7,OSM,OXCT1,OXTR,CD9,CD40,DGKI,PRKN,CDK16,PDE1C,CACNA2D2,PDZK1,NRXN3,NRXN2,OTOF,PKP1,PLA2G1B,PLCG1,MCOLN2,SEPTIN5,SELENOM,CELSR1,PPT1,ERC2,PRKCB,PRKCE,CTB…
GO: Biological Process	GO:0055082	cellular chemical homeostasis		1.334E-4	1.000E0	3.418E-3	3.330E-2	119	926	SLC24A3,TPCN1,ADORA1,FZD9,SLC24A4,ANK2,APP,PHPT1,PDE8B,ATP1A1,ATP1A3,SLC4A4,CACNA1I,CACNA1G,CACNA1A,CACNA1C,CACNA1D,CACNA1E,SLC11A2,ATP6V0E1,BRSK2,CASQ1,OXCT1,OXTR,CD40,PRKN,CDK16,PDE1C,PDE4D,PDE6B,ENPP1,PLA2G1B,PLCB3,PLCG1,CMKLR1,PLCG2,SLC25A23,MCOLN2,AKAP6,HJV,SLC31A1,EGLN1,SLC30A7,PPT1,PLCH2,PRKCB,PRKCE,CX3CR1,ZBTB20,PTPRN2,DMPK,MCUB,LIN28A,SIDT2,LRRK2,CCL1,CCL3,CIB2,ATG7,RASA3,RAB11FIP2,TMEM1…
GO: Biological Process	GO:0048562	embryonic organ morphogenesis		1.354E-4	1.000E0	3.458E-3	3.369E-2	52	334	ACVR1,DSCAML1,MMP14,MSX1,GRHL3,BMP7,MYO3A,NOTCH2,RUNX2,OTX1,DNAAF1,PRRX1,COL11A1,SLC39A3,CHST11,CELSR1,PROX1,IFT140,IFT172,PTK7,SOBP,GSC,MEGF8,OTOP1,EPHB2,IRX5,PDZD7,FBN2,SALL1,FGF8,FGFR1,FGFR2,SMARCA4,GJB6,CDH23,GLI2,KDM2B,TBXT,GNAS,TBX3,TCF7L2,FOXN4,TEAD1,TSHR,ALX4,NDST1,WNT11,ZIC3,RBPJ,CRB2,CHRNA10,SMAD3
GO: Biological Process	GO:0048880	sensory system development		1.394E-4	1.000E0	3.552E-3	3.460E-2	63	427	ACVRL1,MEIS1,MEIS2,GRHL3,MYH10,PRDM1,BMP7,BMPR1B,NF2,NHS,SDK1,NOTCH2,CACNA1C,CACNA1S,NTRK2,CDKN1C,PDE6B,PDGFRB,CLCN2,PITX3,CNGA3,COL4A1,COL8A1,COL8A2,DLL4,CRYBB3,PROX1,IFT140,TRAF3IP1,MFRP,ZEB2,CASZ1,PTPRM,DIO3,NR2E3,GRK1,EPHB1,EPHB2,IRX5,FBN2,FGFR3,FGFR2,ZHX2,ATF6,TENM3,SMARCA4,MEGF11,MIAT,TTLL5,KDM2B,GNAT1,FOXN4,TDRD7,HMGB1,HPCA,USH2A,WNT7B,BCL11B,MDM1,LIMK2,LMX1B,LRP5,SMAD3
GO: Biological Process	GO:0010810	regulation of cell-substrate adhesion		1.398E-4	1.000E0	3.552E-3	3.460E-2	40	237	ACVRL1,FZD7,ATXN3,MMP14,EPB41L5,APOD,SKAP1,NEXMIF,NF2,HACD1,CDH13,ENPP2,ONECUT2,COL8A1,COL16A1,BCAR1,PRKCE,PTPRO,PTPRZ1,PLEKHA2,RSU1,FBLN1,FBLN2,DLC1,FMN1,SFRP1,ST6GAL1,LIMCH1,SPOCK1,DISC1,CLASP2,SMOC2,KANK1,AJAP1,GPM6B,CORO1C,UTRN,ITGA5,LRP1,SMAD3
GO: Biological Process	GO:0070302	regulation of stress-activated protein kinase signaling cascade		1.401E-4	1.000E0	3.552E-3	3.460E-2	44	269	MAP3K4,MAP3K5,FZD7,AKT1,SH3RF1,APP,TNFSF11,TNFRSF11A,MAP3K6,PRKN,MAP3K13,DAB2IP,RASSF2,ZEB2,PTPN1,ULK4,EPHA4,EPHB1,MECOM,TAOK3,NOD1,RELL1,SFRP1,ANKRD6,NOX1,GAB1,MAP3K20,PDCD4,MAPK8IP3,FGD4,SYK,RAPGEF1,TIAM1,MAP4K1,TNXB,HMGB1,HRAS,EZR,WNT7B,IGF1R,PINK1,KARS1,LMNB1,LTBR
GO: Biological Process	GO:0099565	chemical synaptic transmission, postsynaptic		1.414E-4	1.000E0	3.574E-3	3.482E-2	35	198	ADORA1,ADORA2A,AKT1,APP,TMEM108,NPAS4,IGSF11,SHISA9,DGKI,PRKN,DLGAP2,CHRM3,SSH1,DMPK,LRRK2,ATXN1,BAIAP2,SLURP2,PPP1R9A,SHANK2,CACNG5,GABRB1,GABRE,CUX2,SYNE1,GRID2,GRIK3,GRIK4,GRIN2C,GRIP2,HRH3,SHANK3,CHRNA10,INSYN2A,LY6H
GO: Biological Process	GO:0071902	positive regulation of protein serine/threonine kinase activity		1.420E-4	1.000E0	3.580E-3	3.488E-2	56	368	MAP3K4,MAP3K5,ADORA1,AKT1,ARAF,MADD,TNFSF11,TNFRSF11A,CDK5R2,MAP3K6,CD40,CD81,MAP3K13,PDGFRB,PLA2G1B,IQGAP3,AKAP6,MAGED1,CSK,CSPG4,RAPGEF2,MAP2K5,MAP2K6,PROX1,DAB2IP,ZEB2,PTPN1,DUSP7,DUSP9,EPHA4,EPHB2,LRRK2,TAOK3,NOD1,FGF1,FGFR1,TAB1,GAB1,MAP3K20,MAPK8IP3,FGD4,SYK,RAPGEF1,TEAD1,GRM4,TIAM1,MAP4K1,AKAP13,HRAS,HTR2A,WNT7B,IGF1R,INSR,KARS1,KIT,HMGA2
GO: Biological Process	GO:1905477	positive regulation of protein localization to membrane		1.434E-4	1.000E0	3.607E-3	3.514E-2	27	138	AKT1,ANK3,NMT1,PRKN,CD81,PDZK1,SSH1,PMAIP1,NECAB2,PRKCE,PRKCH,DPP6,EPHB2,RAB11FIP2,FYN,ARHGEF16,MTCL1,TFDP1,GRIP2,HPCA,HRAS,EZR,YWHAG,NKD2,KCNB1,LRP1,LRP5
GO: Biological Process	GO:0061387	regulation of extent of cell growth		1.482E-4	1.000E0	3.718E-3	3.622E-2	26	131	MAP1B,SEMA6A,SEMA4G,ARHGAP4,SEMA5A,MAP3K13,SEMA5B,AATK,PTPRS,MEGF8,CDKL3,FGF13,SEMA6C,SEMA3F,SEMA4F,SEMA3C,SLIT1,DISC1,FSTL4,CLASP2,TTL,TNR,MGLL,WNT3,SEMA3G,LRP1
GO: Biological Process	GO:0001763	morphogenesis of a branching structure		1.539E-4	1.000E0	3.849E-3	3.750E-2	41	246	ACVR1,MMP14,CITED1,PRDM1,BMP7,NOTCH4,SEMA5A,MAP3K13,PBX1,CDH1,PLXNA1,COL4A1,COL13A1,MAGED1,DLL4,CELSR1,CTSD,PROX1,RASIP1,FAT4,LEF1,LRRK2,ETV4,LGR4,ETV5,SALL1,FGF1,FGF8,FGFR1,FGFR2,SEMA3C,SFRP1,SOX10,GDNF,GPC3,GLI2,TBX3,NRARP,VDR,HMGA2,LRP5
GO: Biological Process	GO:0001657	ureteric bud development		1.559E-4	1.000E0	3.890E-3	3.790E-2	23	110	TSHZ3,CITED1,BMP7,PBX1,CRLF1,MAGED1,HS2ST1,FAT4,KIF26B,LGR4,SALL1,FMN1,FGF1,FGF8,FGFR1,FGFR2,SFRP1,GDNF,GPC3,WNT11,SMAD3,SMAD6,SMAD7
GO: Biological Process	GO:0045879	negative regulation of smoothened signaling pathway		1.584E-4	1.000E0	3.942E-3	3.841E-2	11	34	RUNX2,MOSMO,ENPP1,GPR37L1,TRAF3IP1,RFX4,MEGF8,SALL1,FGFR3,GPC3,WNT7B
GO: Biological Process	GO:0060402	calcium ion transport into cytosol		1.632E-4	1.000E0	4.050E-3	3.945E-2	33	184	TPCN1,ANK2,CACNA1I,CACNA1G,CACNA1C,CASQ1,PDE4D,PLA2G1B,PLCB3,PLCG1,PLCG2,MCOLN2,AKAP6,PLCH2,PRKCE,CCL3,RASA3,SLC8A2,SLC8A1,SLC8A3,FYN,FAM155B,JPH4,GRIN2C,TMBIM6,FAM155A,HTR2A,HTR2C,ITPR1,ITPR2,ITPR3,JPH2,JPH3
GO: Biological Process	GO:0003281	ventricular septum development		1.651E-4	1.000E0	4.087E-3	3.981E-2	19	83	ACVR1,HEG1,PRDM1,PDE2A,EGLN1,PROX1,PTK7,ZFPM1,SALL1,FGFR2,SLIT3,SMARCA4,TBX5,TBX3,WNT11,RBPJ,SALL4,SMAD6,SMAD7
GO: Biological Process	GO:0070588	calcium ion transmembrane transport		1.689E-4	1.000E0	4.171E-3	4.063E-2	55	362	SLC24A3,TPCN1,SLC24A4,REM1,ANK2,PHPT1,CACNA1I,CACNA1G,CACNA1A,CACNA1C,CACNA1D,CACNA1E,CACNA1S,CACNG1,CASQ1,PDE2A,PDE4D,CACNA2D2,AHNAK,PLCB3,PLCG1,PLCG2,SLC25A23,MCOLN2,AKAP6,PLCH2,PRKCE,MCUB,CACNG3,TRPM3,CCL3,RASA3,SLC8A2,SLC8A1,SLC8A3,THADA,CACNG5,FYN,FAM155B,JPH4,CRACR2A,GRIN2C,TRPC4,HPCA,FAM155A,HRH1,HTR2A,HTR2C,ITPR1,ITPR2,ITPR3,CHRNA10,TRPC7,JPH2,JPH3
GO: Biological Process	GO:0090087	regulation of peptide transport		1.702E-4	1.000E0	4.191E-3	4.083E-2	112	867	MBP,ADORA1,ADORA2A,PARP1,SCAMP5,USP36,ANK3,SLC25A5,APOD,MADD,TNFSF11,PHPT1,PDE8B,MYH10,ZPR1,CACNA1A,CACNA1C,CACNA1D,CACNA1E,BRSK2,SYT7,OSM,OXCT1,CD40,PRKN,CD81,CDH1,CDK16,PDE1C,CACNA2D2,PDZK1,PLA2G1B,CSK,PRKCE,RAB11FIP3,PTPN1,SSC5D,PTPN14,TNFSF15,DPP4,SIDT2,EFNB2,LRRK2,LGR4,FBLN1,CCL1,CCL3,SFRP1,ATG7,OTUD5,ITSN1,UQCC2,RAB11FIP1,ABLIM3,FRMD4A,SIRT2,ANKRD1,FOXP1,FYN,CD276,SORL1,SREBF1,ARFIP1,NMU,GH…
GO: Biological Process	GO:0034629	cellular protein-containing complex localization		1.732E-4	1.000E0	4.254E-3	4.144E-2	10	29	AKAP6,KLHL21,ZNF365,NDC1,NACC2,TNFAIP2,EZR,RALGAPB,RALGAPA2,SMAD7
GO: Biological Process	GO:0072006	nephron development		1.775E-4	1.000E0	4.348E-3	4.236E-2	30	162	CITED1,MYO1E,BMP7,NOTCH2,NPHS1,PBX1,PDGFRB,MAGED1,PODXL,IRX3,HS2ST1,MTSS1,MAGI2,PTPRO,FAT4,KIF26B,LGR4,SALL1,FMN1,FGF1,FGF8,GDNF,STAT1,KIRREL3,SULF2,GPC3,UMOD,WNT7B,WNT11,NUP107
GO: Biological Process	GO:1902533	positive regulation of intracellular signal transduction		1.786E-4	1.000E0	4.366E-3	4.254E-2	139	1119	PIK3AP1,ADA,MAP3K4,MAP3K5,FZD7,ADORA1,AKT1,SH3RF1,APP,ARAF,MADD,MSX1,TNFSF11,MARCO,IL20RA,TNFRSF11A,TNFRSF10B,KSR1,NEUROD2,NOTCH2,NPR1,NPR2,NTRK2,ROR1,KSR2,SEMA5A,MAP3K6,OSM,CD40,DGKI,PRKN,CD81,MAP3K13,CDH13,PDGFRB,GPR37L1,CARD10,DSTYK,PLA2G1B,IQGAP3,CARD14,PMAIP1,AKAP6,NECAB2,MAGED1,EEF1E1,NRG2,CSK,CHD5,CSPG4,AUTS2,PRKCB,PRKCE,RAPGEF2,MAP2K5,MAP2K6,CX3CR1,DAB2IP,RASSF2,ZEB2,PTPN1,TNFSF15,HBEGF,D…
GO: Biological Process	GO:0072164	mesonephric tubule development		1.797E-4	1.000E0	4.370E-3	4.257E-2	23	111	TSHZ3,CITED1,BMP7,PBX1,CRLF1,MAGED1,HS2ST1,FAT4,KIF26B,LGR4,SALL1,FMN1,FGF1,FGF8,FGFR1,FGFR2,SFRP1,GDNF,GPC3,WNT11,SMAD3,SMAD6,SMAD7
GO: Biological Process	GO:0072163	mesonephric epithelium development		1.797E-4	1.000E0	4.370E-3	4.257E-2	23	111	TSHZ3,CITED1,BMP7,PBX1,CRLF1,MAGED1,HS2ST1,FAT4,KIF26B,LGR4,SALL1,FMN1,FGF1,FGF8,FGFR1,FGFR2,SFRP1,GDNF,GPC3,WNT11,SMAD3,SMAD6,SMAD7
GO: Biological Process	GO:0086010	membrane depolarization during action potential		1.810E-4	1.000E0	4.390E-3	4.277E-2	12	40	ANK2,ANK3,CACNA1I,CACNA1G,CACNA1C,CACNA1D,PDE4D,SCN4A,SCN5A,SCN8A,SLC8A1,KCNH2
GO: Biological Process	GO:0015672	monovalent inorganic cation transport		1.865E-4	1.000E0	4.510E-3	4.394E-2	95	714	KCNH7,SLC24A3,TPCN1,ADORA1,SLC24A4,AK4,AKT1,ABCD1,ANK1,ANK2,ANK3,SLC6A16,SPTBN4,KCNK5,ATP1A1,ATP1A3,SLC4A4,AFG1L,NDUFB5,CACNA1D,SLC11A2,ATP6V0E1,NSF,SLC28A1,PDE2A,SLC25A23,CNTN1,AKAP6,PRKCE,DMPK,PCSK9,DPP6,SGK2,OTOP1,SLC45A2,KCNIP3,KCNIP1,KCNU1,SCN4A,SCN5A,SCN8A,FGF12,FGF13,TMEM175,UQCC2,SLC1A2,SLC1A3,SLC5A5,SLC6A1,SLC6A8,SLC6A9,SLC6A11,SLC8A2,SLC8A1,SLC8A3,CNKSR3,SLC9A9,OTOP2,SIK1,SLC28A3,SLC12A…
GO: Biological Process	GO:0051056	regulation of small GTPase mediated signal transduction		1.869E-4	1.000E0	4.510E-3	4.394E-2	54	355	RALGAPA1,MCF2,PLEKHG1,HEG1,ARHGEF37,SIPA1L2,ARHGAP21,GIT1,MADD,ARHGAP4,TNK1,NOTCH2,DGKI,PDGFRB,CYTH2,ARHGAP22,ARHGEF19,ITSN2,AUTS2,DAB2IP,ARHGAP24,TIAM2,FARP2,RASIP1,ARHGAP25,IQSEC3,RALGPS2,FARP1,KCTD10,RHOT1,EPHB2,EPS8,OBSCN,DLC1,FBP1,RASA3,ITSN1,ARFGEF2,SIPA1,ARHGEF40,ARHGAP15,IQSEC2,ARHGEF16,KANK1,FGD4,MAPRE2,ARHGEF28,RAPGEF1,TIAM1,AKAP13,HRAS,RALGAPB,RALGAPA2,SPRY4
GO: Biological Process	GO:0010463	mesenchymal cell proliferation		1.894E-4	1.000E0	4.559E-3	4.442E-2	15	58	MSX1,BMP7,NFIB,PRRX1,FAT4,FGFR1,FGFR2,FBXW4,FOXP1,STAT1,GPC3,SYNE1,HMGB1,WNT11,LRP5
GO: Biological Process	GO:0099562	maintenance of postsynaptic density structure		1.908E-4	1.000E0	4.582E-3	4.464E-2	6	11	DLGAP1,MAGI2,DLG2,DLG3,SHANK2,SHANK3
GO: Biological Process	GO:0071695	anatomical structure maturation		1.914E-4	1.000E0	4.585E-3	4.467E-2	35	201	ACVRL1,AKT1,ANK3,APP,ARCN1,SCARF1,SPTBN4,ADGRB3,CDK5R2,CACNA1A,NPR2,NR4A2,MAP3K13,CDKN1C,B4GALT5,CSPG4,FEV,CX3CR1,FARP2,DLG2,FAT4,EPHA8,IRX5,LRRK2,ZBTB7A,MBTPS2,FGFR3,SHB,SIRT2,NFASC,C1QL1,XYLT1,ANKS1A,GRIP2,RBPJ
GO: Biological Process	GO:0051403	stress-activated MAPK cascade		1.923E-4	1.000E0	4.594E-3	4.476E-2	50	322	MAP3K4,MAP3K5,FZD7,AKT1,SH3RF1,APP,TNFSF11,TNFRSF11A,NPHS1,MAP3K6,PRKN,MAP3K13,DAB2IP,RASSF2,ZEB2,PTPN1,ULK4,DUSP9,IRAK4,EPHA4,EPHB1,MECOM,TAOK3,NOD1,FGF12,FGFR3,TAB1,RELL1,SFRP1,ANKRD6,NOX1,GAB1,MAP3K20,PDCD4,MAPK8IP3,FGD4,SYK,RAPGEF1,TIAM1,MAP4K1,TNXB,HMGB1,HRAS,EZR,WNT7B,IGF1R,PINK1,KARS1,LMNB1,LTBR
GO: Biological Process	GO:0043410	positive regulation of MAPK cascade		1.928E-4	1.000E0	4.594E-3	4.476E-2	83	607	MAP3K4,MAP3K5,FZD7,ADORA1,SH3RF1,APP,ARAF,MADD,TNFSF11,MARCO,TNFRSF11A,KSR1,NOTCH2,NTRK2,KSR2,MAP3K6,OSM,CD40,CD81,MAP3K13,PDGFRB,GPR37L1,DSTYK,PLA2G1B,IQGAP3,NECAB2,MAGED1,CSK,CSPG4,PRKCE,RAPGEF2,MAP2K5,MAP2K6,DAB2IP,RASSF2,ZEB2,PTPN1,DUSP7,DUSP9,EPHA4,EPHA8,EPHB2,LRRK2,TAOK3,NOD1,FGF1,CCL1,CCL3,FGF8,FGFR1,FGFR3,TAB1,FGFR2,RELL1,ANKRD6,NOX1,GAB1,MAP3K20,DENND2B,MAPK8IP3,FGD4,SYK,WWC1,RAPGEF1,GRM…
GO: Biological Process	GO:0007219	Notch signaling pathway		1.951E-4	1.000E0	4.626E-3	4.506E-2	36	209	AKT1,MMP14,APP,BMP7,NOTCH2,NOTCH4,TSPEAR,NEURL1,PBX1,PGAM2,CNTN1,DLL4,IFT172,FAT4,DTX1,TSPAN5,KCTD10,RCAN2,ZBTB7A,MAML3,MAML2,SPEN,ZNF423,STAT1,DTX4,GOT1,WWC1,GRIP2,POFUT1,NRARP,NIBAN2,RBPJ,GDPD5,KCNA5,KIT,LLGL1
GO: Biological Process	GO:0035235	ionotropic glutamate receptor signaling pathway		1.951E-4	1.000E0	4.626E-3	4.506E-2	19	84	APP,ATP1A3,SHISA9,CNIH3,DLG2,DLG3,EPHB2,CACNG3,RPH3A,SHANK2,CACNG5,GRID2,GRIK3,GRIK4,GRIN2C,TIAM1,PARK7,SHANK3,PINK1
GO: Biological Process	GO:0060041	retina development in camera-type eye		2.080E-4	1.000E0	4.920E-3	4.793E-2	31	171	ACVRL1,MYH10,BMPR1B,SDK1,NTRK2,PDE6B,PDGFRB,CLCN2,CNGA3,COL4A1,DLL4,PROX1,IFT140,MFRP,CASZ1,PTPRM,DIO3,NR2E3,GRK1,IRX5,ZHX2,SMARCA4,MEGF11,MIAT,TTLL5,GNAT1,FOXN4,HPCA,USH2A,MDM1,LRP5
GO: Biological Process	GO:0060401	cytosolic calcium ion transport		2.113E-4	1.000E0	4.986E-3	4.858E-2	35	202	TPCN1,ANK2,CACNA1I,CACNA1G,CACNA1C,CASQ1,PDE4D,PLA2G1B,PLCB3,PLCG1,PLCG2,SLC25A23,MCOLN2,AKAP6,PLCH2,PRKCE,MCUB,CCL3,RASA3,SLC8A2,SLC8A1,SLC8A3,FYN,FAM155B,JPH4,GRIN2C,TMBIM6,FAM155A,HTR2A,HTR2C,ITPR1,ITPR2,ITPR3,JPH2,JPH3
GO: Biological Process	GO:0070306	lens fiber cell differentiation		2.119E-4	1.000E0	4.986E-3	4.858E-2	11	35	NF2,CDKN1C,PITX3,PROX1,ZEB2,FGFR3,FGFR2,SMARCA4,TDRD7,WNT7B,SMAD3
GO: Biological Process	GO:0061178	regulation of insulin secretion involved in cellular response to glucose stimulus		2.181E-4	1.000E0	5.121E-3	4.989E-2	18	78	PHPT1,PDE8B,CACNA1D,CACNA1E,BRSK2,OXCT1,PRKN,CDK16,PDE1C,PRKCE,SIDT2,ATG7,GPLD1,TCF7L2,TIAM1,C1QTNF12,LRP1,LRP5
GO: Biological Process	GO:0006813	potassium ion transport		2.324E-4	1.000E0	5.443E-3	5.302E-2	44	275	KCNH7,SLC24A3,ADORA1,SLC24A4,ANK2,ANK3,KCNK5,ATP1A1,ATP1A3,CACNA1D,NSF,AKAP6,DPP6,SGK2,KCNIP3,KCNIP1,KCNU1,SCN4A,TMEM175,SLC1A3,SLC9A9,SLC12A8,SLC9C1,ABCC8,GRIK3,GRIK4,KCNH6,HTR2A,KCNA5,KCNA7,KCNB1,KCND3,KCNG1,KCNH1,KCNH2,KCNJ6,KCNMA1,KCNN1,KCNN3,KCNN4,KCNQ1,KCNAB1,KCNQ3,WNK2
GO: Biological Process	GO:0070201	regulation of establishment of protein localization		2.330E-4	1.000E0	5.443E-3	5.303E-2	112	874	MBP,ADORA2A,PARP1,SCAMP5,USP36,ANK3,SLC25A5,EPB41L5,APOD,MADD,PHPT1,PDE8B,MYH10,ZPR1,NMT1,CACNA1A,CACNA1C,CACNA1D,CACNA1E,BRSK2,SYT7,OSM,OXCT1,CD40,PRKN,CD81,CDH1,CDK16,PDE1C,CACNA2D2,PDZK1,PLA2G1B,PMAIP1,CSK,PRKCE,CTSD,RAB11FIP3,PTPN1,SSC5D,PTPN14,TNFSF15,DPP4,SIDT2,EFNB2,LRRK2,LGR4,FBLN1,CCL1,CCL3,SFRP1,ATG7,OTUD5,UQCC2,RAB11FIP1,ABLIM3,FRMD4A,SIRT2,ANKRD1,FOXP1,FYN,CD276,SORL1,SREBF1,ARFIP1,NM…
GO: Biological Process	GO:0030325	adrenal gland development		2.384E-4	1.000E0	5.555E-3	5.412E-2	10	30	PBX1,CDKN1C,PDGFRB,SALL1,NR5A1,WNT11,IGF1R,INSR,HMGA2,SMAD3
GO: Biological Process	GO:0060993	kidney morphogenesis		2.400E-4	1.000E0	5.578E-3	5.434E-2	22	106	TSHZ3,CITED1,BMP7,PBX1,PDGFRB,MAGED1,IRX3,HS2ST1,FAT4,KIF26B,LRRK2,LGR4,SALL1,FMN1,FGF1,FGF8,FRAS1,GDNF,STAT1,GPC3,WNT7B,WNT11
GO: Biological Process	GO:0001503	ossification		2.410E-4	1.000E0	5.578E-3	5.434E-2	64	444	ACVR1,AXIN2,FZD9,AKT1,MMP14,CITED1,TNFSF11,TNFRSF11A,BMP7,BMPR1B,NFE2,NPR2,LIMD1,RUNX2,PBX1,CDH11,ENPP1,PENK,COL11A1,COL13A1,DUOX2,GLIS1,RASSF2,MTSS1,FAT4,LEF1,LGR4,EXT1,FBN2,CCL3,FGFR1,FGFR3,FGFR2,RRAS2,SFRP1,BMP2K,HDAC7,SLC8A1,SND1,CD276,TOB2,SPARC,WWOX,XYLT1,GLA,GPC3,GLI2,GNAS,GPLD1,GPM6B,TCF7L2,SUN1,TMEM119,SIK3,ANKH,THRA,FNDC3B,WNT3,WNT7B,WNT11,RBPJ,LRP5,SMAD3,SMAD6
GO: Biological Process	GO:0051338	regulation of transferase activity		2.411E-4	1.000E0	5.578E-3	5.434E-2	135	1089	ADCY9,MAP3K4,AXIN2,MAP3K5,ADORA1,ADORA2A,HEG1,AKT1,TRIB2,PIK3R3,DGKE,APP,ARAF,MADD,C1GALT1C1,TNFSF11,MAPK15,PHPT1,TNKS,RAP2C,TNFRSF11A,TNFRSF10B,KSR1,BMP7,NF2,BSN,CDK5R2,NTRK2,MAP3K6,NEURL1,CD40,DGKI,PRKN,CD81,MAP3K13,CDC25C,PAQR3,CDKN1C,PDGFRB,ENPP1,CARD10,PFKFB1,DSTYK,PLA2G1B,IQGAP3,CARD14,AKAP6,MAGED1,POT1,PPP2R5C,CSK,CSPG4,PRKAG1,PRKAR1A,RAPGEF2,MAP2K5,MAP2K6,PROX1,DAB2IP,RASSF2,DAB1,DGKG,ZEB…
GO: Biological Process	GO:0009611	response to wounding		2.462E-4	1.000E0	5.683E-3	5.536E-2	99	756	MAP1B,MCAM,ACTG1,ACVRL1,MAP3K5,FZD7,FZD9,ADORA2A,DGKE,APOD,AP3B1,SCARF1,C1GALT1C1,PLPP3,GRHL3,MYH10,MYLK,DOCK11,NFE2,NFE2L2,NOTCH2,NOTCH4,CAPZB,SYT7,CD9,CD40,DGKI,CD81,CD151,PAX7,LARGE1,PDGFRB,PLCG2,ARHGEF19,DUOX2,CELSR1,PRKAR1A,PRKCB,PRKCE,PRKCH,CX3CR1,KLK6,ARHGAP24,DGKG,JAML,PTGFRN,PTK7,PTPRS,RAD51B,HBEGF,LGR6,EPHA4,ZFPM1,EHD2,FBLN1,FCER1G,FGFR3,FGFR2,SRSF6,SLC1A2,SLC1A3,SCUBE1,FYN,SPARC,CLASP2…
GO: Biological Process	GO:0030902	hindbrain development		2.469E-4	1.000E0	5.686E-3	5.539E-2	33	188	ARCN1,PHOX2A,NCOA1,MYH10,BMP7,NEUROD2,NFIB,NFIX,CDK5R2,CACNA1A,OTX1,GPR37L1,CNTN1,CTNNA2,PROX1,DAB1,PTPRS,SAMD4B,RFX4,LEF1,DLC1,ATXN2,SCN5A,ATG7,ZNF365,SMARCA4,MYO16,GLI2,KDM2B,GRID2,SEZ6L,IGF1R,LMX1B
GO: Biological Process	GO:0010927	cellular component assembly involved in morphogenesis		2.556E-4	1.000E0	5.872E-3	5.721E-2	25	128	ACTA1,ACTG1,ANK2,MYH3,MYH10,NRAP,CASQ1,CD9,PDGFRB,LMOD1,PRKAR1A,PROX1,NECTIN2,KIAA0319L,OBSCN,FHOD3,ANKRD1,FOXP1,NFASC,CLASP2,ZPBP,SEC23IP,AKAP13,TTN,ITGB4
GO: Biological Process	GO:0031098	stress-activated protein kinase signaling cascade		2.567E-4	1.000E0	5.883E-3	5.732E-2	53	351	MAP3K4,MAP3K5,FZD7,AKT1,SH3RF1,APP,TNFSF11,TNFRSF11A,NPHS1,MAP3K6,PRKN,MAP3K13,MAP2K5,MAP2K6,DAB2IP,RASSF2,ZEB2,PTPN1,ULK4,DUSP9,IRAK4,EPHA4,EPHB1,MECOM,TAOK3,NOD1,FGF12,FGFR3,TAB1,RELL1,SFRP1,ANKRD6,NOX1,GAB1,STK26,MAP3K20,PDCD4,MAPK8IP3,FGD4,SYK,RAPGEF1,TIAM1,MAP4K1,TNXB,HMGB1,HRAS,EZR,WNT7B,IGF1R,PINK1,KARS1,LMNB1,LTBR
GO: Biological Process	GO:0007517	muscle organ development		2.604E-4	1.000E0	5.952E-3	5.798E-2	68	480	ACTA1,MEIS1,FZD7,HEG1,FOXO4,PI16,MSX1,ASS1,ZFHX3,MYH3,MYLK,ADGRB1,NPHS1,CACNA1S,CASQ1,NEURL1,PAX7,LARGE1,GTF3C5,CNTFR,AKAP6,COL11A1,DLL4,EGLN1,RBFOX1,PROX1,BOC,PSMA6,MTSS1,TSC22D3,HBEGF,GSC,EFNB2,MYH14,LEF1,EPHB1,SPEG,ZFPM1,MEG3,SCN8A,FGF8,FGFR1,FGFR2,MRAS,UQCC2,HDAC7,SIRT2,ANKRD1,DMRTA2,FOXP1,MEGF10,ZNF609,POPDC3,TBX5,TCF7L2,NR2F2,TLL2,HLF,TTN,ALX4,UTRN,CYP26B1,NIBAN2,RBPJ,KCNAB1,JPH2,SMAD3,SMAD7
GO: Biological Process	GO:0030048	actin filament-based movement		2.640E-4	1.000E0	6.020E-3	5.865E-2	29	158	ACTA1,ADORA1,ANK2,APBB2,EPB41L5,ATP1A1,MYH3,MYH10,MYL4,MYO1E,CACNA1G,CACNA1C,CACNA1D,PDE4D,SUN2,AKAP6,DSG2,MYH14,SCN5A,FGF12,FGF13,SYNE2,TPM3,TTN,KCNA5,KCND3,KCNH2,KCNQ1,WIPF2
GO: Biological Process	GO:1901888	regulation of cell junction assembly		2.759E-4	1.000E0	6.278E-3	6.116E-2	20	93	ACVRL1,MMP14,EPB41L5,APOD,ENPP2,COL16A1,PRKCH,RAPGEF2,ACE2,DLC1,FMN1,SFRP1,LIMCH1,CLASP2,GPM6B,RAPGEF1,CORO1C,GPBAR1,LRP1,SMAD3
GO: Biological Process	GO:0021846	cell proliferation in forebrain		2.798E-4	1.000E0	6.339E-3	6.176E-2	11	36	KIF1A,NCOR2,ZEB2,FABP7,FGF8,FGFR1,FGFR2,DISC1,AKNA,WNT7B,HMGA2
GO: Biological Process	GO:0010720	positive regulation of cell development		2.800E-4	1.000E0	6.339E-3	6.176E-2	91	686	MAP1B,MAP6,RNF157,SEMA6A,ENC1,CPNE5,SCARF1,TNFSF11,NCOA1,BMP7,NEUROD2,NFE2L2,CAMK2B,NTRK2,SEMA5A,SYT2,NEURL1,PRKN,MAP3K13,ENPP2,PLXNA1,CNTN1,AKAP6,IRX3,RGS6,ITSN2,PRKCH,KDM4A,RAPGEF2,CUX1,CX3CR1,PROX1,DAB2IP,DAB1,ZEB2,PTK7,MAGI2,PTPRZ1,FEZF2,LIN28A,MEGF8,FBXO31,EPHA4,EPHB2,CDKL3,ETV5,SALL1,ATXN1,CCL3,FGFR1,BAIAP2,SEMA3C,ITSN1,PPP1R9A,SH3GL3,ZNF365,TRAK1,RGS14,SIRT2,SHANK2,TENM3,ANKRD1,DMRTA2,SPEN…
GO: Biological Process	GO:0071805	potassium ion transmembrane transport		2.860E-4	1.000E0	6.461E-3	6.295E-2	40	245	KCNH7,SLC24A3,SLC24A4,ANK2,ANK3,KCNK5,ATP1A1,ATP1A3,CACNA1D,AKAP6,DPP6,SGK2,KCNIP3,KCNIP1,KCNU1,TMEM175,SLC1A3,SLC9A9,SLC12A8,SLC9C1,ABCC8,GRIK3,GRIK4,KCNH6,KCNA5,KCNA7,KCNB1,KCND3,KCNG1,KCNH1,KCNH2,KCNJ6,KCNMA1,KCNN1,KCNN3,KCNN4,KCNQ1,KCNAB1,KCNQ3,WNK2
GO: Biological Process	GO:0055065	metal ion homeostasis		2.870E-4	1.000E0	6.469E-3	6.302E-2	97	741	SLC24A3,BTBD9,TPCN1,ADORA1,FZD9,ADORA2A,SLC24A4,ANK1,ANK2,ANK3,APP,TNFSF11,ATP1A1,ATP1A3,CACNA1I,CACNA1G,CACNA1A,CACNA1C,CACNA1D,CACNA1E,NPR1,SLC11A2,CASQ1,OXTR,CD40,PRKN,PDE4D,PDE6B,PLA2G1B,PLCB3,PLCG1,CMKLR1,PLCG2,SLC25A23,MCOLN2,AKAP6,HJV,SLC31A1,EGLN1,SLC30A7,PLCH2,PRKCB,PRKCE,CX3CR1,MTSS1,DMPK,MCUB,SCN5A,CCL1,CCL3,CIB2,RASA3,SLC39A4,MON1A,CLSTN1,SLC8A2,SLC8A1,SLC8A3,THADA,CORIN,FYN,FAM155B,J…
GO: Biological Process	GO:0030282	bone mineralization		2.897E-4	1.000E0	6.514E-3	6.346E-2	25	129	ACVR1,AXIN2,FZD9,BMP7,BMPR1B,NFE2,ENPP1,DUOX2,MTSS1,LGR4,FBN2,CCL3,FGFR3,FGFR2,BMP2K,SLC8A1,CD276,GLA,GPC3,GPM6B,TCF7L2,TMEM119,ANKH,WNT11,SMAD3
GO: Biological Process	GO:0031401	positive regulation of protein modification process		2.928E-4	1.000E0	6.569E-3	6.399E-2	165	1379	ACVR1,ACVRL1,ADCY9,MAP3K4,AXIN2,MAP3K5,FZD7,ADORA1,ADORA2A,AKT1,TRIB2,SH3RF1,PIK3R3,DGKE,APP,ARAF,MADD,TNFSF11,MAPK15,PLPP3,RAP2C,MUC1,MARCO,TNFRSF11A,TNFRSF10B,KSR1,BMP7,NFE2,BRAT1,CDK5R2,NOTCH2,NTRK2,KSR2,MAP3K6,OPRD1,OSM,NEURL1,CD40,DGKI,PRKN,CD81,MAP3K13,PAX7,CRLF1,PDGFRB,ENPP2,GPR37L1,CARD10,KPNA7,DSTYK,PLA2G1B,IQGAP3,CARD14,CNTN1,AKAP6,NECAB2,MAGED1,RWDD3,NCOR2,CSK,CSPG4,PRKAG1,AUTS2,PRKAR1…
GO: Biological Process	GO:0021814	cell motility involved in cerebral cortex radial glia guided migration		2.973E-4	1.000E0	6.654E-3	6.482E-2	5	8	SUN2,DAB2IP,SYNE2,SUN1,BMERB1
GO: Biological Process	GO:0060996	dendritic spine development		3.008E-4	1.000E0	6.717E-3	6.543E-2	24	122	ARID1B,GIT1,SDK1,CAMK2B,NEURL1,DNM3,PTPRS,EPHA4,EPHB1,EPHB2,EPHB3,LRRK2,ACSL4,BAIAP2,ITSN1,PPP1R9A,ZNF365,SHANK2,DISC1,FSTL4,CUX2,SRCIN1,TIAM1,SHANK3
GO: Biological Process	GO:0051966	regulation of synaptic transmission, glutamatergic		3.050E-4	1.000E0	6.793E-3	6.618E-2	18	80	ADORA1,ADORA2A,TSHZ3,NTRK2,OXTR,DGKI,PRKN,LRRK2,CACNG3,SHANK2,CACNG5,DISC1,IQSEC2,GRIK3,GRM4,TNR,HTR2A,SHANK3
GO: Biological Process	GO:0051223	regulation of protein transport		3.082E-4	1.000E0	6.844E-3	6.668E-2	106	825	MBP,ADORA2A,PARP1,SCAMP5,USP36,ANK3,SLC25A5,APOD,MADD,PHPT1,PDE8B,MYH10,ZPR1,CACNA1A,CACNA1C,CACNA1D,CACNA1E,BRSK2,SYT7,OSM,OXCT1,CD40,PRKN,CD81,CDH1,CDK16,PDE1C,CACNA2D2,PDZK1,PLA2G1B,CSK,PRKCE,RAB11FIP3,PTPN1,SSC5D,PTPN14,TNFSF15,DPP4,SIDT2,EFNB2,LRRK2,LGR4,FBLN1,CCL1,CCL3,SFRP1,ATG7,OTUD5,UQCC2,RAB11FIP1,ABLIM3,FRMD4A,SIRT2,ANKRD1,FOXP1,FYN,CD276,SORL1,SREBF1,ARFIP1,NMU,SUPT6H,ABCC8,SYK,MTCL1,…
GO: Biological Process	GO:0032409	regulation of transporter activity		3.096E-4	1.000E0	6.844E-3	6.668E-2	49	320	REM1,ANK2,ANK3,APP,CACNA1A,CACNA1D,CASQ1,SHISA9,HTR3B,PDE4D,PIRT,PDZK1,AHNAK,PLCG1,PLCG2,AKAP6,PON1,PRKCE,PTAFR,CNIH3,DLG2,DLG3,PCSK9,SGK2,EPHB2,CACNG3,FGF12,RPH3A,THADA,SHANK2,CNKSR3,CACNG5,ANO9,JPH4,ABCC8,CRACR2A,HK1,PARK7,HPCA,UTRN,SHANK3,PINK1,INSR,KCNG1,KCNQ1,KCNAB1,WNK2,JPH2,JPH3
GO: Biological Process	GO:0001823	mesonephros development		3.101E-4	1.000E0	6.844E-3	6.668E-2	23	115	TSHZ3,CITED1,BMP7,PBX1,CRLF1,MAGED1,HS2ST1,FAT4,KIF26B,LGR4,SALL1,FMN1,FGF1,FGF8,FGFR1,FGFR2,SFRP1,GDNF,GPC3,WNT11,SMAD3,SMAD6,SMAD7
GO: Biological Process	GO:0021510	spinal cord development		3.101E-4	1.000E0	6.844E-3	6.668E-2	23	115	AKT1,UNCX,PHOX2A,MDGA1,ZPR1,CACNA1A,PAX7,PBX3,DLL4,PROX1,IFT172,DAB1,DCTN1,PTPRS,RFX4,FOXP1,NKX6-2,GDNF,GLI2,VSTM5,FOXN4,IGHMBP2,GDPD5
GO: Biological Process	GO:0043506	regulation of JUN kinase activity		3.170E-4	1.000E0	6.979E-3	6.799E-2	22	108	MAP3K4,MAP3K5,TNFSF11,TNFRSF11A,MAP3K6,MAP3K13,DAB2IP,ZEB2,PTPN1,EPHA4,TAOK3,SFRP1,GAB1,MAP3K20,PDCD4,MAPK8IP3,FGD4,SYK,TIAM1,MAP4K1,TNXB,WNT7B
GO: Biological Process	GO:0001667	ameboidal-type cell migration		3.197E-4	1.000E0	7.008E-3	6.828E-2	70	501	ACVR1,ACVRL1,AKT1,SEMA6A,PIK3R3,EPB41L5,SEMA4G,ARHGAP4,PLPP3,ADGRB1,NRP2,BMP7,NFE2L2,SEMA5A,CD40,CDH13,ENPP2,CARD10,SEMA5B,PLCG1,DLL4,BCAR1,ADGRA2,NUS1,PRKCE,MAP2K5,PROX1,DAB2IP,ZEB2,PTPRM,PTPRR,DPP4,HBEGF,EFNB2,MEGF8,FGF1,FGF8,FGFR1,SEMA6C,SEMA3F,SEMA4F,SEMA3C,HDAC7,SLC8A1,FOXP1,SOX10,SPARC,AGO2,PBLD,CLASP2,SMOC2,GDNF,STAT1,KANK1,GPC3,SYNE2,TBXT,MAPRE2,GPLD1,NR2F2,TNS1,CORO1C,HMGB1,WNT11,CRB2,SE…
GO: Biological Process	GO:0048864	stem cell development		3.205E-4	1.000E0	7.008E-3	6.828E-2	20	94	ACVR1,SEMA6A,SEMA4G,NRP2,BMP7,CYP26C1,SEMA5A,SEMA5B,ZEB2,MSI2,SEMA6C,SEMA3F,SEMA4F,SEMA3C,SOX10,KBTBD8,GDNF,CORO1C,WNT7B,SEMA3G
GO: Biological Process	GO:0097061	dendritic spine organization		3.205E-4	1.000E0	7.008E-3	6.828E-2	20	94	CAMK2B,DNM3,EPHA4,EPHB1,EPHB2,EPHB3,LRRK2,BAIAP2,PPP1R9A,ZNF365,RPH3A,SHANK2,FYN,CUX2,SRCIN1,TIAM1,SHANK3,IGF1R,TANC1,INSR
GO: Biological Process	GO:0099560	synaptic membrane adhesion		3.229E-4	1.000E0	7.044E-3	6.863E-2	10	31	MDGA1,LRFN4,MAGI2,PTPRS,GPC4,LRRC4,SLITRK2,CADM1,FLRT3,IL1RAP
GO: Biological Process	GO:0097553	calcium ion transmembrane import into cytosol		3.289E-4	1.000E0	7.158E-3	6.974E-2	29	160	TPCN1,ANK2,CACNA1C,CASQ1,PDE4D,PLCB3,PLCG1,PLCG2,MCOLN2,AKAP6,PLCH2,PRKCE,CCL3,RASA3,SLC8A2,SLC8A1,SLC8A3,FYN,FAM155B,JPH4,GRIN2C,FAM155A,HTR2A,HTR2C,ITPR1,ITPR2,ITPR3,JPH2,JPH3
GO: Biological Process	GO:0090092	regulation of transmembrane receptor protein serine/threonine kinase signaling pathway		3.316E-4	1.000E0	7.202E-3	7.017E-2	42	263	ACVR1,ACVRL1,PARP1,CITED1,MSX1,BMP7,LDLRAD4,NOTCH2,NUMA1,CDKN1C,HJV,ONECUT2,SOSTDC1,CHST11,HTRA1,MAGI2,DMRT1,INHBE,LRG1,ZBTB7A,FBN2,ZNF703,SFRP1,WFIKKN1,PRDM16,SORL1,ZNF423,PBLD,GPC3,GLG1,GOT1,TCF7L2,RBPMS,KCP,RNF165,RBPJ,CRB2,PMEPA1,HTRA3,SMAD3,SMAD6,SMAD7
GO: Biological Process	GO:0046928	regulation of neurotransmitter secretion		3.330E-4	1.000E0	7.209E-3	7.023E-2	27	145	ADORA2A,VPS18,GIT1,APBA1,APBA2,NAPA,CACNA1A,CACNA1D,NTRK2,SYT2,SYT7,DGKI,PRKN,NRXN3,SEPTIN5,CELSR1,PRKCB,PRKCE,GIT2,RHOT1,LRRK2,PPP1R9A,GRM4,HTR2A,HTR2C,ICA1,KCNH1
GO: Biological Process	GO:0032412	regulation of ion transmembrane transporter activity		3.334E-4	1.000E0	7.209E-3	7.023E-2	46	296	REM1,ANK2,ANK3,APP,CACNA1A,CACNA1D,CASQ1,SHISA9,HTR3B,PDE4D,PIRT,PDZK1,AHNAK,PLCG1,PLCG2,AKAP6,PRKCE,PTAFR,CNIH3,DLG2,DLG3,PCSK9,EPHB2,CACNG3,FGF12,RPH3A,THADA,SHANK2,CNKSR3,CACNG5,ANO9,JPH4,ABCC8,CRACR2A,HK1,PARK7,HPCA,UTRN,SHANK3,PINK1,KCNG1,KCNQ1,KCNAB1,WNK2,JPH2,JPH3
GO: Biological Process	GO:0019725	cellular homeostasis		3.347E-4	1.000E0	7.221E-3	7.035E-2	134	1088	SLC24A3,TPCN1,ADORA1,FZD9,SLC24A4,ANK2,APP,PHPT1,PDE8B,ATP1A1,ATP1A3,SLC4A4,NFE2L2,CACNA1I,CACNA1G,CACNA1A,CACNA1C,CACNA1D,CACNA1E,SLC11A2,ATP6V0E1,BRSK2,CASQ1,OXCT1,OXTR,CD40,PRKN,LARGE1,CDK16,PDE1C,PDE4D,PDE6B,ENPP1,CLCN6,PLA2G1B,PLCB3,PLCG1,CMKLR1,PLCG2,SLC25A23,MCOLN2,AKAP6,HJV,SLC31A1,POLD1,EGLN1,CHMP2B,SLC30A7,PPT1,PLCH2,PRIM2,PRKCB,PRKCE,CX3CR1,ZBTB20,DCTN1,PTPRN2,DMPK,MCUB,LIN28A,SIDT2,RH…
GO: Biological Process	GO:0086046	membrane depolarization during SA node cell action potential		3.391E-4	1.000E0	7.298E-3	7.110E-2	4	5	ANK2,CACNA1G,CACNA1D,SCN5A
GO: Biological Process	GO:0032940	secretion by cell		3.414E-4	1.000E0	7.332E-3	7.143E-2	196	1683	MBP,ADORA1,ADORA2A,PARP1,SCAMP5,MICAL3,VPS18,ANK1,GIT1,SLC25A5,PPFIA4,APBA1,APBA2,PPFIA3,APP,MADD,TNFSF11,PHPT1,PDE8B,RAP2C,MYH10,NAPA,BPI,AP1M1,CACNA1I,CACNA1G,CDK5R2,NOTCH2,CACNA1A,CACNA1C,CACNA1D,CACNA1E,NSF,NTRK2,BRSK2,SYT2,SYT7,OSM,OXCT1,OXTR,CD9,CD40,DGKI,PRKN,CDK16,PDE1C,CACNA2D2,NRXN3,NRXN2,OTOF,PKP1,PLA2G1B,PLCG1,MCOLN2,SEPTIN5,SELENOM,CELSR1,PPT1,ERC2,PRKCB,PRKCE,CTBP2,CTSD,RAB11FIP3,CP…
GO: Biological Process	GO:0007528	neuromuscular junction development		3.446E-4	1.000E0	7.383E-3	7.192E-2	15	61	FZD9,ANK3,APP,CACNA1S,NTRK2,CACNA2D2,COL4A1,DCTN1,LRRK2,ETV5,FGFR2,SHANK2,UTRN,SHANK3,LRP5
GO: Biological Process	GO:0048638	regulation of developmental growth		3.505E-4	1.000E0	7.493E-3	7.300E-2	61	424	ACACB,MAP1B,MEIS1,RNF157,AKT1,SEMA6A,PI16,APP,CPNE5,SEMA4G,SPTBN4,ARHGAP4,CACNA1C,SEMA5A,SYT2,PRKN,MAP3K13,CACNA2D2,SEMA5B,FTO,AKAP6,AATK,ITSN2,PROX1,PTPRS,DIO3,MEGF8,CDKL3,ATXN2,FGF8,FGF13,FGFR1,FGFR3,FGFR2,SEMA6C,SEMA3F,SEMA4F,SEMA3C,SFRP1,SLIT1,FOXP1,DISC1,FSTL4,CLASP2,GHRH,GNAS,WWC1,TBX5,TCF7L2,TLL2,TTL,TNR,MGLL,TSHR,EZR,WNT3,RBPJ,INSR,SEMA3G,HMGA2,LRP1
GO: Biological Process	GO:0050877	nervous system process		3.522E-4	1.000E0	7.506E-3	7.313E-2	189	1616	ABCA4,MBP,BTBD9,MEIS2,ADORA1,FZD9,ADORA2A,PTCHD1,SLC24A4,AKT1,TSHZ3,ANK3,APP,CDC14A,SPTBN4,SLC25A12,PDE8B,TMEM108,ATP1A3,NPAS4,MYH10,ADGRB3,BBS1,RTL4,MYO3A,NEUROD2,AP1S2,CACNA1I,CACNA1G,MYRF,CA6,NPAS1,CACNA1A,CACNA1C,CACNA1D,CACNA1E,SLC11A2,CAMK2B,NTRK2,ROR1,TSPEAR,SEMA5A,IGSF11,OPRD1,SHISA9,OXTR,DGKI,PRKN,HTR3B,PBX3,CDH1,OTOG,DLGAP2,PDE1C,PDE6B,PENK,CHRM3,NRXN3,SSH1,NRXN2,OTOF,SEMA5B,RETREG1,JAK…
GO: Biological Process	GO:0050857	positive regulation of antigen receptor-mediated signaling pathway		3.543E-4	1.000E0	7.506E-3	7.313E-2	9	26	ADA,CD81,PRKCB,PRKCH,TESPA1,NECTIN2,USP12,FOXP1,KCNN4
GO: Biological Process	GO:0022030	telencephalon glial cell migration		3.543E-4	1.000E0	7.506E-3	7.313E-2	9	26	CDK5R2,SUN2,DAB2IP,DAB1,DISC1,SYNE2,SUN1,BMERB1,LAMB1
GO: Biological Process	GO:0021801	cerebral cortex radial glia guided migration		3.543E-4	1.000E0	7.506E-3	7.313E-2	9	26	CDK5R2,SUN2,DAB2IP,DAB1,DISC1,SYNE2,SUN1,BMERB1,LAMB1
GO: Biological Process	GO:0098771	inorganic ion homeostasis		3.643E-4	1.000E0	7.702E-3	7.503E-2	107	838	SLC24A3,BTBD9,TPCN1,ADORA1,FZD9,ADORA2A,SLC24A4,ANK1,ANK2,ANK3,APP,TNFSF11,ATP1A1,ATP1A3,SLC4A4,CACNA1I,CACNA1G,CACNA1A,CACNA1C,CACNA1D,CACNA1E,NPR1,SLC11A2,ATP6V0E1,CASQ1,OXTR,CD40,PRKN,PDE4D,PDE6B,ENPP1,PLA2G1B,PLCB3,PLCG1,CMKLR1,PLCG2,SLC25A23,MCOLN2,AKAP6,HJV,SLC31A1,EGLN1,SLC30A7,PPT1,PLCH2,PRKCB,PRKCE,CX3CR1,MTSS1,DMPK,MCUB,LRRK2,SCN5A,CCL1,CCL3,CIB2,RASA3,TMEM175,SLC39A4,MON1A,CLSTN1,SLC8A…
GO: Biological Process	GO:0043547	positive regulation of GTPase activity		3.651E-4	1.000E0	7.702E-3	7.503E-2	60	416	RALGAPA1,SIPA1L2,ARHGAP21,GIT1,ARHGAP4,GRHL3,DOCK11,ADGRB3,ASAP2,TBC1D25,CD40,EVI5L,ARHGAP22,TBC1D22A,ARHGEF19,RGS6,RAPGEF2,USP6NL,DAB2IP,ARHGAP24,GIT2,TIAM2,ARFGAP3,ARHGAP25,IQSEC3,RGS3,MTSS2,APC2,LRRK2,TBC1D2,RSU1,TBC1D16,DLC1,CCL1,CCL3,AGAP1,AGAP3,SFRP1,RASA3,RAB11FIP2,PRR5,ASAP3,SIPA1,RGS14,ARFGAP2,NUP50,ARHGAP15,ARHGEF16,GNAS,MAPRE2,RAPGEF1,TIAM1,CORO1C,HRAS,WNT11,DOCK8,RGL3,RALGAPB,RALGAPA2…
GO: Biological Process	GO:0098659	inorganic cation import across plasma membrane		3.712E-4	1.000E0	7.796E-3	7.595E-2	20	95	KCNK5,ATP1A1,ATP1A3,SLC11A2,CNGA3,SLC31A1,SLC39A4,SLC8A2,SLC8A1,SLC8A3,FYN,FAM155B,SLC9A9,SLC12A8,SLC9C1,FAM155A,KCND3,KCNH2,KCNJ6,WNK2
GO: Biological Process	GO:0099587	inorganic ion import across plasma membrane		3.712E-4	1.000E0	7.796E-3	7.595E-2	20	95	KCNK5,ATP1A1,ATP1A3,SLC11A2,CNGA3,SLC31A1,SLC39A4,SLC8A2,SLC8A1,SLC8A3,FYN,FAM155B,SLC9A9,SLC12A8,SLC9C1,FAM155A,KCND3,KCNH2,KCNJ6,WNK2
GO: Biological Process	GO:0014074	response to purine-containing compound		3.792E-4	1.000E0	7.947E-3	7.742E-2	30	169	ADORA2A,CITED1,APP,ASS1,CACNA1S,PDE2A,PENK,PFKFB1,SSH1,PLCG2,CNGA3,AKAP6,DUOX2,RAPGEF2,PTAFR,CIB2,SLC5A5,SLC6A1,SLC8A1,SLC8A3,SPARC,SREBF1,STAT1,GNAL,RAPGEF1,EZR,ITPR1,ITPR2,ITPR3,KCNQ1
GO: Biological Process	GO:0007520	myoblast fusion		3.815E-4	1.000E0	7.976E-3	7.771E-2	13	49	ADGRB1,ADGRB3,NFATC2,NPHS1,CACNA1S,CD9,CD81,PTGFRN,EHD2,FLT3LG,TANC1,KCNH1,ADAM12
GO: Biological Process	GO:0007613	memory		3.918E-4	1.000E0	8.174E-3	7.963E-2	28	154	BTBD9,APP,ATP1A3,NPAS4,NTRK2,OXTR,CX3CR1,KMT2B,RCAN2,ATXN1,FGF13,RGS14,SLC8A2,SLC8A3,SHANK2,SORCS3,ABCC8,CUX2,TAFA2,HRH3,HRH1,HTR2A,SHANK3,INSR,ITGA5,ITPR3,LMX1B,JPH3
GO: Biological Process	GO:0072507	divalent inorganic cation homeostasis		4.008E-4	1.000E0	8.344E-3	8.129E-2	79	585	SLC24A3,TPCN1,ADORA1,FZD9,SLC24A4,ANK2,ANK3,APP,TNFSF11,CACNA1I,CACNA1G,CACNA1A,CACNA1C,CACNA1D,CACNA1E,CASQ1,OXTR,CD40,PRKN,PDE4D,PDE6B,PLA2G1B,PLCB3,PLCG1,CMKLR1,PLCG2,SLC25A23,MCOLN2,AKAP6,SLC30A7,PLCH2,PRKCB,PRKCE,CX3CR1,MTSS1,DMPK,MCUB,SCN5A,CCL1,CCL3,CIB2,RASA3,SLC39A4,CLSTN1,SLC8A2,SLC8A1,SLC8A3,THADA,FYN,FAM155B,JPH4,DISC1,CDH23,NMU,GHRH,GNAS,GOT1,GRIN2C,TMBIM6,ATP13A2,HRH3,TRPC4,HMGB1,FA…
GO: Biological Process	GO:0006941	striated muscle contraction		4.042E-4	1.000E0	8.398E-3	8.181E-2	33	193	MB,ADORA1,ANK2,ATP1A1,ATP1A3,MYH3,MYL4,CACNA1G,CACNA1C,CACNA1D,CACNA1S,CASQ1,PDE4D,PGAM2,CCDC78,AKAP6,MAP2K6,DMPK,DSG2,ACE2,MYH14,SCN4A,SCN5A,FGF12,FGF13,SLC8A1,SLC8A3,TTN,KCNA5,KCND3,KCNH2,KCNQ1,SMAD7
GO: Biological Process	GO:0031589	cell-substrate adhesion		4.276E-4	1.000E0	8.865E-3	8.636E-2	56	384	ACVRL1,FZD7,ATXN3,MMP14,EPB41L5,APOD,MSLNL,SKAP1,NEXMIF,NF2,VWA2,HACD1,CDH13,ENPP2,PARVB,ONECUT2,COL8A1,COL13A1,COL16A1,BCAR1,SNED1,PRKCE,PTPRO,PTPRZ1,EDA,PLEKHA2,EPHB1,EPHB3,RSU1,FBLN1,FBLN2,DLC1,FMN1,SFRP1,ST6GAL1,LIMCH1,SPOCK1,DISC1,CLASP2,SMOC2,KANK1,AJAP1,GPM6B,SRCIN1,TIAM1,TNXB,CORO1C,UTRN,FNDC3B,ITGA5,ITGB4,ADAMTS9,LAMB1,LRP1,SMAD3,SMAD6
GO: Biological Process	GO:0035272	exocrine system development		4.484E-4	1.000E0	9.254E-3	9.016E-2	14	56	BMP7,NFIB,CDH1,CLCN2,PLXNA1,EDA,CELA1,FGF8,FGFR1,FGFR2,SEMA3C,SOX10,IGF1R,INSR
GO: Biological Process	GO:0021795	cerebral cortex cell migration		4.484E-4	1.000E0	9.254E-3	9.016E-2	14	56	MDGA1,NRP2,CDK5R2,SUN2,CX3CR1,DAB2IP,DAB1,FGF13,FGFR1,DISC1,SYNE2,SUN1,BMERB1,LAMB1
GO: Biological Process	GO:0051235	maintenance of location		4.612E-4	1.000E0	9.498E-3	9.253E-2	54	368	ACACB,TPCN1,OSBPL11,AKT1,ARHGAP21,ANK2,ANK3,SPTBN4,NFKBIB,CACNA1C,CASQ1,IGSF11,PDE4D,ENPP1,SUN2,PLCB3,PLCG1,PLCG2,FTO,SLC25A23,MCOLN2,AKAP6,SLC30A7,PLCH2,PRKCE,VPS13D,CLMN,SMIM22,FBN2,CCL3,RASA3,SLC8A1,NR5A1,SORL1,JPH4,DGAT2,SYNE2,SYNE1,FFAR2,SUN1,PIP5K1C,THRA,HK1,PARK7,NR1H2,EZR,HTR2A,HTR2C,PINK1,ITPR1,ITPR2,ITPR3,JPH2,JPH3
GO: Biological Process	GO:0055080	cation homeostasis		4.627E-4	1.000E0	9.509E-3	9.263E-2	105	825	SLC24A3,BTBD9,TPCN1,ADORA1,FZD9,ADORA2A,SLC24A4,ANK1,ANK2,ANK3,APP,TNFSF11,ATP1A1,ATP1A3,SLC4A4,CACNA1I,CACNA1G,CACNA1A,CACNA1C,CACNA1D,CACNA1E,NPR1,SLC11A2,ATP6V0E1,CASQ1,OXTR,CD40,PRKN,PDE4D,PDE6B,PLA2G1B,PLCB3,PLCG1,CMKLR1,PLCG2,SLC25A23,MCOLN2,AKAP6,HJV,SLC31A1,EGLN1,SLC30A7,PPT1,PLCH2,PRKCB,PRKCE,CX3CR1,MTSS1,DMPK,MCUB,LRRK2,SCN5A,CCL1,CCL3,CIB2,RASA3,TMEM175,SLC39A4,MON1A,CLSTN1,SLC8A2,SLC8…
GO: Biological Process	GO:0035909	aorta morphogenesis		4.714E-4	1.000E0	9.666E-3	9.417E-2	11	38	ACVRL1,MYLK,NOTCH4,PDGFRB,DLL4,PROX1,EFNB2,FGF8,RBPJ,ADAMTS9,LRP1
GO: Biological Process	GO:0007258	JUN phosphorylation		4.729E-4	1.000E0	9.676E-3	9.427E-2	22	111	MAP3K4,MAP3K5,TNFSF11,TNFRSF11A,MAP3K6,MAP3K13,DAB2IP,ZEB2,PTPN1,EPHA4,TAOK3,SFRP1,GAB1,MAP3K20,PDCD4,MAPK8IP3,FGD4,SYK,TIAM1,MAP4K1,TNXB,WNT7B
GO: Biological Process	GO:0048813	dendrite morphogenesis		4.759E-4	1.000E0	9.718E-3	9.468E-2	31	179	MAP6,ADGRB3,CACNA1A,SLC11A2,CAMK2B,DNM3,CTNNA2,RAPGEF2,CUX1,PTPRZ1,FBXO31,FARP1,EPHA4,EPHB1,EPHB2,EPHB3,LRRK2,CDKL3,FMN1,BAIAP2,PPP1R9A,ZNF365,TRAK1,SHANK2,FYN,CUX2,SYNE1,SRCIN1,CIT,TIAM1,SHANK3
GO: Biological Process	GO:0010454	negative regulation of cell fate commitment		4.844E-4	1.000E0	9.869E-3	9.614E-2	7	17	FZD7,SPDEF,TBX21,SOSTDC1,GLIS1,CASZ1,NKX6-2
GO: Biological Process	GO:0051588	regulation of neurotransmitter transport		4.887E-4	1.000E0	9.925E-3	9.669E-2	33	195	ADORA2A,VPS18,GIT1,APBA1,APBA2,TNFSF11,NAPA,CACNA1A,CACNA1D,NTRK2,SYT2,SYT7,DGKI,PRKN,NRXN3,SEPTIN5,CELSR1,PRKCB,PRKCE,FEV,GIT2,RHOT1,LRRK2,PPP1R9A,SLC6A1,GDNF,GPM6B,GRM4,HRH3,HTR2A,HTR2C,ICA1,KCNH1
GO: Biological Process	GO:0061138	morphogenesis of a branching epithelium		4.892E-4	1.000E0	9.925E-3	9.669E-2	37	227	ACVR1,MMP14,CITED1,BMP7,NOTCH4,SEMA5A,PBX1,CDH1,PLXNA1,COL4A1,MAGED1,DLL4,CELSR1,CTSD,PROX1,RASIP1,FAT4,LEF1,ETV4,LGR4,ETV5,SALL1,FGF1,FGF8,FGFR1,FGFR2,SEMA3C,SFRP1,SOX10,GDNF,GPC3,GLI2,TBX3,NRARP,VDR,HMGA2,LRP5
GO: Biological Process	GO:2001257	regulation of cation channel activity		4.917E-4	1.000E0	9.955E-3	9.698E-2	34	203	REM1,ANK2,ANK3,APP,CACNA1A,CASQ1,SHISA9,PDE4D,PIRT,AHNAK,PLCG1,PLCG2,AKAP6,CNIH3,DLG2,DLG3,EPHB2,CACNG3,FGF12,RPH3A,SHANK2,CACNG5,JPH4,ABCC8,CRACR2A,PARK7,HPCA,SHANK3,PINK1,KCNG1,KCNQ1,KCNAB1,JPH2,JPH3
GO: Biological Process	GO:0014033	neural crest cell differentiation		4.939E-4	1.000E0	9.979E-3	9.722E-2	20	97	ACVR1,SEMA6A,SEMA4G,NRP2,BMP7,CYP26C1,SEMA5A,SEMA5B,ZEB2,GSC,SEMA6C,SEMA3F,SEMA4F,SEMA3C,SFRP1,SOX10,KBTBD8,GDNF,CORO1C,SEMA3G
GO: Biological Process	GO:0043507	positive regulation of JUN kinase activity		4.962E-4	1.000E0	1.000E-2	9.746E-2	19	90	MAP3K4,MAP3K5,TNFSF11,TNFRSF11A,MAP3K6,MAP3K13,DAB2IP,ZEB2,PTPN1,EPHA4,TAOK3,GAB1,MAP3K20,MAPK8IP3,FGD4,SYK,TIAM1,MAP4K1,WNT7B
GO: Biological Process	GO:0051893	regulation of focal adhesion assembly		5.001E-4	1.000E0	1.004E-2	9.782E-2	15	63	ACVRL1,MMP14,EPB41L5,APOD,ENPP2,COL16A1,DLC1,FMN1,SFRP1,LIMCH1,CLASP2,GPM6B,CORO1C,LRP1,SMAD3
GO: Biological Process	GO:0090109	regulation of cell-substrate junction assembly		5.001E-4	1.000E0	1.004E-2	9.782E-2	15	63	ACVRL1,MMP14,EPB41L5,APOD,ENPP2,COL16A1,DLC1,FMN1,SFRP1,LIMCH1,CLASP2,GPM6B,CORO1C,LRP1,SMAD3
GO: Biological Process	GO:0032270	positive regulation of cellular protein metabolic process		5.048E-4	1.000E0	1.011E-2	9.851E-2	204	1774	MBP,ACVR1,ACVRL1,ADCY9,MAP3K4,AXIN2,MAP3K5,FZD7,ADORA1,ADORA2A,ATXN3,AKT1,MMP14,TRIB2,SH3RF1,PIK3R3,DGKE,APP,ARAF,MADD,TNFSF11,MAPK15,PLPP3,RAP2C,MUC1,MARCO,TNFRSF11A,TNFRSF10B,KSR1,BMP7,NFE2,NFE2L2,BRAT1,CDK5R2,NOTCH2,SLC11A2,NTRK2,KSR2,CBFA2T3,MAP3K6,OPRD1,OSM,SH3D19,NEURL1,CD40,DGKI,PRKN,CD81,MAP3K13,PAX7,CRLF1,PDGFRB,ENPP2,GPR37L1,CARD10,KPNA7,TMEM259,DSTYK,PLA2G1B,IQGAP3,CARD14,PMAIP1,CNTN1,…
GO: Biological Process	GO:0007178	transmembrane receptor protein serine/threonine kinase signaling pathway		5.192E-4	1.000E0	1.038E-2	1.011E-1	56	387	ACVR1,ACVRL1,PARP1,CITED1,MSX1,BMP7,BMPR1B,LDLRAD4,NOTCH2,NUMA1,RUNX2,CDKN1C,HJV,ONECUT2,SOSTDC1,CHST11,HTRA1,MAGI2,FAM83G,DMRT1,INHBE,MEGF8,LEF1,MEG3,LRG1,ZBTB7A,FBN2,FGF8,TAB1,ZNF703,SFRP1,WFIKKN1,PRDM16,SORL1,ZNF423,PBLD,GDNF,PDCD4,GPC3,GLG1,BTBD11,TBXT,GOT1,TCF7L2,RBPMS,KCP,RNF165,RBPJ,CRB2,PMEPA1,HTRA3,LNPEP,LTBP2,SMAD3,SMAD6,SMAD7
GO: Biological Process	GO:0048015	phosphatidylinositol-mediated signaling		5.366E-4	1.000E0	1.069E-2	1.041E-1	33	196	PIK3AP1,AKT1,MUC5AC,NTRK2,OSM,PIRT,PDGFRB,PIK3C2B,PIK3C2G,PIP4K2A,PLCB3,PLCG1,PLCG2,FBXL2,PPP2R5C,PLCH2,DAB2IP,PTAFR,OBSCN,FGFR1,PRR5,SIRT2,FYN,MYO16,GAB1,UNC5B,PIP5K1C,EZR,HTR2A,IGF1R,INSR,KCNH1,KIT
GO: Biological Process	GO:1903391	regulation of adherens junction organization		5.370E-4	1.000E0	1.069E-2	1.041E-1	16	70	ACVRL1,MMP14,EPB41L5,APOD,ENPP2,COL16A1,DLC1,FMN1,SFRP1,LIMCH1,CLASP2,MAPRE2,GPM6B,CORO1C,LRP1,SMAD3
GO: Biological Process	GO:0099111	microtubule-based transport		5.404E-4	1.000E0	1.074E-2	1.046E-1	73	537	MAP1B,MAP6,ARHGAP21,APBA1,APP,AP3B1,CDC14A,MADD,ARL3,MAPK15,TMEM108,KIF1A,BBS1,BSN,WASF1,UBXN10,ODF2,TTLL8,NEURL1,DNAAF1,EVI5L,CFAP54,TBC1D22A,SUN2,ATXN10,ONECUT2,DPCD,CROCC,USP6NL,CPLANE2,IFT140,TRAF3IP1,IFT172,DCTN1,HAUS4,PURA,ULK4,DLG2,DNAH8,RFX4,LRPPRC,MEGF8,RHOT1,JHY,ABCC4,TBC1D2,TBC1D16,PIBF1,ABLIM3,TRAK1,DNAI1,RAB3IP,CDK5RAP2,DISC1,SEPTIN9,TTC21A,TTLL5,LCA5L,MAPK8IP3,SYNE2,ATMIN,SYNE1,SUN1…
GO: Biological Process	GO:0045936	negative regulation of phosphate metabolic process		5.665E-4	1.000E0	1.121E-2	1.092E-1	85	646	ZFYVE1,ELFN2,ADORA2A,PARP1,HEG1,AKT1,SEMA6A,TRIB2,PLPP3,MYO1D,BMP7,NF2,LDLRAD4,CTDSP1,CBFA2T3,PRKN,PAQR3,CDKN1C,PDE2A,PDE4D,ENPP1,PFKFB1,CSK,PHACTR3,PRKAR1A,DAB2IP,PHACTR2,TRAF3IP1,RASSF2,PTPN1,RASIP1,PTPRR,DLG2,DLG3,DUSP7,DUSP8,DUSP9,RANBP9,RGS3,ACE2,FARP1,PPP1R27,EPHB2,LRRK2,MECOM,SPRED3,FBLN1,TAOK3,FBP1,ATXN1,PRKAG2,PIBF1,SFRP1,SHB,RGS14,SIRT2,CNKSR3,SORL1,RBM26,PBLD,PDCD4,GRB10,RAPGEF1,C1QL4,…
GO: Biological Process	GO:0006029	proteoglycan metabolic process		5.675E-4	1.000E0	1.121E-2	1.092E-1	20	98	HS6ST2,HS6ST3,BGN,BMPR1B,HS6ST1,COL11A1,CHST11,HS2ST1,CSPG4,CHST9,HS3ST3B1,HS3ST3A1,CHPF,EXT1,XYLT1,SULF2,TCF7L2,CHST8,NDST1,LIPC
GO: Biological Process	GO:0003338	metanephros morphogenesis		5.676E-4	1.000E0	1.121E-2	1.092E-1	10	33	CITED1,PDGFRB,KIF26B,LGR4,SALL1,FMN1,FRAS1,GDNF,STAT1,WNT7B
GO: Biological Process	GO:0021536	diencephalon development		5.719E-4	1.000E0	1.125E-2	1.096E-1	18	84	PTCHD1,MSX1,NCOA1,NRP2,NR4A2,SEMA5A,OTX1,CDH1,DUOX2,ZEB2,SALL1,FGF8,SOX3,GHRH,GLI2,TCF7L2,RBPJ,HMGA2
GO: Biological Process	GO:1903507	negative regulation of nucleic acid-templated transcription		5.722E-4	1.000E0	1.125E-2	1.096E-1	162	1370	TENM2,MEIS2,SCAF4,PARP1,MTA3,ZNF608,AEBP1,FOXO4,MNT,TSHZ3,CITED1,MSX1,MAPK15,ZBTB10,ZFHX3,C11orf95,MUC1,PRDM1,BMP7,NEUROD2,NFATC2,NFIB,NFIC,NFIX,SPINDOC,NOTCH2,NPAS1,PCBP3,LIMD1,NR4A2,BTAF1,RUNX2,CBFA2T3,PRKN,LRRFIP1,CDKN1C,PDE2A,DDX54,RBM15B,SPDEF,CDYL,HJV,PRRX1,TBX4,MAGED1,DLL4,TBX21,HINFP,NCOR2,FOXP4,CRYM,CTBP2,FEV,KDM4A,MAP2K5,TCF7L1,GLIS1,CUX1,PROX1,DAB2IP,ZNF536,ZBTB20,SCRT1,TRAF3IP1,IFT172…
GO: Biological Process	GO:0090066	regulation of anatomical structure size		5.748E-4	1.000E0	1.128E-2	1.099E-1	79	592	MAP1B,ADORA1,ADORA2A,CRACD,AKT1,SEMA6A,SEMA4G,SPTBN4,ARHGAP4,MYO3A,CACNA1G,WASF1,NPHS1,CACNA1C,NPR1,CAPZB,SEMA5A,OXTR,MAP3K13,CHRM3,CLCN6,SEMA5B,LMOD1,IQGAP3,AATK,PRKCE,CTNNA2,PTAFR,HP1BP3,PTPRM,PTPRS,ECE1,ARPC1B,ACE2,MEGF8,EPS8,LRRK2,CDKL3,FMN1,FGF13,BAIAP2,SEMA6C,SEMA3F,SEMA4F,SEMA3C,LIMA1,PPP1R9A,FHOD3,SLC8A1,SLIT1,SPIRE2,DISC1,SPTB,FSTL4,SLC12A8,CLASP2,KANK1,TBXAS1,CARMIL2,ATP13A2,CIT,TTL,GRI…
GO: Biological Process	GO:0048705	skeletal system morphogenesis		5.788E-4	1.000E0	1.133E-2	1.104E-1	42	270	MATN3,DSCAML1,AXIN2,MMP14,UNCX,MSX1,BMP7,BMPR1B,VWA2,RUNX2,PDGFRB,CHAD,COL9A1,PRRX1,COL11A1,TBX4,COL13A1,SLC39A3,CHST11,IFT140,GSC,MEGF8,IRX5,FBN2,FMN1,FGFR1,FGFR3,FGFR2,SFRP1,WWOX,GLG1,TBXT,GNAS,TMEM119,SIK3,THRA,ALX4,NDST1,CYP26B1,VWA1,LRP5,SMAD3
GO: Biological Process	GO:0051253	negative regulation of RNA metabolic process		5.802E-4	1.000E0	1.134E-2	1.105E-1	172	1467	TENM2,MEIS2,AXIN2,SCAF4,PARP1,MTA3,ZNF608,AEBP1,FOXO4,MNT,TSHZ3,CITED1,MSX1,MAPK15,ZBTB10,ZFHX3,C11orf95,MUC1,PRDM1,BMP7,NEUROD2,NFATC2,NFIB,NFIC,NFIX,SPINDOC,NOTCH2,NPAS1,PCBP3,LIMD1,NR4A2,BTAF1,RUNX2,CBFA2T3,PRKN,LRRFIP1,CDKN1C,PDE2A,DDX54,RBM15B,PKP1,SPDEF,CDYL,HJV,PRRX1,TBX4,MAGED1,DLL4,TBX21,HINFP,NCOR2,FOXP4,CRYM,CTBP2,FEV,KDM4A,MAP2K5,TCF7L1,GLIS1,CUX1,PROX1,DAB2IP,ZNF536,ZBTB20,SCRT1,TRAF…
GO: Biological Process	GO:1903578	regulation of ATP metabolic process		5.912E-4	1.000E0	1.153E-2	1.123E-1	25	135	PARP1,AK4,ABCD1,APP,SLC25A12,NUP98,CBFA2T3,PRKN,PDE2A,PFKFB1,SLC25A23,PRKAG1,ZBTB20,ESRRB,ZBTB7A,FBP1,PRKAG2,UQCC2,NDC1,NUP50,PARK7,HTR2A,PINK1,INSR,NUP107
GO: Biological Process	GO:0010563	negative regulation of phosphorus metabolic process		5.946E-4	1.000E0	1.157E-2	1.127E-1	85	647	ZFYVE1,ELFN2,ADORA2A,PARP1,HEG1,AKT1,SEMA6A,TRIB2,PLPP3,MYO1D,BMP7,NF2,LDLRAD4,CTDSP1,CBFA2T3,PRKN,PAQR3,CDKN1C,PDE2A,PDE4D,ENPP1,PFKFB1,CSK,PHACTR3,PRKAR1A,DAB2IP,PHACTR2,TRAF3IP1,RASSF2,PTPN1,RASIP1,PTPRR,DLG2,DLG3,DUSP7,DUSP8,DUSP9,RANBP9,RGS3,ACE2,FARP1,PPP1R27,EPHB2,LRRK2,MECOM,SPRED3,FBLN1,TAOK3,FBP1,ATXN1,PRKAG2,PIBF1,SFRP1,SHB,RGS14,SIRT2,CNKSR3,SORL1,RBM26,PBLD,PDCD4,GRB10,RAPGEF1,C1QL4,…
GO: Biological Process	GO:0051058	negative regulation of small GTPase mediated signal transduction		5.981E-4	1.000E0	1.162E-2	1.132E-1	15	64	HEG1,GIT1,TNK1,DAB2IP,ARHGAP24,RASIP1,ARHGAP25,KCTD10,EPHB2,DLC1,FBP1,RASA3,KANK1,RAPGEF1,SPRY4
GO: Biological Process	GO:0022898	regulation of transmembrane transporter activity		6.046E-4	1.000E0	1.172E-2	1.142E-1	46	304	REM1,ANK2,ANK3,APP,CACNA1A,CACNA1D,CASQ1,SHISA9,HTR3B,PDE4D,PIRT,PDZK1,AHNAK,PLCG1,PLCG2,AKAP6,PRKCE,PTAFR,CNIH3,DLG2,DLG3,PCSK9,EPHB2,CACNG3,FGF12,RPH3A,THADA,SHANK2,CNKSR3,CACNG5,ANO9,JPH4,ABCC8,CRACR2A,HK1,PARK7,HPCA,UTRN,SHANK3,PINK1,KCNG1,KCNQ1,KCNAB1,WNK2,JPH2,JPH3
GO: Biological Process	GO:0007265	Ras protein signal transduction		6.088E-4	1.000E0	1.178E-2	1.147E-1	66	477	MCF2,PLEKHG1,HEG1,ARHGEF37,GIT1,MADD,ARHGAP4,RAP2C,TNK1,KSR1,WASF1,NOTCH2,KSR2,DGKI,CDH13,PDGFRB,CYTH2,GRAP2,IQGAP3,ARHGEF19,CELSR1,AATK,ITSN2,AUTS2,RAPGEF2,DAB2IP,ARHGAP24,ELMO1,TIAM2,FARP2,RASIP1,DNMT1,RALGDS,IQSEC3,RALGPS2,FARP1,KCTD10,RHOT1,EPHB2,EPS8,OBSCN,RSU1,DLC1,FBP1,BAIAP2,RRAS2,MRAS,RASA3,ITSN1,ARFGEF2,ARHGEF40,IQSEC2,ARHGEF16,KANK1,FGD4,MAPRE2,ARHGEF28,RAPGEF1,TIAM1,NISCH,AKAP13,PARK7…
GO: Biological Process	GO:1902679	negative regulation of RNA biosynthetic process		6.111E-4	1.000E0	1.180E-2	1.149E-1	162	1372	TENM2,MEIS2,SCAF4,PARP1,MTA3,ZNF608,AEBP1,FOXO4,MNT,TSHZ3,CITED1,MSX1,MAPK15,ZBTB10,ZFHX3,C11orf95,MUC1,PRDM1,BMP7,NEUROD2,NFATC2,NFIB,NFIC,NFIX,SPINDOC,NOTCH2,NPAS1,PCBP3,LIMD1,NR4A2,BTAF1,RUNX2,CBFA2T3,PRKN,LRRFIP1,CDKN1C,PDE2A,DDX54,RBM15B,SPDEF,CDYL,HJV,PRRX1,TBX4,MAGED1,DLL4,TBX21,HINFP,NCOR2,FOXP4,CRYM,CTBP2,FEV,KDM4A,MAP2K5,TCF7L1,GLIS1,CUX1,PROX1,DAB2IP,ZNF536,ZBTB20,SCRT1,TRAF3IP1,IFT172…
GO: Biological Process	GO:0060078	regulation of postsynaptic membrane potential		6.160E-4	1.000E0	1.186E-2	1.155E-1	29	166	ADORA1,ADORA2A,AKT1,APP,TMEM108,NPAS4,CACNA1C,IGSF11,DGKI,PRKN,SSH1,DMPK,LRRK2,ATXN1,BAIAP2,PPP1R9A,SHANK2,GABRB1,GABRE,CUX2,SYNE1,GRID2,GRIK3,GRIK4,GRIN2C,GRIP2,SHANK3,CHRNA10,INSYN2A
GO: Biological Process	GO:0086018	SA node cell to atrial cardiac muscle cell signaling		6.179E-4	1.000E0	1.186E-2	1.155E-1	5	9	ANK2,CACNA1G,CACNA1D,SCN5A,KCNA5
GO: Biological Process	GO:0086015	SA node cell action potential		6.179E-4	1.000E0	1.186E-2	1.155E-1	5	9	ANK2,CACNA1G,CACNA1D,SCN5A,KCNA5
GO: Biological Process	GO:0001952	regulation of cell-matrix adhesion		6.262E-4	1.000E0	1.199E-2	1.168E-1	24	128	ACVRL1,MMP14,EPB41L5,APOD,SKAP1,NEXMIF,NF2,CDH13,ENPP2,ONECUT2,COL16A1,PLEKHA2,DLC1,FMN1,SFRP1,LIMCH1,DISC1,CLASP2,AJAP1,GPM6B,CORO1C,UTRN,LRP1,SMAD3
GO: Biological Process	GO:1903364	positive regulation of cellular protein catabolic process		6.453E-4	1.000E0	1.233E-2	1.202E-1	27	151	ATXN3,AKT1,TRIB2,NFE2L2,CBFA2T3,PRKN,CD81,TMEM259,UBQLN2,DAB2IP,RNF144B,PCSK9,RBX1,RNFT1,LRRK2,ATG7,SGTA,UQCC2,SIRT2,SUMO3,DISC1,MAGEF1,EZR,NKD2,USP5,LRP1,SMAD7
GO: Biological Process	GO:0045892	negative regulation of transcription, DNA-templated		6.480E-4	1.000E0	1.236E-2	1.204E-1	156	1316	TENM2,MEIS2,SCAF4,PARP1,MTA3,ZNF608,AEBP1,FOXO4,MNT,TSHZ3,CITED1,MSX1,MAPK15,ZBTB10,ZFHX3,C11orf95,MUC1,PRDM1,BMP7,NFATC2,NFIB,NFIC,NFIX,SPINDOC,NOTCH2,NPAS1,PCBP3,LIMD1,NR4A2,BTAF1,RUNX2,CBFA2T3,PRKN,LRRFIP1,CDKN1C,PDE2A,RBM15B,SPDEF,HJV,PRRX1,TBX4,MAGED1,DLL4,TBX21,HINFP,NCOR2,FOXP4,CRYM,CTBP2,KDM4A,MAP2K5,TCF7L1,GLIS1,CUX1,PROX1,DAB2IP,ZNF536,ZBTB20,SCRT1,TRAF3IP1,IFT172,ZEB2,SOX7,PURA,DMRT1,D…
GO: Biological Process	GO:0046580	negative regulation of Ras protein signal transduction		6.574E-4	1.000E0	1.249E-2	1.217E-1	14	58	HEG1,GIT1,TNK1,DAB2IP,ARHGAP24,RASIP1,KCTD10,EPHB2,DLC1,FBP1,RASA3,KANK1,RAPGEF1,SPRY4
GO: Biological Process	GO:0061005	cell differentiation involved in kidney development		6.574E-4	1.000E0	1.249E-2	1.217E-1	14	58	TSHZ3,CITED1,MYO1E,NOTCH2,NPHS1,PODXL,MTSS1,MAGI2,PTPRO,FAT4,LGR4,SALL1,GDNF,STAT1
GO: Biological Process	GO:0048103	somatic stem cell division		6.607E-4	1.000E0	1.249E-2	1.217E-1	9	28	FZD7,LEF1,FGF13,FGFR1,FGFR2,SOX5,AKNA,LBH,KIT
GO: Biological Process	GO:0070509	calcium ion import		6.613E-4	1.000E0	1.249E-2	1.217E-1	19	92	CACNA1I,CACNA1G,CACNA1A,CACNA1C,CACNA1D,CACNA1E,CACNA1S,PDGFRB,SLC25A23,MCUB,CCL3,SLC8A2,SLC8A1,SLC8A3,FYN,FAM155B,TRPC4,FAM155A,HRH1
GO: Biological Process	GO:0019226	transmission of nerve impulse		6.613E-4	1.000E0	1.249E-2	1.217E-1	19	92	ANK3,SPTBN4,CACNA1I,CACNA1G,CACNA1A,CACNA1E,NTRK2,DPP6,MYH14,CACNG3,SCN4A,SCN5A,SCN8A,FGF12,CACNG5,NFASC,RAPGEF4,TNR,KCNMA1
GO: Biological Process	GO:0055074	calcium ion homeostasis		6.680E-4	1.000E0	1.259E-2	1.227E-1	73	541	SLC24A3,TPCN1,ADORA1,FZD9,SLC24A4,ANK2,APP,TNFSF11,CACNA1I,CACNA1G,CACNA1A,CACNA1C,CACNA1D,CACNA1E,CASQ1,OXTR,CD40,PDE4D,PDE6B,PLA2G1B,PLCB3,PLCG1,CMKLR1,PLCG2,SLC25A23,MCOLN2,AKAP6,PLCH2,PRKCB,PRKCE,CX3CR1,DMPK,MCUB,SCN5A,CCL1,CCL3,CIB2,RASA3,CLSTN1,SLC8A2,SLC8A1,SLC8A3,THADA,FYN,FAM155B,JPH4,DISC1,CDH23,NMU,GHRH,GNAS,GOT1,GRIN2C,TMBIM6,ATP13A2,HRH3,TRPC4,HMGB1,FAM155A,VDR,HTR2A,HTR2C,ITPR1,ITPR…
GO: Biological Process	GO:0032147	activation of protein kinase activity		6.746E-4	1.000E0	1.269E-2	1.236E-1	60	426	ADCY9,MAP3K4,MAP3K5,ADORA1,ADORA2A,AKT1,DGKE,ARAF,MADD,TNFSF11,TNFRSF10B,CDK5R2,MAP3K6,DGKI,CD81,MAP3K13,CARD10,PLA2G1B,IQGAP3,CARD14,CSPG4,PRKAR1A,MAP2K5,MAP2K6,DAB2IP,DGKG,PTPN1,TNFSF15,DUSP7,DUSP9,EPHB2,LRRK2,TAOK3,NOD1,FGF1,FGF13,TAB1,PRKAG2,PIBF1,PRR5,CAMKK2,GAB1,STK26,MAP3K20,MAPK8IP3,FGD4,SYK,RAPGEF1,GRM4,MAP4K1,PARK7,HMGB1,WNT7B,WNT11,IGF1R,PINK1,INSR,KARS1,KIT,LRP1
GO: Biological Process	GO:0042326	negative regulation of phosphorylation		7.003E-4	1.000E0	1.315E-2	1.281E-1	71	524	ADORA2A,HEG1,AKT1,SEMA6A,TRIB2,PLPP3,BMP7,NF2,LDLRAD4,CTDSP1,CBFA2T3,PRKN,PAQR3,CDKN1C,PDE2A,PDE4D,ENPP1,PFKFB1,CSK,PRKAR1A,DAB2IP,TRAF3IP1,RASSF2,PTPN1,RASIP1,PTPRR,DUSP7,DUSP8,DUSP9,RANBP9,RGS3,ACE2,EPHB2,LRRK2,MECOM,SPRED3,FBLN1,TAOK3,FBP1,ATXN1,PRKAG2,PIBF1,SFRP1,SHB,RGS14,SIRT2,CNKSR3,SORL1,PBLD,PDCD4,GRB10,RAPGEF1,C1QL4,SRCIN1,NR2F2,CORO1C,PARK7,UBE2B,SMYD3,EZR,YWHAG,IGF1R,PINK1,INSR,PMEPA1…
GO: Biological Process	GO:0043409	negative regulation of MAPK cascade		7.042E-4	1.000E0	1.315E-2	1.281E-1	34	207	AKT1,SEMA6A,BMP7,NF2,PRKN,PAQR3,CSK,DAB2IP,PTPN1,PTPRR,DUSP7,DUSP8,DUSP9,RANBP9,RGS3,ACE2,EPHB2,MECOM,SPRED3,FBLN1,TAOK3,SFRP1,RGS14,CNKSR3,SORL1,PDCD4,RAPGEF1,C1QL4,EZR,IGF1R,PINK1,CHRNA10,WNK2,SPRY4
GO: Biological Process	GO:0050773	regulation of dendrite development		7.045E-4	1.000E0	1.315E-2	1.281E-1	32	191	CSMD3,ADGRB3,BMP7,SDK1,CAMK2B,NTRK2,NEURL1,CYTH2,DNM3,RAPGEF2,CUX1,DAB2IP,PTPRS,PTPRZ1,FBXO31,EPHA4,LRRK2,CDKL3,BAIAP2,ITSN1,PPP1R9A,SHANK2,DISC1,FSTL4,CUX2,SYNE1,RAPGEF4,SRCIN1,CIT,TIAM1,SHANK3,IL1RAP
GO: Biological Process	GO:0032535	regulation of cellular component size		7.053E-4	1.000E0	1.315E-2	1.281E-1	59	418	MAP1B,CRACD,AKT1,SEMA6A,SEMA4G,SPTBN4,ARHGAP4,MYO3A,WASF1,NPHS1,CAPZB,SEMA5A,MAP3K13,CLCN6,SEMA5B,LMOD1,IQGAP3,AATK,PRKCE,CTNNA2,HP1BP3,PTPRS,ARPC1B,MEGF8,EPS8,CDKL3,FMN1,FGF13,BAIAP2,SEMA6C,SEMA3F,SEMA4F,SEMA3C,LIMA1,PPP1R9A,FHOD3,SLIT1,SPIRE2,DISC1,SPTB,FSTL4,SLC12A8,CLASP2,KANK1,CARMIL2,ATP13A2,CIT,TTL,TNR,MGLL,EZR,WNT3,WNT7B,SHANK3,SEMA3G,KCNMA1,KCNN4,LRP1,KANK4
GO: Biological Process	GO:0048017	inositol lipid-mediated signaling		7.057E-4	1.000E0	1.315E-2	1.281E-1	33	199	PIK3AP1,AKT1,MUC5AC,NTRK2,OSM,PIRT,PDGFRB,PIK3C2B,PIK3C2G,PIP4K2A,PLCB3,PLCG1,PLCG2,FBXL2,PPP2R5C,PLCH2,DAB2IP,PTAFR,OBSCN,FGFR1,PRR5,SIRT2,FYN,MYO16,GAB1,UNC5B,PIP5K1C,EZR,HTR2A,IGF1R,INSR,KCNH1,KIT
GO: Biological Process	GO:0007257	activation of JUN kinase activity		7.098E-4	1.000E0	1.320E-2	1.286E-1	13	52	MAP3K5,TNFSF11,MAP3K6,MAP3K13,DAB2IP,PTPN1,GAB1,MAP3K20,MAPK8IP3,FGD4,SYK,MAP4K1,WNT7B
GO: Biological Process	GO:0016079	synaptic vesicle exocytosis		7.169E-4	1.000E0	1.330E-2	1.296E-1	27	152	ADORA2A,VPS18,GIT1,APBA1,APBA2,PPFIA3,NAPA,CACNA1A,CACNA1D,SYT2,SYT7,DGKI,NRXN3,OTOF,SEPTIN5,ERC2,PRKCB,PRKCE,CTBP2,SNPH,GIT2,STX2,LRRK2,GRM4,PIP5K1C,HTR2A,KCNH1
GO: Biological Process	GO:0009953	dorsal/ventral pattern formation		7.201E-4	1.000E0	1.334E-2	1.299E-1	21	107	ACVR1,DSCAML1,MAP3K4,AXIN2,BMPR1B,PAX7,DLL4,SOSTDC1,TRAF3IP1,IFT172,RFX4,GSC,FGF8,SFRP1,NKX6-2,GLI2,FOXN4,WNT3,WNT8B,LMX1B,SMAD6
GO: Biological Process	GO:0031290	retinal ganglion cell axon guidance		7.283E-4	1.000E0	1.343E-2	1.309E-1	8	23	BMPR1B,PTPRM,PTPRO,EPHB1,EPHB2,EPHB3,SEMA4F,SLIT1
GO: Biological Process	GO:0051895	negative regulation of focal adhesion assembly		7.296E-4	1.000E0	1.343E-2	1.309E-1	7	18	ACVRL1,MMP14,APOD,DLC1,CLASP2,CORO1C,LRP1
GO: Biological Process	GO:0007221	positive regulation of transcription of Notch receptor target		7.296E-4	1.000E0	1.343E-2	1.309E-1	7	18	NOTCH4,PBX1,MAML3,MAML2,STAT1,WWC1,RBPJ
GO: Biological Process	GO:0035116	embryonic hindlimb morphogenesis		7.381E-4	1.000E0	1.354E-2	1.319E-1	10	34	MSX1,MECOM,FGF8,SMARCA4,GPC3,GNAS,TBX3,ALX4,WNT3,AFF3
GO: Biological Process	GO:0001964	startle response		7.381E-4	1.000E0	1.354E-2	1.319E-1	10	34	ADORA2A,NPAS1,PRKN,PENK,CTNNA2,FABP7,NPAS3,GRID2,GRIN2C,KCNH1
GO: Biological Process	GO:0060079	excitatory postsynaptic potential		7.435E-4	1.000E0	1.361E-2	1.326E-1	23	122	ADORA1,ADORA2A,AKT1,APP,TMEM108,NPAS4,IGSF11,DGKI,PRKN,SSH1,DMPK,LRRK2,ATXN1,BAIAP2,PPP1R9A,SHANK2,CUX2,SYNE1,GRID2,GRIN2C,GRIP2,SHANK3,CHRNA10
GO: Biological Process	GO:0035136	forelimb morphogenesis		7.481E-4	1.000E0	1.364E-2	1.329E-1	12	46	MSX1,CACNA1C,RUNX2,MECOM,SALL1,FMN1,TBX5,TBX3,RNF165,ALX4,HOXA9,WNT3
GO: Biological Process	GO:0035137	hindlimb morphogenesis		7.481E-4	1.000E0	1.364E-2	1.329E-1	12	46	MSX1,MECOM,SALL1,FMN1,FGF8,SMARCA4,GPC3,GNAS,TBX3,ALX4,WNT3,AFF3
GO: Biological Process	GO:0048592	eye morphogenesis		7.689E-4	1.000E0	1.400E-2	1.363E-1	31	184	MEIS1,PRDM1,BMP7,SDK1,NOTCH2,NTRK2,PITX3,CNGA3,COL8A1,COL8A2,PROX1,MFRP,CASZ1,PTPRM,DIO3,NR2E3,GRK1,EPHB1,EPHB2,IRX5,FBN2,FGFR3,ZHX2,TENM3,MEGF11,MIAT,KDM2B,GNAT1,FOXN4,TDRD7,LRP5
GO: Biological Process	GO:0032874	positive regulation of stress-activated MAPK cascade		7.720E-4	1.000E0	1.402E-2	1.366E-1	32	192	MAP3K4,MAP3K5,FZD7,SH3RF1,APP,TNFSF11,TNFRSF11A,MAP3K6,MAP3K13,DAB2IP,RASSF2,ZEB2,PTPN1,EPHA4,TAOK3,NOD1,RELL1,ANKRD6,NOX1,GAB1,MAP3K20,MAPK8IP3,FGD4,SYK,TIAM1,MAP4K1,HMGB1,HRAS,WNT7B,KARS1,LMNB1,LTBR
GO: Biological Process	GO:0061326	renal tubule development		8.174E-4	1.000E0	1.482E-2	1.444E-1	21	108	CITED1,NOTCH2,PBX1,COL4A1,MAGED1,IRX3,HS2ST1,MTSS1,FAT4,KIF26B,LGR4,SALL1,FMN1,FGF1,FGF8,GDNF,STAT1,GPC3,UMOD,WNT7B,WNT11
GO: Biological Process	GO:0010970	transport along microtubule		8.202E-4	1.000E0	1.484E-2	1.446E-1	71	527	MAP1B,MAP6,ARHGAP21,APBA1,APP,AP3B1,CDC14A,MADD,ARL3,MAPK15,TMEM108,KIF1A,BBS1,BSN,WASF1,UBXN10,ODF2,TTLL8,NEURL1,DNAAF1,EVI5L,CFAP54,TBC1D22A,SUN2,ATXN10,ONECUT2,CROCC,USP6NL,CPLANE2,IFT140,TRAF3IP1,IFT172,DCTN1,HAUS4,PURA,ULK4,DLG2,DNAH8,RFX4,LRPPRC,RHOT1,JHY,ABCC4,TBC1D2,TBC1D16,PIBF1,ABLIM3,TRAK1,DNAI1,RAB3IP,CDK5RAP2,DISC1,SEPTIN9,TTC21A,TTLL5,LCA5L,MAPK8IP3,SYNE2,ATMIN,SYNE1,SUN1,DNAI2,CCDC…
GO: Biological Process	GO:0022037	metencephalon development		8.258E-4	1.000E0	1.492E-2	1.453E-1	25	138	ARCN1,PHOX2A,NCOA1,MYH10,NEUROD2,NFIX,CDK5R2,CACNA1A,OTX1,CNTN1,PROX1,DAB1,PTPRS,SAMD4B,RFX4,ATXN2,SCN5A,ATG7,ZNF365,MYO16,GLI2,GRID2,SEZ6L,IGF1R,LMX1B
GO: Biological Process	GO:0051345	positive regulation of hydrolase activity		8.425E-4	1.000E0	1.518E-2	1.479E-1	110	886	RALGAPA1,MBP,MAP3K5,AKT1,SIPA1L2,ARHGAP21,GIT1,APP,ARHGAP4,GRHL3,MYL4,DOCK11,ADGRB3,NAPA,TNFRSF10B,ASAP2,SLC11A2,CAMK2B,NTRK2,TBC1D25,OPRD1,CD40,EVI5L,PDGFRB,ARHGAP22,TBC1D22A,PLA2G1B,PLCG1,CMKLR1,PMAIP1,ARHGEF19,POT1,RGS6,RAPGEF2,CTSD,USP6NL,CX3CR1,DAB2IP,ARHGAP24,GIT2,PTAFR,TIAM2,MAGI2,SOX7,NEK5,ARFGAP3,ARHGAP25,TNFSF15,FAM162A,IQSEC3,RGS3,EPHA4,MTSS2,APC2,LRRK2,TBC1D2,RSU1,TBC1D16,FBLN1,NOD1,D…
GO: Biological Process	GO:0003205	cardiac chamber development		8.450E-4	1.000E0	1.518E-2	1.479E-1	32	193	ACVR1,HEG1,ANK2,MYH10,NRP2,PRDM1,BMP7,NOTCH2,PDE2A,COL11A1,DLL4,EGLN1,PROX1,PTK7,ZFPM1,SALL1,SCN5A,FGF8,TAB1,FGFR2,SEMA3C,SLIT3,SMARCA4,TBX5,TBX3,NDST1,WNT11,RBPJ,SALL4,LRP1,SMAD6,SMAD7
GO: Biological Process	GO:0070304	positive regulation of stress-activated protein kinase signaling cascade		8.450E-4	1.000E0	1.518E-2	1.479E-1	32	193	MAP3K4,MAP3K5,FZD7,SH3RF1,APP,TNFSF11,TNFRSF11A,MAP3K6,MAP3K13,DAB2IP,RASSF2,ZEB2,PTPN1,EPHA4,TAOK3,NOD1,RELL1,ANKRD6,NOX1,GAB1,MAP3K20,MAPK8IP3,FGD4,SYK,TIAM1,MAP4K1,HMGB1,HRAS,WNT7B,KARS1,LMNB1,LTBR
GO: Biological Process	GO:0006816	calcium ion transport		8.538E-4	1.000E0	1.531E-2	1.491E-1	67	492	SLC24A3,TPCN1,ADORA2A,SLC24A4,REM1,ANK2,PHPT1,MYLK,CRACR2B,CACNA1I,CACNA1G,CACNA1A,CACNA1C,CACNA1D,CACNA1E,CACNA1S,CACNG1,CAMK2B,CASQ1,OPRD1,PDE2A,PDE4D,CACNA2D2,PDGFRB,AHNAK,PLA2G1B,PLCB3,PLCG1,PLCG2,SLC25A23,MCOLN2,AKAP6,PLCH2,PRKCB,PRKCE,MCUB,CACNG3,TRPM3,CCL3,RASA3,SLC8A2,SLC8A1,SLC8A3,THADA,CACNG5,FYN,FAM155B,JPH4,CDH23,CRACR2A,GRIN2C,TMBIM6,TRPC4,HPCA,FAM155A,HRH1,VDR,HTR2A,HTR2C,ITPR1,ITPR…
GO: Biological Process	GO:0021517	ventral spinal cord development		8.619E-4	1.000E0	1.542E-2	1.503E-1	13	53	PHOX2A,CACNA1A,DLL4,IFT172,DAB1,DCTN1,FOXP1,NKX6-2,GLI2,VSTM5,FOXN4,IGHMBP2,GDPD5
GO: Biological Process	GO:1903779	regulation of cardiac conduction		8.757E-4	1.000E0	1.545E-2	1.505E-1	16	73	ANK2,ATP1A1,ATP1A3,NPR1,NPR2,CASQ1,PDE4D,DMPK,ACE2,SLC8A2,SLC8A1,SLC8A3,CORIN,ITPR1,ITPR2,ITPR3
GO: Biological Process	GO:0000768	syncytium formation by plasma membrane fusion		8.757E-4	1.000E0	1.545E-2	1.505E-1	16	73	ADGRB1,ADGRB3,NFATC2,NFE2,NPHS1,CACNA1S,CD9,CD81,SH3PXD2A,PTGFRN,EHD2,FLT3LG,STAT1,TANC1,KCNH1,ADAM12
GO: Biological Process	GO:0140253	cell-cell fusion		8.757E-4	1.000E0	1.545E-2	1.505E-1	16	73	ADGRB1,ADGRB3,NFATC2,NFE2,NPHS1,CACNA1S,CD9,CD81,SH3PXD2A,PTGFRN,EHD2,FLT3LG,STAT1,TANC1,KCNH1,ADAM12
GO: Biological Process	GO:1904861	excitatory synapse assembly		8.801E-4	1.000E0	1.545E-2	1.505E-1	9	29	LRFN4,NRXN2,PTPRS,SHANK2,LRRC4,VSTM5,GRID2,SHANK3,IL1RAP
GO: Biological Process	GO:0051446	positive regulation of meiotic cell cycle		8.801E-4	1.000E0	1.545E-2	1.505E-1	9	29	MSX1,MAPK15,CAMK2B,CDC25C,DMRT1,SIRT2,UBE2B,IGF1R,INSR
GO: Biological Process	GO:0072092	ureteric bud invasion		8.804E-4	1.000E0	1.545E-2	1.505E-1	3	3	KIF26B,SALL1,FMN1
GO: Biological Process	GO:0000973	posttranscriptional tethering of RNA polymerase II gene DNA at nuclear periphery		8.804E-4	1.000E0	1.545E-2	1.505E-1	3	3	NUP98,PCID2,NUP107
GO: Biological Process	GO:0090292	nuclear matrix anchoring at nuclear membrane		8.804E-4	1.000E0	1.545E-2	1.505E-1	3	3	SUN2,SYNE1,SUN1
GO: Biological Process	GO:0021817	nucleokinesis involved in cell motility in cerebral cortex radial glia guided migration		8.804E-4	1.000E0	1.545E-2	1.505E-1	3	3	SUN2,SYNE2,SUN1
GO: Biological Process	GO:0001738	morphogenesis of a polarized epithelium		8.811E-4	1.000E0	1.545E-2	1.505E-1	27	154	FZD7,PLEKHA4,GRHL3,ROR1,BRSK2,ARHGEF19,CELSR1,TRAF3IP1,PSMA6,PSMB6,PSMB7,PTK7,MAGI2,DLG3,FAT4,GPC6,ZNRF3,GPC4,SFRP1,ANKRD6,PRICKLE2,AJAP1,GPC3,TIAM1,EZR,WNT7B,WNT11
GO: Biological Process	GO:0035567	non-canonical Wnt signaling pathway		8.811E-4	1.000E0	1.545E-2	1.505E-1	27	154	FZD7,FZD9,PLEKHA4,GRHL3,ROR1,PDE6B,PLCB3,ARHGEF19,CELSR1,PSMA6,PSMB6,PSMB7,PTK7,MAGI2,GPC6,LEF1,ZNRF3,GPC4,SFRP1,ANKRD6,PRICKLE2,AGO2,GPC3,TCF7L2,TIAM1,WNT7B,WNT11
GO: Biological Process	GO:0072028	nephron morphogenesis		8.862E-4	1.000E0	1.548E-2	1.508E-1	18	87	CITED1,BMP7,PBX1,PDGFRB,MAGED1,IRX3,HS2ST1,FAT4,KIF26B,LGR4,SALL1,FMN1,FGF1,FGF8,GDNF,STAT1,GPC3,WNT11
GO: Biological Process	GO:0008589	regulation of smoothened signaling pathway		8.862E-4	1.000E0	1.548E-2	1.508E-1	18	87	RUNX2,MOSMO,ENPP1,GPR37L1,PRRX1,IFT140,TRAF3IP1,IFT172,RFX4,MEGF8,SALL1,FGFR3,FGFR2,SFRP1,SCUBE1,GPC3,NDST1,WNT7B
GO: Biological Process	GO:0045216	cell-cell junction organization		9.127E-4	1.000E0	1.592E-2	1.551E-1	29	170	HEG1,ANK2,NF2,AJM1,PLEKHA7,SDK1,CD9,CDH1,CDH11,CDH13,PKP1,PRKCH,PTPRO,PDCD6IP,DSG2,ACE2,PATJ,HDAC7,PARD6G,NFASC,PARD6B,STRN,ABCC8,CDH22,PKP3,WNT11,KIFC3,GPBAR1,SMAD3
GO: Biological Process	GO:0031644	regulation of nervous system process		9.209E-4	1.000E0	1.600E-2	1.559E-1	30	178	ADORA1,APP,SLC25A12,TMEM108,MYRF,IGSF11,OPRD1,SHISA9,PRKN,DLGAP2,SSH1,PTAFR,DMPK,LRRK2,CCL3,FGF12,FGFR1,BAIAP2,SHANK2,CACNG5,SOX10,NMU,CUX2,SYNE1,RAPGEF4,GRIP2,TNR,MGLL,HTR2C,SHANK3
GO: Biological Process	GO:0035850	epithelial cell differentiation involved in kidney development		9.211E-4	1.000E0	1.600E-2	1.559E-1	12	47	CITED1,MYO1E,NOTCH2,NPHS1,PODXL,MTSS1,MAGI2,PTPRO,FAT4,SALL1,GDNF,STAT1
GO: Biological Process	GO:0010990	regulation of SMAD protein complex assembly		9.403E-4	1.000E0	1.631E-2	1.589E-1	4	6	PARP1,LDLRAD4,PMEPA1,SMAD6
GO: Biological Process	GO:1902065	response to L-glutamate		9.716E-4	1.000E0	1.682E-2	1.639E-1	6	14	PRKN,BAIAP2,FYN,TMBIM6,HPCA,IGF1R
GO: Biological Process	GO:0098693	regulation of synaptic vesicle cycle		9.748E-4	1.000E0	1.685E-2	1.641E-1	27	155	BTBD9,ADORA2A,SCAMP5,VPS18,GIT1,APBA1,APBA2,NAPA,BSN,CACNA1D,BRSK2,SYT2,SYT7,DGKI,NRXN3,SEPTIN5,DNM3,PRKCB,PRKCE,GIT2,MAGI2,LRRK2,RAPGEF4,GRM4,PIP5K1C,HTR2A,KCNH1
GO: Biological Process	GO:0001736	establishment of planar polarity		9.853E-4	1.000E0	1.699E-2	1.656E-1	24	132	FZD7,PLEKHA4,GRHL3,ROR1,BRSK2,ARHGEF19,CELSR1,PSMA6,PSMB6,PSMB7,PTK7,MAGI2,DLG3,FAT4,GPC6,ZNRF3,GPC4,SFRP1,ANKRD6,PRICKLE2,GPC3,TIAM1,WNT7B,WNT11
GO: Biological Process	GO:0030879	mammary gland development		9.923E-4	1.000E0	1.708E-2	1.664E-1	28	163	AKT1,MSX1,TNFSF11,NCOA1,MTX1,TNFRSF11A,NOTCH4,OXTR,NEURL1,IQGAP3,SOSTDC1,NCOR2,CSN3,ELF5,LEF1,ETV4,ETV5,FGFR2,ZNF703,GLI2,TBX3,HOXA9,VDR,WNT3,WNT7B,IGF1R,LBH,LRP5
GO: Biological Process	GO:0006023	aminoglycan biosynthetic process		9.936E-4	1.000E0	1.708E-2	1.664E-1	22	117	HS6ST2,B4GALT4,BGN,PDGFRB,B4GALT5,HS6ST1,CHST11,HS2ST1,CSPG4,CHST9,HS3ST3B1,HS3ST3A1,CHPF,GPC6,EXT1,GPC4,GPC5,ST3GAL3,XYLT1,GPC3,B3GNT9,NDST1
GO: Biological Process	GO:0030509	BMP signaling pathway		1.004E-3	1.000E0	1.720E-2	1.676E-1	29	171	ACVR1,ACVRL1,MSX1,BMP7,BMPR1B,NOTCH2,NUMA1,RUNX2,HJV,SOSTDC1,HTRA1,FAM83G,MEGF8,LEF1,FGF8,SFRP1,SORL1,ZNF423,PDCD4,GPC3,TBXT,TCF7L2,KCP,RNF165,RBPJ,CRB2,HTRA3,SMAD6,SMAD7
GO: Biological Process	GO:0099171	presynaptic modulation of chemical synaptic transmission		1.005E-3	1.000E0	1.720E-2	1.676E-1	8	24	GIT1,CACNA1D,SYT2,SYT7,SEPTIN5,PRKCB,GIT2,RPL22
GO: Biological Process	GO:0014032	neural crest cell development		1.019E-3	1.000E0	1.743E-2	1.698E-1	18	88	ACVR1,SEMA6A,SEMA4G,NRP2,BMP7,CYP26C1,SEMA5A,SEMA5B,ZEB2,SEMA6C,SEMA3F,SEMA4F,SEMA3C,SOX10,KBTBD8,GDNF,CORO1C,SEMA3G
GO: Biological Process	GO:0048706	embryonic skeletal system development		1.024E-3	1.000E0	1.747E-2	1.702E-1	25	140	DSCAML1,MMP14,BMP7,RUNX2,PAX7,PBX1,PRRX1,COL11A1,SLC39A3,CHST11,IFT140,GSC,MEGF8,IRX5,EXT1,FGFR2,XYLT1,SULF2,TBXT,GNAS,ALX4,HOXA9,NDST1,WNT11,SMAD3
GO: Biological Process	GO:2001222	regulation of neuron migration		1.040E-3	1.000E0	1.772E-2	1.727E-1	13	54	SEMA6A,NEXMIF,CAMK2B,CDH1,CTNNA2,RAPGEF2,DAB2IP,SCRT1,PTPRZ1,ULK4,FBXO31,ZNF609,MAPK8IP3
GO: Biological Process	GO:0043473	pigmentation		1.046E-3	1.000E0	1.779E-2	1.734E-1	21	110	SHROOM3,CITED1,AP3B1,ARCN1,AP1M1,ENPP1,DCTN1,ZEB2,EDA,ATP6AP2,SLC45A2,LRMDA,LEF1,ADAMTS20,SOX10,SPARC,SZT2,MFSD12,ADAMTS9,HPS4,KIT
GO: Biological Process	GO:0001933	negative regulation of protein phosphorylation		1.050E-3	1.000E0	1.781E-2	1.735E-1	65	478	ADORA2A,HEG1,AKT1,SEMA6A,TRIB2,PLPP3,BMP7,NF2,LDLRAD4,CTDSP1,PRKN,PAQR3,CDKN1C,PDE4D,ENPP1,CSK,PRKAR1A,DAB2IP,TRAF3IP1,RASSF2,PTPN1,RASIP1,PTPRR,DUSP7,DUSP8,DUSP9,RANBP9,RGS3,ACE2,EPHB2,LRRK2,MECOM,SPRED3,FBLN1,TAOK3,PRKAG2,PIBF1,SFRP1,SHB,RGS14,SIRT2,CNKSR3,SORL1,PBLD,PDCD4,RAPGEF1,C1QL4,SRCIN1,NR2F2,CORO1C,PARK7,UBE2B,SMYD3,EZR,YWHAG,IGF1R,PINK1,INSR,PMEPA1,CHRNA10,WNK2,SPRY4,LRP5,SMAD6,SMAD7
GO: Biological Process	GO:0030705	cytoskeleton-dependent intracellular transport		1.060E-3	1.000E0	1.796E-2	1.750E-1	72	541	MAP1B,MAP6,ARHGAP21,APBA1,APP,AP3B1,CDC14A,MADD,ARL3,MAPK15,TMEM108,KIF1A,MYO10,BBS1,BSN,WASF1,UBXN10,ODF2,TTLL8,NEURL1,DNAAF1,EVI5L,CFAP54,TBC1D22A,SUN2,ATXN10,ONECUT2,CROCC,USP6NL,CPLANE2,IFT140,TRAF3IP1,IFT172,DCTN1,HAUS4,PURA,ULK4,DLG2,DNAH8,RFX4,LRPPRC,RHOT1,JHY,ABCC4,TBC1D2,TBC1D16,PIBF1,ABLIM3,TRAK1,DNAI1,RAB3IP,CDK5RAP2,DISC1,SEPTIN9,TTC21A,TTLL5,LCA5L,MAPK8IP3,SYNE2,ATMIN,SYNE1,SUN1,DNAI…
GO: Biological Process	GO:0022038	corpus callosum development		1.063E-3	1.000E0	1.799E-2	1.752E-1	7	19	ZEB2,PTPRS,ULK4,EPHB2,EPHB3,SZT2,RTN4RL1
GO: Biological Process	GO:0007164	establishment of tissue polarity		1.099E-3	1.000E0	1.855E-2	1.807E-1	24	133	FZD7,PLEKHA4,GRHL3,ROR1,BRSK2,ARHGEF19,CELSR1,PSMA6,PSMB6,PSMB7,PTK7,MAGI2,DLG3,FAT4,GPC6,ZNRF3,GPC4,SFRP1,ANKRD6,PRICKLE2,GPC3,TIAM1,WNT7B,WNT11
GO: Biological Process	GO:0060840	artery development		1.117E-3	1.000E0	1.879E-2	1.831E-1	22	118	ACVRL1,MYH10,MYLK,PRDM1,NOTCH4,PDE2A,PDGFRB,PRRX1,DLL4,PROX1,EFNB2,FGF8,TAB1,SMARCA4,NDST1,WNT11,RBPJ,ADAMTS9,LOXL1,LRP1,SMAD6,SMAD7
GO: Biological Process	GO:0006874	cellular calcium ion homeostasis		1.117E-3	1.000E0	1.879E-2	1.831E-1	70	524	SLC24A3,TPCN1,ADORA1,FZD9,SLC24A4,ANK2,APP,CACNA1I,CACNA1G,CACNA1A,CACNA1C,CACNA1D,CACNA1E,CASQ1,OXTR,CD40,PDE4D,PDE6B,PLA2G1B,PLCB3,PLCG1,CMKLR1,PLCG2,SLC25A23,MCOLN2,AKAP6,PLCH2,PRKCB,PRKCE,CX3CR1,DMPK,MCUB,CCL1,CCL3,CIB2,RASA3,CLSTN1,SLC8A2,SLC8A1,SLC8A3,THADA,FYN,FAM155B,JPH4,DISC1,CDH23,NMU,GHRH,GOT1,GRIN2C,TMBIM6,ATP13A2,HRH3,TRPC4,HMGB1,FAM155A,VDR,HTR2A,HTR2C,ITPR1,ITPR2,ITPR3,KCNA5,KCNH1…
GO: Biological Process	GO:0090129	positive regulation of synapse maturation		1.142E-3	1.000E0	1.911E-2	1.861E-1	5	10	NEUROD2,CAMK2B,NEURL1,DAB2IP,ADGRL1
GO: Biological Process	GO:1990535	neuron projection maintenance		1.142E-3	1.000E0	1.911E-2	1.861E-1	5	10	ABCD1,APP,ATP1A3,DCTN1,INSR
GO: Biological Process	GO:0086070	SA node cell to atrial cardiac muscle cell communication		1.142E-3	1.000E0	1.911E-2	1.861E-1	5	10	ANK2,CACNA1G,CACNA1D,SCN5A,KCNA5
GO: Biological Process	GO:0051247	positive regulation of protein metabolic process		1.147E-3	1.000E0	1.915E-2	1.866E-1	212	1882	MBP,ACVR1,ACVRL1,ADCY9,MAP3K4,AXIN2,MAP3K5,FZD7,ADORA1,ADORA2A,ATXN3,AKT1,MMP14,TRIB2,SH3RF1,PIK3R3,DGKE,APP,ARAF,MADD,TNFSF11,MAPK15,PLPP3,RAP2C,MUC1,MARCO,TNFRSF11A,TNFRSF10B,KSR1,BMP7,NFE2,NFE2L2,BRAT1,CDK5R2,NOTCH2,SLC11A2,NSF,NTRK2,KSR2,CBFA2T3,MAP3K6,OPRD1,OSM,SH3D19,NEURL1,CD40,DGKI,PRKN,CD81,MAP3K13,PAX7,CRLF1,PDGFRB,ENPP2,GPR37L1,CARD10,KPNA7,TMEM259,DSTYK,PLA2G1B,IQGAP3,CARD14,PMAIP1,CN…
GO: Biological Process	GO:0030318	melanocyte differentiation		1.155E-3	1.000E0	1.926E-2	1.877E-1	9	30	CITED1,ENPP1,ZEB2,LRMDA,ADAMTS20,SOX10,ADAMTS9,HPS4,KIT
GO: Biological Process	GO:0031346	positive regulation of cell projection organization		1.168E-3	1.000E0	1.945E-2	1.894E-1	65	480	MAP1B,MAP6,TENM2,RNF157,ENC1,CPNE5,SCARF1,DOCK11,BMP7,MYO3A,NFE2L2,CAMK2B,NTRK2,SEMA5A,SYT2,NEURL1,PRKN,MAP3K13,ENPP2,PLXNA1,CNTN1,ITSN2,DNM3,AUTS2,RAPGEF2,CROCC,CUX1,DAB2IP,ZEB2,PTK7,MAGI2,PTPRZ1,MEGF8,FBXO31,EPHA4,EPS8,CDKL3,FGFR1,BAIAP2,ITSN1,PPP1R9A,TRAK1,SHANK2,TENM3,ANKRD1,FYN,DISC1,SEPTIN9,ATMIN,ACSL6,CUX2,CARMIL2,RAPGEF1,GRIP1,TIAM1,CORO1C,HRAS,WNT3,SHANK3,IGF1R,IL1RAP,ITPR1,KIT,LRP1,SF3A2
GO: Biological Process	GO:0060997	dendritic spine morphogenesis		1.170E-3	1.000E0	1.945E-2	1.894E-1	15	68	CAMK2B,DNM3,EPHA4,EPHB1,EPHB2,EPHB3,LRRK2,BAIAP2,PPP1R9A,ZNF365,SHANK2,CUX2,SRCIN1,TIAM1,SHANK3
GO: Biological Process	GO:0051783	regulation of nuclear division		1.174E-3	1.000E0	1.947E-2	1.897E-1	34	213	SMC1A,CDC14A,MSX1,MAPK15,TNKS,BMP7,CAMK2B,NUMA1,OSM,CDC25C,CDKN1C,PDGFRB,RCC1,MAD2L1BP,CHMP2B,PRKAR1A,DMRT1,PDCD6IP,DYNC1LI1,STAG1,FGF8,FGFR3,FGFR2,SIRT2,CDK5RAP2,STAG2,PCID2,CUL9,CIT,TUBG1,UBE2B,IGF1R,INSR,LRP5
GO: Biological Process	GO:0021549	cerebellum development		1.176E-3	1.000E0	1.947E-2	1.897E-1	23	126	ARCN1,NCOA1,MYH10,NEUROD2,NFIX,CDK5R2,CACNA1A,CNTN1,PROX1,DAB1,PTPRS,SAMD4B,RFX4,ATXN2,SCN5A,ATG7,ZNF365,MYO16,GLI2,GRID2,SEZ6L,IGF1R,LMX1B
GO: Biological Process	GO:0010453	regulation of cell fate commitment		1.188E-3	1.000E0	1.958E-2	1.908E-1	11	42	FZD7,PAX7,SPDEF,TBX21,SOSTDC1,GLIS1,CASZ1,FGFR1,NKX6-2,RBPJ,IL12RB1
GO: Biological Process	GO:0060411	cardiac septum morphogenesis		1.189E-3	1.000E0	1.958E-2	1.908E-1	17	82	ACVR1,NRP2,BMP7,NOTCH2,EGLN1,PROX1,ZFPM1,FGF8,FGFR2,SEMA3C,SLIT3,TBX5,TBX3,WNT11,RBPJ,SMAD6,SMAD7
GO: Biological Process	GO:0021872	forebrain generation of neurons		1.189E-3	1.000E0	1.958E-2	1.908E-1	17	82	UNCX,NRP2,RAPGEF2,PROX1,FEZF2,LEF1,SALL1,FGF8,FGFR1,FGFR2,ATG7,SLIT1,SLIT3,DISC1,AKNA,SHANK3,BCL11B
GO: Biological Process	GO:0017145	stem cell division		1.211E-3	1.000E0	1.991E-2	1.940E-1	29	173	FZD7,FZD9,CITED1,NF2,NFYA,CX3CR1,LEF1,ESRRB,LRRK2,ETV5,MECOM,FBLN1,ZNRF3,FGF13,FGFR1,FGFR2,SHB,DMRTA2,SOX5,SOX10,DISC1,ACSL6,TBX3,AKNA,WNT3,WNT7B,LBH,KIT,HMGA2
GO: Biological Process	GO:0072080	nephron tubule development		1.240E-3	1.000E0	2.036E-2	1.984E-1	20	104	CITED1,NOTCH2,PBX1,MAGED1,IRX3,HS2ST1,MTSS1,FAT4,KIF26B,LGR4,SALL1,FMN1,FGF1,FGF8,GDNF,STAT1,GPC3,UMOD,WNT7B,WNT11
GO: Biological Process	GO:0042060	wound healing		1.243E-3	1.000E0	2.037E-2	1.984E-1	80	617	MCAM,ACTG1,ACVRL1,MAP3K5,FZD7,FZD9,ADORA2A,DGKE,APOD,AP3B1,C1GALT1C1,PLPP3,GRHL3,MYH10,MYLK,DOCK11,NFE2,NFE2L2,NOTCH2,NOTCH4,CAPZB,SYT7,CD9,CD40,DGKI,CD81,CD151,PAX7,LARGE1,PDGFRB,PLCG2,ARHGEF19,DUOX2,CELSR1,PRKAR1A,PRKCB,PRKCE,PRKCH,KLK6,ARHGAP24,DGKG,JAML,PTGFRN,PTK7,RAD51B,HBEGF,LGR6,ZFPM1,EHD2,FBLN1,FCER1G,FGFR2,SRSF6,SCUBE1,FYN,SPARC,CLASP2,SMOC2,KANK1,AJAP1,ABCC8,NBEAL2,SYK,GNAS,GP1BB,CARMI…
GO: Biological Process	GO:0007157	heterophilic cell-cell adhesion via plasma membrane cell adhesion molecules		1.249E-3	1.000E0	2.040E-2	1.987E-1	13	55	MCAM,TENM2,CADM3,JAML,FAT4,ADGRL1,TENM3,GRID2,IGSF21,CADM1,UMOD,CRB2,ITGA5
GO: Biological Process	GO:0048066	developmental pigmentation		1.249E-3	1.000E0	2.040E-2	1.987E-1	13	55	CITED1,AP1M1,ENPP1,ZEB2,ATP6AP2,SLC45A2,LRMDA,LEF1,ADAMTS20,SOX10,ADAMTS9,HPS4,KIT
GO: Biological Process	GO:0014070	response to organic cyclic compound		1.253E-3	1.000E0	2.044E-2	1.991E-1	128	1067	ABCA2,ACACB,MAP1B,ACTA1,ADA,GRAMD1B,ADORA2A,PARP1,AKT1,MMP14,MMP15,CITED1,APP,MAPK15,ASS1,NCOA1,ATP1A1,ATP1A3,CATSPERG,NPAS4,FCSK,BMP7,KLF9,SDK1,CACNA1S,NTRK2,NR4A2,OPRD1,OXTR,PRKN,HTR3B,CDH1,PDE2A,PDE4D,PDGFRB,PENK,PFKFB1,CHRM3,TRIP4,SSH1,PITX3,DDX54,PLCG2,CNGA3,PMAIP1,AKAP6,PTGES,DUOX2,CPN1,NCOR2,PRKCE,RAPGEF2,PTAFR,ARNT2,DPYD,NR2E3,DSG2,ARPC1B,KLF16,ELK1,LEF1,ABCC4,ESRRB,ESRRG,LRRK2,RXRB,ZBTB7…
GO: Biological Process	GO:0008284	positive regulation of cell population proliferation		1.268E-3	1.000E0	2.064E-2	2.011E-1	131	1096	ACVRL1,ADA,MEIS2,MAP3K5,FZD7,FZD9,MTA3,AKT1,SLC25A5,CITED1,MAPK15,TNFRSF11A,NRP2,NFATC2,NFYA,NOTCH2,NTRK2,SEMA5A,RUNX2,OSM,CD40,CD81,PAX7,PBX1,CDH13,CRLF1,PDGFRB,ENPP2,GPR37L1,RPRD1B,PITX3,PLA2G1B,PLCG1,IQGAP3,CNTFR,PRRX1,DLL4,PRKCH,MAP2K5,CX3CR1,PROX1,HMGN5,HTRA1,PTAFR,JAML,RASIP1,PTPRZ1,PURA,ARNT2,DNMT1,RAD51B,DPP4,HBEGF,LIN28A,EFNB2,IRAK4,LEF1,ABCC4,ETV5,RSU1,LRG1,FBLN1,ATXN1,SCN5A,FGF1,FGF8,F…
GO: Biological Process	GO:0008285	negative regulation of cell population proliferation		1.276E-3	1.000E0	2.074E-2	2.020E-1	106	859	ACVRL1,MEIS1,AXIN2,ADORA1,ADORA2A,FOXO4,MNT,APOD,APP,MSX1,ADGRB1,PRDM1,BMP7,BMPR1B,NF2,NFE2,NFIB,KLF9,NPR1,ZBTB7C,CBFA2T3,OSM,CD9,NEURL1,CDH1,CDH13,CDKN1C,PMAIP1,MAGED1,DLL4,EEF1E1,PTGES,PPP2R5C,CSK,CHD5,PRKAR1A,CTBP2,RAPGEF2,PROX1,DAB2IP,IFT172,MTSS1,MAGI2,SOX7,PTPN14,PTPRM,PTPRZ1,DLG3,NR2E3,FEZF2,ACE2,EFNB2,CLMN,BNIPL,DHRS2,EPHB1,SPEG,RPS6KA2,ETV4,FABP7,FBLN1,DLC1,FGFR3,FGFR2,SFRP1,SIRT2,KLF13,…
GO: Biological Process	GO:0046683	response to organophosphorus		1.290E-3	1.000E0	2.089E-2	2.035E-1	26	150	CITED1,APP,ASS1,PDE2A,PENK,PFKFB1,SSH1,PLCG2,CNGA3,AKAP6,DUOX2,RAPGEF2,PTAFR,CIB2,SLC5A5,SLC8A1,SLC8A3,SPARC,SREBF1,STAT1,RAPGEF1,EZR,ITPR1,ITPR2,ITPR3,KCNQ1
GO: Biological Process	GO:0046717	acid secretion		1.290E-3	1.000E0	2.089E-2	2.035E-1	26	150	ADORA1,ADORA2A,PPFIA4,APBA1,PPFIA3,TNFSF11,ABCC3,TNFRSF11A,CACNA1A,NTRK2,OXTR,PLA2G1B,MAP2K6,ABCC4,ACSL4,SLC1A2,SLC1A3,SLC1A5,SLC6A1,SLC6A9,NMU,SYK,HRH3,TRPC4,HTR2C,KCNQ1
GO: Biological Process	GO:0071417	cellular response to organonitrogen compound		1.309E-3	1.000E0	2.114E-2	2.060E-1	89	701	MAP1B,ACTA1,ADCY9,PARP1,ARID1B,AKT1,FOXO4,IRS4,PIK3R3,APP,ASS1,ATP1A3,NFE2L2,VWA2,CACNA1A,CACNA1S,ATP6V0E1,NTRK2,NR4A2,OPRD1,NEURL1,PRKN,HTR3B,CDH1,PDE2A,PDE4D,ENPP1,PENK,CHRM3,SSH1,PLA2G1B,AKAP6,COL4A1,COL16A1,BCAR1,CSK,PRKAR1A,PRKCB,RAPGEF2,PTAFR,PTPN1,PCSK9,DNMT1,KLF16,OTOP1,EPHA4,LRRK2,NOD1,BAIAP2,CIB2,SFRP1,ATG7,SLC5A5,DNAI1,SLC8A1,SLC8A3,SIRT2,FYN,GAB1,SORL1,GABRB1,SREBF1,STAT1,LPIN1,KANK1,…
GO: Biological Process	GO:0014013	regulation of gliogenesis		1.310E-3	1.000E0	2.114E-2	2.060E-1	27	158	NF2,ENPP2,GPR37L1,PITX3,PRKCH,KDM4A,CX3CR1,DAB1,PTPRZ1,LIN28A,EPHA4,ETV5,ATXN1,CCL3,FGFR3,ZNF365,SIRT2,ZCCHC24,SOX10,NKX6-2,ABCC8,TCF7L2,TIAM1,RNF112,BMERB1,HMGA2,LRP1
GO: Biological Process	GO:0043583	ear development		1.329E-3	1.000E0	2.134E-2	2.079E-1	39	256	MSX1,GRHL3,MYO3A,ROR1,OTX1,CDH1,PDGFRB,PRRX1,COL11A1,DUOX2,CELSR1,CUX1,PROX1,PTK7,FAT4,SOBP,ECE1,GSC,OTOP1,EPHA4,EPHB2,ESRRB,PDZD7,SALL1,FGF8,FGFR1,FGFR3,FGFR2,SPARC,GJB6,CDH23,GLI2,TSHR,HPCA,USH2A,RBPJ,KCNMA1,KCNQ1,CHRNA10
GO: Biological Process	GO:0060071	Wnt signaling pathway, planar cell polarity pathway		1.329E-3	1.000E0	2.134E-2	2.079E-1	21	112	FZD7,PLEKHA4,GRHL3,ROR1,ARHGEF19,CELSR1,PSMA6,PSMB6,PSMB7,PTK7,MAGI2,GPC6,ZNRF3,GPC4,SFRP1,ANKRD6,PRICKLE2,GPC3,TIAM1,WNT7B,WNT11
GO: Biological Process	GO:0006024	glycosaminoglycan biosynthetic process		1.329E-3	1.000E0	2.134E-2	2.079E-1	21	112	HS6ST2,B4GALT4,BGN,PDGFRB,B4GALT5,HS6ST1,CHST11,HS2ST1,CSPG4,CHST9,HS3ST3B1,HS3ST3A1,CHPF,GPC6,EXT1,GPC4,GPC5,ST3GAL3,XYLT1,GPC3,NDST1
GO: Biological Process	GO:0070373	negative regulation of ERK1 and ERK2 cascade		1.368E-3	1.000E0	2.192E-2	2.135E-1	17	83	SEMA6A,CSK,DAB2IP,PTPN1,PTPRR,RANBP9,ACE2,EPHB2,FBLN1,RGS14,CNKSR3,RAPGEF1,C1QL4,EZR,CHRNA10,WNK2,SPRY4
GO: Biological Process	GO:0021879	forebrain neuron differentiation		1.369E-3	1.000E0	2.192E-2	2.135E-1	15	69	UNCX,NRP2,RAPGEF2,PROX1,FEZF2,SALL1,FGF8,FGFR1,FGFR2,ATG7,SLIT1,SLIT3,DISC1,SHANK3,BCL11B
GO: Biological Process	GO:0006949	syncytium formation		1.381E-3	1.000E0	2.206E-2	2.150E-1	16	76	ADGRB1,ADGRB3,NFATC2,NFE2,NPHS1,CACNA1S,CD9,CD81,SH3PXD2A,PTGFRN,EHD2,FLT3LG,STAT1,TANC1,KCNH1,ADAM12
GO: Biological Process	GO:0080135	regulation of cellular response to stress		1.432E-3	1.000E0	2.285E-2	2.226E-1	101	815	MAP3K4,AXIN2,MAP3K5,FZD7,PARP1,ATXN3,AKT1,ABCD1,SH3RF1,FIGNL2,APP,SCARF1,MSX1,TNFSF11,MUC1,TNFRSF11A,BMP7,NFE2L2,NSMCE1,NPAS2,CAMK2B,BRSK2,NUP98,MAP3K6,PRKN,MAP3K13,GPR37L1,TMEM259,SLC25A23,PMAIP1,PRRX1,UBQLN2,EEF1E1,RWDD3,DAB2IP,RASSF2,ZEB2,PTPN1,NUAK1,PTPRS,ULK4,WDR70,RNFT1,EPHA4,EPHB1,LRRK2,MECOM,EYA2,SPRED3,TAOK3,NOD1,RELL1,SFRP1,ATG7,SGTA,SCLY,ANKRD6,ZNF365,ATF6,NDC1,NOX1,ANKRD1,FOXP1,FYN,GA…
GO: Biological Process	GO:0043467	regulation of generation of precursor metabolites and energy		1.453E-3	1.000E0	2.315E-2	2.255E-1	29	175	AK4,AKT1,ABCD1,APP,SLC25A12,NUP98,CBFA2T3,PDE2A,ENPP1,PFKFB1,SLC25A23,PRKAG1,ZBTB20,ESRRB,ZBTB7A,FBP1,PRKAG2,UQCC2,NDC1,PRDM16,NUP50,CISD1,GRB10,PARK7,HMGB1,HTR2A,PINK1,INSR,NUP107
GO: Biological Process	GO:0051480	regulation of cytosolic calcium ion concentration		1.466E-3	1.000E0	2.330E-2	2.270E-1	57	413	TPCN1,ADORA1,FZD9,ANK2,CACNA1I,CACNA1G,CACNA1A,CACNA1C,CACNA1D,CACNA1E,CASQ1,OXTR,PDE4D,PDE6B,PLA2G1B,PLCB3,PLCG1,CMKLR1,PLCG2,MCOLN2,AKAP6,PLCH2,PRKCE,CX3CR1,CCL1,CCL3,CIB2,RASA3,SLC8A2,SLC8A1,SLC8A3,FYN,FAM155B,JPH4,CDH23,NMU,GHRH,GOT1,GRIN2C,TMBIM6,HRH3,TRPC4,HMGB1,FAM155A,HTR2A,HTR2C,ITPR1,ITPR2,ITPR3,KCNA5,KCNH1,CHRNA10,TRPC7,JPH2,LRP1,SMAD3,JPH3
GO: Biological Process	GO:0098815	modulation of excitatory postsynaptic potential		1.491E-3	1.000E0	2.366E-2	2.305E-1	13	56	APP,TMEM108,IGSF11,PRKN,SSH1,DMPK,LRRK2,BAIAP2,SHANK2,CUX2,SYNE1,GRIP2,SHANK3
GO: Biological Process	GO:0035641	locomotory exploration behavior		1.493E-3	1.000E0	2.366E-2	2.305E-1	6	15	PENK,PRKCE,DPP4,LRRK2,TNR,SHANK3
GO: Biological Process	GO:0008361	regulation of cell size		1.499E-3	1.000E0	2.371E-2	2.310E-1	34	216	MAP1B,AKT1,SEMA6A,SEMA4G,ARHGAP4,SEMA5A,MAP3K13,CLCN6,SEMA5B,IQGAP3,AATK,PTPRS,MEGF8,CDKL3,FGF13,SEMA6C,SEMA3F,SEMA4F,SEMA3C,SLIT1,DISC1,FSTL4,SLC12A8,CLASP2,TTL,TNR,MGLL,EZR,WNT3,SHANK3,SEMA3G,KCNMA1,KCNN4,LRP1
GO: Biological Process	GO:0048593	camera-type eye morphogenesis		1.510E-3	1.000E0	2.385E-2	2.323E-1	24	136	MEIS1,BMP7,SDK1,NOTCH2,PITX3,CNGA3,COL8A1,COL8A2,PROX1,CASZ1,PTPRM,DIO3,GRK1,EPHB1,EPHB2,IRX5,FGFR3,ZHX2,TENM3,MEGF11,KDM2B,FOXN4,TDRD7,LRP5
GO: Biological Process	GO:0072657	protein localization to membrane		1.523E-3	1.000E0	2.401E-2	2.339E-1	87	686	ABHD17A,ADORA1,FZD9,AKT1,MMP14,ANK1,ANK2,ANK3,GIT1,SPTBN4,ARL3,SKAP1,LRRC15,BBS1,NMT1,CACNA1A,NSF,CAMK2B,MAP7,PRKN,CD81,CDH1,LGI1,PDZK1,SSH1,NRXN2,PMAIP1,NECAB2,CSK,PRKCE,PRKCH,RAPGEF2,CNIH3,MAGI2,DLG2,DLG3,DPP6,ZDHHC14,GPC6,VPS37B,TSPAN5,ZDHHC9,RPL8,EPHB2,RPL22,ETV5,KCNIP3,GPR179,EHD2,CACNG3,FCER1G,GPC4,FGF13,GPC5,SGTA,RAB11FIP2,CLSTN1,RAB3IP,CACNG5,FYN,IQSEC2,NFASC,CLASP2,LRRC4,ARHGEF16,GPC3,MT…
GO: Biological Process	GO:0042552	myelination		1.570E-3	1.000E0	2.466E-2	2.402E-1	26	152	MBP,AKT1,ABCD1,ANK2,BCAS1,SLC25A12,ZPR1,MYRF,NTRK2,CD9,B4GALT5,GAL3ST1,KLK6,PTPRZ1,RXRB,SCN8A,FGFR3,SLC8A3,SIRT2,FYN,SOX10,NKX6-2,NFASC,TCF7L2,ITGB4,MALL
GO: Biological Process	GO:0061180	mammary gland epithelium development		1.570E-3	1.000E0	2.466E-2	2.402E-1	17	84	AKT1,MSX1,TNFSF11,IQGAP3,SOSTDC1,ELF5,ETV4,ETV5,FGFR2,ZNF703,GLI2,TBX3,VDR,WNT3,WNT7B,LBH,LRP5
GO: Biological Process	GO:0040013	negative regulation of locomotion		1.572E-3	1.000E0	2.466E-2	2.402E-1	59	432	ACVRL1,ADA,ADORA1,ADORA2A,AKT1,SEMA6A,APOD,SEMA4G,ARHGAP4,MAPK15,RAP2C,NEXMIF,ADGRB1,NF2,NFE2L2,LDLRAD4,SEMA5A,CDH1,CARD10,SEMA5B,DLL4,MMP28,MAP2K5,CX3CR1,DAB2IP,MAGI2,PTPRM,PTPRO,PTPRR,FBLN1,DLC1,SEMA6C,SEMA3F,SEMA4F,SEMA3C,SFRP1,ST6GAL1,SLIT1,LIMCH1,STK26,PBLD,CLASP2,KANK1,ABCC8,TBX5,NR2F2,NISCH,RNF20,CORO1C,HMGB1,HTR2C,WNT3,WNT11,RBPJ,SEMA3G,ADAMTS9,BMERB1,LRP1,SMAD7
GO: Biological Process	GO:0048545	response to steroid hormone		1.626E-3	1.000E0	2.548E-2	2.482E-1	56	406	ABCA2,ACTA1,PARP1,ASS1,NCOA1,ATP1A1,ATP1A3,CATSPERG,NPAS4,BMP7,KLF9,NTRK2,NR4A2,OXTR,PFKFB1,TRIP4,DDX54,CNGA3,CPN1,NCOR2,PTAFR,NR2E3,DSG2,LEF1,ESRRB,ESRRG,RXRB,ZBTB7A,SFRP1,SLIT3,TPH2,SMARCA4,FOXP1,NR5A1,GABRB1,SOX10,SPARC,SREBF1,GDNF,GOT1,NR2F1,NR2F2,GRIP1,THRA,AKAP13,CATSPERD,PARK7,HMGB1,NR1H2,SMYD3,VDR,WNT7B,PMEPA1,KCNMA1,LBH,HMGA2
GO: Biological Process	GO:0002064	epithelial cell development		1.652E-3	1.000E0	2.584E-2	2.518E-1	39	259	HEG1,SHROOM3,EPB41L5,RAP2C,MYO1E,PRDM1,MYO3A,NOTCH2,NOTCH4,NPHS1,MAP7,CDH1,PDE2A,PDE4D,NUP210L,TJP2,SPDEF,ONECUT2,PODXL,RAPGEF2,PROX1,MAGI2,PTPRS,DMRT1,SIDT2,PDZD7,FGFR1,FGFR3,FGFR2,SMARCA4,SOX3,CDH23,RAPGEF1,EZR,WNT7B,BCL11B,C1GALT1,YIPF6,JMJD1C
GO: Biological Process	GO:0090175	regulation of establishment of planar polarity		1.673E-3	1.000E0	2.613E-2	2.545E-1	21	114	FZD7,PLEKHA4,GRHL3,ROR1,ARHGEF19,CELSR1,PSMA6,PSMB6,PSMB7,PTK7,MAGI2,GPC6,ZNRF3,GPC4,SFRP1,ANKRD6,PRICKLE2,GPC3,TIAM1,WNT7B,WNT11
GO: Biological Process	GO:0048839	inner ear development		1.716E-3	1.000E0	2.675E-2	2.606E-1	35	226	GRHL3,MYO3A,ROR1,OTX1,CDH1,PDGFRB,PRRX1,COL11A1,DUOX2,CELSR1,CUX1,PROX1,PTK7,FAT4,SOBP,OTOP1,EPHA4,EPHB2,ESRRB,PDZD7,FGF8,FGFR1,FGFR3,FGFR2,SPARC,GJB6,CDH23,GLI2,TSHR,HPCA,USH2A,RBPJ,KCNMA1,KCNQ1,CHRNA10
GO: Biological Process	GO:0071772	response to BMP		1.724E-3	1.000E0	2.679E-2	2.610E-1	30	185	ACVR1,ACVRL1,MSX1,BMP7,BMPR1B,NOTCH2,NUMA1,RUNX2,HJV,SOSTDC1,HTRA1,FAM83G,MEGF8,LEF1,FGF8,SFRP1,SORL1,ZNF423,PDCD4,GPC3,TBXT,TCF7L2,KCP,RNF165,RBPJ,CRB2,KCND3,HTRA3,SMAD6,SMAD7
GO: Biological Process	GO:0071773	cellular response to BMP stimulus		1.724E-3	1.000E0	2.679E-2	2.610E-1	30	185	ACVR1,ACVRL1,MSX1,BMP7,BMPR1B,NOTCH2,NUMA1,RUNX2,HJV,SOSTDC1,HTRA1,FAM83G,MEGF8,LEF1,FGF8,SFRP1,SORL1,ZNF423,PDCD4,GPC3,TBXT,TCF7L2,KCP,RNF165,RBPJ,CRB2,KCND3,HTRA3,SMAD6,SMAD7
GO: Biological Process	GO:0051271	negative regulation of cellular component movement		1.733E-3	1.000E0	2.688E-2	2.619E-1	57	416	ACVRL1,ADA,ADORA1,AKT1,SEMA6A,APOD,SEMA4G,ARHGAP4,MAPK15,RAP2C,NEXMIF,ADGRB1,NF2,NFE2L2,LDLRAD4,SEMA5A,CD9,CDH1,CARD10,SEMA5B,DLL4,MMP28,MAP2K5,CX3CR1,DAB2IP,MAGI2,PTPRM,PTPRO,PTPRR,FBLN1,DLC1,SEMA6C,SEMA3F,SEMA4F,SEMA3C,SFRP1,SLIT1,LIMCH1,STK26,PBLD,CLASP2,KANK1,ABCC8,TBX5,NR2F2,NISCH,RNF20,CORO1C,HMGB1,WNT3,WNT11,RBPJ,SEMA3G,ADAMTS9,BMERB1,LRP1,SMAD7
GO: Biological Process	GO:0051336	regulation of hydrolase activity		1.747E-3	1.000E0	2.706E-2	2.637E-1	165	1435	RALGAPA1,MBP,ZFYVE1,ELFN2,MAP3K5,ADORA2A,AKT1,SIPA1L2,ARHGAP21,SH3RF1,GIT1,PI16,APP,ARHGAP4,GRHL3,MYL4,MYO1D,DOCK11,ADGRB3,NAPA,TNFRSF10B,ASAP2,SLC11A2,CAMK2B,NTRK2,BRSK2,TBC1D25,OPRD1,CD40,DGKI,CDH1,EVI5L,PDGFRB,ARHGAP22,SERPINB13,TBC1D22A,PLA2G1B,PLCG1,CMKLR1,IQGAP3,PLXNA1,CNN3,PMAIP1,ARHGEF19,EGLN1,POT1,PPP2R2C,PPP2R5C,RGS6,PPT1,PHACTR3,RAPGEF2,CTSD,MAP2K5,USP6NL,CX3CR1,DAB2IP,PHACTR2,ARHGAP24…
GO: Biological Process	GO:0070997	neuron death		1.752E-3	1.000E0	2.709E-2	2.639E-1	59	434	MAP3K5,ADORA1,FZD9,ADORA2A,PARP1,AKT1,CITED1,APP,ZPR1,CACNA1A,NTRK2,NR4A2,PRKN,CRLF1,SSH1,TMEM259,PITX3,RETREG1,PMAIP1,CNTFR,EGLN1,AATK,PPT1,CX3CR1,PTPRZ1,DIO3,FAM162A,PCSK9,EFNB2,ELK1,EPHB1,LRRK2,KCNIP3,CCL3,FGF8,FGFR3,RRAS2,ATG7,ITSN1,DPYSL4,HDAC7,FYN,SORL1,UNC5B,SRPK2,GDNF,KDM2B,TRIM2,GRID2,GRM4,ATP13A2,CIT,PARK7,HRAS,PINK1,ITPR1,KCNB1,KCNMA1,LRP1
GO: Biological Process	GO:0045934	negative regulation of nucleobase-containing compound metabolic process		1.790E-3	1.000E0	2.761E-2	2.690E-1	179	1573	ACVRL1,TENM2,MEIS2,AXIN2,SCAF4,PARP1,MTA3,ZNF608,AEBP1,FOXO4,MNT,TSHZ3,CITED1,MSX1,MAPK15,ZBTB10,ZFHX3,C11orf95,TNKS,MUC1,PRDM1,BMP7,NEUROD2,NFATC2,NFIB,NFIC,NFIX,SPINDOC,NOTCH2,NPAS1,PCBP3,LIMD1,NR4A2,BTAF1,RUNX2,CBFA2T3,PRKN,LRRFIP1,CDKN1C,PDE2A,PFKFB1,DDX54,RBM15B,PKP1,SPDEF,CDYL,HJV,PRRX1,TBX4,MAGED1,DLL4,TBX21,POT1,HINFP,NCOR2,FOXP4,CRYM,CTBP2,FEV,KDM4A,MAP2K5,TCF7L1,GLIS1,CUX1,PROX1,DAB2IP,…
GO: Biological Process	GO:0030501	positive regulation of bone mineralization		1.792E-3	1.000E0	2.761E-2	2.690E-1	11	44	ACVR1,FZD9,BMP7,BMPR1B,FBN2,FGFR3,SLC8A1,CD276,GPM6B,TMEM119,SMAD3
GO: Biological Process	GO:0072273	metanephric nephron morphogenesis		1.805E-3	1.000E0	2.777E-2	2.706E-1	8	26	CITED1,PDGFRB,KIF26B,LGR4,SALL1,FMN1,GDNF,STAT1
GO: Biological Process	GO:0014902	myotube differentiation		1.852E-3	1.000E0	2.844E-2	2.771E-1	24	138	ACTA1,MMP14,ADGRB1,ADGRB3,NEU2,NFATC2,NPHS1,CACNA1S,CD9,CD81,HACD1,PTGFRN,DMPK,EHD2,FLT3LG,SIK1,TMEM119,THRA,SMYD3,CYP26B1,NIBAN2,TANC1,KCNH1,ADAM12
GO: Biological Process	GO:1900449	regulation of glutamate receptor signaling pathway		1.854E-3	1.000E0	2.844E-2	2.771E-1	15	71	APP,SHISA9,NECAB2,CNIH3,DLG2,DLG3,EPHB2,CACNG3,RPH3A,SHANK2,CACNG5,FYN,PARK7,SHANK3,PINK1
GO: Biological Process	GO:0051968	positive regulation of synaptic transmission, glutamatergic		1.891E-3	1.000E0	2.886E-2	2.812E-1	10	38	ADORA2A,TSHZ3,NTRK2,OXTR,CACNG3,SHANK2,CACNG5,IQSEC2,TNR,SHANK3
GO: Biological Process	GO:0021799	cerebral cortex radially oriented cell migration		1.891E-3	1.000E0	2.886E-2	2.812E-1	10	38	MDGA1,CDK5R2,SUN2,DAB2IP,DAB1,DISC1,SYNE2,SUN1,BMERB1,LAMB1
GO: Biological Process	GO:0086091	regulation of heart rate by cardiac conduction		1.891E-3	1.000E0	2.886E-2	2.812E-1	10	38	ANK2,CACNA1G,CACNA1C,CACNA1D,DSG2,SCN5A,KCNA5,KCND3,KCNH2,KCNQ1
GO: Biological Process	GO:0008366	axon ensheathment		1.901E-3	1.000E0	2.892E-2	2.818E-1	26	154	MBP,AKT1,ABCD1,ANK2,BCAS1,SLC25A12,ZPR1,MYRF,NTRK2,CD9,B4GALT5,GAL3ST1,KLK6,PTPRZ1,RXRB,SCN8A,FGFR3,SLC8A3,SIRT2,FYN,SOX10,NKX6-2,NFASC,TCF7L2,ITGB4,MALL
GO: Biological Process	GO:0007272	ensheathment of neurons		1.901E-3	1.000E0	2.892E-2	2.818E-1	26	154	MBP,AKT1,ABCD1,ANK2,BCAS1,SLC25A12,ZPR1,MYRF,NTRK2,CD9,B4GALT5,GAL3ST1,KLK6,PTPRZ1,RXRB,SCN8A,FGFR3,SLC8A3,SIRT2,FYN,SOX10,NKX6-2,NFASC,TCF7L2,ITGB4,MALL
GO: Biological Process	GO:0035640	exploration behavior		1.912E-3	1.000E0	2.905E-2	2.830E-1	9	32	ATXN3,PENK,PRKCE,DPP4,LRRK2,SHANK2,TNR,SHANK3,JPH3
GO: Biological Process	GO:0051823	regulation of synapse structural plasticity		1.934E-3	1.000E0	2.915E-2	2.840E-1	5	11	CAMK2B,CTNNA2,DMPK,PPP1R9A,SHANK3
GO: Biological Process	GO:0035090	maintenance of apical/basal cell polarity		1.934E-3	1.000E0	2.915E-2	2.840E-1	5	11	ANK1,PDCD6IP,WNT11,CRB2,LLGL1
GO: Biological Process	GO:0060484	lung-associated mesenchyme development		1.934E-3	1.000E0	2.915E-2	2.840E-1	5	11	PTK7,FGFR1,FGFR2,WNT7B,WNT11
GO: Biological Process	GO:0071864	positive regulation of cell proliferation in bone marrow		1.934E-3	1.000E0	2.915E-2	2.840E-1	5	11	LEF1,FGFR3,FGFR2,FLT3LG,HMGA2
GO: Biological Process	GO:0099545	trans-synaptic signaling by trans-synaptic complex		1.934E-3	1.000E0	2.915E-2	2.840E-1	5	11	TENM2,FARP1,EPHB2,CADM1,IL1RAP
GO: Biological Process	GO:0006873	cellular ion homeostasis		1.965E-3	1.000E0	2.958E-2	2.882E-1	93	748	SLC24A3,TPCN1,ADORA1,FZD9,SLC24A4,ANK2,APP,ATP1A1,ATP1A3,SLC4A4,CACNA1I,CACNA1G,CACNA1A,CACNA1C,CACNA1D,CACNA1E,SLC11A2,ATP6V0E1,CASQ1,OXTR,CD40,PDE4D,PDE6B,ENPP1,PLA2G1B,PLCB3,PLCG1,CMKLR1,PLCG2,SLC25A23,MCOLN2,AKAP6,HJV,SLC31A1,EGLN1,SLC30A7,PPT1,PLCH2,PRKCB,PRKCE,CX3CR1,DMPK,MCUB,LRRK2,CCL1,CCL3,CIB2,RASA3,TMEM175,SLC39A4,MON1A,CLSTN1,SLC8A2,SLC8A1,SLC8A3,THADA,NOX1,FYN,FAM155B,SLC9A9,JPH4,DIS…
GO: Biological Process	GO:0014031	mesenchymal cell development		1.971E-3	1.000E0	2.961E-2	2.885E-1	18	93	ACVR1,SEMA6A,SEMA4G,NRP2,BMP7,CYP26C1,SEMA5A,SEMA5B,ZEB2,SEMA6C,SEMA3F,SEMA4F,SEMA3C,SOX10,KBTBD8,GDNF,CORO1C,SEMA3G
GO: Biological Process	GO:0098974	postsynaptic actin cytoskeleton organization		2.081E-3	1.000E0	3.100E-2	3.020E-1	7	21	ACTG1,MYH10,ADGRB1,CAMK2B,INA,FARP1,PPP1R9A
GO: Biological Process	GO:0071625	vocalization behavior		2.081E-3	1.000E0	3.100E-2	3.020E-1	7	21	NRXN3,NRXN2,AUTS2,MYH14,SHANK2,FOXP1,SHANK3
GO: Biological Process	GO:1903392	negative regulation of adherens junction organization		2.081E-3	1.000E0	3.100E-2	3.020E-1	7	21	ACVRL1,MMP14,APOD,DLC1,CLASP2,CORO1C,LRP1
GO: Biological Process	GO:0097107	postsynaptic density assembly		2.081E-3	1.000E0	3.100E-2	3.020E-1	7	21	LRFN4,NRXN2,PTPRS,SHANK2,GRID2,SHANK3,IL1RAP
GO: Biological Process	GO:0015812	gamma-aminobutyric acid transport		2.081E-3	1.000E0	3.100E-2	3.020E-1	7	21	APBA1,CACNA1A,SLC6A1,SLC6A11,HRH3,TRPC4,HTR2C
GO: Biological Process	GO:0007605	sensory perception of sound		2.083E-3	1.000E0	3.100E-2	3.020E-1	28	171	MBP,CDC14A,SPTBN4,MYO3A,CACNA1D,ROR1,TSPEAR,CDH1,OTOG,OTOF,COL11A1,CRYM,SOBP,MYH14,PDZD7,SCN8A,FGFR1,SLC1A3,GJB6,CDH23,PJVK,TMPRSS3,USH2A,KCNMA1,NAV2,KCNQ1,CHRNA10,KIT
GO: Biological Process	GO:0007163	establishment or maintenance of cell polarity		2.093E-3	1.000E0	3.111E-2	3.031E-1	36	237	MAP1B,ANK1,NUMA1,BRSK2,MAP7,PARVB,DCTN1,PTK7,DLG2,DLG3,PDCD6IP,KIF26B,EPHB1,FGF13,CAP2,RAB11FIP2,FRMD4A,PRICKLE2,CDK5RAP2,PARD6G,CLASP2,FRMD4B,PARD6B,KANK1,SYNE2,MTCL1,WWC1,CARMIL2,EZR,CYP26B1,WNT7B,WNT11,IGF1R,CRB2,DOCK8,LLGL1
GO: Biological Process	GO:0060976	coronary vasculature development		2.111E-3	1.000E0	3.129E-2	3.048E-1	16	79	MYH10,PRDM1,PDE2A,PDGFRB,PTK7,MEGF8,FGF1,FGFR1,TAB1,FGFR2,SMARCA4,GPC3,TBX5,NDST1,LRP1,SMAD6
GO: Biological Process	GO:0061448	connective tissue development		2.112E-3	1.000E0	3.129E-2	3.048E-1	45	314	MATN3,ACVRL1,AXIN2,UNCX,MSX1,BBS1,BGN,BMP7,BMPR1B,NFIB,AP1S2,VWA2,RUNX2,OXCT1,PAX7,PDGFRB,FTO,COL9A1,PRRX1,COL11A1,SELENOM,CHST11,CREB5,LINC-PINT,ZBTB7A,FGFR1,FGFR3,FBXW4,SORL1,SOX5,SULF2,DGAT2,GLG1,GLI2,GNAS,GPLD1,SIK3,PLAAT3,THRA,WNT7B,WNT11,VWA1,HMGA2,LRP5,SMAD3
GO: Biological Process	GO:0045833	negative regulation of lipid metabolic process		2.117E-3	1.000E0	3.131E-2	3.050E-1	19	101	ACACB,ADORA1,AKT1,APOD,PDE8B,ATP1A1,PROX1,DAB2IP,PIBF1,ATG7,SCAP,SORL1,SIK1,DGAT2,GPLD1,SIRT4,HRH1,CRTC3,ORMDL3
GO: Biological Process	GO:0050954	sensory perception of mechanical stimulus		2.145E-3	1.000E0	3.167E-2	3.086E-1	32	204	MBP,TSHZ3,CDC14A,SPTBN4,MYO3A,CACNA1D,ROR1,TSPEAR,CDH1,OTOG,OTOF,COL11A1,CRYM,SOBP,MYH14,PDZD7,SCN8A,FGFR1,SLC1A3,FYN,GJB6,CDH23,PHF24,PJVK,TMPRSS3,USH2A,HTR2A,KCNMA1,NAV2,KCNQ1,CHRNA10,KIT
GO: Biological Process	GO:0009100	glycoprotein metabolic process		2.162E-3	1.000E0	3.189E-2	3.107E-1	58	429	ABO,HS6ST2,C1GALT1C1,XXYLT1,HS6ST3,MUC1,MUC5AC,B4GALT4,BGN,BMPR1B,LARGE1,B4GALT5,HS6ST1,ST8SIA5,COL11A1,NECAB2,GAL3ST1,CHST11,HS2ST1,GALNT9,NUS1,CSPG4,CHST9,COG3,GALNT18,HS3ST3B1,HS3ST3A1,CHPF,COG7,HBEGF,CELA1,EXT1,ST6GAL1,ST3GAL3,TRAK1,TET1,FUT2,AGO2,ERP44,GALNT7,XYLT1,SULF2,NEU4,B3GNT9,TCF7L2,CHST8,GXYLT2,POFUT1,MGAT4B,PARK7,MGAT5B,ENGASE,NDST1,PORCN,INSR,C1GALT1,ADAMTS9,LIPC
GO: Biological Process	GO:0001953	negative regulation of cell-matrix adhesion		2.176E-3	1.000E0	3.204E-2	3.121E-1	11	45	ACVRL1,MMP14,APOD,NEXMIF,NF2,ENPP2,DLC1,CLASP2,AJAP1,CORO1C,LRP1
GO: Biological Process	GO:0036445	neuronal stem cell division		2.203E-3	1.000E0	3.210E-2	3.127E-1	6	16	LEF1,FGF13,FGFR1,FGFR2,SOX5,AKNA
GO: Biological Process	GO:0098885	modification of postsynaptic actin cytoskeleton		2.203E-3	1.000E0	3.210E-2	3.127E-1	6	16	MYH10,WASF1,CTNNA2,BAIAP2,ITSN1,TIAM1
GO: Biological Process	GO:0072283	metanephric renal vesicle morphogenesis		2.203E-3	1.000E0	3.210E-2	3.127E-1	6	16	CITED1,KIF26B,SALL1,FMN1,GDNF,STAT1
GO: Biological Process	GO:0050862	positive regulation of T cell receptor signaling pathway		2.203E-3	1.000E0	3.210E-2	3.127E-1	6	16	ADA,CD81,TESPA1,NECTIN2,USP12,KCNN4
GO: Biological Process	GO:0098696	regulation of neurotransmitter receptor localization to postsynaptic specialization membrane		2.203E-3	1.000E0	3.210E-2	3.127E-1	6	16	MAGI2,GPC6,GPC4,IQSEC2,RAPGEF4,HRAS
GO: Biological Process	GO:0010752	regulation of cGMP-mediated signaling		2.203E-3	1.000E0	3.210E-2	3.127E-1	6	16	NPR1,NPR2,PDE2A,PDE11A,PDE10A,RUNDC3A
GO: Biological Process	GO:0055057	neuroblast division		2.203E-3	1.000E0	3.210E-2	3.127E-1	6	16	LEF1,FGF13,FGFR1,FGFR2,SOX5,AKNA
GO: Biological Process	GO:0006875	cellular metal ion homeostasis		2.244E-3	1.000E0	3.264E-2	3.180E-1	83	658	SLC24A3,TPCN1,ADORA1,FZD9,SLC24A4,ANK2,APP,ATP1A1,ATP1A3,CACNA1I,CACNA1G,CACNA1A,CACNA1C,CACNA1D,CACNA1E,SLC11A2,CASQ1,OXTR,CD40,PDE4D,PDE6B,PLA2G1B,PLCB3,PLCG1,CMKLR1,PLCG2,SLC25A23,MCOLN2,AKAP6,HJV,SLC31A1,EGLN1,SLC30A7,PLCH2,PRKCB,PRKCE,CX3CR1,DMPK,MCUB,CCL1,CCL3,CIB2,RASA3,SLC39A4,MON1A,CLSTN1,SLC8A2,SLC8A1,SLC8A3,THADA,FYN,FAM155B,JPH4,DISC1,CDH23,NMU,GHRH,GOT1,GRIN2C,TMBIM6,ATP13A2,HRH3,TRP…
GO: Biological Process	GO:0071322	cellular response to carbohydrate stimulus		2.251E-3	1.000E0	3.269E-2	3.185E-1	29	180	PHPT1,PDE8B,CACNA1D,CACNA1E,BRSK2,OXCT1,PRKN,CDK16,PDE1C,PRKCB,PRKCE,MAP2K6,ZBTB20,PTPRN2,LIN28A,SIDT2,ATG7,RAB11FIP2,SLC2A5,SMARCA4,GJB6,GPLD1,TCF7L2,TIAM1,IGF1R,C1QTNF12,KCNB1,LRP1,LRP5
GO: Biological Process	GO:0051147	regulation of muscle cell differentiation		2.269E-3	1.000E0	3.290E-2	3.205E-1	33	213	FZD7,FOXO4,MMP14,TSHZ3,PI16,MSX1,ADGRB1,NEU2,NFATC2,AKAP6,CTNNA2,PROX1,BOC,NEK5,DMPK,DNMT1,EFNB2,EHD2,FGFR2,FLT3LG,FOXP1,MEGF10,SIK1,PDCD4,SUPT6H,TCF3,TMEM119,THRA,AKAP13,CYP26B1,NIBAN2,RBPJ,KIT
GO: Biological Process	GO:0044089	positive regulation of cellular component biogenesis		2.274E-3	1.000E0	3.293E-2	3.208E-1	73	566	MAP1B,TENM2,CRACD,PARP1,EPB41L5,MAPK15,SKAP1,DOCK11,LRSAM1,ADGRB1,ADGRB2,ADGRB3,BMP7,MYO3A,NF2,WASF1,NPHS1,NTRK2,NUMA1,OXTR,NEURL1,ENPP2,PIP4K2A,LMOD1,PMAIP1,COL16A1,DNM3,AUTS2,PRKCE,CTNNA2,CROCC,PROX1,PIEZO1,MTSS1,DCTN1,RASIP1,RBX1,PDCD6IP,ARPC1B,ACE2,EPHB1,EPHB2,EPHB3,EPS8,FMN1,BAIAP2,SFRP1,ADGRL1,CLSTN1,CDK5RAP2,LIMCH1,SPIRE2,SEPTIN9,CLASP2,CLSTN2,SLITRK2,SYK,VSTM5,ADGRL3,ATMIN,CUX2,CARMIL2,GR…
GO: Biological Process	GO:0048013	ephrin receptor signaling pathway		2.333E-3	1.000E0	3.366E-2	3.279E-1	17	87	ACTG1,GIT1,ARPC1B,EFNB2,EPHA4,EPHA8,EPHB1,EPHB2,EPHB3,EPHB6,ITSN1,FYN,ANKS1A,ARHGEF28,TIAM1,HRAS,RBPJ
GO: Biological Process	GO:0030513	positive regulation of BMP signaling pathway		2.335E-3	1.000E0	3.366E-2	3.279E-1	10	39	ACVRL1,MSX1,NOTCH2,NUMA1,ZNF423,GPC3,KCP,RNF165,RBPJ,CRB2
GO: Biological Process	GO:0021884	forebrain neuron development		2.335E-3	1.000E0	3.366E-2	3.279E-1	10	39	NRP2,RAPGEF2,FEZF2,FGF8,FGFR1,FGFR2,ATG7,SLIT1,SLIT3,DISC1
GO: Biological Process	GO:0030003	cellular cation homeostasis		2.374E-3	1.000E0	3.417E-2	3.329E-1	91	734	SLC24A3,TPCN1,ADORA1,FZD9,SLC24A4,ANK2,APP,ATP1A1,ATP1A3,SLC4A4,CACNA1I,CACNA1G,CACNA1A,CACNA1C,CACNA1D,CACNA1E,SLC11A2,ATP6V0E1,CASQ1,OXTR,CD40,PDE4D,PDE6B,PLA2G1B,PLCB3,PLCG1,CMKLR1,PLCG2,SLC25A23,MCOLN2,AKAP6,HJV,SLC31A1,EGLN1,SLC30A7,PPT1,PLCH2,PRKCB,PRKCE,CX3CR1,DMPK,MCUB,LRRK2,CCL1,CCL3,CIB2,RASA3,TMEM175,SLC39A4,MON1A,CLSTN1,SLC8A2,SLC8A1,SLC8A3,THADA,NOX1,FYN,FAM155B,SLC9A9,JPH4,DISC1,CDH…
GO: Biological Process	GO:0099563	modification of synaptic structure		2.416E-3	1.000E0	3.463E-2	3.374E-1	9	33	MYH10,WASF1,DLGAP3,CHMP2B,CTNNA2,EPHA4,BAIAP2,ITSN1,TIAM1
GO: Biological Process	GO:0030239	myofibril assembly		2.417E-3	1.000E0	3.463E-2	3.374E-1	16	80	ACTA1,ACTG1,MYH3,MYH10,NRAP,CASQ1,PDGFRB,LMOD1,PRKAR1A,PROX1,OBSCN,FHOD3,ANKRD1,FOXP1,AKAP13,TTN
GO: Biological Process	GO:0086003	cardiac muscle cell contraction		2.417E-3	1.000E0	3.463E-2	3.374E-1	16	80	ADORA1,ANK2,ATP1A1,CACNA1G,CACNA1C,CACNA1D,PDE4D,AKAP6,DSG2,SCN5A,FGF12,FGF13,KCNA5,KCND3,KCNH2,KCNQ1
GO: Biological Process	GO:0003341	cilium movement		2.449E-3	1.000E0	3.504E-2	3.413E-1	29	181	BBS1,CACNA1I,CACNA1E,NEURL1,DNAAF1,CFAP251,CFAP54,TAF7L,PLTP,CATSPERZ,DPCD,CFAP61,ULK4,DNAH6,DNAH8,DNAH9,MEGF8,CFAP69,KIAA0319L,DNAI1,PRDM14,TTLL5,SLC9C1,CELF3,DNAI2,CATSPERD,CCDC114,UBE2B,AK7
GO: Biological Process	GO:0050922	negative regulation of chemotaxis		2.493E-3	1.000E0	3.560E-2	3.469E-1	14	66	SEMA6A,SEMA4G,SEMA5A,SEMA5B,MMP28,PTPRO,SEMA6C,SEMA3F,SEMA4F,SEMA3C,ST6GAL1,SLIT1,WNT3,SEMA3G
GO: Biological Process	GO:0072503	cellular divalent inorganic cation homeostasis		2.512E-3	1.000E0	3.582E-2	3.490E-1	72	559	SLC24A3,TPCN1,ADORA1,FZD9,SLC24A4,ANK2,APP,CACNA1I,CACNA1G,CACNA1A,CACNA1C,CACNA1D,CACNA1E,CASQ1,OXTR,CD40,PDE4D,PDE6B,PLA2G1B,PLCB3,PLCG1,CMKLR1,PLCG2,SLC25A23,MCOLN2,AKAP6,SLC30A7,PLCH2,PRKCB,PRKCE,CX3CR1,DMPK,MCUB,CCL1,CCL3,CIB2,RASA3,SLC39A4,CLSTN1,SLC8A2,SLC8A1,SLC8A3,THADA,FYN,FAM155B,JPH4,DISC1,CDH23,NMU,GHRH,GOT1,GRIN2C,TMBIM6,ATP13A2,HRH3,TRPC4,HMGB1,FAM155A,VDR,HTR2A,HTR2C,ITPR1,ITPR2,I…
GO: Biological Process	GO:0021543	pallium development		2.566E-3	1.000E0	3.655E-2	3.561E-1	31	198	NCOA1,TMEM108,MDGA1,BBS1,NRP2,NF2,CDK5R2,NTRK2,SUN2,CX3CR1,PROX1,DAB2IP,DAB1,ZEB2,PTPRS,FAT4,FEZF2,LEF1,FGF8,FGF13,FGFR1,ATG7,DMRTA2,DISC1,KIRREL3,SYNE2,SUN1,NR2F1,BMERB1,LAMB1,LRP1
GO: Biological Process	GO:0048754	branching morphogenesis of an epithelial tube		2.617E-3	1.000E0	3.718E-2	3.623E-1	30	190	ACVR1,MMP14,CITED1,BMP7,NOTCH4,SEMA5A,PBX1,COL4A1,MAGED1,DLL4,CELSR1,CTSD,RASIP1,FAT4,LEF1,ETV4,LGR4,ETV5,SALL1,FGF1,FGF8,FGFR2,GDNF,GPC3,GLI2,TBX3,NRARP,VDR,HMGA2,LRP5
GO: Biological Process	GO:0010464	regulation of mesenchymal cell proliferation		2.625E-3	1.000E0	3.718E-2	3.623E-1	11	46	NFIB,PRRX1,FGFR1,FGFR2,FBXW4,FOXP1,STAT1,SYNE1,HMGB1,WNT11,LRP5
GO: Biological Process	GO:0019228	neuronal action potential		2.625E-3	1.000E0	3.718E-2	3.623E-1	11	46	ANK3,CACNA1I,CACNA1G,DPP6,MYH14,SCN4A,SCN5A,SCN8A,FGF12,RAPGEF4,KCNMA1
GO: Biological Process	GO:0006936	muscle contraction		2.627E-3	1.000E0	3.718E-2	3.623E-1	53	388	MB,ACTA1,ADA,ADORA1,TSHZ3,ANK2,ATP1A1,ATP1A3,MYH3,MYL4,MYLK,MYH13,CACNA1G,CACNA1C,CACNA1D,CACNA1S,CASQ1,OXTR,PDE4D,PGAM2,CHRM3,CCDC78,LMOD1,AKAP6,MAP2K6,PTAFR,DMPK,DSG2,ACE2,MYH14,SCN4A,SCN5A,FGF12,FGF13,SLC6A8,SLC8A1,SLC8A3,GDNF,NMU,SULF2,GRIP2,TPM3,TTN,UTRN,HTR2A,KCNA5,KCND3,KCNH2,KCNMA1,KCNQ1,KIT,SSPN,SMAD7
GO: Biological Process	GO:0061333	renal tubule morphogenesis		2.648E-3	1.000E0	3.743E-2	3.647E-1	17	88	CITED1,PBX1,COL4A1,MAGED1,IRX3,HS2ST1,MTSS1,FAT4,KIF26B,LGR4,SALL1,FMN1,FGF1,FGF8,GDNF,GPC3,WNT11
GO: Biological Process	GO:0030510	regulation of BMP signaling pathway		2.671E-3	1.000E0	3.765E-2	3.668E-1	19	103	ACVRL1,MSX1,NOTCH2,NUMA1,HJV,SOSTDC1,HTRA1,SFRP1,SORL1,ZNF423,GPC3,TCF7L2,KCP,RNF165,RBPJ,CRB2,HTRA3,SMAD6,SMAD7
GO: Biological Process	GO:0007044	cell-substrate junction assembly		2.671E-3	1.000E0	3.765E-2	3.668E-1	19	103	ACVRL1,MMP14,EPB41L5,APOD,CD151,ENPP2,COL16A1,DLC1,FMN1,SFRP1,LIMCH1,CLASP2,GPM6B,TNS1,CORO1C,ITGA5,ITGB4,LRP1,SMAD3
GO: Biological Process	GO:1902532	negative regulation of intracellular signal transduction		2.692E-3	1.000E0	3.789E-2	3.691E-1	85	681	ADCY9,ADORA1,HEG1,AKT1,SEMA6A,GIT1,MUC1,MARCO,TNK1,BMP7,NF2,NFE2L2,LIMD1,OPRD1,USP10,PRKN,PAQR3,PDE2A,PDE4D,GPR37L1,CHRM3,RRM2B,EGLN1,PPP2R5C,CSK,DAB2IP,ARHGAP24,RASSF2,MAGI2,PTPN1,RASIP1,PTPRR,ARHGAP25,PDE11A,DUSP7,DUSP8,DUSP9,RANBP9,RGS3,ACE2,KCTD10,EPHB2,LRRK2,OBSCN,MECOM,SPRED3,FBLN1,TAOK3,DLC1,FBP1,SFRP1,RASA3,HDAC7,RGS14,CNKSR3,SORL1,SIK1,PDE10A,PDCD4,STAT1,RTKN2,KANK1,GNAI3,GNAL,GNAZ,WWC1,…
GO: Biological Process	GO:0010976	positive regulation of neuron projection development		2.740E-3	1.000E0	3.850E-2	3.751E-1	51	371	MAP1B,MAP6,RNF157,ENC1,CPNE5,SCARF1,BMP7,NFE2L2,CAMK2B,NTRK2,SEMA5A,SYT2,NEURL1,PRKN,MAP3K13,PLXNA1,CNTN1,ITSN2,RAPGEF2,CUX1,DAB2IP,ZEB2,PTK7,MAGI2,PTPRZ1,MEGF8,FBXO31,EPHA4,CDKL3,FGFR1,BAIAP2,ITSN1,PPP1R9A,TRAK1,SHANK2,TENM3,ANKRD1,FYN,DISC1,ACSL6,CUX2,RAPGEF1,GRIP1,TIAM1,WNT3,SHANK3,IGF1R,IL1RAP,ITPR1,LRP1,SF3A2
GO: Biological Process	GO:0008088	axo-dendritic transport		2.759E-3	1.000E0	3.871E-2	3.771E-1	16	81	MAP6,APBA1,APP,AP3B1,MADD,TMEM108,KIF1A,BSN,WASF1,DCTN1,PURA,DLG2,TRAK1,MAPK8IP3,KIF5A,KIF5C
GO: Biological Process	GO:0001504	neurotransmitter uptake		2.799E-3	1.000E0	3.922E-2	3.821E-1	12	53	PRKN,FEV,SLC1A2,SLC1A3,SLC6A1,SLC6A9,SLC6A11,GDNF,GPM6B,PARK7,SLC38A1,SLC17A6
GO: Biological Process	GO:2001224	positive regulation of neuron migration		2.811E-3	1.000E0	3.933E-2	3.831E-1	7	22	SEMA6A,RAPGEF2,DAB2IP,PTPRZ1,FBXO31,ZNF609,MAPK8IP3
GO: Biological Process	GO:0034333	adherens junction assembly		2.838E-3	1.000E0	3.965E-2	3.863E-1	18	96	ACVRL1,MMP14,EPB41L5,APOD,ENPP2,COL16A1,DLC1,FMN1,ZNF703,SFRP1,LIMCH1,CLASP2,GPM6B,PIP5K1C,CORO1C,LRP1,SMAD3,SMAD7
GO: Biological Process	GO:0007632	visual behavior		2.843E-3	1.000E0	3.966E-2	3.863E-1	15	74	MEIS2,APP,PDE8B,ATP1A3,AP1S2,CACNA1C,CACNA1E,ATXN1,SLC1A2,RGS14,ABCC8,TAFA2,HRH1,TANC1,KIT
GO: Biological Process	GO:0050931	pigment cell differentiation		2.859E-3	1.000E0	3.977E-2	3.875E-1	10	40	CITED1,AP1M1,ENPP1,ZEB2,LRMDA,ADAMTS20,SOX10,ADAMTS9,HPS4,KIT
GO: Biological Process	GO:0099068	postsynapse assembly		2.859E-3	1.000E0	3.977E-2	3.875E-1	10	40	LRFN4,NRXN2,DNM3,MAGI2,PTPRS,EPHB2,SHANK2,GRID2,SHANK3,IL1RAP
GO: Biological Process	GO:0071229	cellular response to acid chemical		2.886E-3	1.000E0	4.005E-2	3.902E-1	35	233	FZD7,AKT1,ASS1,NPAS4,NTRK2,NEURL1,PRKN,CDH1,COL4A1,COL16A1,PRKCE,PTAFR,PTK7,DNMT1,RXRB,FGFR2,BAIAP2,SFRP1,SIPA1,FOXP1,FYN,SREBF1,DGAT2,TBXT,GNAS,FFAR2,TEAD1,SH3BP4,CYP26B1,WNT3,WNT7B,WNT8B,WNT11,XRCC5,PINK1
GO: Biological Process	GO:0099172	presynapse organization		2.888E-3	1.000E0	4.005E-2	3.902E-1	14	67	APP,MDGA1,BSN,LRFN4,ERC2,CTBP2,PTPRS,EFNB2,FARP1,GPC4,SLITRK2,GRID2,CADM1,IL1RAP
GO: Biological Process	GO:1901699	cellular response to nitrogen compound		2.909E-3	1.000E0	4.029E-2	3.925E-1	93	758	MAP1B,ACTA1,ADCY9,MAP3K5,PARP1,ARID1B,AKT1,FOXO4,IRS4,PIK3R3,APP,ASS1,ATP1A3,NFE2L2,VWA2,CACNA1A,CACNA1S,ATP6V0E1,NTRK2,NR4A2,OPRD1,NEURL1,PRKN,HTR3B,CDH1,PDE2A,PDE4D,ENPP1,PENK,CHRM3,SSH1,PLA2G1B,AKAP6,COL4A1,COL16A1,BCAR1,CSK,PRKAR1A,PRKCB,RAPGEF2,PTAFR,PTPN1,PCSK9,DNMT1,KLF16,OTOP1,EPHA4,LRRK2,NOD1,BAIAP2,SLURP2,CIB2,SFRP1,ATG7,SLC5A5,DNAI1,SLC8A1,SLC8A3,SIRT2,FYN,GAB1,SORL1,GABRB1,SREBF1,STAT…
GO: Biological Process	GO:0043578	nuclear matrix organization		2.952E-3	1.000E0	4.065E-2	3.960E-1	3	4	SUN2,SYNE1,SUN1
GO: Biological Process	GO:0072093	metanephric renal vesicle formation		2.952E-3	1.000E0	4.065E-2	3.960E-1	3	4	KIF26B,SALL1,FMN1
GO: Biological Process	GO:0003340	negative regulation of mesenchymal to epithelial transition involved in metanephros morphogenesis		2.952E-3	1.000E0	4.065E-2	3.960E-1	3	4	CITED1,SALL1,STAT1
GO: Biological Process	GO:0021678	third ventricle development		2.952E-3	1.000E0	4.065E-2	3.960E-1	3	4	MYH10,DPCD,KDM2B
GO: Biological Process	GO:2000036	regulation of stem cell population maintenance		3.020E-3	1.000E0	4.147E-2	4.040E-1	9	34	BMP7,NFYA,TCF7L1,ESRRB,PRDM14,KDM2B,TEAD1,LBH,HMGA2
GO: Biological Process	GO:0060487	lung epithelial cell differentiation		3.020E-3	1.000E0	4.147E-2	4.040E-1	9	34	NFIB,NUMA1,SPDEF,NCOR2,FOXP4,FOXP1,THRA,FNDC3B,RBPJ
GO: Biological Process	GO:0106030	neuron projection fasciculation		3.039E-3	1.000E0	4.154E-2	4.047E-1	8	28	SEMA5A,PTPRZ1,FEZF2,CRTAC1,MEGF8,EPHA4,EPHB2,EPHB3
GO: Biological Process	GO:0032957	inositol trisphosphate metabolic process		3.039E-3	1.000E0	4.154E-2	4.047E-1	8	28	PLCB3,PLCG1,PLCG2,PLCH2,PTAFR,PLCD4,HRH1,ITPK1
GO: Biological Process	GO:0007413	axonal fasciculation		3.039E-3	1.000E0	4.154E-2	4.047E-1	8	28	SEMA5A,PTPRZ1,FEZF2,CRTAC1,MEGF8,EPHA4,EPHB2,EPHB3
GO: Biological Process	GO:1902459	positive regulation of stem cell population maintenance		3.064E-3	1.000E0	4.171E-2	4.064E-1	5	12	ESRRB,PRDM14,KDM2B,TEAD1,LBH
GO: Biological Process	GO:0070255	regulation of mucus secretion		3.064E-3	1.000E0	4.171E-2	4.064E-1	5	12	ADA,ADORA1,PRKCE,ATG7,MAP1LC3B
GO: Biological Process	GO:0033632	regulation of cell-cell adhesion mediated by integrin		3.064E-3	1.000E0	4.171E-2	4.064E-1	5	12	ADA,SKAP1,PODXL,PIEZO1,DPP4
GO: Biological Process	GO:0003007	heart morphogenesis		3.084E-3	1.000E0	4.192E-2	4.084E-1	42	294	ACVR1,ACVRL1,AXIN2,HEG1,MSX1,NRP2,BMP7,NOTCH2,DNAAF1,COL11A1,DLL4,EGLN1,NCOR2,PROX1,IFT172,FAT4,MEGF8,ERG,ZFPM1,DLC1,FGF8,TAB1,FGFR2,SEMA3C,SLC8A1,ANKRD1,SLIT3,SMARCA4,PDCD4,TBXT,TBX5,TBX3,FOXN4,TEAD1,TTN,WNT11,ZIC3,RBPJ,INSR,SMAD3,SMAD6,SMAD7
GO: Biological Process	GO:1904294	positive regulation of ERAD pathway		3.141E-3	1.000E0	4.247E-2	4.137E-1	6	17	ATXN3,NFE2L2,TMEM259,UBQLN2,RNFT1,SGTA
GO: Biological Process	GO:0014051	gamma-aminobutyric acid secretion		3.141E-3	1.000E0	4.247E-2	4.137E-1	6	17	APBA1,CACNA1A,SLC6A1,HRH3,TRPC4,HTR2C
GO: Biological Process	GO:1905244	regulation of modification of synaptic structure		3.141E-3	1.000E0	4.247E-2	4.137E-1	6	17	MYH10,CHMP2B,EPHA4,BAIAP2,ITSN1,TIAM1
GO: Biological Process	GO:0021983	pituitary gland development		3.145E-3	1.000E0	4.247E-2	4.137E-1	11	47	MSX1,CDH1,DUOX2,SALL1,FGF8,SOX3,GHRH,GLI2,TCF7L2,RBPJ,HMGA2
GO: Biological Process	GO:0071559	response to transforming growth factor beta		3.146E-3	1.000E0	4.247E-2	4.137E-1	40	277	ACVR1,ACVRL1,PARP1,EPB41L5,CITED1,ZFHX3,BMPR1B,LDLRAD4,CDKN1C,PDE2A,PENK,ONECUT2,CHST11,CX3CR1,HTRA1,DNMT1,LRG1,ZBTB7A,FBN2,TAB1,FGFR2,ZNF703,SFRP1,WFIKKN1,ANKRD1,FYN,PRDM16,SOX5,WWOX,PBLD,GDNF,GLG1,GOT1,IGF1R,PMEPA1,HTRA3,LTBP2,SMAD3,SMAD6,SMAD7
GO: Biological Process	GO:0048738	cardiac muscle tissue development		3.218E-3	1.000E0	4.337E-2	4.225E-1	41	286	ACADM,ACVR1,MEIS1,FZD7,HEG1,PI16,MYH10,BMP7,NRAP,PDGFRB,AKAP6,COL11A1,DLL4,EGLN1,PRKAR1A,PROX1,DSG2,EFNB2,SPEG,ZFPM1,RXRB,FGF1,FGF8,FGFR1,FGFR2,ATG7,FHOD3,SLC8A1,ANKRD1,FOXP1,SIK1,TBXT,MYO18B,TBX5,TBX3,AKAP13,TTN,RBPJ,ADAMTS9,JPH2,SMAD7
GO: Biological Process	GO:0071331	cellular response to hexose stimulus		3.237E-3	1.000E0	4.351E-2	4.239E-1	27	168	PHPT1,PDE8B,CACNA1D,CACNA1E,BRSK2,OXCT1,PRKN,CDK16,PDE1C,PRKCE,ZBTB20,PTPRN2,LIN28A,SIDT2,ATG7,RAB11FIP2,SLC2A5,SMARCA4,GJB6,GPLD1,TCF7L2,TIAM1,IGF1R,C1QTNF12,KCNB1,LRP1,LRP5
GO: Biological Process	GO:0006865	amino acid transport		3.237E-3	1.000E0	4.351E-2	4.239E-1	27	168	ADORA1,ADORA2A,SFXN2,PPFIA4,APBA1,PPFIA3,SLC25A12,CACNA1A,NTRK2,SLC7A7,ACE2,SLC1A2,SLC1A3,SLC1A5,SLC6A1,SLC6A9,SLC6A11,SLC7A1,SLC7A3,SLC7A10,HRH3,TRPC4,SH3BP4,HTR2C,SLC6A17,SLC38A1,SLC17A6
GO: Biological Process	GO:0086001	cardiac muscle cell action potential		3.256E-3	1.000E0	4.370E-2	4.257E-1	15	75	ANK2,ANK3,ATP1A1,CACNA1G,CACNA1C,CACNA1D,DSG2,SCN5A,FGF12,FGF13,SLC8A1,KCNA5,KCND3,KCNH2,KCNQ1
GO: Biological Process	GO:0015696	ammonium transport		3.288E-3	1.000E0	4.406E-2	4.293E-1	23	136	ADA,ADORA2A,MAPK15,CACNA1A,SYT2,SYT7,PRKN,PDZK1,PRKCB,FEV,FCER1G,SCN4A,SLC6A8,GDNF,SYK,GPM6B,SLC44A1,HRH3,PARK7,HTR2A,HTR2C,PINK1,RHBG
GO: Biological Process	GO:0051282	regulation of sequestering of calcium ion		3.300E-3	1.000E0	4.410E-2	4.296E-1	24	144	TPCN1,ANK2,CACNA1C,CASQ1,PDE4D,PLCB3,PLCG1,PLCG2,SLC25A23,MCOLN2,AKAP6,PLCH2,PRKCE,CCL3,RASA3,SLC8A1,JPH4,HTR2A,HTR2C,ITPR1,ITPR2,ITPR3,JPH2,JPH3
GO: Biological Process	GO:0099054	presynapse assembly		3.301E-3	1.000E0	4.410E-2	4.296E-1	12	54	APP,MDGA1,BSN,LRFN4,PTPRS,EFNB2,FARP1,GPC4,SLITRK2,GRID2,CADM1,IL1RAP
GO: Biological Process	GO:0031032	actomyosin structure organization		3.304E-3	1.000E0	4.410E-2	4.296E-1	33	218	ACTA1,ACTG1,EPB41L5,MYH3,MYH10,NF2,NRAP,CASQ1,PDGFRB,LMOD1,CNN3,PRKAR1A,PROX1,PDCD6IP,MYH14,EPB41L1,OBSCN,DLC1,SFRP1,PPP1R9A,ASAP3,FHOD3,ANKRD1,FOXP1,LIMCH1,CLASP2,EPB41L4A,CIT,AKAP13,TTN,WNT11,KANK4,SMAD3
GO: Biological Process	GO:0043401	steroid hormone mediated signaling pathway		3.323E-3	1.000E0	4.429E-2	4.315E-1	30	193	PARP1,NCOA1,BMP7,KLF9,NTRK2,NR4A2,TRIP4,DDX54,NCOR2,NR2E3,LEF1,ESRRB,ESRRG,RXRB,ZBTB7A,SFRP1,SMARCA4,FOXP1,NR5A1,NR2F1,NR2F2,GRIP1,THRA,AKAP13,PARK7,NR1H2,VDR,PMEPA1,LBH,HMGA2
GO: Biological Process	GO:1903827	regulation of cellular protein localization		3.342E-3	1.000E0	4.448E-2	4.333E-1	78	621	ABHD17A,FZD9,PARP1,AKT1,MMP14,USP36,ANK3,APOD,LRRC15,NF2,ZPR1,NMT1,CAMK2B,NUMA1,BRSK2,PRKN,CD81,CDH1,PDZK1,CARD10,SSH1,PMAIP1,NECAB2,MAGED1,CSK,PRKCE,PRKCH,CROCC,MAGI2,PTPN1,PTPN14,DPP6,GPC6,EFNB2,EPHB2,LRRK2,FCER1G,GPC4,GPC5,RAB11FIP2,ABLIM3,ANKRD13A,SIRT2,FYN,SORL1,IQSEC2,SREBF1,ARHGEF16,GPC3,SUPT6H,MTCL1,GPM6B,TCF7L2,SYNE1,RAPGEF4,XPO4,PIP5K1C,ATP13A2,SIRT4,TFDP1,GRIP2,PARK7,HPCA,HRAS,HSPA1L,I…
GO: Biological Process	GO:0009101	glycoprotein biosynthetic process		3.377E-3	1.000E0	4.488E-2	4.372E-1	49	357	ABO,HS6ST2,C1GALT1C1,XXYLT1,HS6ST3,MUC1,MUC5AC,B4GALT4,BGN,BMPR1B,LARGE1,B4GALT5,HS6ST1,ST8SIA5,NECAB2,GAL3ST1,CHST11,HS2ST1,GALNT9,NUS1,CSPG4,CHST9,COG3,GALNT18,HS3ST3B1,HS3ST3A1,CHPF,COG7,HBEGF,EXT1,ST6GAL1,ST3GAL3,TRAK1,TET1,FUT2,AGO2,GALNT7,XYLT1,B3GNT9,TCF7L2,CHST8,GXYLT2,POFUT1,MGAT4B,MGAT5B,NDST1,INSR,C1GALT1,LIPC
GO: Biological Process	GO:0008593	regulation of Notch signaling pathway		3.457E-3	1.000E0	4.585E-2	4.467E-1	20	113	AKT1,MMP14,BMP7,NOTCH4,TSPEAR,NEURL1,DLL4,DTX1,TSPAN5,KCTD10,ZBTB7A,MAML3,MAML2,POFUT1,NRARP,NIBAN2,RBPJ,GDPD5,KIT,LLGL1
GO: Biological Process	GO:0001659	temperature homeostasis		3.464E-3	1.000E0	4.585E-2	4.467E-1	28	177	ADORA1,TNFSF11,TNFRSF11A,KSR2,OXTR,PCTP,CMKLR1,FTO,PRKAB1,MAP2K6,ESRRG,LGR4,PRDM16,ZNF423,NMU,LPIN1,SYK,GNAS,GRB10,TFE3,THRA,TSHR,NR1H2,HTR2A,IGF1R,RBPJ,LAMA4,LNPEP
GO: Biological Process	GO:0090288	negative regulation of cellular response to growth factor stimulus		3.464E-3	1.000E0	4.585E-2	4.467E-1	28	177	SEMA6A,LDLRAD4,HJV,ONECUT2,SOSTDC1,CHST11,ADGRA2,DAB2IP,HTRA1,PTPN1,ZBTB7A,FBN2,SFRP1,WFIKKN1,PRDM16,PRDM14,SORL1,PBLD,SULF2,GLG1,TCF7L2,NIBAN2,PMEPA1,HTRA3,SPRY4,SMAD3,SMAD6,SMAD7
GO: Biological Process	GO:1905898	positive regulation of response to endoplasmic reticulum stress		3.474E-3	1.000E0	4.591E-2	4.473E-1	10	41	ATXN3,NFE2L2,TMEM259,PMAIP1,UBQLN2,DAB2IP,PTPN1,RNFT1,SGTA,ATF6
GO: Biological Process	GO:0071560	cellular response to transforming growth factor beta stimulus		3.497E-3	1.000E0	4.615E-2	4.496E-1	39	270	ACVR1,ACVRL1,PARP1,EPB41L5,CITED1,BMPR1B,LDLRAD4,CDKN1C,PDE2A,PENK,ONECUT2,CHST11,CX3CR1,HTRA1,DNMT1,LRG1,ZBTB7A,FBN2,TAB1,FGFR2,ZNF703,SFRP1,WFIKKN1,ANKRD1,FYN,PRDM16,SOX5,WWOX,PBLD,GDNF,GLG1,GOT1,IGF1R,PMEPA1,HTRA3,LTBP2,SMAD3,SMAD6,SMAD7
GO: Biological Process	GO:0033043	regulation of organelle organization		3.519E-3	1.000E0	4.639E-2	4.519E-1	158	1391	MAP1B,MAP6,SMC1A,MAP3K4,AXIN2,FZD9,CRACD,PARP1,AKT1,USP36,VPS18,ANK1,SLC25A5,CDC14A,SPTBN4,MSX1,MAPK15,PHPT1,TNKS,GRHL3,MUC1,LRSAM1,BMP7,MYO3A,NF2,NMT1,WASF1,NOTCH2,NPHS1,CAMK2B,NUMA1,CAPZB,SEMA5A,TBC1D25,SYT2,ODF2,SYT7,OSM,PRKN,PAX7,CDC25C,EVI5L,CDKN1C,PDE2A,PDGFRB,RCC1,KPNA7,LRFN4,TBC1D22A,PIP4K2A,LMOD1,PMAIP1,ARHGEF19,UBQLN2,POT1,MAD2L1BP,CHMP2B,CELSR1,PDE4DIP,AUTS2,PRKAR1A,PRKCE,KDM4A,CTNNA2,…
GO: Biological Process	GO:0032507	maintenance of protein location in cell		3.562E-3	1.000E0	4.689E-2	4.568E-1	16	83	AKT1,ANK3,SPTBN4,SUN2,VPS13D,CLMN,NR5A1,SORL1,SYNE2,SYNE1,SUN1,PIP5K1C,HK1,PARK7,EZR,PINK1
GO: Biological Process	GO:0051050	positive regulation of transport		3.576E-3	1.000E0	4.693E-2	4.572E-1	134	1157	MBP,ADORA1,ADORA2A,SCAMP5,AKT1,USP36,ANK2,ANK3,TNFSF11,PHPT1,MYH10,MYLK,TNFRSF11A,NFE2L2,ZPR1,CACNA1I,CACNA1G,NMT1,CDK5R2,CACNA1C,CACNA1D,NPR1,NUMA1,CASQ1,SYT2,SYT7,OSM,OXCT1,OXTR,PRKN,CD81,CD151,HTR3B,CDH1,PIRT,PDGFRB,PDZK1,LIPG,PLA2G1B,PLCG1,PLCG2,PLTP,PMAIP1,CNTN1,AKAP6,SEPTIN5,PON1,PPT1,DNM3,PRKCE,MAP2K6,PTAFR,MAGI2,TNFSF15,PCSK9,DPP6,PDCD6IP,SGK2,ACE2,EPHB2,LRRK2,EHD2,CACNG3,ATP8A1,FCER1G,SC…
GO: Biological Process	GO:0010717	regulation of epithelial to mesenchymal transition		3.578E-3	1.000E0	4.693E-2	4.572E-1	18	98	ACVR1,AXIN2,DACT3,BMP7,LDLRAD4,DAB2IP,TRIM62,LEF1,ZNF703,SFRP1,PBLD,CLASP2,TBX5,TCF7L2,TIAM1,CRB2,SMAD3,SMAD7
GO: Biological Process	GO:0071407	cellular response to organic cyclic compound		3.580E-3	1.000E0	4.693E-2	4.572E-1	82	660	GRAMD1B,PARP1,AKT1,APP,ASS1,NCOA1,ATP1A1,ATP1A3,NPAS4,BMP7,KLF9,CACNA1S,NTRK2,NR4A2,OPRD1,PRKN,HTR3B,CDH1,PDE2A,PDE4D,PENK,CHRM3,TRIP4,SSH1,DDX54,AKAP6,NCOR2,RAPGEF2,PTAFR,NR2E3,KLF16,ELK1,LEF1,ESRRB,ESRRG,LRRK2,RXRB,ZBTB7A,CCL3,ZNF703,CIB2,SFRP1,ATG7,SLC5A5,SLC8A1,SLC8A3,SIRT2,ANKRD1,SMARCA4,FOXP1,NR5A1,GABRB1,SOX10,GDNF,STAT1,GLI2,GNAI3,GNAL,GNAS,GPLD1,RAPGEF1,NR2F1,NR2F2,GRIP1,THRA,AKAP13,HRH3…
GO: Biological Process	GO:0021987	cerebral cortex development		3.613E-3	1.000E0	4.721E-2	4.599E-1	23	137	NCOA1,MDGA1,BBS1,NRP2,CDK5R2,NTRK2,SUN2,CX3CR1,DAB2IP,DAB1,PTPRS,FAT4,FGF13,FGFR1,ATG7,DMRTA2,DISC1,SYNE2,SUN1,NR2F1,BMERB1,LAMB1,LRP1
GO: Biological Process	GO:0072089	stem cell proliferation		3.616E-3	1.000E0	4.721E-2	4.599E-1	24	145	FZD9,CITED1,NF2,NFYA,CX3CR1,LEF1,LRRK2,MECOM,FBLN1,ZNRF3,FGF13,FGFR1,FGFR2,SHB,DMRTA2,SOX5,SOX10,DISC1,ACSL6,TBX3,AKNA,WNT3,WNT7B,HMGA2
GO: Biological Process	GO:0042476	odontogenesis		3.616E-3	1.000E0	4.721E-2	4.599E-1	24	145	AXIN2,SLC24A4,MSX1,TNFSF11,BMP7,NF2,NFIC,TSPEAR,RUNX2,HACD1,SOSTDC1,HTRA1,EDA,LEF1,SCN5A,FGF8,FGFR2,SP6,GLI2,TCF7L2,WNT7B,BCL11B,ITGB4,LAMB1
GO: Biological Process	GO:1901214	regulation of neuron death		3.627E-3	1.000E0	4.728E-2	4.607E-1	53	394	MAP3K5,ADORA1,FZD9,ADORA2A,PARP1,AKT1,CITED1,ZPR1,CACNA1A,NTRK2,NR4A2,PRKN,CRLF1,SSH1,TMEM259,PITX3,RETREG1,PMAIP1,CNTFR,EGLN1,PPT1,CX3CR1,PTPRZ1,PCSK9,EFNB2,ELK1,EPHB1,LRRK2,KCNIP3,CCL3,FGF8,FGFR3,RRAS2,ATG7,ITSN1,HDAC7,FYN,SORL1,UNC5B,SRPK2,GDNF,KDM2B,TRIM2,GRID2,GRM4,ATP13A2,PARK7,HRAS,PINK1,ITPR1,KCNB1,KCNMA1,LRP1
GO: Biological Process	GO:0006629	lipid metabolic process		3.644E-3	1.000E0	4.744E-2	4.621E-1	166	1471	ABCA2,ABCA4,ABO,ACACB,ACADM,ADORA1,OSBPL6,OSBPL9,AKT1,ABCD1,ALDH3A2,PIK3R3,PLEKHA4,DGKE,APOD,APP,SCARF1,PLPP3,PDE8B,NCOA1,ATP1A1,B4GALT4,AUH,BBS1,BMPR1B,NEU2,SYNJ2,CYP26C1,NFYA,ACSF3,NPAS2,HACD2,MAP7,PIGQ,DGKI,CD81,PBX1,HACD1,LARGE1,PDGFRB,ENPP2,HAO1,B4GALT5,PCTP,CLCN2,SGMS1,PIK3C2B,PIK3C2G,LIPG,PIP4K2A,HSD17B13,PLA2G1B,ST8SIA5,PLCB3,PLCG1,PLCG2,PLTP,GAL3ST1,PTGES,PON1,NCOR2,PPT1,PLCH2,NUS1,PRKAB…
GO: Biological Process	GO:0043576	regulation of respiratory gaseous exchange		3.722E-3	1.000E0	4.795E-2	4.671E-1	7	23	ADORA1,TSHZ3,PHOX2A,NR4A2,PBX3,FTO,MTG2
GO: Biological Process	GO:0099188	postsynaptic cytoskeleton organization		3.722E-3	1.000E0	4.795E-2	4.671E-1	7	23	ACTG1,MYH10,ADGRB1,CAMK2B,INA,FARP1,PPP1R9A
GO: Biological Process	GO:1901889	negative regulation of cell junction assembly		3.722E-3	1.000E0	4.795E-2	4.671E-1	7	23	ACVRL1,MMP14,APOD,DLC1,CLASP2,CORO1C,LRP1
GO: Biological Process	GO:0086012	membrane depolarization during cardiac muscle cell action potential		3.722E-3	1.000E0	4.795E-2	4.671E-1	7	23	ANK2,ANK3,CACNA1G,CACNA1C,CACNA1D,SCN5A,SLC8A1
GO: Biological Process	GO:0060291	long-term synaptic potentiation		3.727E-3	1.000E0	4.795E-2	4.671E-1	19	106	ADORA1,ADORA2A,TSHZ3,APP,CAMK2B,NTRK2,IGSF11,CX3CR1,EPHA4,EPHB2,PPP1R9A,RGS14,SLC8A2,SLC8A3,SHANK2,GRIN2C,TNR,SHANK3,ITPR3
GO: Biological Process	GO:0060479	lung cell differentiation		3.738E-3	1.000E0	4.795E-2	4.671E-1	9	35	NFIB,NUMA1,SPDEF,NCOR2,FOXP4,FOXP1,THRA,FNDC3B,RBPJ
GO: Biological Process	GO:0030574	collagen catabolic process		3.746E-3	1.000E0	4.795E-2	4.671E-1	11	48	MMP14,MMP15,COL13A1,COL15A1,ADAMTS3,ADAMTS2,MMP28,ADAMTS14,CTSD,KLK6,MMP27
GO: Biological Process	GO:0045746	negative regulation of Notch signaling pathway		3.746E-3	1.000E0	4.795E-2	4.671E-1	11	48	AKT1,MMP14,BMP7,NOTCH4,NEURL1,DLL4,KCTD10,ZBTB7A,NRARP,NIBAN2,GDPD5
GO: Biological Process	GO:0031547	brain-derived neurotrophic factor receptor signaling pathway		3.768E-3	1.000E0	4.795E-2	4.671E-1	4	8	NTRK2,RAPGEF2,FSTL4,TIAM1
GO: Biological Process	GO:0034334	adherens junction maintenance		3.768E-3	1.000E0	4.795E-2	4.671E-1	4	8	PLEKHA7,MTSS1,RASSF8,KIFC3
GO: Biological Process	GO:0060372	regulation of atrial cardiac muscle cell membrane repolarization		3.768E-3	1.000E0	4.795E-2	4.671E-1	4	8	CACNA1D,SCN5A,KCNA5,KCNQ1
GO: Biological Process	GO:0060482	lobar bronchus development		3.768E-3	1.000E0	4.795E-2	4.671E-1	4	8	SPDEF,FOXP4,FOXP1,WNT7B
GO: Biological Process	GO:1905274	regulation of modification of postsynaptic actin cytoskeleton		3.768E-3	1.000E0	4.795E-2	4.671E-1	4	8	MYH10,BAIAP2,ITSN1,TIAM1
GO: Biological Process	GO:0060839	endothelial cell fate commitment		3.768E-3	1.000E0	4.795E-2	4.671E-1	4	8	ACVR1,PROX1,NR2F2,RBPJ
GO: Biological Process	GO:0006208	pyrimidine nucleobase catabolic process		3.768E-3	1.000E0	4.795E-2	4.671E-1	4	8	DPYD,DPYS,DPYSL4,DPYSL5
GO: Biological Process	GO:0048170	positive regulation of long-term neuronal synaptic plasticity		3.768E-3	1.000E0	4.795E-2	4.671E-1	4	8	NEURL1,EPHB2,SHANK3,KIT
GO: Biological Process	GO:0021626	central nervous system maturation		3.768E-3	1.000E0	4.795E-2	4.671E-1	4	8	ARCN1,CDK5R2,CACNA1A,CX3CR1
GO: Biological Process	GO:0071326	cellular response to monosaccharide stimulus		3.827E-3	1.000E0	4.863E-2	4.737E-1	27	170	PHPT1,PDE8B,CACNA1D,CACNA1E,BRSK2,OXCT1,PRKN,CDK16,PDE1C,PRKCE,ZBTB20,PTPRN2,LIN28A,SIDT2,ATG7,RAB11FIP2,SLC2A5,SMARCA4,GJB6,GPLD1,TCF7L2,TIAM1,IGF1R,C1QTNF12,KCNB1,LRP1,LRP5
GO: Biological Process	GO:0008542	visual learning		3.833E-3	1.000E0	4.865E-2	4.739E-1	14	69	MEIS2,APP,PDE8B,ATP1A3,AP1S2,CACNA1C,CACNA1E,ATXN1,RGS14,ABCC8,TAFA2,HRH1,TANC1,KIT
GO: Biological Process	GO:0021695	cerebellar cortex development		3.894E-3	1.000E0	4.935E-2	4.807E-1	13	62	ARCN1,MYH10,NEUROD2,NFIX,CACNA1A,PROX1,RFX4,ATXN2,ATG7,ZNF365,GLI2,GRID2,SEZ6L
GO: Cellular Component	GO:0045202	synapse		3.138E-31	3.465E-28	3.465E-28	2.628E-27	271	1482	ABHD17A,MAP1B,ACTG1,BTBD9,TENM2,DSCAML1,PPM1H,ADORA1,FZD9,ADORA2A,LRFN2,SCAMP5,SORCS2,AKT1,VPS18,ANK1,ANK2,ANK3,GIT1,PPFIA4,APBA1,APBA2,APBB2,DGKE,BCAS1,PPFIA3,APP,AP3B1,MADD,TMEM108,ATP1A1,ATP1A3,MDGA1,NPAS4,CADM3,MYH10,KIF1A,ADGRB1,ADGRB3,NAPA,NRP2,NF2,SYNJ2,AP1S2,BSN,WASF1,SDK1,CACNA1A,CACNA1C,CACNA1D,CACNA1E,CACNA1S,NSF,CAMK2B,NTRK2,ROR1,BRSK2,CAPZB,IGSF11,SYT2,SYT7,OPRD1,SHISA9,INA,NEURL1,DG…
GO: Cellular Component	GO:0043005	neuron projection		1.226E-28	1.354E-25	6.769E-26	5.134E-25	282	1624	ABHD17A,ABCA4,ACADM,MAP1B,MAP6,MBP,ACTG1,ACVRL1,GPRIN1,ADA,TENM2,DSCAML1,ADCY9,ADORA1,ADORA2A,UNC5A,SEMA6A,TSHZ3,ANK1,ANK2,ANK3,GIT1,APBA1,APBA2,APBB2,APOD,APP,AP3B1,CPNE5,CDC14A,MADD,SPTBN4,ARHGAP4,ARL3,ASS1,NCOA1,TMEM108,ATP1A3,MYH10,MYO1D,KIF1A,MYO10,ADGRB1,NRP2,MYO3A,BMPR1B,NF2,SYNJ2,NFIB,ZPR1,CACNA1G,BSN,WASF1,CDK5R2,CACNA1A,CACNA1C,CACNA1D,CACNA1S,NSF,CAMK2B,NTRK2,ROR1,NUMA1,BRSK2,CAPZB,TSP…
GO: Cellular Component	GO:0030054	cell junction		1.488E-27	1.643E-24	5.475E-25	4.153E-24	245	1352	ABHD17A,MAP1B,MCAM,ACTG1,ADA,TENM2,DSCAML1,HEG1,LRFN2,SCAMP5,AKT1,MMP14,ARHGAP21,SHROOM3,ANK2,ANK3,GIT1,EPB41L5,APP,MYZAP,SPTBN4,MAPK15,PLPP3,SKAP1,TMEM108,ATP1A1,RAP2C,CADM3,MYLK,MYO1E,ADGRB1,NF2,AJM1,NHS,BSN,PLEKHA7,WASF1,SDK1,NPHS1,CACNA1C,NRAP,LIMD1,CAMK2B,CAPZB,IGSF11,SYT2,SYT7,SHISA9,CLDN24,OXTR,CD9,NEURL1,PRKN,CD81,CD151,CDH1,PCDH9,CDH11,CDH13,LGI1,CDK16,MAGI1,DLGAP2,DLGAP1,PDGFRB,CYTH2,PA…
GO: Cellular Component	GO:0036477	somatodendritic compartment		5.278E-26	5.827E-23	1.457E-23	1.105E-22	208	1096	ABHD17A,MAP1B,MAP6,MBP,ACVRL1,ADA,TENM2,ADCY9,ADORA1,ADORA2A,UNC5A,ANK3,ENC1,APBA1,APBA2,APOD,APP,CPNE5,SPTBN4,ASS1,TMEM108,ATP1A3,MYH10,MYO1D,KIF1A,MYO10,ADGRB1,BMPR1B,ZPR1,CACNA1G,BSN,WASF1,CACNA1A,CACNA1C,CACNA1D,CACNA1E,CACNA1S,NSF,CAMK2B,NTRK2,NUMA1,CAPZB,SYT7,OPRD1,NEURL1,CD40,DGKI,PRKN,HTR3B,DLGAP2,PDE1C,PDE2A,ENPP1,PENK,CHRM3,DLGAP3,CLCN2,PITX3,ATXN10,CNGA3,CNN3,NECAB2,SLC31A1,TBX21,PPT1,…
GO: Cellular Component	GO:0097060	synaptic membrane		8.769E-23	9.681E-20	1.768E-20	1.341E-19	125	548	ABHD17A,TENM2,ADORA1,ADORA2A,LRFN2,ANK1,ANK2,ANK3,APBA1,TMEM108,ATP1A3,CADM3,ADGRB1,NRP2,BSN,CACNA1A,CACNA1C,CACNA1D,CACNA1E,NTRK2,SYT7,OPRD1,SHISA9,NEURL1,DGKI,PRKN,HTR3B,DLGAP2,DLGAP1,PDE2A,CYTH2,CHRM3,DLGAP3,LRFN4,NRXN3,NRXN2,OTOF,CLTA,CNTN1,COL13A1,GABBR2,DNM3,ERC2,CTNNA2,SNPH,CNIH3,MAGI2,PTPRO,PTPRS,PTPRZ1,DLG2,DLG3,IQSEC3,EFNB2,FARP1,ENO2,EPB41L1,EPHA4,EPHB2,STX2,PI4K2A,CACNG3,SCN8A,GPC4,BA…
GO: Cellular Component	GO:0098794	postsynapse		9.611E-23	1.061E-19	1.768E-20	1.341E-19	164	825	ABHD17A,MAP1B,ACTG1,TENM2,ADORA1,FZD9,ADORA2A,LRFN2,SORCS2,AKT1,ANK1,ANK2,ANK3,GIT1,APBA1,APBA2,BCAS1,APP,TMEM108,ATP1A1,ATP1A3,NPAS4,MYH10,KIF1A,ADGRB1,ADGRB3,NAPA,NRP2,BSN,WASF1,CACNA1C,CACNA1E,CACNA1S,NSF,CAMK2B,NTRK2,CAPZB,IGSF11,SYT7,OPRD1,SHISA9,INA,NEURL1,DGKI,PRKN,HTR3B,CDH1,DLGAP2,DLGAP1,CYTH2,CHRM3,DLGAP3,LRFN4,SSH1,CLTA,PLCB3,CNN3,CNTN1,COL13A1,EGLN1,GABBR2,CHMP2B,DNM3,ERC2,CTNNA2,TANC…
GO: Cellular Component	GO:0030424	axon		6.197E-22	6.842E-19	9.774E-20	7.413E-19	161	817	ACADM,MAP1B,MAP6,MBP,ACTG1,GPRIN1,TENM2,DSCAML1,ADCY9,ADORA1,ADORA2A,SEMA6A,TSHZ3,ANK1,ANK2,ANK3,GIT1,APBB2,APP,AP3B1,MADD,SPTBN4,ARHGAP4,TMEM108,ATP1A3,MYH10,MYO1D,KIF1A,NRP2,SYNJ2,NFIB,ZPR1,BSN,CDK5R2,NTRK2,ROR1,BRSK2,CAPZB,SYT2,MAP7,SYT7,OPRD1,CD40,DGKI,PRKN,HTR3B,CDH1,PCDH9,PRTG,PDE2A,CYTH2,PENK,CHRM3,SSH1,CNGA3,NECAB2,SEPTIN5,IRX3,AATK,PPT1,DNM3,AUTS2,ERC2,PRKCB,CTNNA2,DAB2IP,BOC,GIT2,DCTN1,…
GO: Cellular Component	GO:0044297	cell body		4.002E-20	4.418E-17	5.522E-18	4.188E-17	157	820	MAP1B,ACTA1,MBP,ACVRL1,ADA,RNF157,ADORA1,ADORA2A,UNC5A,ENC1,APOD,APP,CPNE5,SPTBN4,ASS1,ATP1A3,MYH10,MYO1D,KIF1A,MYO10,BMPR1B,NF2,ZPR1,CACNA1G,BSN,CACNA1A,CACNA1C,CACNA1D,CACNA1E,CAMK2B,NTRK2,NUMA1,CAPZB,SYT7,NEURL1,CD40,DGKI,PRKN,HTR3B,PDE1C,ENPP1,PENK,DLGAP3,CLCN2,PITX3,ATXN10,CNGA3,CNN3,SLC31A1,PODXL,TBX21,PPT1,ERC2,FEV,RAPGEF2,CX3CR1,DAB2IP,BOC,SNPH,DAB1,DCTN1,PTPRS,PTPRZ1,PURA,DLG2,DLG3,DNMT1…
GO: Cellular Component	GO:0045211	postsynaptic membrane		5.399E-20	5.961E-17	6.623E-18	5.023E-17	98	405	ABHD17A,TENM2,ADORA1,ADORA2A,LRFN2,ANK1,ANK2,ANK3,TMEM108,ADGRB1,NRP2,CACNA1C,CACNA1E,NTRK2,OPRD1,SHISA9,NEURL1,DGKI,PRKN,HTR3B,DLGAP2,DLGAP1,CYTH2,CHRM3,DLGAP3,LRFN4,CNTN1,COL13A1,GABBR2,DNM3,CTNNA2,CNIH3,MAGI2,PTPRO,PTPRS,PTPRZ1,DLG2,DLG3,IQSEC3,EFNB2,FARP1,EPHA4,EPHB2,CACNG3,SCN8A,SLURP2,SEMA4F,SHC4,CNKSR2,CLSTN1,RPH3A,SLC6A1,SLC6A8,SLC6A9,SLC6A11,RGS14,SLC8A2,SLC8A1,SLC8A3,SHANK2,SORCS3,CACNG…
GO: Cellular Component	GO:0097447	dendritic tree		1.681E-19	1.856E-16	1.688E-17	1.280E-16	150	779	ABHD17A,MAP1B,MAP6,ACVRL1,ADA,TENM2,ADCY9,ADORA1,ADORA2A,ANK3,APBA1,APBA2,APOD,APP,TMEM108,ATP1A3,MYH10,MYO1D,KIF1A,ADGRB1,BMPR1B,CACNA1G,BSN,WASF1,CACNA1A,CACNA1C,CACNA1D,CACNA1S,NSF,CAMK2B,NTRK2,NUMA1,CAPZB,SYT7,OPRD1,NEURL1,DGKI,DLGAP2,PDE2A,ENPP1,PENK,CHRM3,DLGAP3,CLCN2,ATXN10,CNGA3,CNN3,NECAB2,PPT1,DNM3,CTNNA2,CX3CR1,DAB2IP,CNIH3,MAGI2,PTPRO,PTPRZ1,PURA,DLG2,DLG3,CNNM1,FARP1,TNK2,ELK1,EPHA4,…
GO: Cellular Component	GO:0030425	dendrite		1.681E-19	1.856E-16	1.688E-17	1.280E-16	150	779	ABHD17A,MAP1B,MAP6,ACVRL1,ADA,TENM2,ADCY9,ADORA1,ADORA2A,ANK3,APBA1,APBA2,APOD,APP,TMEM108,ATP1A3,MYH10,MYO1D,KIF1A,ADGRB1,BMPR1B,CACNA1G,BSN,WASF1,CACNA1A,CACNA1C,CACNA1D,CACNA1S,NSF,CAMK2B,NTRK2,NUMA1,CAPZB,SYT7,OPRD1,NEURL1,DGKI,DLGAP2,PDE2A,ENPP1,PENK,CHRM3,DLGAP3,CLCN2,ATXN10,CNGA3,CNN3,NECAB2,PPT1,DNM3,CTNNA2,CX3CR1,DAB2IP,CNIH3,MAGI2,PTPRO,PTPRZ1,PURA,DLG2,DLG3,CNNM1,FARP1,TNK2,ELK1,EPHA4,…
GO: Cellular Component	GO:0098978	glutamatergic synapse		4.187E-19	4.622E-16	3.852E-17	2.921E-16	112	511	ABHD17A,TENM2,PPM1H,FZD9,ADORA2A,VPS18,GIT1,APBA1,DGKE,PPFIA3,MYH10,ADGRB1,NAPA,NRP2,BSN,CACNA1A,CACNA1C,CAMK2B,NTRK2,SYT7,SHISA9,INA,DGKI,CDH1,CDH11,LGI1,DLGAP1,CHRM3,ARHGAP22,DLGAP3,LRFN4,CLTA,PLCG1,EGLN1,NRG2,GABBR2,CHMP2B,DNM3,PRKAR1A,ERC2,PRKCE,CTBP2,TANC2,CNIH3,MAGI2,PTPRO,PTPRS,PTPRZ1,PURA,DLG2,DLG3,GPC6,EFNB2,FARP1,EPHA4,EPHB1,EPHB2,RPL22,EPS8,LRRK2,CACNG3,SCN8A,GPC4,BAIAP2,SEMA3F,ITSN1,D…
GO: Cellular Component	GO:0043025	neuronal cell body		2.135E-18	2.357E-15	1.813E-16	1.375E-15	141	732	MAP1B,MBP,ACVRL1,ADA,ADORA1,ADORA2A,UNC5A,ENC1,APOD,APP,CPNE5,SPTBN4,ASS1,ATP1A3,MYH10,MYO1D,KIF1A,MYO10,BMPR1B,ZPR1,CACNA1G,BSN,CACNA1A,CACNA1C,CACNA1D,CACNA1E,CAMK2B,NTRK2,NUMA1,CAPZB,SYT7,NEURL1,CD40,DGKI,PRKN,HTR3B,PDE1C,ENPP1,PENK,DLGAP3,CLCN2,PITX3,ATXN10,CNGA3,CNN3,SLC31A1,TBX21,PPT1,ERC2,FEV,RAPGEF2,CX3CR1,DAB2IP,BOC,SNPH,DAB1,DCTN1,PTPRS,PTPRZ1,PURA,DLG2,DLG3,DNMT1,PDE11A,DPP6,EEF1A2,CNN…
GO: Cellular Component	GO:0098984	neuron to neuron synapse		1.790E-17	1.977E-14	1.412E-15	1.071E-14	100	452	ABHD17A,MAP1B,ADORA1,ADORA2A,LRFN2,SORCS2,ANK2,BCAS1,TMEM108,ATP1A1,ATP1A3,ADGRB1,BSN,CACNA1C,CACNA1S,NSF,CAMK2B,NTRK2,CAPZB,IGSF11,SYT7,OPRD1,SHISA9,NEURL1,DGKI,PRKN,DLGAP2,DLGAP1,PENK,CHRM3,DLGAP3,LRFN4,CNN3,EGLN1,CHMP2B,DNM3,ERC2,CTNNA2,TANC2,DAB1,MAGI2,PTPRO,PTPRS,PTPRZ1,PURA,DLG2,DLG3,IQSEC3,EFNB2,EPB41L1,RPL8,EPHA4,EPS8,CACNG3,SCN8A,BAIAP2,CAP2,SEMA4F,PPP1R9A,SH3GL3,ARFGEF2,ADGRL1,CNKSR2,CL…
GO: Cellular Component	GO:0014069	postsynaptic density		2.216E-17	2.447E-14	1.529E-15	1.160E-14	96	426	ABHD17A,MAP1B,ADORA1,ADORA2A,LRFN2,SORCS2,ANK2,BCAS1,TMEM108,ATP1A1,ATP1A3,ADGRB1,BSN,CACNA1C,CACNA1S,NSF,CAMK2B,NTRK2,CAPZB,IGSF11,OPRD1,SHISA9,NEURL1,DGKI,PRKN,DLGAP2,DLGAP1,CHRM3,DLGAP3,LRFN4,CNN3,EGLN1,CHMP2B,DNM3,ERC2,CTNNA2,TANC2,DAB1,MAGI2,PTPRO,PTPRS,PTPRZ1,PURA,DLG2,DLG3,IQSEC3,EFNB2,EPB41L1,RPL8,EPHA4,EPS8,CACNG3,SCN8A,BAIAP2,CAP2,SEMA4F,PPP1R9A,SH3GL3,ARFGEF2,ADGRL1,CNKSR2,CLSTN1,SLC6A…
GO: Cellular Component	GO:0032279	asymmetric synapse		2.216E-17	2.447E-14	1.529E-15	1.160E-14	96	426	ABHD17A,MAP1B,ADORA1,ADORA2A,LRFN2,SORCS2,ANK2,BCAS1,TMEM108,ATP1A1,ATP1A3,ADGRB1,BSN,CACNA1C,CACNA1S,NSF,CAMK2B,NTRK2,CAPZB,IGSF11,OPRD1,SHISA9,NEURL1,DGKI,PRKN,DLGAP2,DLGAP1,CHRM3,DLGAP3,LRFN4,CNN3,EGLN1,CHMP2B,DNM3,ERC2,CTNNA2,TANC2,DAB1,MAGI2,PTPRO,PTPRS,PTPRZ1,PURA,DLG2,DLG3,IQSEC3,EFNB2,EPB41L1,RPL8,EPHA4,EPS8,CACNG3,SCN8A,BAIAP2,CAP2,SEMA4F,PPP1R9A,SH3GL3,ARFGEF2,ADGRL1,CNKSR2,CLSTN1,SLC6A…
GO: Cellular Component	GO:0099572	postsynaptic specialization		7.345E-17	8.109E-14	4.770E-15	3.618E-14	100	461	ABHD17A,MAP1B,ADORA1,ADORA2A,LRFN2,SORCS2,ANK2,BCAS1,TMEM108,ATP1A1,ATP1A3,ADGRB1,BSN,CACNA1C,CACNA1S,NSF,CAMK2B,NTRK2,CAPZB,IGSF11,OPRD1,SHISA9,NEURL1,DGKI,PRKN,DLGAP2,DLGAP1,CYTH2,CHRM3,DLGAP3,LRFN4,CNN3,EGLN1,CHMP2B,DNM3,ERC2,CTNNA2,TANC2,DAB1,MAGI2,PTPRO,PTPRS,PTPRZ1,PURA,DLG2,DLG3,IQSEC3,EFNB2,EPB41L1,RPL8,EPHA4,EPS8,CACNG3,SCN8A,BAIAP2,CAP2,SEMA4F,DLGAP4,PPP1R9A,SH3GL3,ARFGEF2,ADGRL1,CNKSR2…
GO: Cellular Component	GO:0098793	presynapse		2.113E-15	2.333E-12	1.296E-13	9.830E-13	129	699	ACTG1,BTBD9,ADORA1,ADORA2A,SCAMP5,VPS18,GIT1,PPFIA4,APBA1,APBA2,PPFIA3,APP,AP3B1,MADD,ATP1A3,CADM3,KIF1A,NAPA,SYNJ2,AP1S2,BSN,CACNA1A,CACNA1C,CACNA1D,CACNA1E,NTRK2,ROR1,BRSK2,CAPZB,SYT2,SYT7,OPRD1,DGKI,PRKN,CDH1,CDK16,PDE2A,PENK,CHRM3,NRXN3,NRXN2,OTOF,CLTA,CNTN1,SEPTIN5,GABBR2,CELSR1,PPT1,DNM3,ERC2,PRKCB,PRKCE,CTBP2,FEV,CTNNA2,SNPH,GIT2,MAGI2,PTPRN2,PTPRS,EFNB2,ELK1,RHOT1,EPHA4,EPHB2,RPL22,STX2,L…
GO: Cellular Component	GO:0031226	intrinsic component of plasma membrane		2.950E-15	3.257E-12	1.714E-13	1.300E-12	259	1790	ABHD17A,KCNH7,ABCA4,SLC24A3,ACVR1,ACVRL1,TENM2,ADCY9,ADORA1,ADORA2A,UNC5A,LRFN2,SLC24A4,SORCS2,SEMA6A,MMP14,MMP15,ANK2,SLC25A5,APP,SEMA4G,IGDCC4,TNFSF11,PLPP3,KCNK5,ATP1A1,ATP1A3,SLC4A4,MDGA1,MUC1,MARCO,CADM3,ABCC3,ADGRB1,ADGRB2,ADGRB3,NRP2,BMPR1B,ADGRD1,NOTCH2,NOTCH4,NPHS1,CACNA1A,CACNA1C,CACNA1D,CACNA1E,NPR2,CACNG1,SLC11A2,NTRK2,ROR1,SLC7A7,SYT7,OPRD1,SHISA9,OXTR,CD9,CD40,SLC28A1,CD81,CD151,HTR…
GO: Cellular Component	GO:0005887	integral component of plasma membrane		5.315E-15	5.867E-12	2.934E-13	2.225E-12	249	1710	KCNH7,ABCA4,SLC24A3,ACVR1,ACVRL1,TENM2,ADCY9,ADORA1,ADORA2A,LRFN2,SLC24A4,SORCS2,SEMA6A,MMP14,MMP15,ANK2,SLC25A5,APP,SEMA4G,IGDCC4,TNFSF11,PLPP3,KCNK5,ATP1A1,ATP1A3,SLC4A4,MUC1,MARCO,CADM3,ABCC3,ADGRB1,ADGRB2,ADGRB3,NRP2,BMPR1B,ADGRD1,NOTCH2,NOTCH4,NPHS1,CACNA1A,CACNA1C,CACNA1D,CACNA1E,NPR2,CACNG1,SLC11A2,NTRK2,ROR1,SLC7A7,SYT7,OPRD1,SHISA9,OXTR,CD9,CD40,SLC28A1,CD81,CD151,HTR3B,PCDH9,PDGFRB,ENPP…
GO: Cellular Component	GO:0150034	distal axon		2.512E-13	2.773E-10	1.321E-11	1.002E-10	88	432	MAP1B,ACTG1,GPRIN1,TENM2,ADORA1,TSHZ3,GIT1,APBB2,APP,ARHGAP4,ATP1A3,MYH10,SYNJ2,ZPR1,BSN,CDK5R2,NTRK2,ROR1,BRSK2,CAPZB,SYT7,OPRD1,DGKI,PRKN,CDH1,PCDH9,CYTH2,PENK,CHRM3,SSH1,SEPTIN5,AATK,AUTS2,ERC2,PRKCB,CTNNA2,BOC,GIT2,TIAM2,PTPRN2,PTPRO,PTPRZ1,DLG3,CRTAC1,MYH14,TNK2,ELK1,ENO2,EPHA4,EPS8,LRRK2,KCNIP3,FGF13,ITSN1,PPP1R9A,ADGRL1,TRAK1,SLC6A9,SIRT2,SHANK2,KIF21B,DISC1,CLASP2,MAPK8IP3,NMU,GHRH,GOT1,R…
GO: Cellular Component	GO:0005911	cell-cell junction		2.796E-13	3.087E-10	1.403E-11	1.064E-10	98	506	TENM2,HEG1,AKT1,SHROOM3,ANK2,ANK3,APP,SPTBN4,MAPK15,SKAP1,ATP1A1,RAP2C,CADM3,MYLK,MYO1E,ADGRB1,NHS,PLEKHA7,NPHS1,NRAP,LIMD1,CAPZB,IGSF11,CLDN24,OXTR,CDH1,PCDH9,CDH11,CDH13,MAGI1,CYTH2,AHNAK,PKP1,TJP2,PLCG1,IQGAP3,CNN3,AKAP6,COL13A1,PODXL,MXRA8,CSK,DEF6,PRKCH,CTNNA2,RAPGEF2,JAML,PTK7,MAGI2,RASIP1,PTPRM,NECTIN2,DLG3,DPP4,PDCD6IP,DSG2,PATJ,STX2,OBSCN,FABP7,SCN5A,FGF13,BAIAP2,FRMD4A,SLC8A1,SIRT2,GAB1…
GO: Cellular Component	GO:0031252	cell leading edge		3.729E-11	4.116E-8	1.790E-9	1.357E-8	85	449	ACTA1,ADORA1,ADORA2A,UNC5A,ANK1,SH3RF1,APBB2,EPB41L5,GAS7,APP,SKAP1,MYH10,MYLK,MYO1D,MYO10,KSR1,NF2,SYNJ2,NHS,WASF1,CACNA1D,CAPZB,OPRD1,SHISA9,CDH1,CYTH2,PARVB,SSH1,PLCG1,PODXL,DUOX2,BCAR1,CSPG4,CTNNA2,PIEZO1,MTSS1,AIF1L,DCTN1,TIAM2,PTPRM,PTPRO,PTPRZ1,DPP4,MTSS2,STX2,EPS8,APC2,DLC1,BAIAP2,LIMA1,ITSN1,PPP1R9A,ASAP3,ABLIM3,SLC1A2,RAB3IP,GABRE,CLASP2,FRMD4B,MAPK8IP3,KANK1,FGD4,SYNE2,GNAS,WWC1,CARMIL…
GO: Cellular Component	GO:0099240	intrinsic component of synaptic membrane		1.536E-10	1.696E-7	7.067E-9	5.360E-8	55	244	ABHD17A,ADORA1,ADORA2A,LRFN2,ATP1A3,CADM3,ADGRB1,NRP2,CACNA1A,CACNA1C,CACNA1D,CACNA1E,SYT7,OPRD1,SHISA9,CHRM3,LRFN4,CNTN1,GABBR2,PTPRO,PTPRS,PTPRZ1,DLG2,EFNB2,EPHA4,EPHB2,CACNG3,SCN8A,GPC4,ADGRL1,CLSTN1,SLC1A2,SLC6A1,SLC6A8,SLC6A9,SLC6A11,SLC8A2,SLC8A1,SLC8A3,SORCS3,CACNG5,CLSTN2,LRRC4,SLITRK2,GRID2,GRIK4,GRM4,CADM1,FLRT3,HTR2A,KCND3,KCNH1,KCNJ6,KCNMA1,CHRNA10
GO: Cellular Component	GO:0030427	site of polarized growth		1.656E-10	1.828E-7	7.314E-9	5.547E-8	53	231	MAP1B,GPRIN1,TENM2,TSHZ3,APBB2,APP,ARHGAP4,MYH10,ZPR1,CDK5R2,NTRK2,PCDH9,CYTH2,SSH1,AATK,AUTS2,ERC2,BOC,TIAM2,PTPRO,PTPRZ1,DLG3,CRTAC1,MYH14,TNK2,ENO2,EPHA4,EPS8,LRRK2,PI4K2A,FGF13,PPP1R9A,ADGRL1,TRAK1,SIRT2,SHANK2,KIF21B,DISC1,CLASP2,MAPK8IP3,RAPGEF4,TIAM1,TPM3,FLRT3,UTRN,IGHMBP2,PINK1,LAMP5,GDPD5,KIF5A,KIF5C,LRP1,CCDC120
GO: Cellular Component	GO:0030426	growth cone		2.204E-10	2.434E-7	9.361E-9	7.099E-8	52	226	MAP1B,GPRIN1,TENM2,TSHZ3,APBB2,APP,ARHGAP4,MYH10,ZPR1,CDK5R2,NTRK2,PCDH9,CYTH2,SSH1,AATK,AUTS2,ERC2,BOC,TIAM2,PTPRO,PTPRZ1,DLG3,CRTAC1,MYH14,TNK2,ENO2,EPHA4,EPS8,LRRK2,FGF13,PPP1R9A,ADGRL1,TRAK1,SIRT2,SHANK2,KIF21B,DISC1,CLASP2,MAPK8IP3,RAPGEF4,TIAM1,TPM3,FLRT3,UTRN,IGHMBP2,PINK1,LAMP5,GDPD5,KIF5A,KIF5C,LRP1,CCDC120
GO: Cellular Component	GO:0099699	integral component of synaptic membrane		6.792E-10	7.498E-7	2.777E-8	2.106E-7	51	226	ADORA1,ADORA2A,LRFN2,ATP1A3,CADM3,ADGRB1,NRP2,CACNA1A,CACNA1C,CACNA1D,CACNA1E,SYT7,OPRD1,SHISA9,CHRM3,LRFN4,GABBR2,PTPRO,PTPRS,PTPRZ1,EFNB2,EPHA4,EPHB2,CACNG3,SCN8A,ADGRL1,CLSTN1,SLC1A2,SLC6A1,SLC6A8,SLC6A9,SLC6A11,SLC8A2,SLC8A1,SLC8A3,SORCS3,CACNG5,CLSTN2,LRRC4,SLITRK2,GRID2,GRIK4,GRM4,CADM1,FLRT3,HTR2A,KCND3,KCNH1,KCNJ6,KCNMA1,CHRNA10
GO: Cellular Component	GO:0044309	neuron spine		1.008E-9	1.113E-6	3.975E-8	3.015E-7	54	249	ABHD17A,MAP1B,TENM2,ADORA1,APBA1,APBA2,APP,ATP1A3,MYH10,ADGRB1,BSN,CACNA1S,NTRK2,CAPZB,SYT7,OPRD1,NEURL1,DGKI,DLGAP2,DLGAP3,CNN3,DNM3,CTNNA2,PTPRO,PTPRZ1,FARP1,EPHA4,BAIAP2,ITSN1,PPP1R9A,ARFGEF2,CLSTN1,SLC1A2,SLC1A3,RPH3A,SLC6A9,RGS14,SLC8A2,SLC8A1,SLC8A3,SHANK2,LRRC4,STRN,SYNE1,RAPGEF4,GRID2,GRIK4,TIAM1,GRIP2,TNR,HPCA,SHANK3,ANKS1B,GRID2IP
GO: Cellular Component	GO:0070161	anchoring junction		1.171E-9	1.293E-6	4.458E-8	3.381E-7	97	575	MCAM,ACTG1,MMP14,SHROOM3,GIT1,EPB41L5,SPTBN4,PLPP3,MYO1E,ADGRB1,NF2,AJM1,NHS,PLEKHA7,WASF1,NPHS1,NRAP,LIMD1,OXTR,CD9,CD81,CD151,CDH1,CDH11,CDH13,MAGI1,PDGFRB,CYTH2,PARVB,ARHGAP22,AHNAK,PKP1,TJP2,CNN3,BCAR1,CSPG4,CTNNA2,ARHGAP24,MTSS1,AIF1L,GIT2,PTK7,PTPRM,NECTIN2,DPP4,PDCD6IP,DSG2,ARPC1B,EFNB2,TNK2,RPL8,EPHA4,RPL22,RSU1,DLC1,FMN1,FGFR3,BAIAP2,RRAS2,LIMA1,CIB2,ASAP3,FRMD4A,NFASC,CLASP2,FRMD4B,TSPA…
GO: Cellular Component	GO:0005912	adherens junction		1.292E-9	1.427E-6	4.756E-8	3.607E-7	95	560	MCAM,ACTG1,MMP14,SHROOM3,GIT1,EPB41L5,SPTBN4,PLPP3,MYO1E,ADGRB1,NF2,AJM1,NHS,PLEKHA7,WASF1,NPHS1,NRAP,LIMD1,OXTR,CD9,CD81,CD151,CDH1,CDH11,CDH13,MAGI1,PDGFRB,CYTH2,PARVB,ARHGAP22,AHNAK,PKP1,TJP2,CNN3,BCAR1,CSPG4,CTNNA2,ARHGAP24,MTSS1,AIF1L,GIT2,PTK7,PTPRM,NECTIN2,DPP4,PDCD6IP,ARPC1B,EFNB2,TNK2,RPL8,EPHA4,RPL22,RSU1,DLC1,FMN1,FGFR3,BAIAP2,RRAS2,LIMA1,CIB2,ASAP3,FRMD4A,NFASC,CLASP2,FRMD4B,TSPAN9,AJ…
GO: Cellular Component	GO:0043197	dendritic spine		1.353E-9	1.494E-6	4.820E-8	3.656E-7	53	244	ABHD17A,MAP1B,TENM2,ADORA1,APBA1,APBA2,APP,ATP1A3,MYH10,ADGRB1,BSN,CACNA1S,NTRK2,CAPZB,SYT7,OPRD1,NEURL1,DGKI,DLGAP2,DLGAP3,CNN3,DNM3,CTNNA2,PTPRO,PTPRZ1,FARP1,EPHA4,BAIAP2,ITSN1,PPP1R9A,ARFGEF2,CLSTN1,SLC1A2,SLC1A3,RPH3A,SLC6A9,RGS14,SLC8A2,SLC8A1,SLC8A3,SHANK2,LRRC4,STRN,SYNE1,RAPGEF4,GRID2,GRIK4,TIAM1,TNR,HPCA,SHANK3,ANKS1B,GRID2IP
GO: Cellular Component	GO:0034703	cation channel complex		1.784E-9	1.970E-6	6.155E-8	4.668E-7	51	232	CATSPERG,CACNA1I,CACNA1G,CACNA1A,CACNA1C,CACNA1D,CACNA1E,CACNA1S,CACNG1,SHISA9,HTR3B,PDE4D,CACNA2D2,DLGAP3,AKAP6,CATSPERZ,CNIH3,DLG2,DLG3,MCUB,DPP6,EPS8,KCNIP3,KCNIP1,CACNG3,SCN4A,SCN5A,SCN8A,CACNG5,ABCC8,GRIK3,GRIK4,GRIN2C,CATSPERD,TRPC4,PORCN,KCNA5,KCNA7,KCNB1,KCND3,KCNG1,KCNH1,KCNH2,KCNJ6,KCNMA1,KCNN1,KCNN4,KCNQ1,KCNAB1,KCNQ3,TRPC7
GO: Cellular Component	GO:0098936	intrinsic component of postsynaptic membrane		1.945E-9	2.147E-6	6.431E-8	4.877E-7	43	179	ABHD17A,ADORA1,ADORA2A,LRFN2,ADGRB1,NRP2,CACNA1C,CACNA1E,OPRD1,SHISA9,CHRM3,LRFN4,CNTN1,GABBR2,PTPRO,PTPRS,PTPRZ1,DLG2,EFNB2,EPHA4,EPHB2,CACNG3,SCN8A,CLSTN1,SLC6A1,SLC6A8,SLC6A9,SLC6A11,SLC8A2,SLC8A1,SLC8A3,SORCS3,CACNG5,CLSTN2,LRRC4,SLITRK2,GRID2,GRIK4,CADM1,FLRT3,HTR2A,KCND3,CHRNA10
GO: Cellular Component	GO:0099568	cytoplasmic region		1.980E-9	2.186E-6	6.431E-8	4.877E-7	110	687	MAP6,ADA,MICAL3,MOBP,SHROOM3,ANK1,PPFIA3,MYZAP,AP3B1,CDC14A,MADD,SPTBN4,ARL3,MAPK15,TMEM108,CATSPERG,MYH10,MYO1D,KIF1A,MYO1E,MYO10,BBS1,NF2,BSN,WASF1,NUMA1,CAPZB,ODF2,TTLL8,DNAAF1,CDH1,CFAP251,CFAP54,CLTA,CATSPERZ,SEPTIN5,PRKAR1A,ERC2,CTBP2,RAI14,CTNNA2,CFAP61,IFT140,TRAF3IP1,IFT172,DCTN1,MELK,PURA,DLG2,DNAH6,DNAH8,DNAH9,CFAP69,ENO2,MTSS2,EPS8,LRRK2,DLC1,FGF1,FGFR2,BAIAP2,CAP2,CIB2,ATG7,PPP1R9A,A…
GO: Cellular Component	GO:1902495	transmembrane transporter complex		3.465E-9	3.826E-6	1.093E-7	8.290E-7	65	337	ABCA2,ATP1A1,ATP1A3,CATSPERG,CACNA1I,CACNA1G,CACNA1A,CACNA1C,CACNA1D,CACNA1E,CACNA1S,CACNG1,CLIC6,SHISA9,HTR3B,PDE4D,CACNA2D2,BEST3,DLGAP3,CLCN2,CNGA3,AKAP6,CATSPERZ,CNIH3,DLG2,DLG3,MCUB,DPP6,EPS8,KCNIP3,KCNIP1,CACNG3,SCN4A,SCN5A,SCN8A,SHANK2,CACNG5,GABRB1,GABRE,ABCC8,GRID2,GRIK3,GRIK4,TTYH3,GRIN2C,CATSPERD,TRPC4,PORCN,SHANK3,KCNA5,KCNA7,KCNB1,KCND3,KCNG1,KCNH1,KCNH2,KCNJ6,KCNMA1,KCNN1,KCNN4,KCNQ…
GO: Cellular Component	GO:0044304	main axon		5.917E-9	6.532E-6	1.814E-7	1.376E-6	27	87	MAP1B,MBP,ADORA1,ADORA2A,ANK1,ANK2,ANK3,APP,SPTBN4,MYO1D,CD40,CDH1,CNGA3,DLG2,SCN8A,SLC1A2,SIRT2,SPOCK1,NFASC,MAPK8IP3,TIAM1,MGLL,CADM1,KCNH1,NAV1,KCNAB1,KCNQ3
GO: Cellular Component	GO:0034702	ion channel complex		6.959E-9	7.683E-6	2.077E-7	1.575E-6	61	313	CATSPERG,CACNA1I,CACNA1G,CACNA1A,CACNA1C,CACNA1D,CACNA1E,CACNA1S,CACNG1,CLIC6,SHISA9,HTR3B,PDE4D,CACNA2D2,BEST3,DLGAP3,CLCN2,AKAP6,CATSPERZ,CNIH3,DLG2,DLG3,MCUB,DPP6,EPS8,KCNIP3,KCNIP1,CACNG3,SCN4A,SCN5A,SCN8A,SHANK2,CACNG5,GABRB1,GABRE,ABCC8,GRID2,GRIK3,GRIK4,TTYH3,GRIN2C,CATSPERD,TRPC4,PORCN,SHANK3,KCNA5,KCNA7,KCNB1,KCND3,KCNG1,KCNH1,KCNH2,KCNJ6,KCNMA1,KCNN1,KCNN4,KCNQ1,KCNAB1,KCNQ3,TRPC7,TTYH2
GO: Cellular Component	GO:0042734	presynaptic membrane		7.886E-9	8.706E-6	2.291E-7	1.738E-6	47	214	ADORA1,ADORA2A,APBA1,ATP1A3,CADM3,CACNA1A,CACNA1C,CACNA1D,CACNA1E,SYT7,OPRD1,DGKI,PDE2A,CHRM3,NRXN3,NRXN2,OTOF,CLTA,CNTN1,GABBR2,ERC2,CTNNA2,SNPH,PTPRS,EFNB2,EPHA4,EPHB2,STX2,PI4K2A,SCN8A,GPC4,ADGRL1,SLC1A2,SLC6A1,SLC6A9,SLC6A11,GRIK3,GRIK4,ZDHHC17,GRM4,PIP5K1C,IGSF21,CADM1,HTR2A,KCNH1,KCNJ6,KCNMA1
GO: Cellular Component	GO:1990351	transporter complex		9.099E-9	1.005E-5	2.576E-7	1.954E-6	65	345	ABCA2,ATP1A1,ATP1A3,CATSPERG,CACNA1I,CACNA1G,CACNA1A,CACNA1C,CACNA1D,CACNA1E,CACNA1S,CACNG1,CLIC6,SHISA9,HTR3B,PDE4D,CACNA2D2,BEST3,DLGAP3,CLCN2,CNGA3,AKAP6,CATSPERZ,CNIH3,DLG2,DLG3,MCUB,DPP6,EPS8,KCNIP3,KCNIP1,CACNG3,SCN4A,SCN5A,SCN8A,SHANK2,CACNG5,GABRB1,GABRE,ABCC8,GRID2,GRIK3,GRIK4,TTYH3,GRIN2C,CATSPERD,TRPC4,PORCN,SHANK3,KCNA5,KCNA7,KCNB1,KCND3,KCNG1,KCNH1,KCNH2,KCNJ6,KCNMA1,KCNN1,KCNN4,KCNQ…
GO: Cellular Component	GO:0098805	whole membrane		1.206E-8	1.331E-5	3.327E-7	2.523E-6	227	1760	ABHD17A,ABCA2,ACACB,MAP6,TPCN1,FZD7,UNC5A,SCAMP5,SORCS2,OSBPL9,OSBPL11,ABCD1,ALDH3A2,VPS18,ANK2,OSTM1,SLC25A5,APP,AP3B1,ARCN1,SCARF1,SKAP1,ASS1,TMEM108,ATP1A1,RAP2C,MDGA1,MTX1,MARCO,ABCC3,MYO1D,SLC39A11,NAPA,NF2,SYNJ2,AP1S2,AP1M1,BSN,WASF1,LDLRAD4,NPHS1,CACNA1C,ATP8B3,SLC11A2,ATP6V0E1,NSF,CAMK2B,NTRK2,SYT2,SYT7,OPRD1,CD9,PRKN,CDH1,CDH13,PDE2A,ENPP1,PDZK1,PEX6,CLCN6,OTOF,SUN2,AHNAK,CLTA,PKP1,STOML…
GO: Cellular Component	GO:0099055	integral component of postsynaptic membrane		1.323E-8	1.460E-5	3.562E-7	2.702E-6	40	170	ADORA1,ADORA2A,LRFN2,ADGRB1,NRP2,CACNA1C,CACNA1E,OPRD1,SHISA9,CHRM3,LRFN4,GABBR2,PTPRO,PTPRS,PTPRZ1,EFNB2,EPHA4,EPHB2,CACNG3,SCN8A,CLSTN1,SLC6A1,SLC6A8,SLC6A9,SLC6A11,SLC8A2,SLC8A1,SLC8A3,SORCS3,CACNG5,CLSTN2,LRRC4,SLITRK2,GRID2,GRIK4,CADM1,FLRT3,HTR2A,KCND3,CHRNA10
GO: Cellular Component	GO:0099081	supramolecular polymer		3.249E-8	3.587E-5	8.540E-7	6.477E-6	200	1528	MAP1B,MAP6,ACTA1,ACTG1,TENM2,FZD9,ADORA2A,MTUS1,KIF6,VPS18,SHROOM3,ANK1,ANK2,ANK3,GAS7,APP,MYZAP,NCKAP5L,CDC14A,ARHGAP4,ARL3,MAPK15,SKAP1,CATSPERG,MYH3,MYH10,MYL4,MYLK,MYH13,MYO1D,KIF1A,MYO1E,MYO10,BBS1,MYO3A,NF2,SYNJ2,RASSF3,LMNTD1,CACNA1C,CACNA1D,CACNA1S,SLC11A2,NRAP,ROR1,NUMA1,CAPZB,TSPEAR,CASQ1,MAP7,ODF2,TTLL8,OXTR,INA,DNAAF1,CEP170B,DLGAP2,CFAP251,PDZK1,PARVB,TBCB,CFAP54,AHNAK,PKP1,LMOD1,JAK…
GO: Cellular Component	GO:0099080	supramolecular complex		3.593E-8	3.966E-5	9.224E-7	6.996E-6	200	1530	MAP1B,MAP6,ACTA1,ACTG1,TENM2,FZD9,ADORA2A,MTUS1,KIF6,VPS18,SHROOM3,ANK1,ANK2,ANK3,GAS7,APP,MYZAP,NCKAP5L,CDC14A,ARHGAP4,ARL3,MAPK15,SKAP1,CATSPERG,MYH3,MYH10,MYL4,MYLK,MYH13,MYO1D,KIF1A,MYO1E,MYO10,BBS1,MYO3A,NF2,SYNJ2,RASSF3,LMNTD1,CACNA1C,CACNA1D,CACNA1S,SLC11A2,NRAP,ROR1,NUMA1,CAPZB,TSPEAR,CASQ1,MAP7,ODF2,TTLL8,OXTR,INA,DNAAF1,CEP170B,DLGAP2,CFAP251,PDZK1,PARVB,TBCB,CFAP54,AHNAK,PKP1,LMOD1,JAK…
GO: Cellular Component	GO:0031256	leading edge membrane		4.672E-8	5.158E-5	1.172E-6	8.891E-6	42	191	ADORA1,ADORA2A,UNC5A,ANK1,EPB41L5,MYO1D,KSR1,NF2,SYNJ2,CACNA1D,OPRD1,SHISA9,CSPG4,PIEZO1,AIF1L,PTPRZ1,DPP4,MTSS2,EPS8,APC2,DLC1,SLC1A2,GABRE,CLASP2,MAPK8IP3,KANK1,SYNE2,WWC1,PIP5K1C,TIAM1,CORO1C,HPCA,SCIMP,USH2A,EZR,INSR,LAMP5,ITGA5,KCNB1,KCNH1,DOCK8,SPRY4
GO: Cellular Component	GO:0099512	supramolecular fiber		5.799E-8	6.402E-5	1.423E-6	1.079E-5	198	1521	MAP1B,MAP6,ACTA1,ACTG1,TENM2,FZD9,ADORA2A,MTUS1,KIF6,VPS18,SHROOM3,ANK1,ANK2,ANK3,GAS7,APP,MYZAP,NCKAP5L,CDC14A,ARHGAP4,ARL3,MAPK15,SKAP1,CATSPERG,MYH3,MYH10,MYL4,MYLK,MYH13,MYO1D,KIF1A,MYO1E,MYO10,BBS1,MYO3A,NF2,SYNJ2,RASSF3,LMNTD1,CACNA1C,CACNA1D,CACNA1S,SLC11A2,NRAP,ROR1,NUMA1,CAPZB,TSPEAR,CASQ1,MAP7,ODF2,TTLL8,OXTR,INA,DNAAF1,CEP170B,DLGAP2,CFAP251,PDZK1,PARVB,TBCB,CFAP54,AHNAK,PKP1,LMOD1,JAK…
GO: Cellular Component	GO:0015629	actin cytoskeleton		1.491E-7	1.646E-4	3.579E-6	2.714E-5	118	813	ACTA1,ACTG1,TENM2,FZD9,ARHGAP21,MOBP,VPS18,SHROOM3,GAS7,APP,MYZAP,CDC14A,SPTBN4,MYH3,MYH10,MYL4,MYLK,MYH13,MYO1D,MYO1E,MYO10,MYO3A,NF2,WASF1,SLC11A2,MYO1H,ROR1,CAPZB,TSPEAR,OXTR,CDH1,PDZK1,PARVB,AHNAK,LMOD1,CNN3,ONECUT2,SEPTIN5,PODXL,BCAR1,ADGRA2,SH3PXD2A,DEF6,AUTS2,PRKCB,CTNNA2,CROCC,MTSS1,DAB1,AIF1L,DCTN1,TIAM2,PTPRZ1,RALGDS,PDCD6IP,ARPC1B,ACE2,MYH14,FARP1,EPHA4,MTSS2,EPHB1,EPS8,APC2,LRRK2,OBSC…
GO: Cellular Component	GO:0043204	perikaryon		3.309E-7	3.653E-4	7.772E-6	5.894E-5	39	183	MAP1B,APP,CPNE5,ASS1,MYO1D,ZPR1,CACNA1A,CACNA1C,CACNA1E,CAMK2B,NTRK2,NEURL1,PENK,CLCN2,CNGA3,PTPRS,PDE11A,ENO2,EPHA4,LRRK2,PI4K2A,SEMA4F,SLC2A3,SLC8A2,SLC8A3,SIRT2,WDFY3,PDE10A,GHRH,GRIK3,GRIK4,HPCA,RBFOX3,RTN4RL1,KCNB1,KCNH1,KCNAB1,KIF5A,CHRNA10
GO: Cellular Component	GO:0045121	membrane raft		3.875E-7	4.278E-4	8.912E-6	6.759E-5	67	396	UNC5A,ANK2,SLC25A5,APP,SKAP1,ATP1A1,MDGA1,MYO1D,NF2,SYNJ2,NPHS1,CACNA1C,OPRD1,PRKN,CDH1,CDH13,PDE2A,PDZK1,AHNAK,STOML3,CNTN1,AKAP6,PODXL,PPT1,CSK,PRKAR1A,CTSD,DPP4,ACE2,ENO2,EPHB1,STX2,LRRK2,PI4K2A,EHD2,DLC1,FCER1G,SCN5A,FYN,UNC5B,GJA3,GNAI3,GNAS,GPM6B,GRIP1,TNR,HK1,CORO1C,PARK7,TRPC4,TSHR,UMOD,VDR,EZR,HTR2A,ASAH2,RTN4RL1,IGF1R,INSR,ITPR1,KCNA5,KCND3,MALL,KCNMA1,KCNN4,KCNQ1,KCNQ3
GO: Cellular Component	GO:0098889	intrinsic component of presynaptic membrane		4.016E-7	4.434E-4	9.048E-6	6.863E-5	31	130	ADORA1,ADORA2A,ATP1A3,CADM3,CACNA1A,CACNA1C,CACNA1D,CACNA1E,SYT7,OPRD1,CHRM3,CNTN1,GABBR2,PTPRS,EFNB2,EPHA4,EPHB2,SCN8A,GPC4,ADGRL1,SLC1A2,SLC6A1,SLC6A9,SLC6A11,GRIK4,GRM4,CADM1,HTR2A,KCNH1,KCNJ6,KCNMA1
GO: Cellular Component	GO:0098857	membrane microdomain		4.258E-7	4.701E-4	9.402E-6	7.131E-5	67	397	UNC5A,ANK2,SLC25A5,APP,SKAP1,ATP1A1,MDGA1,MYO1D,NF2,SYNJ2,NPHS1,CACNA1C,OPRD1,PRKN,CDH1,CDH13,PDE2A,PDZK1,AHNAK,STOML3,CNTN1,AKAP6,PODXL,PPT1,CSK,PRKAR1A,CTSD,DPP4,ACE2,ENO2,EPHB1,STX2,LRRK2,PI4K2A,EHD2,DLC1,FCER1G,SCN5A,FYN,UNC5B,GJA3,GNAI3,GNAS,GPM6B,GRIP1,TNR,HK1,CORO1C,PARK7,TRPC4,TSHR,UMOD,VDR,EZR,HTR2A,ASAH2,RTN4RL1,IGF1R,INSR,ITPR1,KCNA5,KCND3,MALL,KCNMA1,KCNN4,KCNQ1,KCNQ3
GO: Cellular Component	GO:0099056	integral component of presynaptic membrane		4.791E-7	5.290E-4	1.037E-5	7.866E-5	29	118	ADORA1,ADORA2A,ATP1A3,CADM3,CACNA1A,CACNA1C,CACNA1D,CACNA1E,SYT7,OPRD1,CHRM3,GABBR2,PTPRS,EFNB2,EPHA4,EPHB2,SCN8A,ADGRL1,SLC1A2,SLC6A1,SLC6A9,SLC6A11,GRIK4,GRM4,CADM1,HTR2A,KCNH1,KCNJ6,KCNMA1
GO: Cellular Component	GO:0005794	Golgi apparatus		7.756E-7	8.563E-4	1.647E-5	1.249E-4	205	1643	ABO,MAP6,HS6ST2,ZFYVE1,TRRAP,TENM2,FZD9,ADORA2A,MTUS1,SCAMP5,OSBPL9,OSBPL11,MMP14,ARHGAP21,SH3RF1,ANK3,APBA1,APP,AP3B1,ARCN1,ARHGAP4,C1GALT1C1,ARL3,MAPK15,PLPP3,TNKS,ATP1A1,ATP1A3,MUC1,MUC5AC,B4GALT4,SLC39A11,NAPA,BGN,ASAP2,NFE2L2,AP1S2,NHS,AP1M1,B4GALNT3,BSN,MYRF,NOTCH2,NOTCH4,ATP8B3,SLC11A2,NSF,NTRK2,NUMA1,CASQ1,CBFA2T3,FMNL3,PRKN,LRBA,MOSMO,CDH1,PAQR3,LARGE1,PDE2A,PDGFRB,ENPP2,CYTH2,B4GALT5,SG…
GO: Cellular Component	GO:0098839	postsynaptic density membrane		9.141E-7	1.009E-3	1.904E-5	1.444E-4	25	96	ABHD17A,LRFN2,OPRD1,SHISA9,DGKI,CHRM3,LRFN4,PTPRO,PTPRS,PTPRZ1,DLG2,DLG3,EFNB2,CACNG3,SCN8A,CNKSR2,CLSTN1,SORCS3,CACNG5,IQSEC2,CLSTN2,LRRC4,GRID2,GRIN2C,TIAM1
GO: Cellular Component	GO:0019898	extrinsic component of membrane		9.734E-7	1.075E-3	1.990E-5	1.509E-4	58	334	ZFYVE1,TENM2,PIK3R3,PLEKHA4,MYZAP,SYNJ2,BSN,NMT1,NUMA1,DGKI,CDH1,CDH11,CDH13,CDK16,CYTH2,PIK3C2B,PIK3C2G,JAKMIP1,CNTFR,HID1,RGS6,CTNNA2,MAGI2,PCSK9,VPS13D,FARP1,APC2,KCNIP1,EHD2,SGTA,CNKSR2,RPH3A,SCUBE1,WDFY3,FYN,SOX10,MMP27,SRMS,GFRA1,SYN2,GNAI3,GNAL,GNAS,GNAT1,GNAZ,GNG7,CARMIL2,CDH22,TIAM1,MGLL,HPCA,UMOD,EZR,SHANK3,MICALL1,RNF112,KCNAB1,SMAD7
GO: Cellular Component	GO:0098589	membrane region		1.516E-6	1.673E-3	3.042E-5	2.307E-4	67	411	UNC5A,ANK2,SLC25A5,APP,SKAP1,ATP1A1,MDGA1,MYO1D,NF2,SYNJ2,NPHS1,CACNA1C,OPRD1,PRKN,CDH1,CDH13,PDE2A,PDZK1,AHNAK,STOML3,CNTN1,AKAP6,PODXL,PPT1,CSK,PRKAR1A,CTSD,DPP4,ACE2,ENO2,EPHB1,STX2,LRRK2,PI4K2A,EHD2,DLC1,FCER1G,SCN5A,FYN,UNC5B,GJA3,GNAI3,GNAS,GPM6B,GRIP1,TNR,HK1,CORO1C,PARK7,TRPC4,TSHR,UMOD,VDR,EZR,HTR2A,ASAH2,RTN4RL1,IGF1R,INSR,ITPR1,KCNA5,KCND3,MALL,KCNMA1,KCNN4,KCNQ1,KCNQ3
GO: Cellular Component	GO:0098797	plasma membrane protein complex		1.798E-6	1.985E-3	3.546E-5	2.689E-4	102	711	ABCA2,ACVR1,ACVRL1,SKAP1,ATP1A1,ATP1A3,CATSPERG,BMPR1B,CACNA1I,CACNA1G,CACNA1A,CACNA1C,CACNA1D,CACNA1E,CACNA1S,CACNG1,SHISA9,CD40,SNTG2,HTR3B,CDH1,CDH11,CDH13,PDE4D,CACNA2D2,DLGAP3,CLTA,CNTFR,HJV,CATSPERZ,COL13A1,DUOX2,GABBR2,ADGRA2,CNIH3,DLG2,DLG3,DPP6,TNK2,EPS8,APC2,LRRK2,KCNIP3,KCNIP1,CACNG3,FCER1G,SCN4A,SCN5A,SCN8A,NOX1,SHANK2,CACNG5,GJB6,GFRA1,GJA3,ABCC8,SYK,GNAI3,GNAL,GNAS,GNAT1,GNAZ,GNG7,G…
GO: Cellular Component	GO:0031253	cell projection membrane		1.914E-6	2.113E-3	3.708E-5	2.812E-4	62	373	ADORA1,FZD9,ADORA2A,UNC5A,ANK1,EPB41L5,MYO1D,MYO10,BBS1,KSR1,NF2,SYNJ2,CACNA1D,SLC11A2,TSPEAR,OPRD1,SHISA9,MOSMO,PDZK1,GPR37L1,PODXL,MXRA8,CSPG4,PRKCB,PIEZO1,AIF1L,PTPRZ1,DPP4,ACE2,MTSS2,EPS8,APC2,DLC1,LIMA1,SLC1A2,NOX1,SHANK2,GABRE,CLASP2,MAPK8IP3,KANK1,SYNE2,GNAT1,WWC1,PIP5K1C,TIAM1,CORO1C,HPCA,UMOD,SCIMP,USH2A,UTRN,EZR,SHANK3,INSR,LAMP5,ITGA5,KCNB1,KCNH1,AMN,DOCK8,SPRY4
GO: Cellular Component	GO:0048471	perinuclear region of cytoplasm		2.837E-6	3.132E-3	5.401E-5	4.096E-4	114	825	MAP1B,MAP6,ZFYVE1,MEIS2,MAP3K4,FZD9,OSBPL6,ABCD1,MOBP,SH3RF1,ANK2,APBA1,APOD,APP,ADGRB1,NF2,SYNJ2,ZPR1,CACNA1G,SLC11A2,NTRK2,BRSK2,MAP7,NEURL1,DGKI,PRKN,CDC25C,CDH1,CDH13,PDE2A,CCDC78,ATXN10,AKAP6,SELENOM,PTGES,SLC30A7,AATK,DEF6,DNM3,PRKCE,RAPGEF2,CX3CR1,DAB1,CTIF,MAGI2,RASIP1,PTPRM,PTPRR,PCSK9,ATP9A,ECE1,LRPPRC,TNK2,PATJ,APC2,EHD2,TMEM184A,ATXN2,SCN5A,FGFR1,FGFR3,CASC3,ATG7,ARFGEF2,SIPA1,CYFIP2,…
GO: Cellular Component	GO:0099513	polymeric cytoskeletal fiber		4.206E-6	4.644E-3	7.871E-5	5.969E-4	166	1312	MAP1B,MAP6,ACTA1,ACTG1,TENM2,FZD9,ADORA2A,MTUS1,KIF6,VPS18,SHROOM3,GAS7,APP,NCKAP5L,CDC14A,ARHGAP4,ARL3,MAPK15,SKAP1,CATSPERG,MYH10,MYLK,MYO1D,KIF1A,MYO1E,MYO10,BBS1,MYO3A,NF2,SYNJ2,RASSF3,LMNTD1,SLC11A2,ROR1,NUMA1,CAPZB,TSPEAR,MAP7,ODF2,TTLL8,OXTR,INA,DNAAF1,CEP170B,DLGAP2,CFAP251,PDZK1,TBCB,CFAP54,PKP1,LMOD1,JAKMIP1,CATSPERZ,SEPTIN5,PODXL,HID1,ADGRA2,DEF6,DNM3,PRKAR1A,PRKCB,CFAP61,IFT140,SNPH,T…
GO: Cellular Component	GO:0043679	axon terminus		5.272E-6	5.820E-3	9.701E-5	7.357E-4	42	226	ACTG1,ADORA1,GIT1,ATP1A3,SYNJ2,BSN,NTRK2,ROR1,CAPZB,SYT7,OPRD1,DGKI,PRKN,CDH1,PENK,CHRM3,SEPTIN5,ERC2,PRKCB,CTNNA2,GIT2,PTPRN2,ELK1,EPHA4,LRRK2,KCNIP3,ITSN1,SLC6A9,SHANK2,NMU,GHRH,GOT1,RAPGEF4,GRIK3,GRIK4,GRM4,TNR,FLRT3,USH2A,TANC1,ANKS1B,KCNMA1
GO: Cellular Component	GO:0030027	lamellipodium		5.622E-6	6.207E-3	1.017E-4	7.717E-4	39	204	ACTA1,SH3RF1,APBB2,APP,MYH10,MYLK,MYO10,NF2,NHS,WASF1,CAPZB,CDH1,PARVB,SSH1,PLCG1,PODXL,BCAR1,CSPG4,CTNNA2,PIEZO1,TIAM2,PTPRM,PTPRO,PTPRZ1,DPP4,MTSS2,STX2,APC2,ITSN1,PPP1R9A,ABLIM3,RAB3IP,FGD4,SYNE2,CARMIL2,SRCIN1,CORO1C,DOCK8,ABLIM1
GO: Cellular Component	GO:0042383	sarcolemma		5.937E-6	6.555E-3	1.057E-4	8.019E-4	35	175	ANK1,ANK2,ANK3,ATP1A1,ATP1A3,BGN,CACNA1C,CACNA1D,CACNA1S,CACNG1,CASQ1,SNTG2,AHNAK,CCDC78,PLCB3,AKAP6,PRKCE,OBSCN,SCN5A,CIB2,SLC2A5,SLC8A1,SLC8A3,ABCC8,POPDC3,GNAS,CORO1C,UTRN,VDR,EZR,IGF1R,KCNB1,KCND3,KCNQ1,SSPN
GO: Cellular Component	GO:0044306	neuron projection terminus		9.852E-6	1.088E-2	1.726E-4	1.309E-3	44	247	ACTG1,ADORA1,GIT1,ATP1A3,SYNJ2,BSN,NTRK2,ROR1,CAPZB,SYT7,OPRD1,DGKI,PRKN,CDH1,PENK,CHRM3,SEPTIN5,ERC2,PRKCB,CTNNA2,GIT2,PTPRN2,ELK1,EPHA4,LRRK2,KCNIP3,BAIAP2,ITSN1,SLC6A9,SHANK2,NMU,GHRH,GOT1,RAPGEF4,GRIK3,GRIK4,GRM4,TNR,FLRT3,USH2A,TANC1,ANKS1B,KCNMA1,VTI1A
GO: Cellular Component	GO:0005938	cell cortex		1.077E-5	1.189E-2	1.857E-4	1.409E-3	58	360	MICAL3,MOBP,SHROOM3,ANK1,PPFIA3,MYZAP,SPTBN4,MYH10,MYO1D,MYO1E,MYO10,NF2,BSN,NUMA1,CAPZB,CDH1,CLTA,SEPTIN5,ERC2,CTBP2,RAI14,CTNNA2,DCTN1,MELK,ENO2,MTSS2,EPS8,DLC1,FGF1,FGFR2,CAP2,CIB2,PPP1R9A,TRAK1,EXOC2,SPIRE2,SEPTIN9,SPTB,IQSEC2,PARD6G,CLASP2,DENND2B,PARD6B,PDLIM2,FRYL,AKAP13,RIMBP2,TNFAIP2,TPM3,CORO1C,TRPC4,UTRN,EZR,SEPTIN10,ITGB4,ITPR2,WIPF2,LLGL1
GO: Cellular Component	GO:0048786	presynaptic active zone		1.120E-5	1.236E-2	1.902E-4	1.443E-3	23	96	ADORA1,ADORA2A,PPFIA4,APBA1,PPFIA3,APP,BSN,CACNA1A,CACNA1D,NTRK2,DGKI,OTOF,ERC2,CTBP2,CTNNA2,STX2,NUFIP1,SCN8A,SHANK2,IQSEC2,GRM4,RIMBP2,KCNMA1
GO: Cellular Component	GO:0005891	voltage-gated calcium channel complex		1.466E-5	1.618E-2	2.452E-4	1.859E-3	14	43	CATSPERG,CACNA1I,CACNA1G,CACNA1A,CACNA1C,CACNA1D,CACNA1E,CACNA1S,CACNG1,PDE4D,CACNA2D2,CATSPERZ,CACNG3,CATSPERD
GO: Cellular Component	GO:0045177	apical part of cell		1.519E-5	1.677E-2	2.503E-4	1.899E-3	70	465	ACVR1,SHROOM3,ANK2,APP,ATP1A1,MUC1,NF2,AJM1,NHS,CACNA1D,SLC11A2,NUMA1,OXTR,CD9,SLC28A1,CD81,CDH1,OTOG,PDE4D,PDGFRB,PDZK1,OTOF,DSTYK,CNTFR,PODXL,DUOX2,CSPG4,RAPGEF2,DAB1,MFRP,PTPRO,DPP4,FAT4,DSG2,EDA,ATP6AP2,PATJ,NOD1,SLC39A4,SLC2A5,SHANK2,CNKSR3,PDZD2,TJP3,GJB6,STK26,CDH23,PARD6G,PARD6B,AJAP1,MTCL1,GNAS,GNAT1,RAPGEF4,SLCO2B1,TUBG1,UMOD,USH2A,EZR,SLC2A9,CRB2,ITPK1,ITPR3,KCNA5,KCNMA1,KCNN4,AMN,LMO7…
GO: Cellular Component	GO:0005884	actin filament		1.566E-5	1.729E-2	2.542E-4	1.928E-3	76	517	ACTA1,ACTG1,TENM2,FZD9,VPS18,GAS7,APP,CDC14A,MYH10,MYLK,MYO1D,MYO1E,MYO10,MYO3A,NF2,SLC11A2,ROR1,CAPZB,TSPEAR,OXTR,PDZK1,LMOD1,SEPTIN5,PODXL,ADGRA2,DEF6,PRKCB,DAB1,AIF1L,TIAM2,PTPRZ1,RALGDS,ACE2,MYH14,FARP1,EPHA4,EPHB1,EPS8,APC2,LRRK2,PDZD7,DLC1,FMN1,FGF13,BAIAP2,LIMA1,CIB2,PPP1R9A,ABLIM3,SHANK2,LIMCH1,FYN,WWOX,SEPTIN9,CDH23,NFASC,FGD4,SYNE2,MYO18B,PDLIM2,RAPGEF4,SRCIN1,TIAM1,AKAP13,TPM3,USH2A,UT…
GO: Cellular Component	GO:0060076	excitatory synapse		1.729E-5	1.909E-2	2.767E-4	2.099E-3	20	79	CADM3,BSN,NTRK2,IGSF11,DGKI,CTNNA2,CACNG3,SCN8A,FGFR2,BAIAP2,SLC6A9,LRRC4,RAPGEF4,GRID2,GRM4,SHANK3,ELFN1,KCNH1,KCNJ6,SLC17A6
GO: Cellular Component	GO:0031012	extracellular matrix		1.830E-5	2.021E-2	2.887E-4	2.190E-3	85	598	MATN3,ADAM11,ELFN2,AEBP1,MMP14,MMP15,ANXA11,MUC1,MUC5AC,LRRC15,BGN,BMP7,VWA2,COL6A6,CD151,CDH13,OTOG,CHAD,COL4A1,COL8A1,COL8A2,COL9A1,COL9A3,COL11A1,COL13A1,COL15A1,COL16A1,ADAMTS3,ADAMTS2,MMP28,CSPG4,CTSD,HTRA1,SSC5D,PTPRZ1,IMPG2,CRISPLD2,INHBE,GPC6,MEGF6,CELA1,LGR6,LINGO3,FBLN1,FBLN2,FBN2,GPC4,FGF1,ADAMTS20,GPC5,FGFR2,SEMA3C,FRAS1,SFRP1,SOD3,SPARC,MMP27,COL25A1,SMOC2,GPC3,GLG1,GPLD1,FREM3,THBS2…
GO: Cellular Component	GO:0099634	postsynaptic specialization membrane		2.821E-5	3.115E-2	4.387E-4	3.327E-3	28	136	ABHD17A,LRFN2,OPRD1,SHISA9,DGKI,CYTH2,CHRM3,LRFN4,PTPRO,PTPRS,PTPRZ1,DLG2,DLG3,EFNB2,CACNG3,SCN8A,CNKSR2,CLSTN1,SORCS3,CACNG5,IQSEC2,CLSTN2,LRRC4,GRID2,GRIN2C,TIAM1,KCND3,CHRNA10
GO: Cellular Component	GO:0032838	plasma membrane bounded cell projection cytoplasm		2.882E-5	3.181E-2	4.408E-4	3.343E-3	55	347	MAP6,ADA,AP3B1,CDC14A,MADD,ARL3,MAPK15,TMEM108,CATSPERG,KIF1A,BBS1,BSN,WASF1,ODF2,TTLL8,DNAAF1,CFAP251,CFAP54,CATSPERZ,PRKAR1A,CFAP61,IFT140,TRAF3IP1,IFT172,PURA,DLG2,DNAH6,DNAH8,DNAH9,CFAP69,LRRK2,BAIAP2,ATG7,ARFGEF2,TRAK1,DNAI1,SEPTIN9,LCA5L,CDH23,MAPK8IP3,GLI2,TCP11,GRIK3,TIAM1,DNAI2,HK1,CATSPERD,CCDC114,HPCA,CFAP74,KCNAB1,KIF5A,KIF5C,MAP1LC3B,PACRG
GO: Cellular Component	GO:0098890	extrinsic component of postsynaptic membrane		2.915E-5	3.218E-2	4.408E-4	3.343E-3	8	16	TENM2,DGKI,CYTH2,CTNNA2,MAGI2,FARP1,CNKSR2,TIAM1
GO: Cellular Component	GO:0098878	neurotransmitter receptor complex		2.996E-5	3.307E-2	4.469E-4	3.390E-3	16	57	SHISA9,HTR3B,DLGAP3,CNIH3,DLG2,DLG3,EPS8,CACNG3,SHANK2,CACNG5,GRID2,GRIK3,GRIK4,GRIN2C,PORCN,SHANK3
GO: Cellular Component	GO:0016323	basolateral plasma membrane		3.305E-5	3.648E-2	4.864E-4	3.689E-3	44	259	ADORA1,ANK1,ANK2,ANK3,ATP1A1,SLC4A4,ABCC3,MYO1D,MAP7,SLC7A7,CD81,CDH1,ENPP1,CHRM3,OTOF,DSTYK,HJV,CTNNA2,DLG2,DLG3,STX2,ABCC4,NOD1,SLC1A3,SLC8A2,SLC8A1,MEGF11,AJAP1,RAPGEF4,SLCO2B1,TRPC4,TSHR,CADM1,UMOD,EZR,SLC2A9,NKD2,ITGA9,ITGB4,KCNN4,KCNQ1,RHBG,LLGL1,LRP1
GO: Cellular Component	GO:0005874	microtubule		3.638E-5	4.017E-2	5.285E-4	4.008E-3	88	636	MAP1B,MAP6,MTUS1,KIF6,SHROOM3,NCKAP5L,CDC14A,ARHGAP4,ARL3,MAPK15,SKAP1,CATSPERG,KIF1A,BBS1,SYNJ2,RASSF3,NUMA1,MAP7,ODF2,TTLL8,DNAAF1,CEP170B,CFAP251,TBCB,CFAP54,JAKMIP1,CATSPERZ,HID1,DNM3,PRKAR1A,CFAP61,IFT140,SNPH,TRAF3IP1,IFT172,DCTN1,HAUS4,KLHL21,DNAH6,DNAH8,DNAH9,KIF26B,LRPPRC,DYNC1LI1,CFAP69,APC2,FGF13,BAIAP2,ATG7,KIF21A,ARFGEF2,DNAI1,RGS14,SLC8A2,SLC8A1,SLC8A3,SIRT2,TTLL11,CDK5RAP2,KIF21B,D…
GO: Cellular Component	GO:0000139	Golgi membrane		5.398E-5	5.959E-2	7.739E-4	5.870E-3	102	770	ABO,HS6ST2,ADORA2A,SCAMP5,ARHGAP21,APP,ARCN1,C1GALT1C1,ARL3,MAPK15,TNKS,B4GALT4,NAPA,ASAP2,AP1S2,AP1M1,B4GALNT3,NOTCH2,NOTCH4,NSF,NTRK2,NUMA1,CBFA2T3,PRKN,PAQR3,LARGE1,CYTH2,B4GALT5,SGMS1,HS6ST1,CLTA,ST8SIA5,GAL3ST1,CHST11,HID1,HS2ST1,GALNT9,PRKCE,USP6NL,CUX1,CHST9,COG3,GALNT18,CNIH3,SEC24D,ARFGAP3,TMEM132A,HS3ST3B1,HS3ST3A1,CHPF,DOP1B,COG7,TVP23B,ZDHHC9,LGR6,KIAA0319L,EXT1,RTN1,MBTPS2,COG5,ARFGE…
GO: Cellular Component	GO:0098982	GABA-ergic synapse		6.065E-5	6.696E-2	8.584E-4	6.511E-3	23	106	GIT1,MDGA1,BSN,CACNA1E,SYT7,CDH13,LRFN4,NRXN3,NRG2,GABBR2,ERC2,CTBP2,MAGI2,PTPRO,IQSEC3,CLSTN1,SLC6A1,SLC6A11,GABRB1,SLITRK2,SLC6A17,ITPR1,KCND3
GO: Cellular Component	GO:0098791	Golgi apparatus subcompartment		6.439E-5	7.109E-2	8.998E-4	6.825E-3	59	391	ABO,ZFYVE1,SCAMP5,APP,AP3B1,B4GALT4,ASAP2,AP1S2,AP1M1,B4GALNT3,BSN,SLC11A2,NSF,LRBA,CDH1,B4GALT5,SGMS1,CLTA,HID1,RBFOX1,USP6NL,COG3,RASIP1,ARFGAP3,CHPF,DOP1B,COG7,ATP9A,LGR6,KIAA0319L,LRRK2,PI4K2A,ATP8A1,ATXN2,COG5,SLC66A2,ARFGEF2,ST6GAL1,ST3GAL3,ARFGAP2,FUT2,SORL1,NMNAT2,CLASP2,ARFIP1,XYLT1,SULF2,GLG1,DPY30,DENND5A,GNAS,CIT,AP4E1,MGAT4B,ICA1,MICALL1,YIPF6,VTI1A,LLGL1
GO: Cellular Component	GO:0043194	axon initial segment		6.618E-5	7.306E-2	9.133E-4	6.926E-3	9	22	ANK1,ANK2,ANK3,SPTBN4,CNGA3,SCN8A,NFASC,NAV1,KCNQ3
GO: Cellular Component	GO:0099092	postsynaptic density, intracellular component		6.886E-5	7.602E-2	9.385E-4	7.118E-3	11	32	DLGAP1,CTNNA2,TANC2,DLG3,BAIAP2,SH3GL3,FYN,IQSEC2,SHANK3,TANC1,ANKS1B
GO: Cellular Component	GO:0034704	calcium channel complex		7.037E-5	7.769E-2	9.474E-4	7.186E-3	17	67	CATSPERG,CACNA1I,CACNA1G,CACNA1A,CACNA1C,CACNA1D,CACNA1E,CACNA1S,CACNG1,PDE4D,CACNA2D2,AKAP6,CATSPERZ,MCUB,CACNG3,CATSPERD,TRPC4
GO: Cellular Component	GO:0008328	ionotropic glutamate receptor complex		7.603E-5	8.394E-2	1.011E-3	7.670E-3	15	55	SHISA9,DLGAP3,CNIH3,DLG2,DLG3,EPS8,CACNG3,SHANK2,CACNG5,GRID2,GRIK3,GRIK4,GRIN2C,PORCN,SHANK3
GO: Cellular Component	GO:0030175	filopodium		8.173E-5	9.023E-2	1.074E-3	8.147E-3	24	115	ACTA1,TENM2,FZD9,APP,MYO10,MYO3A,NF2,PODXL,ADGRA2,DEF6,TIAM2,PTPRZ1,FARP1,EPHA4,EPHB1,FGF13,BAIAP2,PPP1R9A,FGD4,SYNE2,SRCIN1,UTRN,EZR,KCNN3
GO: Cellular Component	GO:0030055	cell-substrate junction		8.717E-5	9.623E-2	1.132E-3	8.586E-3	62	421	MCAM,ACTG1,MMP14,GIT1,EPB41L5,ADGRB1,NHS,WASF1,NPHS1,NRAP,LIMD1,CD9,CD81,CD151,CDH13,PDGFRB,PARVB,ARHGAP22,AHNAK,CNN3,BCAR1,CSPG4,ARHGAP24,AIF1L,GIT2,PTK7,NECTIN2,DPP4,PDCD6IP,ARPC1B,EFNB2,RPL8,RPL22,RSU1,DLC1,FGFR3,RRAS2,LIMA1,CIB2,ASAP3,NFASC,CLASP2,TSPAN9,SYNE2,MAPRE2,GRB7,SRCIN1,PIP5K1C,TNS1,CORO1C,FLRT3,TNS3,EZR,YWHAG,ZNF185,ITGA5,ITGB4,LMLN,LMO7,SPRY4,LPP,LRP1
GO: Cellular Component	GO:0015630	microtubule cytoskeleton		9.095E-5	1.004E-1	1.168E-3	8.855E-3	164	1368	ABCA2,MAP1B,MAP6,SMC1A,AXIN2,MTUS1,AKT1,MICAL3,FAM110B,KIF6,SHROOM3,SLC25A5,ANXA11,APP,NCKAP5L,CDC14A,ARHGAP4,ARL3,MAPK15,CCDC124,SKAP1,TNKS,CATSPERG,MYH10,KIF1A,LRRC45,ADGRB2,BBS1,SYNJ2,NFE2L2,CEP95,RASSF3,HERC2,PLEKHA7,CAMK2B,NUMA1,BRSK2,MAP7,ODF2,TTLL8,DNAAF1,CEP170B,CDK16,CFAP251,PDE4D,TRIP4,RPRD1B,TBCB,KPNA7,CFAP54,CLTA,CCDC78,JAKMIP1,CATSPERZ,CCHCR1,SEPTIN5,PODXL,HID1,MAD2L1BP,ITSN2,PDE4DIP…
GO: Cellular Component	GO:0001726	ruffle		9.766E-5	1.078E-1	1.239E-3	9.399E-3	34	191	EPB41L5,GAS7,SKAP1,MYO10,KSR1,NF2,SYNJ2,CYTH2,PLCG1,PODXL,BCAR1,MTSS1,AIF1L,PTPRZ1,MTSS2,EPS8,DLC1,BAIAP2,LIMA1,ASAP3,CLASP2,FRMD4B,KANK1,FGD4,GNAS,WWC1,CARMIL2,PIP5K1C,CIT,TIAM1,CORO1C,EZR,ITGA5,SPRY4
GO: Cellular Component	GO:0031984	organelle subcompartment		1.045E-4	1.154E-1	1.311E-3	9.945E-3	61	415	ABO,ZFYVE1,SCAMP5,APP,AP3B1,B4GALT4,ASAP2,AP1S2,AP1M1,B4GALNT3,BSN,SLC11A2,NSF,CASQ1,LRBA,CDH1,B4GALT5,SGMS1,CLTA,HID1,RBFOX1,USP6NL,COG3,RASIP1,ARFGAP3,CHPF,DOP1B,COG7,ATP9A,LGR6,KIAA0319L,LRRK2,PI4K2A,ATP8A1,ATXN2,COG5,SLC66A2,ARFGEF2,ST6GAL1,ST3GAL3,ARFGAP2,FUT2,SORL1,NMNAT2,CLASP2,ARFIP1,XYLT1,SULF2,GLG1,DPY30,DENND5A,GNAS,CIT,AP4E1,MGAT4B,ICA1,MICALL1,REEP1,YIPF6,VTI1A,LLGL1
GO: Cellular Component	GO:0016324	apical plasma membrane		1.119E-4	1.236E-1	1.389E-3	1.053E-2	56	373	SHROOM3,ANK2,ATP1A1,MUC1,AJM1,NHS,CACNA1D,SLC11A2,OXTR,CD9,SLC28A1,CD81,OTOG,PDE4D,PDGFRB,PDZK1,DSTYK,CNTFR,PODXL,DUOX2,CSPG4,RAPGEF2,MFRP,PTPRO,DPP4,DSG2,ATP6AP2,PATJ,NOD1,SLC39A4,SLC2A5,SHANK2,CNKSR3,TJP3,GJB6,STK26,PARD6G,PARD6B,AJAP1,MTCL1,GNAS,GNAT1,RAPGEF4,SLCO2B1,UMOD,USH2A,EZR,SLC2A9,CRB2,ITPK1,KCNA5,KCNMA1,KCNN4,AMN,LMO7,SLC14A2
GO: Cellular Component	GO:0030863	cortical cytoskeleton		1.324E-4	1.461E-1	1.624E-3	1.232E-2	26	133	MOBP,SHROOM3,ANK1,MYZAP,SPTBN4,MYO1E,NF2,BSN,NUMA1,CAPZB,CDH1,MTSS2,DLC1,CAP2,CIB2,PPP1R9A,SPTB,CLASP2,PDLIM2,AKAP13,TPM3,TRPC4,UTRN,EZR,WIPF2,LLGL1
GO: Cellular Component	GO:0043296	apical junction complex		1.346E-4	1.486E-1	1.631E-3	1.237E-2	28	148	SHROOM3,ANK3,MAPK15,RAP2C,NHS,PLEKHA7,CLDN24,CDH1,MAGI1,CYTH2,TJP2,MXRA8,RAPGEF2,JAML,MAGI2,NECTIN2,DLG3,PDCD6IP,PATJ,FRMD4A,TJP3,PARD6G,NFASC,FRMD4B,PARD6B,STRN,CLDN14,KIFC3
GO: Cellular Component	GO:0008021	synaptic vesicle		1.359E-4	1.500E-1	1.631E-3	1.237E-2	40	242	SCAMP5,APBA1,APBA2,APP,MADD,KIF1A,BSN,SYT2,SYT7,OPRD1,DGKI,PRKN,CDK16,PENK,OTOF,CLTA,SEPTIN5,PPT1,PTPRN2,PTPRS,STX2,LRRK2,PI4K2A,ATP8A1,SVOP,SGTA,RPH3A,SLC6A9,SV2C,DISC1,ABCC8,SYN2,CADM1,ICA1,SLC6A17,RNF112,LAMP5,TMEM163,SLC17A6,VTI1A
GO: Cellular Component	GO:0005925	focal adhesion		1.435E-4	1.585E-1	1.704E-3	1.292E-2	60	411	MCAM,ACTG1,MMP14,GIT1,EPB41L5,ADGRB1,NHS,WASF1,NPHS1,LIMD1,CD9,CD81,CD151,CDH13,PDGFRB,PARVB,ARHGAP22,AHNAK,CNN3,BCAR1,CSPG4,ARHGAP24,AIF1L,GIT2,PTK7,NECTIN2,DPP4,PDCD6IP,ARPC1B,EFNB2,RPL8,RPL22,RSU1,DLC1,FGFR3,RRAS2,LIMA1,ASAP3,NFASC,CLASP2,TSPAN9,SYNE2,MAPRE2,GRB7,SRCIN1,PIP5K1C,TNS1,CORO1C,FLRT3,TNS3,EZR,YWHAG,ZNF185,ITGA5,ITGB4,LMLN,LMO7,SPRY4,LPP,LRP1
GO: Cellular Component	GO:0098858	actin-based cell projection		1.505E-4	1.662E-1	1.768E-3	1.341E-2	54	360	ACTA1,TENM2,FZD9,APP,CDC14A,MYH10,MYO1D,MYO1E,MYO10,MYO3A,NF2,SLC11A2,CAPZB,TSPEAR,OXTR,PDZK1,PODXL,ADGRA2,DEF6,PRKCB,DAB1,TIAM2,PTPRZ1,RALGDS,ACE2,MYH14,FARP1,EPHA4,EPHB1,EPS8,LRRK2,PDZD7,FGF13,BAIAP2,LIMA1,CIB2,PPP1R9A,SHANK2,WWOX,CDH23,NFASC,FGD4,SYNE2,RAPGEF4,SRCIN1,TIAM1,USH2A,UTRN,EZR,CORO2A,ITPR3,KCNN3,AMN,LIPC
GO: Cellular Component	GO:0032589	neuron projection membrane		1.527E-4	1.686E-1	1.774E-3	1.346E-2	17	71	ADORA1,ADORA2A,UNC5A,ANK1,MYO1D,CACNA1D,OPRD1,SHISA9,SLC1A2,GABRE,MAPK8IP3,HPCA,USH2A,INSR,LAMP5,KCNB1,KCNH1
GO: Cellular Component	GO:0099146	intrinsic component of postsynaptic density membrane		1.636E-4	1.806E-1	1.881E-3	1.427E-2	18	78	ABHD17A,LRFN2,OPRD1,SHISA9,CHRM3,LRFN4,PTPRO,PTPRS,PTPRZ1,DLG2,EFNB2,CACNG3,SCN8A,CLSTN1,SORCS3,CLSTN2,LRRC4,GRID2
GO: Cellular Component	GO:0034705	potassium channel complex		1.748E-4	1.929E-1	1.989E-3	1.509E-2	21	99	DLG2,DPP6,KCNIP3,KCNIP1,ABCC8,GRIK3,GRIK4,KCNA5,KCNA7,KCNB1,KCND3,KCNG1,KCNH1,KCNH2,KCNJ6,KCNMA1,KCNN1,KCNN4,KCNQ1,KCNAB1,KCNQ3
GO: Cellular Component	GO:0099501	exocytic vesicle membrane		1.793E-4	1.979E-1	1.999E-3	1.516E-2	25	128	SCAMP5,BSN,SYT2,SYT7,OPRD1,PRKN,OTOF,CLTA,PTPRN2,PTPRS,LRRK2,PI4K2A,ATP8A1,SVOP,SGTA,RPH3A,SLC6A9,SV2C,ABCC8,SYN2,ICA1,SLC6A17,LAMP5,TMEM163,SLC17A6
GO: Cellular Component	GO:0030672	synaptic vesicle membrane		1.793E-4	1.979E-1	1.999E-3	1.516E-2	25	128	SCAMP5,BSN,SYT2,SYT7,OPRD1,PRKN,OTOF,CLTA,PTPRN2,PTPRS,LRRK2,PI4K2A,ATP8A1,SVOP,SGTA,RPH3A,SLC6A9,SV2C,ABCC8,SYN2,ICA1,SLC6A17,LAMP5,TMEM163,SLC17A6
GO: Cellular Component	GO:0098685	Schaffer collateral - CA1 synapse		1.941E-4	2.143E-1	2.143E-3	1.626E-2	23	114	ACTG1,LRFN2,APBA1,APBA2,BSN,CAPZB,INA,DGKI,CDH11,PLCG1,PTPRS,EFNB2,EPHA4,CACNG3,BAIAP2,FYN,IQSEC2,LRRC4,SYN2,TNR,CADM1,ANKS1B,ITPR1
GO: Cellular Component	GO:0044291	cell-cell contact zone		2.353E-4	2.597E-1	2.571E-3	1.950E-2	19	87	ANK2,ANK3,SPTBN4,ATP1A1,RAP2C,NRAP,CAPZB,PCDH9,AHNAK,AKAP6,NECTIN2,DSG2,OBSCN,SCN5A,FGF13,SLC8A1,AJAP1,TIAM1,KCNA5
GO: Cellular Component	GO:0016459	myosin complex		2.930E-4	3.234E-1	3.171E-3	2.405E-2	16	68	MYH3,MYH10,MYL4,MYH13,MYO1D,MYO1E,MYO10,MYO3A,MYO1H,MYH14,OBSCN,LIMCH1,MYO16,MYO5C,MYO18B,TTN
GO: Cellular Component	GO:0070382	exocytic vesicle		3.162E-4	3.491E-1	3.390E-3	2.571E-2	41	260	SCAMP5,APBA1,APBA2,APP,MADD,KIF1A,BSN,SYT2,SYT7,OPRD1,DGKI,PRKN,CDK16,PENK,OTOF,CLTA,SEPTIN5,PPT1,PTPRN2,PTPRS,STX2,LRRK2,PI4K2A,ATP8A1,SVOP,SGTA,RPH3A,SLC6A9,SV2C,DISC1,ABCC8,SYN2,CADM1,ICA1,NKD2,SLC6A17,RNF112,LAMP5,TMEM163,SLC17A6,VTI1A
GO: Cellular Component	GO:0009986	cell surface		3.340E-4	3.687E-1	3.545E-3	2.689E-2	126	1036	MBP,MCAM,ACVRL1,ADA,DSCAML1,MAP3K5,FZD9,HEG1,LRFN2,ANK3,PPFIA4,APP,MSLNL,MUC1,LRRC15,TNFRSF11A,TNFRSF10B,BGN,BSN,NOTCH2,NOTCH4,CACNA1C,CACNA1D,SLC11A2,NTRK2,ROR1,TSPEAR,CD9,CD40,CD151,HTR3B,CDH1,CDH11,CDH13,CRLF1,PDGFRB,ENPP1,LRFN4,LIPG,TJP2,PLA2G1B,CNTFR,HJV,MXRA8,DUOX2,ADGRA2,CSPG4,CX3CR1,BOC,PTGFRN,SSC5D,NECTIN2,PCSK9,DPP4,DPP6,ENOX1,DSG2,HBEGF,ECE1,GPC6,ACE2,ATP6AP2,ENO2,EPHA4,EPHB6,STX2,FCER…
GO: Cellular Component	GO:0099091	postsynaptic specialization, intracellular component		3.866E-4	4.268E-1	4.065E-3	3.083E-2	11	38	DLGAP1,CTNNA2,TANC2,DLG3,BAIAP2,SH3GL3,FYN,IQSEC2,SHANK3,TANC1,ANKS1B
GO: Cellular Component	GO:0019897	extrinsic component of plasma membrane		3.929E-4	4.337E-1	4.092E-3	3.103E-2	32	189	TENM2,PLEKHA4,MYZAP,NUMA1,DGKI,CDH1,CDH11,CDH13,CDK16,CYTH2,CTNNA2,MAGI2,PCSK9,FARP1,APC2,KCNIP1,CNKSR2,SCUBE1,FYN,SRMS,GNAI3,GNAL,GNAS,GNAT1,GNAZ,GNG7,CARMIL2,CDH22,TIAM1,SHANK3,KCNAB1,SMAD7
GO: Cellular Component	GO:0031594	neuromuscular junction		4.224E-4	4.663E-1	4.358E-3	3.306E-2	20	98	ANK3,APP,MYH10,SYT2,TRIP4,DLGAP3,PRKAR1A,PRKCE,DLG2,DLG3,EPHA4,CIB2,DLGAP4,PPP1R9A,RPH3A,SLC8A3,SPOCK1,UTRN,KCNN3,LAMA4
GO: Cellular Component	GO:0043235	receptor complex		4.367E-4	4.821E-1	4.464E-3	3.386E-2	70	518	ACVR1,ACVRL1,LRP1B,APP,SKAP1,NRP2,BMPR1B,NOTCH2,NPR1,NTRK2,ROR1,SHISA9,CD40,HTR3B,CRLF1,PDGFRB,GPR37L1,DLGAP3,PLXNA1,CNTFR,HJV,GABBR2,CNIH3,PTPRN2,DLG2,DLG3,IMPG2,EPHA4,EPHA8,EPHB1,EPHB2,EPHB3,EPHB6,EPS8,CACNG3,FGFR1,FGFR3,FGFR2,NT5DC3,SHANK2,CACNG5,GABRB1,GABRE,GDNF,GFRA1,SYK,GRID2,GRIK3,GRIK4,GRIN2C,TRAF3,TSHR,VDR,VIPR1,PORCN,SHANK3,IGF1R,IL12RB1,INSR,ITGA5,ITGA9,ITGAE,ITGB4,ITPR2,ITPR3,KIT,IFN…
GO: Cellular Component	GO:0030315	T-tubule		4.925E-4	5.437E-1	4.961E-3	3.762E-2	16	71	ANK2,ANK3,ATP1A1,CACNA1C,CACNA1D,CACNA1S,CACNG1,CASQ1,AHNAK,AKAP6,PRKCE,SCN5A,SLC8A1,VDR,EZR,IGF1R
GO: Cellular Component	GO:0005929	cilium		4.943E-4	5.457E-1	4.961E-3	3.762E-2	104	836	ABCA4,MAP1B,AKT1,APP,CDC14A,ARL3,MAPK15,CATSPERG,BBS1,AJM1,UBXN10,NOTCH2,TSPEAR,ODF2,TTLL8,NEURL1,DNAAF1,MOSMO,EVI5L,PDE1C,CFAP251,PDE6B,GPR37L1,PEX6,CFAP54,TBC1D22A,CFAP45,ATXN10,STOML3,CNGA3,CATSPERZ,ONECUT2,MXRA8,PRKAR1A,CFAP61,CROCC,USP6NL,CPLANE2,IFT140,TRAF3IP1,IFT172,DCTN1,HAUS4,ULK4,DNAH6,DNAH8,DNAH9,RFX4,GRK1,KCTD10,AGBL2,CFAP69,JHY,ABCC4,TBC1D2,PDZD7,TBC1D16,PIBF1,CIB2,ATG7,ARFGEF2,ABLI…
GO: Cellular Component	GO:0030990	intraciliary transport particle		5.156E-4	5.692E-1	5.128E-3	3.889E-2	104	837	ABCA4,MAP1B,AKT1,APP,CDC14A,ARL3,MAPK15,CATSPERG,BBS1,AJM1,UBXN10,NOTCH2,TSPEAR,ODF2,TTLL8,NEURL1,DNAAF1,MOSMO,EVI5L,PDE1C,CFAP251,PDE6B,GPR37L1,PEX6,CFAP54,TBC1D22A,CFAP45,ATXN10,STOML3,CNGA3,CATSPERZ,ONECUT2,MXRA8,PRKAR1A,CFAP61,CROCC,USP6NL,CPLANE2,IFT140,TRAF3IP1,IFT172,DCTN1,HAUS4,ULK4,DNAH6,DNAH8,DNAH9,RFX4,GRK1,KCTD10,AGBL2,CFAP69,JHY,ABCC4,TBC1D2,PDZD7,TBC1D16,PIBF1,CIB2,ATG7,ARFGEF2,ABLI…
GO: Cellular Component	GO:0099061	integral component of postsynaptic density membrane		5.809E-4	6.413E-1	5.726E-3	4.343E-2	16	72	LRFN2,OPRD1,SHISA9,CHRM3,LRFN4,PTPRO,PTPRS,PTPRZ1,EFNB2,CACNG3,SCN8A,CLSTN1,SORCS3,CLSTN2,LRRC4,GRID2
GO: Cellular Component	GO:0099243	extrinsic component of synaptic membrane		6.239E-4	6.888E-1	6.096E-3	4.623E-2	8	23	TENM2,DGKI,CYTH2,CTNNA2,MAGI2,FARP1,CNKSR2,TIAM1
GO: Cellular Component	GO:0033268	node of Ranvier		6.343E-4	7.003E-1	6.121E-3	4.643E-2	7	18	ANK3,SPTBN4,CDH1,SCN8A,SPOCK1,NFASC,KCNQ3
GO: Cellular Component	GO:0044853	plasma membrane raft		6.377E-4	7.040E-1	6.121E-3	4.643E-2	24	131	SKAP1,ATP1A1,MYO1D,CACNA1C,CDH1,CDH13,AKAP6,PRKAR1A,LRRK2,EHD2,DLC1,SCN5A,HK1,CORO1C,TRPC4,VDR,EZR,HTR2A,ASAH2,IGF1R,INSR,KCNA5,KCND3,KCNMA1
GO: Cellular Component	GO:0005901	caveola		7.240E-4	7.993E-1	6.890E-3	5.226E-2	20	102	ATP1A1,CACNA1C,CDH1,CDH13,AKAP6,LRRK2,EHD2,DLC1,SCN5A,HK1,CORO1C,TRPC4,VDR,HTR2A,ASAH2,IGF1R,INSR,KCNA5,KCND3,KCNMA1
GO: Cellular Component	GO:0062023	collagen-containing extracellular matrix		7.681E-4	8.480E-1	7.248E-3	5.497E-2	64	474	MATN3,ADAM11,AEBP1,ANXA11,MUC1,LRRC15,BGN,BMP7,VWA2,COL6A6,CD151,CDH13,COL4A1,COL8A1,COL8A2,COL9A1,COL9A3,COL11A1,COL13A1,COL15A1,COL16A1,ADAMTS3,ADAMTS2,MMP28,CSPG4,CTSD,HTRA1,SSC5D,PTPRZ1,IMPG2,INHBE,GPC6,MEGF6,CELA1,FBLN1,FBLN2,FBN2,GPC4,ADAMTS20,GPC5,FGFR2,SEMA3C,FRAS1,SFRP1,SOD3,SPARC,COL25A1,SMOC2,GPC3,FREM3,THBS2,TNR,TNXB,USH2A,VWA1,ITGB4,ADAMTS9,NAV2,LAMA4,LAMB1,PAPLN,ADAMTS10,LOXL1,LTBP2
GO: Cellular Component	GO:0030658	transport vesicle membrane		8.160E-4	9.009E-1	7.635E-3	5.790E-2	36	230	MAP6,SCAMP5,BSN,SYT2,SYT7,OPRD1,PRKN,OTOF,CLTA,CNIH3,SEC24D,PTPRN2,PTPRS,LRRK2,PI4K2A,ATP8A1,TMEM184A,SVOP,SGTA,RPH3A,SLC6A9,SCAP,SV2C,SREBF1,ABCC8,SYN2,VMA21,SYCN,SEC23IP,ICA1,SLC6A17,LAMP5,ITPR1,TMEM163,SLC17A6,VTI1A
GO: Cellular Component	GO:0005768	endosome		8.954E-4	9.885E-1	8.252E-3	6.259E-2	115	956	ABHD17A,ABCA2,TPCN1,FZD7,EHBP1L1,SCAMP5,SORCS2,OSBPL9,OSBPL11,MMP14,VPS18,ANK2,GIT1,APP,TMEM108,ATP1A1,RAP2C,MYO1D,NF2,LDLRAD4,SLC11A2,ATP6V0E1,NTRK2,USP10,PRKN,CDH1,CLCN6,LIPG,SUN2,GRAP2,CLTA,DENND6B,SNX31,CCDC93,MCOLN2,SLC31A1,CD207,CHMP2B,AATK,RAPGEF2,CTSD,RAB11FIP3,MAGI2,PTPN1,DIO3,PCSK9,DOP1B,ATP9A,ECE1,VPS37B,IRAK4,RNFT1,DYNC1LI1,TNK2,EPHA4,EPHA8,EPHB1,LRRK2,PI4K2A,EHD2,TBC1D16,TMEM184A,TAB…
GO: Cellular Component	GO:0008076	voltage-gated potassium channel complex		8.970E-4	9.903E-1	8.252E-3	6.259E-2	18	89	DLG2,DPP6,KCNIP3,KCNIP1,KCNA5,KCNA7,KCNB1,KCND3,KCNG1,KCNH1,KCNH2,KCNJ6,KCNMA1,KCNN1,KCNN4,KCNQ1,KCNAB1,KCNQ3
GO: Cellular Component	GO:0098796	membrane protein complex		1.120E-3	1.000E0	1.022E-2	7.752E-2	152	1324	ABCA2,ACVR1,ACVRL1,MAP3K5,VPS18,PIK3R3,AP3B1,ARCN1,SKAP1,ATP1A1,ATP1A3,CATSPERG,MTX1,NAPA,NDUFB5,BMPR1B,AP1S2,AP1M1,CACNA1I,CACNA1G,PLEKHA7,CACNA1A,CACNA1C,CACNA1D,CACNA1E,CACNA1S,CACNG1,ATP6V0E1,CLIC6,SHISA9,PIGQ,CD40,SNTG2,HTR3B,CDH1,CDH11,CDH13,PDE4D,CACNA2D2,BEST3,DLGAP3,CLCN2,PIK3C2B,PIK3C2G,SUN2,CLTA,CNGA3,CNTFR,AKAP6,HJV,CATSPERZ,COL13A1,DUOX2,GABBR2,ADGRA2,CHMP2B,DNM3,DCTN1,CNIH3,SEC24D,A…
GO: Cellular Component	GO:0030133	transport vesicle		1.140E-3	1.000E0	1.032E-2	7.827E-2	60	445	MAP6,SCAMP5,APBA1,APBA2,APP,ARCN1,MADD,KIF1A,BGN,BSN,SYT2,SYT7,OPRD1,DGKI,PRKN,CDK16,PENK,OTOF,CLTA,SEPTIN5,PPT1,CNIH3,SEC24D,PTPRN2,PTPRS,CRISPLD2,STX2,LRRK2,PI4K2A,ATP8A1,TMEM184A,FGFR3,SVOP,SGTA,SIPA1,RPH3A,SLC6A9,SCAP,SV2C,DISC1,SREBF1,ABCC8,SYN2,GNAS,VMA21,ATP13A2,SYCN,TMEM168,SEC23IP,CADM1,ICA1,NKD2,SLC6A17,RNF112,LAMP5,ITPR1,TMEM163,SLC17A6,VTI1A,SSPN
GO: Cellular Component	GO:0098562	cytoplasmic side of membrane		1.290E-3	1.000E0	1.158E-2	8.779E-2	31	194	ANK1,PLEKHA4,MYZAP,CDH1,CDK16,PTPN1,EEF1A2,FARP1,LRRK2,KCNIP1,FGFR3,RASA3,THADA,FYN,CISD1,SPTB,SRMS,AJAP1,GNAI3,GNAL,GNAS,GNAT1,GNAZ,GNG7,CARMIL2,TIAM1,TRAF3,EZR,SHANK3,KCNAB1,KIT
GO: Cellular Component	GO:0005802	trans-Golgi network		1.449E-3	1.000E0	1.290E-2	9.783E-2	39	263	SCAMP5,APP,AP3B1,AP1S2,AP1M1,BSN,SLC11A2,LRBA,CDH1,CLTA,RBFOX1,USP6NL,COG3,ARFGAP3,DOP1B,COG7,ATP9A,LGR6,KIAA0319L,LRRK2,PI4K2A,ATP8A1,ATXN2,COG5,SLC66A2,ARFGEF2,ARFGAP2,SORL1,NMNAT2,CLASP2,ARFIP1,DPY30,DENND5A,GNAS,AP4E1,MICALL1,YIPF6,VTI1A,LLGL1
GO: Cellular Component	GO:0030016	myofibril		1.463E-3	1.000E0	1.292E-2	9.800E-2	37	246	ACTA1,ACTG1,ANK1,ANK2,ANK3,MYZAP,MYH3,MYL4,MYH13,CACNA1C,CACNA1D,CACNA1S,NRAP,CAPZB,CASQ1,PARVB,AHNAK,LMOD1,PDE4DIP,PSMA6,OBSCN,SCN5A,SCN8A,FHOD3,SLC8A1,ANKRD1,ABLIM2,SYNE2,MYO18B,PDLIM2,SYNE1,TPM3,CORO1C,TTN,KCNA5,C10orf71,JPH2
GO: Cellular Component	GO:0032839	dendrite cytoplasm		1.589E-3	1.000E0	1.392E-2	1.056E-1	10	38	ADA,WASF1,PURA,LRRK2,BAIAP2,GRIK3,HPCA,KCNAB1,KIF5A,KIF5C
GO: Cellular Component	GO:0043195	terminal bouton		1.648E-3	1.000E0	1.433E-2	1.086E-1	23	132	ADORA1,BSN,NTRK2,CAPZB,SYT7,PRKN,SEPTIN5,ERC2,CTNNA2,PTPRN2,LRRK2,SLC6A9,SHANK2,NMU,GHRH,RAPGEF4,GRIK3,GRIK4,GRM4,TNR,USH2A,ANKS1B,KCNMA1
GO: Cellular Component	GO:0106083	nuclear membrane protein complex		1.743E-3	1.000E0	1.469E-2	1.114E-1	5	11	SUN2,CLMN,SYNE2,SYNE1,SUN1
GO: Cellular Component	GO:0106094	nuclear membrane microtubule tethering complex		1.743E-3	1.000E0	1.469E-2	1.114E-1	5	11	SUN2,CLMN,SYNE2,SYNE1,SUN1
GO: Cellular Component	GO:0034992	microtubule organizing center attachment site		1.743E-3	1.000E0	1.469E-2	1.114E-1	5	11	SUN2,CLMN,SYNE2,SYNE1,SUN1
GO: Cellular Component	GO:0034993	meiotic nuclear membrane microtubule tethering complex		1.743E-3	1.000E0	1.469E-2	1.114E-1	5	11	SUN2,CLMN,SYNE2,SYNE1,SUN1
GO: Cellular Component	GO:0098831	presynaptic active zone cytoplasmic component		1.820E-3	1.000E0	1.504E-2	1.141E-1	7	21	PPFIA3,BSN,ERC2,CTBP2,CTNNA2,IQSEC2,RIMBP2
GO: Cellular Component	GO:0030673	axolemma		1.820E-3	1.000E0	1.504E-2	1.141E-1	7	21	ADORA1,ADORA2A,ANK1,MYO1D,SLC1A2,MAPK8IP3,KCNH1
GO: Cellular Component	GO:0070160	tight junction		1.826E-3	1.000E0	1.504E-2	1.141E-1	23	133	ANK3,MAPK15,RAP2C,NHS,CLDN24,MAGI1,CYTH2,TJP2,MXRA8,RAPGEF2,JAML,MAGI2,DLG3,PDCD6IP,PATJ,FRMD4A,TJP3,PARD6G,NFASC,FRMD4B,PARD6B,STRN,CLDN14
GO: Cellular Component	GO:0005923	bicellular tight junction		2.000E-3	1.000E0	1.636E-2	1.240E-1	22	126	ANK3,MAPK15,RAP2C,NHS,CLDN24,MAGI1,CYTH2,TJP2,MXRA8,RAPGEF2,JAML,MAGI2,DLG3,PDCD6IP,PATJ,FRMD4A,TJP3,PARD6G,FRMD4B,PARD6B,STRN,CLDN14
GO: Cellular Component	GO:0097440	apical dendrite		2.037E-3	1.000E0	1.654E-2	1.254E-1	8	27	MAP1B,MYO1D,NEURL1,ENPP1,ITSN1,SLC7A10,OSBP2,KIF5A
GO: Cellular Component	GO:0120111	neuron projection cytoplasm		2.058E-3	1.000E0	1.658E-2	1.258E-1	19	103	MAP6,ADA,AP3B1,MADD,TMEM108,KIF1A,BSN,WASF1,PURA,DLG2,LRRK2,BAIAP2,TRAK1,MAPK8IP3,GRIK3,HPCA,KCNAB1,KIF5A,KIF5C
GO: Cellular Component	GO:0098948	intrinsic component of postsynaptic specialization membrane		2.133E-3	1.000E0	1.707E-2	1.294E-1	20	111	ABHD17A,LRFN2,OPRD1,SHISA9,CHRM3,LRFN4,PTPRO,PTPRS,PTPRZ1,DLG2,EFNB2,CACNG3,SCN8A,CLSTN1,SORCS3,CLSTN2,LRRC4,GRID2,KCND3,CHRNA10
GO: Cellular Component	GO:0005930	axoneme		2.352E-3	1.000E0	1.857E-2	1.408E-1	36	244	CDC14A,ARL3,MAPK15,CATSPERG,BBS1,ODF2,TTLL8,DNAAF1,CFAP251,CFAP54,CATSPERZ,PRKAR1A,CFAP61,IFT140,TRAF3IP1,IFT172,DNAH6,DNAH8,DNAH9,CFAP69,ATG7,ARFGEF2,DNAI1,SEPTIN9,LCA5L,CDH23,GLI2,TCP11,TIAM1,DNAI2,HK1,CATSPERD,CCDC114,CFAP74,MAP1LC3B,PACRG
GO: Cellular Component	GO:0016528	sarcoplasm		2.355E-3	1.000E0	1.857E-2	1.408E-1	17	89	ANK1,ANK3,CACNA1S,CAMK2B,CASQ1,CCDC78,AKAP6,DMPK,SLC8A3,JPH4,SPOCK1,SYNE2,ITPR1,ITPR2,ITPR3,JPH2,JPH3
GO: Cellular Component	GO:0097014	ciliary plasm		2.523E-3	1.000E0	1.975E-2	1.498E-1	36	245	CDC14A,ARL3,MAPK15,CATSPERG,BBS1,ODF2,TTLL8,DNAAF1,CFAP251,CFAP54,CATSPERZ,PRKAR1A,CFAP61,IFT140,TRAF3IP1,IFT172,DNAH6,DNAH8,DNAH9,CFAP69,ATG7,ARFGEF2,DNAI1,SEPTIN9,LCA5L,CDH23,GLI2,TCP11,TIAM1,DNAI2,HK1,CATSPERD,CCDC114,CFAP74,MAP1LC3B,PACRG
GO: Cellular Component	GO:0043198	dendritic shaft		2.699E-3	1.000E0	2.092E-2	1.586E-1	14	68	APP,CACNA1C,NSF,CNIH3,DLG3,EPHA4,BAIAP2,SLC1A2,SLC8A1,JPH4,KIRREL3,GRM4,GRIP2,HTR2A
GO: Cellular Component	GO:0097457	hippocampal mossy fiber		2.728E-3	1.000E0	2.092E-2	1.586E-1	12	54	MAP1B,BSN,CAPZB,SYT7,PDE2A,CTNNA2,SLC6A9,SHANK2,RAPGEF4,GRIK4,TNR,ANKS1B
GO: Cellular Component	GO:0099738	cell cortex region		2.728E-3	1.000E0	2.092E-2	1.586E-1	12	54	PPFIA3,BSN,NUMA1,CLTA,ERC2,CTBP2,CTNNA2,DCTN1,ENO2,IQSEC2,CLASP2,RIMBP2
GO: Cellular Component	GO:0070852	cell body fiber		2.766E-3	1.000E0	2.106E-2	1.597E-1	5	12	SPTBN4,ASS1,PENK,CADM1,HTR2A
GO: Cellular Component	GO:0055037	recycling endosome		3.098E-3	1.000E0	2.343E-2	1.777E-1	29	188	ABHD17A,FZD7,SCAMP5,SORCS2,ANK2,APP,RAP2C,SLC11A2,DENND6B,MCOLN2,SLC31A1,AATK,RAB11FIP3,ATP9A,EHD2,ITSN1,RAB11FIP2,ARFGEF2,SLC39A4,RAB11FIP1,SORL1,SLC9A9,DENND2B,GNAS,GRIP1,NISCH,TUBG1,MICALL1,LAMP5
GO: Cellular Component	GO:0030285	integral component of synaptic vesicle membrane		3.134E-3	1.000E0	2.353E-2	1.785E-1	11	48	SCAMP5,SYT2,OPRD1,PTPRN2,PTPRS,ATP8A1,SLC6A9,SV2C,SLC6A17,TMEM163,SLC17A6
GO: Cellular Component	GO:0044302	dentate gyrus mossy fiber		3.208E-3	1.000E0	2.393E-2	1.815E-1	12	55	MAP1B,BSN,CAPZB,SYT7,PDE2A,CTNNA2,SLC6A9,SHANK2,RAPGEF4,GRIK4,TNR,ANKS1B
GO: Cellular Component	GO:0044305	calyx of Held		3.347E-3	1.000E0	2.480E-2	1.881E-1	8	29	ACTG1,ADORA1,GIT1,ATP1A3,SEPTIN5,PRKCB,GIT2,ITSN1
GO: Cellular Component	GO:0043292	contractile fiber		3.605E-3	1.000E0	2.653E-2	2.012E-1	37	259	ACTA1,ACTG1,ANK1,ANK2,ANK3,MYZAP,MYH3,MYL4,MYH13,CACNA1C,CACNA1D,CACNA1S,NRAP,CAPZB,CASQ1,PARVB,AHNAK,LMOD1,PDE4DIP,PSMA6,OBSCN,SCN5A,SCN8A,FHOD3,SLC8A1,ANKRD1,ABLIM2,SYNE2,MYO18B,PDLIM2,SYNE1,TPM3,CORO1C,TTN,KCNA5,C10orf71,JPH2
GO: Cellular Component	GO:0016328	lateral plasma membrane		3.695E-3	1.000E0	2.701E-2	2.049E-1	13	63	ANK3,NUMA1,CDH1,IQGAP3,PTPRO,DSG2,SCN5A,FGF13,PRICKLE2,MTCL1,CORO1C,NKD2,KCNB1
GO: Cellular Component	GO:0032587	ruffle membrane		3.914E-3	1.000E0	2.843E-2	2.156E-1	18	101	EPB41L5,KSR1,NF2,SYNJ2,AIF1L,PTPRZ1,MTSS2,EPS8,DLC1,CLASP2,KANK1,WWC1,PIP5K1C,TIAM1,CORO1C,EZR,ITGA5,SPRY4
GO: Cellular Component	GO:0035371	microtubule plus-end		4.257E-3	1.000E0	3.072E-2	2.330E-1	7	24	NCKAP5L,SKAP1,NUMA1,DCTN1,CDK5RAP2,CLASP2,MAPRE2
GO: Cellular Component	GO:0030864	cortical actin cytoskeleton		4.361E-3	1.000E0	3.125E-2	2.370E-1	18	102	MOBP,SHROOM3,MYZAP,SPTBN4,MYO1E,NF2,CDH1,MTSS2,DLC1,CAP2,CIB2,PPP1R9A,SPTB,PDLIM2,AKAP13,UTRN,WIPF2,LLGL1
GO: Cellular Component	GO:0016529	sarcoplasmic reticulum		4.387E-3	1.000E0	3.125E-2	2.370E-1	15	79	ANK1,ANK3,CACNA1S,CAMK2B,CASQ1,CCDC78,AKAP6,DMPK,JPH4,SYNE2,ITPR1,ITPR2,ITPR3,JPH2,JPH3
GO: Cellular Component	GO:0005581	collagen trimer		4.608E-3	1.000E0	3.261E-2	2.473E-1	16	87	MARCO,COL6A6,C1QL3,COL4A1,COL8A1,COL8A2,COL9A1,COL9A3,COL11A1,COL13A1,COL15A1,COL16A1,EDA,COL25A1,C1QL1,C1QL4
GO: Cellular Component	GO:0009898	cytoplasmic side of plasma membrane		4.703E-3	1.000E0	3.307E-2	2.508E-1	26	168	ANK1,PLEKHA4,MYZAP,CDH1,CDK16,FARP1,KCNIP1,FGFR3,RASA3,FYN,SPTB,SRMS,AJAP1,GNAI3,GNAL,GNAS,GNAT1,GNAZ,GNG7,CARMIL2,TIAM1,TRAF3,EZR,SHANK3,KCNAB1,KIT
GO: Cellular Component	GO:0005635	nuclear envelope		5.057E-3	1.000E0	3.534E-2	2.680E-1	63	503	PARP1,OSBPL6,ANXA11,APP,TNKS,MAJIN,LMNTD1,NUP98,INA,PDE4D,NUP210L,RCC1,PIK3C2G,SUN2,RBM15B,AKAP6,PTGES,MAD2L1BP,DNAJB12,TOR4A,DCTN1,DHCR7,DMPK,LRPPRC,CLMN,JPT1,DHRS2,CASC3,ITSN1,ATF6,IPO9,NDC1,PRICKLE2,WDFY3,PCID2,SORL1,GABRB1,NUP50,SREBF1,LPIN1,TNRC18,SYNE2,TOR1B,GNAZ,SYNE1,SUN1,XPO4,PLCD4,PNPLA7,KPNA6,SLC2A9,INSR,ITPR1,ITPR3,KCNH1,KCNH2,TMC8,TRPC7,NUP107,CERS6,LMNB1,LMO7,SMAD3
GO: Cellular Component	GO:0016460	myosin II complex		5.459E-3	1.000E0	3.790E-2	2.875E-1	7	25	MYH3,MYH10,MYH13,MYH14,OBSCN,LIMCH1,TTN
GO: Cellular Component	GO:0014704	intercalated disc		5.603E-3	1.000E0	3.866E-2	2.932E-1	13	66	ANK2,ANK3,SPTBN4,ATP1A1,NRAP,CAPZB,AKAP6,DSG2,OBSCN,SCN5A,FGF13,SLC8A1,KCNA5
GO: Cellular Component	GO:0098892	extrinsic component of postsynaptic specialization membrane		5.786E-3	1.000E0	3.919E-2	2.972E-1	4	9	DGKI,CYTH2,CNKSR2,TIAM1
GO: Cellular Component	GO:0014701	junctional sarcoplasmic reticulum membrane		5.786E-3	1.000E0	3.919E-2	2.972E-1	4	9	AKAP6,JPH4,JPH2,JPH3
GO: Cellular Component	GO:0014731	spectrin-associated cytoskeleton		5.786E-3	1.000E0	3.919E-2	2.972E-1	4	9	ANK1,ANK3,SPTB,RHBG
GO: Cellular Component	GO:0005604	basement membrane		5.955E-3	1.000E0	3.986E-2	3.023E-1	19	113	VWA2,CD151,COL4A1,COL8A1,COL8A2,COL15A1,FBLN1,FRAS1,SPARC,SMOC2,FREM3,THBS2,USH2A,VWA1,ITGB4,LAMA4,LAMB1,PAPLN,LOXL1
GO: Cellular Component	GO:0099060	integral component of postsynaptic specialization membrane		5.958E-3	1.000E0	3.986E-2	3.023E-1	18	105	LRFN2,OPRD1,SHISA9,CHRM3,LRFN4,PTPRO,PTPRS,PTPRZ1,EFNB2,CACNG3,SCN8A,CLSTN1,SORCS3,CLSTN2,LRRC4,GRID2,KCND3,CHRNA10
GO: Cellular Component	GO:0019867	outer membrane		6.349E-3	1.000E0	4.223E-2	3.203E-1	31	215	ACACB,ASS1,MTX1,SYNJ2,WASF1,SLC11A2,PDE2A,PMAIP1,DHCR7,CYB5R3,DMPK,LRPPRC,CLMN,RHOT1,EPHA4,LRRK2,ACSL4,SLC8A3,SOX10,CISD1,LPIN1,SYNE2,ACSL6,SYNE1,ANKH,CYB5B,SLC44A1,HADHB,HK1,PINK1,ITPR3
GO: Cellular Component	GO:0033503	HULC complex		6.417E-3	1.000E0	4.242E-2	3.217E-1	3	5	RNF20,UBE2A,UBE2B
GO: Cellular Component	GO:0005640	nuclear outer membrane		6.897E-3	1.000E0	4.532E-2	3.437E-1	7	26	DHCR7,DMPK,LRPPRC,CLMN,SYNE2,SYNE1,ITPR3
GO: Cellular Component	GO:0031234	extrinsic component of cytoplasmic side of plasma membrane		7.269E-3	1.000E0	4.748E-2	3.601E-1	17	99	PLEKHA4,MYZAP,CDK16,FARP1,KCNIP1,FYN,SRMS,GNAI3,GNAL,GNAS,GNAT1,GNAZ,GNG7,CARMIL2,TIAM1,SHANK3,KCNAB1
GO: Cellular Component	GO:0005795	Golgi stack		7.493E-3	1.000E0	4.837E-2	3.669E-1	24	157	ABO,ZFYVE1,B4GALT4,ASAP2,B4GALNT3,NSF,B4GALT5,SGMS1,HID1,COG3,RASIP1,CHPF,ST6GAL1,ST3GAL3,FUT2,SORL1,XYLT1,SULF2,GLG1,CIT,MGAT4B,ICA1,YIPF6,LLGL1
GO: Cellular Component	GO:0031674	I band		7.493E-3	1.000E0	4.837E-2	3.669E-1	24	157	ANK1,ANK2,ANK3,MYZAP,CACNA1C,CACNA1D,CACNA1S,NRAP,CAPZB,CASQ1,PARVB,OBSCN,SCN5A,SCN8A,FHOD3,SLC8A1,ANKRD1,SYNE2,MYO18B,PDLIM2,TTN,KCNA5,C10orf71,JPH2
GO: Cellular Component	GO:0098688	parallel fiber to Purkinje cell synapse		7.828E-3	1.000E0	4.998E-2	3.791E-1	8	33	CADM3,CTNNA2,SCN8A,SLC6A9,GRID2,GRM4,KCNH1,KCNJ6
GO: Cellular Component	GO:0030017	sarcomere		7.833E-3	1.000E0	4.998E-2	3.791E-1	32	227	ACTA1,ANK1,ANK2,ANK3,MYZAP,MYH3,MYL4,CACNA1C,CACNA1D,CACNA1S,NRAP,CAPZB,CASQ1,PARVB,LMOD1,PSMA6,OBSCN,SCN5A,SCN8A,FHOD3,SLC8A1,ANKRD1,SYNE2,MYO18B,PDLIM2,SYNE1,TPM3,CORO1C,TTN,KCNA5,C10orf71,JPH2
Mouse Phenotype	MP:0003635	abnormal synaptic transmission		1.146E-11	8.700E-8	8.700E-8	8.276E-7	207	1041	MAP6,MBP,BTBD9,ACVRL1,ELFN2,DSCAML1,KLHL29,ADORA1,ARID1B,LRFN2,MTA3,AKT1,SEMA6A,TRIB2,GIT1,APBA1,APBA2,DGKE,BCAS1,APP,AP3B1,MADD,SLC25A12,TMEM108,ATP1A3,NPAS4,NEXMIF,ADGRB3,NAPA,RTL4,KSR1,CACNA1G,BSN,WASF1,NPAS1,NPAS2,CACNA1A,CACNA1C,CACNA1E,CAMK2B,NTRK2,NR4A2,IGSF11,SYT2,SHISA9,CD9,PRKN,SRRM3,PCDH9,LGI1,DLGAP2,CACNA2D2,PDGFRB,CHRM3,DLGAP3,LRFN4,NRXN3,NRXN2,OTOF,PITX3,FTO,COL13A1,MAGED1,SEPTIN5,D…
Mouse Phenotype	MP:0002152	abnormal brain morphology		2.524E-11	1.917E-7	9.510E-8	9.047E-7	333	1886	MAP1B,MBP,ACVR1,ACVRL1,TENM2,MEIS1,ADCY9,MAP3K4,AXIN2,FZD9,PARP1,ARID1B,LRFN2,ATXN3,SORCS2,AKT1,SEMA6A,KIF6,VPS18,SHROOM3,TRIB2,ANK1,ANK2,ANK3,APBB2,APP,AP3B1,SEMA4G,ARCN1,SPTBN4,MSX1,PHOX2A,CCDC124,SLC25A12,ASS1,KCNK5,NCOA1,TMEM108,ATP1A3,GRHL3,MYH10,MYO10,BBS1,NAPA,NRP2,BMP7,NEUROD2,NF2,NFIB,NFIX,CYP26C1,CACNA1G,HERC2,WASF1,CDK5R2,NOTCH2,CACNA1A,CACNA1C,CACNA1D,SLC11A2,NTRK2,ROR1,BRSK2,NR4A2,BT…
Mouse Phenotype	MP:0002206	abnormal CNS synaptic transmission		3.757E-11	2.853E-7	9.510E-8	9.047E-7	171	827	MAP6,MBP,BTBD9,ELFN2,DSCAML1,KLHL29,ADORA1,ARID1B,LRFN2,MTA3,AKT1,SEMA6A,TRIB2,GIT1,APBA1,APBA2,DGKE,BCAS1,APP,MADD,TMEM108,ATP1A3,NPAS4,NEXMIF,ADGRB3,NAPA,KSR1,BSN,WASF1,NPAS1,CACNA1A,CACNA1C,CAMK2B,NTRK2,IGSF11,SYT2,SHISA9,SRRM3,PCDH9,LGI1,DLGAP2,CACNA2D2,PDGFRB,CHRM3,DLGAP3,LRFN4,NRXN3,NRXN2,OTOF,SEPTIN5,DUOX2,GABBR2,PREP,SETBP1,RBFOX1,DNM3,ERC2,FAM53B,CTNNA2,DNAJB12,HMGN5,ZNF536,TOX,CNIH3,PTP…
Mouse Phenotype	MP:0002882	abnormal neuron morphology		5.419E-10	4.115E-6	1.029E-6	9.787E-6	301	1712	ABCA2,ABCA4,MAP1B,MAP6,MBP,MCF2,ACVRL1,TENM2,DSCAML1,UNC5A,ARID1B,LRFN2,ATXN3,SORCS2,SEMA6A,VPS18,TRIB2,ANK1,ANK2,ANK3,GIT1,APBB2,GAS7,BCAS1,APP,SEMA4G,ARCN1,MADD,SPTBN4,MSX1,PHOX2A,ARL3,SLC25A12,NCOA1,TMEM108,ATP1A3,NPAS4,MYH10,KIF1A,LRSAM1,ADGRB3,BBS1,NAPA,NRP2,BMPR1B,NF2,NFATC2,SYNJ2,NFE2L2,AP1S2,CACNA1G,HERC2,BSN,WASF1,MYRF,CDK5R2,NOTCH2,CACNA1A,CACNA1D,NPR2,C1QL3,NTRK2,ROR1,BRSK2,CAPZB,NR4A2…
Mouse Phenotype	MP:0010195	abnormal lymphatic vessel endothelium morphology		6.188E-8	4.699E-4	9.399E-5	8.941E-4	10	12	HEG1,NRP2,PLXNA1,PROX1,SEMA3F,SYK,NR2F2,CYP26B1,RBPJ,SEMA3G
Mouse Phenotype	MP:0009745	abnormal behavioral response to xenobiotic		1.892E-7	1.437E-3	2.395E-4	2.278E-3	74	319	MAP6,MBP,ELFN2,FZD9,ADORA2A,SORCS2,UNC79,APBA1,SLC25A12,ATP1A1,ATP1A3,NRP2,NEUROD2,CACNA1G,BSN,CACNA1A,NTRK2,NR4A2,OPRD1,PRKN,CD81,LGI1,CACNA2D2,PENK,DLGAP3,CDYL,MTO1,GABBR2,RBFOX1,PRKCE,ZBTB20,PTPRO,PDE11A,HBEGF,MBNL2,ENO2,EPS8,LRRK2,KCNIP1,SCN8A,NACC1,PPP1R9A,SLC1A2,SLC1A3,CYFIP2,FGF22,SLC6A1,SLC6A9,SLC6A11,PRICKLE2,FYN,GABRB1,GABRE,DISC1,IQSEC2,NPAS3,NCDN,GNAS,GNAZ,ADGRL3,SZT2,GRIK4,CIT,PARK7,…
Mouse Phenotype	MP:0009538	abnormal synapse morphology		2.725E-7	2.069E-3	2.519E-4	2.397E-3	59	237	MAP6,LRFN2,GAS7,APP,MADD,KIF1A,LRSAM1,NAPA,AP1S2,BSN,CACNA1A,C1QL3,NTRK2,ROR1,DLGAP2,CACNA2D2,LRFN4,NRXN3,ECEL1,COL13A1,GABBR2,CHMP2B,DNM3,ERC2,DCTN1,DLG3,EEF1A2,MBNL2,SCN8A,FGFR2,DLGAP4,SH3GL3,FGF22,SLC6A8,SHANK2,KIF21B,NKX6-2,NFASC,CLSTN2,KIRREL3,SYNE2,SYN2,GPT2,SYNE1,GRID2,GRIK4,ZDHHC17,TAFA2,IGSF21,TNR,UTRN,RBFOX3,SHANK3,IGHMBP2,SLC17A6,UBE3B,LAMA4,LMX1B,LRP1
Mouse Phenotype	MP:0002063	abnormal learning/memory/conditioning		2.812E-7	2.136E-3	2.519E-4	2.397E-3	142	740	MAP1B,MBP,ADAM11,BTBD9,ADARB2,FZD9,ADORA2A,PTCHD1,ARID1B,LRFN2,ATXN3,TRIB2,SH3RF1,GIT1,APBA2,APOD,APP,NCOA1,TMEM108,ATP1A1,ATP1A3,MYO10,ADGRB1,ADGRB3,RTL4,KSR1,KLF9,AP1S2,CACNA1G,WASF1,NPAS1,NPAS2,CACNA1C,CAMK2B,C1QL3,NTRK2,NR4A2,OXTR,NEURL1,PRKN,PBX3,PCDH9,DLGAP2,PENK,GPR37L1,CHRM3,DSTYK,PITX3,JAKMIP1,MAGED1,SEPTIN5,GABBR2,GTF2IRD1,CSK,ITSN2,AUTS2,ERC2,PRKCB,CTNNA2,ZBTB20,PTPRZ1,DLG3,HBEGF,MBNL2…
Mouse Phenotype	MP:0008415	abnormal neurite morphology		3.308E-7	2.512E-3	2.519E-4	2.397E-3	106	515	ABCA2,MAP1B,MBP,MCF2,LRFN2,SORCS2,SEMA6A,ANK2,ANK3,GIT1,BCAS1,ARCN1,SPTBN4,TMEM108,MYH10,LRSAM1,BBS1,NRP2,NF2,NFE2L2,HERC2,CACNA1A,NTRK2,SEMA5A,PCDH9,DLGAP2,CACNA2D2,CLCN2,CLCN6,SEMA5B,SUN2,PITX3,PLXNA1,CNTN1,GAL3ST1,CHMP2B,AATK,RBFOX1,PRKAB1,DAB2IP,SNPH,ZBTB20,PURA,DLG3,FEZF2,EFNB2,DYNC1LI1,RHOT1,EPHA4,EPHB1,EPHB2,EPHB3,LRRK2,PI4K2A,ATXN1,FGF13,ATG7,KIF21A,DLGAP4,SIM2,CLSTN1,SLC1A3,CYFIP2,CAMKK2…
Mouse Phenotype	MP:0014114	abnormal cognition		3.318E-7	2.519E-3	2.519E-4	2.397E-3	142	742	MAP1B,MBP,ADAM11,BTBD9,ADARB2,FZD9,ADORA2A,PTCHD1,ARID1B,LRFN2,ATXN3,TRIB2,SH3RF1,GIT1,APBA2,APOD,APP,NCOA1,TMEM108,ATP1A1,ATP1A3,MYO10,ADGRB1,ADGRB3,RTL4,KSR1,KLF9,AP1S2,CACNA1G,WASF1,NPAS1,NPAS2,CACNA1C,CAMK2B,C1QL3,NTRK2,NR4A2,OXTR,NEURL1,PRKN,PBX3,PCDH9,DLGAP2,PENK,GPR37L1,CHRM3,DSTYK,PITX3,JAKMIP1,MAGED1,SEPTIN5,GABBR2,GTF2IRD1,CSK,ITSN2,AUTS2,ERC2,PRKCB,CTNNA2,ZBTB20,PTPRZ1,DLG3,HBEGF,MBNL2…
Mouse Phenotype	MP:0010197	abnormal lymphatic vessel endothelial cell morphology		4.044E-7	3.071E-3	2.792E-4	2.655E-3	9	11	NRP2,PLXNA1,PROX1,SEMA3F,SYK,NR2F2,CYP26B1,RBPJ,SEMA3G
Mouse Phenotype	MP:0002272	abnormal nervous system electrophysiology		5.923E-7	4.498E-3	3.748E-4	3.565E-3	82	375	MAP1B,MBP,ADORA1,PTCHD1,SEMA6A,ABCD1,ANK3,GIT1,MYZAP,MADD,ATP1A3,LRSAM1,ADGRB3,NF2,CACNA1G,BSN,NPAS2,CACNA1A,CACNA1D,SHISA9,PRKN,LGI1,CACNA2D2,PDGFRB,CHRM3,CLCN2,JAKMIP1,STOML3,GABBR2,FEV,DPP6,DYNC1LI1,EPHA4,LRRK2,SCN5A,SCN8A,FGFR1,DLGAP4,SLC1A2,SLC1A3,SLC6A9,RGS14,SIRT2,TPH2,GABRB1,SOX10,SLC9A9,JPH4,NKX6-2,CDH23,NFASC,PDE10A,C1QL1,LPIN1,FGD4,SYN2,GNG7,TCF4,GRID2,GRIK4,SIK3,TNR,PARK7,TRPC4,HLF,KC…
Mouse Phenotype	MP:0002081	perinatal lethality		1.541E-6	1.170E-2	9.001E-4	8.562E-3	237	1401	MAP1B,MAP6,ACTG1,ACVR1,ADA,MEIS2,MAP3K4,ARID1B,EHBP1L1,AEBP1,AKT1,MMP14,UNC79,MNT,TSHZ3,SHROOM3,ANK1,ANK2,ANK3,UNCX,GIT1,APBA1,APBA2,CITED1,AP3B1,MADD,MSX1,ASS1,ATP1A3,GRHL3,MTX1,MYH10,MYLK,KIF1A,NAPA,BGN,NRP2,BMP7,NF2,NFE2,NFIB,CDK5R2,NOTCH2,NPHS1,CACNA1A,CACNA1C,CACNA1S,NTRK2,ROR1,BRSK2,NUP98,NR4A2,RIPK4,RUNX2,SLC7A7,OTX1,OXCT1,DPP9,PBX1,PBX3,SRRM3,CDH1,CDKN1C,PDE4D,CRLF1,PDGFRB,BLNK,CARD10,NRX…
Mouse Phenotype	MP:0000787	abnormal telencephalon morphology		1.853E-6	1.407E-2	1.005E-3	9.560E-3	166	922	MAP1B,MBP,TENM2,FZD9,ARID1B,LRFN2,SORCS2,SEMA6A,KIF6,VPS18,TRIB2,ANK2,ANK3,APBB2,APP,AP3B1,SPTBN4,SLC25A12,TMEM108,ATP1A3,MYH10,BBS1,NAPA,NRP2,NFIB,NFIX,WASF1,CDK5R2,CACNA1C,NTRK2,BRSK2,OTX1,PRKN,CD81,DNAAF1,PCDH9,LGI1,PDE6B,PDHA1,DLGAP3,CFAP54,CLCN2,PITX3,JAKMIP1,CNGA3,COL4A1,ADAMTS3,GABBR2,ADGRA2,CHMP2B,NCOR2,CSK,SH3PXD2A,CSPG4,ITSN2,PRKAB1,FEV,CTNNA2,CTSD,TCF7L1,PROX1,ZBTB20,IFT172,DAB1,PTPRS,…
Mouse Phenotype	MP:0002915	abnormal synaptic depression		2.328E-6	1.768E-2	1.179E-3	1.121E-2	38	137	ADORA1,ADGRB3,BSN,WASF1,CAMK2B,SHISA9,NRXN3,NRXN2,EFNB2,RXRB,DLGAP4,SH3GL3,FGF22,SLC8A2,SHANK2,SORCS3,DISC1,NCDN,C1QL1,SYN2,WWC1,GRID2,SRCIN1,PIP5K1C,GRIP1,GRIP2,PARK7,UBE2A,SHANK3,ELFN1,PINK1,DPYSL5,ANKS1B,ITPR1,GRID2IP,KCNMA1,SLC17A6,LMX1B
Mouse Phenotype	MP:0001516	abnormal motor coordination/balance		3.558E-6	2.702E-2	1.689E-3	1.606E-2	165	925	ABCA2,MAP1B,MBP,ADAM11,ACVR1,ARID1B,ATXN3,ABCD1,TRIB2,ANK1,ANK2,ANK3,GIT1,APBA1,APBA2,GAS7,APP,ARAF,ARCN1,SPTBN4,SLC25A12,NCOA1,ATP1A3,MYH10,KIF1A,NAPA,BMP7,NEUROD2,NF2,KLF9,NFIX,AP1S2,CACNA1G,HERC2,BSN,WASF1,MYRF,CACNA1A,CACNA1C,CAMK2B,C1QL3,MYO1H,NTRK2,NR4A2,SYT2,PRKN,PAX7,PBX3,SRRM3,PCDH9,OTOG,CACNA2D2,GPR37L1,SUN2,PITX3,JAKMIP1,MTO1,CNTN1,SLC31A1,GAL3ST1,IGDCC3,GTF2IRD1,PPP2R5C,ITSN2,RBFOX1,P…
Mouse Phenotype	MP:0002572	abnormal emotion/affect behavior		4.210E-6	3.197E-2	1.881E-3	1.789E-2	133	716	ABCA2,MAP1B,MAP6,ADARB2,ELFN2,ADORA1,ADORA2A,PTCHD1,ARID1B,LRFN2,MTA3,ATXN3,TRIB2,SH3RF1,GIT1,APBA2,BCAS1,APP,ARAF,SLC25A12,ATP1A1,ATP1A3,NPAS4,MYO10,ADGRB1,ADGRB2,BBS1,RTL4,NFATC2,AP1S2,WASF1,CACNA1C,CACNA1E,NRAP,CAMK2B,C1QL3,NTRK2,NR4A2,OPRD1,OXTR,PRKN,PBX3,DLGAP2,DLGAP1,PENK,B4GALT5,ZNF462,DLGAP3,CLCN6,NRXN2,PITX3,JAKMIP1,MTO1,MAGED1,SEPTIN5,GABBR2,GTF2IRD1,CSK,AUTS2,ERC2,FEV,ZFP42,ZBTB20,PTGF…
Mouse Phenotype	MP:0000783	abnormal forebrain morphology		4.942E-6	3.753E-2	2.085E-3	1.983E-2	200	1167	MAP1B,MBP,TENM2,FZD9,ARID1B,LRFN2,SORCS2,SEMA6A,KIF6,VPS18,TRIB2,ANK2,ANK3,APBB2,APP,AP3B1,SPTBN4,MSX1,SLC25A12,TMEM108,ATP1A3,MYH10,BBS1,NAPA,NRP2,NFIB,NFIX,CYP26C1,WASF1,CDK5R2,NOTCH2,CACNA1C,NTRK2,BRSK2,NR4A2,PIGQ,OTX1,PRKN,CD81,DNAAF1,PCDH9,LGI1,CACNA2D2,PDE6B,PDHA1,ENPP2,PDZK1,DLGAP3,CFAP54,CLCN2,PITX3,JAKMIP1,CNGA3,COL4A1,ADAMTS3,DUOX2,GABBR2,ADGRA2,CHMP2B,NCOR2,CSK,SH3PXD2A,CSPG4,ITSN2,PRK…
Mouse Phenotype	MP:0000778	abnormal nervous system tract morphology		6.074E-6	4.613E-2	2.341E-3	2.227E-2	55	236	MAP1B,MBP,ARID1B,ANK2,APBB2,APP,AP3B1,MSX1,NAPA,NRP2,NFIB,NFIX,WASF1,OTX1,CD81,CDH11,PDHA1,CLCN2,ITSN2,DHCR7,PURA,ULK4,FEZF2,EBF1,EFNB2,ZDHHC9,EPHA4,EPHA8,EPHB1,EPHB2,EPHB3,EXT1,FGFR1,FGFR2,SEMA3F,ITSN1,SIM2,SLIT1,SLIT3,DMRTA2,FYN,SOX3,NMNAT2,ZNF423,IQSEC2,NPAS3,MAPK8IP3,GPM6B,NR2F1,AP4E1,NDST1,SHANK3,ITPR3,UBE3B,VTI1A
Mouse Phenotype	MP:0008540	abnormal cerebral hemisphere morphology		6.166E-6	4.682E-2	2.341E-3	2.227E-2	129	695	MAP1B,MBP,TENM2,FZD9,ARID1B,LRFN2,SORCS2,SEMA6A,VPS18,TRIB2,ANK2,ANK3,APBB2,APP,AP3B1,SPTBN4,TMEM108,ATP1A3,MYH10,BBS1,NAPA,NRP2,NFIB,NFIX,WASF1,CDK5R2,NTRK2,BRSK2,OTX1,PRKN,CD81,DNAAF1,PCDH9,LGI1,PDE6B,PDHA1,CFAP54,CLCN2,COL4A1,GABBR2,CHMP2B,NCOR2,CSPG4,ITSN2,PRKAB1,FEV,CTNNA2,CTSD,PROX1,ZBTB20,DAB1,DHCR7,PURA,ULK4,DLG3,PDCD6IP,FEZF2,HBEGF,RFX4,ZDHHC9,LEF1,ENO2,RHOT1,EPHA4,EPHB1,EPHB2,EPHB3,APC2…
Mouse Phenotype	MP:0002058	neonatal lethality		6.643E-6	5.045E-2	2.402E-3	2.285E-2	179	1029	MAP1B,MAP6,ACVR1,ADA,MEIS2,EHBP1L1,MMP14,MNT,TSHZ3,ANK1,ANK2,GIT1,APBA1,APBA2,CITED1,AP3B1,MADD,MSX1,ASS1,ATP1A3,MTX1,MYH10,MYLK,KIF1A,NAPA,BMP7,NFE2,NFIB,NOTCH2,NPHS1,CACNA1A,CACNA1C,NTRK2,ROR1,BRSK2,NR4A2,RUNX2,SLC7A7,OTX1,OXCT1,DPP9,PBX1,PBX3,SRRM3,CDH1,CDKN1C,PDE4D,CRLF1,NRXN3,NRXN2,SUN2,PIP4K2A,PKP1,ECEL1,CNN3,CARD14,CNTFR,AKAP6,PRRX1,COL11A1,PODXL,EGLN1,SOSTDC1,CHST11,ADGRA2,CREB5,FOXP4,PPP…
Mouse Phenotype	MP:0002910	abnormal excitatory postsynaptic currents		8.885E-6	6.747E-2	3.067E-3	2.917E-2	40	155	DSCAML1,ADORA1,LRFN2,APBA1,APBA2,APP,MADD,TMEM108,NAPA,CACNA1A,IGSF11,SYT2,SHISA9,NRXN3,NRXN2,GABBR2,DNM3,DLG2,DLG3,EPS8,LRRK2,EXT1,CACNG3,FGF13,DLGAP4,PPP1R9A,SH3GL3,CLSTN1,SLC1A3,GRID2,GRIK4,GRIN2C,RIMBP2,SEZ6L,TRPC4,SHANK3,ELFN1,ANKS1B,ITPR1,SLC17A6
Mouse Phenotype	MP:0001392	abnormal locomotor behavior		1.117E-5	8.481E-2	3.688E-3	3.508E-2	304	1912	ABCA2,MAP1B,MAP6,ACTA1,MBP,ACTG1,ACVR1,BTBD9,ELFN2,ADORA2A,PTCHD1,ARID1B,SCAMP5,ATXN3,SORCS2,AKT1,ABCD1,MMP14,UNC79,TSHZ3,KIF6,TRIB2,ANK2,ANK3,OSTM1,GIT1,APBA1,APBA2,KIAA1549,DGKE,APOD,PPFIA3,APP,ARAF,ARCN1,SPTBN4,PHOX2A,SLC25A12,ASS1,NCOA1,ZFHX3,ATP1A1,ATP1A3,GRHL3,MARCO,NPAS4,MYH10,MYL4,KIF1A,NEXMIF,ADGRB2,BBS1,NAPA,RTL4,BGN,NEUROD2,NF2,NFATC2,NFIX,AP1S2,CACNA1G,BSN,MYRF,NPAS1,CACNA1A,CACNA1C,C…
Mouse Phenotype	MP:0001463	abnormal spatial learning		1.453E-5	1.103E-1	4.597E-3	4.373E-2	60	272	MBP,ADAM11,FZD9,LRFN2,GIT1,APOD,APP,NCOA1,ATP1A3,AP1S2,WASF1,NTRK2,PRKN,DLGAP2,DSTYK,SEPTIN5,ITSN2,ZBTB20,PTPRZ1,DLG3,ZDHHC9,ENO2,KCNIP3,RXRB,ATXN1,FGF13,BAIAP2,ITSN1,DLGAP4,SCLY,ARSG,SLC6A8,SLC6A9,RGS14,SLC8A2,CAMKK2,SHANK2,TET1,SORCS3,FYN,SORL1,KIF21B,DISC1,IQSEC2,CLSTN2,NCDN,WWC1,TCF4,GRID2,ATP13A2,TAFA2,HRH3,UBE2A,RBFOX3,HTR2C,SHANK3,ITGA5,KCNAB1,TMEM163,SLC17A6
Mouse Phenotype	MP:0001405	impaired coordination		1.810E-5	1.375E-1	5.499E-3	5.231E-2	99	515	MBP,ADAM11,ARID1B,ATXN3,ABCD1,TRIB2,GAS7,APP,ARCN1,SLC25A12,NCOA1,ATP1A3,MYH10,BMP7,NEUROD2,NF2,KLF9,CACNA1G,HERC2,WASF1,CACNA1A,CACNA1C,CAMK2B,C1QL3,NR4A2,SYT2,PRKN,PBX3,SRRM3,PCDH9,OTOG,CACNA2D2,SUN2,PITX3,JAKMIP1,MTO1,IGDCC3,GTF2IRD1,ITSN2,RBFOX1,FEV,SNPH,DCTN1,PTPRR,PTPRZ1,EEF1A2,MBNL2,OTOP1,CAMKMT,APC2,FCER1G,ATXN1,ATXN2,FDFT1,SCN4A,SCN8A,FGFR1,ITSN1,TRAK1,SLC6A8,SLC8A3,SIRT2,SHANK2,SOX10,NK…
Mouse Phenotype	MP:0002199	abnormal brain commissure morphology		1.964E-5	1.491E-1	5.736E-3	5.456E-2	47	199	MAP1B,MBP,ARID1B,ANK2,APBB2,APP,MSX1,NAPA,NRP2,NFIB,NFIX,WASF1,OTX1,CD81,PDHA1,CLCN2,ITSN2,DHCR7,ULK4,FEZF2,EBF1,EFNB2,ZDHHC9,EPHA4,EPHB1,EPHB2,EPHB3,EXT1,FGFR1,FGFR2,SEMA3F,ITSN1,DMRTA2,FYN,SOX3,ZNF423,IQSEC2,NPAS3,MAPK8IP3,GPM6B,NR2F1,AP4E1,NDST1,SHANK3,ITPR3,UBE3B,VTI1A
Mouse Phenotype	MP:0002888	abnormal NMDA-mediated synaptic currents		2.383E-5	1.810E-1	6.704E-3	6.377E-2	14	33	WASF1,LGI1,DLGAP3,NRXN3,NRXN2,EPS8,FABP7,CLSTN1,SLC6A9,TCF4,GRIK4,GRIN2C,SHANK3,TMEM163
Mouse Phenotype	MP:0002065	abnormal fear/anxiety-related behavior		4.090E-5	3.106E-1	1.100E-2	1.047E-1	86	442	ABCA2,MAP6,ADARB2,ELFN2,ADORA1,ADORA2A,ARID1B,LRFN2,GIT1,APBA2,BCAS1,APP,ARAF,SLC25A12,ATP1A1,ATP1A3,NPAS4,NFATC2,WASF1,CACNA1C,CACNA1E,NRAP,CAMK2B,C1QL3,NTRK2,NR4A2,OPRD1,PRKN,PENK,B4GALT5,ZNF462,DLGAP3,CLCN6,NRXN2,PITX3,JAKMIP1,MTO1,SEPTIN5,GABBR2,GTF2IRD1,CSK,AUTS2,FEV,ZFP42,ZBTB20,PGBD5,TAFA3,ZDHHC9,DYNC1LI1,CAMKMT,ENO2,EXT1,KCNIP3,FABP7,ATXN1,SCN8A,FGF13,DLGAP4,SLC1A3,ARSG,CYFIP2,SHANK2,TPH2…
Mouse Phenotype	MP:0009142	decreased prepulse inhibition		4.250E-5	3.227E-1	1.100E-2	1.047E-1	51	228	MAP6,ARID1B,LRFN2,MTA3,AKT1,TRIB2,BCAS1,TMEM108,ATP1A3,CAMK2B,NTRK2,SHISA9,PCDH9,PDGFRB,DUOX2,PREP,SETBP1,FAM53B,CTNNA2,HMGN5,TOX,FAM162A,HBEGF,DTX1,TMEM51,MAMLD1,EBF1,KLHL5,LEF1,ENO2,HUNK,FABP7,CIB2,SLC5A5,SLC6A1,ZNF609,DISC1,MBOAT2,NCDN,TCF4,TTC28,SUN1,GRIK4,ZDHHC17,PALM3,IGSF21,VDR,SHANK3,GIPC3,ANKS1B,TMEM163
Mouse Phenotype	MP:0002067	abnormal sensory capabilities/reflexes/nociception		4.347E-5	3.301E-1	1.100E-2	1.047E-1	195	1172	ABCA2,MAP1B,MBP,ACTG1,BTBD9,ADARB2,ADORA1,ADORA2A,ARID1B,LRFN2,FAM110B,TSHZ3,TRIB2,AIRE,APP,ARAF,MADD,SPTBN4,MSX1,ARL3,SLC25A12,TMEM108,ATP1A3,ABCC3,MYO1D,KIF1A,MYO10,NAPA,NF2,NFIX,NHS,BSN,CDK5R2,CACNA1A,CACNA1C,CACNA1D,CACNA1E,CACNA1S,NPR2,NTRK2,BRSK2,NR4A2,SLC7A7,OPRD1,OSM,OXTR,PRKN,LRBA,PBX3,PCDH9,OTOG,PIRT,CACNA2D2,PDE6B,PENK,CHRM3,CLCN6,OTOF,PITX3,RETREG1,PLCB3,MTO1,PYCR2,STOML3,CNGA3,CNTFR,…
Mouse Phenotype	MP:0001362	abnormal anxiety-related response		4.742E-5	3.601E-1	1.162E-2	1.105E-1	77	387	MAP6,ADARB2,ELFN2,ADORA1,ADORA2A,ARID1B,GIT1,APBA2,BCAS1,APP,ARAF,SLC25A12,ATP1A1,ATP1A3,NPAS4,NFATC2,WASF1,CACNA1C,CACNA1E,NRAP,CAMK2B,C1QL3,NTRK2,OPRD1,PRKN,PENK,B4GALT5,ZNF462,DLGAP3,CLCN6,NRXN2,PITX3,JAKMIP1,MTO1,SEPTIN5,GABBR2,GTF2IRD1,CSK,AUTS2,FEV,ZFP42,ZBTB20,TAFA3,ZDHHC9,DYNC1LI1,ENO2,EXT1,KCNIP3,FABP7,ATXN1,SCN8A,FGF13,DLGAP4,SLC1A3,CYFIP2,SHANK2,TPH2,SV2C,DISC1,GJB6,IQSEC2,NPAS3,ADGRL3…
Mouse Phenotype	MP:0002557	abnormal social/conspecific interaction		6.789E-5	5.155E-1	1.599E-2	1.521E-1	77	391	MAP6,MBP,ELFN2,ADORA2A,ARID1B,LRFN2,AEBP1,IRS4,APBA2,AP3B1,SPTBN4,TNFSF11,BBS1,NFATC2,NPAS1,CACNA1A,CACNA1C,CAMK2B,NTRK2,SLC7A7,OXTR,NEURL1,PCDH9,DLGAP2,DLGAP1,CACNA2D2,PDGFRB,NRXN2,JAKMIP1,MAGED1,SEPTIN5,GTF2IRD1,CSK,FEV,CTNNA2,CUX1,PDE11A,HBEGF,TAFA3,LIN28A,EPHA4,ETV5,EXT1,ATG7,DLGAP4,ADGRL1,SLC6A1,SHANK2,TPH2,NR5A1,FYN,SLC9A9,DISC1,IQSEC2,NPAS3,CDH23,PDE10A,LPIN1,KIRREL3,SYN2,GNAL,GRID2,ATP13A…
Mouse Phenotype	MP:0011087	neonatal lethality, complete penetrance		7.112E-5	5.401E-1	1.599E-2	1.521E-1	127	717	MAP1B,ACVR1,ADA,MEIS2,EHBP1L1,MMP14,TSHZ3,MADD,MSX1,ASS1,ATP1A3,MTX1,MYH10,NFIB,NOTCH2,CACNA1C,NTRK2,ROR1,BRSK2,NR4A2,RUNX2,OTX1,DPP9,PBX1,PBX3,SRRM3,CDH1,CDKN1C,PDE4D,CRLF1,NRXN3,NRXN2,SUN2,PIP4K2A,PKP1,ECEL1,CNN3,CNTFR,PRRX1,COL11A1,PODXL,CHST11,ADGRA2,CREB5,FOXP4,HS2ST1,DNM3,AUTS2,PRKAR1A,MAPK4,TCF7L1,MAGI2,PTPRS,DHCR7,FAT4,ECE1,GPC6,RFX4,GSC,EFNB2,RHOT1,ETV4,ETV5,EXT1,FBLN1,SALL1,ADAMTS20,FGF…
Mouse Phenotype	MP:0003107	abnormal response to novelty		7.228E-5	5.489E-1	1.599E-2	1.521E-1	65	317	MAP1B,ADORA2A,ARID1B,ATXN3,TRIB2,SH3RF1,APBA2,APP,ATP1A1,ATP1A3,MYO10,ADGRB1,RTL4,AP1S2,WASF1,CACNA1C,NTRK2,PRKN,PBX3,NRXN2,PITX3,MTO1,MAGED1,GTF2IRD1,AUTS2,ERC2,TAFA3,DYNC1LI1,ENO2,ATXN1,FGF12,ATG7,DLGAP4,ARSG,SLC5A5,SLC6A1,SLC6A8,RGS14,SHANK2,TPH2,SLC9A9,JPH4,DISC1,IQSEC2,NPAS3,CDH23,PDE10A,SLITRK2,GNAL,GNAS,TCF4,GRID2,ATP13A2,HRH1,VDR,HTR2C,SHANK3,ELFN1,NAV2,TMEM163,SLC17A6,CERS6,NIPAL3,LRP1,J…
Mouse Phenotype	MP:0001468	abnormal temporal memory		7.432E-5	5.644E-1	1.599E-2	1.521E-1	48	215	BTBD9,ADARB2,PTCHD1,LRFN2,GIT1,APP,TMEM108,ATP1A3,KSR1,KLF9,NPAS2,CACNA1C,CAMK2B,C1QL3,NTRK2,OXTR,PCDH9,CHRM3,GABBR2,ITSN2,AUTS2,PRKCB,ZBTB20,PTPRZ1,ENO2,KCNIP3,FABP7,ATXN1,ITSN1,SLC6A1,SLC6A8,RGS14,SLC8A2,TET1,SPEN,JPH4,DISC1,SYN2,WWC1,GRIN2C,TAFA2,UBE2A,SHANK3,TMEM163,SLC17A6,LMX1B,LRP1,JPH3
Mouse Phenotype	MP:0004166	abnormal limbic system morphology		7.581E-5	5.757E-1	1.599E-2	1.521E-1	85	443	MAP1B,FZD9,ARID1B,LRFN2,SEMA6A,VPS18,TRIB2,ANK3,APBB2,TMEM108,ATP1A3,BBS1,NRP2,NFIB,NFIX,WASF1,CDK5R2,NTRK2,BRSK2,OTX1,PRKN,CD81,DNAAF1,LGI1,PDE6B,COL4A1,GABBR2,CHMP2B,CSPG4,PRKAB1,CTNNA2,CTSD,PROX1,ZBTB20,DAB1,PURA,ARNT2,PDCD6IP,FEZF2,LEF1,ENO2,RHOT1,APC2,LRRK2,FABP7,ATXN1,FGF8,FGF13,SEMA3F,ATG7,ITSN1,DPYSL4,SLC1A2,ARSG,SLC6A8,TET1,TPH2,CDK5RAP2,DMRTA2,NR5A1,SPEN,FYN,SOX3,DISC1,ZNF423,IQSEC2,NPA…
Mouse Phenotype	MP:0001399	hyperactivity		7.798E-5	5.922E-1	1.600E-2	1.522E-1	114	632	ABCA2,MAP6,BTBD9,ELFN2,PTCHD1,SCAMP5,SORCS2,AKT1,UNC79,GIT1,DGKE,PPFIA3,APP,SLC25A12,NCOA1,ATP1A3,NPAS4,MYL4,NEXMIF,ADGRB2,RTL4,NEUROD2,NFIX,CACNA1G,NPAS1,CAMK2B,C1QL3,NTRK2,NR4A2,CTDSP1,OPRD1,OXTR,PCDH9,OTOG,DLGAP2,CACNA2D2,PDE6B,PITX3,FTO,MTO1,GABBR2,GTF2IRD1,ZBTB20,PGBD5,PDE11A,FEZF2,SOBP,HBEGF,TAFA3,ATP9A,SLC45A2,JPT1,ENO2,RCAN2,EPHB2,LRRK2,EXT1,KCNIP3,FABP7,ATXN1,ATXN2,FGF12,FGF13,ATG7,DLGAP…
Mouse Phenotype	MP:0000801	abnormal temporal lobe morphology		8.586E-5	6.520E-1	1.716E-2	1.632E-1	78	400	MAP1B,FZD9,ARID1B,LRFN2,SEMA6A,VPS18,TRIB2,ANK3,APBB2,SPTBN4,TMEM108,ATP1A3,BBS1,NRP2,NFIB,NFIX,CDK5R2,BRSK2,OTX1,PRKN,CD81,DNAAF1,LGI1,PDE6B,COL4A1,GABBR2,CHMP2B,CSPG4,PRKAB1,CTNNA2,CTSD,PROX1,ZBTB20,DAB1,PURA,PDCD6IP,FEZF2,LEF1,ENO2,RHOT1,APC2,LRRK2,FABP7,ATXN1,FGF13,SEMA3F,ATG7,ITSN1,DPYSL4,SLC1A2,ARSG,SLC6A8,TPH2,CDK5RAP2,DMRTA2,SPEN,FYN,DISC1,ZNF423,IQSEC2,NPAS3,NCDN,MAPK8IP3,GPT2,ZDHHC17,CI…
Mouse Phenotype	MP:0008143	abnormal dendrite morphology		9.755E-5	7.408E-1	1.885E-2	1.793E-1	55	259	MAP1B,MCF2,LRFN2,SEMA6A,GIT1,ARCN1,TMEM108,MYH10,BBS1,NRP2,HERC2,CACNA1A,NTRK2,SEMA5A,PCDH9,DLGAP2,SEMA5B,SUN2,CNTN1,CHMP2B,RBFOX1,PRKAB1,DAB2IP,DYNC1LI1,RHOT1,LRRK2,ATXN1,ATG7,DLGAP4,CLSTN1,SLC1A3,CYFIP2,CAMKK2,SHANK2,KIF21B,IP6K3,ZNF423,MTCL1,SUN1,GRID2,GRIK4,SRCIN1,TAFA2,THRA,RBFOX3,SHANK3,ELFN1,TANC1,RNF112,DPYSL5,ITPR1,KCNJ6,SLC17A6,UBE3B,LRP1
Mouse Phenotype	MP:0003312	abnormal locomotor coordination		1.004E-4	7.627E-1	1.885E-2	1.793E-1	136	783	MAP1B,MBP,ACVR1,PTCHD1,ABCD1,MMP14,ANK3,OSTM1,GIT1,APBA1,APBA2,APP,ARAF,ARCN1,SPTBN4,SLC25A12,ASS1,ATP1A3,MARCO,MYH10,KIF1A,NAPA,BGN,NEUROD2,NF2,NFIX,CACNA1G,BSN,MYRF,NPAS1,CACNA1A,CAMK2B,NTRK2,SYT2,NEURL1,PRKN,PAX7,PBX3,SRRM3,OTOG,CACNA2D2,ENPP1,NRXN2,SUN2,PITX3,CNTN1,SLC31A1,GAL3ST1,GTF2IRD1,PPP2R5C,RBFOX1,PRKAB1,CTNNA2,CTSD,DAB1,DCTN1,PTPRR,PURA,TMEM51,OTOP1,DYNC1LI1,JHY,EPHA4,APC2,PI4K2A,ETV4…
Mouse Phenotype	MP:0003313	abnormal locomotor activation		1.018E-4	7.729E-1	1.885E-2	1.793E-1	231	1442	ABCA2,MAP1B,MAP6,ACTA1,MBP,ACTG1,BTBD9,ELFN2,ADORA2A,PTCHD1,ARID1B,SCAMP5,ATXN3,SORCS2,AKT1,ABCD1,MMP14,UNC79,TSHZ3,KIF6,TRIB2,ANK3,GIT1,APBA2,KIAA1549,DGKE,APOD,PPFIA3,APP,SPTBN4,PHOX2A,SLC25A12,NCOA1,ZFHX3,ATP1A1,ATP1A3,GRHL3,NPAS4,MYL4,KIF1A,NEXMIF,ADGRB2,BBS1,RTL4,NEUROD2,NFATC2,NFIX,AP1S2,CACNA1G,NPAS1,CACNA1A,CACNA1C,CACNA1S,CAMK2B,C1QL3,NTRK2,BRSK2,NR4A2,CTDSP1,SYT7,OPRD1,OXTR,PRKN,CD81,PB…
Mouse Phenotype	MP:0000841	abnormal hindbrain morphology		1.099E-4	8.349E-1	1.988E-2	1.891E-1	109	604	MAP1B,MBP,ATXN3,SORCS2,SEMA6A,VPS18,ANK1,ANK3,APP,SEMA4G,ARCN1,SPTBN4,MSX1,PHOX2A,ASS1,KCNK5,NCOA1,MYH10,NAPA,NEUROD2,NFIB,CYP26C1,CACNA1G,HERC2,CDK5R2,CACNA1A,CACNA1D,NTRK2,OTX1,PRKN,SRRM3,LGI1,CACNA2D2,PDHA1,GPR37L1,CLCN2,OTOF,SUN2,JAKMIP1,CNTFR,CNTN1,ADAMTS3,SH3PXD2A,RBFOX1,PRKAB1,CTNNA2,DAB2IP,DAB1,PURA,EBF1,RFX4,GSC,EEF1A2,ENO2,EPB41L1,APC2,PI4K2A,EXT1,ZIC4,ATXN1,ATXN2,SCN8A,FGF8,FGF13,FGFR1…
Mouse Phenotype	MP:0011084	lethality at weaning, incomplete penetrance		1.146E-4	8.701E-1	2.024E-2	1.925E-1	16	46	OSTM1,NFE2L2,NFIX,ZBTB20,FGFR3,SOX10,JPH4,ZNF423,LPIN1,TSHR,VIPR1,HTR2C,KCNJ6,KIF5A,KIT,JPH3
Mouse Phenotype	MP:0009701	abnormal birth body size		1.200E-4	9.117E-1	2.072E-2	1.971E-1	56	267	ARID1B,AKT1,MMP14,MNT,ANK1,CITED1,SLC4A4,KIF1A,BBS1,BMP7,NTRK2,RUNX2,SLC7A7,PAX7,CDH1,ZNF462,SUN2,PKP1,RAPGEF2,HP1BP3,DHCR7,FAT4,GLIS3,GSC,LIN28A,MBNL2,NHEJ1,ESRRG,FGFR2,BICC1,RASA3,SH3GL3,TET1,SUMO3,SOX10,APEX2,DGAT2,GLG1,GNAS,TCF7L2,ARHGEF28,SYNE1,UBR4,SUN1,GRB10,GRID2,POFUT1,UBE2A,UBE2B,XPNPEP1,BCL11B,IGF1R,INSR,SLC17A6,HMGA2,SMAD7
Mouse Phenotype	MP:0008026	abnormal brain white matter morphology		1.351E-4	1.000E0	2.280E-2	2.169E-1	54	256	MAP1B,MBP,ARID1B,ANK2,APBB2,APP,AP3B1,MSX1,NAPA,NRP2,NFIB,NFIX,WASF1,OTX1,CD81,PDHA1,CFAP54,CLCN2,ITSN2,DHCR7,PURA,ULK4,FEZF2,EBF1,EFNB2,ZDHHC9,EPHA4,EPHB1,EPHB2,EPHB3,EXT1,FGFR1,FGFR2,SEMA3F,ITSN1,DMRTA2,FYN,SOX3,NMNAT2,ZNF423,IQSEC2,NPAS3,MAPK8IP3,GPM6B,ZDHHC17,NR2F1,AP4E1,TTL,NDST1,RBFOX3,SHANK3,ITPR3,UBE3B,VTI1A
Mouse Phenotype	MP:0000807	abnormal hippocampus morphology		1.513E-4	1.000E0	2.415E-2	2.297E-1	76	394	MAP1B,FZD9,ARID1B,LRFN2,SEMA6A,VPS18,TRIB2,ANK3,APBB2,TMEM108,ATP1A3,BBS1,NRP2,NFIB,NFIX,CDK5R2,BRSK2,OTX1,PRKN,CD81,DNAAF1,LGI1,PDE6B,COL4A1,GABBR2,CHMP2B,CSPG4,PRKAB1,CTNNA2,CTSD,PROX1,ZBTB20,DAB1,PURA,PDCD6IP,FEZF2,LEF1,ENO2,RHOT1,APC2,LRRK2,FABP7,ATXN1,FGF13,SEMA3F,ATG7,ITSN1,DPYSL4,SLC1A2,ARSG,SLC6A8,TPH2,CDK5RAP2,DMRTA2,SPEN,FYN,ZNF423,IQSEC2,NPAS3,NCDN,MAPK8IP3,GPT2,ZDHHC17,CIT,TAFA2,THRA,…
Mouse Phenotype	MP:0012315	impaired learning		1.520E-4	1.000E0	2.415E-2	2.297E-1	30	118	PTCHD1,APP,ATP1A3,AP1S2,NR4A2,DSTYK,GABBR2,ZDHHC9,CAMKMT,ENO2,DLGAP4,ARSG,SLC6A8,CAMKK2,TET1,SORCS3,SORL1,KIF21B,DISC1,IQSEC2,CLSTN2,WWC1,TCF4,TAFA2,UBE2A,RBFOX3,HTR2C,SHANK3,ITPR3,TMEM163
Mouse Phenotype	MP:0012307	impaired spatial learning		1.526E-4	1.000E0	2.415E-2	2.297E-1	20	66	ATP1A3,AP1S2,DSTYK,ZDHHC9,ENO2,DLGAP4,SLC6A8,TET1,SORCS3,SORL1,KIF21B,IQSEC2,CLSTN2,WWC1,TCF4,TAFA2,UBE2A,RBFOX3,SHANK3,TMEM163
Mouse Phenotype	MP:0001458	abnormal object recognition memory		1.643E-4	1.000E0	2.511E-2	2.388E-1	26	97	GIT1,APP,ATP1A3,WASF1,CAMK2B,PCDH9,CSK,AUTS2,ZBTB20,RCAN2,FGF13,BAIAP2,SLC6A1,SLC6A8,RGS14,SLC8A2,SORL1,JPH4,SYN2,SRCIN1,TAFA2,THRA,RBFOX3,SHANK3,LMX1B,JPH3
Mouse Phenotype	MP:0009703	decreased birth body size		1.653E-4	1.000E0	2.511E-2	2.388E-1	55	264	ARID1B,AKT1,MMP14,MNT,ANK1,CITED1,SLC4A4,KIF1A,BBS1,BMP7,NTRK2,RUNX2,SLC7A7,PAX7,CDH1,ZNF462,SUN2,PKP1,RAPGEF2,HP1BP3,DHCR7,FAT4,GLIS3,GSC,LIN28A,MBNL2,NHEJ1,ESRRG,FGFR2,BICC1,RASA3,SH3GL3,TET1,SUMO3,SOX10,APEX2,DGAT2,GLG1,GNAS,TCF7L2,ARHGEF28,SYNE1,UBR4,SUN1,GRID2,POFUT1,UBE2A,UBE2B,XPNPEP1,BCL11B,IGF1R,INSR,SLC17A6,HMGA2,SMAD7
Mouse Phenotype	MP:0003088	abnormal prepulse inhibition		1.776E-4	1.000E0	2.645E-2	2.516E-1	63	314	MAP6,KLHL29,ARID1B,LRFN2,MTA3,AKT1,TRIB2,BCAS1,TMEM108,ATP1A3,NEXMIF,NPAS1,CAMK2B,NTRK2,SHISA9,PCDH9,PDGFRB,SEPTIN5,DUOX2,PREP,SETBP1,FAM53B,CTNNA2,DNAJB12,HMGN5,ZNF536,TOX,FAM162A,HBEGF,DTX1,TMEM51,MAMLD1,EBF1,KLHL5,LEF1,ENO2,RSAD1,HUNK,FABP7,CIB2,CYFIP2,SLC5A5,SLC6A1,ZNF609,DISC1,NPAS3,MBOAT2,NCDN,TCF4,TTC28,SUN1,GRID2,GRIK4,ZDHHC17,GRM4,AP4E1,PALM3,IGSF21,VDR,SHANK3,GIPC3,ANKS1B,TMEM163
Mouse Phenotype	MP:0000572	abnormal autopod morphology		2.037E-4	1.000E0	2.974E-2	2.829E-1	77	404	ACVR1,AXIN2,MSX1,MYO10,PRDM1,BMP7,BMPR1B,NPR2,RIPK4,RUNX2,PDGFRB,ENPP1,PDZK1,HS6ST1,PLCG2,PRRX1,TBX4,CHST11,HS2ST1,TCF7L1,GLIS1,CPLANE2,IFT140,TRAF3IP1,IFT172,PTK7,DHCR7,TMEM132A,EDA,MEGF8,ETV4,ETV5,MECOM,FBLN1,FBN2,SALL1,FMN1,USP12,ADAMTS20,FGF8,FGFR1,FGFR2,BAIAP2,FRAS1,SFRP1,TENT5A,CXXC5,FBXW4,HHAT,SP6,SMARCA4,SOX5,GALK2,MAP3K20,STAT1,GPC3,GLI2,SYK,TBX5,TBX3,ANKH,RNF165,GRIP1,GRIP2,ALX4,CYP26B1…
Mouse Phenotype	MP:0009936	abnormal dendritic spine morphology		2.348E-4	1.000E0	3.364E-2	3.200E-1	26	99	LRFN2,GIT1,TMEM108,BBS1,NRP2,PCDH9,DLGAP2,CHMP2B,RBFOX1,LRRK2,ATG7,DLGAP4,CLSTN1,CYFIP2,SHANK2,KIF21B,IP6K3,SRCIN1,RBFOX3,SHANK3,ELFN1,TANC1,RNF112,SLC17A6,UBE3B,LRP1
[truncated: 19 more rows]

## Sheet: f1_hippocampus_diseases
Category	ID	Name	Source	p-value	q-value Bonferroni	q-value FDR B&H	q-value FDR B&Y	Hit Count in Query List	Hit Count in Genome	Hit in Query List
[truncated: 92 more rows]

## Sheet: f1_cortex
Category	ID	Name	Source	p-value	q-value Bonferroni	q-value FDR B&H	q-value FDR B&Y	Hit Count in Query List	Hit Count in Genome	Hit in Query List
[truncated: 1,358 more rows]

## Sheet: f1_cortex_diseases
Category	ID	Name	Source	p-value	q-value Bonferroni	q-value FDR B&H	q-value FDR B&Y	Hit Count in Query List	Hit Count in Genome	Hit in Query List
[truncated: 145 more rows]

[truncated: 2 more sheets: f0_cortex, f0_cortex_diseases]
